# Supplementary material for: Potential early clinical stage colorectal cancer diagnosis using a proteomics blood test panel
Source: Clin Proteomics. 2019 Aug 28;16:34. doi: 10.1186/s12014-019-9255-z (PMC6712843; doi:10.1186/s12014-019-9255-z)
Supplement: Supplementary file 2 — Additional file 2: Table S1. List of identified proteins/peptides from different peptide fractionation methods. [file 12014_2019_9255_MOESM2_ESM.xlsx]

## Sheet: SAX
Accessions	Sequence	Modifications	Cleavages	Uniqueness	Matching PMIDs
sp|P08603|CFAH_HUMAN	AGEQVTYTCATYYK	Carbamidomethyl(C)@9		1	P08603
sp|P08603|CFAH_HUMAN	AQTTVTCMENGWSPTPR	Carbamidomethyl(C)@7; Deamidated(N)@10		1	P08603
sp|P08603|CFAH_HUMAN	AVYTCNEGYQLLGEINYR	Carbamidomethyl(C)@5		1	P08603
sp|P08603|CFAH_HUMAN	CFEGFGIDGPAIAK	Carbamidomethyl(C)@1		1	P08603
sp|P08603|CFAH_HUMAN	CGHPGDTPFGTFTLTGGNVFEYGVK	Carbamidomethyl(C)@1	cleaved P-C@N-term	1	P08603
sp|P08603|CFAH_HUMAN	CGPPPPIDNGDITSFPLSVYAPASSVEYQCQNLYQLEGNKR	Carbamidomethyl(C)@1; Deoxy(D)@11; Carbamidomethyl(C)@30; Deamidated(Q)@35	missed K-R@40	2	P08603, Q03591
sp|P08603|CFAH_HUMAN	CKSSNLIILEEHLK	Carbamidomethyl(C)@1	missed K-S@2	1	P08603
sp|P08603|CFAH_HUMAN	CLGEKWSHPPSCIK	Carbamidomethyl(C)@1; Carbamidomethyl(C)@12	missed K-W@5	1	P08603
sp|P08603|CFAH_HUMAN	CLHPCVISR	Carbamidomethyl(C)@1; Carbamidomethyl(C)@5		2	P08603, Q03591
sp|P08603|CFAH_HUMAN	CLPVTAPENGK	Carbamidomethyl(C)@1		1	P08603
sp|P08603|CFAH_HUMAN	CLPVTAPENGKIVSSAMEPDREYHFGQAVR	Carbamidomethyl(C)@1	missed K-I@11; missed R-E@21	1	P08603
sp|P08603|CFAH_HUMAN	CNMGYEYSER	Carbamidomethyl(C)@1		1	P08603
sp|P08603|CFAH_HUMAN	CNMGYEYSERGDAVCTESGWRPLPSCEEK	Carbamidomethyl(C)@1; Carbamidomethyl(C)@15; Carbamidomethyl(C)@26	missed R-G@10	1	P08603
sp|P08603|CFAH_HUMAN	CTLKPCDYPDIK	Carbamidomethyl(C)@1; Carbamidomethyl(C)@6		1	P08603
sp|P08603|CFAH_HUMAN	CTSTGWIPAPR	Carbamidomethyl(C)@1		1	P08603
sp|P08603|CFAH_HUMAN	CVEISCKSPDVINGSPISQK	Carbamidomethyl(C)@1; Carbamidomethyl(C)@6	missed K-S@7	1	P08603
sp|P08603|CFAH_HUMAN	CYFPYLENGYNQNYGR	Carbamidomethyl(C)@1		2	P08603, Q02985
sp|P08603|CFAH_HUMAN	CYFPYLENGYNQNYGRK	Carbamidomethyl(C)@1	missed R-K@16	2	P08603, Q02985
sp|P08603|CFAH_HUMAN	DGEKVSVLCQENYLIQEGEEITCK	Carbamidomethyl(C)@9; Carbamidomethyl(C)@23	missed K-V@4	1	P08603
sp|P08603|CFAH_HUMAN	DGEKVSVLCQENYLIQEGEEITCKDGR	Carbamidomethyl(C)@9; Carbamidomethyl(C)@23	missed K-V@4; missed K-D@24	1	P08603
sp|P08603|CFAH_HUMAN	DGRWQSIPLCVEK	Carbamidomethyl(C)@10	missed R-W@3	1	P08603
sp|P08603|CFAH_HUMAN	DGWSAQPTCIK	Carbamidomethyl(C)@9		1	P08603
sp|P08603|CFAH_HUMAN	DQYKVGEVLK		missed K-V@4	1	P08603
sp|P08603|CFAH_HUMAN	DSTGKCGPPPPIDNGDITSFPLSVYAPASSVEYQCQNLYQLEGNKR	Carbamidomethyl(C)@6; Carbamidomethyl(C)@35	missed K-C@5; missed K-R@45	2	P08603, Q03591
sp|P08603|CFAH_HUMAN	DTSCVNPPTVQNAYIVSR	Carbamidomethyl(C)@4		1	P08603
sp|P08603|CFAH_HUMAN	DVACHPGYALPK	Carbamidomethyl(C)@4	cleaved I-D@N-term	1	P08603
sp|P08603|CFAH_HUMAN	DVYKAGEQVTYTCATYYK	Carbamidomethyl(C)@13	missed K-A@4	1	P08603
sp|P08603|CFAH_HUMAN	ECDTDGWTNDIPICEVVK	Carbamidomethyl(C)@2; Carbamidomethyl(C)@14		1	P08603
sp|P08603|CFAH_HUMAN	ECELPKIDVHLVPDR	Carbamidomethyl(C)@2	missed K-I@6	1	P08603
sp|P08603|CFAH_HUMAN	ECELPKIDVHLVPDRK	Carbamidomethyl(C)@2	missed K-I@6; missed R-K@15	1	P08603
sp|P08603|CFAH_HUMAN	EDCNELPPR	Carbamidomethyl(C)@3	cleaved A-E@N-term	1	P08603
sp|P08603|CFAH_HUMAN	EDCNELPPRR	Carbamidomethyl(C)@3	cleaved A-E@N-term; missed R-R@9	1	P08603
sp|P08603|CFAH_HUMAN	EDCNELPPRRNTEILTGSWSDQTYPEGTQAIYK	Carbamidomethyl(C)@3	cleaved A-E@N-term; missed R-R@9; missed R-N@10	1	P08603
sp|P08603|CFAH_HUMAN	EEYGHSEVVEYYCNPR	Carbamidomethyl(C)@13		1	P08603
sp|P08603|CFAH_HUMAN	EGWIHTVCINGR	Carbamidomethyl(C)@8; Deamidated(N)@10		1	P08603
sp|P08603|CFAH_HUMAN	EIMENYNIALR			2	P08603, Q03591
sp|P08603|CFAH_HUMAN	EKTKEEYGHSEVVEYYCNPR	Carbamidomethyl(C)@17	missed K-T@2; missed K-E@4	1	P08603
sp|P08603|CFAH_HUMAN	EQVQSCGPPPELLNGNVK	Carbamidomethyl(C)@6; Deamidated(N)@14		1	P08603
sp|P08603|CFAH_HUMAN	EQVQSCGPPPELLNGNVKEK	Carbamidomethyl(C)@6; Deamidated(N)@14	missed K-E@18	1	P08603
sp|P08603|CFAH_HUMAN	EQVQSCGPPPELLNGNVKEKTKEEYGHSEVVEYYCNPR	Carbamidomethyl(C)@6; Carbamidomethyl(C)@35	missed K-E@18; missed K-T@20; missed K-E@22	1	P08603
sp|P08603|CFAH_HUMAN	FLMKGPNK		missed K-G@4	1	P08603
sp|P08603|CFAH_HUMAN	FSCKPGFTIVGP	Carbamidomethyl(C)@3	cleaved P-N@C-term	1	P08603
sp|P08603|CFAH_HUMAN	FSCKPGFTIVGPNSVQCYHFGLSPDLPICK	Carbamidomethyl(C)@3; Carbamidomethyl(C)@17; Carbamidomethyl(C)@29		1	P08603
sp|P08603|CFAH_HUMAN	FVCNSGYKIEGDEEMHCSDDGFWSKEKPK	Carbamidomethyl(C)@3; Carbamidomethyl(C)@17	missed K-I@8; missed K-E@25	1	P08603
sp|P08603|CFAH_HUMAN	GEINYRECDTDGWTNDIPICEVVK	Carbamidomethyl(C)@8; Carbamidomethyl(C)@20	cleaved L-G@N-term; missed R-E@6	1	P08603
sp|P08603|CFAH_HUMAN	GEWVALNPLR			1	P08603
sp|P08603|CFAH_HUMAN	GEWVALNPLRK		missed R-K@10	1	P08603
sp|P08603|CFAH_HUMAN	GKEGWIHTVCINGR	Carbamidomethyl(C)@10; Deamidated(N)@12	missed K-E@2	1	P08603
sp|P08603|CFAH_HUMAN	HGGLYHENMR			2	P08603, Q02985
sp|P08603|CFAH_HUMAN	IDVHLVPDR			1	P08603
sp|P08603|CFAH_HUMAN	IEGDEEMHCSDDGFWSK	Carbamidomethyl(C)@9		1	P08603
sp|P08603|CFAH_HUMAN	IEGDEEMHCSDDGFWSKEKPK	Carbamidomethyl(C)@9	missed K-E@17	1	P08603
sp|P08603|CFAH_HUMAN	ISEENETTCYMGK	Carbamidomethyl(C)@9		1	P08603
sp|P08603|CFAH_HUMAN	IVSSAMEPDR			1	P08603
sp|P08603|CFAH_HUMAN	IVSSAMEPDREYHFGQAVR		missed R-E@10	1	P08603
sp|P08603|CFAH_HUMAN	KCYFPYLENGYNQNYGR	Carbamidomethyl(C)@2; Deamidated(N)@9	missed K-C@1	2	P08603, Q02985
sp|P08603|CFAH_HUMAN	KCYFPYLENGYNQNYGRK	Carbamidomethyl(C)@2	missed K-C@1; missed R-K@17	2	P08603, Q02985
sp|P08603|CFAH_HUMAN	KDVYKAGEQVTYTCATYYK	Carbamidomethyl(C)@14	missed K-D@1; missed K-A@5	1	P08603
sp|P08603|CFAH_HUMAN	KGEWVALNPLR		missed K-G@1	1	P08603
sp|P08603|CFAH_HUMAN	KGEWVALNPLRK		missed K-G@1; missed R-K@11	1	P08603
sp|P08603|CFAH_HUMAN	KKDQYKVGEVLK		missed K-K@1; missed K-D@2; missed K-V@6	1	P08603
sp|P08603|CFAH_HUMAN	LGYVTADGETSGSITCGK	Carbamidomethyl(C)@16		1	P08603
sp|P08603|CFAH_HUMAN	LGYVTADGETSGSITCGKDGWSAQPTCIK	Carbamidomethyl(C)@16; Carbamidomethyl(C)@27	missed K-D@18	1	P08603
sp|P08603|CFAH_HUMAN	LSYTCEGGFR	Carbamidomethyl(C)@5		1	P08603
sp|P08603|CFAH_HUMAN	MSDSYQYGEEVTYK		cleaved H-M@N-term	1	P08603
sp|P08603|CFAH_HUMAN	NGFYPATR	Deamidated(N)@1		1	P08603
sp|P08603|CFAH_HUMAN	NGQWSEPPK	Deamidated(N)@1		3	P08603, P36980, Q03591
sp|P08603|CFAH_HUMAN	NGQWSEPPKCLHPCVISR	Carbamidomethyl(C)@10; Carbamidomethyl(C)@14	missed K-C@9	2	P08603, Q03591
sp|P08603|CFAH_HUMAN	NTEILTGSWSDQTYPEGTQAIYK			1	P08603
sp|P08603|CFAH_HUMAN	PICEVVKCLPVTAPENGKIVSSAMEPDREYHFGQAVR	Carbamidomethyl(C)@3; Carbamidomethyl(C)@8	cleaved I-P@N-term; missed K-C@7; missed K-I@18; missed R-E@28	1	P08603
sp|P08603|CFAH_HUMAN	QMSKYPSGER	Gln->pyro-Glu@N-term	missed K-Y@4	2	P08603, Q03591
sp|P08603|CFAH_HUMAN	RNTEILTGSWSDQTYPEGTQAIYK		missed R-N@1	1	P08603
sp|P08603|CFAH_HUMAN	RPCGHPGDTPFGTFTLTGGNVFEYGVK	Carbamidomethyl(C)@3		1	P08603
sp|P08603|CFAH_HUMAN	RPYFPVAVGK			2	P08603, Q02985
sp|P08603|CFAH_HUMAN	SCDIPVFMNAR	Carbamidomethyl(C)@2		1	P08603
sp|P08603|CFAH_HUMAN	SCDNPYIPNGDYSPLR	Carbamidomethyl(C)@2		1	P08603
sp|P08603|CFAH_HUMAN	SIDVACHPGYALPK	Carbamidomethyl(C)@6		1	P08603
sp|P08603|CFAH_HUMAN	SITCIHGVWTQLPQCVAIDK	Carbamidomethyl(C)@4; Carbamidomethyl(C)@15		1	P08603
sp|P08603|CFAH_HUMAN	SITCIHGVWTQLPQCVAIDKLK	Carbamidomethyl(C)@4; Carbamidomethyl(C)@15	missed K-L@20	1	P08603
sp|P08603|CFAH_HUMAN	SITCIHGVWTQLPQCVAIDKLKK	Carbamidomethyl(C)@4; Carbamidomethyl(C)@15	missed K-L@20; missed K-K@22	1	P08603
sp|P08603|CFAH_HUMAN	SLGNVIMVCR	Carbamidomethyl(C)@9		1	P08603
sp|P08603|CFAH_HUMAN	SLGNVIMVCRK	Carbamidomethyl(C)@9	missed R-K@10	1	P08603
sp|P08603|CFAH_HUMAN	SPDVINGSPISQK	Deamidated(N)@6		1	P08603
sp|P08603|CFAH_HUMAN	SPPEISHGVVAHMSDSYQYGEEVTYK	Carbamidomethyl(H)@12		1	P08603
sp|P08603|CFAH_HUMAN	SPPEISHGVVAHMSDSYQYGEEVTYKCFEGFGIDGPAIAK	Carbamidomethyl(C)@27	missed K-C@26	1	P08603
sp|P08603|CFAH_HUMAN	SSIDIENGFISESQYTYALK			1	P08603
sp|P08603|CFAH_HUMAN	SSIDIENGFISESQYTYALKEK		missed K-E@20	1	P08603
sp|P08603|CFAH_HUMAN	SSNLIILEEHLK			1	P08603
sp|P08603|CFAH_HUMAN	TDCLSLPSFENAIPMGEK	Carbamidomethyl(C)@3		1	P08603
sp|P08603|CFAH_HUMAN	TDCLSLPSFENAIPMGEKK	Carbamidomethyl(C)@3	missed K-K@18	1	P08603
sp|P08603|CFAH_HUMAN	TDCLSLPSFENAIPMGEKKDVYK	Carbamidomethyl(C)@3	missed K-K@18; missed K-D@19	1	P08603
sp|P08603|CFAH_HUMAN	TDCLSLPSFENAIPMGEKKDVYKAGEQVTYTCATYYK	Carbamidomethyl(C)@3; Deamidated(N)@11; Deamidated(Q)@27; Carbamidomethyl(C)@32	missed K-K@18; missed K-D@19; missed K-A@23	1	P08603
sp|P08603|CFAH_HUMAN	TGDEITYQCR	Carbamidomethyl(C)@9		1	P08603
sp|P08603|CFAH_HUMAN	TGDEITYQCRNGFYPATR	Carbamidomethyl(C)@9; Deamidated(N)@11	missed R-N@10	1	P08603
sp|P08603|CFAH_HUMAN	TGESVEFVCK	Carbamidomethyl(C)@9		2	P08603, Q03591
sp|P08603|CFAH_HUMAN	TGESVEFVCKR	Carbamidomethyl(C)@9	missed K-R@10	2	P08603, Q03591
sp|P08603|CFAH_HUMAN	TKEEYGHSEVVEYYCNPR	Carbamidomethyl(C)@15	missed K-E@2	1	P08603
sp|P08603|CFAH_HUMAN	TKNDFTWFK		missed K-N@2	1	P08603
sp|P08603|CFAH_HUMAN	TTCWDGKLEYPTCA	Carbamidomethyl(C)@3; Carbamidomethyl(C)@13	cleaved A-K@C-term; missed K-L@7	2	P08603, Q03591
sp|P08603|CFAH_HUMAN	TTCWDGKLEYPTCAK	Carbamidomethyl(C)@3; Carbamidomethyl(C)@13	missed K-L@7	2	P08603, Q03591
sp|P08603|CFAH_HUMAN	VSVLCQENYLIQEGEEITCK	Carbamidomethyl(C)@5; Deamidated(Q)@12; Carbamidomethyl(C)@19		1	P08603
sp|P08603|CFAH_HUMAN	VSVLCQENYLIQEGEEITCKDGR	Carbamidomethyl(C)@5; Carbamidomethyl(C)@19	missed K-D@20	1	P08603
sp|P08603|CFAH_HUMAN	VSVLCQENYLIQEGEEITCKDGRWQSIPLCVEK	Carbamidomethyl(C)@5; Deamidated(Q)@12; Carbamidomethyl(C)@19; Carbamidomethyl(C)@30	missed K-D@20; missed R-W@23	1	P08603
sp|P08603|CFAH_HUMAN	WQSIPLCVEK	Carbamidomethyl(C)@7		1	P08603
sp|P08603|CFAH_HUMAN	WQSIPLCVEKIPC	Carbamidomethyl(C)@7; Carbamidomethyl(C)@13	cleaved C-S@C-term; missed K-I@10	1	P08603
sp|P08603|CFAH_HUMAN	WSSPPQCEGLPCK	Carbamidomethyl(C)@7; Carbamidomethyl(C)@12		1	P08603
sp|P08603|CFAH_HUMAN	WTGRPTCRDTSCVNPPTVQNAYIVSR	Carbamidomethyl(C)@7; Carbamidomethyl(C)@12	missed R-D@8	1	P08603
sp|P08603|CFAH_HUMAN	YVTADGETSGSITCGK	Carbamidomethyl(C)@14	cleaved G-Y@N-term	1	P08603
sp|P08603|CFAH_HUMAN	WSHPPSCIK	Carbamidomethyl(C)@7		1	P08603
sp|P08603|CFAH_HUMAN	IIYKENERFQYK		missed K-E@4; missed R-F@8	1	P08603
sp|P08603|CFAH_HUMAN	GWSPAVPCLR	Carbamidomethyl(C)@8	cleaved D-G@N-term	2	P08603, Q02985
sp|P08603|CFAH_HUMAN	NSVQCYHFGLSPDLPICK	Carbamidomethyl(C)@5; Carbamidomethyl(C)@17	cleaved P-N@N-term	1	P08603
sp|P08603|CFAH_HUMAN	IIYKENER		missed K-E@4	1	P08603
sp|P08603|CFAH_HUMAN	YFPVAVGK		cleaved P-Y@N-term	2	P08603, Q02985
sp|P08603|CFAH_HUMAN	DVINGSPISQK	Deamidated(N)@4	cleaved P-D@N-term	1	P08603
sp|P08603|CFAH_HUMAN	DVHLVPDR		cleaved I-D@N-term	1	P08603
sp|P08603|CFAH_HUMAN	DTSCVNPPTVQNAY	Carbamidomethyl(C)@4	cleaved Y-I@C-term	2	P08603, Q03591
sp|P08603|CFAH_HUMAN	FVCNSGYKIEGDEEMHCSDDGFWSK	Carbamidomethyl(C)@3; Carbamidomethyl(E)@14; Carbamidomethyl(C)@17	missed K-I@8	1	P08603
sp|P08603|CFAH_HUMAN	TEILTGSWSDQTYPEGTQAIYK		cleaved N-T@N-term	1	P08603
sp|P08603|CFAH_HUMAN	SSAMEPDREYHFGQAVR		cleaved V-S@N-term; missed R-E@8	1	P08603
sp|P08603|CFAH_HUMAN	ECELPKIDVHLVPDRKK	Carbamidomethyl(C)@2	missed K-I@6; missed R-K@15; missed K-K@16	1	P08603
sp|P08603|CFAH_HUMAN	CQNLYQLEGNKR	Carbamidomethyl(C)@1	cleaved Q-C@N-term; missed K-R@11	2	P08603, Q03591
sp|P08603|CFAH_HUMAN	WSHPPSCIKTDCLSLPSFENAIPMGEKK	Carbamidomethyl(C)@7; Carbamidomethyl(C)@12; Deamidated(N)@20	missed K-T@9; missed K-K@27	1	P08603
sp|P08603|CFAH_HUMAN	NDFTWFK			1	P08603
sp|P08603|CFAH_HUMAN	ECELPK	Carbamidomethyl(C)@2		2	P08603, Q6IC83
sp|P08603|CFAH_HUMAN	EFDHNSNIR			1	P08603
sp|P08603|CFAH_HUMAN	HRTGDEITYQCR	Carbamidomethyl(C)@11	missed R-T@2	1	P08603
sp|P08603|CFAH_HUMAN	DIPICEVVK	Carbamidomethyl(C)@5	cleaved N-D@N-term	1	P08603
sp|P08603|CFAH_HUMAN	EWVALNPLR		cleaved G-E@N-term	1	P08603
sp|P08603|CFAH_HUMAN	TTCWDGKLEYPTCAKR	Carbamidomethyl(C)@3; Carbamidomethyl(C)@13	missed K-L@7; missed K-R@15	2	P08603, Q03591
sp|P08603|CFAH_HUMAN	WSSPPQCEGLPCKSPPEISHGVVAHMSDSYQYGEEVTYK	Carbamidomethyl(C)@7; Carbamidomethyl(C)@12	missed K-S@13	1	P08603
sp|P08603|CFAH_HUMAN	PPQIPNSHNMTTTLNYRDGEKVSVLCQENYLIQEGEEITCK	Oxidation(M)@10; Carbamidomethyl(C)@26; Carbamidomethyl(C)@40	cleaved P-P@N-term; missed R-D@17; missed K-V@21	1	P08603
sp|P08603|CFAH_HUMAN	NLIILEEHLK		cleaved S-N@N-term	1	P08603
sp|P08603|CFAH_HUMAN	SLGNVIMVCRKGEWVALNPLRK	Delta:H(4)C(2)@N-term; Carbamidomethyl(C)@9	missed R-K@10; missed K-G@11; missed R-K@21	1	P08603
sp|P08603|CFAH_HUMAN	PVAVGK		cleaved F-P@N-term	4	P08603, Q02985, Q96HY7, O43292
sp|P08603|CFAH_HUMAN	RDTSCVNPPTVQNAYIVSR	Dioxidation(R)@1; Carbamidomethyl(C)@5	cleaved C-R@N-term; missed R-D@1	1	P08603
sp|P08603|CFAH_HUMAN	SSQESYAHGTKLSYTCEGGFR	Deamidated(Q)@3; Carbamidomethyl(C)@16	missed K-L@11	1	P08603
sp|P08603|CFAH_HUMAN	FPYLENGYNQNYGR	PhosphoUridine(Y)@3	cleaved Y-F@N-term	2	P08603, Q02985
sp|P08603|CFAH_HUMAN	CQKRPCGHPGDTPFGTFTLTGGNVFEYGVK	Carbamidomethyl(C)@1; Deamidated(Q)@2; Carbamidomethyl(C)@6; Dehydrated(D)@11	missed K-R@3	1	P08603
sp|P08603|CFAH_HUMAN	TYALKEKAKYQCKLGYVTADGETSGSITCGK	HexNAc(T)@1; Carbamidomethyl(C)@12; Carbamidomethyl(C)@29	cleaved Y-T@N-term; missed K-E@5; missed K-A@7; missed K-Y@9; missed K-L@13	1	P08603
sp|P08603|CFAH_HUMAN	AGEQVTYTCATYYK	Carbamidomethyl(C)@9		1	P08603
sp|P08603|CFAH_HUMAN	AGEQVTYTCATYYK	Carbamidomethyl(C)@9		1	P08603
sp|P08603|CFAH_HUMAN	AGEQVTYTCATYYK	Carbamidomethyl(C)@9		1	P08603
sp|P08603|CFAH_HUMAN	AGEQVTYTCATYYK	Carbamidomethyl(C)@9		1	P08603
sp|P08603|CFAH_HUMAN	AGEQVTYTCATYYK	Carbamidomethyl(C)@9		1	P08603
sp|P08603|CFAH_HUMAN	AGEQVTYTCATYYK	Carbamidomethyl(C)@9		1	P08603
sp|P08603|CFAH_HUMAN	AGEQVTYTCATYYK	Carbamidomethyl(C)@9		1	P08603
sp|P08603|CFAH_HUMAN	AGEQVTYTCATYYK	Carbamidomethyl(C)@9		1	P08603
sp|P08603|CFAH_HUMAN	AGEQVTYTCATYYK	Carbamidomethyl(C)@9		1	P08603
sp|P08603|CFAH_HUMAN	AGEQVTYTCATYYK	Carbamidomethyl(C)@9		1	P08603
sp|P08603|CFAH_HUMAN	AGEQVTYTCATYYK	Carbamidomethyl(C)@9		1	P08603
sp|P08603|CFAH_HUMAN	AGEQVTYTCATYYK	Carbamidomethyl(C)@9		1	P08603
sp|P08603|CFAH_HUMAN	AGEQVTYTCATYYK	Carbamidomethyl(C)@9		1	P08603
sp|P08603|CFAH_HUMAN	AGEQVTYTCATYYK	Carbamidomethyl(C)@9		1	P08603
sp|P08603|CFAH_HUMAN	AGEQVTYTCATYYK	Carbamidomethyl(C)@9		1	P08603
sp|P08603|CFAH_HUMAN	AGEQVTYTCATYYK	Carbamidomethyl(C)@9		1	P08603
sp|P08603|CFAH_HUMAN	AGEQVTYTCATYYK	Carbamidomethyl(C)@9		1	P08603
sp|P08603|CFAH_HUMAN	AGEQVTYTCATYYK	Carbamidomethyl(C)@9		1	P08603
sp|P08603|CFAH_HUMAN	AGEQVTYTCATYYK	Carbamidomethyl(C)@9		1	P08603
sp|P08603|CFAH_HUMAN	AGEQVTYTCATYYK	Carbamidomethyl(C)@9		1	P08603
sp|P08603|CFAH_HUMAN	AGEQVTYTCATYYK	Carbamidomethyl(C)@9		1	P08603
sp|P08603|CFAH_HUMAN	AGEQVTYTCATYYK	Carbamidomethyl(C)@9		1	P08603
sp|P08603|CFAH_HUMAN	AGEQVTYTCATYYK	Carbamidomethyl(C)@9		1	P08603
sp|P08603|CFAH_HUMAN	AQTTVTCMENGWSPTPR	Carbamidomethyl(C)@7; Deamidated(N)@10		1	P08603
sp|P08603|CFAH_HUMAN	AQTTVTCMENGWSPTPR	Carbamidomethyl(C)@7; Deamidated(N)@10		1	P08603
sp|P08603|CFAH_HUMAN	AQTTVTCMENGWSPTPR	Carbamidomethyl(C)@7; Deamidated(N)@10		1	P08603
sp|P08603|CFAH_HUMAN	AQTTVTCMENGWSPTPR	Carbamidomethyl(C)@7; Deamidated(N)@10		1	P08603
sp|P08603|CFAH_HUMAN	AQTTVTCMENGWSPTPR	Carbamidomethyl(C)@7		1	P08603
sp|P08603|CFAH_HUMAN	AQTTVTCMENGWSPTPR	Carbamidomethyl(C)@7; Deamidated(N)@10		1	P08603
sp|P08603|CFAH_HUMAN	AQTTVTCMENGWSPTPR	Carbamidomethyl(C)@7; Deamidated(N)@10		1	P08603
sp|P08603|CFAH_HUMAN	AQTTVTCMENGWSPTPR	Carbamidomethyl(C)@7; Deamidated(N)@10		1	P08603
sp|P08603|CFAH_HUMAN	AQTTVTCMENGWSPTPR	Carbamidomethyl(C)@7; Deamidated(N)@10		1	P08603
sp|P08603|CFAH_HUMAN	AQTTVTCMENGWSPTPR	Carbamidomethyl(C)@7; Deamidated(N)@10		1	P08603
sp|P08603|CFAH_HUMAN	AQTTVTCMENGWSPTPR	Carbamidomethyl(C)@7; Deamidated(N)@10		1	P08603
sp|P08603|CFAH_HUMAN	AQTTVTCMENGWSPTPR	Carbamidomethyl(C)@7; Deamidated(N)@10		1	P08603
sp|P08603|CFAH_HUMAN	AQTTVTCMENGWSPTPR	Carbamidomethyl(C)@7; Deamidated(N)@10		1	P08603
sp|P08603|CFAH_HUMAN	AQTTVTCMENGWSPTPR	Carbamidomethyl(C)@7; Deamidated(N)@10		1	P08603
sp|P08603|CFAH_HUMAN	AQTTVTCMENGWSPTPR	Carbamidomethyl(C)@7; Deamidated(N)@10		1	P08603
sp|P08603|CFAH_HUMAN	AQTTVTCMENGWSPTPR	Carbamidomethyl(C)@7; Deamidated(N)@10		1	P08603
sp|P08603|CFAH_HUMAN	AQTTVTCMENGWSPTPR	Carbamidomethyl(C)@7; Deamidated(N)@10		1	P08603
sp|P08603|CFAH_HUMAN	AQTTVTCMENGWSPTPR	Carbamidomethyl(C)@7; Deamidated(N)@10		1	P08603
sp|P08603|CFAH_HUMAN	AQTTVTCMENGWSPTPR	Carbamidomethyl(C)@7; Deamidated(N)@10		1	P08603
sp|P08603|CFAH_HUMAN	AQTTVTCMENGWSPTPR	Carbamidomethyl(C)@7; Deamidated(N)@10		1	P08603
sp|P08603|CFAH_HUMAN	AQTTVTCMENGWSPTPR	Carbamidomethyl(C)@7; Deamidated(N)@10		1	P08603
sp|P08603|CFAH_HUMAN	AQTTVTCMENGWSPTPR	Carbamidomethyl(C)@7; Deamidated(N)@10		1	P08603
sp|P08603|CFAH_HUMAN	AQTTVTCMENGWSPTPR	Carbamidomethyl(C)@7; Deamidated(N)@10		1	P08603
sp|P08603|CFAH_HUMAN	AQTTVTCMENGWSPTPR	Carbamidomethyl(C)@7; Deamidated(N)@10		1	P08603
sp|P08603|CFAH_HUMAN	AQTTVTCMENGWSPTPR	Carbamidomethyl(C)@7; Deamidated(N)@10		1	P08603
sp|P08603|CFAH_HUMAN	AQTTVTCMENGWSPTPR	Carbamidomethyl(C)@7; Deamidated(N)@10		1	P08603
sp|P08603|CFAH_HUMAN	AQTTVTCMENGWSPTPR	Carbamidomethyl(C)@7; Deamidated(N)@10		1	P08603
sp|P08603|CFAH_HUMAN	AQTTVTCMENGWSPTPR	Carbamidomethyl(C)@7; Deamidated(N)@10		1	P08603
sp|P08603|CFAH_HUMAN	AQTTVTCMENGWSPTPR	Carbamidomethyl(C)@7; Deamidated(N)@10		1	P08603
sp|P08603|CFAH_HUMAN	AQTTVTCMENGWSPTPR	Carbamidomethyl(C)@7; Deamidated(N)@10		1	P08603
sp|P08603|CFAH_HUMAN	AQTTVTCMENGWSPTPR	Carbamidomethyl(C)@7; Deamidated(N)@10		1	P08603
sp|P08603|CFAH_HUMAN	AQTTVTCMENGWSPTPR	Carbamidomethyl(C)@7; Deamidated(N)@10		1	P08603
sp|P08603|CFAH_HUMAN	AQTTVTCMENGWSPTPR	Carbamidomethyl(C)@7; Deamidated(N)@10		1	P08603
sp|P08603|CFAH_HUMAN	AQTTVTCMENGWSPTPR	Carbamidomethyl(C)@7; Deamidated(N)@10		1	P08603
sp|P08603|CFAH_HUMAN	AQTTVTCMENGWSPTPR	Carbamidomethyl(C)@7; Deamidated(N)@10		1	P08603
sp|P08603|CFAH_HUMAN	AQTTVTCMENGWSPTPR	Carbamidomethyl(C)@7; Deamidated(N)@10		1	P08603
sp|P08603|CFAH_HUMAN	AQTTVTCMENGWSPTPR	Carbamidomethyl(C)@7; Deamidated(N)@10		1	P08603
sp|P08603|CFAH_HUMAN	AQTTVTCMENGWSPTPR	Carbamidomethyl(C)@7; Deamidated(N)@10		1	P08603
sp|P08603|CFAH_HUMAN	AQTTVTCMENGWSPTPR	Carbamidomethyl(C)@7; Deamidated(N)@10		1	P08603
sp|P08603|CFAH_HUMAN	AQTTVTCMENGWSPTPR	Carbamidomethyl(C)@7; Deamidated(N)@10		1	P08603
sp|P08603|CFAH_HUMAN	AQTTVTCMENGWSPTPR	Carbamidomethyl(C)@7; Deamidated(N)@10		1	P08603
sp|P08603|CFAH_HUMAN	AQTTVTCMENGWSPTPR	Carbamidomethyl(C)@7; Deamidated(N)@10		1	P08603
sp|P08603|CFAH_HUMAN	AQTTVTCMENGWSPTPR	Carbamidomethyl(C)@7; Deamidated(N)@10		1	P08603
sp|P08603|CFAH_HUMAN	AQTTVTCMENGWSPTPR	Carbamidomethyl(C)@7		1	P08603
sp|P08603|CFAH_HUMAN	AQTTVTCMENGWSPTPR	Carbamidomethyl(C)@7		1	P08603
sp|P08603|CFAH_HUMAN	AQTTVTCMENGWSPTPR	Carbamidomethyl(C)@7		1	P08603
sp|P08603|CFAH_HUMAN	AQTTVTCMENGWSPTPR	Carbamidomethyl(C)@7		1	P08603
sp|P08603|CFAH_HUMAN	AQTTVTCMENGWSPTPR	Carbamidomethyl(C)@7		1	P08603
sp|P08603|CFAH_HUMAN	AQTTVTCMENGWSPTPR	Carbamidomethyl(C)@7		1	P08603
sp|P08603|CFAH_HUMAN	AQTTVTCMENGWSPTPR	Carbamidomethyl(C)@7		1	P08603
sp|P08603|CFAH_HUMAN	AQTTVTCMENGWSPTPR	Carbamidomethyl(C)@7		1	P08603
sp|P08603|CFAH_HUMAN	AQTTVTCMENGWSPTPR	Carbamidomethyl(C)@7		1	P08603
sp|P08603|CFAH_HUMAN	AQTTVTCMENGWSPTPR	Carbamidomethyl(C)@7		1	P08603
sp|P08603|CFAH_HUMAN	AQTTVTCMENGWSPTPR	Carbamidomethyl(C)@7		1	P08603
sp|P08603|CFAH_HUMAN	AQTTVTCMENGWSPTPR	Carbamidomethyl(C)@7		1	P08603
sp|P08603|CFAH_HUMAN	AQTTVTCMENGWSPTPR	Carbamidomethyl(C)@7		1	P08603
sp|P08603|CFAH_HUMAN	AQTTVTCMENGWSPTPR	Carbamidomethyl(C)@7		1	P08603
sp|P08603|CFAH_HUMAN	AQTTVTCMENGWSPTPR	Carbamidomethyl(C)@7		1	P08603
sp|P08603|CFAH_HUMAN	AQTTVTCMENGWSPTPR	Carbamidomethyl(C)@7		1	P08603
sp|P08603|CFAH_HUMAN	AQTTVTCMENGWSPTPR	Carbamidomethyl(C)@7		1	P08603
sp|P08603|CFAH_HUMAN	AQTTVTCMENGWSPTPR	Carbamidomethyl(C)@7		1	P08603
sp|P08603|CFAH_HUMAN	AQTTVTCMENGWSPTPR	Carbamidomethyl(C)@7		1	P08603
sp|P08603|CFAH_HUMAN	AQTTVTCMENGWSPTPR	Carbamidomethyl(C)@7; Deamidated(N)@10		1	P08603
sp|P08603|CFAH_HUMAN	AQTTVTCMENGWSPTPR	Carbamidomethyl(C)@7; Deamidated(N)@10		1	P08603
sp|P08603|CFAH_HUMAN	AQTTVTCMENGWSPTPR	Carbamidomethyl(C)@7		1	P08603
sp|P08603|CFAH_HUMAN	AQTTVTCMENGWSPTPR	Carbamidomethyl(C)@7		1	P08603
sp|P08603|CFAH_HUMAN	AQTTVTCMENGWSPTPR	Carbamidomethyl(C)@7		1	P08603
sp|P08603|CFAH_HUMAN	AQTTVTCMENGWSPTPR	Carbamidomethyl(C)@7		1	P08603
sp|P08603|CFAH_HUMAN	AQTTVTCMENGWSPTPR	Carbamidomethyl(C)@7		1	P08603
sp|P08603|CFAH_HUMAN	AQTTVTCMENGWSPTPR	Deamidated(Q)@2; Carbamidomethyl(C)@7; Deamidated(N)@10		1	P08603
sp|P08603|CFAH_HUMAN	AQTTVTCMENGWSPTPR	Carbamidomethyl(C)@7; Deamidated(N)@10		1	P08603
sp|P08603|CFAH_HUMAN	AQTTVTCMENGWSPTPR	Carbamidomethyl(C)@7; Deamidated(N)@10		1	P08603
sp|P08603|CFAH_HUMAN	AQTTVTCMENGWSPTPR	Carbamidomethyl(C)@7		1	P08603
sp|P08603|CFAH_HUMAN	AQTTVTCMENGWSPTPR	Carbamidomethyl(C)@7		1	P08603
sp|P08603|CFAH_HUMAN	AQTTVTCMENGWSPTPR	Deamidated(Q)@2; Carbamidomethyl(C)@7; Deamidated(N)@10		1	P08603
sp|P08603|CFAH_HUMAN	AQTTVTCMENGWSPTPR	Carbamidomethyl(C)@7; Deamidated(N)@10		1	P08603
sp|P08603|CFAH_HUMAN	AQTTVTCMENGWSPTPR	Carbamidomethyl(C)@7; Deamidated(N)@10		1	P08603
sp|P08603|CFAH_HUMAN	AQTTVTCMENGWSPTPR	Carbamidomethyl(C)@7; Deamidated(N)@10		1	P08603
sp|P08603|CFAH_HUMAN	AQTTVTCMENGWSPTPR	Carbamidomethyl(C)@7; Deamidated(N)@10		1	P08603
sp|P08603|CFAH_HUMAN	AQTTVTCMENGWSPTPR	Carbamidomethyl(C)@7; Oxidation(M)@8		1	P08603
sp|P08603|CFAH_HUMAN	AQTTVTCMENGWSPTPR	Carbamidomethyl(C)@7		1	P08603
sp|P08603|CFAH_HUMAN	AQTTVTCMENGWSPTPR	Carbamidomethyl(C)@7		1	P08603
sp|P08603|CFAH_HUMAN	AQTTVTCMENGWSPTPR	Carbamidomethyl(C)@7		1	P08603
sp|P08603|CFAH_HUMAN	AQTTVTCMENGWSPTPR	Carbamidomethyl(C)@7		1	P08603
sp|P08603|CFAH_HUMAN	AQTTVTCMENGWSPTPR	Carbamidomethyl(C)@7		1	P08603
sp|P08603|CFAH_HUMAN	AQTTVTCMENGWSPTPR	Carbamidomethyl(C)@7		1	P08603
sp|P08603|CFAH_HUMAN	AQTTVTCMENGWSPTPR	Carbamidomethyl(C)@7		1	P08603
sp|P08603|CFAH_HUMAN	AQTTVTCMENGWSPTPR	Carbamidomethyl(C)@7		1	P08603
sp|P08603|CFAH_HUMAN	AQTTVTCMENGWSPTPR	Carbamidomethyl(C)@7		1	P08603
sp|P08603|CFAH_HUMAN	AQTTVTCMENGWSPTPR	Carbamidomethyl(C)@7		1	P08603
sp|P08603|CFAH_HUMAN	AQTTVTCMENGWSPTPR	Carbamidomethyl(C)@7		1	P08603
sp|P08603|CFAH_HUMAN	AQTTVTCMENGWSPTPR	Carbamidomethyl(C)@7		1	P08603
sp|P08603|CFAH_HUMAN	AQTTVTCMENGWSPTPR	Carbamidomethyl(C)@7		1	P08603
sp|P08603|CFAH_HUMAN	AQTTVTCMENGWSPTPR	Carbamidomethyl(C)@7		1	P08603
sp|P08603|CFAH_HUMAN	AQTTVTCMENGWSPTPR	Carbamidomethyl(C)@7		1	P08603
sp|P08603|CFAH_HUMAN	AQTTVTCMENGWSPTPR	Carbamidomethyl(C)@7		1	P08603
sp|P08603|CFAH_HUMAN	AQTTVTCMENGWSPTPR	Carbamidomethyl(C)@7		1	P08603
sp|P08603|CFAH_HUMAN	AQTTVTCMENGWSPTPR	Carbamidomethyl(C)@7		1	P08603
sp|P08603|CFAH_HUMAN	AQTTVTCMENGWSPTPR	Carbamidomethyl(C)@7		1	P08603
sp|P08603|CFAH_HUMAN	AQTTVTCMENGWSPTPR	Carbamidomethyl(C)@7		1	P08603
sp|P08603|CFAH_HUMAN	AQTTVTCMENGWSPTPR	Carbamidomethyl(C)@7		1	P08603
sp|P08603|CFAH_HUMAN	AQTTVTCMENGWSPTPR	Carbamidomethyl(C)@7		1	P08603
sp|P08603|CFAH_HUMAN	AQTTVTCMENGWSPTPR	Carbamidomethyl(C)@7; Oxidation(M)@8; Deamidated(N)@10		1	P08603
sp|P08603|CFAH_HUMAN	AQTTVTCMENGWSPTPR	Carbamidomethyl(C)@7; Oxidation(M)@8; Deamidated(N)@10		1	P08603
sp|P08603|CFAH_HUMAN	AQTTVTCMENGWSPTPR	Carbamidomethyl(C)@7; Oxidation(M)@8; Deamidated(N)@10		1	P08603
sp|P08603|CFAH_HUMAN	AQTTVTCMENGWSPTPR	Carbamidomethyl(C)@7; Oxidation(M)@8; Deamidated(N)@10		1	P08603
sp|P08603|CFAH_HUMAN	AQTTVTCMENGWSPTPR	Carbamidomethyl(C)@7; Oxidation(M)@8; Deamidated(N)@10		1	P08603
sp|P08603|CFAH_HUMAN	AQTTVTCMENGWSPTPR	Carbamidomethyl(C)@7; Oxidation(M)@8; Deamidated(N)@10		1	P08603
sp|P08603|CFAH_HUMAN	AQTTVTCMENGWSPTPR	Carbamidomethyl(C)@7; Oxidation(M)@8; Deamidated(N)@10		1	P08603
sp|P08603|CFAH_HUMAN	AQTTVTCMENGWSPTPR	Carbamidomethyl(C)@7; Oxidation(M)@8; Deamidated(N)@10		1	P08603
sp|P08603|CFAH_HUMAN	AQTTVTCMENGWSPTPR	Carbamidomethyl(C)@7; Oxidation(M)@8; Deamidated(N)@10		1	P08603
sp|P08603|CFAH_HUMAN	AQTTVTCMENGWSPTPR	Carbamidomethyl(C)@7; Oxidation(M)@8; Deamidated(N)@10		1	P08603
sp|P08603|CFAH_HUMAN	AQTTVTCMENGWSPTPR	Carbamidomethyl(C)@7; Oxidation(M)@8; Deamidated(N)@10		1	P08603
sp|P08603|CFAH_HUMAN	AQTTVTCMENGWSPTPR	Carbamidomethyl(C)@7; Oxidation(M)@8; Deamidated(N)@10		1	P08603
sp|P08603|CFAH_HUMAN	AQTTVTCMENGWSPTPR	Carbamidomethyl(C)@7; Oxidation(M)@8; Deamidated(N)@10		1	P08603
sp|P08603|CFAH_HUMAN	AQTTVTCMENGWSPTPR	Carbamidomethyl(C)@7; Oxidation(M)@8; Deamidated(N)@10		1	P08603
sp|P08603|CFAH_HUMAN	AQTTVTCMENGWSPTPR	Deamidated(Q)@2; Carbamidomethyl(C)@7; Deamidated(N)@10		1	P08603
sp|P08603|CFAH_HUMAN	AQTTVTCMENGWSPTPR	Carbamidomethyl(C)@7; Oxidation(M)@8; Deamidated(N)@10		1	P08603
sp|P08603|CFAH_HUMAN	AQTTVTCMENGWSPTPR	Carbamidomethyl(C)@7; Deamidated(N)@10		1	P08603
sp|P08603|CFAH_HUMAN	AQTTVTCMENGWSPTPR	Deamidated(Q)@2; Carbamidomethyl(C)@7; Oxidation(M)@8; Deamidated(N)@10		1	P08603
sp|P08603|CFAH_HUMAN	AQTTVTCMENGWSPTPR	Carbamidomethyl(C)@7; Oxidation(M)@8; Deamidated(N)@10		1	P08603
sp|P08603|CFAH_HUMAN	AQTTVTCMENGWSPTPR	Deamidated(Q)@2; Carbamidomethyl(C)@7; Oxidation(M)@8; Deamidated(N)@10		1	P08603
sp|P08603|CFAH_HUMAN	AQTTVTCMENGWSPTPR	Carbamidomethyl(C)@7; Oxidation(M)@8		1	P08603
sp|P08603|CFAH_HUMAN	AQTTVTCMENGWSPTPR	Carbamidomethyl(C)@7; Oxidation(M)@8; Deamidated(N)@10		1	P08603
sp|P08603|CFAH_HUMAN	AQTTVTCMENGWSPTPR	Carbamidomethyl(T)@6; Carbamidomethyl(C)@7; Deamidated(N)@10		1	P08603
sp|P08603|CFAH_HUMAN	AQTTVTCMENGWSPTPR	Carbamidomethyl(C)@7; Carbamidomethyl(E)@9; Deamidated(N)@10		1	P08603
sp|P08603|CFAH_HUMAN	AQTTVTCMENGWSPTPR	Carbamidomethyl(C)@7; Oxidation(M)@8; Deamidated(N)@10; Dioxidation(W)@12		1	P08603
sp|P08603|CFAH_HUMAN	AQTTVTCMENGWSPTPR	Carbamidomethyl(C)@7; Oxidation(M)@8; Deamidated(N)@10		1	P08603
sp|P08603|CFAH_HUMAN	AQTTVTCMENGWSPTPR	Carbamidomethyl(C)@7; Deamidated(N)@10		1	P08603
sp|P08603|CFAH_HUMAN	AQTTVTCMENGWSPTPR	Deamidated(Q)@2; Carbamidomethyl(C)@7; Deamidated(N)@10		1	P08603
sp|P08603|CFAH_HUMAN	AQTTVTCMENGWSPTPR	Deamidated(Q)@2; Carbamidomethyl(C)@7; Ammonia-loss(N)@10		1	P08603
sp|P08603|CFAH_HUMAN	AQTTVTCMENGWSPTPR	Carbamidomethyl(C)@7; Deamidated(N)@10		1	P08603
sp|P08603|CFAH_HUMAN	AQTTVTCMENGWSPTPR	Carbamidomethyl(T)@6; Carbamidomethyl(C)@7; Deamidated(N)@10		1	P08603
sp|P08603|CFAH_HUMAN	AQTTVTCMENGWSPTPR	Carbamidomethyl(T)@4; Carbamidomethyl(C)@7		1	P08603
sp|P08603|CFAH_HUMAN	AQTTVTCMENGWSPTPR	Deamidated(Q)@2; Carbamidomethyl(C)@7; Oxidation(M)@8; Deamidated(N)@10		1	P08603
sp|P08603|CFAH_HUMAN	AQTTVTCMENGWSPTPR	Carbamidomethyl(C)@7; Deamidated(N)@10; Deamidated(R)@17		1	P08603
sp|P08603|CFAH_HUMAN	AQTTVTCMENGWSPTPR	Carbamidomethyl(C)@7; Carbamidomethyl(E)@9; Deamidated(N)@10		1	P08603
sp|P08603|CFAH_HUMAN	AQTTVTCMENGWSPTPR	Deamidated(Q)@2; Carbamidomethyl(C)@7		1	P08603
sp|P08603|CFAH_HUMAN	AQTTVTCMENGWSPTPR	Carbamidomethyl(C)@7; Carbamidomethyl(E)@9		1	P08603
sp|P08603|CFAH_HUMAN	AQTTVTCMENGWSPTPR	Deamidated(Q)@2; Carbamidomethyl(C)@7; Oxidation(M)@8; Deamidated(N)@10		1	P08603
sp|P08603|CFAH_HUMAN	AQTTVTCMENGWSPTPR	Carbamidomethyl(C)@7; Deamidated(N)@10		1	P08603
sp|P08603|CFAH_HUMAN	AQTTVTCMENGWSPTPR	Deamidated(Q)@2; Carbamidomethyl(C)@7; Oxidation(M)@8; Deamidated(N)@10		1	P08603
sp|P08603|CFAH_HUMAN	AVYTCNEGYQLLGEINYR	Carbamidomethyl(C)@5		1	P08603
sp|P08603|CFAH_HUMAN	AVYTCNEGYQLLGEINYR	Carbamidomethyl(C)@5		1	P08603
sp|P08603|CFAH_HUMAN	AVYTCNEGYQLLGEINYR	Carbamidomethyl(C)@5		1	P08603
sp|P08603|CFAH_HUMAN	AVYTCNEGYQLLGEINYR	Carbamidomethyl(C)@5		1	P08603
sp|P08603|CFAH_HUMAN	AVYTCNEGYQLLGEINYR	Carbamidomethyl(C)@5		1	P08603
sp|P08603|CFAH_HUMAN	AVYTCNEGYQLLGEINYR	Carbamidomethyl(C)@5		1	P08603
sp|P08603|CFAH_HUMAN	AVYTCNEGYQLLGEINYR	Carbamidomethyl(C)@5		1	P08603
sp|P08603|CFAH_HUMAN	AVYTCNEGYQLLGEINYR	Carbamidomethyl(C)@5		1	P08603
sp|P08603|CFAH_HUMAN	AVYTCNEGYQLLGEINYR	Carbamidomethyl(C)@5		1	P08603
sp|P08603|CFAH_HUMAN	AVYTCNEGYQLLGEINYR	Carbamidomethyl(C)@5		1	P08603
sp|P08603|CFAH_HUMAN	AVYTCNEGYQLLGEINYR	Carbamidomethyl(C)@5; Deamidated(Q)@10		1	P08603
sp|P08603|CFAH_HUMAN	AVYTCNEGYQLLGEINYR	Carbamidomethyl(C)@5		1	P08603
sp|P08603|CFAH_HUMAN	AVYTCNEGYQLLGEINYR	Carbamidomethyl(C)@5		1	P08603
sp|P08603|CFAH_HUMAN	AVYTCNEGYQLLGEINYR	Carbamidomethyl(C)@5		1	P08603
sp|P08603|CFAH_HUMAN	AVYTCNEGYQLLGEINYR	Carbamidomethyl(C)@5		1	P08603
sp|P08603|CFAH_HUMAN	AVYTCNEGYQLLGEINYR	Carbamidomethyl(C)@5		1	P08603
sp|P08603|CFAH_HUMAN	AVYTCNEGYQLLGEINYR	Carbamidomethyl(C)@5; Deamidated(N)@6		1	P08603
sp|P08603|CFAH_HUMAN	AVYTCNEGYQLLGEINYR	Carbamidomethyl(C)@5; Deamidated(N)@6		1	P08603
sp|P08603|CFAH_HUMAN	AVYTCNEGYQLLGEINYR	Carbamidomethyl(C)@5		1	P08603
sp|P08603|CFAH_HUMAN	AVYTCNEGYQLLGEINYR	Carbamidomethyl(C)@5		1	P08603
sp|P08603|CFAH_HUMAN	CFEGFGIDGPAIAK	Carbamidomethyl(C)@1		1	P08603
sp|P08603|CFAH_HUMAN	CFEGFGIDGPAIAK	Carbamidomethyl(C)@1		1	P08603
sp|P08603|CFAH_HUMAN	CFEGFGIDGPAIAK	Carbamidomethyl(C)@1		1	P08603
sp|P08603|CFAH_HUMAN	CFEGFGIDGPAIAK	Carbamidomethyl(C)@1		1	P08603
sp|P08603|CFAH_HUMAN	CFEGFGIDGPAIAK	Carbamidomethyl(C)@1		1	P08603
sp|P08603|CFAH_HUMAN	CFEGFGIDGPAIAK	Carbamidomethyl(C)@1		1	P08603
sp|P08603|CFAH_HUMAN	CFEGFGIDGPAIAK	Carbamidomethyl(C)@1		1	P08603
sp|P08603|CFAH_HUMAN	CFEGFGIDGPAIAK	Carbamidomethyl(C)@1		1	P08603
sp|P08603|CFAH_HUMAN	CFEGFGIDGPAIAK	Carbamidomethyl(C)@1		1	P08603
sp|P08603|CFAH_HUMAN	CFEGFGIDGPAIAK	Carbamidomethyl(C)@1		1	P08603
sp|P08603|CFAH_HUMAN	CFEGFGIDGPAIAK	Carbamidomethyl(C)@1		1	P08603
sp|P08603|CFAH_HUMAN	CFEGFGIDGPAIAK	Carbamidomethyl(C)@1		1	P08603
sp|P08603|CFAH_HUMAN	CFEGFGIDGPAIAK	Carbamidomethyl(C)@1		1	P08603
sp|P08603|CFAH_HUMAN	CFEGFGIDGPAIAK	Carbamidomethyl(C)@1		1	P08603
sp|P08603|CFAH_HUMAN	CFEGFGIDGPAIAK	Carbamidomethyl(C)@1		1	P08603
sp|P08603|CFAH_HUMAN	CFEGFGIDGPAIAK	Carbamidomethyl(C)@1		1	P08603
sp|P08603|CFAH_HUMAN	CFEGFGIDGPAIAK	Carbamidomethyl(C)@1		1	P08603
sp|P08603|CFAH_HUMAN	CFEGFGIDGPAIAK	Carbamidomethyl(C)@1		1	P08603
sp|P08603|CFAH_HUMAN	CFEGFGIDGPAIAK	Carbamidomethyl(C)@1		1	P08603
sp|P08603|CFAH_HUMAN	CFEGFGIDGPAIAK	Carbamidomethyl(C)@1		1	P08603
sp|P08603|CFAH_HUMAN	CFEGFGIDGPAIAK	Carbamidomethyl(C)@1		1	P08603
sp|P08603|CFAH_HUMAN	CFEGFGIDGPAIAK	Carbamidomethyl(C)@1		1	P08603
sp|P08603|CFAH_HUMAN	CFEGFGIDGPAIAK	Carbamidomethyl(C)@1		1	P08603
sp|P08603|CFAH_HUMAN	CFEGFGIDGPAIAK	Carbamidomethyl(C)@1		1	P08603
sp|P08603|CFAH_HUMAN	CFEGFGIDGPAIAK	Carbamidomethyl(C)@1		1	P08603
sp|P08603|CFAH_HUMAN	CFEGFGIDGPAIAK	Carbamidomethyl(C)@1		1	P08603
sp|P08603|CFAH_HUMAN	CFEGFGIDGPAIAK	Carbamidomethyl(C)@1		1	P08603
sp|P08603|CFAH_HUMAN	CFEGFGIDGPAIAK	Carbamidomethyl(C)@1		1	P08603
sp|P08603|CFAH_HUMAN	CFEGFGIDGPAIAK	Carbamidomethyl(C)@1		1	P08603
sp|P08603|CFAH_HUMAN	CFEGFGIDGPAIAK	Carbamidomethyl(C)@1		1	P08603
sp|P08603|CFAH_HUMAN	CFEGFGIDGPAIAK	Carbamidomethyl(C)@1		1	P08603
sp|P08603|CFAH_HUMAN	CFEGFGIDGPAIAK	Carbamidomethyl(C)@1		1	P08603
sp|P08603|CFAH_HUMAN	CFEGFGIDGPAIAK	Carbamidomethyl(C)@1		1	P08603
sp|P08603|CFAH_HUMAN	CFEGFGIDGPAIAK	Carbamidomethyl(C)@1		1	P08603
sp|P08603|CFAH_HUMAN	CFEGFGIDGPAIAK	Carbamidomethyl(C)@1		1	P08603
sp|P08603|CFAH_HUMAN	CFEGFGIDGPAIAK	Carbamidomethyl(C)@1		1	P08603
sp|P08603|CFAH_HUMAN	CFEGFGIDGPAIAK	Carbamidomethyl(C)@1		1	P08603
sp|P08603|CFAH_HUMAN	CFEGFGIDGPAIAK	Carbamidomethyl(C)@1		1	P08603
sp|P08603|CFAH_HUMAN	CFEGFGIDGPAIAK	Carbamidomethyl(C)@1		1	P08603
sp|P08603|CFAH_HUMAN	CFEGFGIDGPAIAK	Carbamidomethyl(C)@1		1	P08603
sp|P08603|CFAH_HUMAN	CFEGFGIDGPAIAK	Carbamidomethyl(C)@1		1	P08603
sp|P08603|CFAH_HUMAN	CFEGFGIDGPAIAK	Carbamidomethyl(C)@1		1	P08603
sp|P08603|CFAH_HUMAN	CFEGFGIDGPAIAK	Carbamidomethyl(C)@1		1	P08603
sp|P08603|CFAH_HUMAN	CFEGFGIDGPAIAK	Carbamidomethyl(C)@1		1	P08603
sp|P08603|CFAH_HUMAN	CFEGFGIDGPAIAK	Carbamidomethyl(C)@1		1	P08603
sp|P08603|CFAH_HUMAN	CFEGFGIDGPAIAK	Carbamidomethyl(C)@1		1	P08603
sp|P08603|CFAH_HUMAN	CFEGFGIDGPAIAK	Carbamidomethyl(C)@1		1	P08603
sp|P08603|CFAH_HUMAN	CFEGFGIDGPAIAK	Carbamidomethyl(C)@1		1	P08603
sp|P08603|CFAH_HUMAN	CFEGFGIDGPAIAK	Carbamidomethyl(C)@1		1	P08603
sp|P08603|CFAH_HUMAN	CFEGFGIDGPAIAK	Carbamidomethyl(C)@1		1	P08603
sp|P08603|CFAH_HUMAN	CFEGFGIDGPAIAK	Carbamidomethyl(C)@1		1	P08603
sp|P08603|CFAH_HUMAN	CFEGFGIDGPAIAK	Carbamidomethyl(C)@1; Carbamidomethyl(E)@3		1	P08603
sp|P08603|CFAH_HUMAN	CFEGFGIDGPAIAK	Carbamidomethyl(C)@1; Carbamidomethyl(E)@3		1	P08603
sp|P08603|CFAH_HUMAN	CFEGFGIDGPAIAK	Carbamidomethyl(C)@1; Cation:K(E)@3		1	P08603
sp|P08603|CFAH_HUMAN	CFEGFGIDGPAIAK	Carbamidomethyl(C)@1		1	P08603
sp|P08603|CFAH_HUMAN	CFEGFGIDGPAIAK	Carbamidomethyl(C)@1		1	P08603
sp|P08603|CFAH_HUMAN	CFEGFGIDGPAIAK	Carbamidomethyl(C)@1; Cation:K(E)@3		1	P08603
sp|P08603|CFAH_HUMAN	CFEGFGIDGPAIAK	Carbamidomethyl(C)@1		1	P08603
sp|P08603|CFAH_HUMAN	CFEGFGIDGPAIAK	Carbamidomethyl(C)@1		1	P08603
sp|P08603|CFAH_HUMAN	CFEGFGIDGPAIAK	Carbamidomethyl(C)@1; Cation:Na(D)@8		1	P08603
sp|P08603|CFAH_HUMAN	CFEGFGIDGPAIAK	Carbamidomethyl(C)@1		1	P08603
sp|P08603|CFAH_HUMAN	CFEGFGIDGPAIAK	Carbamidomethyl(C)@1		1	P08603
sp|P08603|CFAH_HUMAN	CFEGFGIDGPAIAK	Carbamidomethyl(C)@1; Oxidation(F)@5		1	P08603
sp|P08603|CFAH_HUMAN	CFEGFGIDGPAIAK	Carbamidomethyl(C)@1; Cation:K(E)@3		1	P08603
sp|P08603|CFAH_HUMAN	CFEGFGIDGPAIAK	Carbamidomethyl(C)@1; Cation:K(E)@3		1	P08603
sp|P08603|CFAH_HUMAN	CFEGFGIDGPAIAK	Carbamidomethyl(C)@1; Cation:K(E)@3		1	P08603
sp|P08603|CFAH_HUMAN	CFEGFGIDGPAIAK	Carbamidomethyl(C)@1; Cation:K(D)@8		1	P08603
sp|P08603|CFAH_HUMAN	CGHPGDTPFGTFTLTGGNVFEYGVK	Carbamidomethyl(C)@1	cleaved P-C@N-term	1	P08603
sp|P08603|CFAH_HUMAN	CGPPPPIDNGDITSFPLSVYAPASSVEYQCQNLYQLEGNKR	Carbamidomethyl(C)@1; Carbamidomethyl(C)@30	missed K-R@40	2	P08603, Q03591
sp|P08603|CFAH_HUMAN	CGPPPPIDNGDITSFPLSVYAPASSVEYQCQNLYQLEGNKR	Carbamidomethyl(C)@1; Oxidation(P)@16; Carbamidomethyl(C)@30	missed K-R@40	2	P08603, Q03591
sp|P08603|CFAH_HUMAN	CGPPPPIDNGDITSFPLSVYAPASSVEYQCQNLYQLEGNKR	Carbamidomethyl(C)@1; Oxidation(P)@22; Carbamidomethyl(C)@30; Deamidated(N)@32	missed K-R@40	2	P08603, Q03591
sp|P08603|CFAH_HUMAN	CGPPPPIDNGDITSFPLSVYAPASSVEYQCQNLYQLEGNKR	Carbamidomethyl(C)@1; Deamidated(N)@9; Deamidated(Q)@29; Carbamidomethyl(C)@30	missed K-R@40	2	P08603, Q03591
sp|P08603|CFAH_HUMAN	CGPPPPIDNGDITSFPLSVYAPASSVEYQCQNLYQLEGNKR	Carbamidomethyl(C)@1; Carbamidomethyl(C)@30	missed K-R@40	2	P08603, Q03591
sp|P08603|CFAH_HUMAN	CGPPPPIDNGDITSFPLSVYAPASSVEYQCQNLYQLEGNKR	Carbamidomethyl(C)@1; Carbamidomethyl(C)@30	missed K-R@40	2	P08603, Q03591
sp|P08603|CFAH_HUMAN	CGPPPPIDNGDITSFPLSVYAPASSVEYQCQNLYQLEGNKR	Carbamidomethyl(C)@1; Carbamidomethyl(C)@30	missed K-R@40	2	P08603, Q03591
sp|P08603|CFAH_HUMAN	CGPPPPIDNGDITSFPLSVYAPASSVEYQCQNLYQLEGNKR	Carbamidomethyl(C)@1; Carbamidomethyl(C)@30; Deamidated(Q)@31	missed K-R@40	2	P08603, Q03591
sp|P08603|CFAH_HUMAN	CGPPPPIDNGDITSFPLSVYAPASSVEYQCQNLYQLEGNKR	Carbamidomethyl(C)@1; Ammonia-loss(N)@9; Carbamidomethyl(C)@30	missed K-R@40	2	P08603, Q03591
sp|P08603|CFAH_HUMAN	CGPPPPIDNGDITSFPLSVYAPASSVEYQCQNLYQLEGNKR	Carbamidomethyl(C)@1; Carbamidomethyl(C)@30	missed K-R@40	2	P08603, Q03591
sp|P08603|CFAH_HUMAN	CGPPPPIDNGDITSFPLSVYAPASSVEYQCQNLYQLEGNKR	Carbamidomethyl(C)@1; Deamidated(N)@9; Carbamidomethyl(C)@30; Deamidated(N)@32	missed K-R@40	2	P08603, Q03591
sp|P08603|CFAH_HUMAN	CGPPPPIDNGDITSFPLSVYAPASSVEYQCQNLYQLEGNKR	Carbamidomethyl(C)@1; Deamidated(N)@9; Carbamidomethyl(C)@30	missed K-R@40	2	P08603, Q03591
sp|P08603|CFAH_HUMAN	CGPPPPIDNGDITSFPLSVYAPASSVEYQCQNLYQLEGNKR	Carbamidomethyl(C)@1; Carbamidomethyl(C)@30	missed K-R@40	2	P08603, Q03591
sp|P08603|CFAH_HUMAN	CGPPPPIDNGDITSFPLSVYAPASSVEYQCQNLYQLEGNKR	Carbamidomethyl(C)@1; Deamidated(N)@9; Carbamidomethyl(C)@30; Deamidated(N)@32	missed K-R@40	2	P08603, Q03591
sp|P08603|CFAH_HUMAN	CGPPPPIDNGDITSFPLSVYAPASSVEYQCQNLYQLEGNKR	Carbamidomethyl(C)@1; Deamidated(N)@9; Deamidated(Q)@29; Carbamidomethyl(C)@30; Deamidated(Q)@31	missed K-R@40	2	P08603, Q03591
sp|P08603|CFAH_HUMAN	CKSSNLIILEEHLK	Carbamidomethyl(C)@1	missed K-S@2	1	P08603
sp|P08603|CFAH_HUMAN	CKSSNLIILEEHLK	Carbamidomethyl(C)@1	missed K-S@2	1	P08603
sp|P08603|CFAH_HUMAN	CKSSNLIILEEHLK	Carbamidomethyl(C)@1	missed K-S@2	1	P08603
sp|P08603|CFAH_HUMAN	CKSSNLIILEEHLK	Carbamidomethyl(C)@1	missed K-S@2	1	P08603
sp|P08603|CFAH_HUMAN	CKSSNLIILEEHLK	Carbamidomethyl(C)@1	missed K-S@2	1	P08603
sp|P08603|CFAH_HUMAN	CKSSNLIILEEHLK	Carbamidomethyl(C)@1	missed K-S@2	1	P08603
sp|P08603|CFAH_HUMAN	CKSSNLIILEEHLK	Carbamidomethyl(C)@1	missed K-S@2	1	P08603
sp|P08603|CFAH_HUMAN	CKSSNLIILEEHLK	Carbamidomethyl(C)@1	missed K-S@2	1	P08603
sp|P08603|CFAH_HUMAN	CKSSNLIILEEHLK	Carbamidomethyl(C)@1	missed K-S@2	1	P08603
sp|P08603|CFAH_HUMAN	CKSSNLIILEEHLK	Carbamidomethyl(C)@1	missed K-S@2	1	P08603
sp|P08603|CFAH_HUMAN	CKSSNLIILEEHLK	Carbamidomethyl(C)@1	missed K-S@2	1	P08603
sp|P08603|CFAH_HUMAN	CKSSNLIILEEHLK	Carbamidomethyl(C)@1	missed K-S@2	1	P08603
sp|P08603|CFAH_HUMAN	CKSSNLIILEEHLK	Carbamidomethyl(C)@1	missed K-S@2	1	P08603
sp|P08603|CFAH_HUMAN	CKSSNLIILEEHLK	Carbamidomethyl(C)@1	missed K-S@2	1	P08603
sp|P08603|CFAH_HUMAN	CKSSNLIILEEHLK	Carbamidomethyl(C)@1	missed K-S@2	1	P08603
sp|P08603|CFAH_HUMAN	CKSSNLIILEEHLK	Carbamidomethyl(C)@1	missed K-S@2	1	P08603
sp|P08603|CFAH_HUMAN	CKSSNLIILEEHLK	Carbamidomethyl(C)@1	missed K-S@2	1	P08603
sp|P08603|CFAH_HUMAN	CKSSNLIILEEHLK	Carbamidomethyl(C)@1	missed K-S@2	1	P08603
sp|P08603|CFAH_HUMAN	CKSSNLIILEEHLK	Carbamidomethyl(C)@1	missed K-S@2	1	P08603
sp|P08603|CFAH_HUMAN	CKSSNLIILEEHLK	Carbamidomethyl(C)@1	missed K-S@2	1	P08603
sp|P08603|CFAH_HUMAN	CKSSNLIILEEHLK	Carbamidomethyl(C)@1	missed K-S@2	1	P08603
sp|P08603|CFAH_HUMAN	CKSSNLIILEEHLK	Carbamidomethyl(C)@1	missed K-S@2	1	P08603
sp|P08603|CFAH_HUMAN	CKSSNLIILEEHLK	Carbamidomethyl(C)@1	missed K-S@2	1	P08603
sp|P08603|CFAH_HUMAN	CKSSNLIILEEHLK	Carbamidomethyl(C)@1	missed K-S@2	1	P08603
sp|P08603|CFAH_HUMAN	CKSSNLIILEEHLK	Carbamidomethyl(C)@1	missed K-S@2	1	P08603
sp|P08603|CFAH_HUMAN	CKSSNLIILEEHLK	Carbamidomethyl(C)@1	missed K-S@2	1	P08603
sp|P08603|CFAH_HUMAN	CKSSNLIILEEHLK	Carbamidomethyl(C)@1	missed K-S@2	1	P08603
sp|P08603|CFAH_HUMAN	CKSSNLIILEEHLK	Carbamidomethyl(C)@1	missed K-S@2	1	P08603
sp|P08603|CFAH_HUMAN	CKSSNLIILEEHLK	Carbamidomethyl(C)@1	missed K-S@2	1	P08603
sp|P08603|CFAH_HUMAN	CKSSNLIILEEHLK	Carbamidomethyl(C)@1	missed K-S@2	1	P08603
sp|P08603|CFAH_HUMAN	CKSSNLIILEEHLK	Carbamidomethyl(C)@1	missed K-S@2	1	P08603
sp|P08603|CFAH_HUMAN	CKSSNLIILEEHLK	Carbamidomethyl(C)@1	missed K-S@2	1	P08603
sp|P08603|CFAH_HUMAN	CKSSNLIILEEHLK	Carbamidomethyl(C)@1	missed K-S@2	1	P08603
sp|P08603|CFAH_HUMAN	CKSSNLIILEEHLK	Carbamidomethyl(C)@1	missed K-S@2	1	P08603
sp|P08603|CFAH_HUMAN	CKSSNLIILEEHLK	Carbamidomethyl(C)@1	missed K-S@2	1	P08603
sp|P08603|CFAH_HUMAN	CKSSNLIILEEHLK	Carbamidomethyl(C)@1	missed K-S@2	1	P08603
sp|P08603|CFAH_HUMAN	CKSSNLIILEEHLK	Carbamidomethyl(C)@1	missed K-S@2	1	P08603
sp|P08603|CFAH_HUMAN	CKSSNLIILEEHLK	Carbamidomethyl(C)@1	missed K-S@2	1	P08603
sp|P08603|CFAH_HUMAN	CKSSNLIILEEHLK	Carbamidomethyl(C)@1	missed K-S@2	1	P08603
sp|P08603|CFAH_HUMAN	CKSSNLIILEEHLK	Carbamidomethyl(C)@1; Ammonia-loss(N)@5	missed K-S@2	1	P08603
sp|P08603|CFAH_HUMAN	CKSSNLIILEEHLK	Carbamidomethyl(C)@1; Ammonia-loss(N)@5	missed K-S@2	1	P08603
sp|P08603|CFAH_HUMAN	CKSSNLIILEEHLK	Carbamidomethyl(C)@1	missed K-S@2	1	P08603
sp|P08603|CFAH_HUMAN	CKSSNLIILEEHLK	Carbamidomethyl(C)@1	missed K-S@2	1	P08603
sp|P08603|CFAH_HUMAN	CKSSNLIILEEHLK	Carbamidomethyl(C)@1; Ammonia-loss(N)@5	missed K-S@2	1	P08603
sp|P08603|CFAH_HUMAN	CKSSNLIILEEHLK	Carbamidomethyl(C)@1; Ammonia-loss(N)@5	missed K-S@2	1	P08603
sp|P08603|CFAH_HUMAN	CKSSNLIILEEHLK	Carbamidomethyl(C)@1; Ammonia-loss(N)@5	missed K-S@2	1	P08603
sp|P08603|CFAH_HUMAN	CKSSNLIILEEHLK	Carbamidomethyl(C)@1; Ammonia-loss(N)@5	missed K-S@2	1	P08603
sp|P08603|CFAH_HUMAN	CKSSNLIILEEHLK	Carbamidomethyl(C)@1; Ammonia-loss(N)@5	missed K-S@2	1	P08603
sp|P08603|CFAH_HUMAN	CKSSNLIILEEHLK	Carbamidomethyl(C)@1; Ammonia-loss(N)@5	missed K-S@2	1	P08603
sp|P08603|CFAH_HUMAN	CKSSNLIILEEHLK	Carbamidomethyl(C)@1	missed K-S@2	1	P08603
sp|P08603|CFAH_HUMAN	CKSSNLIILEEHLK	Carbamidomethyl(C)@1	missed K-S@2	1	P08603
sp|P08603|CFAH_HUMAN	CKSSNLIILEEHLK	Carbamidomethyl(C)@1; Dehydrated(S)@4; Deamidated(N)@5	missed K-S@2	1	P08603
sp|P08603|CFAH_HUMAN	CKSSNLIILEEHLK	Carbamidomethyl(C)@1; Ammonia-loss(N)@5	missed K-S@2	1	P08603
sp|P08603|CFAH_HUMAN	CKSSNLIILEEHLK	Carbamidomethyl(C)@1	missed K-S@2	1	P08603
sp|P08603|CFAH_HUMAN	CKSSNLIILEEHLK	Carbamidomethyl(C)@1	missed K-S@2	1	P08603
sp|P08603|CFAH_HUMAN	CKSSNLIILEEHLK	Carbamidomethyl(C)@1; Dehydrated(S)@3; Deamidated(N)@5	missed K-S@2	1	P08603
sp|P08603|CFAH_HUMAN	CKSSNLIILEEHLK	Carbamidomethyl(C)@1; Ammonia-loss(N)@5	missed K-S@2	1	P08603
sp|P08603|CFAH_HUMAN	CKSSNLIILEEHLK	Carbamidomethyl(C)@1	missed K-S@2	1	P08603
sp|P08603|CFAH_HUMAN	CKSSNLIILEEHLK	Carbamidomethyl(C)@1	missed K-S@2	1	P08603
sp|P08603|CFAH_HUMAN	CKSSNLIILEEHLK	Carbamidomethyl(C)@1	missed K-S@2	1	P08603
sp|P08603|CFAH_HUMAN	CKSSNLIILEEHLK	Carbamidomethyl(C)@1	missed K-S@2	1	P08603
sp|P08603|CFAH_HUMAN	CKSSNLIILEEHLK	Carbamidomethyl(C)@1	missed K-S@2	1	P08603
sp|P08603|CFAH_HUMAN	CKSSNLIILEEHLK	Carbamidomethyl(C)@1	missed K-S@2	1	P08603
sp|P08603|CFAH_HUMAN	CKSSNLIILEEHLK	Carbamidomethyl(C)@1; Ammonia-loss(N)@5	missed K-S@2	1	P08603
sp|P08603|CFAH_HUMAN	CKSSNLIILEEHLK	Carbamidomethyl(C)@1; Dehydrated(S)@3; Deamidated(N)@5	missed K-S@2	1	P08603
sp|P08603|CFAH_HUMAN	CKSSNLIILEEHLK	Carbamidomethyl(C)@1; Ammonia-loss(N)@5	missed K-S@2	1	P08603
sp|P08603|CFAH_HUMAN	CKSSNLIILEEHLK	Carbamidomethyl(C)@1	missed K-S@2	1	P08603
sp|P08603|CFAH_HUMAN	CKSSNLIILEEHLK	Carbamidomethyl(C)@1; Ammonia-loss(N)@5	missed K-S@2	1	P08603
sp|P08603|CFAH_HUMAN	CKSSNLIILEEHLK	Carbamidomethyl(C)@1; Deamidated(N)@5	missed K-S@2	1	P08603
sp|P08603|CFAH_HUMAN	CKSSNLIILEEHLK	Carbamidomethyl(C)@1; Ammonia-loss(N)@5	missed K-S@2	1	P08603
sp|P08603|CFAH_HUMAN	CKSSNLIILEEHLK	Carbamidomethyl(C)@1; Ammonia-loss(N)@5	missed K-S@2	1	P08603
sp|P08603|CFAH_HUMAN	CKSSNLIILEEHLK	Carbamidomethyl(C)@1; Dehydrated(S)@4; Deamidated(N)@5	missed K-S@2	1	P08603
sp|P08603|CFAH_HUMAN	CKSSNLIILEEHLK	Carbamidomethyl(C)@1; Ammonia-loss(N)@5	missed K-S@2	1	P08603
sp|P08603|CFAH_HUMAN	CKSSNLIILEEHLK	Carbamidomethyl(C)@1; Ammonia-loss(N)@5	missed K-S@2	1	P08603
sp|P08603|CFAH_HUMAN	CKSSNLIILEEHLK	Carbamidomethyl(C)@1; Ammonia-loss(N)@5	missed K-S@2	1	P08603
sp|P08603|CFAH_HUMAN	CKSSNLIILEEHLK	Carbamidomethyl(C)@1; Ammonia-loss(N)@5	missed K-S@2	1	P08603
sp|P08603|CFAH_HUMAN	CKSSNLIILEEHLK	Carbamidomethyl(C)@1; Ammonia-loss(N)@5	missed K-S@2	1	P08603
sp|P08603|CFAH_HUMAN	CKSSNLIILEEHLK	Carbamidomethyl(C)@1	missed K-S@2	1	P08603
sp|P08603|CFAH_HUMAN	CLGEKWSHPPSCIK	Carbamidomethyl(C)@1; Carbamidomethyl(C)@12	missed K-W@5	1	P08603
sp|P08603|CFAH_HUMAN	CLHPCVISR	Carbamidomethyl(C)@1; Carbamidomethyl(C)@5		2	P08603, Q03591
sp|P08603|CFAH_HUMAN	CLHPCVISR	Carbamidomethyl(C)@1; Carbamidomethyl(C)@5		2	P08603, Q03591
sp|P08603|CFAH_HUMAN	CLHPCVISR	Carbamidomethyl(C)@1; Carbamidomethyl(C)@5		2	P08603, Q03591
sp|P08603|CFAH_HUMAN	CLHPCVISR	Carbamidomethyl(C)@1; Carbamidomethyl(C)@5		2	P08603, Q03591
sp|P08603|CFAH_HUMAN	CLHPCVISR	Carbamidomethyl(C)@1; Carbamidomethyl(C)@5		2	P08603, Q03591
sp|P08603|CFAH_HUMAN	CLHPCVISR	Carbamidomethyl(C)@1; Carbamidomethyl(C)@5		2	P08603, Q03591
sp|P08603|CFAH_HUMAN	CLHPCVISR	Carbamidomethyl(C)@1; Carbamidomethyl(C)@5		2	P08603, Q03591
sp|P08603|CFAH_HUMAN	CLHPCVISR	Carbamidomethyl(C)@1; Carbamidomethyl(C)@5		2	P08603, Q03591
sp|P08603|CFAH_HUMAN	CLHPCVISR	Carbamidomethyl(C)@1; Carbamidomethyl(C)@5		2	P08603, Q03591
sp|P08603|CFAH_HUMAN	CLHPCVISR	Carbamidomethyl(C)@1; Carbamidomethyl(C)@5		2	P08603, Q03591
sp|P08603|CFAH_HUMAN	CLHPCVISR	Carbamidomethyl(C)@1; Carbamidomethyl(C)@5		2	P08603, Q03591
sp|P08603|CFAH_HUMAN	CLHPCVISR	Carbamidomethyl(C)@1; Carbamidomethyl(C)@5		2	P08603, Q03591
sp|P08603|CFAH_HUMAN	CLHPCVISR	Carbamidomethyl(C)@1; Carbamidomethyl(C)@5		2	P08603, Q03591
sp|P08603|CFAH_HUMAN	CLHPCVISR	Carbamidomethyl(C)@1; Carbamidomethyl(C)@5		2	P08603, Q03591
sp|P08603|CFAH_HUMAN	CLHPCVISR	Carbamidomethyl(C)@1; Carbamidomethyl(C)@5		2	P08603, Q03591
sp|P08603|CFAH_HUMAN	CLHPCVISR	Carbamidomethyl(C)@1; Carbamidomethyl(C)@5		2	P08603, Q03591
sp|P08603|CFAH_HUMAN	CLHPCVISR	Carbamidomethyl(C)@1; Carbamidomethyl(C)@5		2	P08603, Q03591
sp|P08603|CFAH_HUMAN	CLHPCVISR	Carbamidomethyl(C)@1; Carbamidomethyl(C)@5		2	P08603, Q03591
sp|P08603|CFAH_HUMAN	CLHPCVISR	Carbamidomethyl(C)@1; Carbamidomethyl(C)@5		2	P08603, Q03591
sp|P08603|CFAH_HUMAN	CLPVTAPENGK	Carbamidomethyl(C)@1; Deamidated(N)@9		1	P08603
sp|P08603|CFAH_HUMAN	CLPVTAPENGK	Carbamidomethyl(C)@1		1	P08603
sp|P08603|CFAH_HUMAN	CLPVTAPENGK	Carbamidomethyl(C)@1; Deamidated(N)@9		1	P08603
sp|P08603|CFAH_HUMAN	CLPVTAPENGK	Carbamidomethyl(C)@1		1	P08603
sp|P08603|CFAH_HUMAN	CLPVTAPENGK	Carbamidomethyl(C)@1; Deamidated(N)@9		1	P08603
sp|P08603|CFAH_HUMAN	CLPVTAPENGK	Carbamidomethyl(C)@1; Deamidated(N)@9		1	P08603
sp|P08603|CFAH_HUMAN	CLPVTAPENGK	Carbamidomethyl(C)@1; Deamidated(N)@9		1	P08603
sp|P08603|CFAH_HUMAN	CLPVTAPENGK	Carbamidomethyl(C)@1		1	P08603
sp|P08603|CFAH_HUMAN	CLPVTAPENGK	Carbamidomethyl(C)@1; Deamidated(N)@9		1	P08603
sp|P08603|CFAH_HUMAN	CLPVTAPENGK	Carbamidomethyl(C)@1		1	P08603
sp|P08603|CFAH_HUMAN	CLPVTAPENGK	Carbamidomethyl(C)@1; Deamidated(N)@9		1	P08603
sp|P08603|CFAH_HUMAN	CLPVTAPENGK	Carbamidomethyl(C)@1; Deamidated(N)@9		1	P08603
sp|P08603|CFAH_HUMAN	CLPVTAPENGK	Carbamidomethyl(C)@1		1	P08603
sp|P08603|CFAH_HUMAN	CLPVTAPENGK	Carbamidomethyl(C)@1; Deamidated(N)@9		1	P08603
sp|P08603|CFAH_HUMAN	CLPVTAPENGKIVSSAMEPDREYHFGQAVR	Carbamidomethyl(C)@1	missed K-I@11; missed R-E@21	1	P08603
sp|P08603|CFAH_HUMAN	CLPVTAPENGKIVSSAMEPDREYHFGQAVR	Carbamidomethyl(C)@1; Deamidated(N)@9	missed K-I@11; missed R-E@21	1	P08603
sp|P08603|CFAH_HUMAN	CLPVTAPENGKIVSSAMEPDREYHFGQAVR	Carbamidomethyl(C)@1; Deamidated(N)@9	missed K-I@11; missed R-E@21	1	P08603
sp|P08603|CFAH_HUMAN	CLPVTAPENGKIVSSAMEPDREYHFGQAVR	Carbamidomethyl(C)@1; Deamidated(N)@9	missed K-I@11; missed R-E@21	1	P08603
sp|P08603|CFAH_HUMAN	CLPVTAPENGKIVSSAMEPDREYHFGQAVR	Carbamidomethyl(C)@1; Deamidated(N)@9	missed K-I@11; missed R-E@21	1	P08603
sp|P08603|CFAH_HUMAN	CLPVTAPENGKIVSSAMEPDREYHFGQAVR	Carbamidomethyl(C)@1; Deamidated(N)@9; Oxidation(M)@17	missed K-I@11; missed R-E@21	1	P08603
sp|P08603|CFAH_HUMAN	CLPVTAPENGKIVSSAMEPDREYHFGQAVR	Carbamidomethyl(C)@1; Deamidated(N)@9	missed K-I@11; missed R-E@21	1	P08603
sp|P08603|CFAH_HUMAN	CLPVTAPENGKIVSSAMEPDREYHFGQAVR	Carbamidomethyl(C)@1	missed K-I@11; missed R-E@21	1	P08603
sp|P08603|CFAH_HUMAN	CLPVTAPENGKIVSSAMEPDREYHFGQAVR	Carbamidomethyl(C)@1; Deamidated(N)@9	missed K-I@11; missed R-E@21	1	P08603
sp|P08603|CFAH_HUMAN	CLPVTAPENGKIVSSAMEPDREYHFGQAVR	Carbamidomethyl(C)@1; Deamidated(N)@9	missed K-I@11; missed R-E@21	1	P08603
sp|P08603|CFAH_HUMAN	CLPVTAPENGKIVSSAMEPDREYHFGQAVR	Carbamidomethyl(C)@1; Oxidation(N)@9; Deamidated(R)@21	missed K-I@11; missed R-E@21	1	P08603
sp|P08603|CFAH_HUMAN	CLPVTAPENGKIVSSAMEPDREYHFGQAVR	Carbamidomethyl(C)@1	missed K-I@11; missed R-E@21	1	P08603
sp|P08603|CFAH_HUMAN	CLPVTAPENGKIVSSAMEPDREYHFGQAVR	Carbamidomethyl(C)@1; Ammonia-loss(N)@9	missed K-I@11; missed R-E@21	1	P08603
sp|P08603|CFAH_HUMAN	CLPVTAPENGKIVSSAMEPDREYHFGQAVR	Carbamidomethyl(C)@1	missed K-I@11; missed R-E@21	1	P08603
sp|P08603|CFAH_HUMAN	CNMGYEYSER	Carbamidomethyl(C)@1		1	P08603
sp|P08603|CFAH_HUMAN	CNMGYEYSER	Carbamidomethyl(C)@1		1	P08603
sp|P08603|CFAH_HUMAN	CNMGYEYSER	Carbamidomethyl(C)@1		1	P08603
sp|P08603|CFAH_HUMAN	CNMGYEYSER	Carbamidomethyl(C)@1; Ammonia-loss(N)@2		1	P08603
sp|P08603|CFAH_HUMAN	CNMGYEYSER	Carbamidomethyl(C)@1; Ammonia-loss(N)@2		1	P08603
sp|P08603|CFAH_HUMAN	CNMGYEYSER	Carbamidomethyl(C)@1; Deamidated(N)@2		1	P08603
sp|P08603|CFAH_HUMAN	CNMGYEYSER	Carbamidomethyl(C)@1		1	P08603
sp|P08603|CFAH_HUMAN	CNMGYEYSER	Carbamidomethyl(C)@1; Deamidated(N)@2		1	P08603
sp|P08603|CFAH_HUMAN	CNMGYEYSERGDAVCTESGWRPLPSCEEK	Carbamidomethyl(C)@1; Ammonia-loss(N)@2; Carbamidomethyl(C)@15; Carbamidomethyl(C)@26	missed R-G@10	1	P08603
sp|P08603|CFAH_HUMAN	CNMGYEYSERGDAVCTESGWRPLPSCEEK	Carbamidomethyl(C)@1; Ammonia-loss(N)@2; Carbamidomethyl(C)@15; Carbamidomethyl(C)@26	missed R-G@10	1	P08603
sp|P08603|CFAH_HUMAN	CNMGYEYSERGDAVCTESGWRPLPSCEEK	Carbamidomethyl(C)@1; Ammonia-loss(N)@2; Carbamidomethyl(C)@15; Deamidated(R)@21; Carbamidomethyl(C)@26	missed R-G@10	1	P08603
sp|P08603|CFAH_HUMAN	CTLKPCDYPDIK	Carbamidomethyl(C)@1; Carbamidomethyl(C)@6		1	P08603
sp|P08603|CFAH_HUMAN	CTLKPCDYPDIK	Carbamidomethyl(C)@1; Carbamidomethyl(C)@6		1	P08603
sp|P08603|CFAH_HUMAN	CTSTGWIPAPR	Carbamidomethyl(C)@1		1	P08603
sp|P08603|CFAH_HUMAN	CTSTGWIPAPR	Carbamidomethyl(C)@1		1	P08603
sp|P08603|CFAH_HUMAN	CTSTGWIPAPR	Carbamidomethyl(C)@1		1	P08603
sp|P08603|CFAH_HUMAN	CTSTGWIPAPR	Carbamidomethyl(C)@1		1	P08603
sp|P08603|CFAH_HUMAN	CTSTGWIPAPR	Carbamidomethyl(C)@1		1	P08603
sp|P08603|CFAH_HUMAN	CTSTGWIPAPR	Carbamidomethyl(C)@1		1	P08603
sp|P08603|CFAH_HUMAN	CTSTGWIPAPR	Carbamidomethyl(C)@1		1	P08603
sp|P08603|CFAH_HUMAN	CTSTGWIPAPR	Carbamidomethyl(C)@1		1	P08603
sp|P08603|CFAH_HUMAN	CTSTGWIPAPR	Carbamidomethyl(C)@1		1	P08603
sp|P08603|CFAH_HUMAN	CTSTGWIPAPR	Carbamidomethyl(C)@1		1	P08603
sp|P08603|CFAH_HUMAN	CTSTGWIPAPR	Carbamidomethyl(C)@1		1	P08603
sp|P08603|CFAH_HUMAN	CTSTGWIPAPR	Carbamidomethyl(C)@1		1	P08603
sp|P08603|CFAH_HUMAN	CVEISCKSPDVINGSPISQK	Carbamidomethyl(C)@1; Carbamidomethyl(C)@6	missed K-S@7	1	P08603
sp|P08603|CFAH_HUMAN	CVEISCKSPDVINGSPISQK	Carbamidomethyl(C)@1; Carbamidomethyl(C)@6	missed K-S@7	1	P08603
sp|P08603|CFAH_HUMAN	CVEISCKSPDVINGSPISQK	Carbamidomethyl(C)@1; Carbamidomethyl(C)@6; Deamidated(N)@13	missed K-S@7	1	P08603
sp|P08603|CFAH_HUMAN	CVEISCKSPDVINGSPISQK	Carbamidomethyl(C)@1; Carbamidomethyl(C)@6; Deamidated(N)@13	missed K-S@7	1	P08603
sp|P08603|CFAH_HUMAN	CVEISCKSPDVINGSPISQK	Carbamidomethyl(C)@1; Carbamidomethyl(C)@6; Deamidated(N)@13	missed K-S@7	1	P08603
sp|P08603|CFAH_HUMAN	CVEISCKSPDVINGSPISQK	Carbamidomethyl(C)@1; Carbamidomethyl(C)@6; Deamidated(N)@13; Deamidated(Q)@19	missed K-S@7	1	P08603
sp|P08603|CFAH_HUMAN	CVEISCKSPDVINGSPISQK	Carbamidomethyl(C)@1; Carbamidomethyl(C)@6; Deamidated(N)@13	missed K-S@7	1	P08603
sp|P08603|CFAH_HUMAN	CVEISCKSPDVINGSPISQK	Carbamidomethyl(C)@1; Carbamidomethyl(C)@6; Deamidated(N)@13	missed K-S@7	1	P08603
sp|P08603|CFAH_HUMAN	CVEISCKSPDVINGSPISQK	Carbamidomethyl(C)@1; Dehydrated(S)@5; Carbamidomethyl(C)@6; Deamidated(N)@13	missed K-S@7	1	P08603
sp|P08603|CFAH_HUMAN	CVEISCKSPDVINGSPISQK	Carbamidomethyl(C)@1; Carbamidomethyl(C)@6; Dehydrated(S)@8; Deamidated(N)@13	missed K-S@7	1	P08603
sp|P08603|CFAH_HUMAN	CVEISCKSPDVINGSPISQK	Carbamidomethyl(C)@1; Carbamidomethyl(C)@6	missed K-S@7	1	P08603
sp|P08603|CFAH_HUMAN	CVEISCKSPDVINGSPISQK	Carbamidomethyl(C)@1; Carbamidomethyl(C)@6	missed K-S@7	1	P08603
sp|P08603|CFAH_HUMAN	CVEISCKSPDVINGSPISQK	Carbamidomethyl(C)@1; Carbamidomethyl(C)@6	missed K-S@7	1	P08603
sp|P08603|CFAH_HUMAN	CVEISCKSPDVINGSPISQK	Carbamidomethyl(C)@1; Carbamidomethyl(C)@6	missed K-S@7	1	P08603
sp|P08603|CFAH_HUMAN	CVEISCKSPDVINGSPISQK	Carbamidomethyl(C)@1; Carbamidomethyl(C)@6	missed K-S@7	1	P08603
sp|P08603|CFAH_HUMAN	CVEISCKSPDVINGSPISQK	Carbamidomethyl(C)@1; Carbamidomethyl(C)@6	missed K-S@7	1	P08603
sp|P08603|CFAH_HUMAN	CVEISCKSPDVINGSPISQK	Carbamidomethyl(C)@1; Carbamidomethyl(C)@6	missed K-S@7	1	P08603
sp|P08603|CFAH_HUMAN	CVEISCKSPDVINGSPISQK	Carbamidomethyl(C)@1; Carbamidomethyl(C)@6	missed K-S@7	1	P08603
sp|P08603|CFAH_HUMAN	CVEISCKSPDVINGSPISQK	Carbamidomethyl(C)@1; Carbamidomethyl(C)@6	missed K-S@7	1	P08603
sp|P08603|CFAH_HUMAN	CVEISCKSPDVINGSPISQK	Carbamidomethyl(C)@1; Carbamidomethyl(C)@6	missed K-S@7	1	P08603
sp|P08603|CFAH_HUMAN	CVEISCKSPDVINGSPISQK	Carbamidomethyl(C)@1; Carbamidomethyl(C)@6; Deamidated(N)@13	missed K-S@7	1	P08603
sp|P08603|CFAH_HUMAN	CVEISCKSPDVINGSPISQK	Carbamidomethyl(C)@1; Carbamidomethyl(C)@6	missed K-S@7	1	P08603
sp|P08603|CFAH_HUMAN	CVEISCKSPDVINGSPISQK	Carbamidomethyl(C)@1; Carbamidomethyl(C)@6; Deamidated(N)@13	missed K-S@7	1	P08603
sp|P08603|CFAH_HUMAN	CVEISCKSPDVINGSPISQK	Carbamidomethyl(C)@1; Carbamidomethyl(C)@6; Deamidated(N)@13	missed K-S@7	1	P08603
sp|P08603|CFAH_HUMAN	CVEISCKSPDVINGSPISQK	Carbamidomethyl(C)@1; Carbamidomethyl(C)@6; Ammonia-loss(N)@13	missed K-S@7	1	P08603
sp|P08603|CFAH_HUMAN	CVEISCKSPDVINGSPISQK	Carbamidomethyl(C)@1; Dehydrated(S)@5; Carbamidomethyl(C)@6; Deamidated(N)@13	missed K-S@7	1	P08603
sp|P08603|CFAH_HUMAN	CVEISCKSPDVINGSPISQK	Carbamidomethyl(C)@1; Carbamidomethyl(C)@6	missed K-S@7	1	P08603
sp|P08603|CFAH_HUMAN	CVEISCKSPDVINGSPISQK	Carbamidomethyl(C)@1; Carbamidomethyl(C)@6; Ammonia-loss(N)@13	missed K-S@7	1	P08603
sp|P08603|CFAH_HUMAN	CYFPYLENGYNQNYGR	Carbamidomethyl(C)@1		2	P08603, Q02985
sp|P08603|CFAH_HUMAN	CYFPYLENGYNQNYGR	Carbamidomethyl(C)@1		2	P08603, Q02985
sp|P08603|CFAH_HUMAN	CYFPYLENGYNQNYGR	Carbamidomethyl(C)@1		2	P08603, Q02985
sp|P08603|CFAH_HUMAN	CYFPYLENGYNQNYGR	Carbamidomethyl(C)@1		2	P08603, Q02985
sp|P08603|CFAH_HUMAN	CYFPYLENGYNQNYGR	Carbamidomethyl(C)@1; Deamidated(N)@13		2	P08603, Q02985
sp|P08603|CFAH_HUMAN	CYFPYLENGYNQNYGR	Carbamidomethyl(C)@1		2	P08603, Q02985
sp|P08603|CFAH_HUMAN	CYFPYLENGYNQNYGR	Carbamidomethyl(C)@1; Ammonia-loss(N)@8		2	P08603, Q02985
sp|P08603|CFAH_HUMAN	CYFPYLENGYNQNYGR	Carbamidomethyl(C)@1; Dehydrated(E)@7; Deamidated(N)@8		2	P08603, Q02985
sp|P08603|CFAH_HUMAN	CYFPYLENGYNQNYGR	Carbamidomethyl(C)@1; Ammonia-loss(N)@8		2	P08603, Q02985
sp|P08603|CFAH_HUMAN	CYFPYLENGYNQNYGR	Carbamidomethyl(C)@1; Deamidated(N)@8		2	P08603, Q02985
sp|P08603|CFAH_HUMAN	CYFPYLENGYNQNYGR	Carbamidomethyl(C)@1; Deamidated(N)@8		2	P08603, Q02985
sp|P08603|CFAH_HUMAN	CYFPYLENGYNQNYGR	Carbamidomethyl(C)@1; Deamidated(N)@8		2	P08603, Q02985
sp|P08603|CFAH_HUMAN	CYFPYLENGYNQNYGR	Carbamidomethyl(C)@1		2	P08603, Q02985
sp|P08603|CFAH_HUMAN	CYFPYLENGYNQNYGR	Carbamidomethyl(C)@1		2	P08603, Q02985
sp|P08603|CFAH_HUMAN	CYFPYLENGYNQNYGR	Carbamidomethyl(C)@1		2	P08603, Q02985
sp|P08603|CFAH_HUMAN	CYFPYLENGYNQNYGR	Carbamidomethyl(C)@1		2	P08603, Q02985
sp|P08603|CFAH_HUMAN	CYFPYLENGYNQNYGR	Carbamidomethyl(C)@1; Dehydrated(Y)@5; Deamidated(N)@8		2	P08603, Q02985
sp|P08603|CFAH_HUMAN	CYFPYLENGYNQNYGR	Carbamidomethyl(C)@1; Deamidated(N)@8		2	P08603, Q02985
sp|P08603|CFAH_HUMAN	CYFPYLENGYNQNYGR	Carbamidomethyl(C)@1		2	P08603, Q02985
sp|P08603|CFAH_HUMAN	CYFPYLENGYNQNYGR	Carbamidomethyl(C)@1; Deamidated(N)@8		2	P08603, Q02985
sp|P08603|CFAH_HUMAN	CYFPYLENGYNQNYGR	Carbamidomethyl(C)@1		2	P08603, Q02985
sp|P08603|CFAH_HUMAN	CYFPYLENGYNQNYGR	Carbamidomethyl(C)@1		2	P08603, Q02985
sp|P08603|CFAH_HUMAN	CYFPYLENGYNQNYGR	Carbamidomethyl(C)@1; Ammonia-loss(N)@8		2	P08603, Q02985
sp|P08603|CFAH_HUMAN	CYFPYLENGYNQNYGR	Carbamidomethyl(C)@1; Deamidated(N)@8; Deamidated(N)@11		2	P08603, Q02985
sp|P08603|CFAH_HUMAN	CYFPYLENGYNQNYGR	Carbamidomethyl(C)@1; Deamidated(N)@8		2	P08603, Q02985
sp|P08603|CFAH_HUMAN	CYFPYLENGYNQNYGR	Carbamidomethyl(C)@1; Ammonia-loss(N)@8		2	P08603, Q02985
sp|P08603|CFAH_HUMAN	CYFPYLENGYNQNYGR	Carbamidomethyl(C)@1; Ammonia-loss(N)@8		2	P08603, Q02985
sp|P08603|CFAH_HUMAN	CYFPYLENGYNQNYGR	Carbamidomethyl(C)@1; Ammonia-loss(N)@8; Deamidated(N)@11		2	P08603, Q02985
sp|P08603|CFAH_HUMAN	CYFPYLENGYNQNYGR	Carbamidomethyl(C)@1		2	P08603, Q02985
sp|P08603|CFAH_HUMAN	CYFPYLENGYNQNYGR	Carbamidomethyl(C)@1; Ammonia-loss(N)@8		2	P08603, Q02985
sp|P08603|CFAH_HUMAN	CYFPYLENGYNQNYGR	Carbamidomethyl(C)@1; Deamidated(N)@8; Ammonia-loss(N)@11		2	P08603, Q02985
sp|P08603|CFAH_HUMAN	CYFPYLENGYNQNYGR	Carbamidomethyl(C)@1		2	P08603, Q02985
sp|P08603|CFAH_HUMAN	CYFPYLENGYNQNYGR	Carbamidomethyl(C)@1; Deamidated(N)@13		2	P08603, Q02985
sp|P08603|CFAH_HUMAN	CYFPYLENGYNQNYGR	Carbamidomethyl(C)@1		2	P08603, Q02985
sp|P08603|CFAH_HUMAN	CYFPYLENGYNQNYGRK	Carbamidomethyl(C)@1; Oxidation(Y)@14; Arg->Orn(R)@16	missed R-K@16	2	P08603, Q02985
sp|P08603|CFAH_HUMAN	CYFPYLENGYNQNYGRK	Carbamidomethyl(C)@1; Deamidated(N)@8	missed R-K@16	2	P08603, Q02985
sp|P08603|CFAH_HUMAN	CYFPYLENGYNQNYGRK	Carbamidomethyl(C)@1	missed R-K@16	2	P08603, Q02985
sp|P08603|CFAH_HUMAN	DGEKVSVLCQENYLIQEGEEITCK	Carbamidomethyl(C)@9; Deamidated(N)@12; Carbamidomethyl(C)@23	missed K-V@4	1	P08603
sp|P08603|CFAH_HUMAN	DGEKVSVLCQENYLIQEGEEITCK	Carbamidomethyl(C)@9; Carbamidomethyl(C)@23	missed K-V@4	1	P08603
sp|P08603|CFAH_HUMAN	DGEKVSVLCQENYLIQEGEEITCK	Carbamidomethyl(C)@9; Carbamidomethyl(C)@23	missed K-V@4	1	P08603
sp|P08603|CFAH_HUMAN	DGEKVSVLCQENYLIQEGEEITCKDGR	Carbamidomethyl(C)@9; Carbamidomethyl(C)@23	missed K-V@4; missed K-D@24	1	P08603
sp|P08603|CFAH_HUMAN	DGEKVSVLCQENYLIQEGEEITCKDGR	Carbamidomethyl(C)@9; Carbamidomethyl(C)@23	missed K-V@4; missed K-D@24	1	P08603
sp|P08603|CFAH_HUMAN	DGEKVSVLCQENYLIQEGEEITCKDGR	Carbamidomethyl(C)@9; Carbamidomethyl(C)@23	missed K-V@4; missed K-D@24	1	P08603
sp|P08603|CFAH_HUMAN	DGEKVSVLCQENYLIQEGEEITCKDGR	Carbamidomethyl(C)@9; Carbamidomethyl(C)@23	missed K-V@4; missed K-D@24	1	P08603
sp|P08603|CFAH_HUMAN	DGEKVSVLCQENYLIQEGEEITCKDGR	Carbamidomethyl(C)@9; Carbamidomethyl(C)@23	missed K-V@4; missed K-D@24	1	P08603
sp|P08603|CFAH_HUMAN	DGEKVSVLCQENYLIQEGEEITCKDGR	Carbamidomethyl(C)@9; Carbamidomethyl(C)@23	missed K-V@4; missed K-D@24	1	P08603
sp|P08603|CFAH_HUMAN	DGEKVSVLCQENYLIQEGEEITCKDGR	Carbamidomethyl(C)@9; Carbamidomethyl(C)@23	missed K-V@4; missed K-D@24	1	P08603
sp|P08603|CFAH_HUMAN	DGEKVSVLCQENYLIQEGEEITCKDGR	Carbamidomethyl(C)@9; Carbamidomethyl(C)@23	missed K-V@4; missed K-D@24	1	P08603
sp|P08603|CFAH_HUMAN	DGEKVSVLCQENYLIQEGEEITCKDGR	Carbamidomethyl(C)@9; Carbamidomethyl(C)@23	missed K-V@4; missed K-D@24	1	P08603
sp|P08603|CFAH_HUMAN	DGEKVSVLCQENYLIQEGEEITCKDGR	Carbamidomethyl(C)@9; Carbamidomethyl(C)@23	missed K-V@4; missed K-D@24	1	P08603
sp|P08603|CFAH_HUMAN	DGEKVSVLCQENYLIQEGEEITCKDGR	Carbamidomethyl(C)@9; Carbamidomethyl(C)@23	missed K-V@4; missed K-D@24	1	P08603
sp|P08603|CFAH_HUMAN	DGEKVSVLCQENYLIQEGEEITCKDGR	Carbamidomethyl(C)@9; Carbamidomethyl(C)@23	missed K-V@4; missed K-D@24	1	P08603
sp|P08603|CFAH_HUMAN	DGEKVSVLCQENYLIQEGEEITCKDGR	Carbamidomethyl(C)@9; Carbamidomethyl(C)@23	missed K-V@4; missed K-D@24	1	P08603
sp|P08603|CFAH_HUMAN	DGEKVSVLCQENYLIQEGEEITCKDGR	Carbamidomethyl(C)@9; Carbamidomethyl(C)@23	missed K-V@4; missed K-D@24	1	P08603
sp|P08603|CFAH_HUMAN	DGEKVSVLCQENYLIQEGEEITCKDGR	Carbamidomethyl(C)@9; Carbamidomethyl(C)@23	missed K-V@4; missed K-D@24	1	P08603
sp|P08603|CFAH_HUMAN	DGEKVSVLCQENYLIQEGEEITCKDGR	Carbamidomethyl(C)@9; Carbamidomethyl(C)@23	missed K-V@4; missed K-D@24	1	P08603
sp|P08603|CFAH_HUMAN	DGEKVSVLCQENYLIQEGEEITCKDGR	Carbamidomethyl(C)@9; Deamidated(N)@12; Carbamidomethyl(C)@23	missed K-V@4; missed K-D@24	1	P08603
sp|P08603|CFAH_HUMAN	DGEKVSVLCQENYLIQEGEEITCKDGR	Carbamidomethyl(C)@9; Deamidated(Q)@16; Carbamidomethyl(C)@23	missed K-V@4; missed K-D@24	1	P08603
sp|P08603|CFAH_HUMAN	DGEKVSVLCQENYLIQEGEEITCKDGR	Carbamidomethyl(C)@9; Carbamidomethyl(C)@23	missed K-V@4; missed K-D@24	1	P08603
sp|P08603|CFAH_HUMAN	DGRWQSIPLCVEK	Carbamidomethyl(C)@10	missed R-W@3	1	P08603
sp|P08603|CFAH_HUMAN	DGRWQSIPLCVEK	Carbamidomethyl(C)@10	missed R-W@3	1	P08603
sp|P08603|CFAH_HUMAN	DGWSAQPTCIK	Carbamidomethyl(C)@9		1	P08603
sp|P08603|CFAH_HUMAN	DGWSAQPTCIK	Carbamidomethyl(C)@9		1	P08603
sp|P08603|CFAH_HUMAN	DGWSAQPTCIK	Carbamidomethyl(C)@9		1	P08603
sp|P08603|CFAH_HUMAN	DGWSAQPTCIK	Carbamidomethyl(C)@9		1	P08603
sp|P08603|CFAH_HUMAN	DGWSAQPTCIK	Carbamidomethyl(C)@9		1	P08603
sp|P08603|CFAH_HUMAN	DGWSAQPTCIK	Carbamidomethyl(C)@9		1	P08603
sp|P08603|CFAH_HUMAN	DGWSAQPTCIK	Carbamidomethyl(C)@9		1	P08603
sp|P08603|CFAH_HUMAN	DGWSAQPTCIK	Carbamidomethyl(C)@9		1	P08603
sp|P08603|CFAH_HUMAN	DGWSAQPTCIK	Carbamidomethyl(C)@9		1	P08603
sp|P08603|CFAH_HUMAN	DGWSAQPTCIK	Carbamidomethyl(C)@9		1	P08603
sp|P08603|CFAH_HUMAN	DGWSAQPTCIK	Carbamidomethyl(C)@9		1	P08603
sp|P08603|CFAH_HUMAN	DGWSAQPTCIK	Carbamidomethyl(C)@9		1	P08603
sp|P08603|CFAH_HUMAN	DGWSAQPTCIK	Carbamidomethyl(C)@9		1	P08603
sp|P08603|CFAH_HUMAN	DGWSAQPTCIK	Deamidated(Q)@6; Carbamidomethyl(C)@9		1	P08603
sp|P08603|CFAH_HUMAN	DGWSAQPTCIK	Oxidation(W)@3; Carbamidomethyl(C)@9		1	P08603
sp|P08603|CFAH_HUMAN	DGWSAQPTCIK	Carbamidomethyl(C)@9		1	P08603
sp|P08603|CFAH_HUMAN	DIPICEVVK	Carbamidomethyl(C)@5	cleaved N-D@N-term	1	P08603
sp|P08603|CFAH_HUMAN	DQYKVGEVLK		missed K-V@4	1	P08603
sp|P08603|CFAH_HUMAN	DQYKVGEVLK		missed K-V@4	1	P08603
sp|P08603|CFAH_HUMAN	DQYKVGEVLK		missed K-V@4	1	P08603
sp|P08603|CFAH_HUMAN	DQYKVGEVLK	Deamidated(Q)@2	missed K-V@4	1	P08603
sp|P08603|CFAH_HUMAN	DSTGKCGPPPPIDNGDITSFPLSVYAPASSVEYQCQNLYQLEGNKR	Carbamidomethyl(C)@6; Deamidated(N)@14; Carbamidomethyl(C)@35	missed K-C@5; missed K-R@45	2	P08603, Q03591
sp|P08603|CFAH_HUMAN	DTSCVNPPTVQNAY	Carbamidomethyl(C)@4	cleaved Y-I@C-term	2	P08603, Q03591
sp|P08603|CFAH_HUMAN	DTSCVNPPTVQNAY	Carbamidomethyl(C)@4	cleaved Y-I@C-term	2	P08603, Q03591
sp|P08603|CFAH_HUMAN	DTSCVNPPTVQNAYIVSR	Carbamidomethyl(C)@4; Deamidated(N)@12		1	P08603
sp|P08603|CFAH_HUMAN	DTSCVNPPTVQNAYIVSR	Carbamidomethyl(C)@4; Deamidated(N)@12		1	P08603
sp|P08603|CFAH_HUMAN	DTSCVNPPTVQNAYIVSR	Carbamidomethyl(C)@4; Deamidated(N)@12		1	P08603
sp|P08603|CFAH_HUMAN	DTSCVNPPTVQNAYIVSR	Carbamidomethyl(C)@4; Deamidated(N)@12		1	P08603
sp|P08603|CFAH_HUMAN	DTSCVNPPTVQNAYIVSR	Carbamidomethyl(C)@4; Deamidated(N)@12		1	P08603
sp|P08603|CFAH_HUMAN	DTSCVNPPTVQNAYIVSR	Carbamidomethyl(C)@4		1	P08603
sp|P08603|CFAH_HUMAN	DTSCVNPPTVQNAYIVSR	Carbamidomethyl(C)@4		1	P08603
sp|P08603|CFAH_HUMAN	DTSCVNPPTVQNAYIVSR	Carbamidomethyl(C)@4		1	P08603
sp|P08603|CFAH_HUMAN	DTSCVNPPTVQNAYIVSR	Carbamidomethyl(C)@4		1	P08603
sp|P08603|CFAH_HUMAN	DTSCVNPPTVQNAYIVSR	Carbamidomethyl(C)@4		1	P08603
sp|P08603|CFAH_HUMAN	DTSCVNPPTVQNAYIVSR	Carbamidomethyl(C)@4		1	P08603
sp|P08603|CFAH_HUMAN	DTSCVNPPTVQNAYIVSR	Carbamidomethyl(C)@4		1	P08603
sp|P08603|CFAH_HUMAN	DTSCVNPPTVQNAYIVSR	Carbamidomethyl(C)@4		1	P08603
sp|P08603|CFAH_HUMAN	DTSCVNPPTVQNAYIVSR	Carbamidomethyl(C)@4		1	P08603
sp|P08603|CFAH_HUMAN	DTSCVNPPTVQNAYIVSR	Carbamidomethyl(C)@4		1	P08603
sp|P08603|CFAH_HUMAN	DTSCVNPPTVQNAYIVSR	Carbamidomethyl(C)@4		1	P08603
sp|P08603|CFAH_HUMAN	DTSCVNPPTVQNAYIVSR	Carbamidomethyl(C)@4		1	P08603
sp|P08603|CFAH_HUMAN	DTSCVNPPTVQNAYIVSR	Carbamidomethyl(C)@4		1	P08603
sp|P08603|CFAH_HUMAN	DTSCVNPPTVQNAYIVSR	Carbamidomethyl(C)@4		1	P08603
sp|P08603|CFAH_HUMAN	DTSCVNPPTVQNAYIVSR	Carbamidomethyl(C)@4		1	P08603
sp|P08603|CFAH_HUMAN	DTSCVNPPTVQNAYIVSR	Carbamidomethyl(C)@4		1	P08603
sp|P08603|CFAH_HUMAN	DTSCVNPPTVQNAYIVSR	Carbamidomethyl(C)@4		1	P08603
sp|P08603|CFAH_HUMAN	DTSCVNPPTVQNAYIVSR	Carbamidomethyl(C)@4		1	P08603
sp|P08603|CFAH_HUMAN	DTSCVNPPTVQNAYIVSR	Carbamidomethyl(C)@4		1	P08603
sp|P08603|CFAH_HUMAN	DTSCVNPPTVQNAYIVSR	Carbamidomethyl(C)@4		1	P08603
sp|P08603|CFAH_HUMAN	DTSCVNPPTVQNAYIVSR	Carbamidomethyl(C)@4		1	P08603
sp|P08603|CFAH_HUMAN	DTSCVNPPTVQNAYIVSR	Carbamidomethyl(C)@4		1	P08603
sp|P08603|CFAH_HUMAN	DTSCVNPPTVQNAYIVSR	Carbamidomethyl(C)@4		1	P08603
sp|P08603|CFAH_HUMAN	DTSCVNPPTVQNAYIVSR	Carbamidomethyl(C)@4		1	P08603
sp|P08603|CFAH_HUMAN	DTSCVNPPTVQNAYIVSR	Carbamidomethyl(C)@4		1	P08603
sp|P08603|CFAH_HUMAN	DTSCVNPPTVQNAYIVSR	Carbamidomethyl(C)@4; Deamidated(N)@12		1	P08603
sp|P08603|CFAH_HUMAN	DTSCVNPPTVQNAYIVSR	Carbamidomethyl(C)@4		1	P08603
sp|P08603|CFAH_HUMAN	DTSCVNPPTVQNAYIVSR	Carbamidomethyl(C)@4		1	P08603
sp|P08603|CFAH_HUMAN	DTSCVNPPTVQNAYIVSR	Carbamidomethyl(C)@4		1	P08603
sp|P08603|CFAH_HUMAN	DTSCVNPPTVQNAYIVSR	Carbamidomethyl(C)@4		1	P08603
sp|P08603|CFAH_HUMAN	DTSCVNPPTVQNAYIVSR	Carbamidomethyl(C)@4		1	P08603
sp|P08603|CFAH_HUMAN	DTSCVNPPTVQNAYIVSR	Carbamidomethyl(C)@4		1	P08603
sp|P08603|CFAH_HUMAN	DTSCVNPPTVQNAYIVSR	Carbamidomethyl(C)@4		1	P08603
sp|P08603|CFAH_HUMAN	DTSCVNPPTVQNAYIVSR	Carbamidomethyl(C)@4		1	P08603
sp|P08603|CFAH_HUMAN	DTSCVNPPTVQNAYIVSR	Carbamidomethyl(C)@4		1	P08603
sp|P08603|CFAH_HUMAN	DTSCVNPPTVQNAYIVSR	Carbamidomethyl(C)@4		1	P08603
sp|P08603|CFAH_HUMAN	DTSCVNPPTVQNAYIVSR	Carbamidomethyl(C)@4		1	P08603
sp|P08603|CFAH_HUMAN	DTSCVNPPTVQNAYIVSR	Carbamidomethyl(C)@4		1	P08603
sp|P08603|CFAH_HUMAN	DTSCVNPPTVQNAYIVSR	Carbamidomethyl(C)@4; Deamidated(Q)@11; Deamidated(N)@12		1	P08603
sp|P08603|CFAH_HUMAN	DTSCVNPPTVQNAYIVSR	Carbamidomethyl(C)@4; Deamidated(N)@6; Deamidated(N)@12		1	P08603
sp|P08603|CFAH_HUMAN	DTSCVNPPTVQNAYIVSR	Carbamidomethyl(C)@4		1	P08603
sp|P08603|CFAH_HUMAN	DTSCVNPPTVQNAYIVSR	Carbamidomethyl(C)@4		1	P08603
sp|P08603|CFAH_HUMAN	DTSCVNPPTVQNAYIVSR	Carbamidomethyl(C)@4; Deamidated(N)@6; Deamidated(Q)@11		1	P08603
sp|P08603|CFAH_HUMAN	DTSCVNPPTVQNAYIVSR	Carbamidomethyl(C)@4; Deamidated(Q)@11		1	P08603
sp|P08603|CFAH_HUMAN	DTSCVNPPTVQNAYIVSR	Carbamidomethyl(C)@4		1	P08603
sp|P08603|CFAH_HUMAN	DTSCVNPPTVQNAYIVSR	Carbamidomethyl(C)@4; Deamidated(N)@6		1	P08603
sp|P08603|CFAH_HUMAN	DTSCVNPPTVQNAYIVSR	Carbamidomethyl(C)@4		1	P08603
sp|P08603|CFAH_HUMAN	DTSCVNPPTVQNAYIVSR	Carbamidomethyl(C)@4; Deamidated(N)@6		1	P08603
sp|P08603|CFAH_HUMAN	DTSCVNPPTVQNAYIVSR	Carbamidomethyl(C)@4		1	P08603
sp|P08603|CFAH_HUMAN	DTSCVNPPTVQNAYIVSR	Carbamidomethyl(C)@4		1	P08603
sp|P08603|CFAH_HUMAN	DTSCVNPPTVQNAYIVSR	Carbamidomethyl(C)@4		1	P08603
sp|P08603|CFAH_HUMAN	DTSCVNPPTVQNAYIVSR	Carbamidomethyl(C)@4		1	P08603
sp|P08603|CFAH_HUMAN	DTSCVNPPTVQNAYIVSR	Carbamidomethyl(C)@4		1	P08603
sp|P08603|CFAH_HUMAN	DTSCVNPPTVQNAYIVSR	Carbamidomethyl(C)@4; Deamidated(N)@6		1	P08603
sp|P08603|CFAH_HUMAN	DTSCVNPPTVQNAYIVSR	Carbamidomethyl(C)@4; Deamidated(N)@6; Deamidated(N)@12		1	P08603
sp|P08603|CFAH_HUMAN	DTSCVNPPTVQNAYIVSR	Carbamidomethyl(C)@4		1	P08603
sp|P08603|CFAH_HUMAN	DVACHPGYALPK	Carbamidomethyl(C)@4	cleaved I-D@N-term	1	P08603
sp|P08603|CFAH_HUMAN	DVACHPGYALPK	Carbamidomethyl(C)@4	cleaved I-D@N-term	1	P08603
sp|P08603|CFAH_HUMAN	DVACHPGYALPK	Carbamidomethyl(C)@4	cleaved I-D@N-term	1	P08603
sp|P08603|CFAH_HUMAN	DVINGSPISQK	Deamidated(N)@4	cleaved P-D@N-term	1	P08603
sp|P08603|CFAH_HUMAN	DVINGSPISQK		cleaved P-D@N-term	1	P08603
sp|P08603|CFAH_HUMAN	DVINGSPISQK		cleaved P-D@N-term	1	P08603
sp|P08603|CFAH_HUMAN	DVYKAGEQVTYTCATYYK	Carbamidomethyl(C)@13	missed K-A@4	1	P08603
sp|P08603|CFAH_HUMAN	DVYKAGEQVTYTCATYYK	Carbamidomethyl(C)@13	missed K-A@4	1	P08603
sp|P08603|CFAH_HUMAN	DVYKAGEQVTYTCATYYK	Carbamidomethyl(C)@13	missed K-A@4	1	P08603
sp|P08603|CFAH_HUMAN	DVYKAGEQVTYTCATYYK	Carbamidomethyl(C)@13	missed K-A@4	1	P08603
sp|P08603|CFAH_HUMAN	DVYKAGEQVTYTCATYYK	Carbamidomethyl(C)@13	missed K-A@4	1	P08603
sp|P08603|CFAH_HUMAN	DVYKAGEQVTYTCATYYK	Carbamidomethyl(C)@13	missed K-A@4	1	P08603
sp|P08603|CFAH_HUMAN	DVYKAGEQVTYTCATYYK	Deamidated(Q)@8; Carbamidomethyl(C)@13	missed K-A@4	1	P08603
sp|P08603|CFAH_HUMAN	DVYKAGEQVTYTCATYYK	Carbamidomethyl(C)@13	missed K-A@4	1	P08603
sp|P08603|CFAH_HUMAN	ECDTDGWTNDIPICEVVK	Carbamidomethyl(C)@2; Oxidation(W)@7; Carbamidomethyl(C)@14		1	P08603
sp|P08603|CFAH_HUMAN	ECDTDGWTNDIPICEVVK	Carbamidomethyl(C)@2; Oxidation(W)@7; Carbamidomethyl(C)@14		1	P08603
sp|P08603|CFAH_HUMAN	ECDTDGWTNDIPICEVVK	Carbamidomethyl(C)@2; Carbamidomethyl(C)@14		1	P08603
sp|P08603|CFAH_HUMAN	ECDTDGWTNDIPICEVVK	Carbamidomethyl(C)@2; Carbamidomethyl(C)@14		1	P08603
sp|P08603|CFAH_HUMAN	ECDTDGWTNDIPICEVVK	Carbamidomethyl(C)@2; Deamidated(N)@9; Carbamidomethyl(C)@14		1	P08603
sp|P08603|CFAH_HUMAN	ECDTDGWTNDIPICEVVK	Carbamidomethyl(C)@2; Carbamidomethyl(C)@14		1	P08603
sp|P08603|CFAH_HUMAN	ECDTDGWTNDIPICEVVK	Carbamidomethyl(C)@2; Carbamidomethyl(C)@14		1	P08603
sp|P08603|CFAH_HUMAN	ECDTDGWTNDIPICEVVK	Carbamidomethyl(C)@2; Carbamidomethyl(C)@14		1	P08603
sp|P08603|CFAH_HUMAN	ECDTDGWTNDIPICEVVK	Carbamidomethyl(C)@2; Carbamidomethyl(C)@14		1	P08603
sp|P08603|CFAH_HUMAN	ECDTDGWTNDIPICEVVK	Carbamidomethyl(C)@2; Dioxidation(W)@7; Carbamidomethyl(C)@14		1	P08603
sp|P08603|CFAH_HUMAN	ECDTDGWTNDIPICEVVK	Carbamidomethyl(C)@2; Carbamidomethyl(C)@14		1	P08603
sp|P08603|CFAH_HUMAN	ECDTDGWTNDIPICEVVK	Carbamidomethyl(C)@2; Carbamidomethyl(C)@14		1	P08603
sp|P08603|CFAH_HUMAN	ECDTDGWTNDIPICEVVK	Carbamidomethyl(C)@2; Carbamidomethyl(C)@14		1	P08603
sp|P08603|CFAH_HUMAN	ECDTDGWTNDIPICEVVK	Carbamidomethyl(C)@2; Carbamidomethyl(C)@14		1	P08603
sp|P08603|CFAH_HUMAN	ECDTDGWTNDIPICEVVK	Carbamidomethyl(C)@2; Carbamidomethyl(C)@14		1	P08603
sp|P08603|CFAH_HUMAN	ECDTDGWTNDIPICEVVK	Carbamidomethyl(C)@2; Carbamidomethyl(C)@14		1	P08603
sp|P08603|CFAH_HUMAN	ECDTDGWTNDIPICEVVK	Carbamidomethyl(C)@2; Dioxidation(W)@7; Carbamidomethyl(C)@14		1	P08603
sp|P08603|CFAH_HUMAN	ECDTDGWTNDIPICEVVK	Carbamidomethyl(C)@2; Cation:K(D)@10; Carbamidomethyl(C)@14		1	P08603
sp|P08603|CFAH_HUMAN	ECELPKIDVHLVPDR	Carbamidomethyl(C)@2	missed K-I@6	1	P08603
sp|P08603|CFAH_HUMAN	ECELPKIDVHLVPDR	Carbamidomethyl(C)@2	missed K-I@6	1	P08603
sp|P08603|CFAH_HUMAN	ECELPKIDVHLVPDR	Carbamidomethyl(C)@2	missed K-I@6	1	P08603
sp|P08603|CFAH_HUMAN	ECELPKIDVHLVPDR	Carbamidomethyl(C)@2	missed K-I@6	1	P08603
sp|P08603|CFAH_HUMAN	ECELPKIDVHLVPDR	Carbamidomethyl(C)@2	missed K-I@6	1	P08603
sp|P08603|CFAH_HUMAN	ECELPKIDVHLVPDR	Carbamidomethyl(C)@2	missed K-I@6	1	P08603
sp|P08603|CFAH_HUMAN	ECELPKIDVHLVPDR	Carbamidomethyl(C)@2	missed K-I@6	1	P08603
sp|P08603|CFAH_HUMAN	ECELPKIDVHLVPDR	Carbamidomethyl(C)@2	missed K-I@6	1	P08603
sp|P08603|CFAH_HUMAN	ECELPKIDVHLVPDR	Carbamidomethyl(C)@2	missed K-I@6	1	P08603
sp|P08603|CFAH_HUMAN	ECELPKIDVHLVPDR	Carbamidomethyl(C)@2	missed K-I@6	1	P08603
sp|P08603|CFAH_HUMAN	ECELPKIDVHLVPDR	Carbamidomethyl(C)@2	missed K-I@6	1	P08603
sp|P08603|CFAH_HUMAN	ECELPKIDVHLVPDR	Carbamidomethyl(C)@2	missed K-I@6	1	P08603
sp|P08603|CFAH_HUMAN	ECELPKIDVHLVPDR	Carbamidomethyl(C)@2	missed K-I@6	1	P08603
sp|P08603|CFAH_HUMAN	ECELPKIDVHLVPDR	Carbamidomethyl(C)@2	missed K-I@6	1	P08603
sp|P08603|CFAH_HUMAN	ECELPKIDVHLVPDR	Carbamidomethyl(C)@2	missed K-I@6	1	P08603
sp|P08603|CFAH_HUMAN	ECELPKIDVHLVPDR	Carbamidomethyl(C)@2	missed K-I@6	1	P08603
sp|P08603|CFAH_HUMAN	ECELPKIDVHLVPDR	Carbamidomethyl(C)@2	missed K-I@6	1	P08603
sp|P08603|CFAH_HUMAN	ECELPKIDVHLVPDR	Carbamidomethyl(C)@2	missed K-I@6	1	P08603
sp|P08603|CFAH_HUMAN	ECELPKIDVHLVPDR	Carbamidomethyl(C)@2	missed K-I@6	1	P08603
sp|P08603|CFAH_HUMAN	ECELPKIDVHLVPDR	Carbamidomethyl(C)@2	missed K-I@6	1	P08603
sp|P08603|CFAH_HUMAN	ECELPKIDVHLVPDR	Carbamidomethyl(C)@2	missed K-I@6	1	P08603
sp|P08603|CFAH_HUMAN	ECELPKIDVHLVPDR	Carbamidomethyl(C)@2	missed K-I@6	1	P08603
sp|P08603|CFAH_HUMAN	ECELPKIDVHLVPDR	Carbamidomethyl(C)@2	missed K-I@6	1	P08603
sp|P08603|CFAH_HUMAN	ECELPKIDVHLVPDR	Carbamidomethyl(C)@2	missed K-I@6	1	P08603
sp|P08603|CFAH_HUMAN	ECELPKIDVHLVPDR	Carbamidomethyl(C)@2	missed K-I@6	1	P08603
sp|P08603|CFAH_HUMAN	ECELPKIDVHLVPDR	Carbamidomethyl(C)@2	missed K-I@6	1	P08603
sp|P08603|CFAH_HUMAN	ECELPKIDVHLVPDR	Carbamidomethyl(C)@2	missed K-I@6	1	P08603
sp|P08603|CFAH_HUMAN	ECELPKIDVHLVPDR	Carbamidomethyl(C)@2	missed K-I@6	1	P08603
sp|P08603|CFAH_HUMAN	ECELPKIDVHLVPDR	Carbamidomethyl(C)@2	missed K-I@6	1	P08603
sp|P08603|CFAH_HUMAN	ECELPKIDVHLVPDR	Carbamidomethyl(C)@2	missed K-I@6	1	P08603
sp|P08603|CFAH_HUMAN	ECELPKIDVHLVPDR	Carbamidomethyl(C)@2	missed K-I@6	1	P08603
sp|P08603|CFAH_HUMAN	ECELPKIDVHLVPDR	Carbamidomethyl(C)@2	missed K-I@6	1	P08603
sp|P08603|CFAH_HUMAN	ECELPKIDVHLVPDR	Carbamidomethyl(C)@2	missed K-I@6	1	P08603
sp|P08603|CFAH_HUMAN	ECELPKIDVHLVPDR	Carbamidomethyl(C)@2	missed K-I@6	1	P08603
sp|P08603|CFAH_HUMAN	ECELPKIDVHLVPDRK	Carbamidomethyl(C)@2	missed K-I@6; missed R-K@15	1	P08603
sp|P08603|CFAH_HUMAN	ECELPKIDVHLVPDRK	Carbamidomethyl(C)@2	missed K-I@6; missed R-K@15	1	P08603
sp|P08603|CFAH_HUMAN	ECELPKIDVHLVPDRK	Carbamidomethyl(C)@2	missed K-I@6; missed R-K@15	1	P08603
sp|P08603|CFAH_HUMAN	ECELPKIDVHLVPDRK	Carbamidomethyl(C)@2	missed K-I@6; missed R-K@15	1	P08603
sp|P08603|CFAH_HUMAN	EDCNELPPR	Carbamidomethyl(C)@3	cleaved A-E@N-term	1	P08603
sp|P08603|CFAH_HUMAN	EDCNELPPR	Carbamidomethyl(C)@3	cleaved A-E@N-term	1	P08603
sp|P08603|CFAH_HUMAN	EDCNELPPR	Carbamidomethyl(C)@3	cleaved A-E@N-term	1	P08603
sp|P08603|CFAH_HUMAN	EDCNELPPR	Carbamidomethyl(C)@3	cleaved A-E@N-term	1	P08603
sp|P08603|CFAH_HUMAN	EDCNELPPR	Carbamidomethyl(C)@3	cleaved A-E@N-term	1	P08603
sp|P08603|CFAH_HUMAN	EDCNELPPR	Carbamidomethyl(C)@3	cleaved A-E@N-term	1	P08603
sp|P08603|CFAH_HUMAN	EDCNELPPR	Carbamidomethyl(C)@3	cleaved A-E@N-term	1	P08603
sp|P08603|CFAH_HUMAN	EDCNELPPR	Carbamidomethyl(C)@3	cleaved A-E@N-term	1	P08603
sp|P08603|CFAH_HUMAN	EDCNELPPR	Carbamidomethyl(C)@3	cleaved A-E@N-term	1	P08603
sp|P08603|CFAH_HUMAN	EDCNELPPR	Carbamidomethyl(C)@3	cleaved A-E@N-term	1	P08603
sp|P08603|CFAH_HUMAN	EDCNELPPR	Carbamidomethyl(C)@3	cleaved A-E@N-term	1	P08603
sp|P08603|CFAH_HUMAN	EDCNELPPR	Carbamidomethyl(C)@3	cleaved A-E@N-term	1	P08603
sp|P08603|CFAH_HUMAN	EDCNELPPR	Carbamidomethyl(C)@3	cleaved A-E@N-term	1	P08603
sp|P08603|CFAH_HUMAN	EDCNELPPR	Carbamidomethyl(C)@3	cleaved A-E@N-term	1	P08603
sp|P08603|CFAH_HUMAN	EDCNELPPR	Carbamidomethyl(C)@3	cleaved A-E@N-term	1	P08603
sp|P08603|CFAH_HUMAN	EDCNELPPR	Carbamidomethyl(C)@3	cleaved A-E@N-term	1	P08603
sp|P08603|CFAH_HUMAN	EDCNELPPR	Carbamidomethyl(C)@3	cleaved A-E@N-term	1	P08603
sp|P08603|CFAH_HUMAN	EDCNELPPR	Carbamidomethyl(C)@3; Deamidated(N)@4	cleaved A-E@N-term	1	P08603
sp|P08603|CFAH_HUMAN	EDCNELPPR	Carbamidomethyl(C)@3	cleaved A-E@N-term	1	P08603
sp|P08603|CFAH_HUMAN	EDCNELPPR	Carbamidomethyl(C)@3	cleaved A-E@N-term	1	P08603
sp|P08603|CFAH_HUMAN	EDCNELPPR	Carbamidomethyl(C)@3	cleaved A-E@N-term	1	P08603
sp|P08603|CFAH_HUMAN	EDCNELPPR	Carbamidomethyl(C)@3	cleaved A-E@N-term	1	P08603
sp|P08603|CFAH_HUMAN	EDCNELPPR	Carbamidomethyl(C)@3	cleaved A-E@N-term	1	P08603
sp|P08603|CFAH_HUMAN	EDCNELPPR	Carbamidomethyl(C)@3	cleaved A-E@N-term	1	P08603
sp|P08603|CFAH_HUMAN	EDCNELPPR	Carbamidomethyl(C)@3	cleaved A-E@N-term	1	P08603
sp|P08603|CFAH_HUMAN	EDCNELPPR	Carbamidomethyl(C)@3	cleaved A-E@N-term	1	P08603
sp|P08603|CFAH_HUMAN	EDCNELPPR	Carbamidomethyl(C)@3	cleaved A-E@N-term	1	P08603
sp|P08603|CFAH_HUMAN	EDCNELPPRR	Carbamidomethyl(C)@3	cleaved A-E@N-term; missed R-R@9	1	P08603
sp|P08603|CFAH_HUMAN	EDCNELPPRR	Glu->pyro-Glu@N-term; Carbamidomethyl(C)@3	cleaved A-E@N-term; missed R-R@9	1	P08603
sp|P08603|CFAH_HUMAN	EDCNELPPRR	Carbamidomethyl(C)@3	cleaved A-E@N-term; missed R-R@9	1	P08603
sp|P08603|CFAH_HUMAN	EDCNELPPRR	Carbamidomethyl(C)@3	cleaved A-E@N-term; missed R-R@9	1	P08603
sp|P08603|CFAH_HUMAN	EDCNELPPRR	Glu->pyro-Glu@N-term; Carbamidomethyl(C)@3	cleaved A-E@N-term; missed R-R@9	1	P08603
sp|P08603|CFAH_HUMAN	EDCNELPPRR	Carbamidomethyl(C)@3	cleaved A-E@N-term; missed R-R@9	1	P08603
sp|P08603|CFAH_HUMAN	EDCNELPPRR	Carbamidomethyl(C)@3	cleaved A-E@N-term; missed R-R@9	1	P08603
sp|P08603|CFAH_HUMAN	EDCNELPPRR	Glu->pyro-Glu@N-term; Carbamidomethyl(C)@3	cleaved A-E@N-term; missed R-R@9	1	P08603
sp|P08603|CFAH_HUMAN	EDCNELPPRR	Carbamidomethyl(C)@3	cleaved A-E@N-term; missed R-R@9	1	P08603
sp|P08603|CFAH_HUMAN	EDCNELPPRR	Glu->pyro-Glu@N-term; Carbamidomethyl(C)@3	cleaved A-E@N-term; missed R-R@9	1	P08603
sp|P08603|CFAH_HUMAN	EDCNELPPRR	Carbamidomethyl(C)@3	cleaved A-E@N-term; missed R-R@9	1	P08603
sp|P08603|CFAH_HUMAN	EDCNELPPRR	Glu->pyro-Glu@N-term; Carbamidomethyl(C)@3	cleaved A-E@N-term; missed R-R@9	1	P08603
sp|P08603|CFAH_HUMAN	EDCNELPPRR	Carbamidomethyl(C)@3	cleaved A-E@N-term; missed R-R@9	1	P08603
sp|P08603|CFAH_HUMAN	EDCNELPPRR	Carbamidomethyl(C)@3	cleaved A-E@N-term; missed R-R@9	1	P08603
sp|P08603|CFAH_HUMAN	EDCNELPPRR	Glu->pyro-Glu@N-term; Carbamidomethyl(C)@3	cleaved A-E@N-term; missed R-R@9	1	P08603
sp|P08603|CFAH_HUMAN	EDCNELPPRR	Carbamidomethyl(C)@3	cleaved A-E@N-term; missed R-R@9	1	P08603
sp|P08603|CFAH_HUMAN	EDCNELPPRR	Carbamidomethyl(C)@3	cleaved A-E@N-term; missed R-R@9	1	P08603
sp|P08603|CFAH_HUMAN	EDCNELPPRR	Carbamidomethyl(C)@3	cleaved A-E@N-term; missed R-R@9	1	P08603
sp|P08603|CFAH_HUMAN	EDCNELPPRR	Carbamidomethyl(C)@3	cleaved A-E@N-term; missed R-R@9	1	P08603
sp|P08603|CFAH_HUMAN	EDCNELPPRR	Carbamidomethyl(C)@3	cleaved A-E@N-term; missed R-R@9	1	P08603
sp|P08603|CFAH_HUMAN	EDCNELPPRR	Carbamidomethyl(C)@3	cleaved A-E@N-term; missed R-R@9	1	P08603
sp|P08603|CFAH_HUMAN	EDCNELPPRR	Carbamidomethyl(C)@3	cleaved A-E@N-term; missed R-R@9	1	P08603
sp|P08603|CFAH_HUMAN	EDCNELPPRR	Carbamidomethyl(C)@3	cleaved A-E@N-term; missed R-R@9	1	P08603
sp|P08603|CFAH_HUMAN	EDCNELPPRR	Carbamidomethyl(C)@3	cleaved A-E@N-term; missed R-R@9	1	P08603
sp|P08603|CFAH_HUMAN	EDCNELPPRR	Carbamidomethyl(C)@3	cleaved A-E@N-term; missed R-R@9	1	P08603
sp|P08603|CFAH_HUMAN	EDCNELPPRR	Glu->pyro-Glu@N-term; Carbamidomethyl(C)@3	cleaved A-E@N-term; missed R-R@9	1	P08603
sp|P08603|CFAH_HUMAN	EDCNELPPRR	Glu->pyro-Glu@N-term; Carbamidomethyl(C)@3	cleaved A-E@N-term; missed R-R@9	1	P08603
sp|P08603|CFAH_HUMAN	EDCNELPPRR	Carbamidomethyl(C)@3	cleaved A-E@N-term; missed R-R@9	1	P08603
sp|P08603|CFAH_HUMAN	EDCNELPPRR	Carbamidomethyl(C)@3	cleaved A-E@N-term; missed R-R@9	1	P08603
sp|P08603|CFAH_HUMAN	EDCNELPPRR	Carbamidomethyl(C)@3	cleaved A-E@N-term; missed R-R@9	1	P08603
sp|P08603|CFAH_HUMAN	EDCNELPPRR	Carbamidomethyl(C)@3	cleaved A-E@N-term; missed R-R@9	1	P08603
sp|P08603|CFAH_HUMAN	EDCNELPPRR	Carbamidomethyl(C)@3	cleaved A-E@N-term; missed R-R@9	1	P08603
sp|P08603|CFAH_HUMAN	EDCNELPPRR	Carbamidomethyl(C)@3	cleaved A-E@N-term; missed R-R@9	1	P08603
sp|P08603|CFAH_HUMAN	EDCNELPPRR	Carbamidomethyl(C)@3	cleaved A-E@N-term; missed R-R@9	1	P08603
sp|P08603|CFAH_HUMAN	EDCNELPPRR	Carbamidomethyl(C)@3	cleaved A-E@N-term; missed R-R@9	1	P08603
sp|P08603|CFAH_HUMAN	EDCNELPPRR	Carbamidomethyl(C)@3	cleaved A-E@N-term; missed R-R@9	1	P08603
sp|P08603|CFAH_HUMAN	EDCNELPPRR	Carbamidomethyl(C)@3	cleaved A-E@N-term; missed R-R@9	1	P08603
sp|P08603|CFAH_HUMAN	EDCNELPPRR	Carbamidomethyl(C)@3	cleaved A-E@N-term; missed R-R@9	1	P08603
sp|P08603|CFAH_HUMAN	EDCNELPPRR	Carbamidomethyl(C)@3	cleaved A-E@N-term; missed R-R@9	1	P08603
sp|P08603|CFAH_HUMAN	EDCNELPPRR	Carbamidomethyl(C)@3	cleaved A-E@N-term; missed R-R@9	1	P08603
sp|P08603|CFAH_HUMAN	EDCNELPPRR	Carbamidomethyl(C)@3	cleaved A-E@N-term; missed R-R@9	1	P08603
sp|P08603|CFAH_HUMAN	EDCNELPPRR	Carbamidomethyl(C)@3	cleaved A-E@N-term; missed R-R@9	1	P08603
sp|P08603|CFAH_HUMAN	EDCNELPPRR	Glu->pyro-Glu@N-term; Carbamidomethyl(C)@3	cleaved A-E@N-term; missed R-R@9	1	P08603
sp|P08603|CFAH_HUMAN	EDCNELPPRR	Glu->pyro-Glu@N-term; Carbamidomethyl(C)@3	cleaved A-E@N-term; missed R-R@9	1	P08603
sp|P08603|CFAH_HUMAN	EDCNELPPRRNTEILTGSWSDQTYPEGTQAIYK	Carbamidomethyl(C)@3	cleaved A-E@N-term; missed R-R@9; missed R-N@10	1	P08603
sp|P08603|CFAH_HUMAN	EDCNELPPRRNTEILTGSWSDQTYPEGTQAIYK	Carbamidomethyl(C)@3	cleaved A-E@N-term; missed R-R@9; missed R-N@10	1	P08603
sp|P08603|CFAH_HUMAN	EDCNELPPRRNTEILTGSWSDQTYPEGTQAIYK	Carbamidomethyl(C)@3	cleaved A-E@N-term; missed R-R@9; missed R-N@10	1	P08603
sp|P08603|CFAH_HUMAN	EDCNELPPRRNTEILTGSWSDQTYPEGTQAIYK	Carbamidomethyl(C)@3	cleaved A-E@N-term; missed R-R@9; missed R-N@10	1	P08603
sp|P08603|CFAH_HUMAN	EDCNELPPRRNTEILTGSWSDQTYPEGTQAIYK	Carbamidomethyl(C)@3	cleaved A-E@N-term; missed R-R@9; missed R-N@10	1	P08603
sp|P08603|CFAH_HUMAN	EDCNELPPRRNTEILTGSWSDQTYPEGTQAIYK	Carbamidomethyl(C)@3	cleaved A-E@N-term; missed R-R@9; missed R-N@10	1	P08603
sp|P08603|CFAH_HUMAN	EDCNELPPRRNTEILTGSWSDQTYPEGTQAIYK	Carbamidomethyl(C)@3; Oxidation(P)@8	cleaved A-E@N-term; missed R-R@9; missed R-N@10	1	P08603
sp|P08603|CFAH_HUMAN	EDCNELPPRRNTEILTGSWSDQTYPEGTQAIYK	Carbamidomethyl(C)@3	cleaved A-E@N-term; missed R-R@9; missed R-N@10	1	P08603
sp|P08603|CFAH_HUMAN	EDCNELPPRRNTEILTGSWSDQTYPEGTQAIYK	Carbamidomethyl(C)@3	cleaved A-E@N-term; missed R-R@9; missed R-N@10	1	P08603
sp|P08603|CFAH_HUMAN	EDCNELPPRRNTEILTGSWSDQTYPEGTQAIYK	Carbamidomethyl(C)@3	cleaved A-E@N-term; missed R-R@9; missed R-N@10	1	P08603
sp|P08603|CFAH_HUMAN	EDCNELPPRRNTEILTGSWSDQTYPEGTQAIYK	Carbamidomethyl(C)@3; Deamidated(N)@11	cleaved A-E@N-term; missed R-R@9; missed R-N@10	1	P08603
sp|P08603|CFAH_HUMAN	EDCNELPPRRNTEILTGSWSDQTYPEGTQAIYK	Carbamidomethyl(C)@3; Deamidated(N)@11; Deamidated(Q)@22	cleaved A-E@N-term; missed R-R@9; missed R-N@10	1	P08603
sp|P08603|CFAH_HUMAN	EDCNELPPRRNTEILTGSWSDQTYPEGTQAIYK	Carbamidomethyl(C)@3; Deamidated(N)@11	cleaved A-E@N-term; missed R-R@9; missed R-N@10	1	P08603
sp|P08603|CFAH_HUMAN	EEYGHSEVVEYYCNPR	Carbamidomethyl(C)@13		1	P08603
sp|P08603|CFAH_HUMAN	EGWIHTVCINGR	Carbamidomethyl(C)@8; Deamidated(N)@10		1	P08603
sp|P08603|CFAH_HUMAN	EGWIHTVCINGR	Carbamidomethyl(C)@8; Deamidated(N)@10		1	P08603
sp|P08603|CFAH_HUMAN	EGWIHTVCINGR	Carbamidomethyl(C)@8; Deamidated(N)@10		1	P08603
sp|P08603|CFAH_HUMAN	EGWIHTVCINGR	Carbamidomethyl(C)@8; Deamidated(N)@10		1	P08603
sp|P08603|CFAH_HUMAN	EGWIHTVCINGR	Carbamidomethyl(C)@8; Deamidated(N)@10		1	P08603
sp|P08603|CFAH_HUMAN	EGWIHTVCINGR	Carbamidomethyl(C)@8; Deamidated(N)@10		1	P08603
sp|P08603|CFAH_HUMAN	EGWIHTVCINGR	Carbamidomethyl(C)@8; Deamidated(N)@10		1	P08603
sp|P08603|CFAH_HUMAN	EGWIHTVCINGR	Carbamidomethyl(C)@8; Deamidated(N)@10		1	P08603
sp|P08603|CFAH_HUMAN	EGWIHTVCINGR	Carbamidomethyl(C)@8		1	P08603
sp|P08603|CFAH_HUMAN	EGWIHTVCINGR	Carbamidomethyl(C)@8		1	P08603
sp|P08603|CFAH_HUMAN	EGWIHTVCINGR	Carbamidomethyl(C)@8		1	P08603
sp|P08603|CFAH_HUMAN	EGWIHTVCINGR	Carbamidomethyl(C)@8		1	P08603
sp|P08603|CFAH_HUMAN	EGWIHTVCINGR	Carbamidomethyl(C)@8; Deamidated(N)@10		1	P08603
sp|P08603|CFAH_HUMAN	EGWIHTVCINGR	Carbamidomethyl(C)@8		1	P08603
sp|P08603|CFAH_HUMAN	EGWIHTVCINGR	Carbamidomethyl(C)@8; Deamidated(N)@10		1	P08603
sp|P08603|CFAH_HUMAN	EGWIHTVCINGR	Carbamidomethyl(C)@8; Deamidated(N)@10		1	P08603
sp|P08603|CFAH_HUMAN	EGWIHTVCINGR	Carbamidomethyl(C)@8		1	P08603
sp|P08603|CFAH_HUMAN	EGWIHTVCINGR	Carbamidomethyl(C)@8		1	P08603
sp|P08603|CFAH_HUMAN	EGWIHTVCINGR	Carbamidomethyl(C)@8; Deamidated(N)@10		1	P08603
sp|P08603|CFAH_HUMAN	EGWIHTVCINGR	Carbamidomethyl(C)@8		1	P08603
sp|P08603|CFAH_HUMAN	EGWIHTVCINGR	Carbamidomethyl(C)@8; Deamidated(N)@10		1	P08603
sp|P08603|CFAH_HUMAN	EGWIHTVCINGR	Carbamidomethyl(C)@8		1	P08603
sp|P08603|CFAH_HUMAN	EGWIHTVCINGR	Carbamidomethyl(C)@8		1	P08603
sp|P08603|CFAH_HUMAN	EGWIHTVCINGR	Carbamidomethyl(C)@8		1	P08603
sp|P08603|CFAH_HUMAN	EGWIHTVCINGR	Carbamidomethyl(C)@8; Deamidated(N)@10; Deamidated(R)@12		1	P08603
sp|P08603|CFAH_HUMAN	EGWIHTVCINGR	Carbamidomethyl(C)@8; Deamidated(N)@10		1	P08603
sp|P08603|CFAH_HUMAN	EGWIHTVCINGR	Carbamidomethyl(C)@8		1	P08603
sp|P08603|CFAH_HUMAN	EGWIHTVCINGR	Carbamidomethyl(C)@8		1	P08603
sp|P08603|CFAH_HUMAN	EGWIHTVCINGR	Carbamidomethyl(C)@8		1	P08603
sp|P08603|CFAH_HUMAN	EGWIHTVCINGR	Carbamidomethyl(C)@8		1	P08603
sp|P08603|CFAH_HUMAN	EGWIHTVCINGR	Carbamidomethyl(C)@8; Deamidated(N)@10		1	P08603
sp|P08603|CFAH_HUMAN	EIMENYNIALR	Oxidation(M)@3		2	P08603, Q03591
sp|P08603|CFAH_HUMAN	EIMENYNIALR	Oxidation(M)@3		2	P08603, Q03591
sp|P08603|CFAH_HUMAN	EIMENYNIALR	Oxidation(M)@3		2	P08603, Q03591
sp|P08603|CFAH_HUMAN	EIMENYNIALR			2	P08603, Q03591
sp|P08603|CFAH_HUMAN	EIMENYNIALR			2	P08603, Q03591
sp|P08603|CFAH_HUMAN	EIMENYNIALR	Oxidation(M)@3		2	P08603, Q03591
sp|P08603|CFAH_HUMAN	EIMENYNIALR			2	P08603, Q03591
sp|P08603|CFAH_HUMAN	EIMENYNIALR			2	P08603, Q03591
sp|P08603|CFAH_HUMAN	EIMENYNIALR			2	P08603, Q03591
sp|P08603|CFAH_HUMAN	EIMENYNIALR			2	P08603, Q03591
sp|P08603|CFAH_HUMAN	EIMENYNIALR	Oxidation(M)@3		2	P08603, Q03591
sp|P08603|CFAH_HUMAN	EIMENYNIALR			2	P08603, Q03591
sp|P08603|CFAH_HUMAN	EIMENYNIALR			2	P08603, Q03591
sp|P08603|CFAH_HUMAN	EIMENYNIALR			2	P08603, Q03591
sp|P08603|CFAH_HUMAN	EIMENYNIALR			2	P08603, Q03591
sp|P08603|CFAH_HUMAN	EIMENYNIALR			2	P08603, Q03591
sp|P08603|CFAH_HUMAN	EIMENYNIALR			2	P08603, Q03591
sp|P08603|CFAH_HUMAN	EIMENYNIALR			2	P08603, Q03591
sp|P08603|CFAH_HUMAN	EIMENYNIALR			2	P08603, Q03591
sp|P08603|CFAH_HUMAN	EIMENYNIALR			2	P08603, Q03591
sp|P08603|CFAH_HUMAN	EIMENYNIALR			2	P08603, Q03591
sp|P08603|CFAH_HUMAN	EIMENYNIALR			2	P08603, Q03591
sp|P08603|CFAH_HUMAN	EIMENYNIALR			2	P08603, Q03591
sp|P08603|CFAH_HUMAN	EIMENYNIALR			2	P08603, Q03591
sp|P08603|CFAH_HUMAN	EIMENYNIALR			2	P08603, Q03591
sp|P08603|CFAH_HUMAN	EIMENYNIALR			2	P08603, Q03591
sp|P08603|CFAH_HUMAN	EIMENYNIALR			2	P08603, Q03591
sp|P08603|CFAH_HUMAN	EIMENYNIALR			2	P08603, Q03591
sp|P08603|CFAH_HUMAN	EIMENYNIALR			2	P08603, Q03591
sp|P08603|CFAH_HUMAN	EIMENYNIALR			2	P08603, Q03591
sp|P08603|CFAH_HUMAN	EIMENYNIALR			2	P08603, Q03591
sp|P08603|CFAH_HUMAN	EIMENYNIALR			2	P08603, Q03591
sp|P08603|CFAH_HUMAN	EIMENYNIALR			2	P08603, Q03591
sp|P08603|CFAH_HUMAN	EIMENYNIALR			2	P08603, Q03591
sp|P08603|CFAH_HUMAN	EIMENYNIALR			2	P08603, Q03591
sp|P08603|CFAH_HUMAN	EIMENYNIALR			2	P08603, Q03591
sp|P08603|CFAH_HUMAN	EIMENYNIALR			2	P08603, Q03591
sp|P08603|CFAH_HUMAN	EIMENYNIALR			2	P08603, Q03591
sp|P08603|CFAH_HUMAN	EIMENYNIALR			2	P08603, Q03591
sp|P08603|CFAH_HUMAN	EIMENYNIALR			2	P08603, Q03591
sp|P08603|CFAH_HUMAN	EIMENYNIALR			2	P08603, Q03591
sp|P08603|CFAH_HUMAN	EIMENYNIALR			2	P08603, Q03591
sp|P08603|CFAH_HUMAN	EIMENYNIALR			2	P08603, Q03591
sp|P08603|CFAH_HUMAN	EIMENYNIALR			2	P08603, Q03591
sp|P08603|CFAH_HUMAN	EIMENYNIALR	Glu->pyro-Glu@N-term		2	P08603, Q03591
sp|P08603|CFAH_HUMAN	EIMENYNIALR			2	P08603, Q03591
sp|P08603|CFAH_HUMAN	EIMENYNIALR	Oxidation(M)@3		2	P08603, Q03591
sp|P08603|CFAH_HUMAN	EIMENYNIALR			2	P08603, Q03591
sp|P08603|CFAH_HUMAN	EIMENYNIALR	Deamidated(N)@5		2	P08603, Q03591
sp|P08603|CFAH_HUMAN	EIMENYNIALR			2	P08603, Q03591
sp|P08603|CFAH_HUMAN	EIMENYNIALR			2	P08603, Q03591
sp|P08603|CFAH_HUMAN	EIMENYNIALR			2	P08603, Q03591
sp|P08603|CFAH_HUMAN	EIMENYNIALR			2	P08603, Q03591
sp|P08603|CFAH_HUMAN	EIMENYNIALR			2	P08603, Q03591
sp|P08603|CFAH_HUMAN	EIMENYNIALR	Deamidated(N)@5		2	P08603, Q03591
sp|P08603|CFAH_HUMAN	EIMENYNIALR	Deamidated(N)@5		2	P08603, Q03591
sp|P08603|CFAH_HUMAN	EIMENYNIALR			2	P08603, Q03591
sp|P08603|CFAH_HUMAN	EIMENYNIALR			2	P08603, Q03591
sp|P08603|CFAH_HUMAN	EIMENYNIALR			2	P08603, Q03591
sp|P08603|CFAH_HUMAN	EIMENYNIALR	Oxidation(M)@3; Deamidated(N)@5		2	P08603, Q03591
sp|P08603|CFAH_HUMAN	EIMENYNIALR			2	P08603, Q03591
sp|P08603|CFAH_HUMAN	EIMENYNIALR			2	P08603, Q03591
sp|P08603|CFAH_HUMAN	EIMENYNIALR	Oxidation(M)@3		2	P08603, Q03591
sp|P08603|CFAH_HUMAN	EIMENYNIALR			2	P08603, Q03591
sp|P08603|CFAH_HUMAN	EIMENYNIALR			2	P08603, Q03591
sp|P08603|CFAH_HUMAN	EIMENYNIALR	Deamidated(N)@5		2	P08603, Q03591
sp|P08603|CFAH_HUMAN	EIMENYNIALR			2	P08603, Q03591
sp|P08603|CFAH_HUMAN	EIMENYNIALR			2	P08603, Q03591
sp|P08603|CFAH_HUMAN	EIMENYNIALR	Oxidation(M)@3		2	P08603, Q03591
sp|P08603|CFAH_HUMAN	EIMENYNIALR	Glu->pyro-Glu@N-term; Oxidation(M)@3; Deamidated(N)@5		2	P08603, Q03591
sp|P08603|CFAH_HUMAN	EIMENYNIALR	Deamidated(N)@5		2	P08603, Q03591
sp|P08603|CFAH_HUMAN	EIMENYNIALR	Oxidation(M)@3; Deamidated(N)@5		2	P08603, Q03591
sp|P08603|CFAH_HUMAN	EIMENYNIALR	Oxidation(M)@3; Deamidated(N)@5		2	P08603, Q03591
sp|P08603|CFAH_HUMAN	EIMENYNIALR	Oxidation(M)@3; Ammonia-loss(N)@5		2	P08603, Q03591
sp|P08603|CFAH_HUMAN	EIMENYNIALR	Deamidated(N)@5		2	P08603, Q03591
sp|P08603|CFAH_HUMAN	EIMENYNIALR			2	P08603, Q03591
sp|P08603|CFAH_HUMAN	EIMENYNIALR	Oxidation(M)@3; Deamidated(N)@5		2	P08603, Q03591
sp|P08603|CFAH_HUMAN	EIMENYNIALR	Oxidation(M)@3		2	P08603, Q03591
sp|P08603|CFAH_HUMAN	EIMENYNIALR	Deamidated(N)@5		2	P08603, Q03591
sp|P08603|CFAH_HUMAN	EIMENYNIALR	Deamidated(N)@5		2	P08603, Q03591
sp|P08603|CFAH_HUMAN	EIMENYNIALR	Carbamidomethyl@N-term		2	P08603, Q03591
sp|P08603|CFAH_HUMAN	EIMENYNIALR	Carbamidomethyl@N-term		2	P08603, Q03591
sp|P08603|CFAH_HUMAN	EIMENYNIALR	Oxidation(M)@3		2	P08603, Q03591
sp|P08603|CFAH_HUMAN	EKTKEEYGHSEVVEYYCNPR	Carbamidomethyl(C)@17; Deamidated(N)@18	missed K-T@2; missed K-E@4	1	P08603
sp|P08603|CFAH_HUMAN	EKTKEEYGHSEVVEYYCNPR	Carbamidomethyl(C)@17	missed K-T@2; missed K-E@4	1	P08603
sp|P08603|CFAH_HUMAN	EKTKEEYGHSEVVEYYCNPR	Carbamidomethyl(C)@17	missed K-T@2; missed K-E@4	1	P08603
sp|P08603|CFAH_HUMAN	EKTKEEYGHSEVVEYYCNPR	Carbamidomethyl(C)@17	missed K-T@2; missed K-E@4	1	P08603
sp|P08603|CFAH_HUMAN	EKTKEEYGHSEVVEYYCNPR	Carbamidomethyl(C)@17	missed K-T@2; missed K-E@4	1	P08603
sp|P08603|CFAH_HUMAN	EKTKEEYGHSEVVEYYCNPR	Carbamidomethyl(C)@17	missed K-T@2; missed K-E@4	1	P08603
sp|P08603|CFAH_HUMAN	EKTKEEYGHSEVVEYYCNPR	Carbamidomethyl(C)@17	missed K-T@2; missed K-E@4	1	P08603
sp|P08603|CFAH_HUMAN	EKTKEEYGHSEVVEYYCNPR	Carbamidomethyl(C)@17	missed K-T@2; missed K-E@4	1	P08603
sp|P08603|CFAH_HUMAN	EQVQSCGPPPELLNGNVK	Carbamidomethyl(C)@6; Deamidated(N)@14		1	P08603
sp|P08603|CFAH_HUMAN	EQVQSCGPPPELLNGNVK	Carbamidomethyl(C)@6; Deamidated(N)@14		1	P08603
sp|P08603|CFAH_HUMAN	EQVQSCGPPPELLNGNVK	Deamidated(Q)@4; Carbamidomethyl(C)@6; Deamidated(N)@14		1	P08603
sp|P08603|CFAH_HUMAN	EQVQSCGPPPELLNGNVK	Deamidated(Q)@4; Carbamidomethyl(C)@6; Deamidated(N)@14		1	P08603
sp|P08603|CFAH_HUMAN	EQVQSCGPPPELLNGNVK	Deamidated(Q)@2; Deamidated(Q)@4; Carbamidomethyl(C)@6; Deamidated(N)@14		1	P08603
sp|P08603|CFAH_HUMAN	EQVQSCGPPPELLNGNVK	Deamidated(Q)@4; Carbamidomethyl(C)@6; Deamidated(N)@14		1	P08603
sp|P08603|CFAH_HUMAN	EQVQSCGPPPELLNGNVK	Carbamidomethyl(C)@6		1	P08603
sp|P08603|CFAH_HUMAN	EQVQSCGPPPELLNGNVK	Carbamidomethyl(C)@6		1	P08603
sp|P08603|CFAH_HUMAN	EQVQSCGPPPELLNGNVK	Carbamidomethyl(C)@6		1	P08603
sp|P08603|CFAH_HUMAN	EQVQSCGPPPELLNGNVK	Carbamidomethyl(C)@6		1	P08603
sp|P08603|CFAH_HUMAN	EQVQSCGPPPELLNGNVK	Carbamidomethyl(C)@6		1	P08603
sp|P08603|CFAH_HUMAN	EQVQSCGPPPELLNGNVK	Carbamidomethyl(C)@6		1	P08603
sp|P08603|CFAH_HUMAN	EQVQSCGPPPELLNGNVK	Carbamidomethyl(C)@6		1	P08603
sp|P08603|CFAH_HUMAN	EQVQSCGPPPELLNGNVK	Carbamidomethyl(C)@6		1	P08603
sp|P08603|CFAH_HUMAN	EQVQSCGPPPELLNGNVK	Carbamidomethyl(C)@6		1	P08603
sp|P08603|CFAH_HUMAN	EQVQSCGPPPELLNGNVK	Carbamidomethyl(C)@6; Deamidated(N)@14		1	P08603
sp|P08603|CFAH_HUMAN	EQVQSCGPPPELLNGNVK	Carbamidomethyl(C)@6		1	P08603
sp|P08603|CFAH_HUMAN	EQVQSCGPPPELLNGNVK	Deamidated(Q)@4; Carbamidomethyl(C)@6		1	P08603
sp|P08603|CFAH_HUMAN	EQVQSCGPPPELLNGNVK	Carbamidomethyl(C)@6		1	P08603
sp|P08603|CFAH_HUMAN	EQVQSCGPPPELLNGNVK	Carbamidomethyl(C)@6; Deamidated(N)@14		1	P08603
sp|P08603|CFAH_HUMAN	EQVQSCGPPPELLNGNVK	Carbamidomethyl(C)@6; Deamidated(N)@14		1	P08603
sp|P08603|CFAH_HUMAN	EQVQSCGPPPELLNGNVK	Carbamidomethyl(C)@6		1	P08603
sp|P08603|CFAH_HUMAN	EQVQSCGPPPELLNGNVK	Carbamidomethyl(C)@6; Deamidated(N)@14		1	P08603
sp|P08603|CFAH_HUMAN	EQVQSCGPPPELLNGNVK	Deamidated(Q)@4; Carbamidomethyl(C)@6		1	P08603
sp|P08603|CFAH_HUMAN	EQVQSCGPPPELLNGNVK	Carbamidomethyl(C)@6; Deamidated(N)@14		1	P08603
sp|P08603|CFAH_HUMAN	EQVQSCGPPPELLNGNVK	Carbamidomethyl(C)@6; Deamidated(N)@14		1	P08603
sp|P08603|CFAH_HUMAN	EQVQSCGPPPELLNGNVK	Carbamidomethyl(C)@6; Deamidated(N)@14		1	P08603
sp|P08603|CFAH_HUMAN	EQVQSCGPPPELLNGNVK	Carbamidomethyl(C)@6; Deamidated(N)@14		1	P08603
sp|P08603|CFAH_HUMAN	EQVQSCGPPPELLNGNVK	Carbamidomethyl(C)@6		1	P08603
sp|P08603|CFAH_HUMAN	EQVQSCGPPPELLNGNVK	Carbamidomethyl(C)@6; Deamidated(N)@16		1	P08603
sp|P08603|CFAH_HUMAN	EQVQSCGPPPELLNGNVK	Deamidated(Q)@2; Deamidated(Q)@4; Carbamidomethyl(C)@6; Deamidated(N)@14		1	P08603
sp|P08603|CFAH_HUMAN	EQVQSCGPPPELLNGNVK	Carbamidomethyl(C)@6		1	P08603
sp|P08603|CFAH_HUMAN	EQVQSCGPPPELLNGNVKEK	Carbamidomethyl(C)@6; Deamidated(N)@14	missed K-E@18	1	P08603
sp|P08603|CFAH_HUMAN	EQVQSCGPPPELLNGNVKEK	Deamidated(Q)@4; Carbamidomethyl(C)@6; Deamidated(N)@14	missed K-E@18	1	P08603
sp|P08603|CFAH_HUMAN	EQVQSCGPPPELLNGNVKEK	Deamidated(Q)@4; Carbamidomethyl(C)@6	missed K-E@18	1	P08603
sp|P08603|CFAH_HUMAN	EQVQSCGPPPELLNGNVKEK	Carbamidomethyl(C)@6	missed K-E@18	1	P08603
sp|P08603|CFAH_HUMAN	EQVQSCGPPPELLNGNVKEK	Carbamidomethyl(C)@6	missed K-E@18	1	P08603
sp|P08603|CFAH_HUMAN	EQVQSCGPPPELLNGNVKEK	Carbamidomethyl(C)@6	missed K-E@18	1	P08603
sp|P08603|CFAH_HUMAN	EQVQSCGPPPELLNGNVKEK	Carbamidomethyl(C)@6	missed K-E@18	1	P08603
sp|P08603|CFAH_HUMAN	EQVQSCGPPPELLNGNVKEK	Carbamidomethyl(C)@6	missed K-E@18	1	P08603
sp|P08603|CFAH_HUMAN	EQVQSCGPPPELLNGNVKEK	Carbamidomethyl(C)@6	missed K-E@18	1	P08603
sp|P08603|CFAH_HUMAN	EQVQSCGPPPELLNGNVKEK	Carbamidomethyl(C)@6	missed K-E@18	1	P08603
sp|P08603|CFAH_HUMAN	EQVQSCGPPPELLNGNVKEK	Carbamidomethyl(C)@6	missed K-E@18	1	P08603
sp|P08603|CFAH_HUMAN	EQVQSCGPPPELLNGNVKEK	Carbamidomethyl(C)@6; Deamidated(N)@14	missed K-E@18	1	P08603
sp|P08603|CFAH_HUMAN	EQVQSCGPPPELLNGNVKEK	Carbamidomethyl(C)@6; Deamidated(N)@14	missed K-E@18	1	P08603
sp|P08603|CFAH_HUMAN	EQVQSCGPPPELLNGNVKEK	Carbamidomethyl(C)@6	missed K-E@18	1	P08603
sp|P08603|CFAH_HUMAN	EQVQSCGPPPELLNGNVKEK	Carbamidomethyl(C)@6; Deamidated(N)@14	missed K-E@18	1	P08603
sp|P08603|CFAH_HUMAN	EQVQSCGPPPELLNGNVKEK	Carbamidomethyl(C)@6	missed K-E@18	1	P08603
sp|P08603|CFAH_HUMAN	EQVQSCGPPPELLNGNVKEKTKEEYGHSEVVEYYCNPR	Carbamidomethyl(C)@6; Carbamidomethyl(C)@35	missed K-E@18; missed K-T@20; missed K-E@22	1	P08603
sp|P08603|CFAH_HUMAN	FSCKPGFTIVGP	Carbamidomethyl(C)@3	cleaved P-N@C-term	1	P08603
sp|P08603|CFAH_HUMAN	FSCKPGFTIVGP	Carbamidomethyl(C)@3	cleaved P-N@C-term	1	P08603
sp|P08603|CFAH_HUMAN	FVCNSGYKIEGDEEMHCSDDGFWSK	Carbamidomethyl(C)@3; Carbamidomethyl(E)@14; Carbamidomethyl(C)@17	missed K-I@8	1	P08603
sp|P08603|CFAH_HUMAN	FVCNSGYKIEGDEEMHCSDDGFWSK	Carbamidomethyl(C)@3; Carbamidomethyl(E)@14; Carbamidomethyl(C)@17	missed K-I@8	1	P08603
sp|P08603|CFAH_HUMAN	FVCNSGYKIEGDEEMHCSDDGFWSK	Carbamidomethyl(C)@3; Carbamidomethyl(C)@17	missed K-I@8	1	P08603
sp|P08603|CFAH_HUMAN	FVCNSGYKIEGDEEMHCSDDGFWSK	Carbamidomethyl(C)@3; Carbamidomethyl(E)@14; Carbamidomethyl(C)@17	missed K-I@8	1	P08603
sp|P08603|CFAH_HUMAN	FVCNSGYKIEGDEEMHCSDDGFWSK	Carbamidomethyl(C)@3; Carbamidomethyl(K)@8; Carbamidomethyl(C)@17	missed K-I@8	1	P08603
sp|P08603|CFAH_HUMAN	FVCNSGYKIEGDEEMHCSDDGFWSK	Carbamidomethyl(C)@3; Carbamidomethyl(E)@14; Carbamidomethyl(C)@17	missed K-I@8	1	P08603
sp|P08603|CFAH_HUMAN	FVCNSGYKIEGDEEMHCSDDGFWSK	Carbamidomethyl(C)@3; Deamidated(N)@4; Carbamidomethyl(K)@8; Carbamidomethyl(C)@17	missed K-I@8	1	P08603
sp|P08603|CFAH_HUMAN	FVCNSGYKIEGDEEMHCSDDGFWSK	Carbamidomethyl(C)@3; Carbamidomethyl(E)@14; Carbamidomethyl(C)@17	missed K-I@8	1	P08603
sp|P08603|CFAH_HUMAN	FVCNSGYKIEGDEEMHCSDDGFWSK	Carbamidomethyl(C)@3; Deamidated(N)@4; Carbamidomethyl(E)@14; Carbamidomethyl(C)@17	missed K-I@8	1	P08603
sp|P08603|CFAH_HUMAN	FVCNSGYKIEGDEEMHCSDDGFWSK	Carbamidomethyl(C)@3; Carbamidomethyl(K)@8; Carbamidomethyl(C)@17	missed K-I@8	1	P08603
sp|P08603|CFAH_HUMAN	FVCNSGYKIEGDEEMHCSDDGFWSK	Carbamidomethyl(C)@3; Carbamidomethyl(K)@8; Carbamidomethyl(C)@17	missed K-I@8	1	P08603
sp|P08603|CFAH_HUMAN	FVCNSGYKIEGDEEMHCSDDGFWSK	Carbamidomethyl(C)@3; Carbamidomethyl(K)@8; Carbamidomethyl(C)@17	missed K-I@8	1	P08603
sp|P08603|CFAH_HUMAN	FVCNSGYKIEGDEEMHCSDDGFWSK	Carbamidomethyl(C)@3; Carbamidomethyl(K)@8; Carbamidomethyl(C)@17	missed K-I@8	1	P08603
sp|P08603|CFAH_HUMAN	FVCNSGYKIEGDEEMHCSDDGFWSK	Carbamidomethyl(C)@3; Deamidated(N)@4; Carbamidomethyl(K)@8; Carbamidomethyl(C)@17	missed K-I@8	1	P08603
sp|P08603|CFAH_HUMAN	FVCNSGYKIEGDEEMHCSDDGFWSK	Carbamidomethyl(C)@3; Carbamidomethyl(K)@8; Carbamidomethyl(C)@17	missed K-I@8	1	P08603
sp|P08603|CFAH_HUMAN	FVCNSGYKIEGDEEMHCSDDGFWSK	Carbamidomethyl(C)@3; Carbamidomethyl(K)@8; Carbamidomethyl(C)@17	missed K-I@8	1	P08603
sp|P08603|CFAH_HUMAN	FVCNSGYKIEGDEEMHCSDDGFWSK	Carbamidomethyl(C)@3; Carbamyl(K)@8; Oxidation(M)@15; Carbamidomethyl(C)@17	missed K-I@8	1	P08603
sp|P08603|CFAH_HUMAN	FVCNSGYKIEGDEEMHCSDDGFWSK	Carbamidomethyl(C)@3; Carbamidomethyl(K)@8; Carbamidomethyl(C)@17	missed K-I@8	1	P08603
sp|P08603|CFAH_HUMAN	FVCNSGYKIEGDEEMHCSDDGFWSK	Carbamidomethyl(C)@3; Carbamidomethyl(K)@8; Carbamidomethyl(C)@17	missed K-I@8	1	P08603
sp|P08603|CFAH_HUMAN	FVCNSGYKIEGDEEMHCSDDGFWSK	Carbamidomethyl(C)@3; Carbamidomethyl(K)@8; Carbamidomethyl(C)@17	missed K-I@8	1	P08603
sp|P08603|CFAH_HUMAN	FVCNSGYKIEGDEEMHCSDDGFWSK	Carbamidomethyl(C)@3; Carbamidomethyl(K)@8; Carbamidomethyl(C)@17	missed K-I@8	1	P08603
sp|P08603|CFAH_HUMAN	FVCNSGYKIEGDEEMHCSDDGFWSK	Carbamidomethyl(C)@3; Deamidated(N)@4; Carbamidomethyl(K)@8; Carbamidomethyl(C)@17	missed K-I@8	1	P08603
sp|P08603|CFAH_HUMAN	FVCNSGYKIEGDEEMHCSDDGFWSK	Carbamidomethyl(C)@3; Carbamidomethyl(E)@14; Carbamidomethyl(C)@17	missed K-I@8	1	P08603
sp|P08603|CFAH_HUMAN	FVCNSGYKIEGDEEMHCSDDGFWSK	Carbamidomethyl(C)@3; Carbamidomethyl(E)@14; Carbamidomethyl(C)@17	missed K-I@8	1	P08603
sp|P08603|CFAH_HUMAN	FVCNSGYKIEGDEEMHCSDDGFWSK	Carbamidomethyl(C)@3; Deamidated(N)@4; Carbamidomethyl(K)@8; Carbamidomethyl(C)@17	missed K-I@8	1	P08603
sp|P08603|CFAH_HUMAN	FVCNSGYKIEGDEEMHCSDDGFWSK	Carbamidomethyl(C)@3; Deamidated(N)@4; Carbamidomethyl(K)@8; Carbamidomethyl(C)@17	missed K-I@8	1	P08603
sp|P08603|CFAH_HUMAN	FVCNSGYKIEGDEEMHCSDDGFWSK	Carbamidomethyl(C)@3; Deamidated(N)@4; Carbamidomethyl(K)@8; Carbamidomethyl(C)@17	missed K-I@8	1	P08603
sp|P08603|CFAH_HUMAN	FVCNSGYKIEGDEEMHCSDDGFWSK	Carbamidomethyl(C)@3; Carbamidomethyl(K)@8; Carbamidomethyl(C)@17	missed K-I@8	1	P08603
sp|P08603|CFAH_HUMAN	FVCNSGYKIEGDEEMHCSDDGFWSK	Carbamidomethyl(C)@3; Carbamidomethyl(K)@8; Carbamidomethyl(C)@17	missed K-I@8	1	P08603
sp|P08603|CFAH_HUMAN	FVCNSGYKIEGDEEMHCSDDGFWSK	Carbamidomethyl(C)@3; Carbamidomethyl(K)@8; Carbamidomethyl(C)@17	missed K-I@8	1	P08603
sp|P08603|CFAH_HUMAN	FVCNSGYKIEGDEEMHCSDDGFWSK	Carbamidomethyl(C)@3; Carbamidomethyl(K)@8; Carbamidomethyl(C)@17	missed K-I@8	1	P08603
sp|P08603|CFAH_HUMAN	FVCNSGYKIEGDEEMHCSDDGFWSK	Carbamidomethyl(C)@3; Carbamidomethyl(K)@8; Carbamidomethyl(C)@17	missed K-I@8	1	P08603
sp|P08603|CFAH_HUMAN	FVCNSGYKIEGDEEMHCSDDGFWSK	Carbamidomethyl(C)@3; Carbamidomethyl(K)@8; Carbamidomethyl(C)@17	missed K-I@8	1	P08603
sp|P08603|CFAH_HUMAN	FVCNSGYKIEGDEEMHCSDDGFWSK	Carbamidomethyl(C)@3; Deamidated(N)@4; Carbamidomethyl(K)@8; Carbamidomethyl(C)@17	missed K-I@8	1	P08603
sp|P08603|CFAH_HUMAN	FVCNSGYKIEGDEEMHCSDDGFWSKEKPK	Carbamidomethyl(C)@3; Oxidation(M)@15; Carbamidomethyl(C)@17	missed K-I@8; missed K-E@25	1	P08603
sp|P08603|CFAH_HUMAN	FVCNSGYKIEGDEEMHCSDDGFWSKEKPK	Carbamidomethyl(C)@3; Carbamidomethyl(C)@17	missed K-I@8; missed K-E@25	1	P08603
sp|P08603|CFAH_HUMAN	FVCNSGYKIEGDEEMHCSDDGFWSKEKPK	Carbamidomethyl(C)@3; Carbamidomethyl(C)@17	missed K-I@8; missed K-E@25	1	P08603
sp|P08603|CFAH_HUMAN	FVCNSGYKIEGDEEMHCSDDGFWSKEKPK	Carbamidomethyl(C)@3; Carbamidomethyl(C)@17	missed K-I@8; missed K-E@25	1	P08603
sp|P08603|CFAH_HUMAN	FVCNSGYKIEGDEEMHCSDDGFWSKEKPK	Carbamidomethyl(C)@3; Deamidated(N)@4; Carbamidomethyl(C)@17	missed K-I@8; missed K-E@25	1	P08603
sp|P08603|CFAH_HUMAN	FVCNSGYKIEGDEEMHCSDDGFWSKEKPK	Carbamidomethyl(C)@3; Carbamidomethyl(C)@17	missed K-I@8; missed K-E@25	1	P08603
sp|P08603|CFAH_HUMAN	FVCNSGYKIEGDEEMHCSDDGFWSKEKPK	Carbamidomethyl(C)@3; Carbamidomethyl(C)@17	missed K-I@8; missed K-E@25	1	P08603
sp|P08603|CFAH_HUMAN	FVCNSGYKIEGDEEMHCSDDGFWSKEKPK	Carbamidomethyl(C)@3; Carbamidomethyl(C)@17	missed K-I@8; missed K-E@25	1	P08603
sp|P08603|CFAH_HUMAN	FVCNSGYKIEGDEEMHCSDDGFWSKEKPK	Carbamidomethyl(C)@3; Carbamidomethyl(C)@17	missed K-I@8; missed K-E@25	1	P08603
sp|P08603|CFAH_HUMAN	FVCNSGYKIEGDEEMHCSDDGFWSKEKPK	Carbamidomethyl(C)@3; Deamidated(N)@4; Carbamidomethyl(C)@17	missed K-I@8; missed K-E@25	1	P08603
sp|P08603|CFAH_HUMAN	FVCNSGYKIEGDEEMHCSDDGFWSKEKPK	Carbamidomethyl(C)@3; Carbamidomethyl(C)@17	missed K-I@8; missed K-E@25	1	P08603
sp|P08603|CFAH_HUMAN	FVCNSGYKIEGDEEMHCSDDGFWSKEKPK	Carbamidomethyl(C)@3; Carbamidomethyl(C)@17	missed K-I@8; missed K-E@25	1	P08603
sp|P08603|CFAH_HUMAN	FVCNSGYKIEGDEEMHCSDDGFWSKEKPK	Carbamidomethyl(C)@3; Carbamidomethyl(C)@17	missed K-I@8; missed K-E@25	1	P08603
sp|P08603|CFAH_HUMAN	FVCNSGYKIEGDEEMHCSDDGFWSKEKPK	Carbamidomethyl(C)@3; Carbamidomethyl(C)@17	missed K-I@8; missed K-E@25	1	P08603
sp|P08603|CFAH_HUMAN	FVCNSGYKIEGDEEMHCSDDGFWSKEKPK	Carbamidomethyl(C)@3; Carbamidomethyl(C)@17	missed K-I@8; missed K-E@25	1	P08603
sp|P08603|CFAH_HUMAN	FVCNSGYKIEGDEEMHCSDDGFWSKEKPK	Carbamidomethyl(C)@3; Carbamidomethyl(C)@17	missed K-I@8; missed K-E@25	1	P08603
sp|P08603|CFAH_HUMAN	FVCNSGYKIEGDEEMHCSDDGFWSKEKPK	Carbamidomethyl(C)@3; Carbamidomethyl(K)@8; Carbamidomethyl(C)@17	missed K-I@8; missed K-E@25	1	P08603
sp|P08603|CFAH_HUMAN	FVCNSGYKIEGDEEMHCSDDGFWSKEKPK	Carbamidomethyl(C)@3; Carbamidomethyl(C)@17	missed K-I@8; missed K-E@25	1	P08603
sp|P08603|CFAH_HUMAN	FVCNSGYKIEGDEEMHCSDDGFWSKEKPK	Carbamidomethyl(C)@3; Trimethyl(K)@8; Oxidation(M)@15; Carbamidomethyl(C)@17	missed K-I@8; missed K-E@25	1	P08603
sp|P08603|CFAH_HUMAN	FVCNSGYKIEGDEEMHCSDDGFWSKEKPK	Carbamidomethyl(C)@3; Carbamidomethyl(E)@14; Carbamidomethyl(C)@17	missed K-I@8; missed K-E@25	1	P08603
sp|P08603|CFAH_HUMAN	FVCNSGYKIEGDEEMHCSDDGFWSKEKPK	Carbamidomethyl(C)@3; Carbamidomethyl(K)@8; Carbamidomethyl(C)@17	missed K-I@8; missed K-E@25	1	P08603
sp|P08603|CFAH_HUMAN	FVCNSGYKIEGDEEMHCSDDGFWSKEKPK	Carbamidomethyl(C)@3; Carbamidomethyl(K)@8; Carbamidomethyl(C)@17	missed K-I@8; missed K-E@25	1	P08603
sp|P08603|CFAH_HUMAN	FVCNSGYKIEGDEEMHCSDDGFWSKEKPK	Carbamidomethyl(C)@3; Carbamidomethyl(K)@8; Carbamidomethyl(C)@17	missed K-I@8; missed K-E@25	1	P08603
sp|P08603|CFAH_HUMAN	FVCNSGYKIEGDEEMHCSDDGFWSKEKPK	Carbamidomethyl(C)@3; Carbamidomethyl(K)@8; Carbamidomethyl(C)@17	missed K-I@8; missed K-E@25	1	P08603
sp|P08603|CFAH_HUMAN	FVCNSGYKIEGDEEMHCSDDGFWSKEKPK	Carbamidomethyl(C)@3; Deamidated(N)@4; Carbamidomethyl(C)@17	missed K-I@8; missed K-E@25	1	P08603
sp|P08603|CFAH_HUMAN	FVCNSGYKIEGDEEMHCSDDGFWSKEKPK	Carbamidomethyl(C)@3; Deamidated(N)@4; Carbamidomethyl(C)@17	missed K-I@8; missed K-E@25	1	P08603
sp|P08603|CFAH_HUMAN	FVCNSGYKIEGDEEMHCSDDGFWSKEKPK	Carbamidomethyl(C)@3; Carbamidomethyl(C)@17	missed K-I@8; missed K-E@25	1	P08603
sp|P08603|CFAH_HUMAN	FVCNSGYKIEGDEEMHCSDDGFWSKEKPK	Carbamidomethyl(C)@3; Deamidated(N)@4; Carbamidomethyl(C)@17	missed K-I@8; missed K-E@25	1	P08603
sp|P08603|CFAH_HUMAN	GEINYRECDTDGWTNDIPICEVVK	Carbamidomethyl(C)@8; Deamidated(N)@15; Carbamidomethyl(C)@20	cleaved L-G@N-term; missed R-E@6	1	P08603
sp|P08603|CFAH_HUMAN	GEWVALNPLR			1	P08603
sp|P08603|CFAH_HUMAN	GEWVALNPLR			1	P08603
sp|P08603|CFAH_HUMAN	GEWVALNPLRK		missed R-K@10	1	P08603
sp|P08603|CFAH_HUMAN	GEWVALNPLRK		missed R-K@10	1	P08603
sp|P08603|CFAH_HUMAN	GEWVALNPLRK		missed R-K@10	1	P08603
sp|P08603|CFAH_HUMAN	GEWVALNPLRK		missed R-K@10	1	P08603
sp|P08603|CFAH_HUMAN	GEWVALNPLRK		missed R-K@10	1	P08603
sp|P08603|CFAH_HUMAN	GEWVALNPLRK		missed R-K@10	1	P08603
sp|P08603|CFAH_HUMAN	GEWVALNPLRK		missed R-K@10	1	P08603
sp|P08603|CFAH_HUMAN	GEWVALNPLRK		missed R-K@10	1	P08603
sp|P08603|CFAH_HUMAN	GEWVALNPLRK		missed R-K@10	1	P08603
sp|P08603|CFAH_HUMAN	GEWVALNPLRK		missed R-K@10	1	P08603
sp|P08603|CFAH_HUMAN	GEWVALNPLRK		missed R-K@10	1	P08603
sp|P08603|CFAH_HUMAN	GEWVALNPLRK		missed R-K@10	1	P08603
sp|P08603|CFAH_HUMAN	GEWVALNPLRK		missed R-K@10	1	P08603
sp|P08603|CFAH_HUMAN	GEWVALNPLRK		missed R-K@10	1	P08603
sp|P08603|CFAH_HUMAN	GEWVALNPLRK		missed R-K@10	1	P08603
sp|P08603|CFAH_HUMAN	GEWVALNPLRK		missed R-K@10	1	P08603
sp|P08603|CFAH_HUMAN	GEWVALNPLRK		missed R-K@10	1	P08603
sp|P08603|CFAH_HUMAN	GEWVALNPLRK		missed R-K@10	1	P08603
sp|P08603|CFAH_HUMAN	GEWVALNPLRK		missed R-K@10	1	P08603
sp|P08603|CFAH_HUMAN	GEWVALNPLRK		missed R-K@10	1	P08603
sp|P08603|CFAH_HUMAN	GEWVALNPLRK		missed R-K@10	1	P08603
sp|P08603|CFAH_HUMAN	GEWVALNPLRK		missed R-K@10	1	P08603
sp|P08603|CFAH_HUMAN	GEWVALNPLRK		missed R-K@10	1	P08603
sp|P08603|CFAH_HUMAN	GEWVALNPLRK		missed R-K@10	1	P08603
sp|P08603|CFAH_HUMAN	GEWVALNPLRK		missed R-K@10	1	P08603
sp|P08603|CFAH_HUMAN	GEWVALNPLRK		missed R-K@10	1	P08603
sp|P08603|CFAH_HUMAN	GEWVALNPLRK		missed R-K@10	1	P08603
sp|P08603|CFAH_HUMAN	GEWVALNPLRK		missed R-K@10	1	P08603
sp|P08603|CFAH_HUMAN	GEWVALNPLRK		missed R-K@10	1	P08603
sp|P08603|CFAH_HUMAN	GKEGWIHTVCINGR	Carbamidomethyl(C)@10	missed K-E@2	1	P08603
sp|P08603|CFAH_HUMAN	GKEGWIHTVCINGR	Carbamidomethyl(C)@10	missed K-E@2	1	P08603
sp|P08603|CFAH_HUMAN	GKEGWIHTVCINGR	Carbamidomethyl(C)@10; Deamidated(N)@12	missed K-E@2	1	P08603
sp|P08603|CFAH_HUMAN	GKEGWIHTVCINGR	FormaldehydeAdduct(W)@5; Carbamidomethyl(C)@10; Deamidated(N)@12	missed K-E@2	1	P08603
sp|P08603|CFAH_HUMAN	GKEGWIHTVCINGR	Carbamidomethyl(C)@10; Deamidated(N)@12	missed K-E@2	1	P08603
sp|P08603|CFAH_HUMAN	GKEGWIHTVCINGR	Carbamidomethyl(C)@10; Deamidated(N)@12	missed K-E@2	1	P08603
sp|P08603|CFAH_HUMAN	GKEGWIHTVCINGR	Carbamidomethyl(C)@10	missed K-E@2	1	P08603
sp|P08603|CFAH_HUMAN	GVVAHMSDSYQYGEEVTYK	Carbamidomethyl@N-term	cleaved H-G@N-term	1	P08603
sp|P08603|CFAH_HUMAN	GWSPAVPCLR	Carbamidomethyl(C)@8	cleaved D-G@N-term	2	P08603, Q02985
sp|P08603|CFAH_HUMAN	GWSPAVPCLR	Carbamidomethyl(C)@8	cleaved D-G@N-term	2	P08603, Q02985
sp|P08603|CFAH_HUMAN	GWSPAVPCLR	Carbamidomethyl(C)@8	cleaved D-G@N-term	2	P08603, Q02985
sp|P08603|CFAH_HUMAN	GWSPAVPCLR	Carbamidomethyl(C)@8	cleaved D-G@N-term	2	P08603, Q02985
sp|P08603|CFAH_HUMAN	GWSPAVPCLR	Carbamidomethyl(C)@8	cleaved D-G@N-term	2	P08603, Q02985
sp|P08603|CFAH_HUMAN	HGGLYHENMR			2	P08603, Q02985
sp|P08603|CFAH_HUMAN	HGGLYHENMR			2	P08603, Q02985
sp|P08603|CFAH_HUMAN	IDVHLVPDR			1	P08603
sp|P08603|CFAH_HUMAN	IDVHLVPDR			1	P08603
sp|P08603|CFAH_HUMAN	IDVHLVPDR			1	P08603
sp|P08603|CFAH_HUMAN	IDVHLVPDR	Carbamidomethyl@N-term		1	P08603
sp|P08603|CFAH_HUMAN	IDVHLVPDR	Carbamidomethyl@N-term		1	P08603
sp|P08603|CFAH_HUMAN	IDVHLVPDR			1	P08603
sp|P08603|CFAH_HUMAN	IDVHLVPDR			1	P08603
sp|P08603|CFAH_HUMAN	IDVHLVPDR			1	P08603
sp|P08603|CFAH_HUMAN	IDVHLVPDR			1	P08603
sp|P08603|CFAH_HUMAN	IDVHLVPDR			1	P08603
sp|P08603|CFAH_HUMAN	IDVHLVPDR			1	P08603
sp|P08603|CFAH_HUMAN	IDVHLVPDR	Carbamidomethyl(H)@4		1	P08603
sp|P08603|CFAH_HUMAN	IEGDEEMHCSDDGFWSK	Oxidation(M)@7; Carbamidomethyl(C)@9		1	P08603
sp|P08603|CFAH_HUMAN	IEGDEEMHCSDDGFWSK	Carbamidomethyl(C)@9		1	P08603
sp|P08603|CFAH_HUMAN	IEGDEEMHCSDDGFWSK	Carbamidomethyl(C)@9		1	P08603
sp|P08603|CFAH_HUMAN	IEGDEEMHCSDDGFWSK	Carbamidomethyl(C)@9		1	P08603
sp|P08603|CFAH_HUMAN	IEGDEEMHCSDDGFWSK	Carbamidomethyl@N-term; Carbamidomethyl(C)@9		1	P08603
sp|P08603|CFAH_HUMAN	IEGDEEMHCSDDGFWSK	Carbamidomethyl(E)@6; Carbamidomethyl(C)@9		1	P08603
sp|P08603|CFAH_HUMAN	IEGDEEMHCSDDGFWSK	Dioxidation(M)@7; Delta:H(2)C(2)(H)@8; Carbamidomethyl(C)@9		1	P08603
sp|P08603|CFAH_HUMAN	IEGDEEMHCSDDGFWSK	Carbamidomethyl(E)@6; Carbamidomethyl(C)@9		1	P08603
sp|P08603|CFAH_HUMAN	IEGDEEMHCSDDGFWSK	Carbamidomethyl(C)@9; Carbamidomethyl(S)@10		1	P08603
sp|P08603|CFAH_HUMAN	IEGDEEMHCSDDGFWSK	Carbamidomethyl@N-term; Carbamidomethyl(C)@9		1	P08603
sp|P08603|CFAH_HUMAN	IEGDEEMHCSDDGFWSK	Carbamidomethyl(E)@6; Carbamidomethyl(C)@9		1	P08603
sp|P08603|CFAH_HUMAN	IEGDEEMHCSDDGFWSK	Carbamidomethyl(E)@6; Carbamidomethyl(C)@9		1	P08603
sp|P08603|CFAH_HUMAN	IEGDEEMHCSDDGFWSK	Carbamidomethyl(E)@6; Carbamidomethyl(C)@9		1	P08603
sp|P08603|CFAH_HUMAN	IEGDEEMHCSDDGFWSK	Oxidation(M)@7; Carbamidomethyl(C)@9		1	P08603
sp|P08603|CFAH_HUMAN	IEGDEEMHCSDDGFWSKEKPK	Carbamidomethyl(C)@9	missed K-E@17	1	P08603
sp|P08603|CFAH_HUMAN	IEGDEEMHCSDDGFWSKEKPK	Carbamidomethyl(C)@9	missed K-E@17	1	P08603
sp|P08603|CFAH_HUMAN	IEGDEEMHCSDDGFWSKEKPK	Carbamidomethyl(C)@9	missed K-E@17	1	P08603
sp|P08603|CFAH_HUMAN	IEGDEEMHCSDDGFWSKEKPK	Carbamidomethyl(C)@9	missed K-E@17	1	P08603
sp|P08603|CFAH_HUMAN	IEGDEEMHCSDDGFWSKEKPK	Carbamidomethyl(C)@9	missed K-E@17	1	P08603
sp|P08603|CFAH_HUMAN	IEGDEEMHCSDDGFWSKEKPK	Carbamidomethyl(C)@9	missed K-E@17	1	P08603
sp|P08603|CFAH_HUMAN	IEGDEEMHCSDDGFWSKEKPK	Carbamidomethyl(C)@9	missed K-E@17	1	P08603
sp|P08603|CFAH_HUMAN	IEGDEEMHCSDDGFWSKEKPK	Carbamidomethyl(C)@9	missed K-E@17	1	P08603
sp|P08603|CFAH_HUMAN	IIYKENER		missed K-E@4	1	P08603
sp|P08603|CFAH_HUMAN	IIYKENER		missed K-E@4	1	P08603
sp|P08603|CFAH_HUMAN	IIYKENERFQYK		missed K-E@4; missed R-F@8	1	P08603
sp|P08603|CFAH_HUMAN	IIYKENERFQYK		missed K-E@4; missed R-F@8	1	P08603
sp|P08603|CFAH_HUMAN	IIYKENERFQYK		missed K-E@4; missed R-F@8	1	P08603
sp|P08603|CFAH_HUMAN	IIYKENERFQYK		missed K-E@4; missed R-F@8	1	P08603
sp|P08603|CFAH_HUMAN	IVSSAMEPDREYHFGQAVR		missed R-E@10	1	P08603
sp|P08603|CFAH_HUMAN	IVSSAMEPDREYHFGQAVR		missed R-E@10	1	P08603
sp|P08603|CFAH_HUMAN	IVSSAMEPDREYHFGQAVR		missed R-E@10	1	P08603
sp|P08603|CFAH_HUMAN	IVSSAMEPDREYHFGQAVR		missed R-E@10	1	P08603
sp|P08603|CFAH_HUMAN	IVSSAMEPDREYHFGQAVR		missed R-E@10	1	P08603
sp|P08603|CFAH_HUMAN	IVSSAMEPDREYHFGQAVR		missed R-E@10	1	P08603
sp|P08603|CFAH_HUMAN	IVSSAMEPDREYHFGQAVR		missed R-E@10	1	P08603
sp|P08603|CFAH_HUMAN	IVSSAMEPDREYHFGQAVR		missed R-E@10	1	P08603
sp|P08603|CFAH_HUMAN	IVSSAMEPDREYHFGQAVR		missed R-E@10	1	P08603
sp|P08603|CFAH_HUMAN	IVSSAMEPDREYHFGQAVR		missed R-E@10	1	P08603
sp|P08603|CFAH_HUMAN	IVSSAMEPDREYHFGQAVR	Carbamidomethyl@N-term	missed R-E@10	1	P08603
sp|P08603|CFAH_HUMAN	IVSSAMEPDREYHFGQAVR	Carbamidomethyl@N-term	missed R-E@10	1	P08603
sp|P08603|CFAH_HUMAN	IVSSAMEPDREYHFGQAVR		missed R-E@10	1	P08603
sp|P08603|CFAH_HUMAN	IVSSAMEPDREYHFGQAVR		missed R-E@10	1	P08603
sp|P08603|CFAH_HUMAN	IVSSAMEPDREYHFGQAVR		missed R-E@10	1	P08603
sp|P08603|CFAH_HUMAN	IVSSAMEPDREYHFGQAVR		missed R-E@10	1	P08603
sp|P08603|CFAH_HUMAN	IVSSAMEPDREYHFGQAVR		missed R-E@10	1	P08603
sp|P08603|CFAH_HUMAN	IVSSAMEPDREYHFGQAVR		missed R-E@10	1	P08603
sp|P08603|CFAH_HUMAN	IVSSAMEPDREYHFGQAVR		missed R-E@10	1	P08603
sp|P08603|CFAH_HUMAN	IVSSAMEPDREYHFGQAVR	Oxidation(M)@6	missed R-E@10	1	P08603
sp|P08603|CFAH_HUMAN	IVSSAMEPDREYHFGQAVR		missed R-E@10	1	P08603
sp|P08603|CFAH_HUMAN	IVSSAMEPDREYHFGQAVR		missed R-E@10	1	P08603
sp|P08603|CFAH_HUMAN	IVSSAMEPDREYHFGQAVR		missed R-E@10	1	P08603
sp|P08603|CFAH_HUMAN	IVSSAMEPDREYHFGQAVR		missed R-E@10	1	P08603
sp|P08603|CFAH_HUMAN	IVSSAMEPDREYHFGQAVR		missed R-E@10	1	P08603
sp|P08603|CFAH_HUMAN	IVSSAMEPDREYHFGQAVR	Oxidation(M)@6	missed R-E@10	1	P08603
sp|P08603|CFAH_HUMAN	IVSSAMEPDREYHFGQAVR		missed R-E@10	1	P08603
sp|P08603|CFAH_HUMAN	IVSSAMEPDREYHFGQAVR	Carbamidomethyl@N-term	missed R-E@10	1	P08603
sp|P08603|CFAH_HUMAN	IVSSAMEPDREYHFGQAVR	Oxidation(M)@6	missed R-E@10	1	P08603
sp|P08603|CFAH_HUMAN	IVSSAMEPDREYHFGQAVR	Dethiomethyl(M)@6	missed R-E@10	1	P08603
sp|P08603|CFAH_HUMAN	IVSSAMEPDREYHFGQAVR	Oxidation(M)@6	missed R-E@10	1	P08603
sp|P08603|CFAH_HUMAN	IVSSAMEPDREYHFGQAVR		missed R-E@10	1	P08603
sp|P08603|CFAH_HUMAN	IVSSAMEPDREYHFGQAVR		missed R-E@10	1	P08603
sp|P08603|CFAH_HUMAN	IVSSAMEPDREYHFGQAVR		missed R-E@10	1	P08603
sp|P08603|CFAH_HUMAN	KAQTTVTCMENGWSPTPR	Carbamidomethyl(C)@8	cleaved P-K@N-term; missed K-A@1	1	P08603
sp|P08603|CFAH_HUMAN	KCYFPYLENGYNQNYGR	Carbamidomethyl(C)@2; Deamidated(N)@9; Deamidated(N)@12	missed K-C@1	2	P08603, Q02985
sp|P08603|CFAH_HUMAN	KCYFPYLENGYNQNYGR	Carbamidomethyl(C)@2; Deamidated(N)@9	missed K-C@1	2	P08603, Q02985
sp|P08603|CFAH_HUMAN	KCYFPYLENGYNQNYGR	Carbamidomethyl(C)@2; Deamidated(N)@12	missed K-C@1	2	P08603, Q02985
sp|P08603|CFAH_HUMAN	KCYFPYLENGYNQNYGR	Carbamidomethyl(C)@2; Deamidated(N)@9	missed K-C@1	2	P08603, Q02985
sp|P08603|CFAH_HUMAN	KCYFPYLENGYNQNYGR	Carbamidomethyl(C)@2; Deamidated(N)@9	missed K-C@1	2	P08603, Q02985
sp|P08603|CFAH_HUMAN	KCYFPYLENGYNQNYGR	Carbamidomethyl(C)@2; Deamidated(N)@9	missed K-C@1	2	P08603, Q02985
sp|P08603|CFAH_HUMAN	KCYFPYLENGYNQNYGR	Carbamidomethyl(C)@2; Oxidation(Y)@15; Arg->Orn(R)@17	missed K-C@1	2	P08603, Q02985
sp|P08603|CFAH_HUMAN	KCYFPYLENGYNQNYGR	Carbamidomethyl(C)@2	missed K-C@1	2	P08603, Q02985
sp|P08603|CFAH_HUMAN	KCYFPYLENGYNQNYGR	Carbamidomethyl(C)@2	missed K-C@1	2	P08603, Q02985
sp|P08603|CFAH_HUMAN	KCYFPYLENGYNQNYGR	Carbamidomethyl(C)@2	missed K-C@1	2	P08603, Q02985
sp|P08603|CFAH_HUMAN	KCYFPYLENGYNQNYGR	Carbamidomethyl(C)@2	missed K-C@1	2	P08603, Q02985
sp|P08603|CFAH_HUMAN	KCYFPYLENGYNQNYGR	Carbamidomethyl(C)@2; Deamidated(N)@9; Oxidation(Y)@15; Arg->Orn(R)@17	missed K-C@1	2	P08603, Q02985
sp|P08603|CFAH_HUMAN	KCYFPYLENGYNQNYGR	Carbamidomethyl(C)@2; Deamidated(N)@9	missed K-C@1	2	P08603, Q02985
sp|P08603|CFAH_HUMAN	KCYFPYLENGYNQNYGR	Carbamidomethyl(C)@2	missed K-C@1	2	P08603, Q02985
sp|P08603|CFAH_HUMAN	KCYFPYLENGYNQNYGR	Carbamidomethyl(C)@2; Deamidated(N)@9	missed K-C@1	2	P08603, Q02985
sp|P08603|CFAH_HUMAN	KCYFPYLENGYNQNYGR	Carbamidomethyl(C)@2; Deamidated(N)@9; Deamidated(N)@12	missed K-C@1	2	P08603, Q02985
sp|P08603|CFAH_HUMAN	KCYFPYLENGYNQNYGR	Carbamidomethyl(C)@2; Deamidated(N)@9; Deamidated(N)@12	missed K-C@1	2	P08603, Q02985
sp|P08603|CFAH_HUMAN	KCYFPYLENGYNQNYGR	Carbamidomethyl(C)@2; Deamidated(N)@9	missed K-C@1	2	P08603, Q02985
sp|P08603|CFAH_HUMAN	KCYFPYLENGYNQNYGR	Carbamidomethyl(C)@2	missed K-C@1	2	P08603, Q02985
sp|P08603|CFAH_HUMAN	KCYFPYLENGYNQNYGR	Carbamidomethyl(C)@2; Deamidated(N)@9	missed K-C@1	2	P08603, Q02985
sp|P08603|CFAH_HUMAN	KCYFPYLENGYNQNYGR	Carbamidomethyl(C)@2; Deamidated(N)@9; Deamidated(N)@12	missed K-C@1	2	P08603, Q02985
sp|P08603|CFAH_HUMAN	KCYFPYLENGYNQNYGR	Carbamidomethyl(C)@2; Deamidated(N)@9	missed K-C@1	2	P08603, Q02985
sp|P08603|CFAH_HUMAN	KCYFPYLENGYNQNYGR	Carbamidomethyl(C)@2; Deamidated(N)@9	missed K-C@1	2	P08603, Q02985
sp|P08603|CFAH_HUMAN	KCYFPYLENGYNQNYGR	Carbamidomethyl(C)@2; Deamidated(N)@9	missed K-C@1	2	P08603, Q02985
sp|P08603|CFAH_HUMAN	KCYFPYLENGYNQNYGR	Carbamidomethyl(C)@2; Deamidated(N)@9	missed K-C@1	2	P08603, Q02985
sp|P08603|CFAH_HUMAN	KCYFPYLENGYNQNYGR	Carbamidomethyl(C)@2	missed K-C@1	2	P08603, Q02985
sp|P08603|CFAH_HUMAN	KCYFPYLENGYNQNYGRK	Carbamidomethyl(C)@2; Deamidated(N)@12	missed K-C@1; missed R-K@17	2	P08603, Q02985
sp|P08603|CFAH_HUMAN	KCYFPYLENGYNQNYGRK	Carbamidomethyl(C)@2; Deamidated(N)@12	missed K-C@1; missed R-K@17	2	P08603, Q02985
sp|P08603|CFAH_HUMAN	KCYFPYLENGYNQNYGRK	Carbamidomethyl(C)@2; Deamidated(N)@12	missed K-C@1; missed R-K@17	2	P08603, Q02985
sp|P08603|CFAH_HUMAN	KCYFPYLENGYNQNYGRK	Carbamidomethyl(C)@2	missed K-C@1; missed R-K@17	2	P08603, Q02985
sp|P08603|CFAH_HUMAN	KCYFPYLENGYNQNYGRK	Carbamidomethyl(C)@2	missed K-C@1; missed R-K@17	2	P08603, Q02985
sp|P08603|CFAH_HUMAN	KDVYKAGEQVTYTCATYYK	Carbamidomethyl(C)@14	missed K-D@1; missed K-A@5	1	P08603
sp|P08603|CFAH_HUMAN	KDVYKAGEQVTYTCATYYK	Carbamidomethyl(C)@14	missed K-D@1; missed K-A@5	1	P08603
sp|P08603|CFAH_HUMAN	KGEWVALNPLR		missed K-G@1	1	P08603
sp|P08603|CFAH_HUMAN	KGEWVALNPLR		missed K-G@1	1	P08603
sp|P08603|CFAH_HUMAN	KGEWVALNPLR		missed K-G@1	1	P08603
sp|P08603|CFAH_HUMAN	KGEWVALNPLR		missed K-G@1	1	P08603
sp|P08603|CFAH_HUMAN	KGEWVALNPLR		missed K-G@1	1	P08603
sp|P08603|CFAH_HUMAN	KGEWVALNPLR		missed K-G@1	1	P08603
sp|P08603|CFAH_HUMAN	KGEWVALNPLR		missed K-G@1	1	P08603
sp|P08603|CFAH_HUMAN	KGEWVALNPLR		missed K-G@1	1	P08603
sp|P08603|CFAH_HUMAN	KGEWVALNPLR		missed K-G@1	1	P08603
sp|P08603|CFAH_HUMAN	KGEWVALNPLR		missed K-G@1	1	P08603
sp|P08603|CFAH_HUMAN	KGEWVALNPLR		missed K-G@1	1	P08603
sp|P08603|CFAH_HUMAN	KGEWVALNPLR		missed K-G@1	1	P08603
sp|P08603|CFAH_HUMAN	KGEWVALNPLR		missed K-G@1	1	P08603
sp|P08603|CFAH_HUMAN	KGEWVALNPLR		missed K-G@1	1	P08603
sp|P08603|CFAH_HUMAN	KGEWVALNPLR		missed K-G@1	1	P08603
sp|P08603|CFAH_HUMAN	KGEWVALNPLR		missed K-G@1	1	P08603
sp|P08603|CFAH_HUMAN	KGEWVALNPLR		missed K-G@1	1	P08603
sp|P08603|CFAH_HUMAN	KGEWVALNPLR		missed K-G@1	1	P08603
sp|P08603|CFAH_HUMAN	KGEWVALNPLR		missed K-G@1	1	P08603
sp|P08603|CFAH_HUMAN	KGEWVALNPLR		missed K-G@1	1	P08603
sp|P08603|CFAH_HUMAN	KGEWVALNPLR	Deamidated(N)@8	missed K-G@1	1	P08603
sp|P08603|CFAH_HUMAN	KGEWVALNPLR		missed K-G@1	1	P08603
sp|P08603|CFAH_HUMAN	KGEWVALNPLR		missed K-G@1	1	P08603
sp|P08603|CFAH_HUMAN	KGEWVALNPLR		missed K-G@1	1	P08603
sp|P08603|CFAH_HUMAN	KGEWVALNPLR		missed K-G@1	1	P08603
sp|P08603|CFAH_HUMAN	KGEWVALNPLR		missed K-G@1	1	P08603
sp|P08603|CFAH_HUMAN	KGEWVALNPLR		missed K-G@1	1	P08603
sp|P08603|CFAH_HUMAN	KGEWVALNPLR		missed K-G@1	1	P08603
sp|P08603|CFAH_HUMAN	KGEWVALNPLR		missed K-G@1	1	P08603
sp|P08603|CFAH_HUMAN	KGEWVALNPLR		missed K-G@1	1	P08603
sp|P08603|CFAH_HUMAN	KGEWVALNPLR		missed K-G@1	1	P08603
sp|P08603|CFAH_HUMAN	KGEWVALNPLR		missed K-G@1	1	P08603
sp|P08603|CFAH_HUMAN	KGEWVALNPLR		missed K-G@1	1	P08603
sp|P08603|CFAH_HUMAN	KGEWVALNPLR		missed K-G@1	1	P08603
sp|P08603|CFAH_HUMAN	KGEWVALNPLR		missed K-G@1	1	P08603
sp|P08603|CFAH_HUMAN	KGEWVALNPLR		missed K-G@1	1	P08603
sp|P08603|CFAH_HUMAN	KGEWVALNPLR		missed K-G@1	1	P08603
sp|P08603|CFAH_HUMAN	KGEWVALNPLR		missed K-G@1	1	P08603
sp|P08603|CFAH_HUMAN	KGEWVALNPLR		missed K-G@1	1	P08603
sp|P08603|CFAH_HUMAN	KGEWVALNPLR		missed K-G@1	1	P08603
sp|P08603|CFAH_HUMAN	KGEWVALNPLR		missed K-G@1	1	P08603
sp|P08603|CFAH_HUMAN	KGEWVALNPLR		missed K-G@1	1	P08603
sp|P08603|CFAH_HUMAN	KGEWVALNPLR		missed K-G@1	1	P08603
sp|P08603|CFAH_HUMAN	KGEWVALNPLR		missed K-G@1	1	P08603
sp|P08603|CFAH_HUMAN	KGEWVALNPLR		missed K-G@1	1	P08603
sp|P08603|CFAH_HUMAN	KGEWVALNPLR		missed K-G@1	1	P08603
sp|P08603|CFAH_HUMAN	KGEWVALNPLR		missed K-G@1	1	P08603
sp|P08603|CFAH_HUMAN	KGEWVALNPLR		missed K-G@1	1	P08603
sp|P08603|CFAH_HUMAN	KGEWVALNPLR	Oxidation(W)@4	missed K-G@1	1	P08603
sp|P08603|CFAH_HUMAN	KGEWVALNPLR		missed K-G@1	1	P08603
sp|P08603|CFAH_HUMAN	KGEWVALNPLR		missed K-G@1	1	P08603
sp|P08603|CFAH_HUMAN	KGEWVALNPLR		missed K-G@1	1	P08603
sp|P08603|CFAH_HUMAN	KGEWVALNPLR		missed K-G@1	1	P08603
sp|P08603|CFAH_HUMAN	KGEWVALNPLR		missed K-G@1	1	P08603
sp|P08603|CFAH_HUMAN	KGEWVALNPLR		missed K-G@1	1	P08603
sp|P08603|CFAH_HUMAN	KGEWVALNPLRK		missed K-G@1; missed R-K@11	1	P08603
sp|P08603|CFAH_HUMAN	KGEWVALNPLRK		missed K-G@1; missed R-K@11	1	P08603
sp|P08603|CFAH_HUMAN	KGEWVALNPLRK		missed K-G@1; missed R-K@11	1	P08603
sp|P08603|CFAH_HUMAN	KGEWVALNPLRK		missed K-G@1; missed R-K@11	1	P08603
sp|P08603|CFAH_HUMAN	KGEWVALNPLRK		missed K-G@1; missed R-K@11	1	P08603
sp|P08603|CFAH_HUMAN	KGEWVALNPLRK		missed K-G@1; missed R-K@11	1	P08603
sp|P08603|CFAH_HUMAN	KGEWVALNPLRK		missed K-G@1; missed R-K@11	1	P08603
sp|P08603|CFAH_HUMAN	KGEWVALNPLRK		missed K-G@1; missed R-K@11	1	P08603
sp|P08603|CFAH_HUMAN	KGEWVALNPLRK		missed K-G@1; missed R-K@11	1	P08603
sp|P08603|CFAH_HUMAN	KGEWVALNPLRK		missed K-G@1; missed R-K@11	1	P08603
sp|P08603|CFAH_HUMAN	KGEWVALNPLRK		missed K-G@1; missed R-K@11	1	P08603
sp|P08603|CFAH_HUMAN	KGEWVALNPLRK		missed K-G@1; missed R-K@11	1	P08603
sp|P08603|CFAH_HUMAN	KGEWVALNPLRK		missed K-G@1; missed R-K@11	1	P08603
sp|P08603|CFAH_HUMAN	KGEWVALNPLRK		missed K-G@1; missed R-K@11	1	P08603
sp|P08603|CFAH_HUMAN	KGEWVALNPLRK		missed K-G@1; missed R-K@11	1	P08603
sp|P08603|CFAH_HUMAN	KGEWVALNPLRK		missed K-G@1; missed R-K@11	1	P08603
sp|P08603|CFAH_HUMAN	KGEWVALNPLRK		missed K-G@1; missed R-K@11	1	P08603
sp|P08603|CFAH_HUMAN	KGEWVALNPLRK		missed K-G@1; missed R-K@11	1	P08603
sp|P08603|CFAH_HUMAN	KGEWVALNPLRK		missed K-G@1; missed R-K@11	1	P08603
sp|P08603|CFAH_HUMAN	KGEWVALNPLRK		missed K-G@1; missed R-K@11	1	P08603
sp|P08603|CFAH_HUMAN	KGEWVALNPLRK		missed K-G@1; missed R-K@11	1	P08603
sp|P08603|CFAH_HUMAN	KGEWVALNPLRK		missed K-G@1; missed R-K@11	1	P08603
sp|P08603|CFAH_HUMAN	KGEWVALNPLRK		missed K-G@1; missed R-K@11	1	P08603
sp|P08603|CFAH_HUMAN	KGEWVALNPLRK		missed K-G@1; missed R-K@11	1	P08603
sp|P08603|CFAH_HUMAN	KGEWVALNPLRK		missed K-G@1; missed R-K@11	1	P08603
sp|P08603|CFAH_HUMAN	KGEWVALNPLRK		missed K-G@1; missed R-K@11	1	P08603
sp|P08603|CFAH_HUMAN	KGEWVALNPLRK		missed K-G@1; missed R-K@11	1	P08603
sp|P08603|CFAH_HUMAN	KGEWVALNPLRK		missed K-G@1; missed R-K@11	1	P08603
sp|P08603|CFAH_HUMAN	KGEWVALNPLRK		missed K-G@1; missed R-K@11	1	P08603
sp|P08603|CFAH_HUMAN	KGEWVALNPLRK		missed K-G@1; missed R-K@11	1	P08603
sp|P08603|CFAH_HUMAN	KGEWVALNPLRK		missed K-G@1; missed R-K@11	1	P08603
sp|P08603|CFAH_HUMAN	KGEWVALNPLRK		missed K-G@1; missed R-K@11	1	P08603
sp|P08603|CFAH_HUMAN	KGEWVALNPLRK		missed K-G@1; missed R-K@11	1	P08603
sp|P08603|CFAH_HUMAN	KGEWVALNPLRK		missed K-G@1; missed R-K@11	1	P08603
sp|P08603|CFAH_HUMAN	KGEWVALNPLRK		missed K-G@1; missed R-K@11	1	P08603
sp|P08603|CFAH_HUMAN	KGEWVALNPLRK	Oxidation(W)@4	missed K-G@1; missed R-K@11	1	P08603
sp|P08603|CFAH_HUMAN	KGEWVALNPLRK		missed K-G@1; missed R-K@11	1	P08603
sp|P08603|CFAH_HUMAN	KGEWVALNPLRK		missed K-G@1; missed R-K@11	1	P08603
sp|P08603|CFAH_HUMAN	KGEWVALNPLRK	Carbamyl@N-term	missed K-G@1; missed R-K@11	1	P08603
sp|P08603|CFAH_HUMAN	KGEWVALNPLRK		missed K-G@1; missed R-K@11	1	P08603
sp|P08603|CFAH_HUMAN	KGEWVALNPLRK		missed K-G@1; missed R-K@11	1	P08603
sp|P08603|CFAH_HUMAN	KGEWVALNPLRK		missed K-G@1; missed R-K@11	1	P08603
sp|P08603|CFAH_HUMAN	KKDQYKVGEVLK		missed K-K@1; missed K-D@2; missed K-V@6	1	P08603
sp|P08603|CFAH_HUMAN	KKDQYKVGEVLK		missed K-K@1; missed K-D@2; missed K-V@6	1	P08603
sp|P08603|CFAH_HUMAN	LGYVTADGETSGSITCGK	Carbamidomethyl(C)@16		1	P08603
sp|P08603|CFAH_HUMAN	LGYVTADGETSGSITCGK	Carbamidomethyl(C)@16		1	P08603
sp|P08603|CFAH_HUMAN	LGYVTADGETSGSITCGK	Carbamidomethyl(C)@16		1	P08603
sp|P08603|CFAH_HUMAN	LGYVTADGETSGSITCGK	Carbamidomethyl(C)@16		1	P08603
sp|P08603|CFAH_HUMAN	LGYVTADGETSGSITCGK	Carbamidomethyl(C)@16		1	P08603
sp|P08603|CFAH_HUMAN	LGYVTADGETSGSITCGK	Carbamidomethyl(C)@16		1	P08603
sp|P08603|CFAH_HUMAN	LGYVTADGETSGSITCGK	Carbamidomethyl(C)@16		1	P08603
sp|P08603|CFAH_HUMAN	LGYVTADGETSGSITCGK	Carbamidomethyl(C)@16		1	P08603
sp|P08603|CFAH_HUMAN	LGYVTADGETSGSITCGK	Carbamidomethyl(C)@16		1	P08603
sp|P08603|CFAH_HUMAN	LGYVTADGETSGSITCGK	Carbamidomethyl(C)@16		1	P08603
sp|P08603|CFAH_HUMAN	LGYVTADGETSGSITCGK	Carbamidomethyl(C)@16		1	P08603
sp|P08603|CFAH_HUMAN	LGYVTADGETSGSITCGK	Carbamidomethyl(C)@16		1	P08603
sp|P08603|CFAH_HUMAN	LGYVTADGETSGSITCGK	Carbamidomethyl(C)@16		1	P08603
sp|P08603|CFAH_HUMAN	LGYVTADGETSGSITCGK	Carbamidomethyl(C)@16		1	P08603
sp|P08603|CFAH_HUMAN	LGYVTADGETSGSITCGK	Carbamidomethyl(C)@16		1	P08603
sp|P08603|CFAH_HUMAN	LGYVTADGETSGSITCGK	Carbamidomethyl(C)@16		1	P08603
sp|P08603|CFAH_HUMAN	LGYVTADGETSGSITCGK	Carbamidomethyl(C)@16		1	P08603
sp|P08603|CFAH_HUMAN	LGYVTADGETSGSITCGK	Carbamidomethyl(C)@16		1	P08603
sp|P08603|CFAH_HUMAN	LGYVTADGETSGSITCGK	Carbamidomethyl(C)@16		1	P08603
sp|P08603|CFAH_HUMAN	LGYVTADGETSGSITCGK	Carbamidomethyl(C)@16		1	P08603
sp|P08603|CFAH_HUMAN	LGYVTADGETSGSITCGK	Carbamidomethyl(C)@16		1	P08603
sp|P08603|CFAH_HUMAN	LGYVTADGETSGSITCGK	Carbamidomethyl(C)@16		1	P08603
sp|P08603|CFAH_HUMAN	LGYVTADGETSGSITCGK	Carbamidomethyl(C)@16		1	P08603
sp|P08603|CFAH_HUMAN	LGYVTADGETSGSITCGK	Iodo(Y)@3; Carbamidomethyl(C)@16		1	P08603
sp|P08603|CFAH_HUMAN	LGYVTADGETSGSITCGK	Iodo(Y)@3; Carbamidomethyl(C)@16		1	P08603
sp|P08603|CFAH_HUMAN	LGYVTADGETSGSITCGK	Carbamidomethyl(C)@16		1	P08603
sp|P08603|CFAH_HUMAN	LGYVTADGETSGSITCGK	Carbamidomethyl(C)@16		1	P08603
sp|P08603|CFAH_HUMAN	LGYVTADGETSGSITCGK	Iodo(Y)@3; Carbamidomethyl(C)@16		1	P08603
sp|P08603|CFAH_HUMAN	LGYVTADGETSGSITCGK	Iodo(Y)@3; Carbamidomethyl(C)@16		1	P08603
sp|P08603|CFAH_HUMAN	LGYVTADGETSGSITCGK	Carbamidomethyl(C)@16		1	P08603
sp|P08603|CFAH_HUMAN	LGYVTADGETSGSITCGK	Carbamidomethyl(C)@16		1	P08603
sp|P08603|CFAH_HUMAN	LGYVTADGETSGSITCGK	Carbamidomethyl(C)@16		1	P08603
sp|P08603|CFAH_HUMAN	LGYVTADGETSGSITCGK	Carbamidomethyl(C)@16		1	P08603
sp|P08603|CFAH_HUMAN	LGYVTADGETSGSITCGK	Carbamidomethyl(C)@16		1	P08603
sp|P08603|CFAH_HUMAN	LGYVTADGETSGSITCGK	Carbamidomethyl(C)@16		1	P08603
sp|P08603|CFAH_HUMAN	LGYVTADGETSGSITCGK	Carbamidomethyl(C)@16		1	P08603
sp|P08603|CFAH_HUMAN	LGYVTADGETSGSITCGK	Carbamidomethyl(C)@16		1	P08603
sp|P08603|CFAH_HUMAN	LGYVTADGETSGSITCGK	Carbamidomethyl(C)@16		1	P08603
sp|P08603|CFAH_HUMAN	LGYVTADGETSGSITCGK	Carbamidomethyl(C)@16		1	P08603
sp|P08603|CFAH_HUMAN	LGYVTADGETSGSITCGK	Carbamidomethyl(C)@16		1	P08603
sp|P08603|CFAH_HUMAN	LGYVTADGETSGSITCGK	Carbamidomethyl(C)@16		1	P08603
sp|P08603|CFAH_HUMAN	LGYVTADGETSGSITCGK	Carbamidomethyl(C)@16		1	P08603
sp|P08603|CFAH_HUMAN	LGYVTADGETSGSITCGK	Carbamidomethyl(C)@16		1	P08603
sp|P08603|CFAH_HUMAN	LGYVTADGETSGSITCGK	Carbamidomethyl(C)@16		1	P08603
sp|P08603|CFAH_HUMAN	LGYVTADGETSGSITCGK	Carbamidomethyl(C)@16		1	P08603
sp|P08603|CFAH_HUMAN	LGYVTADGETSGSITCGK	Carbamidomethyl(C)@16		1	P08603
sp|P08603|CFAH_HUMAN	LGYVTADGETSGSITCGK	Carbamidomethyl(C)@16		1	P08603
sp|P08603|CFAH_HUMAN	LGYVTADGETSGSITCGK	Carbamidomethyl(C)@16		1	P08603
sp|P08603|CFAH_HUMAN	LGYVTADGETSGSITCGK	Carbamidomethyl(C)@16		1	P08603
sp|P08603|CFAH_HUMAN	LGYVTADGETSGSITCGK	Carbamidomethyl(C)@16		1	P08603
sp|P08603|CFAH_HUMAN	LGYVTADGETSGSITCGK	Carbamidomethyl(C)@16		1	P08603
sp|P08603|CFAH_HUMAN	LGYVTADGETSGSITCGK	Carbamidomethyl@N-term; Carbamidomethyl(C)@16		1	P08603
sp|P08603|CFAH_HUMAN	LGYVTADGETSGSITCGK	Carbamidomethyl@N-term; Carbamidomethyl(C)@16		1	P08603
sp|P08603|CFAH_HUMAN	LGYVTADGETSGSITCGK	Carbamidomethyl(C)@16		1	P08603
sp|P08603|CFAH_HUMAN	LGYVTADGETSGSITCGK	Carbamidomethyl(C)@16		1	P08603
sp|P08603|CFAH_HUMAN	LGYVTADGETSGSITCGK	Carbamidomethyl@N-term; Carbamidomethyl(C)@16		1	P08603
sp|P08603|CFAH_HUMAN	LGYVTADGETSGSITCGK	Carbamidomethyl(C)@16		1	P08603
sp|P08603|CFAH_HUMAN	LGYVTADGETSGSITCGK	Dehydrated(D)@7; Carbamidomethyl(C)@16		1	P08603
sp|P08603|CFAH_HUMAN	LGYVTADGETSGSITCGK	Carbamidomethyl(C)@16		1	P08603
sp|P08603|CFAH_HUMAN	LGYVTADGETSGSITCGK	Carbamidomethyl(C)@16		1	P08603
sp|P08603|CFAH_HUMAN	LGYVTADGETSGSITCGK	Carbamidomethyl(C)@16		1	P08603
sp|P08603|CFAH_HUMAN	LGYVTADGETSGSITCGK	Carbamidomethyl(C)@16		1	P08603
sp|P08603|CFAH_HUMAN	LGYVTADGETSGSITCGK	Carbamidomethyl(C)@16		1	P08603
sp|P08603|CFAH_HUMAN	LGYVTADGETSGSITCGK	Carbamidomethyl(C)@16		1	P08603
sp|P08603|CFAH_HUMAN	LGYVTADGETSGSITCGK	Carbamidomethyl(C)@16		1	P08603
sp|P08603|CFAH_HUMAN	LGYVTADGETSGSITCGK	Carbamidomethyl(C)@16		1	P08603
sp|P08603|CFAH_HUMAN	LGYVTADGETSGSITCGK	Carbamidomethyl(C)@16		1	P08603
sp|P08603|CFAH_HUMAN	LGYVTADGETSGSITCGK	Carbamidomethyl(C)@16		1	P08603
sp|P08603|CFAH_HUMAN	LGYVTADGETSGSITCGKDGWSAQPTCIK	Carbamidomethyl(C)@16; Carbamidomethyl(C)@27	missed K-D@18	1	P08603
sp|P08603|CFAH_HUMAN	LGYVTADGETSGSITCGKDGWSAQPTCIK	Carbamidomethyl(C)@16; Carbamidomethyl(C)@27	missed K-D@18	1	P08603
sp|P08603|CFAH_HUMAN	LGYVTADGETSGSITCGKDGWSAQPTCIK	Carbamidomethyl(C)@16; Carbamidomethyl(C)@27	missed K-D@18	1	P08603
sp|P08603|CFAH_HUMAN	LGYVTADGETSGSITCGKDGWSAQPTCIK	Carbamidomethyl(C)@16; Carbamidomethyl(C)@27	missed K-D@18	1	P08603
sp|P08603|CFAH_HUMAN	LGYVTADGETSGSITCGKDGWSAQPTCIK	Carbamidomethyl(C)@16; Carbamidomethyl(C)@27	missed K-D@18	1	P08603
sp|P08603|CFAH_HUMAN	LGYVTADGETSGSITCGKDGWSAQPTCIK	Carbamidomethyl(C)@16; Carbamidomethyl(C)@27	missed K-D@18	1	P08603
sp|P08603|CFAH_HUMAN	LGYVTADGETSGSITCGKDGWSAQPTCIK	Carbamidomethyl(C)@16; Carbamidomethyl(C)@27	missed K-D@18	1	P08603
sp|P08603|CFAH_HUMAN	LGYVTADGETSGSITCGKDGWSAQPTCIK	Carbamidomethyl(C)@16; Carbamidomethyl(C)@27	missed K-D@18	1	P08603
sp|P08603|CFAH_HUMAN	LGYVTADGETSGSITCGKDGWSAQPTCIK	Carbamidomethyl(C)@16; Carbamidomethyl(C)@27	missed K-D@18	1	P08603
sp|P08603|CFAH_HUMAN	LGYVTADGETSGSITCGKDGWSAQPTCIK	Carbamidomethyl(C)@16; Carbamidomethyl(C)@27	missed K-D@18	1	P08603
sp|P08603|CFAH_HUMAN	LGYVTADGETSGSITCGKDGWSAQPTCIK	Carbamidomethyl(C)@16; Carbamidomethyl(C)@27	missed K-D@18	1	P08603
sp|P08603|CFAH_HUMAN	LGYVTADGETSGSITCGKDGWSAQPTCIK	Carbamidomethyl(C)@16; Carbamidomethyl(C)@27	missed K-D@18	1	P08603
sp|P08603|CFAH_HUMAN	LGYVTADGETSGSITCGKDGWSAQPTCIK	Carbamidomethyl(C)@16; Carbamidomethyl(C)@27	missed K-D@18	1	P08603
sp|P08603|CFAH_HUMAN	LGYVTADGETSGSITCGKDGWSAQPTCIK	Carbamidomethyl(C)@16; Carbamidomethyl(C)@27	missed K-D@18	1	P08603
sp|P08603|CFAH_HUMAN	LGYVTADGETSGSITCGKDGWSAQPTCIK	Carbamidomethyl(C)@16; Carbamidomethyl(C)@27	missed K-D@18	1	P08603
sp|P08603|CFAH_HUMAN	LGYVTADGETSGSITCGKDGWSAQPTCIK	Carbamidomethyl(C)@16; Carbamidomethyl(C)@27	missed K-D@18	1	P08603
sp|P08603|CFAH_HUMAN	LGYVTADGETSGSITCGKDGWSAQPTCIK	Carbamidomethyl(C)@16; Carbamidomethyl(C)@27	missed K-D@18	1	P08603
sp|P08603|CFAH_HUMAN	LGYVTADGETSGSITCGKDGWSAQPTCIK	Carbamidomethyl(C)@16; Carbamidomethyl(C)@27	missed K-D@18	1	P08603
sp|P08603|CFAH_HUMAN	LGYVTADGETSGSITCGKDGWSAQPTCIK	Carbamidomethyl(C)@16; Carbamidomethyl(C)@27	missed K-D@18	1	P08603
sp|P08603|CFAH_HUMAN	LGYVTADGETSGSITCGKDGWSAQPTCIK	Carbamidomethyl(C)@16; Carbamidomethyl(C)@27	missed K-D@18	1	P08603
sp|P08603|CFAH_HUMAN	LGYVTADGETSGSITCGKDGWSAQPTCIK	Carbamidomethyl(C)@16; Carbamidomethyl(C)@27	missed K-D@18	1	P08603
sp|P08603|CFAH_HUMAN	LGYVTADGETSGSITCGKDGWSAQPTCIK	Carbamidomethyl(C)@16; Carbamidomethyl(C)@27	missed K-D@18	1	P08603
sp|P08603|CFAH_HUMAN	LGYVTADGETSGSITCGKDGWSAQPTCIK	Carbamidomethyl(C)@16; Carbamidomethyl(C)@27	missed K-D@18	1	P08603
sp|P08603|CFAH_HUMAN	LGYVTADGETSGSITCGKDGWSAQPTCIK	Carbamidomethyl(C)@16; Carbamidomethyl(C)@27	missed K-D@18	1	P08603
sp|P08603|CFAH_HUMAN	LGYVTADGETSGSITCGKDGWSAQPTCIK	Carbamidomethyl(C)@16; Carbamidomethyl(C)@27	missed K-D@18	1	P08603
sp|P08603|CFAH_HUMAN	LGYVTADGETSGSITCGKDGWSAQPTCIK	Carbamidomethyl(C)@16; Carbamidomethyl(C)@27	missed K-D@18	1	P08603
sp|P08603|CFAH_HUMAN	LGYVTADGETSGSITCGKDGWSAQPTCIK	Carbamidomethyl(C)@16; Carbamidomethyl(C)@27	missed K-D@18	1	P08603
sp|P08603|CFAH_HUMAN	LGYVTADGETSGSITCGKDGWSAQPTCIK	Carbamidomethyl(C)@16; Carbamidomethyl(C)@27	missed K-D@18	1	P08603
sp|P08603|CFAH_HUMAN	LGYVTADGETSGSITCGKDGWSAQPTCIK	Carbamidomethyl(C)@16; Carbamidomethyl(C)@27	missed K-D@18	1	P08603
sp|P08603|CFAH_HUMAN	LGYVTADGETSGSITCGKDGWSAQPTCIK	Carbamidomethyl(C)@16; Carbamidomethyl(C)@27	missed K-D@18	1	P08603
sp|P08603|CFAH_HUMAN	LGYVTADGETSGSITCGKDGWSAQPTCIK	Carbamidomethyl(C)@16; Carbamidomethyl(C)@27	missed K-D@18	1	P08603
sp|P08603|CFAH_HUMAN	LGYVTADGETSGSITCGKDGWSAQPTCIK	Carbamidomethyl(C)@16; Deamidated(Q)@24; Carbamidomethyl(C)@27	missed K-D@18	1	P08603
sp|P08603|CFAH_HUMAN	LGYVTADGETSGSITCGKDGWSAQPTCIK	Carbamidomethyl(C)@16; Carbamidomethyl(C)@27	missed K-D@18	1	P08603
sp|P08603|CFAH_HUMAN	LGYVTADGETSGSITCGKDGWSAQPTCIK	Carbamidomethyl(C)@16; Carbamidomethyl(C)@27	missed K-D@18	1	P08603
sp|P08603|CFAH_HUMAN	LGYVTADGETSGSITCGKDGWSAQPTCIK	Carbamidomethyl(C)@16; Carbamidomethyl(C)@27	missed K-D@18	1	P08603
sp|P08603|CFAH_HUMAN	LGYVTADGETSGSITCGKDGWSAQPTCIK	Carbamidomethyl(C)@16; Carbamidomethyl(C)@27	missed K-D@18	1	P08603
sp|P08603|CFAH_HUMAN	LGYVTADGETSGSITCGKDGWSAQPTCIK	Carbamidomethyl(C)@16; Carbamidomethyl(C)@27	missed K-D@18	1	P08603
sp|P08603|CFAH_HUMAN	LGYVTADGETSGSITCGKDGWSAQPTCIK	Carbamidomethyl(C)@16; Carbamidomethyl(C)@27	missed K-D@18	1	P08603
sp|P08603|CFAH_HUMAN	LGYVTADGETSGSITCGKDGWSAQPTCIK	Carbamidomethyl(C)@16; Carbamidomethyl(C)@27	missed K-D@18	1	P08603
sp|P08603|CFAH_HUMAN	LGYVTADGETSGSITCGKDGWSAQPTCIK	Carbamidomethyl(C)@16; Carbamidomethyl(C)@27	missed K-D@18	1	P08603
sp|P08603|CFAH_HUMAN	LGYVTADGETSGSITCGKDGWSAQPTCIK	Carbamidomethyl(C)@16; Carbamidomethyl(C)@27	missed K-D@18	1	P08603
sp|P08603|CFAH_HUMAN	LGYVTADGETSGSITCGKDGWSAQPTCIK	Carbamidomethyl(C)@16; Carbamidomethyl(C)@27	missed K-D@18	1	P08603
sp|P08603|CFAH_HUMAN	LGYVTADGETSGSITCGKDGWSAQPTCIK	Carbamidomethyl(C)@16; Carbamidomethyl(C)@27	missed K-D@18	1	P08603
sp|P08603|CFAH_HUMAN	LGYVTADGETSGSITCGKDGWSAQPTCIK	Carbamidomethyl(C)@16; Carbamidomethyl(C)@27	missed K-D@18	1	P08603
sp|P08603|CFAH_HUMAN	LGYVTADGETSGSITCGKDGWSAQPTCIK	Carbamidomethyl(C)@16; Carbamidomethyl(C)@27	missed K-D@18	1	P08603
sp|P08603|CFAH_HUMAN	LGYVTADGETSGSITCGKDGWSAQPTCIK	Carbamidomethyl(C)@16; Carbamidomethyl(C)@27	missed K-D@18	1	P08603
sp|P08603|CFAH_HUMAN	LGYVTADGETSGSITCGKDGWSAQPTCIK	Carbamidomethyl(C)@16; Carbamidomethyl(C)@27	missed K-D@18	1	P08603
sp|P08603|CFAH_HUMAN	LGYVTADGETSGSITCGKDGWSAQPTCIK	Carbamidomethyl(C)@16; Carbamidomethyl(C)@27	missed K-D@18	1	P08603
sp|P08603|CFAH_HUMAN	LGYVTADGETSGSITCGKDGWSAQPTCIK	Carbamidomethyl(C)@16; Carbamidomethyl(C)@27	missed K-D@18	1	P08603
sp|P08603|CFAH_HUMAN	LGYVTADGETSGSITCGKDGWSAQPTCIK	Carbamidomethyl(C)@16; Carbamidomethyl(C)@27	missed K-D@18	1	P08603
sp|P08603|CFAH_HUMAN	LGYVTADGETSGSITCGKDGWSAQPTCIK	Carbamidomethyl(C)@16; Carbamidomethyl(C)@27	missed K-D@18	1	P08603
sp|P08603|CFAH_HUMAN	LGYVTADGETSGSITCGKDGWSAQPTCIK	Carbamidomethyl(C)@16; Carbamidomethyl(C)@27	missed K-D@18	1	P08603
sp|P08603|CFAH_HUMAN	LGYVTADGETSGSITCGKDGWSAQPTCIK	Carbamidomethyl(C)@16; Carbamidomethyl(C)@27	missed K-D@18	1	P08603
sp|P08603|CFAH_HUMAN	LSYTCEGGFR	Carbamidomethyl(C)@5		1	P08603
sp|P08603|CFAH_HUMAN	LSYTCEGGFR	Carbamidomethyl(C)@5		1	P08603
sp|P08603|CFAH_HUMAN	LSYTCEGGFR	Carbamidomethyl(C)@5		1	P08603
sp|P08603|CFAH_HUMAN	LSYTCEGGFR	Carbamidomethyl(C)@5		1	P08603
sp|P08603|CFAH_HUMAN	LSYTCEGGFR	Carbamidomethyl(C)@5		1	P08603
sp|P08603|CFAH_HUMAN	LSYTCEGGFR	Carbamidomethyl(C)@5		1	P08603
sp|P08603|CFAH_HUMAN	LSYTCEGGFR	Carbamidomethyl(C)@5		1	P08603
sp|P08603|CFAH_HUMAN	LSYTCEGGFR	Carbamidomethyl(C)@5		1	P08603
sp|P08603|CFAH_HUMAN	LSYTCEGGFR	Carbamidomethyl(C)@5		1	P08603
sp|P08603|CFAH_HUMAN	LSYTCEGGFR	Iodo(Y)@3; Carbamidomethyl(C)@5		1	P08603
sp|P08603|CFAH_HUMAN	LSYTCEGGFR	Carbamidomethyl@N-term; Carbamidomethyl(C)@5		1	P08603
sp|P08603|CFAH_HUMAN	MSDSYQYGEEVTYK		cleaved H-M@N-term	1	P08603
sp|P08603|CFAH_HUMAN	MSDSYQYGEEVTYK		cleaved H-M@N-term	1	P08603
sp|P08603|CFAH_HUMAN	NGFYPATR	Deamidated(N)@1		1	P08603
sp|P08603|CFAH_HUMAN	NGFYPATR	Deamidated(N)@1		1	P08603
sp|P08603|CFAH_HUMAN	NGFYPATR	Deamidated(N)@1		1	P08603
sp|P08603|CFAH_HUMAN	NGFYPATR			1	P08603
sp|P08603|CFAH_HUMAN	NGFYPATR	Deamidated(N)@1		1	P08603
sp|P08603|CFAH_HUMAN	NGFYPATR	Deamidated(N)@1		1	P08603
sp|P08603|CFAH_HUMAN	NGFYPATR			1	P08603
sp|P08603|CFAH_HUMAN	NGFYPATR			1	P08603
sp|P08603|CFAH_HUMAN	NGFYPATR			1	P08603
sp|P08603|CFAH_HUMAN	NGFYPATR			1	P08603
sp|P08603|CFAH_HUMAN	NGFYPATR			1	P08603
sp|P08603|CFAH_HUMAN	NGQWSEPPK	Deamidated(N)@1		3	P08603, P36980, Q03591
sp|P08603|CFAH_HUMAN	NGQWSEPPK	Deamidated(N)@1		3	P08603, P36980, Q03591
sp|P08603|CFAH_HUMAN	NGQWSEPPK			3	P08603, P36980, Q03591
sp|P08603|CFAH_HUMAN	NGQWSEPPK	Deamidated(N)@1		3	P08603, P36980, Q03591
sp|P08603|CFAH_HUMAN	NGQWSEPPK	Deamidated(N)@1		3	P08603, P36980, Q03591
sp|P08603|CFAH_HUMAN	NGQWSEPPK			3	P08603, P36980, Q03591
sp|P08603|CFAH_HUMAN	NGQWSEPPK	Deamidated(N)@1		3	P08603, P36980, Q03591
sp|P08603|CFAH_HUMAN	NGQWSEPPKCLHPCVISR	Carbamidomethyl(C)@10; Carbamidomethyl(C)@14	missed K-C@9	2	P08603, Q03591
sp|P08603|CFAH_HUMAN	NGQWSEPPKCLHPCVISR	Carbamidomethyl(C)@10; Carbamidomethyl(C)@14	missed K-C@9	2	P08603, Q03591
sp|P08603|CFAH_HUMAN	NGQWSEPPKCLHPCVISR	Carbamidomethyl(C)@10; Carbamidomethyl(C)@14	missed K-C@9	2	P08603, Q03591
sp|P08603|CFAH_HUMAN	NGQWSEPPKCLHPCVISR	Carbamidomethyl(C)@10; Carbamidomethyl(C)@14	missed K-C@9	2	P08603, Q03591
sp|P08603|CFAH_HUMAN	NGQWSEPPKCLHPCVISR	Carbamidomethyl(C)@10; Carbamidomethyl(C)@14	missed K-C@9	2	P08603, Q03591
sp|P08603|CFAH_HUMAN	NGQWSEPPKCLHPCVISR	Carbamidomethyl(C)@10; Carbamidomethyl(C)@14	missed K-C@9	2	P08603, Q03591
sp|P08603|CFAH_HUMAN	NGQWSEPPKCLHPCVISR	Carbamidomethyl(C)@10; Carbamidomethyl(C)@14	missed K-C@9	2	P08603, Q03591
sp|P08603|CFAH_HUMAN	NGQWSEPPKCLHPCVISR	Carbamidomethyl(C)@10; Carbamidomethyl(C)@14	missed K-C@9	2	P08603, Q03591
sp|P08603|CFAH_HUMAN	NGQWSEPPKCLHPCVISR	Carbamidomethyl(C)@10; Carbamidomethyl(C)@14	missed K-C@9	2	P08603, Q03591
sp|P08603|CFAH_HUMAN	NGQWSEPPKCLHPCVISR	Carbamidomethyl(C)@10; Carbamidomethyl(C)@14	missed K-C@9	2	P08603, Q03591
sp|P08603|CFAH_HUMAN	NGQWSEPPKCLHPCVISR	Carbamidomethyl(C)@10; Carbamidomethyl(C)@14	missed K-C@9	2	P08603, Q03591
sp|P08603|CFAH_HUMAN	NGQWSEPPKCLHPCVISR	Carbamidomethyl(C)@10; Carbamidomethyl(C)@14	missed K-C@9	2	P08603, Q03591
sp|P08603|CFAH_HUMAN	NGQWSEPPKCLHPCVISR	Deamidated(N)@1; Carbamidomethyl(C)@10; Carbamidomethyl(C)@14	missed K-C@9	2	P08603, Q03591
sp|P08603|CFAH_HUMAN	NGQWSEPPKCLHPCVISR	Deamidated(N)@1; Carbamidomethyl(C)@10; Carbamidomethyl(C)@14	missed K-C@9	2	P08603, Q03591
sp|P08603|CFAH_HUMAN	NGQWSEPPKCLHPCVISR	Deamidated(N)@1; Carbamidomethyl(C)@10; Carbamidomethyl(C)@14	missed K-C@9	2	P08603, Q03591
sp|P08603|CFAH_HUMAN	NGQWSEPPKCLHPCVISR	Deamidated(N)@1; Carbamidomethyl(C)@10; Carbamidomethyl(C)@14	missed K-C@9	2	P08603, Q03591
sp|P08603|CFAH_HUMAN	NGQWSEPPKCLHPCVISR	Carbamidomethyl(C)@10; Carbamidomethyl(C)@14	missed K-C@9	2	P08603, Q03591
sp|P08603|CFAH_HUMAN	NGQWSEPPKCLHPCVISR	Carbamidomethyl(C)@10; Carbamidomethyl(C)@14	missed K-C@9	2	P08603, Q03591
sp|P08603|CFAH_HUMAN	NGQWSEPPKCLHPCVISR	Carbamidomethyl(C)@10; Carbamidomethyl(C)@14	missed K-C@9	2	P08603, Q03591
sp|P08603|CFAH_HUMAN	NGQWSEPPKCLHPCVISR	Carbamidomethyl(C)@10; Carbamidomethyl(C)@14	missed K-C@9	2	P08603, Q03591
sp|P08603|CFAH_HUMAN	NGQWSEPPKCLHPCVISR	Carbamidomethyl(C)@10; Carbamidomethyl(C)@14	missed K-C@9	2	P08603, Q03591
sp|P08603|CFAH_HUMAN	NGQWSEPPKCLHPCVISR	Carbamidomethyl(C)@10; Carbamidomethyl(C)@14	missed K-C@9	2	P08603, Q03591
sp|P08603|CFAH_HUMAN	NGQWSEPPKCLHPCVISR	Carbamidomethyl(C)@10; Carbamidomethyl(C)@14	missed K-C@9	2	P08603, Q03591
sp|P08603|CFAH_HUMAN	NGQWSEPPKCLHPCVISR	Deamidated(N)@1; Carbamidomethyl(C)@10; Carbamidomethyl(C)@14	missed K-C@9	2	P08603, Q03591
sp|P08603|CFAH_HUMAN	NGQWSEPPKCLHPCVISR	Carbamidomethyl(C)@10; Carbamidomethyl(C)@14	missed K-C@9	2	P08603, Q03591
sp|P08603|CFAH_HUMAN	NGQWSEPPKCLHPCVISR	Carbamidomethyl(C)@10; Carbamidomethyl(C)@14	missed K-C@9	2	P08603, Q03591
sp|P08603|CFAH_HUMAN	NGQWSEPPKCLHPCVISR	Carbamidomethyl(C)@10; Carbamidomethyl(C)@14	missed K-C@9	2	P08603, Q03591
sp|P08603|CFAH_HUMAN	NGQWSEPPKCLHPCVISR	Deamidated(N)@1; Carbamidomethyl(C)@10; Carbamidomethyl(C)@14	missed K-C@9	2	P08603, Q03591
sp|P08603|CFAH_HUMAN	NGQWSEPPKCLHPCVISR	Carbamidomethyl(C)@10; Carbamidomethyl(C)@14	missed K-C@9	2	P08603, Q03591
sp|P08603|CFAH_HUMAN	NGQWSEPPKCLHPCVISR	Deamidated(N)@1; Deamidated(Q)@3; Carbamidomethyl(C)@10; Carbamidomethyl(C)@14	missed K-C@9	2	P08603, Q03591
sp|P08603|CFAH_HUMAN	NGQWSEPPKCLHPCVISR	Deamidated(N)@1; Carbamidomethyl(C)@10; Carbamidomethyl(C)@14	missed K-C@9	2	P08603, Q03591
sp|P08603|CFAH_HUMAN	NGQWSEPPKCLHPCVISR	Deamidated(N)@1; Carbamidomethyl(C)@10; Carbamidomethyl(C)@14	missed K-C@9	2	P08603, Q03591
sp|P08603|CFAH_HUMAN	NGQWSEPPKCLHPCVISR	Carbamidomethyl(C)@10; Carbamidomethyl(C)@14	missed K-C@9	2	P08603, Q03591
sp|P08603|CFAH_HUMAN	NGQWSEPPKCLHPCVISR	Deamidated(N)@1; Deamidated(Q)@3; Carbamidomethyl(C)@10; Carbamidomethyl(C)@14	missed K-C@9	2	P08603, Q03591
sp|P08603|CFAH_HUMAN	NGQWSEPPKCLHPCVISR	Deamidated(Q)@3; Carbamidomethyl(C)@10; Carbamidomethyl(C)@14	missed K-C@9	2	P08603, Q03591
sp|P08603|CFAH_HUMAN	NGQWSEPPKCLHPCVISR	Deamidated(N)@1; Carbamidomethyl(C)@10; Carbamidomethyl(C)@14	missed K-C@9	2	P08603, Q03591
sp|P08603|CFAH_HUMAN	NGQWSEPPKCLHPCVISR	Carbamidomethyl(C)@10; Carbamidomethyl(C)@14	missed K-C@9	2	P08603, Q03591
sp|P08603|CFAH_HUMAN	NSVQCYHFGLSPDLPICK	Carbamidomethyl(C)@5; Carbamidomethyl(C)@17	cleaved P-N@N-term	1	P08603
sp|P08603|CFAH_HUMAN	NSVQCYHFGLSPDLPICK	Carbamidomethyl(C)@5; Carbamidomethyl(C)@17	cleaved P-N@N-term	1	P08603
sp|P08603|CFAH_HUMAN	NTEILTGSWSDQTYPEGTQAIYK			1	P08603
sp|P08603|CFAH_HUMAN	NTEILTGSWSDQTYPEGTQAIYK			1	P08603
sp|P08603|CFAH_HUMAN	NTEILTGSWSDQTYPEGTQAIYK			1	P08603
sp|P08603|CFAH_HUMAN	NTEILTGSWSDQTYPEGTQAIYK			1	P08603
sp|P08603|CFAH_HUMAN	NTEILTGSWSDQTYPEGTQAIYK	Carbamidomethyl@N-term; Dehydrated(T)@6; Oxidation(W)@9; Deamidated(Q)@12		1	P08603
sp|P08603|CFAH_HUMAN	NTEILTGSWSDQTYPEGTQAIYK			1	P08603
sp|P08603|CFAH_HUMAN	NTEILTGSWSDQTYPEGTQAIYK			1	P08603
sp|P08603|CFAH_HUMAN	NTEILTGSWSDQTYPEGTQAIYK			1	P08603
sp|P08603|CFAH_HUMAN	NTEILTGSWSDQTYPEGTQAIYK			1	P08603
sp|P08603|CFAH_HUMAN	NTEILTGSWSDQTYPEGTQAIYK			1	P08603
sp|P08603|CFAH_HUMAN	NTEILTGSWSDQTYPEGTQAIYK			1	P08603
sp|P08603|CFAH_HUMAN	NTEILTGSWSDQTYPEGTQAIYK			1	P08603
sp|P08603|CFAH_HUMAN	NTEILTGSWSDQTYPEGTQAIYK			1	P08603
sp|P08603|CFAH_HUMAN	NTEILTGSWSDQTYPEGTQAIYK			1	P08603
sp|P08603|CFAH_HUMAN	NTEILTGSWSDQTYPEGTQAIYK			1	P08603
sp|P08603|CFAH_HUMAN	NTEILTGSWSDQTYPEGTQAIYK			1	P08603
sp|P08603|CFAH_HUMAN	NTEILTGSWSDQTYPEGTQAIYK			1	P08603
sp|P08603|CFAH_HUMAN	NTEILTGSWSDQTYPEGTQAIYK			1	P08603
sp|P08603|CFAH_HUMAN	NTEILTGSWSDQTYPEGTQAIYK	Cation:K(D)@11		1	P08603
sp|P08603|CFAH_HUMAN	NTEILTGSWSDQTYPEGTQAIYK	Deamidated(Q)@12; Oxidation(Y)@14		1	P08603
sp|P08603|CFAH_HUMAN	NTEILTGSWSDQTYPEGTQAIYK	Cation:K(D)@11		1	P08603
sp|P08603|CFAH_HUMAN	NTEILTGSWSDQTYPEGTQAIYK			1	P08603
sp|P08603|CFAH_HUMAN	NTEILTGSWSDQTYPEGTQAIYK			1	P08603
sp|P08603|CFAH_HUMAN	NTEILTGSWSDQTYPEGTQAIYK			1	P08603
sp|P08603|CFAH_HUMAN	NTEILTGSWSDQTYPEGTQAIYK			1	P08603
sp|P08603|CFAH_HUMAN	NTEILTGSWSDQTYPEGTQAIYK			1	P08603
sp|P08603|CFAH_HUMAN	NTEILTGSWSDQTYPEGTQAIYK	Oxidation(W)@9; Deamidated(Q)@12		1	P08603
sp|P08603|CFAH_HUMAN	NTEILTGSWSDQTYPEGTQAIYK	Oxidation(W)@9; Cation:K(D)@11		1	P08603
sp|P08603|CFAH_HUMAN	NTEILTGSWSDQTYPEGTQAIYK			1	P08603
sp|P08603|CFAH_HUMAN	NTEILTGSWSDQTYPEGTQAIYK			1	P08603
sp|P08603|CFAH_HUMAN	NTEILTGSWSDQTYPEGTQAIYK	Deamidated(N)@1		1	P08603
sp|P08603|CFAH_HUMAN	NTEILTGSWSDQTYPEGTQAIYK	Deamidated(Q)@12; Deamidated(Q)@19		1	P08603
sp|P08603|CFAH_HUMAN	NTEILTGSWSDQTYPEGTQAIYK			1	P08603
sp|P08603|CFAH_HUMAN	NTEILTGSWSDQTYPEGTQAIYK	Deamidated(Q)@12		1	P08603
sp|P08603|CFAH_HUMAN	NTEILTGSWSDQTYPEGTQAIYK	Deamidated(N)@1		1	P08603
sp|P08603|CFAH_HUMAN	NTEILTGSWSDQTYPEGTQAIYK	Cation:K(D)@11		1	P08603
sp|P08603|CFAH_HUMAN	NTEILTGSWSDQTYPEGTQAIYK	Cation:Na(E)@3		1	P08603
sp|P08603|CFAH_HUMAN	NTEILTGSWSDQTYPEGTQAIYK			1	P08603
sp|P08603|CFAH_HUMAN	NTEILTGSWSDQTYPEGTQAIYK			1	P08603
sp|P08603|CFAH_HUMAN	NTEILTGSWSDQTYPEGTQAIYK	Cation:K(D)@11		1	P08603
sp|P08603|CFAH_HUMAN	NTEILTGSWSDQTYPEGTQAIYK	Trp->Kynurenin(W)@9		1	P08603
sp|P08603|CFAH_HUMAN	QMSKYPSGER	Gln->pyro-Glu@N-term; Oxidation(M)@2	missed K-Y@4	2	P08603, Q03591
sp|P08603|CFAH_HUMAN	QMSKYPSGER	Gln->pyro-Glu@N-term	missed K-Y@4	2	P08603, Q03591
sp|P08603|CFAH_HUMAN	QMSKYPSGER	Gln->pyro-Glu@N-term	missed K-Y@4	2	P08603, Q03591
sp|P08603|CFAH_HUMAN	QMSKYPSGER	Gln->pyro-Glu@N-term	missed K-Y@4	2	P08603, Q03591
sp|P08603|CFAH_HUMAN	QMSKYPSGER	Gln->pyro-Glu@N-term; Oxidation(M)@2	missed K-Y@4	2	P08603, Q03591
sp|P08603|CFAH_HUMAN	QMSKYPSGER	Gln->pyro-Glu@N-term	missed K-Y@4	2	P08603, Q03591
sp|P08603|CFAH_HUMAN	QMSKYPSGER	Gln->pyro-Glu@N-term; Oxidation(M)@2	missed K-Y@4	2	P08603, Q03591
sp|P08603|CFAH_HUMAN	QMSKYPSGER	Gln->pyro-Glu@N-term	missed K-Y@4	2	P08603, Q03591
sp|P08603|CFAH_HUMAN	QMSKYPSGER	Gln->pyro-Glu@N-term	missed K-Y@4	2	P08603, Q03591
sp|P08603|CFAH_HUMAN	RDTSCVNPPTVQNAYIVSR	Dioxidation(R)@1; Carbamidomethyl(C)@5	cleaved C-R@N-term; missed R-D@1	1	P08603
sp|P08603|CFAH_HUMAN	RDTSCVNPPTVQNAYIVSR	Dioxidation(R)@1; Carbamidomethyl(C)@5; Deamidated(N)@7	cleaved C-R@N-term; missed R-D@1	1	P08603
sp|P08603|CFAH_HUMAN	RDTSCVNPPTVQNAYIVSR	Dioxidation(R)@1; Carbamidomethyl(C)@5	cleaved C-R@N-term; missed R-D@1	1	P08603
sp|P08603|CFAH_HUMAN	RDTSCVNPPTVQNAYIVSR	Dioxidation(R)@1; Carbamidomethyl(C)@5	cleaved C-R@N-term; missed R-D@1	1	P08603
sp|P08603|CFAH_HUMAN	RNTEILTGSWSDQTYPEGTQAIYK		missed R-N@1	1	P08603
sp|P08603|CFAH_HUMAN	RNTEILTGSWSDQTYPEGTQAIYK		missed R-N@1	1	P08603
sp|P08603|CFAH_HUMAN	RNTEILTGSWSDQTYPEGTQAIYK		missed R-N@1	1	P08603
sp|P08603|CFAH_HUMAN	RNTEILTGSWSDQTYPEGTQAIYK	Deamidated(Q)@20	missed R-N@1	1	P08603
sp|P08603|CFAH_HUMAN	RNTEILTGSWSDQTYPEGTQAIYK		missed R-N@1	1	P08603
sp|P08603|CFAH_HUMAN	RNTEILTGSWSDQTYPEGTQAIYK	Deamidated(Q)@13	missed R-N@1	1	P08603
sp|P08603|CFAH_HUMAN	RNTEILTGSWSDQTYPEGTQAIYK	Deamidated(Q)@13	missed R-N@1	1	P08603
sp|P08603|CFAH_HUMAN	RNTEILTGSWSDQTYPEGTQAIYK	Deamidated(Q)@13	missed R-N@1	1	P08603
sp|P08603|CFAH_HUMAN	RNTEILTGSWSDQTYPEGTQAIYK		missed R-N@1	1	P08603
sp|P08603|CFAH_HUMAN	RNTEILTGSWSDQTYPEGTQAIYK		missed R-N@1	1	P08603
sp|P08603|CFAH_HUMAN	RPCGHPGDTPFGTFTLTGGNVFEYGVK	Carbamidomethyl(C)@3		1	P08603
sp|P08603|CFAH_HUMAN	RPCGHPGDTPFGTFTLTGGNVFEYGVK	Carbamidomethyl(C)@3		1	P08603
sp|P08603|CFAH_HUMAN	RPCGHPGDTPFGTFTLTGGNVFEYGVK	Carbamidomethyl(C)@3		1	P08603
sp|P08603|CFAH_HUMAN	RPYFPVAVGK			2	P08603, Q02985
sp|P08603|CFAH_HUMAN	RPYFPVAVGK			2	P08603, Q02985
sp|P08603|CFAH_HUMAN	RPYFPVAVGK			2	P08603, Q02985
sp|P08603|CFAH_HUMAN	RPYFPVAVGK			2	P08603, Q02985
sp|P08603|CFAH_HUMAN	RPYFPVAVGK			2	P08603, Q02985
sp|P08603|CFAH_HUMAN	RPYFPVAVGK			2	P08603, Q02985
sp|P08603|CFAH_HUMAN	RPYFPVAVGK			2	P08603, Q02985
sp|P08603|CFAH_HUMAN	RPYFPVAVGK			2	P08603, Q02985
sp|P08603|CFAH_HUMAN	RPYFPVAVGK			2	P08603, Q02985
sp|P08603|CFAH_HUMAN	RPYFPVAVGK			2	P08603, Q02985
sp|P08603|CFAH_HUMAN	RPYFPVAVGK			2	P08603, Q02985
sp|P08603|CFAH_HUMAN	RPYFPVAVGK			2	P08603, Q02985
sp|P08603|CFAH_HUMAN	RPYFPVAVGK			2	P08603, Q02985
sp|P08603|CFAH_HUMAN	RPYFPVAVGK			2	P08603, Q02985
sp|P08603|CFAH_HUMAN	RPYFPVAVGK			2	P08603, Q02985
sp|P08603|CFAH_HUMAN	RPYFPVAVGK			2	P08603, Q02985
sp|P08603|CFAH_HUMAN	RPYFPVAVGK			2	P08603, Q02985
sp|P08603|CFAH_HUMAN	RPYFPVAVGK			2	P08603, Q02985
sp|P08603|CFAH_HUMAN	RPYFPVAVGK			2	P08603, Q02985
sp|P08603|CFAH_HUMAN	RPYFPVAVGK			2	P08603, Q02985
sp|P08603|CFAH_HUMAN	RPYFPVAVGK			2	P08603, Q02985
sp|P08603|CFAH_HUMAN	RPYFPVAVGK			2	P08603, Q02985
sp|P08603|CFAH_HUMAN	RPYFPVAVGK			2	P08603, Q02985
sp|P08603|CFAH_HUMAN	RPYFPVAVGK			2	P08603, Q02985
sp|P08603|CFAH_HUMAN	RPYFPVAVGK			2	P08603, Q02985
sp|P08603|CFAH_HUMAN	RPYFPVAVGK			2	P08603, Q02985
sp|P08603|CFAH_HUMAN	RPYFPVAVGK			2	P08603, Q02985
sp|P08603|CFAH_HUMAN	RPYFPVAVGK			2	P08603, Q02985
sp|P08603|CFAH_HUMAN	RPYFPVAVGK			2	P08603, Q02985
sp|P08603|CFAH_HUMAN	RPYFPVAVGK			2	P08603, Q02985
sp|P08603|CFAH_HUMAN	RPYFPVAVGK			2	P08603, Q02985
sp|P08603|CFAH_HUMAN	RPYFPVAVGK			2	P08603, Q02985
sp|P08603|CFAH_HUMAN	RPYFPVAVGK			2	P08603, Q02985
sp|P08603|CFAH_HUMAN	RPYFPVAVGK			2	P08603, Q02985
sp|P08603|CFAH_HUMAN	RPYFPVAVGK			2	P08603, Q02985
sp|P08603|CFAH_HUMAN	RPYFPVAVGK			2	P08603, Q02985
sp|P08603|CFAH_HUMAN	RPYFPVAVGK			2	P08603, Q02985
sp|P08603|CFAH_HUMAN	SCDIPVFMNAR	Carbamidomethyl(C)@2		1	P08603
sp|P08603|CFAH_HUMAN	SCDIPVFMNAR	Carbamidomethyl(C)@2		1	P08603
sp|P08603|CFAH_HUMAN	SCDIPVFMNAR	Carbamidomethyl(C)@2		1	P08603
sp|P08603|CFAH_HUMAN	SCDIPVFMNAR	Carbamidomethyl(C)@2		1	P08603
sp|P08603|CFAH_HUMAN	SCDIPVFMNAR	Carbamidomethyl(C)@2		1	P08603
sp|P08603|CFAH_HUMAN	SCDIPVFMNAR	Carbamidomethyl(C)@2		1	P08603
sp|P08603|CFAH_HUMAN	SCDIPVFMNAR	Carbamidomethyl(C)@2		1	P08603
sp|P08603|CFAH_HUMAN	SCDIPVFMNAR	Carbamidomethyl(C)@2		1	P08603
sp|P08603|CFAH_HUMAN	SCDIPVFMNAR	Carbamidomethyl(C)@2		1	P08603
sp|P08603|CFAH_HUMAN	SCDIPVFMNAR	Carbamidomethyl(C)@2; Deamidated(N)@9		1	P08603
sp|P08603|CFAH_HUMAN	SCDIPVFMNAR	Carbamidomethyl(C)@2		1	P08603
sp|P08603|CFAH_HUMAN	SCDIPVFMNAR	Carbamidomethyl(C)@2		1	P08603
sp|P08603|CFAH_HUMAN	SCDIPVFMNAR	Carbamidomethyl(C)@2		1	P08603
sp|P08603|CFAH_HUMAN	SCDIPVFMNAR	Carbamidomethyl(C)@2; Deamidated(N)@9		1	P08603
sp|P08603|CFAH_HUMAN	SCDIPVFMNAR	Carbamidomethyl(C)@2		1	P08603
sp|P08603|CFAH_HUMAN	SCDIPVFMNAR	Carbamidomethyl(C)@2		1	P08603
sp|P08603|CFAH_HUMAN	SCDIPVFMNAR	Carbamidomethyl(C)@2		1	P08603
sp|P08603|CFAH_HUMAN	SCDIPVFMNAR	Carbamidomethyl(C)@2		1	P08603
sp|P08603|CFAH_HUMAN	SCDIPVFMNAR	Carbamidomethyl(C)@2		1	P08603
sp|P08603|CFAH_HUMAN	SCDIPVFMNAR	Carbamidomethyl(C)@2		1	P08603
sp|P08603|CFAH_HUMAN	SCDIPVFMNAR	Carbamidomethyl(C)@2		1	P08603
sp|P08603|CFAH_HUMAN	SCDIPVFMNAR	Carbamidomethyl(C)@2		1	P08603
sp|P08603|CFAH_HUMAN	SCDIPVFMNAR	Carbamidomethyl(C)@2		1	P08603
sp|P08603|CFAH_HUMAN	SCDIPVFMNAR	Carbamidomethyl(C)@2		1	P08603
sp|P08603|CFAH_HUMAN	SCDIPVFMNAR	Carbamidomethyl(C)@2		1	P08603
sp|P08603|CFAH_HUMAN	SCDIPVFMNAR	Carbamidomethyl(C)@2		1	P08603
sp|P08603|CFAH_HUMAN	SCDIPVFMNAR	Carbamidomethyl(C)@2		1	P08603
sp|P08603|CFAH_HUMAN	SCDIPVFMNAR	Carbamidomethyl(C)@2		1	P08603
sp|P08603|CFAH_HUMAN	SCDIPVFMNAR	Carbamidomethyl(C)@2		1	P08603
sp|P08603|CFAH_HUMAN	SCDIPVFMNAR	Carbamidomethyl(C)@2		1	P08603
sp|P08603|CFAH_HUMAN	SCDIPVFMNAR	Carbamidomethyl(C)@2; Deamidated(N)@9		1	P08603
sp|P08603|CFAH_HUMAN	SCDIPVFMNAR	Carbamidomethyl(C)@2		1	P08603
sp|P08603|CFAH_HUMAN	SCDIPVFMNAR	Carbamidomethyl(C)@2		1	P08603
sp|P08603|CFAH_HUMAN	SCDIPVFMNAR	Carbamidomethyl(C)@2		1	P08603
sp|P08603|CFAH_HUMAN	SCDIPVFMNAR	Carbamidomethyl(C)@2		1	P08603
sp|P08603|CFAH_HUMAN	SCDIPVFMNAR	Carbamidomethyl(C)@2		1	P08603
sp|P08603|CFAH_HUMAN	SCDIPVFMNAR	Carbamidomethyl(C)@2		1	P08603
sp|P08603|CFAH_HUMAN	SCDIPVFMNAR	Carbamidomethyl(C)@2		1	P08603
sp|P08603|CFAH_HUMAN	SCDIPVFMNAR	Carbamidomethyl(C)@2		1	P08603
sp|P08603|CFAH_HUMAN	SCDIPVFMNAR	Carbamidomethyl(C)@2		1	P08603
sp|P08603|CFAH_HUMAN	SCDIPVFMNAR	Carbamidomethyl(C)@2		1	P08603
sp|P08603|CFAH_HUMAN	SCDIPVFMNAR	Carbamidomethyl(C)@2		1	P08603
sp|P08603|CFAH_HUMAN	SCDIPVFMNAR	Carbamidomethyl(C)@2		1	P08603
sp|P08603|CFAH_HUMAN	SCDIPVFMNAR	Carbamidomethyl(C)@2		1	P08603
sp|P08603|CFAH_HUMAN	SCDIPVFMNAR	Carbamidomethyl(C)@2		1	P08603
sp|P08603|CFAH_HUMAN	SCDIPVFMNAR	Carbamidomethyl(C)@2		1	P08603
sp|P08603|CFAH_HUMAN	SCDIPVFMNAR	Carbamidomethyl(C)@2		1	P08603
sp|P08603|CFAH_HUMAN	SCDIPVFMNAR	Carbamidomethyl(C)@2		1	P08603
sp|P08603|CFAH_HUMAN	SCDIPVFMNAR	Carbamidomethyl(C)@2		1	P08603
sp|P08603|CFAH_HUMAN	SCDIPVFMNAR	Carbamidomethyl(C)@2		1	P08603
sp|P08603|CFAH_HUMAN	SCDIPVFMNAR	Carbamidomethyl(C)@2		1	P08603
sp|P08603|CFAH_HUMAN	SCDIPVFMNAR	Carbamidomethyl(C)@2		1	P08603
sp|P08603|CFAH_HUMAN	SCDIPVFMNAR	Carbamidomethyl(C)@2		1	P08603
sp|P08603|CFAH_HUMAN	SCDIPVFMNAR	Carbamidomethyl(C)@2		1	P08603
sp|P08603|CFAH_HUMAN	SCDIPVFMNAR	Carbamidomethyl(C)@2		1	P08603
sp|P08603|CFAH_HUMAN	SCDIPVFMNAR	Carbamidomethyl(C)@2		1	P08603
sp|P08603|CFAH_HUMAN	SCDIPVFMNAR	Carbamidomethyl(C)@2		1	P08603
sp|P08603|CFAH_HUMAN	SCDIPVFMNAR	Carbamidomethyl@N-term; Carbamidomethyl(C)@2		1	P08603
sp|P08603|CFAH_HUMAN	SCDIPVFMNAR	Carbamidomethyl(C)@2		1	P08603
sp|P08603|CFAH_HUMAN	SCDIPVFMNAR	Carbamidomethyl(C)@2		1	P08603
sp|P08603|CFAH_HUMAN	SCDIPVFMNAR	Carbamidomethyl(C)@2		1	P08603
sp|P08603|CFAH_HUMAN	SCDIPVFMNAR	Carbamidomethyl(C)@2; Deamidated(N)@9		1	P08603
sp|P08603|CFAH_HUMAN	SCDIPVFMNAR	Carbamidomethyl(C)@2		1	P08603
sp|P08603|CFAH_HUMAN	SCDIPVFMNAR	Carbamidomethyl(C)@2		1	P08603
sp|P08603|CFAH_HUMAN	SCDIPVFMNAR	Carbamidomethyl(C)@2; Oxidation(M)@8		1	P08603
sp|P08603|CFAH_HUMAN	SCDIPVFMNAR	Carbamidomethyl(C)@2		1	P08603
sp|P08603|CFAH_HUMAN	SCDIPVFMNAR	Carbamidomethyl(C)@2		1	P08603
sp|P08603|CFAH_HUMAN	SCDIPVFMNAR	Carbamidomethyl(C)@2; Oxidation(M)@8		1	P08603
sp|P08603|CFAH_HUMAN	SCDIPVFMNAR	Carbamidomethyl(C)@2; Deamidated(N)@9		1	P08603
sp|P08603|CFAH_HUMAN	SCDIPVFMNAR	Carbamidomethyl(C)@2; Oxidation(M)@8		1	P08603
sp|P08603|CFAH_HUMAN	SCDIPVFMNAR	Carbamidomethyl(C)@2		1	P08603
sp|P08603|CFAH_HUMAN	SCDIPVFMNAR	Carbamidomethyl(C)@2		1	P08603
sp|P08603|CFAH_HUMAN	SCDIPVFMNAR	Carbamidomethyl(C)@2		1	P08603
sp|P08603|CFAH_HUMAN	SCDIPVFMNAR	Carbamidomethyl(C)@2		1	P08603
sp|P08603|CFAH_HUMAN	SCDIPVFMNAR	Carbamidomethyl(C)@2		1	P08603
sp|P08603|CFAH_HUMAN	SCDIPVFMNAR	Carbamidomethyl(C)@2		1	P08603
sp|P08603|CFAH_HUMAN	SCDIPVFMNAR	Carbamidomethyl(C)@2		1	P08603
sp|P08603|CFAH_HUMAN	SCDIPVFMNAR	Carbamidomethyl(C)@2; Deamidated(N)@9		1	P08603
sp|P08603|CFAH_HUMAN	SCDIPVFMNAR	Carbamidomethyl(C)@2; Deamidated(N)@9		1	P08603
sp|P08603|CFAH_HUMAN	SCDIPVFMNAR	Carbamidomethyl(C)@2; Oxidation(M)@8		1	P08603
sp|P08603|CFAH_HUMAN	SCDIPVFMNAR	Carbamidomethyl(C)@2; Oxidation(M)@8		1	P08603
sp|P08603|CFAH_HUMAN	SCDIPVFMNAR	Carbamidomethyl(C)@2		1	P08603
sp|P08603|CFAH_HUMAN	SCDIPVFMNAR	Carbamidomethyl(C)@2; Oxidation(M)@8		1	P08603
sp|P08603|CFAH_HUMAN	SCDIPVFMNAR	Carbamidomethyl(C)@2		1	P08603
sp|P08603|CFAH_HUMAN	SCDIPVFMNAR	Carbamidomethyl(C)@2		1	P08603
sp|P08603|CFAH_HUMAN	SCDIPVFMNAR	Carbamidomethyl(C)@2		1	P08603
sp|P08603|CFAH_HUMAN	SCDIPVFMNAR	Carbamidomethyl(C)@2; Oxidation(M)@8		1	P08603
sp|P08603|CFAH_HUMAN	SCDIPVFMNAR	Carbamidomethyl(C)@2		1	P08603
sp|P08603|CFAH_HUMAN	SCDIPVFMNAR	Carbamidomethyl(C)@2		1	P08603
sp|P08603|CFAH_HUMAN	SCDIPVFMNAR	Carbamidomethyl(C)@2; Oxidation(M)@8		1	P08603
sp|P08603|CFAH_HUMAN	SCDIPVFMNAR	Carbamidomethyl(C)@2		1	P08603
sp|P08603|CFAH_HUMAN	SCDIPVFMNAR	Carbamidomethyl(C)@2		1	P08603
sp|P08603|CFAH_HUMAN	SCDIPVFMNAR	Carbamidomethyl(C)@2		1	P08603
sp|P08603|CFAH_HUMAN	SCDIPVFMNAR	Carbamidomethyl(C)@2		1	P08603
sp|P08603|CFAH_HUMAN	SCDIPVFMNAR	Carbamidomethyl(C)@2		1	P08603
sp|P08603|CFAH_HUMAN	SCDIPVFMNAR	Carbamidomethyl(C)@2; Oxidation(M)@8		1	P08603
sp|P08603|CFAH_HUMAN	SCDIPVFMNAR	Carbamidomethyl(C)@2; Deamidated(N)@9		1	P08603
sp|P08603|CFAH_HUMAN	SCDIPVFMNAR	Carbamidomethyl(C)@2		1	P08603
sp|P08603|CFAH_HUMAN	SCDIPVFMNAR	Carbamidomethyl(C)@2		1	P08603
sp|P08603|CFAH_HUMAN	SCDNPYIPNGDYSPLR	Carbamidomethyl(C)@2		1	P08603
sp|P08603|CFAH_HUMAN	SCDNPYIPNGDYSPLR	Carbamidomethyl(C)@2		1	P08603
sp|P08603|CFAH_HUMAN	SCDNPYIPNGDYSPLR	Carbamidomethyl(C)@2; Deamidated(N)@4; Deamidated(N)@9		1	P08603
sp|P08603|CFAH_HUMAN	SCDNPYIPNGDYSPLR	Carbamidomethyl(C)@2; Deamidated(N)@9		1	P08603
sp|P08603|CFAH_HUMAN	SCDNPYIPNGDYSPLR	Carbamidomethyl(C)@2		1	P08603
sp|P08603|CFAH_HUMAN	SCDNPYIPNGDYSPLR	Carbamidomethyl(C)@2; Deamidated(N)@9		1	P08603
sp|P08603|CFAH_HUMAN	SCDNPYIPNGDYSPLR	Carbamidomethyl(C)@2; Deamidated(N)@9		1	P08603
sp|P08603|CFAH_HUMAN	SCDNPYIPNGDYSPLR	Carbamidomethyl(C)@2		1	P08603
sp|P08603|CFAH_HUMAN	SCDNPYIPNGDYSPLR	Carbamidomethyl(C)@2		1	P08603
sp|P08603|CFAH_HUMAN	SCDNPYIPNGDYSPLR	Carbamidomethyl(C)@2; Deamidated(N)@9		1	P08603
sp|P08603|CFAH_HUMAN	SCDNPYIPNGDYSPLR	Carbamidomethyl(C)@2; Deamidated(N)@9		1	P08603
sp|P08603|CFAH_HUMAN	SCDNPYIPNGDYSPLR	Carbamidomethyl(C)@2; Deamidated(N)@4; Deamidated(N)@9		1	P08603
sp|P08603|CFAH_HUMAN	SCDNPYIPNGDYSPLR	Carbamidomethyl(C)@2		1	P08603
sp|P08603|CFAH_HUMAN	SCDNPYIPNGDYSPLR	Carbamidomethyl(C)@2; Deamidated(N)@9		1	P08603
sp|P08603|CFAH_HUMAN	SCDNPYIPNGDYSPLR	Carbamidomethyl(C)@2; Deamidated(N)@9		1	P08603
sp|P08603|CFAH_HUMAN	SCDNPYIPNGDYSPLR	Carbamidomethyl(C)@2; Deamidated(N)@9		1	P08603
sp|P08603|CFAH_HUMAN	SCDNPYIPNGDYSPLR	Carbamidomethyl(C)@2; Deamidated(N)@9		1	P08603
sp|P08603|CFAH_HUMAN	SCDNPYIPNGDYSPLR	Carbamidomethyl(C)@2; Deamidated(N)@9		1	P08603
sp|P08603|CFAH_HUMAN	SCDNPYIPNGDYSPLR	Carbamidomethyl(C)@2; Deamidated(N)@9		1	P08603
sp|P08603|CFAH_HUMAN	SCDNPYIPNGDYSPLR	Carbamidomethyl(C)@2; Deamidated(N)@9		1	P08603
sp|P08603|CFAH_HUMAN	SCDNPYIPNGDYSPLR	Carbamidomethyl(C)@2; Deamidated(N)@9		1	P08603
sp|P08603|CFAH_HUMAN	SCDNPYIPNGDYSPLR	Carbamidomethyl(C)@2		1	P08603
sp|P08603|CFAH_HUMAN	SCDNPYIPNGDYSPLR	Carbamidomethyl(C)@2; Deamidated(N)@9		1	P08603
sp|P08603|CFAH_HUMAN	SCDNPYIPNGDYSPLR	Carbamidomethyl(C)@2		1	P08603
sp|P08603|CFAH_HUMAN	SCDNPYIPNGDYSPLR	Carbamidomethyl(C)@2; Deamidated(N)@9		1	P08603
sp|P08603|CFAH_HUMAN	SCDNPYIPNGDYSPLR	Carbamidomethyl(C)@2; Deamidated(N)@9		1	P08603
sp|P08603|CFAH_HUMAN	SCDNPYIPNGDYSPLR	Carbamidomethyl(C)@2; Deamidated(N)@9		1	P08603
sp|P08603|CFAH_HUMAN	SCDNPYIPNGDYSPLR	Carbamidomethyl(C)@2		1	P08603
sp|P08603|CFAH_HUMAN	SCDNPYIPNGDYSPLR	Carbamidomethyl(C)@2		1	P08603
sp|P08603|CFAH_HUMAN	SCDNPYIPNGDYSPLR	Carbamidomethyl(C)@2		1	P08603
sp|P08603|CFAH_HUMAN	SCDNPYIPNGDYSPLR	Carbamidomethyl(C)@2; Deamidated(N)@9		1	P08603
sp|P08603|CFAH_HUMAN	SCDNPYIPNGDYSPLR	Carbamidomethyl(C)@2; Deamidated(N)@9		1	P08603
sp|P08603|CFAH_HUMAN	SCDNPYIPNGDYSPLR	Carbamidomethyl(C)@2		1	P08603
sp|P08603|CFAH_HUMAN	SCDNPYIPNGDYSPLR	Carbamidomethyl(C)@2		1	P08603
sp|P08603|CFAH_HUMAN	SCDNPYIPNGDYSPLR	Carbamidomethyl(C)@2; Deamidated(N)@9		1	P08603
sp|P08603|CFAH_HUMAN	SCDNPYIPNGDYSPLR	Carbamidomethyl(C)@2		1	P08603
sp|P08603|CFAH_HUMAN	SCDNPYIPNGDYSPLR	Carbamidomethyl(C)@2		1	P08603
sp|P08603|CFAH_HUMAN	SCDNPYIPNGDYSPLR	Carbamidomethyl(C)@2		1	P08603
sp|P08603|CFAH_HUMAN	SCDNPYIPNGDYSPLR	Carbamidomethyl(C)@2		1	P08603
sp|P08603|CFAH_HUMAN	SIDVACHPGYALPK	Carbamidomethyl(C)@6		1	P08603
sp|P08603|CFAH_HUMAN	SIDVACHPGYALPK	Carbamidomethyl(C)@6		1	P08603
sp|P08603|CFAH_HUMAN	SIDVACHPGYALPK	Carbamidomethyl(C)@6		1	P08603
sp|P08603|CFAH_HUMAN	SIDVACHPGYALPK	Carbamidomethyl(C)@6		1	P08603
sp|P08603|CFAH_HUMAN	SIDVACHPGYALPK	Carbamidomethyl(C)@6		1	P08603
sp|P08603|CFAH_HUMAN	SIDVACHPGYALPK	Carbamidomethyl(C)@6		1	P08603
sp|P08603|CFAH_HUMAN	SIDVACHPGYALPK	Carbamidomethyl(C)@6		1	P08603
sp|P08603|CFAH_HUMAN	SIDVACHPGYALPK	Carbamidomethyl(C)@6		1	P08603
sp|P08603|CFAH_HUMAN	SIDVACHPGYALPK	Carbamidomethyl(C)@6		1	P08603
sp|P08603|CFAH_HUMAN	SIDVACHPGYALPK	Carbamidomethyl(C)@6		1	P08603
sp|P08603|CFAH_HUMAN	SIDVACHPGYALPK	Carbamidomethyl(C)@6		1	P08603
sp|P08603|CFAH_HUMAN	SIDVACHPGYALPK	Carbamidomethyl(C)@6		1	P08603
sp|P08603|CFAH_HUMAN	SIDVACHPGYALPK	Carbamidomethyl(C)@6		1	P08603
sp|P08603|CFAH_HUMAN	SIDVACHPGYALPK	Carbamidomethyl(C)@6		1	P08603
sp|P08603|CFAH_HUMAN	SIDVACHPGYALPK	Carbamidomethyl(C)@6		1	P08603
sp|P08603|CFAH_HUMAN	SIDVACHPGYALPK	Carbamidomethyl@N-term; Carbamidomethyl(C)@6		1	P08603
sp|P08603|CFAH_HUMAN	SIDVACHPGYALPK	Carbamidomethyl(C)@6		1	P08603
sp|P08603|CFAH_HUMAN	SIDVACHPGYALPK	Carbamidomethyl(C)@6		1	P08603
sp|P08603|CFAH_HUMAN	SIDVACHPGYALPK	Carbamidomethyl(C)@6		1	P08603
sp|P08603|CFAH_HUMAN	SIDVACHPGYALPK	Carbamidomethyl(C)@6; Carbamidomethyl(H)@7		1	P08603
sp|P08603|CFAH_HUMAN	SIDVACHPGYALPK	Carbamidomethyl(C)@6		1	P08603
sp|P08603|CFAH_HUMAN	SIDVACHPGYALPK	Carbamidomethyl(C)@6		1	P08603
sp|P08603|CFAH_HUMAN	SIDVACHPGYALPK	Carbamidomethyl(C)@6		1	P08603
sp|P08603|CFAH_HUMAN	SIDVACHPGYALPK	Carbamidomethyl(C)@6		1	P08603
sp|P08603|CFAH_HUMAN	SIDVACHPGYALPK	Carbamidomethyl(C)@6		1	P08603
sp|P08603|CFAH_HUMAN	SIDVACHPGYALPK	Carbamidomethyl(C)@6; Carbamidomethyl(H)@7		1	P08603
sp|P08603|CFAH_HUMAN	SIDVACHPGYALPK	Carbamidomethyl(C)@6; Iodo(Y)@10		1	P08603
sp|P08603|CFAH_HUMAN	SIDVACHPGYALPK	Carbamidomethyl(C)@6		1	P08603
sp|P08603|CFAH_HUMAN	SIDVACHPGYALPK	Carbamidomethyl(C)@6		1	P08603
sp|P08603|CFAH_HUMAN	SIDVACHPGYALPK	Carbamidomethyl(C)@6		1	P08603
sp|P08603|CFAH_HUMAN	SIDVACHPGYALPK	Carbamidomethyl(C)@6		1	P08603
sp|P08603|CFAH_HUMAN	SIDVACHPGYALPK	Carbamidomethyl(C)@6		1	P08603
sp|P08603|CFAH_HUMAN	SIDVACHPGYALPK	Carbamidomethyl(C)@6		1	P08603
sp|P08603|CFAH_HUMAN	SIDVACHPGYALPK	Carbamidomethyl(C)@6		1	P08603
sp|P08603|CFAH_HUMAN	SIDVACHPGYALPK	Carbamidomethyl(C)@6		1	P08603
sp|P08603|CFAH_HUMAN	SIDVACHPGYALPK	Carbamidomethyl@N-term; Carbamidomethyl(C)@6		1	P08603
sp|P08603|CFAH_HUMAN	SIDVACHPGYALPK	Carbamidomethyl(C)@6		1	P08603
sp|P08603|CFAH_HUMAN	SITCIHGVWTQLPQCVAIDK	Carbamidomethyl(C)@4; Carbamidomethyl(C)@15		1	P08603
sp|P08603|CFAH_HUMAN	SITCIHGVWTQLPQCVAIDK	Carbamidomethyl(C)@4; Carbamidomethyl(C)@15		1	P08603
sp|P08603|CFAH_HUMAN	SITCIHGVWTQLPQCVAIDK	Carbamidomethyl(C)@4; Carbamidomethyl(C)@15		1	P08603
sp|P08603|CFAH_HUMAN	SITCIHGVWTQLPQCVAIDK	Carbamidomethyl(C)@4; Carbamidomethyl(C)@15		1	P08603
sp|P08603|CFAH_HUMAN	SITCIHGVWTQLPQCVAIDK	Carbamidomethyl(C)@4; Carbamidomethyl(C)@15		1	P08603
sp|P08603|CFAH_HUMAN	SITCIHGVWTQLPQCVAIDK	Carbamidomethyl(C)@4; Carbamidomethyl(C)@15		1	P08603
sp|P08603|CFAH_HUMAN	SITCIHGVWTQLPQCVAIDK	Carbamidomethyl(C)@4; Carbamidomethyl(C)@15		1	P08603
sp|P08603|CFAH_HUMAN	SITCIHGVWTQLPQCVAIDK	Carbamidomethyl(C)@4; Carbamidomethyl(C)@15		1	P08603
sp|P08603|CFAH_HUMAN	SITCIHGVWTQLPQCVAIDK	Carbamidomethyl(C)@4; Carbamidomethyl(C)@15		1	P08603
sp|P08603|CFAH_HUMAN	SITCIHGVWTQLPQCVAIDK	Carbamidomethyl(C)@4; Carbamidomethyl(C)@15		1	P08603
sp|P08603|CFAH_HUMAN	SITCIHGVWTQLPQCVAIDK	Carbamidomethyl(C)@4; Carbamidomethyl(C)@15		1	P08603
sp|P08603|CFAH_HUMAN	SITCIHGVWTQLPQCVAIDK	Carbamidomethyl(C)@4; Deamidated(Q)@14; Carbamidomethyl(C)@15		1	P08603
sp|P08603|CFAH_HUMAN	SITCIHGVWTQLPQCVAIDK	Carbamidomethyl(C)@4; Carbamidomethyl(C)@15		1	P08603
sp|P08603|CFAH_HUMAN	SITCIHGVWTQLPQCVAIDK	Carbamidomethyl(C)@4; Carbamidomethyl(C)@15		1	P08603
sp|P08603|CFAH_HUMAN	SITCIHGVWTQLPQCVAIDK	Carbamidomethyl(C)@4; Carbamidomethyl(C)@15		1	P08603
sp|P08603|CFAH_HUMAN	SITCIHGVWTQLPQCVAIDK	Carbamidomethyl(C)@4; Carbamidomethyl(C)@15		1	P08603
sp|P08603|CFAH_HUMAN	SITCIHGVWTQLPQCVAIDK	Carbamidomethyl(C)@4; Carbamidomethyl(C)@15		1	P08603
sp|P08603|CFAH_HUMAN	SITCIHGVWTQLPQCVAIDK	Carbamidomethyl(C)@4; Carbamidomethyl(C)@15		1	P08603
sp|P08603|CFAH_HUMAN	SITCIHGVWTQLPQCVAIDK	Carbamidomethyl(C)@4; Deamidated(Q)@11; Carbamidomethyl(C)@15		1	P08603
sp|P08603|CFAH_HUMAN	SITCIHGVWTQLPQCVAIDK	Carbamidomethyl(C)@4; Carbamidomethyl(C)@15		1	P08603
sp|P08603|CFAH_HUMAN	SITCIHGVWTQLPQCVAIDK	Carbamidomethyl(C)@4; Carbamidomethyl(C)@15		1	P08603
sp|P08603|CFAH_HUMAN	SITCIHGVWTQLPQCVAIDK	Carbamidomethyl(C)@4; Carbamidomethyl(C)@15		1	P08603
sp|P08603|CFAH_HUMAN	SITCIHGVWTQLPQCVAIDK	Carbamidomethyl(C)@4; Carbamidomethyl(C)@15		1	P08603
sp|P08603|CFAH_HUMAN	SITCIHGVWTQLPQCVAIDK	Carbamidomethyl(C)@4; Dioxidation(W)@9; Deamidated(Q)@14; Carbamidomethyl(C)@15		1	P08603
sp|P08603|CFAH_HUMAN	SITCIHGVWTQLPQCVAIDK	Carbamidomethyl@N-term; Carbamidomethyl(C)@4; Carbamidomethyl(C)@15		1	P08603
sp|P08603|CFAH_HUMAN	SITCIHGVWTQLPQCVAIDK	Carbamidomethyl(C)@4; Carbamidomethyl(C)@15		1	P08603
sp|P08603|CFAH_HUMAN	SITCIHGVWTQLPQCVAIDK	Carbamidomethyl(C)@4; Carbamidomethyl(C)@15		1	P08603
sp|P08603|CFAH_HUMAN	SITCIHGVWTQLPQCVAIDK	Carbamidomethyl(C)@4; Deamidated(Q)@11; Carbamidomethyl(C)@15		1	P08603
sp|P08603|CFAH_HUMAN	SITCIHGVWTQLPQCVAIDK	Carbamidomethyl@N-term; Carbamidomethyl(C)@4; Carbamidomethyl(C)@15		1	P08603
sp|P08603|CFAH_HUMAN	SITCIHGVWTQLPQCVAIDK	Carbamidomethyl(C)@4; Carbamidomethyl(C)@15		1	P08603
sp|P08603|CFAH_HUMAN	SITCIHGVWTQLPQCVAIDK	Carbamidomethyl@N-term; Carbamidomethyl(C)@4; Carbamidomethyl(C)@15		1	P08603
sp|P08603|CFAH_HUMAN	SITCIHGVWTQLPQCVAIDK	Carbamidomethyl(C)@4; Dioxidation(W)@9; Carbamidomethyl(C)@15		1	P08603
sp|P08603|CFAH_HUMAN	SITCIHGVWTQLPQCVAIDK	Carbamidomethyl(C)@4; Oxidation(W)@9; Carbamidomethyl(C)@15		1	P08603
sp|P08603|CFAH_HUMAN	SITCIHGVWTQLPQCVAIDK	Carbamidomethyl(C)@4; Deamidated(Q)@11; Carbamidomethyl(C)@15		1	P08603
sp|P08603|CFAH_HUMAN	SITCIHGVWTQLPQCVAIDK	Carbamidomethyl(C)@4; Carbamidomethyl(C)@15		1	P08603
sp|P08603|CFAH_HUMAN	SITCIHGVWTQLPQCVAIDK	Carbamidomethyl(C)@4; Carbamidomethyl(C)@15		1	P08603
sp|P08603|CFAH_HUMAN	SITCIHGVWTQLPQCVAIDK	Carbamidomethyl(C)@4; Carbamidomethyl(C)@15		1	P08603
sp|P08603|CFAH_HUMAN	SITCIHGVWTQLPQCVAIDKLK	Carbamidomethyl(C)@4; Carbamidomethyl(C)@15	missed K-L@20	1	P08603
sp|P08603|CFAH_HUMAN	SITCIHGVWTQLPQCVAIDKLK	Carbamidomethyl(C)@4; Carbamidomethyl(C)@15	missed K-L@20	1	P08603
sp|P08603|CFAH_HUMAN	SITCIHGVWTQLPQCVAIDKLK	Carbamidomethyl(C)@4; Carbamidomethyl(C)@15	missed K-L@20	1	P08603
sp|P08603|CFAH_HUMAN	SITCIHGVWTQLPQCVAIDKLK	Carbamidomethyl(C)@4; Carbamidomethyl(C)@15	missed K-L@20	1	P08603
sp|P08603|CFAH_HUMAN	SITCIHGVWTQLPQCVAIDKLK	Carbamidomethyl(C)@4; Deamidated(Q)@11; Carbamidomethyl(C)@15	missed K-L@20	1	P08603
sp|P08603|CFAH_HUMAN	SITCIHGVWTQLPQCVAIDKLK	Carbamidomethyl(C)@4; Deamidated(Q)@11; Carbamidomethyl(C)@15	missed K-L@20	1	P08603
sp|P08603|CFAH_HUMAN	SITCIHGVWTQLPQCVAIDKLK	Carbamidomethyl(C)@4; Deamidated(Q)@11; Carbamidomethyl(C)@15	missed K-L@20	1	P08603
sp|P08603|CFAH_HUMAN	SITCIHGVWTQLPQCVAIDKLK	Carbamidomethyl(C)@4; Deamidated(Q)@11; Deamidated(Q)@14; Carbamidomethyl(C)@15	missed K-L@20	1	P08603
sp|P08603|CFAH_HUMAN	SITCIHGVWTQLPQCVAIDKLK	Carbamidomethyl(C)@4; Carbamidomethyl(C)@15	missed K-L@20	1	P08603
sp|P08603|CFAH_HUMAN	SITCIHGVWTQLPQCVAIDKLK	Carbamidomethyl(C)@4; Dioxidation(W)@9; Carbamidomethyl(C)@15	missed K-L@20	1	P08603
sp|P08603|CFAH_HUMAN	SITCIHGVWTQLPQCVAIDKLK	Carbamidomethyl(C)@4; Dioxidation(W)@9; Deamidated(Q)@14; Carbamidomethyl(C)@15	missed K-L@20	1	P08603
sp|P08603|CFAH_HUMAN	SITCIHGVWTQLPQCVAIDKLK	Carbamidomethyl(C)@4; Carbamidomethyl(C)@15	missed K-L@20	1	P08603
sp|P08603|CFAH_HUMAN	SITCIHGVWTQLPQCVAIDKLK	Carbamidomethyl(C)@4; Carbamidomethyl(C)@15	missed K-L@20	1	P08603
sp|P08603|CFAH_HUMAN	SITCIHGVWTQLPQCVAIDKLK	Carbamidomethyl(C)@4; Carbamidomethyl(C)@15	missed K-L@20	1	P08603
sp|P08603|CFAH_HUMAN	SITCIHGVWTQLPQCVAIDKLKK	Carbamidomethyl(C)@4; Carbamidomethyl(C)@15	missed K-L@20; missed K-K@22	1	P08603
sp|P08603|CFAH_HUMAN	SITCIHGVWTQLPQCVAIDKLKK	Carbamidomethyl(C)@4; Carbamidomethyl(C)@15	missed K-L@20; missed K-K@22	1	P08603
sp|P08603|CFAH_HUMAN	SITCIHGVWTQLPQCVAIDKLKK	Carbamidomethyl(C)@4; Carbamidomethyl(C)@15	missed K-L@20; missed K-K@22	1	P08603
sp|P08603|CFAH_HUMAN	SITCIHGVWTQLPQCVAIDKLKK	Carbamidomethyl(C)@4; Carbamidomethyl(C)@15	missed K-L@20; missed K-K@22	1	P08603
sp|P08603|CFAH_HUMAN	SITCIHGVWTQLPQCVAIDKLKK	Carbamidomethyl(C)@4; Carbamidomethyl(C)@15	missed K-L@20; missed K-K@22	1	P08603
sp|P08603|CFAH_HUMAN	SITCIHGVWTQLPQCVAIDKLKK	Carbamidomethyl(C)@4; Carbamidomethyl(C)@15	missed K-L@20; missed K-K@22	1	P08603
sp|P08603|CFAH_HUMAN	SITCIHGVWTQLPQCVAIDKLKK	Carbamidomethyl(C)@4; Carbamidomethyl(C)@15	missed K-L@20; missed K-K@22	1	P08603
sp|P08603|CFAH_HUMAN	SITCIHGVWTQLPQCVAIDKLKK	Carbamidomethyl(C)@4; Carbamidomethyl(C)@15	missed K-L@20; missed K-K@22	1	P08603
sp|P08603|CFAH_HUMAN	SITCIHGVWTQLPQCVAIDKLKK	Carbamidomethyl(C)@4; Deamidated(Q)@11; Carbamidomethyl(C)@15	missed K-L@20; missed K-K@22	1	P08603
sp|P08603|CFAH_HUMAN	SITCIHGVWTQLPQCVAIDKLKK	Carbamidomethyl(C)@4; Carbamidomethyl(C)@15	missed K-L@20; missed K-K@22	1	P08603
sp|P08603|CFAH_HUMAN	SITCIHGVWTQLPQCVAIDKLKK	Carbamidomethyl(C)@4; Carbamidomethyl(C)@15	missed K-L@20; missed K-K@22	1	P08603
sp|P08603|CFAH_HUMAN	SITCIHGVWTQLPQCVAIDKLKK	Carbamidomethyl(C)@4; Carbamidomethyl(C)@15	missed K-L@20; missed K-K@22	1	P08603
sp|P08603|CFAH_HUMAN	SITCIHGVWTQLPQCVAIDKLKK	Carbamidomethyl(C)@4; Deamidated(Q)@14; Carbamidomethyl(C)@15	missed K-L@20; missed K-K@22	1	P08603
sp|P08603|CFAH_HUMAN	SITCIHGVWTQLPQCVAIDKLKK	Carbamidomethyl(C)@4; Carbamidomethyl(C)@15	missed K-L@20; missed K-K@22	1	P08603
sp|P08603|CFAH_HUMAN	SITCIHGVWTQLPQCVAIDKLKK	Carbamidomethyl(C)@4; Deamidated(Q)@11; Carbamidomethyl(C)@15	missed K-L@20; missed K-K@22	1	P08603
sp|P08603|CFAH_HUMAN	SITCIHGVWTQLPQCVAIDKLKK	Carbamidomethyl(C)@4; Carbamidomethyl(C)@15	missed K-L@20; missed K-K@22	1	P08603
sp|P08603|CFAH_HUMAN	SITCIHGVWTQLPQCVAIDKLKK	Carbamidomethyl(C)@4; Carbamidomethyl(C)@15	missed K-L@20; missed K-K@22	1	P08603
sp|P08603|CFAH_HUMAN	SITCIHGVWTQLPQCVAIDKLKK	Carbamidomethyl(C)@4; Carbamidomethyl(C)@15	missed K-L@20; missed K-K@22	1	P08603
sp|P08603|CFAH_HUMAN	SLGNVIMVCR	Oxidation(M)@7; Carbamidomethyl(C)@9		1	P08603
sp|P08603|CFAH_HUMAN	SLGNVIMVCR	Oxidation(M)@7; Carbamidomethyl(C)@9		1	P08603
sp|P08603|CFAH_HUMAN	SLGNVIMVCR	Oxidation(M)@7; Carbamidomethyl(C)@9		1	P08603
sp|P08603|CFAH_HUMAN	SLGNVIMVCR	Oxidation(M)@7; Carbamidomethyl(C)@9		1	P08603
sp|P08603|CFAH_HUMAN	SLGNVIMVCR	Oxidation(M)@7; Carbamidomethyl(C)@9		1	P08603
sp|P08603|CFAH_HUMAN	SLGNVIMVCR	Oxidation(M)@7; Carbamidomethyl(C)@9		1	P08603
sp|P08603|CFAH_HUMAN	SLGNVIMVCR	Carbamidomethyl(C)@9		1	P08603
sp|P08603|CFAH_HUMAN	SLGNVIMVCR	Oxidation(M)@7; Carbamidomethyl(C)@9		1	P08603
sp|P08603|CFAH_HUMAN	SLGNVIMVCR	Carbamidomethyl(C)@9		1	P08603
sp|P08603|CFAH_HUMAN	SLGNVIMVCR	Oxidation(M)@7; Carbamidomethyl(C)@9		1	P08603
sp|P08603|CFAH_HUMAN	SLGNVIMVCR	Oxidation(M)@7; Carbamidomethyl(C)@9		1	P08603
sp|P08603|CFAH_HUMAN	SLGNVIMVCR	Carbamidomethyl(C)@9		1	P08603
sp|P08603|CFAH_HUMAN	SLGNVIMVCR	Deamidated(N)@4; Carbamidomethyl(C)@9		1	P08603
sp|P08603|CFAH_HUMAN	SLGNVIMVCR	Carbamidomethyl(C)@9		1	P08603
sp|P08603|CFAH_HUMAN	SLGNVIMVCR	Carbamidomethyl(C)@9		1	P08603
sp|P08603|CFAH_HUMAN	SLGNVIMVCR	Carbamidomethyl(C)@9		1	P08603
sp|P08603|CFAH_HUMAN	SLGNVIMVCR	Carbamidomethyl(C)@9		1	P08603
sp|P08603|CFAH_HUMAN	SLGNVIMVCR	Carbamidomethyl(C)@9		1	P08603
sp|P08603|CFAH_HUMAN	SLGNVIMVCR	Carbamidomethyl(C)@9		1	P08603
sp|P08603|CFAH_HUMAN	SLGNVIMVCR	Carbamidomethyl(C)@9		1	P08603
sp|P08603|CFAH_HUMAN	SLGNVIMVCR	Carbamidomethyl(C)@9		1	P08603
sp|P08603|CFAH_HUMAN	SLGNVIMVCR	Carbamidomethyl(C)@9		1	P08603
sp|P08603|CFAH_HUMAN	SLGNVIMVCR	Carbamidomethyl(C)@9		1	P08603
sp|P08603|CFAH_HUMAN	SLGNVIMVCR	Carbamidomethyl(C)@9		1	P08603
sp|P08603|CFAH_HUMAN	SLGNVIMVCR	Carbamidomethyl(C)@9		1	P08603
sp|P08603|CFAH_HUMAN	SLGNVIMVCR	Carbamidomethyl(C)@9		1	P08603
sp|P08603|CFAH_HUMAN	SLGNVIMVCR	Carbamidomethyl(C)@9		1	P08603
sp|P08603|CFAH_HUMAN	SLGNVIMVCR	Methyl(N)@4; Carbamidomethyl(C)@9		1	P08603
sp|P08603|CFAH_HUMAN	SLGNVIMVCR	Methyl(N)@4; Carbamidomethyl(C)@9		1	P08603
sp|P08603|CFAH_HUMAN	SLGNVIMVCR	Methyl(N)@4; Carbamidomethyl(C)@9		1	P08603
sp|P08603|CFAH_HUMAN	SLGNVIMVCR	Methyl(N)@4; Carbamidomethyl(C)@9		1	P08603
sp|P08603|CFAH_HUMAN	SLGNVIMVCR	Methyl(N)@4; Carbamidomethyl(C)@9		1	P08603
sp|P08603|CFAH_HUMAN	SLGNVIMVCR	Carbamidomethyl(C)@9		1	P08603
sp|P08603|CFAH_HUMAN	SLGNVIMVCR	Carbamidomethyl@N-term; Carbamidomethyl(C)@9		1	P08603
sp|P08603|CFAH_HUMAN	SLGNVIMVCR	Carbamidomethyl(C)@9		1	P08603
sp|P08603|CFAH_HUMAN	SLGNVIMVCR	Carbamidomethyl@N-term; Carbamidomethyl(C)@9		1	P08603
sp|P08603|CFAH_HUMAN	SLGNVIMVCR	Carbamidomethyl@N-term; Carbamidomethyl(C)@9		1	P08603
sp|P08603|CFAH_HUMAN	SLGNVIMVCR	Carbamidomethyl@N-term; Carbamidomethyl(C)@9		1	P08603
sp|P08603|CFAH_HUMAN	SLGNVIMVCR	Carbamidomethyl(C)@9		1	P08603
sp|P08603|CFAH_HUMAN	SLGNVIMVCR	Carbamidomethyl(C)@9		1	P08603
sp|P08603|CFAH_HUMAN	SLGNVIMVCR	Carbamidomethyl(C)@9		1	P08603
sp|P08603|CFAH_HUMAN	SLGNVIMVCR	Oxidation(M)@7; Carbamidomethyl(C)@9		1	P08603
sp|P08603|CFAH_HUMAN	SLGNVIMVCR	Carbamidomethyl(C)@9		1	P08603
sp|P08603|CFAH_HUMAN	SLGNVIMVCR	Carbamidomethyl(C)@9		1	P08603
sp|P08603|CFAH_HUMAN	SLGNVIMVCR	Carbamidomethyl(C)@9		1	P08603
sp|P08603|CFAH_HUMAN	SLGNVIMVCR	Carbamidomethyl(C)@9		1	P08603
sp|P08603|CFAH_HUMAN	SLGNVIMVCR	Methyl(N)@4; Carbamidomethyl(C)@9		1	P08603
sp|P08603|CFAH_HUMAN	SLGNVIMVCR	Oxidation(M)@7; Carbamidomethyl(C)@9		1	P08603
sp|P08603|CFAH_HUMAN	SLGNVIMVCR	Carbamidomethyl(C)@9		1	P08603
sp|P08603|CFAH_HUMAN	SLGNVIMVCR	Carbamidomethyl(C)@9		1	P08603
sp|P08603|CFAH_HUMAN	SLGNVIMVCR	Carbamidomethyl(C)@9		1	P08603
sp|P08603|CFAH_HUMAN	SLGNVIMVCR	Carbamidomethyl(C)@9		1	P08603
sp|P08603|CFAH_HUMAN	SLGNVIMVCR	Carbamidomethyl(C)@9		1	P08603
sp|P08603|CFAH_HUMAN	SLGNVIMVCR	Methyl(N)@4; Carbamidomethyl(C)@9		1	P08603
sp|P08603|CFAH_HUMAN	SLGNVIMVCR	Carbamidomethyl(C)@9		1	P08603
sp|P08603|CFAH_HUMAN	SLGNVIMVCR	Carbamidomethyl(C)@9		1	P08603
sp|P08603|CFAH_HUMAN	SLGNVIMVCR	Carbamidomethyl(C)@9		1	P08603
sp|P08603|CFAH_HUMAN	SLGNVIMVCR	Oxidation(M)@7; Carbamidomethyl(C)@9		1	P08603
sp|P08603|CFAH_HUMAN	SLGNVIMVCR	Carbamidomethyl(C)@9		1	P08603
sp|P08603|CFAH_HUMAN	SLGNVIMVCR	Carbamidomethyl(C)@9		1	P08603
sp|P08603|CFAH_HUMAN	SLGNVIMVCR	Carbamidomethyl@N-term; Carbamidomethyl(C)@9		1	P08603
sp|P08603|CFAH_HUMAN	SLGNVIMVCR	Carbamidomethyl(C)@9		1	P08603
sp|P08603|CFAH_HUMAN	SLGNVIMVCR	Oxidation(M)@7; Carbamidomethyl(C)@9		1	P08603
sp|P08603|CFAH_HUMAN	SLGNVIMVCR	Oxidation(M)@7; Carbamidomethyl(C)@9		1	P08603
sp|P08603|CFAH_HUMAN	SLGNVIMVCR	Methyl(N)@4; Oxidation(M)@7; Carbamidomethyl(C)@9		1	P08603
sp|P08603|CFAH_HUMAN	SLGNVIMVCR	Carbamidomethyl(C)@9		1	P08603
sp|P08603|CFAH_HUMAN	SLGNVIMVCR	Methyl(N)@4; Carbamidomethyl(C)@9		1	P08603
sp|P08603|CFAH_HUMAN	SLGNVIMVCR	Methyl(N)@4; Carbamidomethyl(C)@9		1	P08603
sp|P08603|CFAH_HUMAN	SLGNVIMVCR	Carbamidomethyl(C)@9		1	P08603
sp|P08603|CFAH_HUMAN	SLGNVIMVCR	Methyl(N)@4; Carbamidomethyl(C)@9		1	P08603
sp|P08603|CFAH_HUMAN	SLGNVIMVCR	Methyl(N)@4; Carbamidomethyl(C)@9		1	P08603
sp|P08603|CFAH_HUMAN	SLGNVIMVCR	Methyl(N)@4; Carbamidomethyl(C)@9		1	P08603
sp|P08603|CFAH_HUMAN	SLGNVIMVCR	Methyl(N)@4; Carbamidomethyl(C)@9		1	P08603
sp|P08603|CFAH_HUMAN	SLGNVIMVCR	Methyl(N)@4; Carbamidomethyl(C)@9		1	P08603
sp|P08603|CFAH_HUMAN	SLGNVIMVCR	Carbamidomethyl(C)@9		1	P08603
sp|P08603|CFAH_HUMAN	SLGNVIMVCR	Carbamyl(M)@7; Carbamidomethyl(C)@9		1	P08603
sp|P08603|CFAH_HUMAN	SLGNVIMVCR	Oxidation(M)@7; Carbamidomethyl(C)@9		1	P08603
sp|P08603|CFAH_HUMAN	SLGNVIMVCR	Carbamidomethyl(C)@9		1	P08603
sp|P08603|CFAH_HUMAN	SLGNVIMVCR	Methyl(N)@4; Carbamidomethyl(C)@9		1	P08603
sp|P08603|CFAH_HUMAN	SLGNVIMVCR	Carbamidomethyl(C)@9		1	P08603
sp|P08603|CFAH_HUMAN	SLGNVIMVCR	Deamidated(N)@4; Oxidation(M)@7; Carbamidomethyl(C)@9		1	P08603
sp|P08603|CFAH_HUMAN	SLGNVIMVCR	Carbamyl(M)@7; Carbamidomethyl(C)@9		1	P08603
sp|P08603|CFAH_HUMAN	SLGNVIMVCR	Deamidated(N)@4; Oxidation(M)@7; Carbamidomethyl(C)@9		1	P08603
[truncated: 56,842 more rows]

## Sheet: SEC
Accessions	Sequence	Modifications	Cleavages	Uniqueness	Matching PMIDs
sp|P08603|CFAH_HUMAN	AGEQVTYTCATYYK	Carbamidomethyl(C)@9		1	P08603
sp|P08603|CFAH_HUMAN	AQTTVTCMENGWSPTPR	Carbamidomethyl(C)@7		1	P08603
sp|P08603|CFAH_HUMAN	AVYTCNEGYQLLGEINYR	Carbamidomethyl(C)@5		1	P08603
sp|P08603|CFAH_HUMAN	CFEGFGIDGPAIAK	Carbamidomethyl(C)@1		1	P08603
sp|P08603|CFAH_HUMAN	CGPPPPIDNGDITSFPLSVYAPASSVEYQCQNLYQLEGNKR	Carbamidomethyl(C)@1; Carbamidomethyl(C)@30	missed K-R@40	2	P08603, Q03591
sp|P08603|CFAH_HUMAN	CKSSNLIILEEHLK	Carbamidomethyl(C)@1; Ammonia-loss(N)@5	missed K-S@2	1	P08603
sp|P08603|CFAH_HUMAN	CLGEKWSHPPSCIK	Carbamidomethyl(C)@1; Carbamidomethyl(C)@12	missed K-W@5	1	P08603
sp|P08603|CFAH_HUMAN	CLHPCVISR	Carbamidomethyl(C)@1; Carbamidomethyl(C)@5		2	P08603, Q03591
sp|P08603|CFAH_HUMAN	CLPVTAPENGK	Carbamidomethyl(C)@1; Deamidated(N)@9		1	P08603
sp|P08603|CFAH_HUMAN	CLPVTAPENGKIVSSAMEPDREYHFGQAVR	Carbamidomethyl(C)@1	missed K-I@11; missed R-E@21	1	P08603
sp|P08603|CFAH_HUMAN	CNMGYEYSER	Carbamidomethyl(C)@1; Ammonia-loss(N)@2		1	P08603
sp|P08603|CFAH_HUMAN	CTLKPCDYPDIK	Carbamidomethyl(C)@1; Carbamidomethyl(C)@6		1	P08603
sp|P08603|CFAH_HUMAN	CTSTGWIPAPR	Carbamidomethyl(C)@1		1	P08603
sp|P08603|CFAH_HUMAN	CVEISCKSPDVINGSPISQK	Carbamidomethyl(C)@1; Carbamidomethyl(C)@6	missed K-S@7	1	P08603
sp|P08603|CFAH_HUMAN	CYFPYLENGYNQNYGR	Carbamidomethyl(C)@1		2	P08603, Q02985
sp|P08603|CFAH_HUMAN	CYFPYLENGYNQNYGRK	Carbamidomethyl(C)@1; Ammonia-loss(N)@8	missed R-K@16	2	P08603, Q02985
sp|P08603|CFAH_HUMAN	DGEKVSVLCQENYLIQEGEEITCKDGR	Carbamidomethyl(C)@9; Carbamidomethyl(C)@23	missed K-V@4; missed K-D@24	1	P08603
sp|P08603|CFAH_HUMAN	DGRWQSIPLCVEK	Carbamidomethyl(C)@10	missed R-W@3	1	P08603
sp|P08603|CFAH_HUMAN	DGWSAQPTCIK	Carbamidomethyl(C)@9		1	P08603
sp|P08603|CFAH_HUMAN	DQYKVGEVLK		missed K-V@4	1	P08603
sp|P08603|CFAH_HUMAN	DTSCVNPPTVQNAYIVSR	Carbamidomethyl(C)@4		1	P08603
sp|P08603|CFAH_HUMAN	DVACHPGYALPK	Carbamidomethyl(C)@4	cleaved I-D@N-term	1	P08603
sp|P08603|CFAH_HUMAN	DVHLVPDR		cleaved I-D@N-term	1	P08603
sp|P08603|CFAH_HUMAN	DVINGSPISQK		cleaved P-D@N-term	1	P08603
sp|P08603|CFAH_HUMAN	DVYKAGEQVTYTCATYYK	Carbamidomethyl(C)@13	missed K-A@4	1	P08603
sp|P08603|CFAH_HUMAN	ECDTDGWTNDIPICEVVK	Carbamidomethyl(C)@2; Carbamidomethyl(C)@14		1	P08603
sp|P08603|CFAH_HUMAN	ECELPKIDVHLVPDR	Carbamidomethyl(C)@2	missed K-I@6	1	P08603
sp|P08603|CFAH_HUMAN	ECELPKIDVHLVPDRKKDQYK	Carbamidomethyl(C)@2	missed K-I@6; missed R-K@15; missed K-K@16; missed K-D@17	1	P08603
sp|P08603|CFAH_HUMAN	EDCNELPPR	Carbamidomethyl(C)@3	cleaved A-E@N-term	1	P08603
sp|P08603|CFAH_HUMAN	EDCNELPPRR	Glu->pyro-Glu@N-term; Carbamidomethyl(C)@3	cleaved A-E@N-term; missed R-R@9	1	P08603
sp|P08603|CFAH_HUMAN	EDCNELPPRRNTEILTGSWSDQTYPEGTQAIYK	Carbamidomethyl(C)@3	cleaved A-E@N-term; missed R-R@9; missed R-N@10	1	P08603
sp|P08603|CFAH_HUMAN	EGWIHTVCINGR	Carbamidomethyl(C)@8		1	P08603
sp|P08603|CFAH_HUMAN	EIMENYNIALR			2	P08603, Q03591
sp|P08603|CFAH_HUMAN	EKPKCVEISCKSPDVINGSPISQK	Carbamidomethyl(C)@5; Carbamidomethyl(C)@10	missed K-C@4; missed K-S@11	1	P08603
sp|P08603|CFAH_HUMAN	EKTKEEYGHSEVVEYYCNPR	Carbamidomethyl(C)@17	missed K-T@2; missed K-E@4	1	P08603
sp|P08603|CFAH_HUMAN	EQVQSCGPPPELLNGNVK	Carbamidomethyl(C)@6		1	P08603
sp|P08603|CFAH_HUMAN	EQVQSCGPPPELLNGNVKEK	Carbamidomethyl(C)@6	missed K-E@18	1	P08603
sp|P08603|CFAH_HUMAN	FSCKPGFTIVGP	Carbamidomethyl(C)@3	cleaved P-N@C-term	1	P08603
sp|P08603|CFAH_HUMAN	FSCKPGFTIVGPNSVQCYHFGLSPDLPICKEQVQSCGPPPELLNGNVKEK	Carbamidomethyl(C)@3; Carbamidomethyl(C)@17; Carbamidomethyl(C)@29; Carbamidomethyl(C)@36	missed K-E@30; missed K-E@48	1	P08603
sp|P08603|CFAH_HUMAN	FVCNSGYK	Carbamidomethyl(C)@3		1	P08603
sp|P08603|CFAH_HUMAN	FVCNSGYKIEGDEEMHCSDDGFWSK	Carbamidomethyl(C)@3; Carbamidomethyl(C)@17	missed K-I@8	1	P08603
sp|P08603|CFAH_HUMAN	FVCNSGYKIEGDEEMHCSDDGFWSKEKPK	Carbamidomethyl(C)@3; Carbamidomethyl(C)@17	missed K-I@8; missed K-E@25	1	P08603
sp|P08603|CFAH_HUMAN	GEWVALNPLR			1	P08603
sp|P08603|CFAH_HUMAN	GEWVALNPLRK		missed R-K@10	1	P08603
sp|P08603|CFAH_HUMAN	GKEGWIHTVCINGR	Carbamidomethyl(C)@10	missed K-E@2	1	P08603
sp|P08603|CFAH_HUMAN	GWSDLPICYER	Carbamidomethyl(C)@8	cleaved N-G@N-term	1	P08603
sp|P08603|CFAH_HUMAN	GWSPAVPCLR	Carbamidomethyl(C)@8	cleaved D-G@N-term	2	P08603, Q02985
sp|P08603|CFAH_HUMAN	GWSPTPR		cleaved N-G@N-term	3	P08603, Q02985, O95407
sp|P08603|CFAH_HUMAN	HGGLYHENMR			2	P08603, Q02985
sp|P08603|CFAH_HUMAN	IDVHLVPDR			1	P08603
sp|P08603|CFAH_HUMAN	IDVHLVPDRKKDQYK		missed R-K@9; missed K-K@10; missed K-D@11	1	P08603
sp|P08603|CFAH_HUMAN	IDVHLVPDRKKDQYKVGEVLK		missed R-K@9; missed K-K@10; missed K-D@11; missed K-V@15	1	P08603
sp|P08603|CFAH_HUMAN	IEGDEEMHCSDDGFWSK	Carbamidomethyl(C)@9		1	P08603
sp|P08603|CFAH_HUMAN	IIYKENERFQYK		missed K-E@4; missed R-F@8	1	P08603
sp|P08603|CFAH_HUMAN	ISEENETTCYMGK	Carbamidomethyl(C)@9		1	P08603
sp|P08603|CFAH_HUMAN	IVSSAMEPDR			1	P08603
sp|P08603|CFAH_HUMAN	IVSSAMEPDREYHFGQAVR		missed R-E@10	1	P08603
sp|P08603|CFAH_HUMAN	KCYFPYLENGYN	Carbamidomethyl(C)@2	cleaved N-Q@C-term; missed K-C@1	2	P08603, Q02985
sp|P08603|CFAH_HUMAN	KCYFPYLENGYNQNYGR	Carbamidomethyl(C)@2; Oxidation(Y)@15; Arg->Orn(R)@17	missed K-C@1	2	P08603, Q02985
sp|P08603|CFAH_HUMAN	KCYFPYLENGYNQNYGRK	Carbamidomethyl(C)@2	missed K-C@1; missed R-K@17	2	P08603, Q02985
sp|P08603|CFAH_HUMAN	KDVYKAGEQVTYTCATYYK	Carbamidomethyl(C)@14	missed K-D@1; missed K-A@5	1	P08603
sp|P08603|CFAH_HUMAN	KGEWVALN		cleaved N-P@C-term; missed K-G@1	1	P08603
sp|P08603|CFAH_HUMAN	KGEWVALNPLR		missed K-G@1	1	P08603
sp|P08603|CFAH_HUMAN	KGEWVALNPLRK		missed K-G@1; missed R-K@11	1	P08603
sp|P08603|CFAH_HUMAN	KKDQYKVGEVLK		missed K-K@1; missed K-D@2; missed K-V@6	1	P08603
sp|P08603|CFAH_HUMAN	LGYVTADGETSGSITCGK	Carbamidomethyl(C)@16		1	P08603
sp|P08603|CFAH_HUMAN	LGYVTADGETSGSITCGKDGWSAQPTCIK	Carbamidomethyl(C)@16; Carbamidomethyl(C)@27	missed K-D@18	1	P08603
sp|P08603|CFAH_HUMAN	LSYTCEGGFR	Carbamidomethyl(C)@5		1	P08603
sp|P08603|CFAH_HUMAN	NDFTWFK			1	P08603
sp|P08603|CFAH_HUMAN	NGFYPATR	Deamidated(N)@1		1	P08603
sp|P08603|CFAH_HUMAN	NGQWSEPPK			3	P08603, P36980, Q03591
sp|P08603|CFAH_HUMAN	NGQWSEPPKCLHPCVISR	Deamidated(N)@1; Carbamidomethyl(C)@10; Carbamidomethyl(C)@14	missed K-C@9	2	P08603, Q03591
sp|P08603|CFAH_HUMAN	NKKEFDHNSNIR		missed K-K@2; missed K-E@3	1	P08603
sp|P08603|CFAH_HUMAN	NSVQCYHFGLSPDLPICK	Carbamidomethyl(C)@5; Carbamidomethyl(C)@17	cleaved P-N@N-term	1	P08603
sp|P08603|CFAH_HUMAN	NTEILTGSWSDQTYPEGTQAIYK			1	P08603
sp|P08603|CFAH_HUMAN	PPEISHGVVAHMSDSYQYGEEVTYK	Carbamidomethyl@N-term; Oxidation(P)@2	cleaved S-P@N-term	1	P08603
sp|P08603|CFAH_HUMAN	QMSKYPSGER	Gln->pyro-Glu@N-term	missed K-Y@4	2	P08603, Q03591
sp|P08603|CFAH_HUMAN	RNTEILTGSWSDQTYPEGTQAIYK	Deamidated(Q)@13	missed R-N@1	1	P08603
sp|P08603|CFAH_HUMAN	RPYFPVAVGK			2	P08603, Q02985
sp|P08603|CFAH_HUMAN	SCDIPVFMNAR	Carbamidomethyl(C)@2		1	P08603
sp|P08603|CFAH_HUMAN	SCDNPYIPNGDYSPLR	Carbamidomethyl(C)@2		1	P08603
sp|P08603|CFAH_HUMAN	SIDVACHPGYALPK	Carbamidomethyl(C)@6		1	P08603
sp|P08603|CFAH_HUMAN	SITCIHGVWTQLPQCVAIDK	Carbamidomethyl(C)@4; Carbamidomethyl(C)@15		1	P08603
sp|P08603|CFAH_HUMAN	SITCIHGVWTQLPQCVAIDKLKK	Carbamidomethyl(C)@4; Carbamidomethyl(C)@15	missed K-L@20; missed K-K@22	1	P08603
sp|P08603|CFAH_HUMAN	SLGNVIMVCR	Carbamidomethyl(C)@9		1	P08603
sp|P08603|CFAH_HUMAN	SPDVINGSPISQK			1	P08603
sp|P08603|CFAH_HUMAN	SPPEISHGVVAHMSDSYQYGEEVTYK			1	P08603
sp|P08603|CFAH_HUMAN	SSIDIENGFISESQYTYALK			1	P08603
sp|P08603|CFAH_HUMAN	SSIDIENGFISESQYTYALKEK		missed K-E@20	1	P08603
sp|P08603|CFAH_HUMAN	SSNLIILEEHLK			1	P08603
sp|P08603|CFAH_HUMAN	SSQESYAHGTKLSYTCEGGFR	Deamidated(Q)@3; Carbamidomethyl(C)@16	missed K-L@11	1	P08603
sp|P08603|CFAH_HUMAN	STGWIPAPR		cleaved T-S@N-term	1	P08603
sp|P08603|CFAH_HUMAN	TDCLSLPSFENAIPMGEK	Carbamidomethyl(C)@3		1	P08603
sp|P08603|CFAH_HUMAN	TDCLSLPSFENAIPMGEKK	Carbamidomethyl(C)@3	missed K-K@18	1	P08603
sp|P08603|CFAH_HUMAN	TDCLSLPSFENAIPMGEKKDVYK	Carbamidomethyl(C)@3	missed K-K@18; missed K-D@19	1	P08603
sp|P08603|CFAH_HUMAN	TDCLSLPSFENAIPMGEKKDVYKAGEQVTYTCATYYK	Carbamidomethyl(C)@3; Carbamidomethyl(C)@32	missed K-K@18; missed K-D@19; missed K-A@23	1	P08603
sp|P08603|CFAH_HUMAN	TGDEITYQCR	Carbamidomethyl(C)@9		1	P08603
sp|P08603|CFAH_HUMAN	TGESVEFVCK	Carbamidomethyl(C)@9		2	P08603, Q03591
sp|P08603|CFAH_HUMAN	TGESVEFVCKR	Carbamidomethyl(C)@9	missed K-R@10	2	P08603, Q03591
sp|P08603|CFAH_HUMAN	TKEEYGHSEVVEYYCNPR	Carbamidomethyl(C)@15	missed K-E@2	1	P08603
sp|P08603|CFAH_HUMAN	TKNDFTWFK		missed K-N@2	1	P08603
sp|P08603|CFAH_HUMAN	TTCWDGKLEYPTCA	Carbamidomethyl(C)@3; Carbamidomethyl(C)@13	cleaved A-K@C-term; missed K-L@7	2	P08603, Q03591
sp|P08603|CFAH_HUMAN	TTCWDGKLEYPTCAK	Carbamidomethyl(C)@3; Carbamidomethyl(C)@13	missed K-L@7	2	P08603, Q03591
sp|P08603|CFAH_HUMAN	TTCWDGKLEYPTCAKR	Carbamidomethyl(C)@3; Carbamidomethyl(C)@13	missed K-L@7; missed K-R@15	2	P08603, Q03591
sp|P08603|CFAH_HUMAN	VSVLCQENYLIQEGEEITCK	Carbamidomethyl(C)@5; Carbamidomethyl(C)@19		1	P08603
sp|P08603|CFAH_HUMAN	VSVLCQENYLIQEGEEITCKDGR	Carbamidomethyl(C)@5; Carbamidomethyl(C)@19	missed K-D@20	1	P08603
sp|P08603|CFAH_HUMAN	WQSIPLCVEK	Carbamidomethyl(C)@7		1	P08603
sp|P08603|CFAH_HUMAN	WSHPPSCIK	Carbamidomethyl(C)@7		1	P08603
sp|P08603|CFAH_HUMAN	WSHPPSCIKTDCLSLPSFENAIPMGEK	Carbamidomethyl(C)@7; Carbamidomethyl(C)@12	missed K-T@9	1	P08603
sp|P08603|CFAH_HUMAN	WSHPPSCIKTDCLSLPSFENAIPMGEKK	Carbamidomethyl(C)@7; Carbamidomethyl(C)@12	missed K-T@9; missed K-K@27	1	P08603
sp|P08603|CFAH_HUMAN	WSSPPQCEGLPCK	Carbamidomethyl(C)@7; Carbamidomethyl(C)@12		1	P08603
sp|P08603|CFAH_HUMAN	WTGRPTCRDTSCVNPPTVQNAYIVSR	Carbamidomethyl(C)@7; Carbamidomethyl(C)@12	missed R-D@8	1	P08603
sp|P08603|CFAH_HUMAN	YFPVAVGK		cleaved P-Y@N-term	2	P08603, Q02985
sp|P08603|CFAH_HUMAN	YVTADGETSGSITCGK	Carbamidomethyl(C)@14	cleaved G-Y@N-term	1	P08603
sp|P08603|CFAH_HUMAN	IIYKENER		missed K-E@4	1	P08603
sp|P08603|CFAH_HUMAN	FSCKPGFTIVGPNSVQCYHFGLSPDLPICKEQVQSCGPPPELLNGNVK	Carbamidomethyl(C)@3; Carbamidomethyl(C)@17; Carbamidomethyl(C)@29; Carbamidomethyl(C)@36	missed K-E@30	1	P08603
sp|P08603|CFAH_HUMAN	SITCIHGVWTQLPQCVAIDKLK	Carbamidomethyl(C)@4; Deamidated(Q)@11; Deamidated(Q)@14; Carbamidomethyl(C)@15	missed K-L@20	1	P08603
sp|P08603|CFAH_HUMAN	EFDHNSNIR	Glu->pyro-Glu@N-term		1	P08603
sp|P08603|CFAH_HUMAN	DSTGKCGPPPPIDNGDITSFPLSVYAPASSVEYQCQNLYQLEGNKR	Carbamidomethyl(C)@6; Carbamidomethyl(C)@35	missed K-C@5; missed K-R@45	2	P08603, Q03591
sp|P08603|CFAH_HUMAN	ECELPKIDVHLVPDRK	Carbamidomethyl(C)@2	missed K-I@6; missed R-K@15	1	P08603
sp|P08603|CFAH_HUMAN	ITCRNGQWSEPPK	Carbamidomethyl(C)@3	missed R-N@4	3	P08603, P36980, Q03591
sp|P08603|CFAH_HUMAN	WSSPPQCEGLPCKSPPEISHGVVAHMSDSYQYGEEVTYK	Carbamidomethyl(C)@7; Carbamidomethyl(C)@12	missed K-S@13	1	P08603
sp|P08603|CFAH_HUMAN	CNMGYEYSERGDAVCTESGWRPLPSCEEK	Carbamidomethyl(C)@1; Ammonia-loss(N)@2; Carbamidomethyl(C)@15; Carbamidomethyl(C)@26	missed R-G@10	1	P08603
sp|P08603|CFAH_HUMAN	QKLYSR	Gln->pyro-Glu@N-term	missed K-L@2	4	Q6ZNE5, P08603, P36980, Q9GZU2
sp|P08603|CFAH_HUMAN	SLGNVIMVCRK	Carbamidomethyl(C)@9	missed R-K@10	1	P08603
sp|P08603|CFAH_HUMAN	WSHPPSCIKTDCLSLPSFENAIPMGEKKDVYK	Carbamidomethyl(C)@7; Carbamidomethyl(C)@12	missed K-T@9; missed K-K@27; missed K-D@28	1	P08603
sp|P08603|CFAH_HUMAN	GEVLK		cleaved V-G@N-term	NA, length less than 6
sp|P08603|CFAH_HUMAN	TGDEITYQCRNGFYPATR	Carbamidomethyl(C)@9; Deamidated(N)@11	missed R-N@10	1	P08603
sp|P08603|CFAH_HUMAN	DTSCVNPPTVQNAY	Carbamidomethyl(C)@4	cleaved Y-I@C-term	2	P08603, Q03591
sp|P08603|CFAH_HUMAN	FSCKPGFTIVGPN	Carbamidomethyl(C)@3	cleaved N-S@C-term	1	P08603
sp|P08603|CFAH_HUMAN	YTCEGGFR	Carbamidomethyl(C)@3	cleaved S-Y@N-term	1	P08603
sp|P08603|CFAH_HUMAN	ALNPLRK		cleaved V-A@N-term; missed R-K@6	1	P08603
sp|P08603|CFAH_HUMAN	DGWSPAVPCLR	Carbamidomethyl(C)@9	cleaved Q-D@N-term	1	P08603
sp|P08603|CFAH_HUMAN	CRGKEGWIHTVCINGR	Carbamidomethyl(C)@1; Arg->GluSA(R)@2; Delta:H(2)C(2)(K)@4; Carbamidomethyl(C)@12	missed R-G@2; missed K-E@4	1	P08603
sp|P08603|CFAH_HUMAN	PVFMNAR		cleaved I-P@N-term	1	P08603
sp|P08603|CFAH_HUMAN	ENMRRPYFPVAVGK		cleaved H-E@N-term; missed R-R@4	2	P08603, Q02985
sp|P08603|CFAH_HUMAN	PENGKIVSSAMEPDREYHFGQAVR		cleaved A-P@N-term; missed K-I@5; missed R-E@15	1	P08603
sp|P08603|CFAH_HUMAN	DIKHGGLYHENMR	Carbamyl@N-term	cleaved P-D@N-term; missed K-H@3	2	P08603, Q02985
sp|P08603|CFAH_HUMAN	CTLKPCDYPDIKHGGLYHENMR	Carbamidomethyl(C)@1; Carbamidomethyl(C)@6; Deoxy(D)@7	missed K-H@12	1	P08603
sp|P08603|CFAH_HUMAN	PICEVVKCLPVTAPENGKIVSSAMEPDREYHFGQAVR	Carbamidomethyl(C)@3; Carbamidomethyl(C)@8	cleaved I-P@N-term; missed K-C@7; missed K-I@18; missed R-E@28	1	P08603
sp|P08603|CFAH_HUMAN	QLPQCVAIDKLKKCKSSNLIILEEHLK	Carbamidomethyl(C)@5; Carbamidomethyl(C)@14	cleaved T-Q@N-term; missed K-L@10; missed K-K@12; missed K-C@13; missed K-S@15	1	P08603
sp|P08603|CFAH_HUMAN	RDTSCVNPPTVQNAYIVSR	Dioxidation(R)@1; Carbamidomethyl(C)@5; Deamidated(N)@7	cleaved C-R@N-term; missed R-D@1	1	P08603
sp|P08603|CFAH_HUMAN	KSSNLIILEEHLK	Acetyl@N-term	cleaved C-K@N-term; missed K-S@1	1	P08603
sp|P00747|PLMN_HUMAN	AFQYHSKEQQCVIMAENRK	Carbamidomethyl(C)@11	missed K-E@7; missed R-K@18	2	P00747, Q02325
sp|P00747|PLMN_HUMAN	AGLEKNYCRNPDGDVGGPWCYTTNPR	Carbamidomethyl(C)@8; Carbamidomethyl(C)@20	missed K-N@5; missed R-N@9	1	P00747
sp|P00747|PLMN_HUMAN	APWCHTTNSQVR	Carbamidomethyl(C)@4		1	P00747
sp|P00747|PLMN_HUMAN	ATTVTGTPCQDWAAQEPHR	Carbamidomethyl(C)@9		1	P00747
sp|P00747|PLMN_HUMAN	ATTVTGTPCQDWAAQEPHRHSIFTPETNPR	Carbamidomethyl(C)@9	missed R-H@19	1	P00747
sp|P00747|PLMN_HUMAN	CEEDEEFTCR	Carbamidomethyl(C)@1; Carbamidomethyl(C)@9		1	P00747
sp|P00747|PLMN_HUMAN	CQSWSSMTPHR	Carbamidomethyl(C)@1; Deamidated(Q)@2; Dehydrated(S)@3; Oxidation(M)@7		2	P00747, P08519
sp|P00747|PLMN_HUMAN	CQSWSSMTPHRHQK	Carbamidomethyl(C)@1; Deamidated(Q)@2; Dehydrated(S)@3	missed R-H@11	1	P00747
sp|P00747|PLMN_HUMAN	CSGTEASVVAPPPVVLLPDVETPSEEDCMFGNGK	Carbamidomethyl(C)@1; Carbamidomethyl(C)@28		1	P00747
sp|P00747|PLMN_HUMAN	CSGTEASVVAPPPVVLLPDVETPSEEDCMFGNGKGYR	Carbamidomethyl(C)@1; Carbamidomethyl(C)@28	missed K-G@34	1	P00747
sp|P00747|PLMN_HUMAN	CTTPPPSSGPTYQCLK	Carbamidomethyl(C)@1; Carbamidomethyl(C)@14		1	P00747
sp|P00747|PLMN_HUMAN	DADKGPWCFTTDPSVR	Carbamidomethyl(C)@8	cleaved P-D@N-term; missed K-G@4	1	P00747
sp|P00747|PLMN_HUMAN	DGDVGGPWCYTTNPR	Carbamidomethyl(C)@9; Deamidated(N)@13	cleaved P-D@N-term	1	P00747
sp|P00747|PLMN_HUMAN	DGDVGGPWCYTTNPRK	Carbamidomethyl(C)@9	cleaved P-D@N-term; missed R-K@15	1	P00747
sp|P00747|PLMN_HUMAN	DIALLK	Carbamidomethyl@N-term		38	Q6UXH9, P08217, Q8IYY4, P08218, Q5VT06, P08519, Q8IWQ3, E5RG02, O00187, Q4UJ75, P35998, Q8IWF2, P00749, Q86UE4, P09093, P00747, Q7Z2X7, P83110, P06681, P08861, Q6ZUS5, P03951, Q7RTY5, P03952, P78316, O43149, P35900, Q68DA7, P00738, Q9BZJ3, nQ99895, Q9HCM2, Q7RTZ1, P83105, Q14520, P00751, Q9ULV5, Q92743
sp|P00747|PLMN_HUMAN	DVVLFEK			3	P00747, Q02325, Q15195
sp|P00747|PLMN_HUMAN	DYVNTQGASLFSVTKK		cleaved D-D@N-term; missed K-K@15	1	P00747
sp|P00747|PLMN_HUMAN	EAQLPVIENK			1	P00747
sp|P00747|PLMN_HUMAN	EAQLPVIENKVCNR	Carbamidomethyl(C)@12	missed K-V@10	1	P00747
sp|P00747|PLMN_HUMAN	EAQLPVIENKVCNRYEFLNGR	Carbamidomethyl(C)@12	missed K-V@10; missed R-Y@14	1	P00747
sp|P00747|PLMN_HUMAN	ELRPWCFTTDPNKR	Carbamidomethyl(C)@6	missed K-R@13	1	P00747
sp|P00747|PLMN_HUMAN	ENYPNAGLTMNYCR	Carbamidomethyl(C)@13	cleaved P-E@N-term	1	P00747
sp|P00747|PLMN_HUMAN	EPLDDYVNTQGASLFSVTK		cleaved G-E@N-term	1	P00747
sp|P00747|PLMN_HUMAN	EPLDDYVNTQGASLFSVTKK		cleaved G-E@N-term; missed K-K@19	1	P00747
sp|P00747|PLMN_HUMAN	EQQCVIMAENR	Carbamidomethyl(C)@4		2	P00747, Q02325
sp|P00747|PLMN_HUMAN	EQQCVIMAENRK	Glu->pyro-Glu@N-term; Carbamidomethyl(C)@4	missed R-K@11	2	P00747, Q02325
sp|P00747|PLMN_HUMAN	FSPATHPSEGLEENYCR	Carbamidomethyl(C)@16		1	P00747
sp|P00747|PLMN_HUMAN	FSPATHPSEGLEENYCRNPDND	Carbamidomethyl(C)@16	cleaved D-P@C-term; missed R-N@17	1	P00747
sp|P00747|PLMN_HUMAN	FSPATHPSEGLEENYCRNPDNDPQGPWCYTTDPEK	Carbamidomethyl(C)@16; Deamidated(N)@21; Carbamidomethyl(C)@28	missed R-N@17	1	P00747
sp|P00747|PLMN_HUMAN	FSPATHPSEGLEENYCRNPDNDPQGPWCYTTDPEKR	Carbamidomethyl(C)@16; Deamidated(N)@21; Carbamidomethyl(C)@28	missed R-N@17; missed K-R@35	1	P00747
sp|P00747|PLMN_HUMAN	FVTWIEGVMR	Dioxidation(W)@4		1	P00747
sp|P00747|PLMN_HUMAN	GDVGGPWCYTTNPR	Carbamidomethyl(C)@8	cleaved D-G@N-term	1	P00747
sp|P00747|PLMN_HUMAN	GEPLDDYVNTQGASLFSVTKK	Dehydrated(E)@2	cleaved Q-G@N-term; missed K-K@20	1	P00747
sp|P00747|PLMN_HUMAN	GQGEPLDDYVNTQGASLFSVTKK	Deamidated(Q)@2	cleaved S-G@N-term; missed K-K@22	1	P00747
sp|P00747|PLMN_HUMAN	HQKTPENYPNAGLTMNYCR	Carbamidomethyl(C)@18	missed K-T@3	1	P00747
sp|P00747|PLMN_HUMAN	HSIFTPETNPR			1	P00747
sp|P00747|PLMN_HUMAN	KCQSWSSMTPHR	Carbamidomethyl(C)@2	missed K-C@1	1	P00747
sp|P00747|PLMN_HUMAN	KCSGTEASVVAPPPVVLLPDVETPSEEDCMFGNGK	Carbamidomethyl(C)@2; Carbamidomethyl(C)@29	missed K-C@1	1	P00747
sp|P00747|PLMN_HUMAN	KCSGTEASVVAPPPVVLLPDVETPSEEDCMFGNGKGYR	Carbamidomethyl(C)@2; Carbamidomethyl(C)@29	missed K-C@1; missed K-G@35	1	P00747
sp|P00747|PLMN_HUMAN	KLYDYCDVPQCAAPSFDCGKPQVEPK	Carbamidomethyl(C)@6; Carbamidomethyl(C)@11; Carbamidomethyl(C)@18	missed K-L@1	1	P00747
sp|P00747|PLMN_HUMAN	KLYDYCDVPQCAAPSFDCGKPQVEPKK	Carbamidomethyl(C)@6; Carbamidomethyl(C)@11; Carbamidomethyl(C)@18	missed K-L@1; missed K-K@26	1	P00747
sp|P00747|PLMN_HUMAN	KQLGAGSIEECAAK	Carbamidomethyl(C)@11	missed K-Q@1	1	P00747
sp|P00747|PLMN_HUMAN	KQLGAGSIEECAAKCEEDEEFTCR	Carbamidomethyl(C)@11; Carbamidomethyl(C)@15; Carbamidomethyl(C)@23	missed K-Q@1; missed K-C@14	1	P00747
sp|P00747|PLMN_HUMAN	LDDYVNTQGASLFSVTK		cleaved P-L@N-term	1	P00747
sp|P00747|PLMN_HUMAN	LDDYVNTQGASLFSVTKK		cleaved P-L@N-term; missed K-K@17	1	P00747
sp|P00747|PLMN_HUMAN	LFLEPTR			1	P00747
sp|P00747|PLMN_HUMAN	LFLEPTRK		missed R-K@7	1	P00747
sp|P00747|PLMN_HUMAN	LFLEPTRKDIALLK		missed R-K@7; missed K-D@8	1	P00747
sp|P00747|PLMN_HUMAN	LSSPAVITDK			1	P00747
sp|P00747|PLMN_HUMAN	LSSPAVITDKVIPACLPSPNYVVADR	Carbamidomethyl(C)@15	missed K-V@10	1	P00747
sp|P00747|PLMN_HUMAN	LYDYCDVPQCAAPSFDCGKPQVEPK	Carbamidomethyl(C)@5; Carbamidomethyl(C)@10; Carbamidomethyl(C)@17		1	P00747
sp|P00747|PLMN_HUMAN	MRDVVLFEK		missed R-D@2	3	P00747, Q02325, Q15195
sp|P00747|PLMN_HUMAN	MRDVVLFEKK		missed R-D@2; missed K-K@9	1	P00747
sp|P00747|PLMN_HUMAN	NLDENYCR	Carbamidomethyl(C)@7		1	P00747
sp|P00747|PLMN_HUMAN	NLDENYCRNPDGK	Carbamidomethyl(C)@7	missed R-N@8	1	P00747
sp|P00747|PLMN_HUMAN	NPDADKGPWCFTTDPSVR	Carbamidomethyl(C)@10	missed K-G@6	1	P00747
sp|P00747|PLMN_HUMAN	NPDGDVGGPWCYTTNPR	Carbamidomethyl(C)@11		1	P00747
sp|P00747|PLMN_HUMAN	NPDGDVGGPWCYTTNPRK	Carbamidomethyl(C)@11	missed R-K@17	1	P00747
sp|P00747|PLMN_HUMAN	NPDNDPQGPWCYTTDPEKR	Carbamidomethyl(C)@11	missed K-R@18	1	P00747
sp|P00747|PLMN_HUMAN	NPDRELRPWCFTTDPNKR	Carbamidomethyl(C)@10	missed R-E@4; missed K-R@17	1	P00747
sp|P00747|PLMN_HUMAN	NYCRNPDGDVGGP	Carbamidomethyl(C)@3	cleaved P-W@C-term; missed R-N@4	1	P00747
sp|P00747|PLMN_HUMAN	NYCRNPDGDVGGPWCYTTNPR	Carbamidomethyl(C)@3; Carbamidomethyl(C)@15	missed R-N@4	1	P00747
sp|P00747|PLMN_HUMAN	NYCRNPDGDVGGPWCYTTNPRK	Carbamidomethyl(C)@3; Carbamidomethyl(C)@15	missed R-N@4; missed R-K@21	1	P00747
sp|P00747|PLMN_HUMAN	PCQDWAAQEPHRHSIFTPETNPR	Carbamidomethyl(C)@2	cleaved T-P@N-term; missed R-H@12	1	P00747
sp|P00747|PLMN_HUMAN	PDADKGPWCFTTDPSVR	Carbamidomethyl(C)@9	cleaved N-P@N-term; missed K-G@5	1	P00747
sp|P00747|PLMN_HUMAN	PDGDVGGPWCYTTNPR	Carbamidomethyl(C)@10	cleaved N-P@N-term	1	P00747
sp|P00747|PLMN_HUMAN	PQGPWCYTTDPEKR	Carbamidomethyl(C)@6	cleaved D-P@N-term; missed K-R@13	1	P00747
sp|P00747|PLMN_HUMAN	QLGAGSIEECAAK	Gln->pyro-Glu@N-term; Carbamidomethyl(C)@10		1	P00747
sp|P00747|PLMN_HUMAN	QLGAGSIEECAAKCEEDEEFTCR	Carbamidomethyl(C)@10; Carbamidomethyl(C)@14; Carbamidomethyl(C)@22	missed K-C@13	1	P00747
sp|P00747|PLMN_HUMAN	RAPWCHTTNSQVR	Carbamidomethyl(C)@5	missed R-A@1	1	P00747
sp|P00747|PLMN_HUMAN	RATTVTGTPCQDWAAQEPHR	Carbamidomethyl(C)@10	missed R-A@1	1	P00747
sp|P00747|PLMN_HUMAN	RATTVTGTPCQDWAAQEPHRHSIFTPETNPR	Carbamidomethyl(C)@10	missed R-A@1; missed R-H@20	1	P00747
sp|P00747|PLMN_HUMAN	RWELCDIPR	Carbamidomethyl(C)@5	missed R-W@1	1	P00747
sp|P00747|PLMN_HUMAN	RYDYCDILECEEECMHCSGENYDGKISK	Carbamidomethyl(C)@5; Carbamidomethyl(C)@10; Carbamidomethyl(C)@14; Carbamidomethyl(C)@17	missed R-Y@1; missed K-I@25	1	P00747
sp|P00747|PLMN_HUMAN	SGLECQAWDSQSPHAHGYIPSKFPNKNLKK	Carbamidomethyl(C)@5; Dioxidation(W)@8; HexNAc(S)@12	cleaved M-S@N-term; missed K-F@22; missed K-N@26; missed K-K@29	1	P00747
sp|P00747|PLMN_HUMAN	SGQGEPLDDYVNTQGASLFSVTKK	Carbamyl@N-term; Carbamidomethyl(E)@5	missed K-K@23	1	P00747
sp|P00747|PLMN_HUMAN	SPRPSSYKVILGAHQEVNLEPHVQEIEVSR		missed K-V@8	1	P00747
sp|P00747|PLMN_HUMAN	TKKQLGAGSIEECAAKCEEDEEFTCR	Carbamidomethyl(C)@13; Carbamidomethyl(C)@17; Carbamidomethyl(C)@25	cleaved V-T@N-term; missed K-K@2; missed K-Q@3; missed K-C@16	1	P00747
sp|P00747|PLMN_HUMAN	TMSGLECQAWDSQSPHAHGYIPSK	Carbamidomethyl(C)@7; Deamidated(Q)@8		1	P00747
sp|P00747|PLMN_HUMAN	TMSGLECQAWDSQSPHAHGYIPSKFPNK	Carbamidomethyl(C)@7	missed K-F@24	1	P00747
sp|P00747|PLMN_HUMAN	TMSGLECQAWDSQSPHAHGYIPSKFPNKNLK	Carbamidomethyl(C)@7	missed K-F@24; missed K-N@28	1	P00747
sp|P00747|PLMN_HUMAN	TMSGLECQAWDSQSPHAHGYIPSKFPNKNLKK	Carbamidomethyl(C)@7	missed K-F@24; missed K-N@28; missed K-K@31	1	P00747
sp|P00747|PLMN_HUMAN	TPENFPCK	Carbamidomethyl(C)@7		1	P00747
sp|P00747|PLMN_HUMAN	TPENFPCKNLDENYCR	Carbamidomethyl(C)@7; Lys->Allysine(K)@8; Carbamidomethyl(C)@15	missed K-N@8	1	P00747
sp|P00747|PLMN_HUMAN	TPENFPCKNLDENYCRNPDGK	Carbamidomethyl(C)@7; Carbamidomethyl(C)@15	missed K-N@8; missed R-N@16	1	P00747
sp|P00747|PLMN_HUMAN	TPENFPCKNLDENYCRNPDGKR	Deamidated(N)@4; Carbamidomethyl(C)@7; Carbamidomethyl(C)@15	missed K-N@8; missed R-N@16; missed K-R@21	1	P00747
sp|P00747|PLMN_HUMAN	TPENYPNAGLTMNYCR	Carbamidomethyl(C)@15		1	P00747
sp|P00747|PLMN_HUMAN	TPENYPNAGLTMNYCRNPDADKGPWCFTTDPSVR	Carbamidomethyl(C)@15; Carbamidomethyl(K)@22; Carbamidomethyl(C)@26	missed R-N@16; missed K-G@22	1	P00747
sp|P00747|PLMN_HUMAN	VCNRYEFLNGR	Carbamidomethyl(C)@2	missed R-Y@4	1	P00747
sp|P00747|PLMN_HUMAN	VILGAHQEVNLEPHVQEIEVSR			1	P00747
sp|P00747|PLMN_HUMAN	VIPACLPSPNYVVADR	Carbamidomethyl(C)@5		1	P00747
sp|P00747|PLMN_HUMAN	VQSTELCAGHLAGGTDSCQGDSGGPLVCFEK	Carbamidomethyl(C)@7; Carbamidomethyl(C)@18; Carbamidomethyl(C)@28		1	P00747
sp|P00747|PLMN_HUMAN	VQSTELCAGHLAGGTDSCQGDSGGPLVCFEKDK	Carbamidomethyl(C)@7; Carbamidomethyl(C)@18; Carbamidomethyl(C)@28	missed K-D@31	1	P00747
sp|P00747|PLMN_HUMAN	VVGGCVAHPHSWPWQVSLR	Carbamidomethyl(C)@5		1	P00747
sp|P00747|PLMN_HUMAN	WELCDIPR	Oxidation(W)@1; Carbamidomethyl(C)@4		1	P00747
sp|P00747|PLMN_HUMAN	WEYCNLK	Carbamidomethyl(C)@4		1	P00747
sp|P00747|PLMN_HUMAN	WEYCNLKK	Carbamidomethyl(C)@4	missed K-K@7	1	P00747
sp|P00747|PLMN_HUMAN	WVLTAAH		cleaved E-W@N-term; cleaved H-C@C-term	51	P57727, P49862, P08519, Q6ZR98, O00187, Q86WS5, Q9NRS4, P00747, P00748, P20231, Q9GZN4, Q15661, O43240, P03952, P10323, P12544, A6NIE9, O60259, Q9P0G3, P00734, Q7RTZ1, P06870, P07288, P05981, P0CW18, Q9UKR3, Q9UKR0, E7EML9, P08217, P51124, nP08218, Q9BQR3, P56730, E5RG02, Q8NF86, Q9BYE2, P06681, P09871, Q8IU80, Q92876, P20151, P48740, Q8IYP2, Q9UNI1, Q9NRR2, Q2L4Q9, Q9BZJ3, P04070, A0A1B0, P49863…
sp|P00747|PLMN_HUMAN	YCRNPDNDPQGPWCYTTDPEKR	Carbamidomethyl(C)@2; Carbamidomethyl(C)@14	cleaved N-Y@N-term; missed R-N@3; missed K-R@21	1	P00747
sp|P00747|PLMN_HUMAN	YDYCDILECEEECMHCSGENYDGK	Carbamidomethyl(C)@4; Carbamidomethyl(C)@9; Carbamidomethyl(C)@13; Carbamidomethyl(C)@16		1	P00747
sp|P00747|PLMN_HUMAN	YDYCDILECEEECMHCSGENYDGKISK	Carbamidomethyl(C)@4; Carbamidomethyl(C)@9; Carbamidomethyl(C)@13; Carbamidomethyl(C)@16	missed K-I@24	1	P00747
sp|P00747|PLMN_HUMAN	YEFLNGR			1	P00747
sp|P00747|PLMN_HUMAN	PCQDWAAQEPHR	Carbamidomethyl(C)@2	cleaved T-P@N-term	1	P00747
sp|P00747|PLMN_HUMAN	NPDNDPQGPWCYTTDPEK	Carbamidomethyl(C)@11		1	P00747
sp|P00747|PLMN_HUMAN	ELRPWCFTTDPNK	Carbamidomethyl(C)@6		1	P00747
sp|P00747|PLMN_HUMAN	VYLSECK	Carbamidomethyl(C)@6		1	P00747
sp|P00747|PLMN_HUMAN	SIFTPETNPR		cleaved H-S@N-term	1	P00747
sp|P00747|PLMN_HUMAN	AFQYHSKEQQCVIMAENR	Carbamidomethyl(C)@11	missed K-E@7	2	P00747, Q02325
sp|P00747|PLMN_HUMAN	HSIFTPETN		cleaved N-P@C-term	1	P00747
sp|P00747|PLMN_HUMAN	WSSTSPHRPR			1	P00747
sp|P00747|PLMN_HUMAN	DRELRPWCFTTDPNKR	Carbamidomethyl(C)@8	cleaved P-D@N-term; missed R-E@2; missed K-R@15	1	P00747
sp|P00747|PLMN_HUMAN	QGEPLDDYVNTQGASLFSVTKK		cleaved G-Q@N-term; missed K-K@21	1	P00747
sp|P00747|PLMN_HUMAN	WCYTTNPR	Carbamidomethyl(C)@2	cleaved P-W@N-term	1	P00747
sp|P00747|PLMN_HUMAN	TTVTGTPCQDWAAQEPHR	Carbamidomethyl(C)@8	cleaved A-T@N-term	1	P00747
sp|P00747|PLMN_HUMAN	WCFTTDPNKRWELCDIPRCTTPPPSSGPTYQCLK	Carbamidomethyl(C)@2; Carbamidomethyl(C)@14; Carbamidomethyl(C)@19; Carbamidomethyl(C)@32	cleaved P-W@N-term; missed K-R@9; missed R-W@10; missed R-C@18	1	P00747
sp|P00747|PLMN_HUMAN	EPLDDYVNTQGASLFSVTKKQLGAGSIEECAAK	Carbamidomethyl(C)@30	cleaved G-E@N-term; missed K-K@19; missed K-Q@20	1	P00747
sp|P00747|PLMN_HUMAN	AGLEKNYCRNPDGDVGGP	Carbamidomethyl(C)@8	cleaved P-W@C-term; missed K-N@5; missed R-N@9	1	P00747
sp|P00747|PLMN_HUMAN	CTTPPPSSGPTYQCLKGTGENYR	Carbamidomethyl(C)@1; Carbamidomethyl(C)@14	missed K-G@16	1	P00747
sp|P00747|PLMN_HUMAN	HQKTPENYPNAGLTMNYCRNPDADKGPWCFTTDPSVR	Carbamidomethyl(C)@18; Carbamidomethyl(C)@29	missed K-T@3; missed R-N@19; missed K-G@25	1	P00747
sp|P00747|PLMN_HUMAN	YCNLKK	Carbamidomethyl(C)@2	cleaved E-Y@N-term; missed K-K@5	2	P00747, Q7Z7A4
sp|P00747|PLMN_HUMAN	VYLSECKTGNGKNYR	Carbamidomethyl(C)@6; Deamidated(N)@10	missed K-T@7; missed K-N@12	1	P00747
sp|P00747|PLMN_HUMAN	EYCNLKK	Carbamidomethyl(C)@3	cleaved W-E@N-term; missed K-K@6	1	P00747
sp|P00747|PLMN_HUMAN	GYRGKRATTVTGTPCQDWAAQEPHR	Carbamidomethyl(C)@15	missed R-G@3; missed K-R@5; missed R-A@6	1	P00747
sp|P00747|PLMN_HUMAN	FLKSGQGEPLDDYVNTQGASLFSVTKK	Deamidated(Q)@6; Oxidation(P)@9	cleaved L-F@N-term; missed K-S@3; missed K-K@26	1	P00747
sp|P00747|PLMN_HUMAN	FLEPTRK		cleaved L-F@N-term; missed R-K@6	1	P00747
sp|P00747|PLMN_HUMAN	YVNTQGASLFSVTKK		cleaved D-Y@N-term; missed K-K@14	1	P00747
sp|P00747|PLMN_HUMAN	SGQGEPLDDYVNTQGASLFSVTK			1	P00747
sp|P00747|PLMN_HUMAN	TDPSVRWEYCNLKKCSGTEASVVAPPPVVLLPDVETPSEEDCMFGNGK	Carbamidomethyl(C)@10; Carbamidomethyl(C)@15; Carbamidomethyl(C)@42	cleaved T-T@N-term; missed R-W@6; missed K-K@13; missed K-C@14	1	P00747
sp|P00747|PLMN_HUMAN	PETNPR		cleaved T-P@N-term	3	P00747, Q96NY9, Q9H3S1
sp|P00747|PLMN_HUMAN	TVTGTPCQDWAAQEPHR	Carbamidomethyl(C)@7	cleaved T-T@N-term	1	P00747
sp|P00747|PLMN_HUMAN	PPPVVLLPDVETPSEEDCMFGNGKGYR	Carbamidomethyl(C)@18	cleaved A-P@N-term; missed K-G@24	1	P00747
sp|P00747|PLMN_HUMAN	NPDGKRAPWCHTTNSQVR	Carbamidomethyl(C)@10	missed K-R@5; missed R-A@6	1	P00747
sp|P00747|PLMN_HUMAN	PQCAAPSFDCGKPQVEPKKCPG	Carbamidomethyl(C)@3; Carbamidomethyl(C)@10; Carbamidomethyl(C)@20	cleaved V-P@N-term; cleaved G-R@C-term; missed K-K@18; missed K-C@19	1	P00747
sp|P00747|PLMN_HUMAN	RCTTPPPSSGPTYQCLK	Carbamidomethyl(C)@2; Carbamidomethyl(C)@15	cleaved P-R@N-term; missed R-C@1	1	P00747
sp|P00747|PLMN_HUMAN	ILGAHQEVNLE		cleaved V-I@N-term; cleaved E-P@C-term	2	P00747, P08519
sp|P00747|PLMN_HUMAN	IPSCDSSPVSTEQLAPTAPPELTPVVQDCYHGDGQSYR	Carbamidomethyl(C)@4; Hex(1)HexNAc(1)NeuAc(1)(T)@17; Carbamidomethyl(C)@29		1	P00747
sp|P00747|PLMN_HUMAN	CSGTEASVVAPPPVVLLPDVETPSEEDCMFGNGKG	Carbamidomethyl(C)@1; Carbamidomethyl(C)@28	cleaved G-Y@C-term; missed K-G@34	1	P00747
sp|P00747|PLMN_HUMAN	EHKEVVLLLLLFLKSGQGEPLDDYVNTQGASLFSVTKK	GlnGlnGlnThrGlyGly(K)@14; Cation:K(E)@19	cleaved M-E@N-term; missed K-E@3; missed K-S@14; missed K-K@37	1	P00747
sp|P00747|PLMN_HUMAN	GYRGKRATTVTGTPCQDWAAQEPHRHSIFTPETNPR	Dehydrated(T)@13; Carbamidomethyl(C)@15; Deamidated(Q)@16	missed R-G@3; missed K-R@5; missed R-A@6; missed R-H@25	1	P00747
sp|P00747|PLMN_HUMAN	PGRVVGG		cleaved C-P@N-term; cleaved G-C@C-term; missed R-V@3	1	P00747
sp|P00747|PLMN_HUMAN	PNKRWELCDIPRCTTPPPSSGPTYQCLK	Bromo(W)@5; Carbamidomethyl(C)@8; Carbamidomethyl(C)@13; Carbamidomethyl(C)@26	cleaved D-P@N-term; missed K-R@3; missed R-W@4; missed R-C@12	1	P00747
sp|P00747|PLMN_HUMAN	PRFSPATHPSEGLEENYCRNPDNDPQGPWCYTTDPEKR	Carbamyl@N-term; Deamidated(N)@16; Carbamidomethyl(C)@18; Deamidated(N)@20; Deamidated(N)@23; Carbamidomethyl(C)@30	cleaved R-P@N-term; missed R-F@2; missed R-N@19; missed K-R@37	1	P00747
sp|P02790|HEMO_HUMAN	AHGNVAEGETKPDPDVTER		cleaved S-A@N-term	1	P02790
sp|P02790|HEMO_HUMAN	AKALPQPQNVTSLLGCTH	Oxidation(P)@5; Carbamidomethyl(C)@16	cleaved A-A@N-term; missed K-A@2	1	P02790
sp|P02790|HEMO_HUMAN	ALPQPQNVTSLLGCTH	Carbamidomethyl(C)@14		1	P02790
sp|P02790|HEMO_HUMAN	CFQGNQFLR	Carbamidomethyl(C)@1	cleaved Y-C@N-term	1	P02790
sp|P02790|HEMO_HUMAN	CSPHLVLSALTSDN	Carbamidomethyl(C)@1	cleaved N-H@C-term	1	P02790
sp|P02790|HEMO_HUMAN	DEFPGIPSPLDAAVECHR	Carbamidomethyl(C)@16	cleaved Q-D@N-term	1	P02790
sp|P02790|HEMO_HUMAN	DKVWVYPPEKK		cleaved G-D@N-term; missed K-V@2; missed K-K@10	1	P02790
sp|P02790|HEMO_HUMAN	DRELISERWKNFPSPVDAAFR	Oxidation(W)@9; Deamidated(N)@11	cleaved W-D@N-term; missed R-E@2; missed R-W@8; missed K-N@10	1	P02790
sp|P02790|HEMO_HUMAN	DVRDYFMPCPGR	Carbamidomethyl(C)@9	missed R-D@3	1	P02790
sp|P02790|HEMO_HUMAN	DYFMPCPGR	Carbamidomethyl(C)@6		1	P02790
sp|P02790|HEMO_HUMAN	DYFMPCPGRGHGHR	Carbamidomethyl(C)@6	missed R-G@9	1	P02790
sp|P02790|HEMO_HUMAN	EFVWKSHKWDRELISERWKNFPSPVDAAFR		cleaved G-E@N-term; missed K-S@5; missed K-W@8; missed R-E@11; missed R-W@17; missed K-N@19	1	P02790
sp|P02790|HEMO_HUMAN	EKSLGPNSCSANGPGLYLIHGPNLYCYSDVEKLNAAK	Carbamidomethyl(C)@9; Carbamidomethyl(C)@26	cleaved M-E@N-term; missed K-S@2; missed K-L@32	1	P02790
sp|P02790|HEMO_HUMAN	ELISER			16	Q6V1X1, Q969G3, P02790, O95714, Q13118, Q9H0J4, O75056, Q562F6, Q5SQS7, Q7Z6L0, Q9NU22, Q9NS69, Q8WZ60, Q96T23, Q3SYG4, Q86VF7
sp|P02790|HEMO_HUMAN	ELISERWKNFPSPVDAAFR	Retinylidene(K)@8	missed R-W@6; missed K-N@8	1	P02790
sp|P02790|HEMO_HUMAN	ERSWPAVGNCSSALR	Deamidated(R)@2; Dioxidation(W)@4; Carbamidomethyl(C)@10	missed R-S@2	1	P02790
sp|P02790|HEMO_HUMAN	ERWKNFPSPVDAAFR		cleaved S-E@N-term; missed R-W@2; missed K-N@4	1	P02790
sp|P02790|HEMO_HUMAN	EVGTPHGIILDSVDAAFICPGSSR	Carbamidomethyl(C)@19		1	P02790
sp|P02790|HEMO_HUMAN	FDPVRGEVPPR		missed R-G@5	1	P02790
sp|P02790|HEMO_HUMAN	FDPVRGEVPPRYPR		missed R-G@5; missed R-Y@11	1	P02790
sp|P02790|HEMO_HUMAN	FPSPVDAAFR		cleaved N-F@N-term	1	P02790
sp|P02790|HEMO_HUMAN	FQGNQFLR		cleaved C-F@N-term	1	P02790
sp|P02790|HEMO_HUMAN	GDKVWVYPPEK		missed K-V@3	1	P02790
sp|P02790|HEMO_HUMAN	GDKVWVYPPEKK		missed K-V@3; missed K-K@11	1	P02790
sp|P02790|HEMO_HUMAN	GDKVWVYPPEKKEK		missed K-V@3; missed K-K@11; missed K-E@12	1	P02790
sp|P02790|HEMO_HUMAN	GEFVWK			1	P02790
sp|P02790|HEMO_HUMAN	GEFVWKSHKWDRELISERWKNFPSPVDAAFR	Carbamyl(K)@9; Trp->Hydroxykynurenin(W)@10	missed K-S@6; missed K-W@9; missed R-E@12; missed R-W@18; missed K-N@20	1	P02790
sp|P02790|HEMO_HUMAN	GGYTLVSGYPK			1	P02790
sp|P02790|HEMO_HUMAN	GNVAEGETKPDPDVTER		cleaved H-G@N-term	1	P02790
sp|P02790|HEMO_HUMAN	GPNSCSANGPGLYLIHGPNLYCYSDVEKLNAAK	Carbamidomethyl(C)@5; HexNAc(N)@8; Carbamidomethyl(C)@22	cleaved L-G@N-term; missed K-L@28	1	P02790
sp|P02790|HEMO_HUMAN	GYTLVSGYPK		cleaved G-G@N-term	1	P02790
sp|P02790|HEMO_HUMAN	HGNVAEGETKPDPDVTER		cleaved A-H@N-term	1	P02790
sp|P02790|HEMO_HUMAN	HGPNLYCYSDVEKLNAAK	Carbamidomethyl(C)@7	cleaved I-H@N-term; missed K-L@13	1	P02790
sp|P02790|HEMO_HUMAN	HNSVFLIK		cleaved G-H@N-term	1	P02790
sp|P02790|HEMO_HUMAN	ISERWKNFPSPVDAAFR	Nitro(W)@5	cleaved L-I@N-term; missed R-W@4; missed K-N@6	1	P02790
sp|P02790|HEMO_HUMAN	KNFPSPVDAAFR		cleaved W-K@N-term; missed K-N@1	1	P02790
sp|P02790|HEMO_HUMAN	LEKEVGTPHGIILDSVDAAFICPGSSR	Carbamidomethyl(C)@22	missed K-E@3	1	P02790
sp|P02790|HEMO_HUMAN	LGRYYCFQGNQFLR	Carbamidomethyl(C)@6	cleaved W-L@N-term; missed R-Y@3	1	P02790
sp|P02790|HEMO_HUMAN	LHIMAGR	Carbamyl@N-term		2	P02790, Q5T013
sp|P02790|HEMO_HUMAN	LLQDEFPGIPSPLD		cleaved D-A@C-term	1	P02790
sp|P02790|HEMO_HUMAN	LLQDEFPGIPSPLDAAVECH	Carbamidomethyl(C)@19	cleaved H-R@C-term	1	P02790
sp|P02790|HEMO_HUMAN	LLQDEFPGIPSPLDAAVECHR	Carbamidomethyl(C)@19		1	P02790
sp|P02790|HEMO_HUMAN	LLQDEFPGIPSPLDAAVECHRG	Carbamidomethyl(C)@19	cleaved G-E@C-term; missed R-G@21	1	P02790
sp|P02790|HEMO_HUMAN	LPPTSAHGNVAEGETKPD		cleaved P-L@N-term; cleaved D-P@C-term	1	P02790
sp|P02790|HEMO_HUMAN	LPPTSAHGNVAEGETKPDPDVTER		cleaved P-L@N-term	1	P02790
sp|P02790|HEMO_HUMAN	NFPSPVDAAFR			1	P02790
sp|P02790|HEMO_HUMAN	NFPSPVDAAFRQG		cleaved G-H@C-term; missed R-Q@11	1	P02790
sp|P02790|HEMO_HUMAN	NFPSPVDAAFRQGHN		cleaved N-S@C-term; missed R-Q@11	1	P02790
sp|P02790|HEMO_HUMAN	NFPSPVDAAFRQGHNSVFLIK	Deamidated(N)@15	missed R-Q@11	1	P02790
sp|P02790|HEMO_HUMAN	NLYCYSDVEKLNAAK	HexNAc(N)@1; Carbamidomethyl(C)@4	cleaved P-N@N-term; missed K-L@10	1	P02790
sp|P02790|HEMO_HUMAN	NSCSANGPGLYLIHGPNLYCYSDVEKLNAAK	Carbamidomethyl(C)@3; Carbamidomethyl(C)@20	cleaved P-N@N-term; missed K-L@26	1	P02790
sp|P02790|HEMO_HUMAN	NVAEGETKPDPDVTER		cleaved G-N@N-term	1	P02790
sp|P02790|HEMO_HUMAN	PDVTER		cleaved D-P@N-term	4	P02790, O94875, Q15031, Q96EB6
sp|P02790|HEMO_HUMAN	PKLLQDEFPGIPSPLDAAVECHR	Carbamidomethyl(C)@21	cleaved Y-P@N-term; missed K-L@2	1	P02790
sp|P02790|HEMO_HUMAN	PLPPTSAHGNVAEGETKPDPDVTER		cleaved T-P@N-term	1	P02790
sp|P02790|HEMO_HUMAN	PNLYCYSDVEKLNAAK	Carbamidomethyl(C)@5	cleaved G-P@N-term; missed K-L@11	1	P02790
sp|P02790|HEMO_HUMAN	PPTSAHGNVAEGETKPDPDVTER	GlnThrGlyGly(K)@15	cleaved L-P@N-term	1	P02790
sp|P02790|HEMO_HUMAN	PTSAHGNVAEGETKPDPDVTER		cleaved P-P@N-term	1	P02790
sp|P02790|HEMO_HUMAN	PVDAAFR		cleaved S-P@N-term	1	P02790
sp|P02790|HEMO_HUMAN	PVRGEVPPRYPR		cleaved D-P@N-term; missed R-G@3; missed R-Y@9	1	P02790
sp|P02790|HEMO_HUMAN	QGHNSVFLIK	Gln->pyro-Glu@N-term		1	P02790
sp|P02790|HEMO_HUMAN	QGHNSVFLIKG	Gln->pyro-Glu@N-term	cleaved G-D@C-term; missed K-G@10	1	P02790
sp|P02790|HEMO_HUMAN	QGHNSVFLIKGDK	Gln->pyro-Glu@N-term	missed K-G@10	1	P02790
sp|P02790|HEMO_HUMAN	QGHNSVFLIKGDKVWVYPPEK	Gln->pyro-Glu@N-term	missed K-G@10; missed K-V@13	1	P02790
sp|P02790|HEMO_HUMAN	QGHNSVFLIKGDKVWVYPPEKK	Gln->pyro-Glu@N-term	missed K-G@10; missed K-V@13; missed K-K@21	1	P02790
sp|P02790|HEMO_HUMAN	QGHNSVFLIKGDKVWVYPPEKKEK	Gln->pyro-Glu@N-term	missed K-G@10; missed K-V@13; missed K-K@21; missed K-E@22	1	P02790
sp|P02790|HEMO_HUMAN	RELISERWKNFPSPVDAAFR		cleaved D-R@N-term; missed R-E@1; missed R-W@7; missed K-N@9	1	P02790
sp|P02790|HEMO_HUMAN	RLEKEVGTPHGIILDSVDAAFICPGSSR	Carbamidomethyl(C)@23	missed R-L@1; missed K-E@4	1	P02790
sp|P02790|HEMO_HUMAN	RLWWLDLK	Carbamidomethyl@N-term	missed R-L@1	1	P02790
sp|P02790|HEMO_HUMAN	RWKNFPSPVDAAFR	Hex(R)@1	cleaved E-R@N-term; missed R-W@1; missed K-N@3	1	P02790
sp|P02790|HEMO_HUMAN	SAHGNVAEGETKPDPDVTER		cleaved T-S@N-term	1	P02790
sp|P02790|HEMO_HUMAN	SERWKNFPSPVDAAFR		cleaved I-S@N-term; missed R-W@3; missed K-N@5	1	P02790
sp|P02790|HEMO_HUMAN	SGAQATWTELPWPHEK			1	P02790
sp|P02790|HEMO_HUMAN	SGAQATWTELPWPHEKVDGALCMEK	Carbamidomethyl(C)@22	missed K-V@16	1	P02790
sp|P02790|HEMO_HUMAN	SHKWDRELISER		missed K-W@3; missed R-E@6	1	P02790
sp|P02790|HEMO_HUMAN	SHKWDRELISERWKNFPSPVDAAFR		missed K-W@3; missed R-E@6; missed R-W@12; missed K-N@14	1	P02790
sp|P02790|HEMO_HUMAN	SLGPNSCSANGPGLYLIHGP	Carbamidomethyl(C)@7	cleaved P-N@C-term	1	P02790
sp|P02790|HEMO_HUMAN	SLGPNSCSANGPGLYLIHGPNLYCYSDVEK	Carbamidomethyl(C)@7; Carbamidomethyl(C)@24		1	P02790
sp|P02790|HEMO_HUMAN	SLGPNSCSANGPGLYLIHGPNLYCYSDVEKLNAAK	Carbamidomethyl(C)@7; Deamidated(N)@21; Carbamidomethyl(C)@24	missed K-L@30	1	P02790
sp|P02790|HEMO_HUMAN	SPVDAAFR		cleaved P-S@N-term	1	P02790
sp|P02790|HEMO_HUMAN	SVFLIK		cleaved N-S@N-term	4	P30556, P02790, Q9HCD6, Q38SD2
sp|P02790|HEMO_HUMAN	SVFLIKGDK		cleaved N-S@N-term; missed K-G@6	1	P02790
sp|P02790|HEMO_HUMAN	SVFLIKGDKVWVYPPEKK		cleaved N-S@N-term; missed K-G@6; missed K-V@9; missed K-K@17	1	P02790
sp|P02790|HEMO_HUMAN	SWPAVGNCSSALR	Carbamidomethyl(C)@8		1	P02790
sp|P02790|HEMO_HUMAN	TPLPPTSAHGNVAEGETKPD		cleaved A-T@N-term; cleaved D-P@C-term	1	P02790
sp|P02790|HEMO_HUMAN	TPLPPTSAHGNVAEGETKPDPDVTER		cleaved A-T@N-term	1	P02790
sp|P02790|HEMO_HUMAN	TSAHGNVAEGETKPDPDVTER		cleaved P-T@N-term	1	P02790
sp|P02790|HEMO_HUMAN	VAEGETKPDPDVTER		cleaved N-V@N-term	1	P02790
sp|P02790|HEMO_HUMAN	VDGALCMEK	Carbamidomethyl(C)@6		1	P02790
sp|P02790|HEMO_HUMAN	VWVYPPEK			1	P02790
sp|P02790|HEMO_HUMAN	VWVYPPEKK	Dioxidation(W)@2	missed K-K@8	1	P02790
sp|P02790|HEMO_HUMAN	VWVYPPEKKEK		missed K-K@8; missed K-E@9	1	P02790
sp|P02790|HEMO_HUMAN	WDRELISER		missed R-E@3	1	P02790
sp|P02790|HEMO_HUMAN	WDRELISERWKNFPSPVDAAFR	Formyl@N-term	missed R-E@3; missed R-W@9; missed K-N@11	1	P02790
sp|P02790|HEMO_HUMAN	WKNFPSPVD		cleaved D-A@C-term; missed K-N@2	1	P02790
sp|P02790|HEMO_HUMAN	WKNFPSPVDA		cleaved A-A@C-term; missed K-N@2	1	P02790
sp|P02790|HEMO_HUMAN	WKNFPSPVDAAF		cleaved F-R@C-term; missed K-N@2	1	P02790
sp|P02790|HEMO_HUMAN	WKNFPSPVDAAFR		missed K-N@2	1	P02790
sp|P02790|HEMO_HUMAN	WVYPPEKK		cleaved V-W@N-term; missed K-K@7	1	P02790
sp|P02790|HEMO_HUMAN	YCFQGNQFLR	Carbamidomethyl(C)@2	cleaved Y-Y@N-term	1	P02790
sp|P02790|HEMO_HUMAN	YYCFQGNQFLR	Carbamidomethyl(C)@3		1	P02790
sp|P02790|HEMO_HUMAN	LWWLDLK	Dioxidation(W)@3		1	P02790
sp|P02790|HEMO_HUMAN	DVRDYFMPCPGRGHGHR	Carbamidomethyl(C)@9	missed R-D@3; missed R-G@12	1	P02790
sp|P02790|HEMO_HUMAN	GEVPPRYPR		missed R-Y@6	1	P02790
sp|P02790|HEMO_HUMAN	ELISERWK		missed R-W@6	1	P02790
sp|P02790|HEMO_HUMAN	GECQAEGVLFFQGDR	Carbamidomethyl(C)@3		1	P02790
sp|P02790|HEMO_HUMAN	YTLVSGYPKRLEKEVGTPHGIILDSVDAAFICPGSSR	Carbamidomethyl(C)@32	cleaved G-Y@N-term; missed K-R@9; missed R-L@10; missed K-E@13	1	P02790
sp|P02790|HEMO_HUMAN	EGETKPDPDVTER		cleaved A-E@N-term	1	P02790
sp|P02790|HEMO_HUMAN	EWFWDLATGTMKER		missed K-E@12	1	P02790
sp|P02790|HEMO_HUMAN	LLQDEFPGIPSPLDAAVECHRGECQAEGVL	Carbamidomethyl(C)@19; Carbamidomethyl(C)@24	cleaved L-F@C-term; missed R-G@21	1	P02790
sp|P02790|HEMO_HUMAN	VQGTQVYVFLTKGGYTLVSGYPKRLEKEVGTPHGIILDSVDAAFICPGSSR	Carbamidomethyl(C)@46	cleaved L-V@N-term; missed K-G@12; missed K-R@23; missed R-L@24; missed K-E@27	1	P02790
sp|P02790|HEMO_HUMAN	FKGEFVWK		cleaved F-F@N-term; missed K-G@2	1	P02790
sp|P02790|HEMO_HUMAN	WKNFPSPVDAAFRQGHN		cleaved N-S@C-term; missed K-N@2; missed R-Q@13	1	P02790
sp|P02790|HEMO_HUMAN	KGEFVWK	Delta:H(2)C(2)(K)@1	cleaved F-K@N-term; missed K-G@1	1	P02790
sp|P02790|HEMO_HUMAN	PKRLEKEVGTPHGIILDSVDAAFICPGSSR	Carbamidomethyl(C)@25	cleaved Y-P@N-term; missed K-R@2; missed R-L@3; missed K-E@6	1	P02790
sp|P02790|HEMO_HUMAN	WKNFPSPVDAA		cleaved A-F@C-term; missed K-N@2	1	P02790
sp|P02790|HEMO_HUMAN	NLYCYSDVEK	Carbamidomethyl(C)@4	cleaved P-N@N-term	1	P02790
sp|P02790|HEMO_HUMAN	PVRGEVPPR		cleaved D-P@N-term; missed R-G@3	1	P02790
sp|P02790|HEMO_HUMAN	LYCYSDVEK	Carbamidomethyl(C)@3	cleaved N-L@N-term	1	P02790
sp|P02790|HEMO_HUMAN	DVRDYFMPCPGRG	Carbamidomethyl(C)@9	cleaved G-H@C-term; missed R-D@3; missed R-G@12	1	P02790
sp|P02790|HEMO_HUMAN	CSSALRWLGRYYCFQGNQFLR	Carbamidomethyl(C)@1; Dioxidation(W)@7; Carbamidomethyl(C)@13	cleaved N-C@N-term; missed R-W@6; missed R-Y@10	1	P02790
sp|P02790|HEMO_HUMAN	SLGPNSCSANGPGLYLIHGPN	Carbamidomethyl(C)@7	cleaved N-L@C-term	1	P02790
sp|P02790|HEMO_HUMAN	SCSANGPGLYLIHGPNLYCYSDVEKLNAAK	Carbamidomethyl(C)@2; Deamidated(N)@16; Carbamidomethyl(C)@19	cleaved N-S@N-term; missed K-L@25	1	P02790
sp|P02790|HEMO_HUMAN	CSPHLVLSALTSDNH	Carbamidomethyl(C)@1; Ammonia-loss(N)@14	cleaved H-G@C-term	1	P02790
sp|P02790|HEMO_HUMAN	LYCYSDVEKLNAAK	Carbamidomethyl(C)@3	cleaved N-L@N-term; missed K-L@9	1	P02790
sp|P02790|HEMO_HUMAN	DPVRGEVPPRYPR		cleaved F-D@N-term; missed R-G@4; missed R-Y@10	1	P02790
sp|P02790|HEMO_HUMAN	PPTSAHGNVAEGETKPDPDVTE		cleaved L-P@N-term; cleaved E-R@C-term	1	P02790
sp|P02790|HEMO_HUMAN	GETKPDPDVTER		cleaved E-G@N-term	1	P02790
sp|P02790|HEMO_HUMAN	GIILDSVDAAFICPGSSR	Carbamidomethyl(C)@13	cleaved H-G@N-term	1	P02790
sp|P02790|HEMO_HUMAN	YPPEKK		cleaved V-Y@N-term; missed K-K@5	2	P02790, Q9NRM0
sp|P02790|HEMO_HUMAN	LISERWKNFPSPVDAAFR	Trp->Hydroxykynurenin(W)@6	cleaved E-L@N-term; missed R-W@5; missed K-N@7	1	P02790
sp|P02790|HEMO_HUMAN	SGAQATWTELPWPH	Deamidated(Q)@4	cleaved H-E@C-term	1	P02790
sp|P02790|HEMO_HUMAN	GAPVALGLWSLCWSLAIATPLPPTSAHGNVAEGETKPDPDVTER	Carbamidomethyl(C)@12	cleaved L-G@N-term	1	P02790
sp|P02790|HEMO_HUMAN	EKEVGTPHGIILDSVDAAFICPGSSR	Dioxidation(P)@7; Carbamidomethyl(C)@21	cleaved L-E@N-term; missed K-E@2	1	P02790
sp|P02790|HEMO_HUMAN	FMPCPGR	Dethiomethyl(M)@2; Carbamidomethyl(C)@4	cleaved Y-F@N-term	1	P02790
sp|P02790|HEMO_HUMAN	LVSGYPKRLEKEVGTPHGIILDSVDAAFICPGSSR	Formyl@N-term; Carbamidomethyl(C)@30	cleaved T-L@N-term; missed K-R@7; missed R-L@8; missed K-E@11	1	P02790
sp|P02790|HEMO_HUMAN	PPTSAHGNVAEGETKPDPDVTERCSDGWSFD	Oxidation(P)@18; Carbamidomethyl(C)@24	cleaved L-P@N-term; cleaved D-A@C-term; missed R-C@23	1	P02790
sp|P02790|HEMO_HUMAN	VWKSHKWDRELISERWKNFPSPVDAAFR	Arg-add@N-term	cleaved F-V@N-term; missed K-S@3; missed K-W@6; missed R-E@9; missed R-W@15; missed K-N@17	1	P02790
sp|P02790|HEMO_HUMAN	GLWSLCWSLAIATPLPPTSAHGNVAEGETKPDPDVTER	Carbamidomethyl(C)@6	cleaved L-G@N-term	1	P02790
sp|P02790|HEMO_HUMAN	LCWSLAIATPLPPTSAHGNVAEGETKPDPDVTER	Carbamidomethyl(C)@2; Dioxidation(W)@3	cleaved S-L@N-term	1	P02790
sp|P02790|HEMO_HUMAN	LWSLCWSLAIATPLPPTSAHGNVAEGETKPDPDVTER	FormaldehydeAdduct(W)@2; Carbamidomethyl(C)@5	cleaved G-L@N-term	1	P02790
sp|P02790|HEMO_HUMAN	WSLAIATPLPPTSAHGNVAEGETKPDPDVTER	Oxidation(P)@8	cleaved C-W@N-term	1	P02790
sp|P00751|CFAB_HUMAN	AIHCPRPHDFENGEYWPR	Carbamidomethyl(C)@4		1	P00751
sp|P00751|CFAB_HUMAN	ALFVSEEEK			1	P00751
sp|P00751|CFAB_HUMAN	ALFVSEEEKK		missed K-K@9	1	P00751
sp|P00751|CFAB_HUMAN	ALFVSEEEKKLTR		missed K-K@9; missed K-L@10	1	P00751
sp|P00751|CFAB_HUMAN	ALFVSEEEKKLTRK		missed K-K@9; missed K-L@10; missed R-K@13	1	P00751
sp|P00751|CFAB_HUMAN	ALRLPPTTTCQQQK	Carbamidomethyl(C)@10	missed R-L@3	1	P00751
sp|P00751|CFAB_HUMAN	ALRLPPTTTCQQQKEELLPAQDIK	Carbamidomethyl(C)@10	missed R-L@3; missed K-E@14	1	P00751
sp|P00751|CFAB_HUMAN	ALRLPPTTTCQQQKEELLPAQDIKALFVSEEEKK	Carbamidomethyl(C)@10	missed R-L@3; missed K-E@14; missed K-A@24; missed K-K@33	1	P00751
sp|P00751|CFAB_HUMAN	ARPQGSCSLEGVEIK	Carbamidomethyl(C)@7	cleaved L-A@N-term	1	P00751
sp|P00751|CFAB_HUMAN	CLVNLIEK	Carbamidomethyl(C)@1		1	P00751
sp|P00751|CFAB_HUMAN	DAQYAPGYDK			1	P00751
sp|P00751|CFAB_HUMAN	DAQYAPGYDKVK		missed K-V@10	1	P00751
sp|P00751|CFAB_HUMAN	DAQYAPGYDKVKDISEVVTPR		missed K-V@10; missed K-D@12	1	P00751
sp|P00751|CFAB_HUMAN	DFHINLF		cleaved F-Q@C-term	3	Q9Y210, P06681, P00751
sp|P00751|CFAB_HUMAN	DISEVVTPR			1	P00751
sp|P00751|CFAB_HUMAN	DLLYIGK			1	P00751
sp|P00751|CFAB_HUMAN	DLLYIGKDR		missed K-D@7	1	P00751
sp|P00751|CFAB_HUMAN	EAGIPEFYDYDVALIK			1	P00751
sp|P00751|CFAB_HUMAN	EELLPAQDIK			1	P00751
sp|P00751|CFAB_HUMAN	EKLQDEDLGFL		missed K-L@2	1	P00751
sp|P00751|CFAB_HUMAN	EVYIKNGDKKGSCERDAQYAPGYDK	Deamidated(N)@6; Carbamidomethyl(C)@13	missed K-N@5; missed K-K@9; missed K-G@10; missed R-D@15	1	P00751
sp|P00751|CFAB_HUMAN	EVYIKNGDKKGSCERDAQYAPGYDKVKDISEVVTPR	Deamidated(N)@6; Carbamidomethyl(C)@13; Deamidated(Q)@18	missed K-N@5; missed K-K@9; missed K-G@10; missed R-D@15; missed K-V@25; missed K-D@27	1	P00751
sp|P00751|CFAB_HUMAN	FLCTGGVSPYADPNTCR	Carbamidomethyl(C)@3; Carbamidomethyl(C)@16		1	P00751
sp|P00751|CFAB_HUMAN	FLCTGGVSPYADPNTCRGDSGGP	Carbamidomethyl(C)@3; Carbamidomethyl(C)@16	cleaved P-L@C-term; missed R-G@17	1	P00751
sp|P00751|CFAB_HUMAN	FLCTGGVSPYADPNTCRGDSGGPLIVHK	Carbamidomethyl(C)@3; Carbamidomethyl(C)@16	missed R-G@17	1	P00751
sp|P00751|CFAB_HUMAN	FLCTGGVSPYADPNTCRGDSGGPLIVHKR	Carbamidomethyl(C)@3; Carbamidomethyl(C)@16	missed R-G@17; missed K-R@28	1	P00751
sp|P00751|CFAB_HUMAN	FVSEEEKKLTR		cleaved L-F@N-term; missed K-K@7; missed K-L@8	1	P00751
sp|P00751|CFAB_HUMAN	GAGYCSNPGIPIGTR	Carbamidomethyl(C)@5	cleaved N-G@N-term	1	P00751
sp|P00751|CFAB_HUMAN	GIPEFYDYDVALIK		cleaved A-G@N-term	1	P00751
sp|P00751|CFAB_HUMAN	GLVTYATYPK		cleaved Y-G@N-term	1	P00751
sp|P00751|CFAB_HUMAN	GSCERDAQYAPGYDK	Carbamidomethyl(C)@3	missed R-D@5	1	P00751
sp|P00751|CFAB_HUMAN	GSCERDAQYAPGYDKVK	Carbamidomethyl(C)@3	missed R-D@5; missed K-V@15	1	P00751
sp|P00751|CFAB_HUMAN	GSCERDAQYAPGYDKVKDISEVVTPR	Carbamidomethyl(C)@3	missed R-D@5; missed K-V@15; missed K-D@17	1	P00751
sp|P00751|CFAB_HUMAN	GTDYHKQPWQAK		missed K-Q@6	1	P00751
sp|P00751|CFAB_HUMAN	ICLPCTEGTTRALRLPPTTTCQQQKEELLPAQDIK	Carbamidomethyl(C)@2; Carbamidomethyl(C)@5; Carbamidomethyl(C)@21	cleaved P-I@N-term; missed R-A@11; missed R-L@14; missed K-E@25	1	P00751
sp|P00751|CFAB_HUMAN	KCLVNLIEK	Carbamidomethyl@N-term; Carbamidomethyl(C)@2	missed K-C@1	1	P00751
sp|P00751|CFAB_HUMAN	KEAGIPEFYDYDVALIK		missed K-E@1	1	P00751
sp|P00751|CFAB_HUMAN	KEVYIKNGDKKGSCERDAQYAPGYDK	Deamidated(N)@7; Carbamidomethyl(C)@14	missed K-E@1; missed K-N@6; missed K-K@10; missed K-G@11; missed R-D@16	1	P00751
sp|P00751|CFAB_HUMAN	KGSCERDAQYAPGYDKVK	Carbamidomethyl(C)@4	missed K-G@1; missed R-D@6; missed K-V@16	1	P00751
sp|P00751|CFAB_HUMAN	KGSCERDAQYAPGYDKVKDISEVVTPR	Carbamidomethyl(C)@4	missed K-G@1; missed R-D@6; missed K-V@16; missed K-D@18	1	P00751
sp|P00751|CFAB_HUMAN	KVGSQYRLEDSVTYHCSR	Carbamidomethyl(C)@16	missed K-V@1; missed R-L@7	1	P00751
sp|P00751|CFAB_HUMAN	LEDSVTYHCSR	Carbamidomethyl(C)@9		1	P00751
sp|P00751|CFAB_HUMAN	LFVSEEEKK		cleaved A-L@N-term; missed K-K@8	1	P00751
sp|P00751|CFAB_HUMAN	LKYGQTIRPICLPCTEGTTR	Carbamidomethyl(C)@11; Carbamidomethyl(C)@14	missed K-Y@2	1	P00751
sp|P00751|CFAB_HUMAN	LLQEGQALEYVCPSGFYPYPVQTR	Carbamidomethyl(C)@12		1	P00751
sp|P00751|CFAB_HUMAN	LPPTTTCQQQKEELLPAQDIK	Carbamidomethyl(C)@7	missed K-E@11	1	P00751
sp|P00751|CFAB_HUMAN	LPPTTTCQQQKEELLPAQDIKALFVSEEEKK	Carbamidomethyl(C)@7	missed K-E@11; missed K-A@21; missed K-K@30	1	P00751
sp|P00751|CFAB_HUMAN	LQDEDLGFL	Carbamidomethyl@N-term		1	P00751
sp|P00751|CFAB_HUMAN	LTRKEVYIKNGDKKGSCERDAQYAPGYDKVKDISEVVTPR	Carbamidomethyl(C)@17	missed R-K@3; missed K-E@4; missed K-N@9; missed K-K@13; missed K-G@14; missed R-D@19; missed K-V@29; missed K-D@31	1	P00751
sp|P00751|CFAB_HUMAN	LVTYATYPK		cleaved G-L@N-term	1	P00751
sp|P00751|CFAB_HUMAN	NGDKKGSCERDAQYAPGYDK	Carbamidomethyl(C)@8	missed K-K@4; missed K-G@5; missed R-D@10	1	P00751
sp|P00751|CFAB_HUMAN	NGDKKGSCERDAQYAPGYDKVK	Deamidated(N)@1; Carbamidomethyl(C)@8	missed K-K@4; missed K-G@5; missed R-D@10; missed K-V@20	1	P00751
sp|P00751|CFAB_HUMAN	NGDKKGSCERDAQYAPGYDKVKDISEVVTPR	Carbamidomethyl(C)@8	missed K-K@4; missed K-G@5; missed R-D@10; missed K-V@20; missed K-D@22	1	P00751
sp|P00751|CFAB_HUMAN	NKLKYGQTIRPICLPCTEGTTR	Carbamidomethyl(C)@13; Carbamidomethyl(C)@16	missed K-L@2; missed K-Y@4	1	P00751
sp|P00751|CFAB_HUMAN	PHDFENGEYWPR		cleaved R-P@N-term	1	P00751
sp|P00751|CFAB_HUMAN	PICLPCTEGTTR	Carbamidomethyl(C)@3; Carbamidomethyl(C)@6	cleaved R-P@N-term	1	P00751
sp|P00751|CFAB_HUMAN	PKIWVKVSEADSSNADWVTK		cleaved Y-P@N-term; missed K-I@2; missed K-V@6	1	P00751
sp|P00751|CFAB_HUMAN	PQGSCSLEGVEIK	Carbamidomethyl(C)@5	cleaved R-P@N-term	1	P00751
sp|P00751|CFAB_HUMAN	PQGSCSLEGVEIKGGSFR	Carbamidomethyl(C)@5	cleaved R-P@N-term; missed K-G@13	1	P00751
sp|P00751|CFAB_HUMAN	PRYGLVTYATYPK		cleaved K-P@N-term; missed R-Y@2	1	P00751
sp|P00751|CFAB_HUMAN	PWSLARPQGSCSLEGVEIK	Carbamidomethyl@N-term; Oxidation(W)@2; Carbamidomethyl(C)@11	cleaved T-P@N-term	1	P00751
sp|P00751|CFAB_HUMAN	PWSLARPQGSCSLEGVEIKGGSFR	Carbamidomethyl@N-term; Oxidation(R)@6; Carbamidomethyl(C)@11	cleaved T-P@N-term; missed K-G@19	1	P00751
sp|P00751|CFAB_HUMAN	QGSCSLEGVEIK	Gln->pyro-Glu@N-term; Carbamidomethyl(C)@4	cleaved P-Q@N-term	1	P00751
sp|P00751|CFAB_HUMAN	QGSCSLEGVEIKGGSFR	Gln->pyro-Glu@N-term; Carbamidomethyl(C)@4	cleaved P-Q@N-term; missed K-G@12	1	P00751
sp|P00751|CFAB_HUMAN	QLNEINYEDHK	Gln->pyro-Glu@N-term		1	P00751
sp|P00751|CFAB_HUMAN	QLNEINYEDHKLK	Gln->pyro-Glu@N-term	missed K-L@11	1	P00751
sp|P00751|CFAB_HUMAN	QLNEINYEDHKLKSGTNTK		missed K-L@11; missed K-S@13	1	P00751
sp|P00751|CFAB_HUMAN	QQKEELLPAQDIK		cleaved Q-Q@N-term; missed K-E@3	1	P00751
sp|P00751|CFAB_HUMAN	QVPAHAR	Gln->pyro-Glu@N-term		1	P00751
sp|P00751|CFAB_HUMAN	RPQGSCSLEGVEIK	Carbamidomethyl(C)@6	cleaved A-R@N-term	1	P00751
sp|P00751|CFAB_HUMAN	RPQGSCSLEGVEIKGGSFR	Carbamidomethyl(C)@6	cleaved A-R@N-term; missed K-G@14	1	P00751
sp|P00751|CFAB_HUMAN	RYGLVTYATYPK	Dioxidation(R)@1	cleaved P-R@N-term; missed R-Y@1	1	P00751
sp|P00751|CFAB_HUMAN	SLARPQGSCSLEGVEIK	Carbamidomethyl(C)@9	cleaved W-S@N-term	1	P00751
sp|P00751|CFAB_HUMAN	SLARPQGSCSLEGVEIKGGSFR	Carbamidomethyl(C)@9	cleaved W-S@N-term; missed K-G@17	1	P00751
sp|P00751|CFAB_HUMAN	STGSWSTLK	Oxidation(W)@5		1	P00751
sp|P00751|CFAB_HUMAN	STGSWSTLKTQDQK		missed K-T@9	1	P00751
sp|P00751|CFAB_HUMAN	TCRSTGSWSTLK	Carbamidomethyl(C)@2	missed R-S@3	1	P00751
sp|P00751|CFAB_HUMAN	TCRSTGSWSTLKTQDQKTVR	Carbamidomethyl(C)@2	missed R-S@3; missed K-T@12; missed K-T@17	1	P00751
sp|P00751|CFAB_HUMAN	TPWSLARPQGSCSLEGVEIK	Carbamidomethyl(C)@12	cleaved T-T@N-term	1	P00751
sp|P00751|CFAB_HUMAN	TPWSLARPQGSCSLEGVEIKGGSFR	Carbamidomethyl(C)@12	cleaved T-T@N-term; missed K-G@20	1	P00751
sp|P00751|CFAB_HUMAN	TRALRLPPTTTCQQQKEELLPAQDIK	Formyl@N-term; Carbamidomethyl(C)@12	cleaved T-T@N-term; missed R-A@2; missed R-L@5; missed K-E@16	1	P00751
sp|P00751|CFAB_HUMAN	TTPWSLARPQGSCSLEGVEIK	Carbamidomethyl(C)@13	cleaved T-T@N-term	1	P00751
sp|P00751|CFAB_HUMAN	TTPWSLARPQGSCSLEGVEIKGGSFR	Carbamidomethyl(C)@13	cleaved T-T@N-term; missed K-G@21	1	P00751
sp|P00751|CFAB_HUMAN	VASYGVKPR			1	P00751
sp|P00751|CFAB_HUMAN	VGSQYRLEDSVTYHCSR	Carbamidomethyl(C)@15	missed R-L@6	1	P00751
sp|P00751|CFAB_HUMAN	VKDISEVVTPR		missed K-D@2	1	P00751
sp|P00751|CFAB_HUMAN	VSEADSSNADWVTK			1	P00751
sp|P00751|CFAB_HUMAN	VSEADSSNADWVTKQLNEINYEDHK	Lys->Allysine(K)@14	missed K-Q@14	1	P00751
sp|P00751|CFAB_HUMAN	VSEADSSNADWVTKQLNEINYEDHKLK	Dioxidation(W)@11	missed K-Q@14; missed K-L@25	1	P00751
sp|P00751|CFAB_HUMAN	WSGQTAICDNGAGYCSN	Carbamidomethyl(C)@8; Carbamidomethyl(C)@15; Dehydrated(S)@16	cleaved N-P@C-term	1	P00751
sp|P00751|CFAB_HUMAN	WSGQTAICDNGAGYCSNPGIPIGTR	Carbamidomethyl(C)@8; Carbamidomethyl(C)@15		1	P00751
sp|P00751|CFAB_HUMAN	WSGQTAICDNGAGYCSNPGIPIGTRK	Carbamidomethyl(C)@8; Carbamidomethyl(C)@15	missed R-K@25	1	P00751
sp|P00751|CFAB_HUMAN	WSLARPQGSCSLEGVEIK	Carbamidomethyl(C)@10	cleaved P-W@N-term	1	P00751
sp|P00751|CFAB_HUMAN	YGLVTYATYPK			1	P00751
sp|P00751|CFAB_HUMAN	YGQTIRPICLPCTEGTTR	Carbamidomethyl(C)@9; Carbamidomethyl(C)@12		1	P00751
sp|P00751|CFAB_HUMAN	PNTCRGDSGGPLIVHKR	Carbamidomethyl(C)@4	cleaved D-P@N-term; missed R-G@5; missed K-R@16	1	P00751
sp|P00751|CFAB_HUMAN	FLCTGGVSPYAD	Carbamidomethyl(C)@3	cleaved D-P@C-term	1	P00751
sp|P00751|CFAB_HUMAN	STGSWSTLKTQDQKTVR		missed K-T@9; missed K-T@14	1	P00751
sp|P00751|CFAB_HUMAN	QVLPWLK		cleaved F-Q@N-term	2	Q9BVH7, P00751
sp|P00751|CFAB_HUMAN	ASYGVKPR		cleaved V-A@N-term	1	P00751
sp|P00751|CFAB_HUMAN	FVSEEEKK		cleaved L-F@N-term; missed K-K@7	1	P00751
sp|P00751|CFAB_HUMAN	DYDVALIK		cleaved Y-D@N-term	2	Q7Z410, P00751
sp|P00751|CFAB_HUMAN	YGQTIRPICLPC	Carbamidomethyl(C)@9; Carbamidomethyl(C)@12	cleaved C-T@C-term	1	P00751
sp|P00751|CFAB_HUMAN	TPWSLAR		cleaved T-T@N-term; cleaved R-P@C-term	1	P00751
sp|P00751|CFAB_HUMAN	QPWQAK	Gln->pyro-Glu@N-term		1	P00751
sp|P00751|CFAB_HUMAN	ALRLPPTTTCQQQKEELLPAQDIKAL	Carbamidomethyl(C)@10; GlyGly(K)@24	cleaved L-F@C-term; missed R-L@3; missed K-E@14; missed K-A@24	1	P00751
sp|P00751|CFAB_HUMAN	PSGFYPYPVQTR		cleaved C-P@N-term	1	P00751
sp|P00751|CFAB_HUMAN	WSLARPQGSCSLEGVEIKGGSFR	Carbamidomethyl(C)@10	cleaved P-W@N-term; missed K-G@18	1	P00751
sp|P00751|CFAB_HUMAN	YADPNTCRGDSGGPLIVHKR	Carbamidomethyl(C)@7	cleaved P-Y@N-term; missed R-G@8; missed K-R@19	1	P00751
sp|P00751|CFAB_HUMAN	NLSPQLCLMPFILGLLSGGVTTTPWSLARPQGSCSLEGVEIK	Oxidation(P)@4; Carbamidomethyl(C)@7; Carbamidomethyl(C)@34	cleaved S-N@N-term	1	P00751
sp|P00751|CFAB_HUMAN	DKVKDISEVVTPR		cleaved Y-D@N-term; missed K-V@2; missed K-D@4	1	P00751
sp|P00751|CFAB_HUMAN	VYIKNGDKKGSCERDAQYAPGYDKVKDISEVVTPR	Carbamidomethyl(C)@12	cleaved E-V@N-term; missed K-N@4; missed K-K@8; missed K-G@9; missed R-D@14; missed K-V@24; missed K-D@26	1	P00751
sp|P00751|CFAB_HUMAN	VSEEEKK		cleaved F-V@N-term; missed K-K@6	2	Q9NXP7, P00751
sp|P00751|CFAB_HUMAN	RDAQYAPGYDKVKDISEVVTPR	Methyl(D)@2	cleaved E-R@N-term; missed R-D@1; missed K-V@11; missed K-D@13	1	P00751
sp|P00751|CFAB_HUMAN	SQYRLEDSVTYHCSR	Carbamidomethyl(C)@13	cleaved G-S@N-term; missed R-L@4	1	P00751
sp|P00751|CFAB_HUMAN	PGYDK		cleaved A-P@N-term	NA, length less than 6
sp|P00751|CFAB_HUMAN	TGAKKCLVNLIEK	Carbamidomethyl@N-term; Carbamidomethyl(C)@6	cleaved F-T@N-term; missed K-K@4; missed K-C@5	1	P00751
sp|P00751|CFAB_HUMAN	APGYDKVKDISEVVTPRFLCTGGVSPYADPNTCR	Carbamidomethyl@N-term; Carbamidomethyl(C)@20; Carbamidomethyl(C)@33	cleaved Y-A@N-term; missed K-V@6; missed K-D@8; missed R-F@17	1	P00751
sp|P00751|CFAB_HUMAN	CSNPGIPIGTR	Carbamidomethyl(C)@1	cleaved Y-C@N-term	1	P00751
sp|P00751|CFAB_HUMAN	YGLVTYATYPKIWVK	Trp->Hydroxykynurenin(W)@13	missed K-I@11	1	P00751
sp|P00751|CFAB_HUMAN	ALRLPPTTTCQQQKEELL	Carbamidomethyl(C)@10	cleaved L-P@C-term; missed R-L@3; missed K-E@14	1	P00751
sp|P00751|CFAB_HUMAN	LVNQVNINALASK		cleaved P-L@N-term	1	P00751
sp|P00751|CFAB_HUMAN	ALRLPPTTTCQQQKEELLPAQDIKALF	Carbamidomethyl(C)@10; Oxidation(P)@19; Deamidated(Q)@21	cleaved F-V@C-term; missed R-L@3; missed K-E@14; missed K-A@24	1	P00751
sp|P00751|CFAB_HUMAN	CLVNLIEKVASYGVKPRYGLVTYATYPK	Carbamidomethyl(C)@1; PyruvicAcidIminyl(K)@15	missed K-V@8; missed R-Y@17	1	P00751
sp|P00751|CFAB_HUMAN	EKVASYGVKPRYGLVTYATYPKIWVKVSEADSSNADWVTK	Oxidation(Y)@6	cleaved I-E@N-term; missed K-V@2; missed R-Y@11; missed K-I@22; missed K-V@26	1	P00751
sp|P0C0L4|CO4A_HUMAN	AAANQMRNFLVR		missed R-N@7	2	P0C0L5, P0C0L4
sp|P0C0L4|CO4A_HUMAN	AACAQLNDFLQEYGTQGCQV	Carbamidomethyl(C)@3; Carbamidomethyl(C)@18		2	P0C0L5, P0C0L4
sp|P0C0L4|CO4A_HUMAN	AAFRLFETK		missed R-L@4	2	P0C0L5, P0C0L4
sp|P0C0L4|CO4A_HUMAN	ADGSYAAWLSR			2	P0C0L5, P0C0L4
sp|P0C0L4|CO4A_HUMAN	ADLEKLTSLSDR		missed K-L@5	2	P0C0L5, P0C0L4
sp|P0C0L4|CO4A_HUMAN	AINEKLGQYASPTAK		missed K-L@5	2	P0C0L5, P0C0L4
sp|P0C0L4|CO4A_HUMAN	AINEKLGQYASPTAKR		missed K-L@5; missed K-R@15	2	P0C0L5, P0C0L4
sp|P0C0L4|CO4A_HUMAN	ALEILQEEDLIDEDDIPVR			2	P0C0L5, P0C0L4
sp|P0C0L4|CO4A_HUMAN	CAQLNDFLQEYGTQGCQV	Carbamidomethyl(C)@1; Carbamidomethyl(C)@16	cleaved A-C@N-term	2	P0C0L5, P0C0L4
sp|P0C0L4|CO4A_HUMAN	CCQDGVTR	Carbamidomethyl(C)@1; Carbamidomethyl(C)@2; Deamidated(Q)@3; Dehydrated(D)@4		2	P0C0L5, P0C0L4
sp|P0C0L4|CO4A_HUMAN	CCQDGVTRLPM	Carbamidomethyl(C)@1; Carbamidomethyl(C)@2; Deamidated(Q)@3; Dehydrated(D)@4	cleaved M-M@C-term; missed R-L@8	2	P0C0L5, P0C0L4
sp|P0C0L4|CO4A_HUMAN	CCQDGVTRLPMMR	Carbamidomethyl(C)@1; Carbamidomethyl(C)@2; Deamidated(Q)@3; Dehydrated(D)@4	missed R-L@8	2	P0C0L5, P0C0L4
sp|P0C0L4|CO4A_HUMAN	CSVFYGAPSK	Carbamidomethyl(C)@1		2	P0C0L5, P0C0L4
sp|P0C0L4|CO4A_HUMAN	CSVFYGAPSKSR	Carbamidomethyl(C)@1	missed K-S@10	2	P0C0L5, P0C0L4
sp|P0C0L4|CO4A_HUMAN	DDPDAPLQPVTPLQLFEGR			2	P0C0L5, P0C0L4
sp|P0C0L4|CO4A_HUMAN	DFALLSLQVPLKDAK		missed K-D@12	2	P0C0L5, P0C0L4
sp|P0C0L4|CO4A_HUMAN	DGSYAAWLSR		cleaved A-D@N-term	2	P0C0L5, P0C0L4
sp|P0C0L4|CO4A_HUMAN	DSSTWLTAFVLK			2	P0C0L5, P0C0L4
sp|P0C0L4|CO4A_HUMAN	EAPKVVEEQESR		missed K-V@4	2	P0C0L5, P0C0L4
sp|P0C0L4|CO4A_HUMAN	ECVGFEAVQEVPVGLVQPASATLYDYYNPER	Carbamidomethyl(C)@2		2	P0C0L5, P0C0L4
sp|P0C0L4|CO4A_HUMAN	ECVGFEAVQEVPVGLVQPASATLYDYYNPERR	Carbamidomethyl(C)@2	missed R-R@31	2	P0C0L5, P0C0L4
sp|P0C0L4|CO4A_HUMAN	EELVYELNPLDHR			2	P0C0L5, P0C0L4
sp|P0C0L4|CO4A_HUMAN	EGAIHREELVYELNPLDHR		missed R-E@6	2	P0C0L5, P0C0L4
sp|P0C0L4|CO4A_HUMAN	EMSGSPASGIPVK			2	P0C0L5, P0C0L4
sp|P0C0L4|CO4A_HUMAN	EPFLSCCQFAESLR	Carbamidomethyl(C)@6; Carbamidomethyl(C)@7		2	P0C0L5, P0C0L4
sp|P0C0L4|CO4A_HUMAN	EPFLSCCQFAESLRK	Carbamidomethyl(C)@6; Carbamidomethyl(C)@7	missed R-K@14	2	P0C0L5, P0C0L4
sp|P0C0L4|CO4A_HUMAN	EVQLVAHSPWLK		cleaved P-E@N-term	2	P0C0L5, P0C0L4
sp|P0C0L4|CO4A_HUMAN	FACYYPR	Carbamidomethyl(C)@3		2	P0C0L5, P0C0L4
sp|P0C0L4|CO4A_HUMAN	FLSCCQFAESLR	Carbamidomethyl(C)@4; Carbamidomethyl(C)@5	cleaved P-F@N-term	2	P0C0L5, P0C0L4
sp|P0C0L4|CO4A_HUMAN	FLSCCQFAESLRK	Carbamidomethyl(C)@4; Carbamidomethyl(C)@5	cleaved P-F@N-term; missed R-K@12	2	P0C0L5, P0C0L4
sp|P0C0L4|CO4A_HUMAN	FRLFETK		cleaved A-F@N-term; missed R-L@2	2	P0C0L5, P0C0L4
sp|P0C0L4|CO4A_HUMAN	GCGEQTMIYLAPTLAASR	Carbamidomethyl(C)@2; Deamidated(Q)@5		2	P0C0L5, P0C0L4
sp|P0C0L4|CO4A_HUMAN	GHLFLQTDQPIYNPGQR			2	P0C0L5, P0C0L4
sp|P0C0L4|CO4A_HUMAN	GLCVATPVQLR	Carbamidomethyl(C)@3		2	P0C0L5, P0C0L4
sp|P0C0L4|CO4A_HUMAN	GLEEELQFSLGSK			2	P0C0L5, P0C0L4
sp|P0C0L4|CO4A_HUMAN	GLQDEDGYR			2	P0C0L5, P0C0L4
sp|P0C0L4|CO4A_HUMAN	GLQDEDGYRMK		missed R-M@9	2	P0C0L5, P0C0L4
sp|P0C0L4|CO4A_HUMAN	GPEVQLVAHSPWLK			2	P0C0L5, P0C0L4
sp|P0C0L4|CO4A_HUMAN	GPEVQLVAHSPWLKDSLSR		missed K-D@14	2	P0C0L5, P0C0L4
sp|P0C0L4|CO4A_HUMAN	GRTLEIPGNSDPNMIPDGDFNSYVR	Oxidation(P)@12; Deamidated(N)@21	missed R-T@2	2	P0C0L5, P0C0L4
sp|P0C0L4|CO4A_HUMAN	GSFEFPVGDAVSK			2	P0C0L5, P0C0L4
sp|P0C0L4|CO4A_HUMAN	GSVFLRNPSR		missed R-N@6	2	P0C0L5, P0C0L4
sp|P0C0L4|CO4A_HUMAN	GSVFLRNPSRNNVPCSPK	Carbamidomethyl(C)@15	missed R-N@6; missed R-N@10	2	P0C0L5, P0C0L4
sp|P0C0L4|CO4A_HUMAN	ITQVLHFTK			2	P0C0L5, P0C0L4
sp|P0C0L4|CO4A_HUMAN	ITQVLHFTKDVK		missed K-D@9	2	P0C0L5, P0C0L4
sp|P0C0L4|CO4A_HUMAN	KADGSYAAWLSR		missed K-A@1	2	P0C0L5, P0C0L4
sp|P0C0L4|CO4A_HUMAN	KGYMRIQQFRKADGSYAAWLSR	Oxidation(M)@4; Deamidated(Q)@8	cleaved Q-K@N-term; missed K-G@1; missed R-I@5; missed R-K@10; missed K-A@11	2	P0C0L5, P0C0L4
sp|P0C0L4|CO4A_HUMAN	KKSRDKGQAGLQRALEILQEEDLIDEDDIPVR		missed K-K@1; missed K-S@2; missed R-D@4; missed K-G@6; missed R-A@13	2	P0C0L5, P0C0L4
sp|P0C0L4|CO4A_HUMAN	KYVLPNFEVK		missed K-Y@1	2	P0C0L5, P0C0L4
sp|P0C0L4|CO4A_HUMAN	LGQYASPTAK			2	P0C0L5, P0C0L4
sp|P0C0L4|CO4A_HUMAN	LGQYASPTAKR		missed K-R@10	2	P0C0L5, P0C0L4
sp|P0C0L4|CO4A_HUMAN	LLATLCSAEV	Carbamidomethyl(C)@6	cleaved V-C@C-term	2	P0C0L5, P0C0L4
sp|P0C0L4|CO4A_HUMAN	LLATLCSAEVCQCAEGK	Carbamidomethyl(C)@6; Carbamidomethyl(C)@11; Carbamidomethyl(C)@13		2	P0C0L5, P0C0L4
sp|P0C0L4|CO4A_HUMAN	LLATLCSAEVCQCAEGKCPR	Carbamidomethyl(C)@6; Carbamidomethyl(C)@11; Carbamidomethyl(C)@13; Carbamidomethyl(C)@18	missed K-C@17	2	P0C0L5, P0C0L4
sp|P0C0L4|CO4A_HUMAN	LTVAAPPSGGPGFLSIERPDSRPPR			2	P0C0L5, P0C0L4
sp|P0C0L4|CO4A_HUMAN	MKFACYYPR	Carbamidomethyl(C)@5	missed K-F@2	2	P0C0L5, P0C0L4
sp|P0C0L4|CO4A_HUMAN	MRPSTDTITVMVENSHGLR			2	P0C0L5, P0C0L4
sp|P0C0L4|CO4A_HUMAN	NGFKSHALQLNNR	Deamidated(N)@1	missed K-S@4	2	P0C0L5, P0C0L4
sp|P0C0L4|CO4A_HUMAN	NNVPCSPKVDFTLSSER	Carbamidomethyl(C)@5	missed K-V@8	2	P0C0L5, P0C0L4
sp|P0C0L4|CO4A_HUMAN	PNMIPDGDFNSYVR		cleaved D-P@N-term	2	P0C0L5, P0C0L4
sp|P0C0L4|CO4A_HUMAN	QGSFQGGFR	Gln->pyro-Glu@N-term		2	P0C0L5, P0C0L4
sp|P0C0L4|CO4A_HUMAN	QLNDFLQEYGTQGCQV	Carbamidomethyl(C)@14	cleaved A-Q@N-term	2	P0C0L5, P0C0L4
sp|P0C0L4|CO4A_HUMAN	QRAACAQLNDFLQEYGTQGCQV	Gln->pyro-Glu@N-term; Carbamidomethyl(C)@5; Carbamidomethyl(C)@20	missed R-A@2	2	P0C0L5, P0C0L4
sp|P0C0L4|CO4A_HUMAN	RCCQDGVTRLPM	Carbamidomethyl(C)@2; Carbamidomethyl(C)@3	cleaved M-M@C-term; missed R-C@1; missed R-L@9	2	P0C0L5, P0C0L4
sp|P0C0L4|CO4A_HUMAN	RCCQDGVTRLPMMR	Carbamidomethyl(C)@2; Carbamidomethyl(C)@3	missed R-C@1; missed R-L@9	2	P0C0L5, P0C0L4
sp|P0C0L4|CO4A_HUMAN	RCSVFYGAPSK	Carbamidomethyl(C)@2	missed R-C@1	2	P0C0L5, P0C0L4
sp|P0C0L4|CO4A_HUMAN	RGHLFLQTDQPIYNPGQR		missed R-G@1	2	P0C0L5, P0C0L4
sp|P0C0L4|CO4A_HUMAN	SCGLHQLLR	Carbamidomethyl(C)@2		2	P0C0L5, P0C0L4
sp|P0C0L4|CO4A_HUMAN	SHALQLNNR			2	P0C0L5, P0C0L4
sp|P0C0L4|CO4A_HUMAN	SKSRLLATLCSAEVCQCAEGKCPR	Carbamidomethyl(C)@10; Carbamidomethyl(C)@15; Carbamidomethyl(C)@17; Carbamidomethyl(C)@22	cleaved P-S@N-term; missed K-S@2; missed R-L@4; missed K-C@21	2	P0C0L5, P0C0L4
sp|P0C0L4|CO4A_HUMAN	SRLLATLCSAEVCQCAEGK	Carbamidomethyl(C)@8; Carbamidomethyl(C)@13; Carbamidomethyl(C)@15	missed R-L@2	2	P0C0L5, P0C0L4
sp|P0C0L4|CO4A_HUMAN	SRLLATLCSAEVCQCAEGKCPR	Carbamidomethyl(C)@8; Carbamidomethyl(C)@13; Carbamidomethyl(C)@15; Carbamidomethyl(C)@20	missed R-L@2; missed K-C@19	2	P0C0L5, P0C0L4
sp|P0C0L4|CO4A_HUMAN	SVFYGAPSK		cleaved C-S@N-term	2	P0C0L5, P0C0L4
sp|P0C0L4|CO4A_HUMAN	TKGLCVATPVQLR	Carbamidomethyl(C)@5	missed K-G@2	2	P0C0L5, P0C0L4
sp|P0C0L4|CO4A_HUMAN	TLEIPGNSDPNMIPDGDFNSYVR			2	P0C0L5, P0C0L4
sp|P0C0L4|CO4A_HUMAN	TQVLHFTK		cleaved I-T@N-term	2	P0C0L5, P0C0L4
sp|P0C0L4|CO4A_HUMAN	TTNIQGINLLFSSR			2	P0C0L5, P0C0L4
sp|P0C0L4|CO4A_HUMAN	TYNVLDMK			2	P0C0L5, P0C0L4
sp|P0C0L4|CO4A_HUMAN	VDFTLSSER			2	P0C0L5, P0C0L4
sp|P0C0L4|CO4A_HUMAN	VEYGFQVK	Carbamidomethyl@N-term		2	P0C0L5, P0C0L4
sp|P0C0L4|CO4A_HUMAN	VFALDQK			2	P0C0L5, P0C0L4
sp|P0C0L4|CO4A_HUMAN	VGDTLNLNLR			2	P0C0L5, P0C0L4
sp|P0C0L4|CO4A_HUMAN	VHYTVCIWR	Carbamidomethyl(C)@6		2	P0C0L5, P0C0L4
sp|P0C0L4|CO4A_HUMAN	VLQIEKEGAIHREELVYELNPLDHR		missed K-E@6; missed R-E@12	2	P0C0L5, P0C0L4
sp|P0C0L4|CO4A_HUMAN	VLSLAQEQVGGSPEKLQETSNWLLSQQQADGSFQDPCPVLDR	Carbamidomethyl(C)@37	missed K-L@15	1	P0C0L4
sp|P0C0L4|CO4A_HUMAN	VQQPDCREPFLSCCQFAESLR	Carbamidomethyl(C)@6; Carbamidomethyl(C)@13; Carbamidomethyl(C)@14	missed R-E@7	2	P0C0L5, P0C0L4
sp|P0C0L4|CO4A_HUMAN	VQQPDCREPFLSCCQFAESLRK	Carbamidomethyl(C)@6; Carbamidomethyl(C)@13; Carbamidomethyl(C)@14	missed R-E@7; missed R-K@21	2	P0C0L5, P0C0L4
sp|P0C0L4|CO4A_HUMAN	VQQPDCREPFLSCCQFAESLRKK	Carbamidomethyl(C)@6; Carbamidomethyl(C)@13; Carbamidomethyl(C)@14	missed R-E@7; missed R-K@21; missed K-K@22	2	P0C0L5, P0C0L4
sp|P0C0L4|CO4A_HUMAN	VTASDPLDTLGSEGALSPGGVASLLR			2	P0C0L5, P0C0L4
sp|P0C0L4|CO4A_HUMAN	VTASDPLDTLGSEGALSPGGVASLLRLPR		missed R-L@26	2	P0C0L5, P0C0L4
sp|P0C0L4|CO4A_HUMAN	YGAPSK		cleaved F-Y@N-term	2	P0C0L5, P0C0L4
sp|P0C0L4|CO4A_HUMAN	YIYGKPVQGVAYVR			2	P0C0L5, P0C0L4
sp|P0C0L4|CO4A_HUMAN	YLDKTEQWSTLPPETK		missed K-T@4	2	P0C0L5, P0C0L4
sp|P0C0L4|CO4A_HUMAN	YLDKTEQWSTLPPETKDHAVDLIQK		missed K-T@4; missed K-D@16	2	P0C0L5, P0C0L4
sp|P0C0L4|CO4A_HUMAN	YRVFALDQK		missed R-V@2	2	P0C0L5, P0C0L4
sp|P0C0L4|CO4A_HUMAN	YVLPNFEVK			2	P0C0L5, P0C0L4
sp|P0C0L4|CO4A_HUMAN	DDPDAPLQPVTPLQLFEGRR		missed R-R@19	2	P0C0L5, P0C0L4
sp|P0C0L4|CO4A_HUMAN	ARVQQPDCREPFLSCCQFAESLR	Deamidated(Q)@4; Carbamidomethyl(C)@8; Carbamidomethyl(C)@15; Carbamidomethyl(C)@16	cleaved A-A@N-term; missed R-V@2; missed R-E@9	2	P0C0L5, P0C0L4
sp|P0C0L4|CO4A_HUMAN	GQIVFMNR			2	P0C0L5, P0C0L4
sp|P0C0L4|CO4A_HUMAN	VQQPDCREPF	Carbamidomethyl(C)@6	cleaved F-L@C-term; missed R-E@7	2	P0C0L5, P0C0L4
sp|P0C0L4|CO4A_HUMAN	NVNFQK			2	P0C0L5, P0C0L4
sp|P0C0L4|CO4A_HUMAN	LSCCQFAESLR	Carbamidomethyl(C)@3; Carbamidomethyl(C)@4	cleaved F-L@N-term	2	P0C0L5, P0C0L4
sp|P0C0L4|CO4A_HUMAN	CYYPR	Carbamidomethyl(C)@1	cleaved A-C@N-term	NA, length less than 6
sp|P0C0L4|CO4A_HUMAN	LTSLSDR			2	P0C0L5, P0C0L4
sp|P0C0L4|CO4A_HUMAN	RCSVFYGAPSKSRLLATLCSAEVCQCAEGK	Carbamidomethyl(C)@2; Tyr->Dha(Y)@6; Carbamidomethyl(C)@19; Carbamidomethyl(C)@24; Carbamidomethyl(C)@26	missed R-C@1; missed K-S@11; missed R-L@13	2	P0C0L5, P0C0L4
sp|P0C0L4|CO4A_HUMAN	LLATLCSAEVCQCAEGKCPRQR	Carbamidomethyl(C)@6; Carbamidomethyl(C)@11; Carbamidomethyl(C)@13; Carbamidomethyl(C)@18	missed K-C@17; missed R-Q@20	2	P0C0L5, P0C0L4
sp|P0C0L4|CO4A_HUMAN	YFDSVPTSR		cleaved L-Y@N-term	2	P0C0L5, P0C0L4
sp|P0C0L4|CO4A_HUMAN	LTVAAPPSGGPGFLSIERPDSRPPRVGDTLNLNLR		missed R-V@25	2	P0C0L5, P0C0L4
sp|P0C0L4|CO4A_HUMAN	VEASISKANSFLGEK		missed K-A@7	2	P0C0L5, P0C0L4
sp|P0C0L4|CO4A_HUMAN	GLEEELQFSLGSKINVK		missed K-I@13	2	P0C0L5, P0C0L4
sp|P0C0L4|CO4A_HUMAN	VFYGAPSKSRLLATLCSAEVCQCAEGKCPR	Carbamidomethyl(C)@16; Carbamidomethyl(C)@21; Carbamidomethyl(C)@23; Carbamidomethyl(C)@28	cleaved S-V@N-term; missed K-S@8; missed R-L@10; missed K-C@27	2	P0C0L5, P0C0L4
sp|P0C0L4|CO4A_HUMAN	ITPGKPYILTVPGHLDEMQLDIQAR	Carbamidomethyl(E)@17		2	P0C0L5, P0C0L4
sp|P0C0L4|CO4A_HUMAN	SDPNMIPDGDFNSYVR		cleaved N-S@N-term	2	P0C0L5, P0C0L4
sp|P0C0L4|CO4A_HUMAN	GQVVKGSVFLR	Acetyl@N-term	missed K-G@5	2	P0C0L5, P0C0L4
sp|P0C0L4|CO4A_HUMAN	TVCIWR	Carbamidomethyl(C)@3	cleaved Y-T@N-term	3	P0C0L5, P0C0L4, O76071
sp|P0C0L4|CO4A_HUMAN	AARVQQPDCREPFLSCCQFAESLR	Deamidated(Q)@6; Carbamidomethyl(C)@9; Carbamidomethyl(C)@16; Carbamidomethyl(C)@17	missed R-V@3; missed R-E@10	2	P0C0L5, P0C0L4
sp|P0C0L4|CO4A_HUMAN	EIPGNSDPNMIPDGDFNSYVR	Deamidated(N)@5; Deamidated(N)@9	cleaved L-E@N-term	2	P0C0L5, P0C0L4
sp|P0C0L4|CO4A_HUMAN	NFLVR	Carbamidomethyl@N-term		NA, length less than 6
sp|P0C0L4|CO4A_HUMAN	SSTWLTAFVLK	Carbamidomethyl@N-term	cleaved D-S@N-term	2	P0C0L5, P0C0L4
sp|P0C0L4|CO4A_HUMAN	VFYGAPSK		cleaved S-V@N-term	2	P0C0L5, P0C0L4
sp|P0C0L4|CO4A_HUMAN	EELVYELNPLDHRGRTLEIPGNSDPNMIPDGDFNSYVR	Glu->pyro-Glu@N-term; Carbamidomethyl(E)@18	missed R-G@13; missed R-T@15	2	P0C0L5, P0C0L4
sp|P0C0L4|CO4A_HUMAN	IADVTLLSGFHALR		cleaved A-I@N-term	2	P0C0L5, P0C0L4
sp|P0C0L4|CO4A_HUMAN	LGQYASPTAKRCCQDGVTRLPMMR	Deamidated(Q)@3; Carbamidomethyl(C)@12; Carbamidomethyl(C)@13; Deamidated(Q)@14	missed K-R@10; missed R-C@11; missed R-L@19	2	P0C0L5, P0C0L4
sp|P0C0L4|CO4A_HUMAN	DYYNPERRCSVFYGAPSK	Cation:Na(E)@6; Carbamidomethyl(C)@9	cleaved Y-D@N-term; missed R-R@7; missed R-C@8	2	P0C0L5, P0C0L4
sp|P0C0L4|CO4A_HUMAN	LATLCSAEVCQCAEGKCPR	Carbamidomethyl(C)@5; Carbamidomethyl(C)@10; Carbamidomethyl(C)@12; Carbamidomethyl(C)@17	cleaved L-L@N-term; missed K-C@16	2	P0C0L5, P0C0L4
sp|P0C0L4|CO4A_HUMAN	QRVEASISK	Arg->GluSA(R)@2	missed R-V@2	2	P0C0L5, P0C0L4
sp|P02774|VTDB_HUMAN	AKLPDATPK		missed K-L@2	1	P02774
sp|P02774|VTDB_HUMAN	AKLPDATPKELAK		missed K-L@2; missed K-E@9	1	P02774
sp|P02774|VTDB_HUMAN	CCESASEDCMAK	Carbamidomethyl(C)@1; Carbamidomethyl(C)@2; Carbamidomethyl(C)@9		1	P02774
sp|P02774|VTDB_HUMAN	CCESASEDCMAKELPEHTVK	Carbamidomethyl(C)@1; Carbamidomethyl(C)@2; Carbamidomethyl(C)@9	missed K-E@12	1	P02774
sp|P02774|VTDB_HUMAN	CCESASEDCMAKELPEHTVKLCDNLSTK	Carbamidomethyl(C)@1; Carbamidomethyl(C)@2; Deoxy(D)@8; Carbamidomethyl(C)@9; Carbamidomethyl(C)@22	missed K-E@12; missed K-L@20	1	P02774
sp|P02774|VTDB_HUMAN	DVCDPGNTKVMDKYTFELSR	Carbamidomethyl(C)@3	missed K-V@9; missed K-Y@13	1	P02774
sp|P02774|VTDB_HUMAN	EDFTSLSLVLYSR			1	P02774
sp|P02774|VTDB_HUMAN	EFSHLGKEDFTSLSLVLYSR		missed K-E@7	1	P02774
sp|P02774|VTDB_HUMAN	ELPEHTVK	Glu->pyro-Glu@N-term		1	P02774
sp|P02774|VTDB_HUMAN	ELPEHTVKLCDNLSTK	Carbamidomethyl(C)@10	missed K-L@8	1	P02774
sp|P02774|VTDB_HUMAN	ELPEHTVKLCDNLSTKNSK	Carbamidomethyl(C)@10	missed K-L@8; missed K-N@16	1	P02774
sp|P02774|VTDB_HUMAN	ELPEHTVKLCDNLSTKNSKFEDCCQEK	Carbamidomethyl(C)@10; Carbamidomethyl(C)@23; Carbamidomethyl(C)@24	missed K-L@8; missed K-N@16; missed K-F@19	1	P02774
sp|P02774|VTDB_HUMAN	ELSSFIDK			1	P02774
sp|P02774|VTDB_HUMAN	ELSSFIDKGQELCADYSENTFTEYK	Carbamidomethyl(C)@13	missed K-G@8	1	P02774
sp|P02774|VTDB_HUMAN	ELSSFIDKGQELCADYSENTFTEYKK	Carbamidomethyl(C)@13	missed K-G@8; missed K-K@25	1	P02774
sp|P02774|VTDB_HUMAN	ELSSFIDKGQELCADYSENTFTEYKKK	Carbamidomethyl(C)@13	missed K-G@8; missed K-K@25; missed K-K@26	1	P02774
sp|P02774|VTDB_HUMAN	EVVSLTEACCAEGAD	Carbamidomethyl(C)@9; Carbamidomethyl(C)@10	cleaved D-P@C-term	1	P02774
sp|P02774|VTDB_HUMAN	EVVSLTEACCAEGADPDCYDTR	Carbamidomethyl(C)@9; Carbamidomethyl(C)@10; Carbamidomethyl(C)@18		1	P02774
sp|P02774|VTDB_HUMAN	EVVSLTEACCAEGADPDCYDTRTSALSAK	Carbamidomethyl(C)@9; Carbamidomethyl(C)@10; Carbamidomethyl(C)@18	missed R-T@22	1	P02774
sp|P02774|VTDB_HUMAN	FEDCCQEK	Carbamidomethyl(C)@4; Carbamidomethyl(C)@5		1	P02774
sp|P02774|VTDB_HUMAN	FMPAAQLPELPDVELPTNKDVCDPGNTK	Carbamidomethyl(C)@22	cleaved Y-F@N-term; missed K-D@19	1	P02774
sp|P02774|VTDB_HUMAN	FPSGTFEQVSQLVK			1	P02774
sp|P02774|VTDB_HUMAN	FPVHPGTAECCTK	Carbamidomethyl(C)@10; Carbamidomethyl(C)@11	cleaved P-F@N-term	1	P02774
sp|P02774|VTDB_HUMAN	GECCDVEDSTTCFNAKGPLLKK	Carbamidomethyl(C)@3; Carbamidomethyl(C)@4; HexNAc(S)@9; Carbamidomethyl(C)@12	cleaved L-G@N-term; missed K-G@16; missed K-K@21	1	P02774
sp|P02774|VTDB_HUMAN	GQELCADYSENTFTEYK	Carbamidomethyl(C)@5		1	P02774
sp|P02774|VTDB_HUMAN	GQELCADYSENTFTEYKK	Carbamidomethyl(C)@5	missed K-K@17	1	P02774
sp|P02774|VTDB_HUMAN	GQELCADYSENTFTEYKKK	Carbamidomethyl(C)@5	missed K-K@17; missed K-K@18	1	P02774
sp|P02774|VTDB_HUMAN	HLPEVFLSK		cleaved T-H@N-term	1	P02774
sp|P02774|VTDB_HUMAN	HLSLLTTLSNR			1	P02774
sp|P02774|VTDB_HUMAN	HQPQEFPTYVEPTNDEICEAFR	Carbamidomethyl(C)@18		1	P02774
sp|P02774|VTDB_HUMAN	HQPQEFPTYVEPTNDEICEAFRK	Carbamidomethyl(C)@18	missed R-K@22	1	P02774
sp|P02774|VTDB_HUMAN	HQPQEFPTYVEPTNDEICEAFRKD	Carbamidomethyl(C)@18	cleaved D-P@C-term; missed R-K@22; missed K-D@23	1	P02774
sp|P02774|VTDB_HUMAN	HQPQEFPTYVEPTNDEICEAFRKDPK	Carbamidomethyl(C)@18	missed R-K@22; missed K-D@23	1	P02774
sp|P02774|VTDB_HUMAN	KELSSFIDKGQELCADYSENTFTEYK	Carbamidomethyl(C)@14	missed K-E@1; missed K-G@9	1	P02774
sp|P02774|VTDB_HUMAN	KELSSFIDKGQELCADYSENTFTEYKK	Carbamidomethyl(C)@14	missed K-E@1; missed K-G@9; missed K-K@26	1	P02774
sp|P02774|VTDB_HUMAN	KELSSFIDKGQELCADYSENTFTEYKKK	Carbamidomethyl(C)@14	missed K-E@1; missed K-G@9; missed K-K@26; missed K-K@27	1	P02774
sp|P02774|VTDB_HUMAN	KFPSGTFEQVSQLVK		missed K-F@1	1	P02774
sp|P02774|VTDB_HUMAN	KLCMAALK	Carbamidomethyl(C)@3	missed K-L@1	1	P02774
sp|P02774|VTDB_HUMAN	KLCMAALKHQPQEFPTYVEPTNDEICEAFR	Carbamidomethyl(C)@3; Carbamidomethyl(C)@26	missed K-L@1; missed K-H@8	1	P02774
sp|P02774|VTDB_HUMAN	KSLGECCDVEDSTTCFNAK	Carbamidomethyl(C)@6; Carbamidomethyl(C)@7; Carbamidomethyl(C)@15	cleaved L-K@N-term; missed K-S@1	1	P02774
sp|P02774|VTDB_HUMAN	LAQKVPTADLEDVLPLAEDITNILSK		missed K-V@4	1	P02774
sp|P02774|VTDB_HUMAN	LCDNLSTK	Carbamidomethyl(C)@2		1	P02774
sp|P02774|VTDB_HUMAN	LCDNLSTKNSKFEDCCQEK	Carbamidomethyl(C)@2; Carbamidomethyl(C)@15; Carbamidomethyl(C)@16	missed K-N@8; missed K-F@11	1	P02774
sp|P02774|VTDB_HUMAN	LCMAALK	Carbamidomethyl(C)@2		1	P02774
sp|P02774|VTDB_HUMAN	LKAKLPDATPK		missed K-A@2; missed K-L@4	1	P02774
sp|P02774|VTDB_HUMAN	LKAKLPDATPKELAK		missed K-A@2; missed K-L@4; missed K-E@11	1	P02774
sp|P02774|VTDB_HUMAN	LPDATPKELAK		missed K-E@7	1	P02774
sp|P02774|VTDB_HUMAN	NSKFEDCCQEK	Carbamidomethyl(C)@7; Carbamidomethyl(C)@8	missed K-F@3	1	P02774
sp|P02774|VTDB_HUMAN	PAAQLPELPDVELPTNKDVCDPGNTK	Carbamidomethyl(C)@20	cleaved M-P@N-term; missed K-D@17	1	P02774
sp|P02774|VTDB_HUMAN	RSDFASNCCSINSPPLYCDSEIDAELK	Carbamidomethyl(C)@8; Carbamidomethyl(C)@9; Carbamidomethyl(C)@18	missed R-S@1	1	P02774
sp|P02774|VTDB_HUMAN	RSDFASNCCSINSPPLYCDSEIDAELKNIL	Carbamidomethyl(C)@8; Carbamidomethyl(C)@9; Carbamidomethyl(C)@18	missed R-S@1; missed K-N@27	1	P02774
sp|P02774|VTDB_HUMAN	RTHLPEVFLSK		missed R-T@1	1	P02774
sp|P02774|VTDB_HUMAN	SCESNSPFPVHPGTAECCTK	Carbamidomethyl(C)@2; Carbamidomethyl(C)@17; Carbamidomethyl(C)@18		1	P02774
sp|P02774|VTDB_HUMAN	SCESNSPFPVHPGTAECCTKEGLER	Carbamidomethyl(C)@2; Carbamidomethyl(C)@17; Carbamidomethyl(C)@18	missed K-E@20	1	P02774
sp|P02774|VTDB_HUMAN	SCESNSPFPVHPGTAECCTKEGLERK	Carbamidomethyl(C)@2; Carbamidomethyl(C)@17; Carbamidomethyl(C)@18	missed K-E@20; missed R-K@25	1	P02774
sp|P02774|VTDB_HUMAN	SDFASNCCSINSPPLYCDSEIDAELK	Carbamidomethyl(C)@7; Carbamidomethyl(C)@8; Carbamidomethyl(C)@17		1	P02774
sp|P02774|VTDB_HUMAN	SDFASNCCSINSPPLYCDSEIDAELKNIL	Carbamidomethyl(C)@7; Carbamidomethyl(C)@8; Carbamidomethyl(C)@17	missed K-N@26	1	P02774
sp|P02774|VTDB_HUMAN	SFIDKGQELCADYSENTFTEYKKK	Carbamidomethyl(C)@10	cleaved S-S@N-term; missed K-G@5; missed K-K@22; missed K-K@23	1	P02774
sp|P02774|VTDB_HUMAN	SGTFEQVSQLVK		cleaved P-S@N-term	1	P02774
sp|P02774|VTDB_HUMAN	SKCCESASEDCMAKELPEHTVK	Carbamidomethyl(C)@3; Carbamidomethyl(C)@4; Carbamidomethyl(C)@11	cleaved L-S@N-term; missed K-C@2; missed K-E@14	1	P02774
sp|P02774|VTDB_HUMAN	SLGECCDVEDSTTCFNAK	Carbamidomethyl(C)@5; Carbamidomethyl(C)@6; Carbamidomethyl(C)@14		1	P02774
sp|P02774|VTDB_HUMAN	SLGECCDVEDSTTCFNAKGPLLK	Carbamidomethyl(C)@5; Carbamidomethyl(C)@6; Carbamidomethyl(C)@14	missed K-G@18	1	P02774
sp|P02774|VTDB_HUMAN	SLGECCDVEDSTTCFNAKGPLLKK	Carbamidomethyl(C)@5; Carbamidomethyl(C)@6; Carbamidomethyl(C)@14	missed K-G@18; missed K-K@23	1	P02774
sp|P02774|VTDB_HUMAN	SPFPVHPGTAECCTK	Carbamidomethyl(C)@12; Carbamidomethyl(C)@13	cleaved N-S@N-term	1	P02774
sp|P02774|VTDB_HUMAN	SYLSMVGSCCTSASPTVCFLK	Carbamidomethyl(C)@9; Carbamidomethyl(C)@10; Carbamidomethyl(C)@18		1	P02774
sp|P02774|VTDB_HUMAN	SYLSMVGSCCTSASPTVCFLKER	Carbamidomethyl(C)@9; Carbamidomethyl(C)@10; Carbamidomethyl(C)@18	missed K-E@21	1	P02774
sp|P02774|VTDB_HUMAN	TAMDVFVCTY	Carbamidomethyl(C)@8	cleaved Y-F@C-term	1	P02774
sp|P02774|VTDB_HUMAN	THLPEVFLSK			1	P02774
sp|P02774|VTDB_HUMAN	TKVMDKYTFELSR		cleaved N-T@N-term; missed K-V@2; missed K-Y@6	1	P02774
sp|P02774|VTDB_HUMAN	TSALSAKSCESNSPFPVHPGTAECCTK	Carbamidomethyl(C)@9; Carbamidomethyl(C)@24; Carbamidomethyl(C)@25	missed K-S@7	1	P02774
sp|P02774|VTDB_HUMAN	TSALSAKSCESNSPFPVHPGTAECCTKEGLER	Carbamidomethyl(C)@9; Carbamidomethyl(C)@24; Carbamidomethyl(C)@25	missed K-S@7; missed K-E@27	1	P02774
sp|P02774|VTDB_HUMAN	VCSQYAAYGEK	Carbamidomethyl(C)@2		1	P02774
sp|P02774|VTDB_HUMAN	VCSQYAAYGEKK	Carbamidomethyl(C)@2	missed K-K@11	1	P02774
sp|P02774|VTDB_HUMAN	VLEPTLK			1	P02774
sp|P02774|VTDB_HUMAN	VLEPTLKSLGECCDVEDSTTCFNAK	Carbamidomethyl(C)@12; Carbamidomethyl(C)@13; Carbamidomethyl(C)@21	missed K-S@7	1	P02774
sp|P02774|VTDB_HUMAN	VLEPTLKSLGECCDVEDSTTCFNAKGPLLK	Carbamidomethyl(C)@12; Carbamidomethyl(C)@13; Carbamidomethyl(C)@21	missed K-S@7; missed K-G@25	1	P02774
sp|P02774|VTDB_HUMAN	VLEPTLKSLGECCDVEDSTTCFNAKGPLLKK	Carbamidomethyl(C)@12; Carbamidomethyl(C)@13; Carbamidomethyl(C)@21	missed K-S@7; missed K-G@25; missed K-K@30	1	P02774
sp|P02774|VTDB_HUMAN	VMDKYTFELSR		missed K-Y@4	1	P02774
sp|P02774|VTDB_HUMAN	VMDKYTFELSRR		missed K-Y@4; missed R-R@11	1	P02774
sp|P02774|VTDB_HUMAN	VPTADLEDVLPLAEDITNILSK			1	P02774
sp|P02774|VTDB_HUMAN	YTFELSR			1	P02774
sp|P02774|VTDB_HUMAN	YTFELSRR		missed R-R@7	1	P02774
sp|P02774|VTDB_HUMAN	KLCMAALKHQPQEFPTYVEPTNDEICEAFRK	Carbamidomethyl(C)@3; Deamidated(N)@22; Carbamidomethyl(C)@26	missed K-L@1; missed K-H@8; missed R-K@30	1	P02774
sp|P02774|VTDB_HUMAN	LAQKVPTADLED		cleaved D-V@C-term; missed K-V@4	1	P02774
sp|P02774|VTDB_HUMAN	VMDKYTFEL		cleaved L-S@C-term; missed K-Y@4	1	P02774
sp|P02774|VTDB_HUMAN	PDATPKELAK		cleaved L-P@N-term; missed K-E@6	1	P02774
sp|P02774|VTDB_HUMAN	SLGECCDVEDSTTCFNAKG	Carbamidomethyl(C)@5; Carbamidomethyl(C)@6; Carbamidomethyl(C)@14	cleaved G-P@C-term; missed K-G@18	1	P02774
sp|P02774|VTDB_HUMAN	TAMDVFVCTYFMPAAQLPELPDVELPTNKDVCDPGNTK	Dicarbamidomethyl(D)@4; Carbamidomethyl(C)@8; Carbamidomethyl(C)@32	missed K-D@29	1	P02774
sp|P02774|VTDB_HUMAN	LCADYSENTFTEYKK	Carbamidomethyl(C)@2	cleaved E-L@N-term; missed K-K@14	1	P02774
sp|P02774|VTDB_HUMAN	VMDKYTF		cleaved F-E@C-term; missed K-Y@4	1	P02774
sp|P02774|VTDB_HUMAN	ITNILSKCCESASEDCMAKELPEHTVK	Carbamidomethyl(C)@8; Carbamidomethyl(C)@9; Carbamidomethyl(C)@16	cleaved D-I@N-term; missed K-C@7; missed K-E@19	1	P02774
sp|P02774|VTDB_HUMAN	LPDATPK			1	P02774
sp|P02774|VTDB_HUMAN	LVLYSRKFPSGTFEQVSQLVK		cleaved S-L@N-term; missed R-K@6; missed K-F@7	1	P02774
sp|P02774|VTDB_HUMAN	SDFASNCCSIN	Carbamidomethyl(C)@7; Carbamidomethyl(C)@8; Dehydrated(S)@9	cleaved N-S@C-term	1	P02774
sp|P02774|VTDB_HUMAN	GKEDFTSLSLVLYSRKFPSGTFEQVSQLVK		cleaved L-G@N-term; missed K-E@2; missed R-K@15; missed K-F@16	1	P02774
sp|P02774|VTDB_HUMAN	LSNLIK	Formyl@N-term		35	Q5VZM2, O00629, Q13535, Q9UKJ0, Q8N6M8, Q7L523, P22459, P60033, Q9HB14, Q9NTG1, Q8NH19, Q96FE5, Q49A26, P32238, Q0VDD8, Q9UFC0, Q9Y233, Q15746, Q9Y2V7, O00231, O00255, Q7RTS7, Q96D09, Q8NGT0, Q9HCG7, P22748, O14617, P20700, Q8NEM0, P17020, nQ96DD0, Q9BXT8, P02774, Q92547, Q99439
sp|P02774|VTDB_HUMAN	SLVLYSRKFPSGTFEQVSQLVK	Formyl@N-term	cleaved L-S@N-term; missed R-K@7; missed K-F@8	1	P02774
sp|P02774|VTDB_HUMAN	THLPEVFLSKVLEPTLK		missed K-V@10	1	P02774
sp|P02774|VTDB_HUMAN	PFPVHPGTAECCTKEGLER	Carbamidomethyl(C)@11; Carbamidomethyl(C)@12	cleaved S-P@N-term; missed K-E@14	1	P02774
sp|P02774|VTDB_HUMAN	KLCMAALKHQPQEFPTYVEPTNDEICEAFRKDPK	Carbamidomethyl(C)@3; Carbamidomethyl(C)@26	missed K-L@1; missed K-H@8; missed R-K@30; missed K-D@31	1	P02774
sp|P02774|VTDB_HUMAN	GEKKSRLSNLIKLAQKVPTADLEDVLPLAEDITNILSK		cleaved Y-G@N-term; missed K-K@3; missed K-S@4; missed R-L@6; missed K-L@12; missed K-V@16	1	P02774
sp|P02774|VTDB_HUMAN	SRKFPSGTFEQVSQLVK	Oxidation(R)@2	cleaved Y-S@N-term; missed R-K@2; missed K-F@3	1	P02774
sp|P02774|VTDB_HUMAN	KLCMAALKHQPQEFPTYVEPTNDEICEAFRKD	Carbamidomethyl(C)@3; Carbamidomethyl(C)@26	cleaved D-P@C-term; missed K-L@1; missed K-H@8; missed R-K@30; missed K-D@31	1	P02774
sp|P02774|VTDB_HUMAN	LGECCDVEDSTTCFNAK	Carbamidomethyl(C)@4; Carbamidomethyl(C)@5; Carbamidomethyl(C)@13	cleaved S-L@N-term	1	P02774
sp|P02774|VTDB_HUMAN	PEVFLSK		cleaved L-P@N-term	1	P02774
sp|P02774|VTDB_HUMAN	EDFTSLSLVLYSRKFPSGTFEQVSQLVK	Carbamidomethyl@N-term; Octanoyl(S)@12	missed R-K@13; missed K-F@14	1	P02774
sp|P02774|VTDB_HUMAN	LCMAALKHQPQEFPTYVEPTNDEICEAFRKDPK	Carbamidomethyl(C)@2; Carbamidomethyl(C)@25	missed K-H@7; missed R-K@29; missed K-D@30	1	P02774
sp|P02774|VTDB_HUMAN	LKSLGECCDVEDSTTCFNAK	Acetyl@N-term; Carbamidomethyl(C)@7; Carbamidomethyl(C)@8; Carbamidomethyl(C)@16	cleaved T-L@N-term; missed K-S@2	1	P02774
sp|P02774|VTDB_HUMAN	PDVELPTNKDVCDPGNTK	GlyGly(T)@7; Deamidated(N)@8; Carbamidomethyl(C)@12	cleaved L-P@N-term; missed K-D@9	1	P02774
sp|P06727|APOA4_HUMAN	AKIDQNVEELKGR		missed K-I@2; missed K-G@11	1	P06727
sp|P06727|APOA4_HUMAN	ALVQQMEQLR			1	P06727
sp|P06727|APOA4_HUMAN	ALVQQMEQLRQK		missed R-Q@10	1	P06727
sp|P06727|APOA4_HUMAN	ARLLPHANEVSQK		missed R-L@2	1	P06727
sp|P06727|APOA4_HUMAN	DKVNSFFSTFK		missed K-V@2	1	P06727
sp|P06727|APOA4_HUMAN	DKVNSFFSTFKEK		missed K-V@2; missed K-E@11	1	P06727
sp|P06727|APOA4_HUMAN	DKVNSFFSTFKEKESQDK		missed K-V@2; missed K-E@11; missed K-E@13	1	P06727
sp|P06727|APOA4_HUMAN	DSEKLKEEIGKELEELR		missed K-L@4; missed K-E@6; missed K-E@11	1	P06727
sp|P06727|APOA4_HUMAN	DSEKLKEEIGKELEELRAR		missed K-L@4; missed K-E@6; missed K-E@11; missed R-A@17	1	P06727
sp|P06727|APOA4_HUMAN	EAVEHLQKSELTQQLNALFQDK		missed K-S@8	1	P06727
sp|P06727|APOA4_HUMAN	EKESQDKTLSLPELEQQQEQQQEQQQEQVQMLAPLES	Deamidated(Q)@30	missed K-E@2; missed K-T@7	1	P06727
sp|P06727|APOA4_HUMAN	ELQQRLEPYADQLR		missed R-L@5	1	P06727
sp|P06727|APOA4_HUMAN	ENADSLQASLRPHADELK			1	P06727
sp|P06727|APOA4_HUMAN	ENADSLQASLRPHADELKAK		missed K-A@18	1	P06727
sp|P06727|APOA4_HUMAN	ESQDKTLSLPELEQQQEQQQEQQQEQVQMLAPLES		missed K-T@5	1	P06727
sp|P06727|APOA4_HUMAN	GNLRGNTEGLQK		missed R-G@4	1	P06727
sp|P06727|APOA4_HUMAN	HAGDVEGHLSFLEK		cleaved P-H@N-term	1	P06727
sp|P06727|APOA4_HUMAN	HAGDVEGHLSFLEKDLR		cleaved P-H@N-term; missed K-D@14	1	P06727
sp|P06727|APOA4_HUMAN	IDQNVEELK			1	P06727
sp|P06727|APOA4_HUMAN	IDQNVEELKGR		missed K-G@9	1	P06727
sp|P06727|APOA4_HUMAN	IDQTVEELR			1	P06727
sp|P06727|APOA4_HUMAN	IDQTVEELRR		missed R-R@9	1	P06727
sp|P06727|APOA4_HUMAN	IGDNLRELQQR		missed R-E@6	1	P06727
sp|P06727|APOA4_HUMAN	ISASAEELR			1	P06727
sp|P06727|APOA4_HUMAN	ISASAEELRQR		missed R-Q@9	1	P06727
sp|P06727|APOA4_HUMAN	KLVPFATELHER		missed K-L@1	1	P06727
sp|P06727|APOA4_HUMAN	LAKDSEKLKEEIGKELEELR		missed K-D@3; missed K-L@7; missed K-E@9; missed K-E@14	1	P06727
sp|P06727|APOA4_HUMAN	LAKDSEKLKEEIGKELEELRAR		missed K-D@3; missed K-L@7; missed K-E@9; missed K-E@14; missed R-A@20	1	P06727
sp|P06727|APOA4_HUMAN	LAPLAEDVR			1	P06727
sp|P06727|APOA4_HUMAN	LAPLAEDVRGNLR		missed R-G@9	1	P06727
sp|P06727|APOA4_HUMAN	LAPLAEDVRGNLRGNTEGLQK		missed R-G@9; missed R-G@13	1	P06727
sp|P06727|APOA4_HUMAN	LEPYADQLR			1	P06727
sp|P06727|APOA4_HUMAN	LEPYADQLRTQVNTQAEQLR		missed R-T@9	1	P06727
sp|P06727|APOA4_HUMAN	LEPYADQLRTQVNTQAEQLRR		missed R-T@9; missed R-R@20	1	P06727
sp|P06727|APOA4_HUMAN	LGEVNTYAGDLQK			1	P06727
sp|P06727|APOA4_HUMAN	LGEVNTYAGDLQKK		missed K-K@13	1	P06727
sp|P06727|APOA4_HUMAN	LGPHAGDVEGHLSFLEK			1	P06727
sp|P06727|APOA4_HUMAN	LGPHAGDVEGHLSFLEKDLR		missed K-D@17	1	P06727
sp|P06727|APOA4_HUMAN	LKEEIGKELEELR		missed K-E@2; missed K-E@7	1	P06727
sp|P06727|APOA4_HUMAN	LKEEIGKELEELRAR		missed K-E@2; missed K-E@7; missed R-A@13	1	P06727
sp|P06727|APOA4_HUMAN	LLPHANEVSQK			1	P06727
sp|P06727|APOA4_HUMAN	LLPHANEVSQKIGDNLR		missed K-I@11	1	P06727
sp|P06727|APOA4_HUMAN	LLPHANEVSQKIGDNLRELQQR		missed K-I@11; missed R-E@17	1	P06727
sp|P06727|APOA4_HUMAN	LNHQLEGLTFQMK			1	P06727
sp|P06727|APOA4_HUMAN	LNHQLEGLTFQMKK		missed K-K@13	1	P06727
sp|P06727|APOA4_HUMAN	LTPYADEFK			1	P06727
sp|P06727|APOA4_HUMAN	LTPYADEFKVK		missed K-V@9	1	P06727
sp|P06727|APOA4_HUMAN	LVPFATELHER			1	P06727
sp|P06727|APOA4_HUMAN	PFATELHER		cleaved V-P@N-term	1	P06727
sp|P06727|APOA4_HUMAN	PLAEDVRGNLR		cleaved A-P@N-term; missed R-G@7	1	P06727
sp|P06727|APOA4_HUMAN	PYADEFKVK		cleaved T-P@N-term; missed K-V@7	1	P06727
sp|P06727|APOA4_HUMAN	QDKLGEVNTYAGDLQK	Trimethyl(K)@3; Deamidated(N)@8	cleaved F-Q@N-term; missed K-L@3	1	P06727
sp|P06727|APOA4_HUMAN	QDTQEKLNHQLEGLTFQMKK		cleaved A-Q@N-term; missed K-L@6; missed K-K@19	1	P06727
sp|P06727|APOA4_HUMAN	QKLGPHAGDVEGHLSFLEK	Gln->pyro-Glu@N-term	missed K-L@2	1	P06727
sp|P06727|APOA4_HUMAN	QLTPYAQR	Gln->pyro-Glu@N-term		1	P06727
sp|P06727|APOA4_HUMAN	QRLAPLAEDVR	Gln->pyro-Glu@N-term	missed R-L@2	1	P06727
sp|P06727|APOA4_HUMAN	RRVEPYGENFNK		missed R-R@1; missed R-V@2	1	P06727
sp|P06727|APOA4_HUMAN	RVEPYGENFNK		missed R-V@1	1	P06727
sp|P06727|APOA4_HUMAN	RVEPYGENFNKALVQQMEQLR	Deamidated(N)@10	missed R-V@1; missed K-A@11	1	P06727
sp|P06727|APOA4_HUMAN	RVEPYGENFNKALVQQMEQLRQK		missed R-V@1; missed K-A@11; missed R-Q@21	1	P06727
sp|P06727|APOA4_HUMAN	SELTQQLNALFQDK			1	P06727
sp|P06727|APOA4_HUMAN	SLAELGGHLDQQVEEFR			1	P06727
sp|P06727|APOA4_HUMAN	SLAELGGHLDQQVEEFRR		missed R-R@17	1	P06727
sp|P06727|APOA4_HUMAN	SLAELGGHLDQQVEEFRRR		missed R-R@17; missed R-R@18	1	P06727
sp|P06727|APOA4_HUMAN	SLAPYAQDTQEK			1	P06727
sp|P06727|APOA4_HUMAN	SLAPYAQDTQEKLNHQLEGLTFQMK		missed K-L@12	1	P06727
sp|P06727|APOA4_HUMAN	SLAPYAQDTQEKLNHQLEGLTFQMKK		missed K-L@12; missed K-K@25	1	P06727
sp|P06727|APOA4_HUMAN	VEPYGENFNK			1	P06727
sp|P06727|APOA4_HUMAN	VEPYGENFNKALVQQMEQLR		missed K-A@10	1	P06727
sp|P06727|APOA4_HUMAN	VEPYGENFNKALVQQMEQLRQK		missed K-A@10; missed R-Q@20	1	P06727
sp|P06727|APOA4_HUMAN	VKIDQTVEELR		missed K-I@2	1	P06727
sp|P06727|APOA4_HUMAN	VKIDQTVEELRR		missed K-I@2; missed R-R@11	1	P06727
sp|P06727|APOA4_HUMAN	VLRENADSLQASLRPHADELK		missed R-E@3	1	P06727
sp|P06727|APOA4_HUMAN	VLRENADSLQASLRPHADELKAK		missed R-E@3; missed K-A@21	1	P06727
sp|P06727|APOA4_HUMAN	VLRENADSLQASLRPHADELKAKIDQNVEELKGR		missed R-E@3; missed K-A@21; missed K-I@23; missed K-G@32	1	P06727
sp|P06727|APOA4_HUMAN	VNSFFSTFK			1	P06727
sp|P06727|APOA4_HUMAN	VNSFFSTFKEK		missed K-E@9	1	P06727
sp|P06727|APOA4_HUMAN	IDQNVEELKGRLTPYADEFKVK		missed K-G@9; missed R-L@11; missed K-V@20	1	P06727
sp|P06727|APOA4_HUMAN	PHANEVSQK		cleaved L-P@N-term	1	P06727
sp|P06727|APOA4_HUMAN	QRLAPLAEDVRGNLR	Gln->pyro-Glu@N-term	missed R-L@2; missed R-G@11	1	P06727
sp|P06727|APOA4_HUMAN	QKLGPHAGDVEGHLSFLEKDLR	Gln->pyro-Glu@N-term	missed K-L@2; missed K-D@19	1	P06727
sp|P06727|APOA4_HUMAN	ATELHER		cleaved F-A@N-term	1	P06727
sp|P06727|APOA4_HUMAN	TLSLPELEQQQEQQQEQQQEQVQMLAPLES			1	P06727
sp|P06727|APOA4_HUMAN	KSLAELGGHLDQQVEEFRR	Acetyl@N-term	cleaved Q-K@N-term; missed K-S@1; missed R-R@18	1	P06727
sp|P06727|APOA4_HUMAN	TQVNTQAEQLRR		missed R-R@11	1	P06727
sp|P06727|APOA4_HUMAN	ELQQRLEPYADQLRTQVNTQAEQLRR		missed R-L@5; missed R-T@14; missed R-R@25	1	P06727
sp|P06727|APOA4_HUMAN	PHADELKAKIDQNVEELKGRLTPYADEFKVK		cleaved R-P@N-term; missed K-A@7; missed K-I@9; missed K-G@18; missed R-L@20; missed K-V@29	1	P06727
sp|P06727|APOA4_HUMAN	LAPLAEDVRGN		cleaved N-L@C-term; missed R-G@9	1	P06727
sp|P06727|APOA4_HUMAN	LRGNTEGLQK	Deamidated(Q)@9	cleaved N-L@N-term; missed R-G@2	1	P06727
sp|P06727|APOA4_HUMAN	FATELHER		cleaved P-F@N-term	1	P06727
sp|P06727|APOA4_HUMAN	SLAELGGHLDQQVEEFRRRVE		cleaved E-P@C-term; missed R-R@17; missed R-R@18; missed R-V@19	1	P06727
sp|P06727|APOA4_HUMAN	RSLAPYAQDTQEKLNHQLEGLTFQMKK	Carbamidomethyl@N-term	missed R-S@1; missed K-L@13; missed K-K@26	1	P06727
sp|P06727|APOA4_HUMAN	GRLTPYADEFKVK		missed R-L@2; missed K-V@11	1	P06727
sp|P06727|APOA4_HUMAN	GNTEGLQKSLAELGGHLDQQVEEFR	Carbamyl(K)@8	missed K-S@8	1	P06727
sp|P06727|APOA4_HUMAN	GRLTPYADEFK	Deamidated(R)@2	missed R-L@2	1	P06727
sp|P06727|APOA4_HUMAN	QKKLVPFATELHER	Gln->pyro-Glu@N-term	cleaved L-Q@N-term; missed K-K@2; missed K-L@3	1	P06727
sp|P00738|HPT_HUMAN	ALLLWGQLFAVDSGNDVTDIADDGCPKPPEIAHGYVEHSVR	Trp->Kynurenin(W)@5; Carbamidomethyl(C)@25	cleaved I-A@N-term	1	P00738
sp|P00738|HPT_HUMAN	AVGDKLPECEADDGCPKPPEIAHGYVEHSVR	Carbamidomethyl(C)@9; Carbamidomethyl(C)@15	missed K-L@5	1	P00738
sp|P00738|HPT_HUMAN	AVGDKLPECEAVCGK	Carbamidomethyl(C)@9; Carbamidomethyl(C)@13	cleaved K-P@C-term; missed K-L@5	2	P00738, P00739
sp|P00738|HPT_HUMAN	AVGDKLPECEAVCGKPK	Carbamidomethyl(C)@9; Carbamidomethyl(C)@13	missed K-L@5	2	P00738, P00739
sp|P00738|HPT_HUMAN	AVGDKLPECEAVCGKPKNPAN	Carbamidomethyl(C)@9; Carbamidomethyl(C)@13	cleaved N-P@C-term; missed K-L@5; missed K-N@17	2	P00738, P00739
sp|P00738|HPT_HUMAN	AVGDKLPECEAVCGKPKNPANPV	Carbamidomethyl(C)@9; Carbamidomethyl(C)@13	cleaved V-Q@C-term; missed K-L@5; missed K-N@17	2	P00738, P00739
sp|P00738|HPT_HUMAN	AVGDKLPECEAVCGKPKNPANPVQ	Carbamidomethyl(C)@9; Carbamidomethyl(C)@13	cleaved Q-R@C-term; missed K-L@5; missed K-N@17	2	P00738, P00739
sp|P00738|HPT_HUMAN	AVGDKLPECEAVCGKPKNPANPVQR	Carbamidomethyl(C)@9; Carbamidomethyl(C)@13	missed K-L@5; missed K-N@17	2	P00738, P00739
sp|P00738|HPT_HUMAN	DIAPTLTLYVGK			2	P00738, P00739
sp|P00738|HPT_HUMAN	DIAPTLTLYVGKK		missed K-K@12	2	P00738, P00739
sp|P00738|HPT_HUMAN	DVTDIADDGCPKPPEIAHGYVEHSVR	Carbamidomethyl(C)@10	cleaved N-D@N-term	1	P00738
sp|P00738|HPT_HUMAN	FTDHLK			1	P00738
sp|P00738|HPT_HUMAN	GDKLPECEAVCGKPK	Carbamidomethyl(C)@7; Carbamidomethyl(C)@11	cleaved V-G@N-term; missed K-L@3	2	P00738, P00739
sp|P00738|HPT_HUMAN	GNDVTDIADDGCPKPPEIAHGYVEHSVR	Carbamidomethyl(C)@12	cleaved S-G@N-term	1	P00738
sp|P00738|HPT_HUMAN	GSFPWQAK			2	P00738, P00739
sp|P00738|HPT_HUMAN	HYEGSTVPEKK		missed K-K@10	1	P00738
sp|P00738|HPT_HUMAN	IALLLWGQLFAVDSGNDVTDIADDGCPKPPEIAHGYVEHSVR	Carbamidomethyl(C)@26	cleaved V-I@N-term	1	P00738
sp|P00738|HPT_HUMAN	ILGGHLDAK			2	P00738, P00739
sp|P00738|HPT_HUMAN	KSPVGVQPILNEHTFCAGMSK	Acetyl@N-term; Carbamidomethyl(C)@16	cleaved P-K@N-term; missed K-S@1	2	P00738, P00739
sp|P00738|HPT_HUMAN	LPECEADDGCPKPPEIAHGYVEHSVR	Carbamidomethyl(C)@4; Carbamidomethyl(C)@10		1	P00738
sp|P00738|HPT_HUMAN	LPECEAVCGKPK	Carbamidomethyl(C)@4; Carbamidomethyl(C)@8		2	P00738, P00739
sp|P00738|HPT_HUMAN	LPECEAVCGKPKNPANPVQR	Carbamidomethyl(C)@4; Carbamidomethyl(C)@8	missed K-N@12	2	P00738, P00739
sp|P00738|HPT_HUMAN	LRTEGDGVYTLNDK		missed R-T@2	2	P00738, P00739
sp|P00738|HPT_HUMAN	LRTEGDGVYTLNDKK		missed R-T@2; missed K-K@14	2	P00738, P00739
sp|P00738|HPT_HUMAN	LRTEGDGVYTLNDKKQWINK		missed R-T@2; missed K-K@14; missed K-Q@15	2	P00738, P00739
sp|P00738|HPT_HUMAN	LRTEGDGVYTLNNEK		missed R-T@2	1	P00738
sp|P00738|HPT_HUMAN	LRTEGDGVYTLNNEKQWINK		missed R-T@2; missed K-Q@15	1	P00738
sp|P00738|HPT_HUMAN	LRTEGDGVYTLNNEKQWINKAVGDKLPECEAVCGKPK	Carbamidomethyl(C)@29; Carbamidomethyl(C)@33	missed R-T@2; missed K-Q@15; missed K-A@20; missed K-L@25	1	P00738
sp|P00738|HPT_HUMAN	LRTEGDGVYTLNNEKQWINKAVGDKLPECEAVCGKPKNPANPVQ	Carbamidomethyl(C)@29; Carbamidomethyl(C)@33	cleaved Q-R@C-term; missed R-T@2; missed K-Q@15; missed K-A@20; missed K-L@25; missed K-N@37	1	P00738
sp|P00738|HPT_HUMAN	LRTEGDGVYTLNNEKQWINKAVGDKLPECEAVCGKPKNPANPVQR	Deamidated(N)@19; Carbamidomethyl(C)@29; Carbamidomethyl(C)@33	missed R-T@2; missed K-Q@15; missed K-A@20; missed K-L@25; missed K-N@37	1	P00738
sp|P00738|HPT_HUMAN	LWGQLFAVDSGNDVTDIADDGCPKPPEIAHGYVEHSVR	Deamidated(N)@12; Carbamidomethyl(C)@22	cleaved L-L@N-term	1	P00738
sp|P00738|HPT_HUMAN	NANFKFTDHLK		missed K-F@5	1	P00738
sp|P00738|HPT_HUMAN	NDKKQWINKAVGDKLPECEADDGCPKPPEIAHGYVEHSVR	Carbamidomethyl(C)@18; Carbamidomethyl(C)@24	cleaved L-N@N-term; missed K-K@3; missed K-Q@4; missed K-A@9; missed K-L@14	1	P00738
sp|P00738|HPT_HUMAN	NDVTDIADDGCPKPPEIAHGYVEHSVR	Carbamidomethyl(C)@11	cleaved G-N@N-term	1	P00738
sp|P00738|HPT_HUMAN	NKAVGDKLPECEADDGCPKPPEIAHGYVEHSVR	Carbamidomethyl(C)@11; Carbamidomethyl(C)@17	cleaved I-N@N-term; missed K-A@2; missed K-L@7	1	P00738
sp|P00738|HPT_HUMAN	PICLPSKDYAEVGR	Carbamidomethyl(C)@3	cleaved M-P@N-term; missed K-D@7	2	P00738, P00739
sp|P00738|HPT_HUMAN	PSKDYAEVGR		cleaved L-P@N-term; missed K-D@3	2	P00738, P00739
sp|P00738|HPT_HUMAN	QKVSVNER	Gln->pyro-Glu@N-term	missed K-V@2	1	P00738
sp|P00738|HPT_HUMAN	QLVEIEK	Gln->pyro-Glu@N-term		6	P31249, P14651, P00738, P00739, O43365, P52951
sp|P00738|HPT_HUMAN	QWINKAVGDKLPECEADDGCPKPPEIAHGYVEHSVR	Trioxidation(W)@2; Oxidation(P)@12; Carbamidomethyl(C)@14; Carbamidomethyl(C)@20	missed K-A@5; missed K-L@10	1	P00738
sp|P00738|HPT_HUMAN	QWINKAVGDKLPECEAVCGKPK	Gln->pyro-Glu@N-term; Carbamidomethyl(C)@14; Carbamidomethyl(C)@18	missed K-A@5; missed K-L@10	2	P00738, P00739
sp|P00738|HPT_HUMAN	QWINKAVGDKLPECEAVCGKPKNPANPVQ	Carbamidomethyl(C)@14; Carbamidomethyl(C)@18	cleaved Q-R@C-term; missed K-A@5; missed K-L@10; missed K-N@22	2	P00738, P00739
sp|P00738|HPT_HUMAN	SCAVAEYGVYVK	Carbamidomethyl(C)@2		2	P00738, P00739
sp|P00738|HPT_HUMAN	SGNDVTDIADDGCPKPPEIAHGYVEHSVR	Carbamidomethyl(C)@13	cleaved D-S@N-term	1	P00738
sp|P00738|HPT_HUMAN	SIQDWVQK		cleaved T-S@N-term	2	P00738, P00739
sp|P00738|HPT_HUMAN	SPVGVQPILNEHTF		cleaved F-C@C-term	2	P00738, P00739
sp|P00738|HPT_HUMAN	SPVGVQPILNEHTFCAGMSK	Carbamidomethyl(C)@15		2	P00738, P00739
sp|P00738|HPT_HUMAN	TEGDGVYTLNDK			2	P00738, P00739
sp|P00738|HPT_HUMAN	TEGDGVYTLNDKK		missed K-K@12	2	P00738, P00739
sp|P00738|HPT_HUMAN	TEGDGVYTLNDKKQWINK		missed K-K@12; missed K-Q@13	2	P00738, P00739
sp|P00738|HPT_HUMAN	TEGDGVYTLNNEK			1	P00738
sp|P00738|HPT_HUMAN	TEGDGVYTLNNEKQWINK		missed K-Q@13	1	P00738
sp|P00738|HPT_HUMAN	TEGDGVYTLNNEKQWINKAVGDKLPECEAVCGKPK	Carbamidomethyl(C)@27; Carbamidomethyl(C)@31	missed K-Q@13; missed K-A@18; missed K-L@23	1	P00738
sp|P00738|HPT_HUMAN	TPKSPVGVQPILNEHTFCAGMSK	Carbamidomethyl(C)@18	missed K-S@3	1	P00738
sp|P00738|HPT_HUMAN	VDSGNDVTDIADDGCPKPPEIAHGYVEHSVR	Carbamidomethyl(C)@15	cleaved A-V@N-term	1	P00738
sp|P00738|HPT_HUMAN	VDSGNDVTDIADDGCPKPPEIAHGYVEHSVRYQCK	Carbamidomethyl(C)@15; Carbamidomethyl(C)@34	cleaved A-V@N-term; missed R-Y@31	1	P00738
sp|P00738|HPT_HUMAN	VGDKLPECEADDGCPKPPEIAHGYVEHSVR	Carbamidomethyl(C)@8; Carbamidomethyl(C)@14	cleaved A-V@N-term; missed K-L@4	1	P00738
sp|P00738|HPT_HUMAN	VGVQPILNEHTFCAGMSK	Carbamidomethyl(C)@13	cleaved P-V@N-term	2	P00738, P00739
sp|P00738|HPT_HUMAN	VGYVSGWGR			2	P00738, P00739
sp|P00738|HPT_HUMAN	VGYVSGWGRNANFK	Deamidated(N)@10	missed R-N@9	1	P00738
sp|P00738|HPT_HUMAN	VMPICLPSK	Carbamidomethyl(C)@5		2	P00738, P00739
sp|P00738|HPT_HUMAN	VMPICLPSKDYAEVGR	Carbamidomethyl(C)@5	missed K-D@9	2	P00738, P00739
sp|P00738|HPT_HUMAN	VSVNERVMPICLPSKDYAEVGR	Carbamidomethyl(C)@11	missed R-V@6; missed K-D@15	1	P00738
sp|P00738|HPT_HUMAN	VTSIQDWVQK			2	P00738, P00739
sp|P00738|HPT_HUMAN	VVLHPNYSQVDIGLIK			1	P00738
sp|P00738|HPT_HUMAN	YVMLPVADQDQCIR	Carbamidomethyl(C)@12		1	P00738
sp|P00738|HPT_HUMAN	YVMLPVADQDQCIRHYEGSTVPEK	Carbamidomethyl(C)@12	missed R-H@14	1	P00738
sp|P00738|HPT_HUMAN	YVMLPVADQDQCIRHYEGSTVPEKK	Carbamidomethyl(C)@12	missed R-H@14; missed K-K@24	1	P00738
sp|P00738|HPT_HUMAN	QKVSVNERVMPICLPSKDYAEVGR	Carbamidomethyl(C)@13	missed K-V@2; missed R-V@8; missed K-D@17	1	P00738
sp|P00738|HPT_HUMAN	AVGDKLPECEADDGCPKPPEIAHGYVEHSVRYQCK	Carbamidomethyl(C)@9; Carbamidomethyl(C)@15; Carbamidomethyl(C)@34	missed K-L@5; missed R-Y@31	1	P00738
sp|P00738|HPT_HUMAN	LPECEAVCGKPKNPANPVQ	Carbamidomethyl(C)@4; Carbamidomethyl(C)@8	cleaved Q-R@C-term; missed K-N@12	2	P00738, P00739
sp|P00738|HPT_HUMAN	LPVADQDQCIR	Carbamidomethyl(C)@9	cleaved M-L@N-term	1	P00738
sp|P00738|HPT_HUMAN	TEGDGVYTLNDKKQWINKAVGDKLPECEADDGCPKPPEIAHGYVEHSVR	Deamidated(N)@17; Carbamidomethyl(C)@27; Carbamidomethyl(C)@33	missed K-K@12; missed K-Q@13; missed K-A@18; missed K-L@23	1	P00738
sp|P00738|HPT_HUMAN	RVMPICLPSKDYAEVGR	Carbamidomethyl@N-term; Carbamidomethyl(C)@6	cleaved E-R@N-term; missed R-V@1; missed K-D@10	2	P00738, P00739
sp|P00738|HPT_HUMAN	TEGDGVYTLNNEKQWINKAVGDKLPECEAVCGKPKNPANPVQR	Carbamidomethyl(C)@27; Carbamidomethyl(C)@31	missed K-Q@13; missed K-A@18; missed K-L@23; missed K-N@35	1	P00738
sp|P00738|HPT_HUMAN	NNEKQWINK	Dioxidation(W)@6	cleaved L-N@N-term; missed K-Q@4	1	P00738
sp|P00738|HPT_HUMAN	YVMLPVADQDQCIRHYEGSTVPEKKTPK	Carbamidomethyl(C)@12	missed R-H@14; missed K-K@24; missed K-T@25	1	P00738
sp|P00738|HPT_HUMAN	FTDHLKYVMLPVADQDQCIR	Carbamidomethyl@N-term; Carbamidomethyl(C)@18	missed K-Y@6	1	P00738
sp|P00738|HPT_HUMAN	AVDSGNDVTDIADDGCPKPPEIAHGYVEHSVR	Methyl(D)@13; Carbamidomethyl(C)@16	cleaved F-A@N-term	1	P00738
sp|P00738|HPT_HUMAN	EKQWINKAVGDKLPECEAVCGKPK	Carbamidomethyl(C)@16; Carbamidomethyl(C)@20	cleaved N-E@N-term; missed K-Q@2; missed K-A@7; missed K-L@12	1	P00738
sp|P00738|HPT_HUMAN	TEGDGVYTLNNE		cleaved E-K@C-term	1	P00738
sp|P00738|HPT_HUMAN	LKYVMLPVADQDQCIR	Oxidation(Y)@3; Carbamidomethyl(C)@14	cleaved H-L@N-term; missed K-Y@2	1	P00738
sp|P00738|HPT_HUMAN	GYVSGWGR		cleaved V-G@N-term	3	P00738, P00739, P00740
sp|P00738|HPT_HUMAN	VGVQPILNEHTF		cleaved P-V@N-term; cleaved F-C@C-term	2	P00738, P00739
sp|P00738|HPT_HUMAN	NFKFTDHLKYVMLPVADQDQCIR	Carbamidomethyl(C)@21	cleaved A-N@N-term; missed K-F@3; missed K-Y@9	1	P00738
sp|P00738|HPT_HUMAN	MLPVADQDQCIR	Carbamidomethyl(C)@10	cleaved V-M@N-term	1	P00738
sp|P00738|HPT_HUMAN	YTLNDKKQWINKAVGDKLPECEADDGCPKPPEIAHGYVEHSVR	Carbamidomethyl(C)@21; Carbamidomethyl(C)@27	cleaved V-Y@N-term; missed K-K@6; missed K-Q@7; missed K-A@12; missed K-L@17	1	P00738
sp|P00738|HPT_HUMAN	AVGDKLPECEAVCGKP	Carbamidomethyl(C)@9; Carbamidomethyl(C)@13	cleaved P-K@C-term; missed K-L@5	2	P00738, P00739
sp|P00738|HPT_HUMAN	LPSKDYAEVGR		cleaved C-L@N-term; missed K-D@4	2	P00738, P00739
sp|P00738|HPT_HUMAN	KPPEIAHGYVEHSVR		cleaved P-K@N-term	1	P00738
sp|P00738|HPT_HUMAN	YQCKNYYKLRTEGDGVYTLNNEK	Carbamidomethyl(C)@3; Cation:Na(E)@12	missed K-N@4; missed K-L@8; missed R-T@10	1	P00738
sp|P00738|HPT_HUMAN	NNEKQWINKAVGDKLPECEAVCGKPK	Deamidated(N)@8; Carbamidomethyl(C)@18; Carbamidomethyl(C)@22	cleaved L-N@N-term; missed K-Q@4; missed K-A@9; missed K-L@14	1	P00738
sp|P00738|HPT_HUMAN	VTDIADDGCPKPPEIAHGYVEHSVR	Carbamidomethyl(C)@9	cleaved D-V@N-term	1	P00738
sp|P00738|HPT_HUMAN	DDGCPKPPEIAHGYVEHSVR	Acetyl@N-term; Carbamidomethyl(C)@4	cleaved A-D@N-term	1	P00738
sp|P00738|HPT_HUMAN	ADDGCPKPPEIAHGYVEHSVR	Carbamidomethyl(C)@5	cleaved I-A@N-term	1	P00738
sp|P00738|HPT_HUMAN	DYAEVGRVGYVSGWGRNANFKFTDHLKYVMLPVADQDQCIR	Dioxidation(W)@14; Oxidation(M)@30; Carbamidomethyl(C)@39	missed R-V@7; missed R-N@16; missed K-F@21; missed K-Y@27	1	P00738
sp|P00738|HPT_HUMAN	KYVMLPVADQDQCIR	Trimethyl(K)@1; Carbamidomethyl(C)@13	cleaved L-K@N-term; missed K-Y@1	1	P00738
sp|P00738|HPT_HUMAN	FAVDSGNDVTDIADDGCPKPPEIAHGYVEHSVR	Phospho(S)@5; Carbamidomethyl(C)@17	cleaved L-F@N-term	1	P00738
sp|P00738|HPT_HUMAN	LFAVDSGNDVTDIADDGCPKPPEIAHGYVEHSVR	Dehydrated(T)@11; Carbamidomethyl(C)@18	cleaved Q-L@N-term	1	P00738
sp|P00738|HPT_HUMAN	NDKKQWINK	Dioxidation(W)@6	cleaved L-N@N-term; missed K-K@3; missed K-Q@4	2	P00738, P00739
sp|P00738|HPT_HUMAN	TDIADDGCPKPPEIAHGYVEHSVR	Oxidation(D)@2; Carbamidomethyl(C)@8	cleaved V-T@N-term	1	P00738
sp|P00738|HPT_HUMAN	TEGDGVYTLNDKKQWINKAVG	Oxidation(W)@15; Delta:H(2)C(2)(K)@18	cleaved G-D@C-term; missed K-K@12; missed K-Q@13; missed K-A@18	2	P00738, P00739
sp|P01042|KNG1_HUMAN	AATGECTATVGKR	Carbamidomethyl(C)@6	missed K-R@12	1	P01042
sp|P01042|KNG1_HUMAN	AGKKYFIDFVAR		cleaved V-A@N-term; missed K-K@3; missed K-Y@4	1	P01042
sp|P01042|KNG1_HUMAN	AVDAALKK		missed K-K@7	2	O15020, P01042
sp|P01042|KNG1_HUMAN	AVDAALKKYNSQNQSNNQFVLYR		missed K-K@7; missed K-Y@8	1	P01042
sp|P01042|KNG1_HUMAN	CPRDIPTNSPELEETLTHTITK	Carbamidomethyl(C)@1; Deamidated(N)@8; Oxidation(P)@10	cleaved G-C@N-term; missed R-D@3	1	P01042
sp|P01042|KNG1_HUMAN	DCNDKDLFKAVDAALK	Carbamidomethyl(C)@2	cleaved I-D@N-term; missed K-D@5; missed K-A@9	1	P01042
sp|P01042|KNG1_HUMAN	DIPTNSPELEETLTHTITK			1	P01042
sp|P01042|KNG1_HUMAN	EGDCPVQSGKTWQDCEYKDAAK	Carbamidomethyl(C)@4; Carbamidomethyl(C)@15	missed K-T@10; missed K-D@18	1	P01042
sp|P01042|KNG1_HUMAN	EGDCPVQSGKTWQDCEYKDAAKAATGECTATVGKR	Carbamidomethyl(C)@4; Carbamidomethyl(C)@15; Carbamidomethyl(C)@28	missed K-T@10; missed K-D@18; missed K-A@22; missed K-R@34	1	P01042
sp|P01042|KNG1_HUMAN	ENFLFLTPDCK	Carbamidomethyl(C)@10		1	P01042
sp|P01042|KNG1_HUMAN	ETTCSKESNEELTESCETK	Carbamidomethyl(C)@4; Carbamidomethyl(C)@16	missed K-E@6	1	P01042
sp|P01042|KNG1_HUMAN	ETTCSKESNEELTESCETKK	Carbamidomethyl(C)@4; Carbamidomethyl(C)@16	missed K-E@6; missed K-K@19	1	P01042
sp|P01042|KNG1_HUMAN	ETTCSKESNEELTESCETKKLGQSLDCNAEVYVVPWEK	Carbamidomethyl(C)@4; Carbamidomethyl(C)@16; Phospho(S)@24; Carbamidomethyl(C)@27	missed K-E@6; missed K-K@19; missed K-L@20	1	P01042
sp|P01042|KNG1_HUMAN	FIDFVAR		cleaved Y-F@N-term	1	P01042
sp|P01042|KNG1_HUMAN	FKLDDDLEHQGGHVLDHGHK		missed K-L@2	1	P01042
sp|P01042|KNG1_HUMAN	FLFLTPDCK	Carbamidomethyl(C)@8	cleaved N-F@N-term	1	P01042
sp|P01042|KNG1_HUMAN	FSVATQTCQITPAEGPVVTAQYDCLGCVHPISTQSPDLEPILR	Carbamidomethyl(C)@8; Carbamidomethyl(C)@24; Carbamidomethyl(C)@27		1	P01042
sp|P01042|KNG1_HUMAN	GFSPFR		cleaved P-G@N-term	2	P01042, Q9C098
sp|P01042|KNG1_HUMAN	GLSFNPISDFPDTTSPK		cleaved N-G@N-term	1	P01042
sp|P01042|KNG1_HUMAN	IASFSQNCDIYPGK	Carbamidomethyl(C)@8		1	P01042
sp|P01042|KNG1_HUMAN	IASFSQNCDIYPGKDFVQPPTK	Carbamidomethyl(C)@8	missed K-D@14	1	P01042
sp|P01042|KNG1_HUMAN	IASFSQNCDIYPGKDFVQPPTKICVGCPR	Carbamidomethyl(C)@8; Carbamidomethyl(C)@24; Carbamidomethyl(C)@27	missed K-D@14; missed K-I@22	1	P01042
sp|P01042|KNG1_HUMAN	ICVGCPR	Carbamidomethyl@N-term; Carbamidomethyl(C)@2; Carbamidomethyl(C)@5		1	P01042
sp|P01042|KNG1_HUMAN	ITEATKTVGSDTFYSFK		missed K-T@6	1	P01042
sp|P01042|KNG1_HUMAN	ITEATKTVGSDTFYSFKYEIKEGDCPVQSGK	Carbamidomethyl(C)@25	missed K-T@6; missed K-Y@17; missed K-E@21	1	P01042
sp|P01042|KNG1_HUMAN	IYPTVNCQPLGMISLMK	Carbamidomethyl(C)@7		1	P01042
sp|P01042|KNG1_HUMAN	KIYPTVNCQPLGMISL	Carbamidomethyl(C)@8	cleaved L-M@C-term; missed K-I@1	1	P01042
sp|P01042|KNG1_HUMAN	KIYPTVNCQPLGMISLMK	Carbamidomethyl(C)@8	missed K-I@1	1	P01042
sp|P01042|KNG1_HUMAN	KLGQSLDCNAEVYVVPWEK	Carbamidomethyl(C)@8	missed K-L@1	1	P01042
sp|P01042|KNG1_HUMAN	KLGQSLDCNAEVYVVPWEKK	Carbamidomethyl(C)@8	missed K-L@1; missed K-K@19	1	P01042
sp|P01042|KNG1_HUMAN	KYFIDFVAR		missed K-Y@1	1	P01042
sp|P01042|KNG1_HUMAN	KYNSQNQSNNQFVLYR		missed K-Y@1	1	P01042
sp|P01042|KNG1_HUMAN	LDDDLEHQGGHVLDHGHK			1	P01042
sp|P01042|KNG1_HUMAN	LGQSLDCNAEVYVVPWEK	Carbamidomethyl(C)@7		1	P01042
sp|P01042|KNG1_HUMAN	LGQSLDCNAEVYVVPWEKK	Carbamidomethyl(C)@7	missed K-K@18	1	P01042
sp|P01042|KNG1_HUMAN	LTQESQSEEIDCNDKDLFKAVDAALKK	Carbamidomethyl(C)@12	cleaved S-L@N-term; missed K-D@15; missed K-A@19; missed K-K@26	1	P01042
sp|P01042|KNG1_HUMAN	PGFSPFR		cleaved P-P@N-term	1	P01042
sp|P01042|KNG1_HUMAN	PISDFPDTTSPK		cleaved N-P@N-term	1	P01042
sp|P01042|KNG1_HUMAN	PNGLSFNPISDFPDTTSPK		cleaved D-P@N-term	1	P01042
sp|P01042|KNG1_HUMAN	PRDIPTNSPELEETLTHTITK		cleaved C-P@N-term; missed R-D@2	1	P01042
sp|P01042|KNG1_HUMAN	PWEKKIYPTVNCQPLGMISLMK	Carbamidomethyl(C)@12	cleaved V-P@N-term; missed K-K@4; missed K-I@5	1	P01042
sp|P01042|KNG1_HUMAN	QESQSEEIDCNDKDLFK	Gln->pyro-Glu@N-term; Carbamidomethyl(C)@10	cleaved T-Q@N-term; missed K-D@13	1	P01042
sp|P01042|KNG1_HUMAN	QESQSEEIDCNDKDLFKAVDAALK	Gln->pyro-Glu@N-term; Carbamidomethyl(C)@10	cleaved T-Q@N-term; missed K-D@13; missed K-A@17	1	P01042
sp|P01042|KNG1_HUMAN	QESQSEEIDCNDKDLFKAVDAALKK	Gln->pyro-Glu@N-term; Carbamidomethyl(C)@10	cleaved T-Q@N-term; missed K-D@13; missed K-A@17; missed K-K@24	1	P01042
sp|P01042|KNG1_HUMAN	QSNNQFVLYR		cleaved N-Q@N-term	1	P01042
sp|P01042|KNG1_HUMAN	QVVAGLNFR	Gln->pyro-Glu@N-term		1	P01042
sp|P01042|KNG1_HUMAN	RDIPTNSPELEETLTHTITK	Carbamyl@N-term; Oxidation(D)@2	cleaved P-R@N-term; missed R-D@1	1	P01042
sp|P01042|KNG1_HUMAN	RPPGFSPF		cleaved F-R@C-term	1	P01042
sp|P01042|KNG1_HUMAN	RPPGFSPFR			1	P01042
sp|P01042|KNG1_HUMAN	SDTFYSFK		cleaved G-S@N-term	1	P01042
sp|P01042|KNG1_HUMAN	SDTFYSFKYEIK		cleaved G-S@N-term; missed K-Y@8	1	P01042
sp|P01042|KNG1_HUMAN	SFSQNCDIYPGKDFVQPPTK	Carbamidomethyl(C)@6	cleaved A-S@N-term; missed K-D@12	1	P01042
sp|P01042|KNG1_HUMAN	SQNQSNNQFVLYR		cleaved N-S@N-term	1	P01042
sp|P01042|KNG1_HUMAN	SSTKFSVATQTCQITPAEGPVVTAQYDCLGCVHPISTQSPDLEPILR	Carbamidomethyl(C)@12; Deamidated(Q)@25; Carbamidomethyl(C)@28; Carbamidomethyl(C)@31	missed K-F@4	1	P01042
sp|P01042|KNG1_HUMAN	TVGSDTFYSFK			1	P01042
sp|P01042|KNG1_HUMAN	TVGSDTFYSFKYEIK		missed K-Y@11	1	P01042
sp|P01042|KNG1_HUMAN	TVGSDTFYSFKYEIKEGDCPVQSGK	Carbamidomethyl(C)@19	missed K-Y@11; missed K-E@15	1	P01042
sp|P01042|KNG1_HUMAN	TVGSDTFYSFKYEIKEGDCPVQSGKTWQDCEYKDAAK	Carbamidomethyl(C)@19; Carbamidomethyl(C)@30	missed K-Y@11; missed K-E@15; missed K-T@25; missed K-D@33	1	P01042
sp|P01042|KNG1_HUMAN	TWQDCEYKDAAK	Carbamidomethyl(C)@5	missed K-D@8	1	P01042
sp|P01042|KNG1_HUMAN	TWQDCEYKDAAKAATGECTATVGKR	Carbamidomethyl(C)@5; Carbamidomethyl(C)@18	missed K-D@8; missed K-A@12; missed K-R@24	1	P01042
sp|P01042|KNG1_HUMAN	VLYRITEATKTVGSDTFYSFK	Phosphoguanosine(K)@10	cleaved F-V@N-term; missed R-I@4; missed K-T@10	1	P01042
sp|P01042|KNG1_HUMAN	VQVVAGK			1	P01042
sp|P01042|KNG1_HUMAN	YEIKEGDCPVQSGK	Carbamidomethyl(C)@8	missed K-E@4	1	P01042
sp|P01042|KNG1_HUMAN	YEIKEGDCPVQSGKTWQDCEYKDAAK	Carbamidomethyl(C)@8; Carbamidomethyl(C)@19	missed K-E@4; missed K-T@14; missed K-D@22	1	P01042
sp|P01042|KNG1_HUMAN	YFIDFVAR	Carbamidomethyl@N-term		1	P01042
sp|P01042|KNG1_HUMAN	YNSQNQSNNQFVLYR			1	P01042
sp|P01042|KNG1_HUMAN	YNSQNQSNNQFVLYRITEATKTVGSDTFYSFK		missed R-I@15; missed K-T@21	1	P01042
sp|P01042|KNG1_HUMAN	YSFKYEIKEGDCPVQSGK	Carbamidomethyl(C)@12	cleaved F-Y@N-term; missed K-Y@4; missed K-E@8	1	P01042
sp|P01042|KNG1_HUMAN	TWQDCEYK	Carbamidomethyl(C)@5		1	P01042
sp|P01042|KNG1_HUMAN	SLWNGDTGECTDNAYIDIQLR	Carbamidomethyl(C)@10; Deamidated(N)@13		1	P01042
sp|P01042|KNG1_HUMAN	SFSQNCDIYPGK	Carbamidomethyl(C)@6	cleaved A-S@N-term	1	P01042
sp|P01042|KNG1_HUMAN	DFVQPPTK			1	P01042
sp|P01042|KNG1_HUMAN	SFSQNCDIYPGKDFVQPPTKICVGCPR	Carbamidomethyl(C)@6; Carbamidomethyl(C)@22; Carbamidomethyl(C)@25	cleaved A-S@N-term; missed K-D@12; missed K-I@20	1	P01042
sp|P01042|KNG1_HUMAN	RPPGFSP		cleaved P-F@C-term	1	P01042
sp|P01042|KNG1_HUMAN	PELEETLTHTITK	Carbamidomethyl@N-term	cleaved S-P@N-term	1	P01042
sp|P01042|KNG1_HUMAN	SPELEETLTHTITK		cleaved N-S@N-term	1	P01042
sp|P01042|KNG1_HUMAN	NSQNQSNNQFVLYR		cleaved Y-N@N-term	1	P01042
sp|P01042|KNG1_HUMAN	KIYPTVN		cleaved N-C@C-term; missed K-I@1	1	P01042
sp|P01042|KNG1_HUMAN	NQFVLYR		cleaved N-N@N-term	1	P01042
sp|P01042|KNG1_HUMAN	EETLTHTITK		cleaved L-E@N-term	1	P01042
sp|P01042|KNG1_HUMAN	ICVGCPRDIPTNSPELEETLTHTITK	Arg-add@N-term; Carbamidomethyl(C)@2; Carbamidomethyl(C)@5; Deamidated(N)@12	missed R-D@7	1	P01042
sp|P01042|KNG1_HUMAN	IDFVAR		cleaved F-I@N-term	2	Q9UM47, P01042
sp|P01042|KNG1_HUMAN	SQSEEIDCNDKDLFK	Deamidated(Q)@2; Carbamidomethyl(C)@8	cleaved E-S@N-term; missed K-D@11	1	P01042
sp|P01042|KNG1_HUMAN	DQGHGHQR	Carbamidomethyl@N-term		1	P01042
sp|P01042|KNG1_HUMAN	QRQVVAGLNFR	Gln->pyro-Glu@N-term	cleaved A-Q@N-term; missed R-Q@2	1	P01042
sp|P01042|KNG1_HUMAN	LTQESQSEEIDCNDKDLFK	Carbamidomethyl(C)@12	cleaved S-L@N-term; missed K-D@15	1	P01042
sp|P01042|KNG1_HUMAN	TKICVGCPRDIPTNSPELEETLTHTITK	Carbamidomethyl(C)@4; Carbamidomethyl(C)@7; Oxidation(P)@16	cleaved P-T@N-term; missed K-I@2; missed R-D@9	1	P01042
sp|P01042|KNG1_HUMAN	ETTCSKESNEELTESCETKKLGQSLDCNAEVYVVPWEKK	Carbamidomethyl(C)@4; Carbamidomethyl(C)@16; Phospho(S)@24; Carbamidomethyl(C)@27; Deamidated(N)@28	missed K-E@6; missed K-K@19; missed K-L@20; missed K-K@38	1	P01042
sp|P01042|KNG1_HUMAN	KARVQVVAGKKYFIDFVAR	Oxidation(R)@3	missed K-A@1; missed R-V@3; missed K-K@10; missed K-Y@11	1	P01042
sp|P01042|KNG1_HUMAN	YNSQNQSNNQFVLYRI	Amino(Y)@14	cleaved I-T@C-term; missed R-I@15	1	P01042
sp|P01042|KNG1_HUMAN	CQPLGMISLMK	Carbamidomethyl(C)@1; Oxidation(M)@10	cleaved N-C@N-term	1	P01042
sp|P01042|KNG1_HUMAN	GMISLMK		cleaved L-G@N-term	1	P01042
sp|P01042|KNG1_HUMAN	EEIDCNDKDLFK	Carbamidomethyl(C)@5	cleaved S-E@N-term; missed K-D@8	1	P01042
sp|P01042|KNG1_HUMAN	DCNDKDLFK	Carbamidomethyl(C)@2	cleaved I-D@N-term; missed K-D@5	1	P01042
sp|P01042|KNG1_HUMAN	ATKTVGSDTFYSFK		cleaved E-A@N-term; missed K-T@3	1	P01042
sp|P01042|KNG1_HUMAN	GKKYFIDFVAR	Carbamyl@N-term	cleaved A-G@N-term; missed K-K@2; missed K-Y@3	1	P01042
sp|P01042|KNG1_HUMAN	IGEIKEETTVSPP	GlyGly(S)@11	cleaved P-H@C-term; missed K-E@5	1	P01042
sp|P01042|KNG1_HUMAN	PPGFSPFRSSRIGEIKEETTVSPPHTSMAPAQDEERDSGKEQGHTR	Glycerophospho(S)@27	cleaved R-P@N-term; missed R-S@8; missed R-I@11; missed K-E@16; missed R-D@36; missed K-E@40	1	P01042
sp|P01042|KNG1_HUMAN	VQVVAGKKYFIDFVAR	Iodo(Y)@9	missed K-K@7; missed K-Y@8	1	P01042
sp|P00734|THRB_HUMAN	ACLEGNCAEGLGTNYR	Carbamidomethyl(C)@2; Carbamidomethyl(C)@7	cleaved A-A@N-term	1	P00734
sp|P00734|THRB_HUMAN	AIEGRTATSEYQTFFNPR		missed R-T@5	1	P00734
sp|P00734|THRB_HUMAN	ATSEYQTFFNPR		cleaved T-A@N-term	1	P00734
sp|P00734|THRB_HUMAN	DGKYGFYTHVFR		missed K-Y@3	1	P00734
sp|P00734|THRB_HUMAN	DKLAACLEGNCAEGLGTNYR	Carbamidomethyl(C)@6; Carbamidomethyl(C)@11	missed K-L@2	1	P00734
sp|P00734|THRB_HUMAN	DRGQQYQGRLAVTTHGLPCLAWASAQAK	Carbamidomethyl(C)@19	cleaved P-D@N-term; missed R-G@2; missed R-L@9	1	P00734
sp|P00734|THRB_HUMAN	DSSTTGPWCYTTDPTVR	Carbamidomethyl(C)@9	cleaved P-D@N-term	1	P00734
sp|P00734|THRB_HUMAN	EGRTATSEYQTFFNPR		cleaved I-E@N-term; missed R-T@3	1	P00734
sp|P00734|THRB_HUMAN	ELLESYIDGR			1	P00734
sp|P00734|THRB_HUMAN	ENLDRDIALMK		missed R-D@5	1	P00734
sp|P00734|THRB_HUMAN	ETAASLLQAGYK			1	P00734
sp|P00734|THRB_HUMAN	ETAASLLQAGYKGR		missed K-G@12	1	P00734
sp|P00734|THRB_HUMAN	ETWTANVGKGQPSVLQVVNLPIVERPVCK	Carbamidomethyl(C)@28	missed K-G@9	1	P00734
sp|P00734|THRB_HUMAN	ETWTANVGKGQPSVLQVVNLPIVERPVCKDSTR	Carbamidomethyl(C)@28	missed K-G@9; missed K-D@29	1	P00734
sp|P00734|THRB_HUMAN	GDACEGDSGGPFVMK	Carbamidomethyl(C)@4		1	P00734
sp|P00734|THRB_HUMAN	GDACEGDSGGPFVMKSPFNNR	Carbamidomethyl(C)@4	missed K-S@15	1	P00734
sp|P00734|THRB_HUMAN	GQPSVLQVVNLPIVERPVCK	Deamidated(Q)@7; Carbamidomethyl(C)@19		1	P00734
sp|P00734|THRB_HUMAN	GQPSVLQVVNLPIVERPVCKDSTR	Carbamidomethyl(C)@19	missed K-D@20	1	P00734
sp|P00734|THRB_HUMAN	GRLAVTTHGLPCLAWASAQAK	Carbamidomethyl(C)@12	cleaved Q-G@N-term; missed R-L@2	1	P00734
sp|P00734|THRB_HUMAN	GRVTGWGNLK		missed R-V@2	1	P00734
sp|P00734|THRB_HUMAN	HQDFNSAVQLVENFCR	Carbamidomethyl(C)@15		1	P00734
sp|P00734|THRB_HUMAN	IRITDNMFCAGYKPDEGK	Carbamidomethyl(C)@9	missed R-I@2	1	P00734
sp|P00734|THRB_HUMAN	IRITDNMFCAGYKPDEGKR	Carbamidomethyl(C)@9	missed R-I@2; missed K-R@18	1	P00734
sp|P00734|THRB_HUMAN	IRITDNMFCAGYKPDEGKRGDACEGDSGGPFVMK	Carbamidomethyl(C)@9; Deamidated(R)@19; Carbamidomethyl(C)@23	missed R-I@2; missed K-R@18; missed R-G@19	1	P00734
sp|P00734|THRB_HUMAN	ISMLEK			7	Q8TD22, P00734, Q14008, Q68DC2, Q149N8, A6NHR9, Q9Y3I1
sp|P00734|THRB_HUMAN	ITDNMFCAGYKPDEGK	Carbamidomethyl(C)@7		1	P00734
sp|P00734|THRB_HUMAN	ITDNMFCAGYKPDEGKR	Carbamidomethyl(C)@7	missed K-R@16	1	P00734
sp|P00734|THRB_HUMAN	ITDNMFCAGYKPDEGKRGDACEGDSGGPFVMK	Carbamidomethyl(C)@7; Carbamidomethyl(C)@21	missed K-R@16; missed R-G@17	1	P00734
sp|P00734|THRB_HUMAN	IVEGSDAEIGMSPWQVMLFRK	Carbamidomethyl@N-term	missed R-K@20	1	P00734
sp|P00734|THRB_HUMAN	IYIHPR	Carbamyl@N-term		2	P00734, Q8WX92
sp|P00734|THRB_HUMAN	KSLEDKTERELLESYIDGR		missed K-S@1; missed K-T@6; missed R-E@9	1	P00734
sp|P00734|THRB_HUMAN	KSPQELLCGASLISDR	Carbamidomethyl(C)@8	missed K-S@1	1	P00734
sp|P00734|THRB_HUMAN	LAACLEGNCAEGLGTNYR	Carbamidomethyl(C)@4; Carbamidomethyl(C)@9		1	P00734
sp|P00734|THRB_HUMAN	LAVTTHGLPCLAWASAQAK	Carbamidomethyl(C)@10		1	P00734
sp|P00734|THRB_HUMAN	LKKPVAFSDYIHPVCLPDRETAASLLQAGYK	Carbamidomethyl(C)@15	missed K-K@2; missed R-E@19	1	P00734
sp|P00734|THRB_HUMAN	LKKPVAFSDYIHPVCLPDRETAASLLQAGYKGR	Carbamidomethyl(C)@15	missed K-K@2; missed R-E@19; missed K-G@31	1	P00734
sp|P00734|THRB_HUMAN	NIEKISMLEK		missed K-I@4	1	P00734
sp|P00734|THRB_HUMAN	NPDSSTTGPWCYTTDPTVR	Carbamidomethyl(C)@11		1	P00734
sp|P00734|THRB_HUMAN	PVCGQDQVTVAMTPR	Carbamidomethyl(C)@3	cleaved I-P@N-term	1	P00734
sp|P00734|THRB_HUMAN	QECSIPVCGQDQVTVAMTPR	Carbamidomethyl(C)@3; Dehydrated(S)@4; Carbamidomethyl(C)@8		1	P00734
sp|P00734|THRB_HUMAN	QELLCGASLISDR	Carbamidomethyl(C)@5	cleaved P-Q@N-term	1	P00734
sp|P00734|THRB_HUMAN	RGDACEGDSGGPFVMK	Carbamidomethyl(C)@5	missed R-G@1	1	P00734
sp|P00734|THRB_HUMAN	RQECSIPVCGQDQVTVAMTPR	Carbamidomethyl(C)@4; Carbamidomethyl(C)@9	missed R-Q@1	1	P00734
sp|P00734|THRB_HUMAN	SEGSSVNLSPPLEQCVPDR	Carbamidomethyl(C)@15		1	P00734
sp|P00734|THRB_HUMAN	SEGSSVNLSPPLEQCVPDRGQQYQGR	Carbamidomethyl(C)@15	missed R-G@19	1	P00734
sp|P00734|THRB_HUMAN	SGIECQLWR	Carbamidomethyl(C)@5		1	P00734
sp|P00734|THRB_HUMAN	SIPVCGQDQVTVAMTPR	Carbamidomethyl(C)@5	cleaved C-S@N-term	1	P00734
sp|P00734|THRB_HUMAN	SLEDKTERELLESYIDGR		missed K-T@5; missed R-E@8	1	P00734
sp|P00734|THRB_HUMAN	SPQELLCGASLISDR	Carbamidomethyl(C)@7		1	P00734
sp|P00734|THRB_HUMAN	SSTATDVFWAK		cleaved E-S@N-term	1	P00734
sp|P00734|THRB_HUMAN	TATSEYQTFFNPR			1	P00734
sp|P00734|THRB_HUMAN	TERELLESYIDGR		missed R-E@3	1	P00734
sp|P00734|THRB_HUMAN	TFGSGEADCGLRPLFEK	Carbamidomethyl(C)@9		1	P00734
sp|P00734|THRB_HUMAN	TFGSGEADCGLRPLFEKK	Carbamidomethyl(C)@9	missed K-K@17	1	P00734
sp|P00734|THRB_HUMAN	TRSGIECQLWR	Acetyl@N-term; Carbamidomethyl(C)@7	cleaved I-T@N-term; missed R-S@2	1	P00734
sp|P00734|THRB_HUMAN	TSEYQTFFNPR		cleaved A-T@N-term	1	P00734
sp|P00734|THRB_HUMAN	VIDQFGE			2	O43242, P00734
sp|P00734|THRB_HUMAN	VTGWGNLK			1	P00734
sp|P00734|THRB_HUMAN	VTGWGNLKETWTANVGK		missed K-E@8	1	P00734
sp|P00734|THRB_HUMAN	VTTHGLPCLAWASAQAK	Carbamidomethyl(C)@8	cleaved A-V@N-term	1	P00734
sp|P00734|THRB_HUMAN	WCYTTDPTVR	Carbamidomethyl(C)@2	cleaved P-W@N-term	1	P00734
sp|P00734|THRB_HUMAN	WIQKVIDQFGE		missed K-V@4	1	P00734
sp|P00734|THRB_HUMAN	YGFYTHVFR			1	P00734
sp|P00734|THRB_HUMAN	YNWRENLDR		missed R-E@4	1	P00734
sp|P00734|THRB_HUMAN	YNWRENLDRDIALMK		missed R-E@4; missed R-D@9	1	P00734
sp|P00734|THRB_HUMAN	KPVAFSDYIHPVCLPDRETAASLLQAGYKGR	Carbamidomethyl(C)@13	missed R-E@17; missed K-G@29	1	P00734
sp|P00734|THRB_HUMAN	GLPCLAWASAQAK	Carbamidomethyl(C)@4	cleaved H-G@N-term	1	P00734
sp|P00734|THRB_HUMAN	YTACETAR	Carbamidomethyl(C)@4		1	P00734
sp|P00734|THRB_HUMAN	PDSSTTGPWCYTTDPTVR	Carbamidomethyl(C)@10	cleaved N-P@N-term	1	P00734
sp|P00734|THRB_HUMAN	NPDSSTTGPWCYTTDPTVRRQECSIPVCGQDQVTVAMTPR	Ammonia-loss(N)@1; Carbamidomethyl(C)@11; Carbamidomethyl(C)@23; Carbamidomethyl(C)@28	missed R-R@19; missed R-Q@20	1	P00734
sp|P00734|THRB_HUMAN	SGIECQLWRSR	Carbamidomethyl(C)@5	missed R-S@9	1	P00734
sp|P00734|THRB_HUMAN	VGKGQPSVLQVVNLPIVERPVCK	Carbamidomethyl(C)@22	cleaved N-V@N-term; missed K-G@3	1	P00734
sp|P00734|THRB_HUMAN	KKSLEDKTERELLESYIDGR		cleaved E-K@N-term; missed K-K@1; missed K-S@2; missed K-T@7; missed R-E@10	1	P00734
sp|P00734|THRB_HUMAN	ETWTANVGK			1	P00734
sp|P00734|THRB_HUMAN	LEEVRK		cleaved F-L@N-term; missed R-K@5	22	P30622, Q92805, Q9UQ10, Q92616, O43295, Q8IWZ8, Q86YW0, P16949, Q9BT92, P15735, Q9ULE4, A6NNP5, Q8NER5, O00160, P18848, P00734, Q8NG27, Q16772, Q53GL7, P55196, P41229, Q9UI47
sp|P00734|THRB_HUMAN	WYQMGIVSWGEGCDRDGK	Carbamidomethyl@N-term; Deamidated(Q)@3; Carbamidomethyl(C)@13	missed R-D@15	1	P00734
sp|P00734|THRB_HUMAN	GIECQLWR	Carbamidomethyl(C)@4	cleaved S-G@N-term	1	P00734
sp|P00734|THRB_HUMAN	GRTATSEYQTFFNPR	Oxidation(R)@2	cleaved E-G@N-term; missed R-T@2	1	P00734
sp|P00734|THRB_HUMAN	SPWQVMLFRKSPQELLCGASLISDR	Dioxidation(W)@3; Deamidated(Q)@4; Carbamidomethyl(C)@17	cleaved M-S@N-term; missed R-K@9; missed K-S@10	1	P00734
sp|P00734|THRB_HUMAN	VEEETGDGLDEDSDRAIEGRTATSEYQTFFNPR	Oxidation(R)@20	cleaved A-V@N-term; missed R-A@15; missed R-T@20	1	P00734
sp|P00734|THRB_HUMAN	ERELLESYIDGR	Carbamyl@N-term	cleaved T-E@N-term; missed R-E@2	1	P00734
sp|P00734|THRB_HUMAN	LESSTATDVFWAK	Carbamidomethyl@N-term	cleaved A-L@N-term	1	P00734
sp|P00734|THRB_HUMAN	LESYIDGR		cleaved L-L@N-term	1	P00734
sp|P00734|THRB_HUMAN	DEDSDRAIEGRTATSEYQTFFNPR	Methyl(E)@9	cleaved L-D@N-term; missed R-A@6; missed R-T@11	1	P00734
sp|P00734|THRB_HUMAN	DSDRAIEGRTATSEYQTFFNPR		cleaved E-D@N-term; missed R-A@4; missed R-T@9	1	P00734
sp|P00734|THRB_HUMAN	EGLGTNYRGHVNITRSGIECQLWR	Oxidation(H)@10; Carbamidomethyl(C)@20	cleaved A-E@N-term; missed R-G@8; missed R-S@15	1	P00734
sp|P00734|THRB_HUMAN	WVLTAAH		cleaved H-C@C-term	51	P57727, P49862, P08519, Q6ZR98, O00187, Q86WS5, Q9NRS4, P00747, P00748, P20231, Q9GZN4, Q15661, O43240, P03952, P10323, P12544, A6NIE9, O60259, Q9P0G3, P00734, Q7RTZ1, P06870, P07288, P05981, P0CW18, Q9UKR3, Q9UKR0, E7EML9, P08217, P51124, nP08218, Q9BQR3, P56730, E5RG02, Q8NF86, Q9BYE2, P06681, P09871, Q8IU80, Q92876, P20151, P48740, Q8IYP2, Q9UNI1, Q9NRR2, Q2L4Q9, Q9BZJ3, P04070, A0A1B0, P49863…
sp|P00450|CERU_HUMAN	ADDKVYPGEQYTYMLLATEEQSPGEGDGNCVTR	Carbamidomethyl(C)@30	missed K-V@4	1	P00450
sp|P00450|CERU_HUMAN	AEEEHLGILGPQLHADVGDKVK		missed K-V@20	1	P00450
sp|P00450|CERU_HUMAN	AETGDKVYVHLK		missed K-V@6	1	P00450
sp|P00450|CERU_HUMAN	ALYLQYTDETFR			1	P00450
sp|P00450|CERU_HUMAN	DIASGLIGPLIICK	Carbamidomethyl(C)@13		1	P00450
sp|P00450|CERU_HUMAN	DIASGLIGPLIICKK	Carbamidomethyl(C)@13	missed K-K@14	1	P00450
sp|P00450|CERU_HUMAN	DLYSGLIGPLIVCR	Carbamidomethyl(C)@13		1	P00450
sp|P00450|CERU_HUMAN	EGTYYSPNYNPQSR		cleaved N-E@N-term	1	P00450
sp|P00450|CERU_HUMAN	EVGPTNADPVCLAK	Carbamidomethyl(C)@11		1	P00450
sp|P00450|CERU_HUMAN	EYTDASFTNR			1	P00450
sp|P00450|CERU_HUMAN	FNKNNEGTYYSPNYNPQSR		missed K-N@3	1	P00450
sp|P00450|CERU_HUMAN	FSWYLEDNIKTYCSEPEKVDKDNEDFQESNR	Carbamidomethyl(C)@13	cleaved N-F@N-term; missed K-T@10; missed K-V@18; missed K-D@21	1	P00450
sp|P00450|CERU_HUMAN	GAYPLSIEPIGVR			1	P00450
sp|P00450|CERU_HUMAN	GAYPLSIEPIGVRFNK		missed R-F@13	1	P00450
sp|P00450|CERU_HUMAN	GPQLHADVGDKVK		cleaved L-G@N-term; missed K-V@11	1	P00450
sp|P00450|CERU_HUMAN	IPERSGAGTEDSACIPWAYYSTVDQVK	Carbamyl@N-term; Carbamidomethyl(C)@14; Trp->Kynurenin(W)@17	missed R-S@4	1	P00450
sp|P00450|CERU_HUMAN	IYHSHIDAPK			1	P00450
sp|P00450|CERU_HUMAN	IYHSHIDAPKDIASGLIGPLIICKK	Carbamidomethyl(C)@23	missed K-D@10; missed K-K@24	1	P00450
sp|P00450|CERU_HUMAN	KAEEEHLGILGPQLHADVGDK		missed K-A@1	1	P00450
sp|P00450|CERU_HUMAN	KAEEEHLGILGPQLHADVGDKVK		missed K-A@1; missed K-V@21	1	P00450
sp|P00450|CERU_HUMAN	KAEEEHLGILGPQLHADVGDKVKII		cleaved I-F@C-term; missed K-A@1; missed K-V@21; missed K-I@23	1	P00450
sp|P00450|CERU_HUMAN	KALYLQYTDETFR		missed K-A@1	1	P00450
sp|P00450|CERU_HUMAN	KLISVDTEHSNIYLQNGPDR		missed K-L@1	1	P00450
sp|P00450|CERU_HUMAN	KLISVDTEHSNIYLQNGPDRIGR		missed K-L@1; missed R-I@20	1	P00450
sp|P00450|CERU_HUMAN	LISVDTEHSNIYLQNGPDR			1	P00450
sp|P00450|CERU_HUMAN	LISVDTEHSNIYLQNGPDRIGR		missed R-I@19	1	P00450
sp|P00450|CERU_HUMAN	LSIEPIGVR		cleaved P-L@N-term	1	P00450
sp|P00450|CERU_HUMAN	LVYREYTDASFTNR		missed R-E@4	1	P00450
sp|P00450|CERU_HUMAN	LVYREYTDASFTNRK		missed R-E@4; missed R-K@14	1	P00450
sp|P00450|CERU_HUMAN	LYLQYTDETFR		cleaved A-L@N-term	1	P00450
sp|P00450|CERU_HUMAN	MFTTAPDQVDKEDEDFQESNK	Oxidation(M)@1	missed K-E@11	1	P00450
sp|P00450|CERU_HUMAN	MFTTAPDQVDKEDEDFQESNKMHSMNGFMYGNQPGLTMCK	Deamidated(N)@26; Carbamidomethyl(C)@39	missed K-E@11; missed K-M@21	1	P00450
sp|P00450|CERU_HUMAN	MYYSAVDPTK	Oxidation(M)@1		1	P00450
sp|P00450|CERU_HUMAN	NEGTYYSPNYNPQSR		cleaved N-N@N-term	1	P00450
sp|P00450|CERU_HUMAN	NLASRPYTFHSHGITYYK			1	P00450
sp|P00450|CERU_HUMAN	NMATRPYSIHAHGVQTESSTVTPTLPGETLTYVWK			1	P00450
sp|P00450|CERU_HUMAN	NMATRPYSIHAHGVQTESSTVTPTLPGETLTYVWKIPER		missed K-I@35	1	P00450
sp|P00450|CERU_HUMAN	NNEGTYYSPNYNPQSR			1	P00450
sp|P00450|CERU_HUMAN	QKDVDKEFYLFP	Gln->pyro-Glu@N-term; Amidated@C-term	cleaved P-T@C-term; missed K-D@2; missed K-E@6	1	P00450
sp|P00450|CERU_HUMAN	QSEDSTFYLGER			1	P00450
sp|P00450|CERU_HUMAN	QYTDSTFRVPVER	Gln->pyro-Glu@N-term	missed R-V@8	1	P00450
sp|P00450|CERU_HUMAN	QYTDSTFRVPVERK	Gln->pyro-Glu@N-term	missed R-V@8; missed R-K@13	1	P00450
sp|P00450|CERU_HUMAN	RDTANLFPQTSLTLHMWPDTEGTFNVECLTTDHYTGGMK	Carbamidomethyl(E)@27; Carbamidomethyl(C)@28	missed R-D@1	1	P00450
sp|P00450|CERU_HUMAN	RQSEDSTFYLGER		missed R-Q@1	1	P00450
sp|P00450|CERU_HUMAN	SEDSTFYLGER		cleaved Q-S@N-term	1	P00450
sp|P00450|CERU_HUMAN	SGAGTEDSACIPWAYY	Carbamidomethyl(C)@10	cleaved Y-S@C-term	1	P00450
sp|P00450|CERU_HUMAN	SGAGTEDSACIPWAYYSTVDQVK	Carbamidomethyl(C)@10		1	P00450
sp|P00450|CERU_HUMAN	SVPPSASHVAPTETFTYEWTVPK			1	P00450
sp|P00450|CERU_HUMAN	SVPPSASHVAPTETFTYEWTVPKEVGPTNADPVCLAK	Carbamidomethyl(C)@34	missed K-E@23	1	P00450
sp|P00450|CERU_HUMAN	TPGIWLLH		cleaved H-C@C-term	1	P00450
sp|P00450|CERU_HUMAN	TYCSEPEKVDKDNEDFQESNR	Carbamidomethyl(C)@3	missed K-V@8; missed K-D@11	1	P00450
sp|P00450|CERU_HUMAN	TYSDHPEKVNKDDEEFIESNK		missed K-V@8; missed K-D@11	1	P00450
sp|P00450|CERU_HUMAN	TYSDHPEKVNKDDEEFIESNKMHAINGR		missed K-V@8; missed K-D@11; missed K-M@21	1	P00450
sp|P00450|CERU_HUMAN	VNKDDEEFIESNK		missed K-D@3	1	P00450
sp|P00450|CERU_HUMAN	VNKDDEEFIESNKMHAINGR		missed K-D@3; missed K-M@13	1	P00450
sp|P00450|CERU_HUMAN	VTFHNKGAYPLSIEPIGVR		missed K-G@6	1	P00450
sp|P00450|CERU_HUMAN	VVYRQYTDSTFR		missed R-Q@4	1	P00450
sp|P00450|CERU_HUMAN	VYPGEQYTYMLLATEEQSPGEGDGNCVTR	Deamidated(Q)@17; Carbamidomethyl(C)@26		1	P00450
sp|P00450|CERU_HUMAN	YLKVFN		cleaved P-Y@N-term; cleaved N-P@C-term; missed K-V@3	2	P00450, Q96CW5
sp|P00450|CERU_HUMAN	YTVNQCR	Carbamidomethyl(C)@6		1	P00450
sp|P00450|CERU_HUMAN	QYTDSTFR			1	P00450
sp|P00450|CERU_HUMAN	GAYPLSIEPIGVRFNKNNEGTYYSPNYNPQSR		missed R-F@13; missed K-N@16	1	P00450
sp|P00450|CERU_HUMAN	FNKNNEGTYYSPN		cleaved N-Y@C-term; missed K-N@3	1	P00450
sp|P00450|CERU_HUMAN	YPLSIEPIGVR		cleaved A-Y@N-term	1	P00450
sp|P00450|CERU_HUMAN	HNKGAYPLSIEPIGVR		cleaved F-H@N-term; missed K-G@3	1	P00450
sp|P00450|CERU_HUMAN	KLVYREYTDASFTNRK		missed K-L@1; missed R-E@5; missed R-K@15	1	P00450
sp|P00450|CERU_HUMAN	EYTDASFTNRK		missed R-K@10	1	P00450
sp|P00450|CERU_HUMAN	VVYRQYTDSTFRVPVER		missed R-Q@4; missed R-V@12	1	P00450
sp|P00450|CERU_HUMAN	DIFTGLIGPMK	Oxidation(M)@10		1	P00450
sp|P00450|CERU_HUMAN	DVDKEFYLFP		cleaved P-T@C-term; missed K-E@4	1	P00450
sp|P00450|CERU_HUMAN	RKAEEEHLGILGPQLHADVGDKVK		cleaved E-R@N-term; missed R-K@1; missed K-A@2; missed K-V@22	1	P00450
sp|P00450|CERU_HUMAN	YEWTVPKEVGPTNADPVCLAK	Oxidation(W)@3; Carbamidomethyl(C)@18	cleaved T-Y@N-term; missed K-E@7	1	P00450
sp|P00450|CERU_HUMAN	FNKNNEGTYYSPNYN		cleaved N-P@C-term; missed K-N@3	1	P00450
sp|P00450|CERU_HUMAN	PEKVDKDNEDFQESNR		cleaved E-P@N-term; missed K-V@3; missed K-D@6	1	P00450
sp|P00450|CERU_HUMAN	HGVQTESSTVTPTLPGETLTYVWK		cleaved A-H@N-term	1	P00450
sp|P00450|CERU_HUMAN	AYPLSIEPIGVRFNKNNEGTYYSPNYNPQSR	Oxidation(P)@8; Deamidated(N)@16; Deamidated(N)@17	cleaved G-A@N-term; missed R-F@12; missed K-N@15	1	P00450
sp|P00450|CERU_HUMAN	ETFTYEWTVPKEVGPTNADPVCLAK	Glu->pyro-Glu@N-term; Iodo(Y)@5; Carbamidomethyl(C)@22	cleaved T-E@N-term; missed K-E@11	1	P00450
sp|P00450|CERU_HUMAN	LISVDTEHSNIYLQNGPDRI	Deamidated(R)@19; Methyl(I)@20	cleaved I-G@C-term; missed R-I@19	1	P00450
sp|P00450|CERU_HUMAN	YYSPNYNPQSRSVPPSASHVAPTETFTYEWTVPKEVGPTNADPVCLAK	Carbamidomethyl(C)@45	cleaved T-Y@N-term; missed R-S@11; missed K-E@34	1	P00450
sp|P43652|AFAM_HUMAN	AESPEVCFNEESPK	Carbamidomethyl(C)@7		1	P43652
sp|P43652|AFAM_HUMAN	AESPEVCFNEESPKIGN	Carbamidomethyl(C)@7	missed K-I@14	1	P43652
sp|P43652|AFAM_HUMAN	AIPVTQYLK			1	P43652
sp|P43652|AFAM_HUMAN	CCKAESPEVCFNEESPK	Carbamidomethyl(C)@1; Carbamidomethyl(C)@2; Carbamidomethyl(C)@10	missed K-A@3	1	P43652
sp|P43652|AFAM_HUMAN	CCKAESPEVCFNEESPKIGN	Carbamidomethyl(C)@1; Carbamidomethyl(C)@2; Carbamidomethyl(C)@10	missed K-A@3; missed K-I@17	1	P43652
sp|P43652|AFAM_HUMAN	CMADKTLPECSKLPNNVLQEK	Carbamidomethyl(C)@1; Lys->Allysine(K)@5; Carbamidomethyl(C)@10	missed K-T@5; missed K-L@12	1	P43652
sp|P43652|AFAM_HUMAN	DADPDTFFAK			1	P43652
sp|P43652|AFAM_HUMAN	DGLKYHYLIR		missed K-Y@4	1	P43652
sp|P43652|AFAM_HUMAN	DKTLPECSKLPNNVLQEK	Phosphoguanosine(K)@2; Carbamidomethyl(C)@7	cleaved A-D@N-term; missed K-T@2; missed K-L@9	1	P43652
sp|P43652|AFAM_HUMAN	DLSLREGKFTDSENVCQER	Carbamidomethyl(C)@16	missed R-E@5; missed K-F@8	1	P43652
sp|P43652|AFAM_HUMAN	DLSLREGKFTDSENVCQERDADPDTFFAK	Carbamidomethyl(C)@16; Deamidated(R)@19	missed R-E@5; missed K-F@8; missed R-D@19	1	P43652
sp|P43652|AFAM_HUMAN	DTSKVMNHICSKQDSISSK	Carbamidomethyl(C)@10	missed K-V@4; missed K-Q@12	1	P43652
sp|P43652|AFAM_HUMAN	EGKFTDSENVCQER	Carbamidomethyl(C)@11	missed K-F@3	1	P43652
sp|P43652|AFAM_HUMAN	EGKFTDSENVCQERDADPDTFFAK	Carbamidomethyl(C)@11	missed K-F@3; missed R-D@14	1	P43652
sp|P43652|AFAM_HUMAN	ESLLNHFLYEVAR			1	P43652
sp|P43652|AFAM_HUMAN	FLVNLVK			1	P43652
sp|P43652|AFAM_HUMAN	FTDSENVCQER	Carbamidomethyl(C)@8		1	P43652
sp|P43652|AFAM_HUMAN	FTDSENVCQERDADPDTFFAK	Carbamidomethyl(C)@8	missed R-D@11	1	P43652
sp|P43652|AFAM_HUMAN	FTFEYSR	Carbamidomethyl@N-term		1	P43652
sp|P43652|AFAM_HUMAN	GQCIINSNKDDRPKDLSLR	Carbamidomethyl(C)@3	missed K-D@9; missed K-D@14	1	P43652
sp|P43652|AFAM_HUMAN	GQCIINSNKDDRPKDLSLREGK	Carbamidomethyl(C)@3	missed K-D@9; missed K-D@14; missed R-E@19	1	P43652
sp|P43652|AFAM_HUMAN	HFQNLGK			1	P43652
sp|P43652|AFAM_HUMAN	HFQNLGKDGLK		missed K-D@7	1	P43652
sp|P43652|AFAM_HUMAN	HPDLSIPELLR			1	P43652
sp|P43652|AFAM_HUMAN	IAPQLSTEELVSLGEK			1	P43652
sp|P43652|AFAM_HUMAN	ICAMEGLPQK	Carbamidomethyl(C)@2		1	P43652
sp|P43652|AFAM_HUMAN	IPERGQCIINSNKDDRPK	Carbamidomethyl(C)@7	missed R-G@4; missed K-D@13	1	P43652
sp|P43652|AFAM_HUMAN	IVQIYK	Carbamidomethyl@N-term		6	Q58DX5, Q8NDV3, Q7Z4H8, Q969F9, P43652, Q9H2Y7
sp|P43652|AFAM_HUMAN	IVQIYKDLLR		missed K-D@6	1	P43652
sp|P43652|AFAM_HUMAN	KIPERGQCIINSNKDDRPK	Carbamidomethyl(C)@8	missed K-I@1; missed R-G@5; missed K-D@14	1	P43652
sp|P43652|AFAM_HUMAN	KIPERGQCIINSNKDDRPKDLSLR	Carbamidomethyl(C)@8	missed K-I@1; missed R-G@5; missed K-D@14; missed K-D@19	1	P43652
sp|P43652|AFAM_HUMAN	KIPERGQCIINSNKDDRPKDLSLREGK	Carbamidomethyl(C)@8	missed K-I@1; missed R-G@5; missed K-D@14; missed K-D@19; missed R-E@24	1	P43652
sp|P43652|AFAM_HUMAN	KSDVGFLPPFPTLD		cleaved D-P@C-term; missed K-S@1	1	P43652
sp|P43652|AFAM_HUMAN	KSDVGFLPPFPTLDPEEK		missed K-S@1	1	P43652
sp|P43652|AFAM_HUMAN	KTDRFLVNLVK		missed K-T@1; missed R-F@4	1	P43652
sp|P43652|AFAM_HUMAN	LCFFYNK	Carbamidomethyl(C)@2		1	P43652
sp|P43652|AFAM_HUMAN	LCFFYNKK	Carbamidomethyl(C)@2	missed K-K@7	1	P43652
sp|P43652|AFAM_HUMAN	LPNNVLQEK			1	P43652
sp|P43652|AFAM_HUMAN	LTKIAPQLSTEELVSLGEK		missed K-I@3	1	P43652
sp|P43652|AFAM_HUMAN	LVKDMVEYKDR		missed K-D@3; missed K-D@9	1	P43652
sp|P43652|AFAM_HUMAN	MVQQECKHFQNLGK	Carbamidomethyl(C)@6	missed K-H@7	1	P43652
sp|P43652|AFAM_HUMAN	MVQQECKHFQNLGKDGLK	Carbamidomethyl(C)@6	missed K-H@7; missed K-D@14	1	P43652
sp|P43652|AFAM_HUMAN	PPFPTLDPEEK		cleaved L-P@N-term	1	P43652
sp|P43652|AFAM_HUMAN	QNLGKDGLKYHYLIRLTKIAPQLSTEELVSLGEK		cleaved F-Q@N-term; missed K-D@5; missed K-Y@9; missed R-L@15; missed K-I@18	1	P43652
sp|P43652|AFAM_HUMAN	RHPDLSIPELLR		missed R-H@1	1	P43652
sp|P43652|AFAM_HUMAN	RLCFFYNK	Carbamidomethyl(C)@3	missed R-L@1	1	P43652
sp|P43652|AFAM_HUMAN	RLCFFYNKK	Carbamidomethyl(C)@3	missed R-L@1; missed K-K@8	1	P43652
sp|P43652|AFAM_HUMAN	RPCFESLKADK	Carbamidomethyl(C)@3	missed K-A@8	1	P43652
sp|P43652|AFAM_HUMAN	RPCFESLKADKTYVPPPFSQDLFTFHADMCQSQNEELQR	Carbamidomethyl(C)@3; Carbamidomethyl(K)@11; Carbamidomethyl(C)@30	missed K-A@8; missed K-T@11	1	P43652
sp|P43652|AFAM_HUMAN	SCCEEQNKVNCLQTR	Carbamidomethyl(C)@2; Carbamidomethyl(C)@3; Carbamidomethyl(C)@11	missed K-V@8	1	P43652
sp|P43652|AFAM_HUMAN	SDVGFLPPFPTLDPEEK			1	P43652
sp|P43652|AFAM_HUMAN	SDVGFLPPFPTLDPEEKCQAYESNR	Carbamidomethyl(C)@18	missed K-C@17	1	P43652
sp|P43652|AFAM_HUMAN	TDRFLVNLVK		missed R-F@3	1	P43652
sp|P43652|AFAM_HUMAN	TINPAVDHCCK	Carbamidomethyl(C)@9; Carbamidomethyl(C)@10		1	P43652
sp|P43652|AFAM_HUMAN	TKIAPQLSTEELVSLGEK	Delta:H(2)C(2)(K)@2; Deamidated(Q)@6	cleaved L-T@N-term; missed K-I@2	1	P43652
sp|P43652|AFAM_HUMAN	TLPECSKLPNNVLQEK	Oxidation(P)@3; Carbamidomethyl(C)@5	missed K-L@7	1	P43652
sp|P43652|AFAM_HUMAN	VMNHICSKQDSISSK	Carbamidomethyl(C)@6	missed K-Q@8	1	P43652
sp|P43652|AFAM_HUMAN	YHYLIR			1	P43652
sp|P43652|AFAM_HUMAN	TNFAFR			2	P43652, Q86WD7
sp|P43652|AFAM_HUMAN	YHYLIRLTKIAPQLSTEELVSLGEK		missed R-L@6; missed K-I@9	1	P43652
sp|P43652|AFAM_HUMAN	DLSIPELLR		cleaved P-D@N-term	1	P43652
sp|P43652|AFAM_HUMAN	KSDVGFLPPFPTLDPEEKCQAYESNR	Carbamidomethyl(C)@19	missed K-S@1; missed K-C@18	1	P43652
sp|P43652|AFAM_HUMAN	GKDGLKYHYLIRLTKIAPQLSTEELVSLGEK	GlnGlnGlnThrGlyGly(K)@15	cleaved L-G@N-term; missed K-D@2; missed K-Y@6; missed R-L@12; missed K-I@15	1	P43652
sp|P43652|AFAM_HUMAN	ADKTYVPPPFSQDLFTFHADMCQSQNEELQR	Carbamidomethyl(D)@20; Carbamidomethyl(C)@22	missed K-T@3	1	P43652
sp|P43652|AFAM_HUMAN	FTDSENVCQERDAD	Carbamidomethyl(C)@8	cleaved D-P@C-term; missed R-D@11	1	P43652
sp|P43652|AFAM_HUMAN	TYVPPPFSQDLFTFHADMCQSQNEELQR	Deamidated(Q)@9; Carbamidomethyl(D)@17; Carbamidomethyl(C)@19		1	P43652
sp|P43652|AFAM_HUMAN	LTLPTQPR		cleaved S-L@N-term	1	P43652
sp|P43652|AFAM_HUMAN	CFESLK	Carbamidomethyl(C)@1	cleaved P-C@N-term	1	P43652
sp|P43652|AFAM_HUMAN	PERGQCIINSNKDDRPKDLSLREGK	Carbamidomethyl(C)@6; GlyGlyGln(K)@12	cleaved I-P@N-term; missed R-G@3; missed K-D@12; missed K-D@17; missed R-E@22	1	P43652
sp|P43652|AFAM_HUMAN	RLCFFYNKKSDVGFLPPFPTLDPEEKCQAYESNR	Methyl(R)@1; Carbamidomethyl(C)@3; Carbamidomethyl(C)@27	missed R-L@1; missed K-K@8; missed K-S@9; missed K-C@26	1	P43652
sp|P43652|AFAM_HUMAN	GQCIINSNKDDRPKDLSLREGKFTDSENVCQER	Carbamidomethyl(C)@3; Carbamidomethyl(C)@30	missed K-D@9; missed K-D@14; missed R-E@19; missed K-F@22	1	P43652
sp|P43652|AFAM_HUMAN	ADKTLPECSKLPNNVLQEK	Lys-add@N-term; Oxidation(D)@2; Carbamidomethyl(C)@8	cleaved M-A@N-term; missed K-T@3; missed K-L@10	1	P43652
sp|P43652|AFAM_HUMAN	PDTFFAK		cleaved D-P@N-term	1	P43652
sp|P01008|ANT3_HUMAN	ADGESCSASMMYQEGK	Carbamidomethyl(C)@6		1	P01008
sp|P01008|ANT3_HUMAN	ADGESCSASMMYQEGKFR	Carbamidomethyl(C)@6	missed K-F@16	1	P01008
sp|P01008|ANT3_HUMAN	AFLEVNEEGSEAAASTAVVIAGR			1	P01008
sp|P01008|ANT3_HUMAN	ANRPFLVF		cleaved F-I@C-term	1	P01008
sp|P01008|ANT3_HUMAN	ANRPFLVFIR			1	P01008
sp|P01008|ANT3_HUMAN	ATEDEGSEQKIPEATNR		missed K-I@10	1	P01008
sp|P01008|ANT3_HUMAN	ATEDEGSEQKIPEATNRR		missed K-I@10; missed R-R@17	1	P01008
sp|P01008|ANT3_HUMAN	DDLYVSDAFHK			1	P01008
sp|P01008|ANT3_HUMAN	DIPMNPMCIY	Carbamidomethyl(C)@8	cleaved Y-R@C-term	1	P01008
sp|P01008|ANT3_HUMAN	DIPMNPMCIYR	Dethiomethyl(M)@4; Carbamidomethyl(C)@8		1	P01008
sp|P01008|ANT3_HUMAN	DIPMNPMCIYRSPEK	Carbamidomethyl(C)@8	missed R-S@11	1	P01008
sp|P01008|ANT3_HUMAN	DIPMNPMCIYRSPEKK	Carbamidomethyl(C)@8	missed R-S@11; missed K-K@15	1	P01008
sp|P01008|ANT3_HUMAN	DQIHFFFAK		cleaved S-D@N-term	1	P01008
sp|P01008|ANT3_HUMAN	ELFYKADGESCSASMMYQEGK	Carbamidomethyl(C)@11	missed K-A@5	1	P01008
sp|P01008|ANT3_HUMAN	ELFYKADGESCSASMMYQEGKFR	Carbamidomethyl(C)@11	missed K-A@5; missed K-F@21	1	P01008
sp|P01008|ANT3_HUMAN	EQLQDMGLVDLFSPEK			1	P01008
sp|P01008|ANT3_HUMAN	EVPLNTIIFMGR			1	P01008
sp|P01008|ANT3_HUMAN	EVPLNTIIFMGRVANPCVK	Carbamidomethyl(C)@17	missed R-V@12	1	P01008
sp|P01008|ANT3_HUMAN	FATTFYQH		cleaved H-L@C-term	1	P01008
sp|P01008|ANT3_HUMAN	FATTFYQHLADSK			1	P01008
sp|P01008|ANT3_HUMAN	FRIEDGFSLK		missed R-I@2	1	P01008
sp|P01008|ANT3_HUMAN	GIVAEGRDDLYVSDAFHK		cleaved P-G@N-term; missed R-D@7	1	P01008
sp|P01008|ANT3_HUMAN	GSPVDICTAKPR	Carbamidomethyl(C)@7	cleaved H-G@N-term	1	P01008
sp|P01008|ANT3_HUMAN	HFFFAK		cleaved I-H@N-term	1	P01008
sp|P01008|ANT3_HUMAN	HGSPVDICTAKPR	Carbamidomethyl(C)@8	cleaved C-H@N-term	1	P01008
sp|P01008|ANT3_HUMAN	KATEDEGSEQKIPEATNR		missed K-A@1; missed K-I@11	1	P01008
sp|P01008|ANT3_HUMAN	KATEDEGSEQKIPEATNRR		missed K-A@1; missed K-I@11; missed R-R@18	1	P01008
sp|P01008|ANT3_HUMAN	KELFYKADGESCSASMMYQEGK	Carbamidomethyl(C)@12	missed K-E@1; missed K-A@6	1	P01008
sp|P01008|ANT3_HUMAN	LPGIVAEGRDDLYVSDAFHK		missed R-D@9	1	P01008
sp|P01008|ANT3_HUMAN	LQPLDFK			1	P01008
sp|P01008|ANT3_HUMAN	LQPLDFKENAEQSR		missed K-E@7	1	P01008
sp|P01008|ANT3_HUMAN	LVSANRLFGDK		missed R-L@6	1	P01008
sp|P01008|ANT3_HUMAN	PLDFKENAEQSR		cleaved Q-P@N-term; missed K-E@5	1	P01008
sp|P01008|ANT3_HUMAN	PLNTIIFMGR	Dethiomethyl(M)@8	cleaved V-P@N-term	1	P01008
sp|P01008|ANT3_HUMAN	PMNPMCIYR	Carbamidomethyl(C)@6	cleaved I-P@N-term	1	P01008
sp|P01008|ANT3_HUMAN	RVAEGTQVLELPFKGDDITMVLILPKPEK	Carbamidomethyl(K)@14	missed R-V@1; missed K-G@14	1	P01008
sp|P01008|ANT3_HUMAN	RVWELSK	Formyl@N-term	missed R-V@1	1	P01008
sp|P01008|ANT3_HUMAN	SDQIHFFFAK		cleaved T-S@N-term	1	P01008
sp|P01008|ANT3_HUMAN	SKFSPENTRKELFYKADGESCSASMMYQEGK	Deamidated(N)@7; Carbamidomethyl(C)@21	missed K-F@2; missed R-K@9; missed K-E@10; missed K-A@15	1	P01008
sp|P01008|ANT3_HUMAN	SKLPGIVAEGRDDLYVSDAFHK		missed K-L@2; missed R-D@11	1	P01008
sp|P01008|ANT3_HUMAN	SLNPNRVTFK		missed R-V@6	1	P01008
sp|P01008|ANT3_HUMAN	SPEKKATEDEGSEQKIPEATNR		missed K-K@4; missed K-A@5; missed K-I@15	1	P01008
sp|P01008|ANT3_HUMAN	SPEKKATEDEGSEQKIPEATNRR		missed K-K@4; missed K-A@5; missed K-I@15; missed R-R@22	1	P01008
sp|P01008|ANT3_HUMAN	SPVDICTAKPR	Carbamidomethyl(C)@6	cleaved G-S@N-term	1	P01008
sp|P01008|ANT3_HUMAN	TSDQIHFFFAK			1	P01008
sp|P01008|ANT3_HUMAN	TSDQIHFFFAKLN	Carboxyethyl(K)@11	cleaved N-C@C-term; missed K-L@11	1	P01008
sp|P01008|ANT3_HUMAN	VAEGTQVLELPFK			1	P01008
sp|P01008|ANT3_HUMAN	VAEGTQVLELPFKGDDITMVLILPKPEK		missed K-G@13	1	P01008
sp|P01008|ANT3_HUMAN	VANPCVK	Carbamidomethyl(C)@5		1	P01008
sp|P01008|ANT3_HUMAN	VWELSK	Oxidation(W)@2		1	P01008
sp|P01008|ANT3_HUMAN	NRPFLVFIR		cleaved A-N@N-term	1	P01008
sp|P01008|ANT3_HUMAN	IEDGFSLK			1	P01008
sp|P01008|ANT3_HUMAN	PMNPMCIYRSPEKK	Carbamidomethyl(C)@6	cleaved I-P@N-term; missed R-S@9; missed K-K@13	1	P01008
sp|P01008|ANT3_HUMAN	SKFSPENTRKELFYK		missed K-F@2; missed R-K@9; missed K-E@10	1	P01008
sp|P01008|ANT3_HUMAN	KELFYKADGESCSASMMYQEGKFR	Carbamidomethyl(C)@12	missed K-E@1; missed K-A@6; missed K-F@22	1	P01008
sp|P01008|ANT3_HUMAN	VDICTAKPR	Carbamidomethyl(C)@4	cleaved P-V@N-term	1	P01008
sp|P01008|ANT3_HUMAN	VAEGTQVLELPFKGDDITMVLILPKPEKSLAK	Carbamidomethyl(K)@13	missed K-G@13; missed K-S@28	1	P01008
sp|P01008|ANT3_HUMAN	ATEDEGSEQKIPEATNRRVWELSK		missed K-I@10; missed R-R@17; missed R-V@18	1	P01008
sp|P01008|ANT3_HUMAN	ICTAKPR	Carbamidomethyl(C)@2	cleaved D-I@N-term	1	P01008
sp|P01008|ANT3_HUMAN	LNTIIFMGR		cleaved P-L@N-term	1	P01008
sp|P01008|ANT3_HUMAN	QQLMEVFKFDTISEKTSDQIHFFFAK	Deamidated(Q)@1; Deamidated(Q)@2	cleaved L-Q@N-term; missed K-F@8; missed K-T@15	1	P01008
sp|P01008|ANT3_HUMAN	SSKLVSANRLFGDK		missed K-L@3; missed R-L@9	1	P01008
sp|P01008|ANT3_HUMAN	ELFYK			NA, length less than 6
sp|P01008|ANT3_HUMAN	PMCIYR	Carbamidomethyl(C)@3	cleaved N-P@N-term	1	P01008
sp|P01008|ANT3_HUMAN	DIPMNPMCIYRSPEKKATEDEGSEQKIPEATNR	Deamidated(N)@5; Carbamidomethyl(C)@8	missed R-S@11; missed K-K@15; missed K-A@16; missed K-I@26	1	P01008
sp|P01008|ANT3_HUMAN	DIPMNPM		cleaved M-C@C-term	1	P01008
sp|P01008|ANT3_HUMAN	SANRLFGDK		cleaved V-S@N-term; missed R-L@4	1	P01008
sp|P01008|ANT3_HUMAN	ANRPFLVFI		cleaved I-R@C-term	1	P01008
sp|P01008|ANT3_HUMAN	TIIFMGR		cleaved N-T@N-term	2	Q99574, P01008
sp|P01008|ANT3_HUMAN	DICTAKPR	Carbamidomethyl(C)@3	cleaved V-D@N-term	1	P01008
sp|P01008|ANT3_HUMAN	FLVFIR		cleaved P-F@N-term	9	Q9BT67, Q8N755, Q8NGN1, Q9BRQ3, Q8WZ94, Q3KRA6, Q7Z3V4, P01008, Q15751
sp|P01008|ANT3_HUMAN	NETYQDISELVYGAKLQPLDFKENAEQSR		cleaved F-N@N-term; missed K-L@15; missed K-E@22	1	P01008
sp|P01008|ANT3_HUMAN	PRDIPMNPMCIYR	Oxidation(P)@1; Carbamidomethyl(C)@10	cleaved K-P@N-term; missed R-D@2	1	P01008
sp|P01008|ANT3_HUMAN	PLNTIIFMGRVAN	Deamidated(N)@13	cleaved V-P@N-term; cleaved N-P@C-term; missed R-V@10	1	P01008
sp|P01008|ANT3_HUMAN	IPMNPMCIYR	Carbamidomethyl(C)@7	cleaved D-I@N-term	1	P01008
sp|P01008|ANT3_HUMAN	LFGDKSLTF		cleaved F-N@C-term; missed K-S@5	1	P01008
sp|P01008|ANT3_HUMAN	AFLEVNEEGSEAAASTAVVIAGRSLNPNR	Phospho(S)@24; Deamidated(N)@28	missed R-S@23	1	P01008
sp|P01008|ANT3_HUMAN	CTAKPR	Carbamidomethyl(C)@1	cleaved I-C@N-term	2	P01008, Q14738
sp|P01008|ANT3_HUMAN	SKLPGIVAEGR		missed K-L@2	1	P01008
sp|P01008|ANT3_HUMAN	RPFLVFIR		cleaved N-R@N-term	1	P01008
sp|P01008|ANT3_HUMAN	RVTFKANRPFLVFIREVPLNTIIFMGR	Deamidated(R)@1; Deamidated(N)@7	cleaved N-R@N-term; missed R-V@1; missed K-A@5; missed R-E@15	1	P01008
sp|P01008|ANT3_HUMAN	SLLLIGFWDCVTCHGSPVDICTAKPRDIPMNPMCIYR	Carbamidomethyl(C)@10; Carbamidomethyl(C)@13; Carbamidomethyl(C)@21; Arg->Orn(R)@26; Carbamidomethyl(C)@34	cleaved L-S@N-term; missed R-D@26	1	P01008
sp|P01008|ANT3_HUMAN	VWELSKANSR	Dioxidation(W)@2; Deamidated(N)@8	missed K-A@6	1	P01008
sp|P02765|FETUA_HUMAN	AAAGPVVPPCPGR	Carbamidomethyl(C)@10	cleaved G-A@N-term	1	P02765
sp|P02765|FETUA_HUMAN	AALAAFNAQNNGSNFQLEEISR	Deamidated(N)@14		1	P02765
sp|P02765|FETUA_HUMAN	AGPVVPPCPGR	Carbamidomethyl(C)@8	cleaved A-A@N-term	1	P02765
sp|P02765|FETUA_HUMAN	AHYDLR			1	P02765
sp|P02765|FETUA_HUMAN	APHGPGLIYR		cleaved S-A@N-term	1	P02765
sp|P02765|FETUA_HUMAN	AQLVPLPPSTYVEFTVSGTDCVAK	Carbamidomethyl(C)@21		1	P02765
sp|P02765|FETUA_HUMAN	AQLVPLPPSTYVEFTVSGTDCVAKEATEAAK	Carbamidomethyl(C)@21	missed K-E@24	1	P02765
sp|P02765|FETUA_HUMAN	AQLVPLPPSTYVEFTVSGTDCVAKEATEAAKCNLLAEK	Carbamidomethyl(C)@21; Carbamidomethyl(C)@32	missed K-E@24; missed K-C@31	1	P02765
sp|P02765|FETUA_HUMAN	CNLLAEK	Carbamidomethyl(C)@1; Ammonia-loss(N)@2		1	P02765
sp|P02765|FETUA_HUMAN	CNLLAEKQYGFCK	Carbamidomethyl(C)@1; Ammonia-loss(N)@2; Carbamidomethyl(C)@12	missed K-Q@7	1	P02765
sp|P02765|FETUA_HUMAN	DFQLLKLDGK		cleaved C-D@N-term; missed K-L@6	1	P02765
sp|P02765|FETUA_HUMAN	EATEAAKCNLLAEK	Carbamidomethyl(C)@8	missed K-C@7	1	P02765
sp|P02765|FETUA_HUMAN	EATEAAKCNLLAEKQYGFCK	Carbamidomethyl(C)@8; Carbamidomethyl(C)@19	missed K-C@7; missed K-Q@14	1	P02765
sp|P02765|FETUA_HUMAN	EHAVEGDCDFQLLK	Carbamidomethyl(C)@8		1	P02765
sp|P02765|FETUA_HUMAN	EHAVEGDCDFQLLKLDGK	Carbamidomethyl(C)@8	missed K-L@14	1	P02765
sp|P02765|FETUA_HUMAN	FMGVVSLGSPSGEVSHPR		cleaved T-F@N-term	1	P02765
sp|P02765|FETUA_HUMAN	FSVVYAK			1	P02765
sp|P02765|FETUA_HUMAN	GPVVPPCPGR	Carbamidomethyl(C)@7	cleaved A-G@N-term	1	P02765
sp|P02765|FETUA_HUMAN	GVVSLGSPSGEVSHPR		cleaved M-G@N-term	1	P02765
sp|P02765|FETUA_HUMAN	HGPGLIYR		cleaved P-H@N-term	1	P02765
sp|P02765|FETUA_HUMAN	HGPGLIYRQPN		cleaved P-H@N-term; cleaved N-C@C-term; missed R-Q@8	1	P02765
sp|P02765|FETUA_HUMAN	HTFMGVVSLGSPSGEVSHP		cleaved P-R@C-term	1	P02765
sp|P02765|FETUA_HUMAN	HTFMGVVSLGSPSGEVSHPR			1	P02765
sp|P02765|FETUA_HUMAN	HTLNQIDEVK			1	P02765
sp|P02765|FETUA_HUMAN	IRHFKV		missed R-H@2; missed K-V@5	2	P02765, Q9H9Y6
sp|P02765|FETUA_HUMAN	LDGKFSVVYAK	Dehydrated(D)@2	missed K-F@4	1	P02765
sp|P02765|FETUA_HUMAN	MGVVSLGSPSGEVSHPR		cleaved F-M@N-term	1	P02765
sp|P02765|FETUA_HUMAN	PDAPPSPPLGAPGLPPAGSPPDSHVLLAAPPGHQLHR		cleaved D-P@N-term	1	P02765
sp|P02765|FETUA_HUMAN	PPDSHVLLAAPPGHQLHRAHYDLRHTFMGVVSLGSPSGEVSHPRKTRTVVQPSVGAAAGPVVPPCPGR	Carbamidomethyl(C)@65	cleaved S-P@N-term; missed R-A@18; missed R-H@24; missed R-K@44; missed K-T@45; missed R-T@47	1	P02765
sp|P02765|FETUA_HUMAN	PRKTRTVVQPSVGAAAGPVVPPCPGR	Deamidated(Q)@9; Oxidation(P)@10; Carbamidomethyl(C)@23	cleaved H-P@N-term; missed R-K@2; missed K-T@3; missed R-T@5	1	P02765
sp|P02765|FETUA_HUMAN	PSVGAAAGPVVPPCPGR	Carbamidomethyl(C)@14	cleaved Q-P@N-term	1	P02765
sp|P02765|FETUA_HUMAN	QLKEHAVEGDCDFQLLK	Gln->pyro-Glu@N-term; Carbamidomethyl(C)@11	missed K-E@3	1	P02765
sp|P02765|FETUA_HUMAN	QLKEHAVEGDCDFQLLKLDGK	Carbamidomethyl(C)@11	missed K-E@3; missed K-L@17	1	P02765
sp|P02765|FETUA_HUMAN	QYGFCK	Gln->pyro-Glu@N-term; Carbamidomethyl(C)@5		1	P02765
sp|P02765|FETUA_HUMAN	RHTFMGVVSLGSPSGEVSHPRKTRTVVQPSVGAAAGPVVPPCPGR	Delta:H(4)C(2)(K)@22; Carbamidomethyl(C)@42	cleaved L-R@N-term; missed R-H@1; missed R-K@21; missed K-T@22; missed R-T@24	1	P02765
sp|P02765|FETUA_HUMAN	SHPRKTRTVVQPSVGAAAGPVVPPCPGR	Arg->GluSA(R)@7; Carbamidomethyl(C)@25	cleaved V-S@N-term; missed R-K@4; missed K-T@5; missed R-T@7	1	P02765
sp|P02765|FETUA_HUMAN	SLGSPSGEVSHPR		cleaved V-S@N-term	1	P02765
sp|P02765|FETUA_HUMAN	SPSGEVSHPRKTRTVVQPSVGAAAGPVVPPCPGR	Phospho(S)@7; Deamidated(Q)@17; Carbamidomethyl(C)@31	cleaved G-S@N-term; missed R-K@10; missed K-T@11; missed R-T@13	1	P02765
sp|P02765|FETUA_HUMAN	SVGAAAGPVVPPCPGR	Carbamidomethyl(C)@13	cleaved P-S@N-term	1	P02765
sp|P02765|FETUA_HUMAN	TRTVVQPSVGAAAGPVVPPCPGR	Carbamyl@N-term; Dehydrated(T)@3; Oxidation(P)@7; Carbamidomethyl(C)@20	missed R-T@2	1	P02765
sp|P02765|FETUA_HUMAN	TVSGTDCVAKEATEAAK	Carbamidomethyl(C)@7	cleaved F-T@N-term; missed K-E@10	1	P02765
sp|P02765|FETUA_HUMAN	TVVQPSVGAAAGPVVPPCPGR	Carbamidomethyl(C)@18		1	P02765
sp|P02765|FETUA_HUMAN	TVVQPSVGAAAGPVVPPCPGRIR	Carbamidomethyl(C)@18	missed R-I@21	1	P02765
sp|P02765|FETUA_HUMAN	VQPSVGAAAGPVVPPCPGR	Carbamidomethyl(C)@16	cleaved V-V@N-term	1	P02765
sp|P02765|FETUA_HUMAN	VVQPSVGAAAGPVVPPCPGR	Carbamidomethyl(C)@17	cleaved T-V@N-term	1	P02765
sp|P02765|FETUA_HUMAN	HTFMGVVSLGSPSGEVSHPRKT		cleaved T-R@C-term; missed R-K@20; missed K-T@21	1	P02765
sp|P02765|FETUA_HUMAN	AAGPVVPPCPGR	Carbamidomethyl(C)@9	cleaved A-A@N-term	1	P02765
sp|P02765|FETUA_HUMAN	GSPSGEVSHPR		cleaved L-G@N-term	1	P02765
sp|P02765|FETUA_HUMAN	LDGKFSVVY		cleaved Y-A@C-term; missed K-F@4	1	P02765
sp|P02765|FETUA_HUMAN	HYDLR		cleaved A-H@N-term	NA, length less than 6
sp|P02765|FETUA_HUMAN	TVVQPSVGAAAGP		cleaved P-V@C-term	1	P02765
sp|P02765|FETUA_HUMAN	VLDPTPVAR		cleaved H-V@N-term	1	P02765
sp|P02765|FETUA_HUMAN	CDFQLLK	Carbamidomethyl(C)@1	cleaved D-C@N-term	1	P02765
sp|P02765|FETUA_HUMAN	HTFMGVVSLGSPSGEVSHPRKTRTVVQPSVGAAAGPVVPPCPGR	Carbamidomethyl(C)@41	missed R-K@20; missed K-T@21; missed R-T@23	1	P02765
sp|P02765|FETUA_HUMAN	PVVPPCPGR	Carbamidomethyl(C)@6	cleaved G-P@N-term	1	P02765
sp|P02765|FETUA_HUMAN	VVSLGSPSGEVSHPR		cleaved G-V@N-term	1	P02765
sp|P02765|FETUA_HUMAN	CDFQLLKLDGK	Carbamidomethyl(C)@1; Deamidated(Q)@4	cleaved D-C@N-term; missed K-L@7	1	P02765
sp|P02765|FETUA_HUMAN	RQLKEHAVEGDCDFQLLKLDGK	Carbamidomethyl(C)@12	cleaved V-R@N-term; missed R-Q@1; missed K-E@4; missed K-L@18	1	P02765
sp|P02765|FETUA_HUMAN	RQLKEHAVEGDCDFQLLK	Carbamidomethyl(C)@12	cleaved V-R@N-term; missed R-Q@1; missed K-E@4	1	P02765
sp|P02765|FETUA_HUMAN	FSVVY		cleaved Y-A@C-term	NA, length less than 6
sp|P02765|FETUA_HUMAN	QPSVGAAAGPVVPPCPGR	Gln->pyro-Glu@N-term; Carbamidomethyl(C)@15	cleaved V-Q@N-term	1	P02765
sp|P02765|FETUA_HUMAN	IDTLETTCHVLDPTPVARCSVRQLKEHAVEGDCDFQLLK	Carbamidomethyl(C)@8; Carbamidomethyl(C)@19; Carbamidomethyl(C)@33	cleaved E-I@N-term; missed R-C@18; missed R-Q@22; missed K-E@25	1	P02765
sp|P02765|FETUA_HUMAN	TPVARCSVRQLKEHAVEGDCDFQLLK	Carbamidomethyl@N-term; Carbamidomethyl(C)@6; Deamidated(Q)@10; Carbamidomethyl(C)@20	cleaved P-T@N-term; missed R-C@5; missed R-Q@9; missed K-E@12	1	P02765
sp|P02765|FETUA_HUMAN	CDSSPDSAEDVR	Carbamidomethyl(C)@1; Phospho(S)@7		1	P02765
sp|P02765|FETUA_HUMAN	CDSSPDSAEDVRK	Carbamidomethyl(C)@1; Phospho(S)@7	missed R-K@12	1	P02765
sp|P02765|FETUA_HUMAN	GSPSGEVSHPRKTRTVVQPSVGAAAGPVVPPCPGR	Carbamidomethyl(C)@32	cleaved L-G@N-term; missed R-K@11; missed K-T@12; missed R-T@14	1	P02765
sp|P02765|FETUA_HUMAN	AVEGDCDFQLLK	Carbamidomethyl(C)@6	cleaved H-A@N-term	1	P02765
sp|P02765|FETUA_HUMAN	TCHVLDPTPVARCSVRQLKEHAVEGDCDFQLLK	Carbamidomethyl(C)@2; Carbamidomethyl(C)@13; Carbamidomethyl(C)@27	cleaved T-T@N-term; missed R-C@12; missed R-Q@16; missed K-E@19	1	P02765
sp|P02765|FETUA_HUMAN	ARCSVRQLKEHAVEGDCDFQLLK	Carbamidomethyl(C)@3; GlnThrGlyGly(K)@9; Carbamidomethyl(C)@17	cleaved V-A@N-term; missed R-C@2; missed R-Q@6; missed K-E@9	1	P02765
sp|P02765|FETUA_HUMAN	LKEHAVEGDCDFQLLKLDGK	Carbamidomethyl@N-term; Carbamidomethyl(C)@10	cleaved Q-L@N-term; missed K-E@2; missed K-L@16	1	P02765
sp|P02765|FETUA_HUMAN	GSNFQLEEISR		cleaved N-G@N-term	1	P02765
sp|P02765|FETUA_HUMAN	VRQLKEHAVEGDCDFQLLKLDGK	Carbamidomethyl(C)@13	cleaved S-V@N-term; missed R-Q@2; missed K-E@5; missed K-L@19	1	P02765
sp|P02765|FETUA_HUMAN	VGAAAGPVVPPCPGR	Carbamidomethyl(C)@12	cleaved S-V@N-term	1	P02765
sp|P02765|FETUA_HUMAN	SRAQLVPLPPSTYVEFTVSGTDCVAKEATEAAK	Formyl@N-term; Carbamidomethyl(C)@23	cleaved I-S@N-term; missed R-A@2; missed K-E@26	1	P02765
sp|P02765|FETUA_HUMAN	RHTFMGVVSLGSPSGEVSHPR	Phospho(T)@3; Oxidation(M)@5	cleaved L-R@N-term; missed R-H@1	1	P02765
sp|P02765|FETUA_HUMAN	HTFMGVVS		cleaved S-L@C-term	1	P02765
sp|P02765|FETUA_HUMAN	PHGPGLIYR		cleaved A-P@N-term	1	P02765
sp|P02765|FETUA_HUMAN	TVVQPSVGAAAGPVV	Dehydrated(S)@6	cleaved V-P@C-term	1	P02765
sp|P02765|FETUA_HUMAN	NNGSNFQLEEISRAQLVPLPPSTYVEFTVSGTDCVAKEATEAAK	Carbamidomethyl(C)@34	cleaved Q-N@N-term; missed R-A@13; missed K-E@37	1	P02765
sp|P02765|FETUA_HUMAN	QLKEHAVEGDCDFQLLKLDGKFSVVYAKCDSSPDSAEDV	Gln->pyro-Glu@N-term; Carbamidomethyl(C)@11; Carbamidomethyl(C)@29	cleaved V-R@C-term; missed K-E@3; missed K-L@17; missed K-F@21; missed K-C@28	1	P02765
sp|P02765|FETUA_HUMAN	AVEGDCDFQLLKLDGK	Delta:H(2)C(2)@N-term; Carbamidomethyl(C)@6	cleaved H-A@N-term; missed K-L@12	1	P02765
sp|P02765|FETUA_HUMAN	SVVYAKCDSSPDSAEDVRK	Carbamidomethyl@N-term; Carbamidomethyl(C)@7	cleaved F-S@N-term; missed K-C@6; missed R-K@18	1	P02765
sp|P02765|FETUA_HUMAN	AALAAF		cleaved F-N@C-term	17	P08912, Q96DZ9, Q13423, Q7Z628, Q7Z2D5, Q6ZT52, Q99571, O60508, P15514, Q2T9J0, P59536, Q99932, Q8WZ82, Q96HE8, O95926, P02765, Q15393
sp|P02765|FETUA_HUMAN	AGSPPDSHVLLAAPPGHQLHR	Methyl(H)@8	cleaved P-A@N-term	1	P02765
sp|P02765|FETUA_HUMAN	ETTCHVLDPTPVAR	Carbamidomethyl(C)@4	cleaved L-E@N-term	1	P02765
sp|P02765|FETUA_HUMAN	HQLHRAHYDLRHTFMGVVSLGSPSGEVSHPRKTRTVVQPSVGAAAGPVVPPCPGR	Carbamidomethyl(C)@52	cleaved G-H@N-term; missed R-A@5; missed R-H@11; missed R-K@31; missed K-T@32; missed R-T@34	1	P02765
sp|P02765|FETUA_HUMAN	PPGHQLHRAHYDLRHTFMGVVSLGSPSGEVSHPR	Met->Hcy(M)@18	cleaved A-P@N-term; missed R-A@8; missed R-H@14	1	P02765
sp|P02765|FETUA_HUMAN	RTVVQPSVGAAAGPVVPPCPGR	GlyGly(S)@7; Carbamidomethyl(C)@19	cleaved T-R@N-term; missed R-T@1	1	P02765
sp|P02765|FETUA_HUMAN	VSLGSPSGEVSHPR		cleaved V-V@N-term	1	P02765
sp|P02749|APOH_HUMAN	AGILENGAVR		cleaved F-A@N-term	1	P02749
sp|P02749|APOH_HUMAN	ATFGCHDGYSLDGPEEIECTK	Carbamidomethyl(C)@5; Carbamidomethyl(C)@19		1	P02749
sp|P02749|APOH_HUMAN	ATVVYQGER			1	P02749
sp|P02749|APOH_HUMAN	CFKEHSSLAFWK	Carbamidomethyl(C)@1	missed K-E@3	1	P02749
sp|P02749|APOH_HUMAN	CPFAGILENGAVR	Carbamidomethyl(C)@1	cleaved V-C@N-term	1	P02749
sp|P02749|APOH_HUMAN	CPFPSRPDNGFVNYPAKPTLYYK	Carbamidomethyl(C)@1		1	P02749
sp|P02749|APOH_HUMAN	CPFPSRPDNGFVNYPAKPTLYYKDK	Carbamidomethyl(C)@1	missed K-D@23	1	P02749
sp|P02749|APOH_HUMAN	CSYTEDAQCIDGTIEVPK	Carbamidomethyl(C)@1; Dehydrated(T)@4; Deamidated(Q)@8; Carbamidomethyl(C)@9		1	P02749
sp|P02749|APOH_HUMAN	CSYTEDAQCIDGTIEVPKCFK	Carbamidomethyl(C)@1; Carbamidomethyl(C)@9; Carbamidomethyl(C)@19	missed K-C@18	1	P02749
sp|P02749|APOH_HUMAN	CTEEGKWSPELPVCAPIICPPPSIPTFATLR	Carbamidomethyl(C)@1; Carbamidomethyl(C)@14; Carbamidomethyl(C)@19	missed K-W@6	1	P02749
sp|P02749|APOH_HUMAN	CTPRVCPFAGILENGAVR	Carbamidomethyl(C)@1; Dimethyl(R)@4; Carbamidomethyl(C)@6	missed R-V@4	1	P02749
sp|P02749|APOH_HUMAN	DKATFGCHDGYSLDGPEEIECTK	Carbamidomethyl(C)@7; Carbamidomethyl(C)@21	missed K-A@2	1	P02749
sp|P02749|APOH_HUMAN	EHSSLAFWK			1	P02749
sp|P02749|APOH_HUMAN	EHSSLAFWKTDASDVKPC	Carbamidomethyl(C)@18	missed K-T@9	1	P02749
sp|P02749|APOH_HUMAN	EKKCSYTEDAQCIDGTIEVPK	Carbamidomethyl(C)@4; Carbamidomethyl(C)@12	missed K-K@2; missed K-C@3	1	P02749
sp|P02749|APOH_HUMAN	EVKCPFPSRPDNGFVNYPAKPTLYYK	Carbamidomethyl(C)@4	missed K-C@3	1	P02749
sp|P02749|APOH_HUMAN	EVKCPFPSRPDNGFVNYPAKPTLYYKDK	Carbamidomethyl(C)@4	missed K-C@3; missed K-D@26	1	P02749
sp|P02749|APOH_HUMAN	FAGILENGAVR		cleaved P-F@N-term	1	P02749
sp|P02749|APOH_HUMAN	FICPLTGLWPINTLK	Carbamidomethyl(C)@3		1	P02749
sp|P02749|APOH_HUMAN	FKNGMLHGDK		missed K-N@2	1	P02749
sp|P02749|APOH_HUMAN	FKNGMLHGDKVSFFCK	Carbamidomethyl(C)@15	missed K-N@2; missed K-V@10	1	P02749
sp|P02749|APOH_HUMAN	FPSRPDNGFVNYPAKPTLYYKDK		cleaved P-F@N-term; missed K-D@21	1	P02749
sp|P02749|APOH_HUMAN	GRTCPKPDDLPFSTVVPLK	Carbamidomethyl(C)@4	cleaved A-G@N-term; missed R-T@2	1	P02749
sp|P02749|APOH_HUMAN	GRTCPKPDDLPFSTVVPLKTFYEPGEEITYSCKPGYVSR	Carbamidomethyl(C)@4; Carbamidomethyl(C)@32	cleaved A-G@N-term; missed R-T@2; missed K-T@19	1	P02749
sp|P02749|APOH_HUMAN	KATVVYQGER		missed K-A@1	1	P02749
sp|P02749|APOH_HUMAN	KCSYTEDAQCIDGTIEVPK	Carbamidomethyl(C)@2; Carbamidomethyl(C)@10	missed K-C@1	1	P02749
sp|P02749|APOH_HUMAN	KCSYTEDAQCIDGTIEVPKCFK	Carbamidomethyl(C)@2; Carbamidomethyl(C)@10; Carbamidomethyl(C)@20	missed K-C@1; missed K-C@19	1	P02749
sp|P02749|APOH_HUMAN	KCSYTEDAQCIDGTIEVPKCFKEHSSLAFWK	Carbamidomethyl(C)@2; Carbamidomethyl(C)@10; Carbamidomethyl(C)@20	missed K-C@1; missed K-C@19; missed K-E@22	1	P02749
sp|P02749|APOH_HUMAN	KFICPLTGLWPINTLK	Carbamidomethyl(C)@4	missed K-F@1	1	P02749
sp|P02749|APOH_HUMAN	LGNWSAMPSCK	Carbamidomethyl(C)@10		1	P02749
sp|P02749|APOH_HUMAN	NGMLHGDKVSFFCK	Carbamidomethyl(C)@13	missed K-V@8	1	P02749
sp|P02749|APOH_HUMAN	PDDLPFSTVVPLKTFY	Carbamidomethyl(K)@13	cleaved K-P@N-term; cleaved Y-E@C-term; missed K-T@13	1	P02749
sp|P02749|APOH_HUMAN	PKCFKEHSSLAFWK	Oxidation(P)@1; Carbamidomethyl(C)@3	cleaved V-P@N-term; missed K-C@2; missed K-E@5	1	P02749
sp|P02749|APOH_HUMAN	PRVCPFAGILENGAVR	Carbamidomethyl(C)@4; Deamidated(N)@12	cleaved T-P@N-term; missed R-V@2	1	P02749
sp|P02749|APOH_HUMAN	SCNTGFYLNGADSAK	Carbamidomethyl(C)@2	cleaved F-S@N-term	1	P02749
sp|P02749|APOH_HUMAN	SLDGPEEIECTK	Carbamidomethyl(C)@10	cleaved Y-S@N-term	1	P02749
sp|P02749|APOH_HUMAN	SRPDNGFVNYPAKPTLYYK		cleaved P-S@N-term	1	P02749
sp|P02749|APOH_HUMAN	TCPKPDDLPFSTVVPLK	Carbamidomethyl(C)@2		1	P02749
sp|P02749|APOH_HUMAN	TCPKPDDLPFSTVVPLKTFYEPGEEITYSCKPGYVSR	Carbamidomethyl(C)@2; Carbamidomethyl(C)@30	missed K-T@17	1	P02749
sp|P02749|APOH_HUMAN	TDASDVKPC	Carbamidomethyl(C)@9		1	P02749
sp|P02749|APOH_HUMAN	TFYEPGEEITYSCKPGYVSR	Carbamidomethyl(C)@13		1	P02749
sp|P02749|APOH_HUMAN	TGLWPINTLK		cleaved L-T@N-term	1	P02749
sp|P02749|APOH_HUMAN	VCPFAGILENGAVR	Carbamidomethyl(C)@2		1	P02749
sp|P02749|APOH_HUMAN	SLAFWK		cleaved S-S@N-term	1	P02749
sp|P02749|APOH_HUMAN	SRPDNGFVNYPAKPTLYYKDK		cleaved P-S@N-term; missed K-D@19	1	P02749
sp|P02749|APOH_HUMAN	ASCKVPVKKATVVYQGER	Carbamidomethyl(C)@3	missed K-V@4; missed K-K@8; missed K-A@9	1	P02749
sp|P02749|APOH_HUMAN	SSLAFWK		cleaved H-S@N-term	1	P02749
sp|P02749|APOH_HUMAN	TFYEPGEEITYSCK	Carbamidomethyl(C)@13	cleaved K-P@C-term	1	P02749
sp|P02749|APOH_HUMAN	KCSYTEDAQCIDGTIEVPKCFKEHSSLAFWKTDASDVKPC	Carbamidomethyl(C)@2; Carbamidomethyl(C)@10; Carbamidomethyl(C)@20; Carbamidomethyl(C)@40	missed K-C@1; missed K-C@19; missed K-E@22; missed K-T@31	1	P02749
sp|P02749|APOH_HUMAN	WKTDASDVKPC	Carbamidomethyl(C)@11	cleaved F-W@N-term; missed K-T@2	1	P02749
sp|P02749|APOH_HUMAN	YTTFEYPNTISF		cleaved F-S@C-term	1	P02749
sp|P02749|APOH_HUMAN	KFICPLTGLWPINTLKCTPRVCPFAGILENGAVR	Carbamidomethyl(C)@4; Hex(N)@13; Carbamidomethyl(C)@17; Carbamidomethyl(C)@22	missed K-F@1; missed K-C@16; missed R-V@20	1	P02749
sp|P02749|APOH_HUMAN	VSFFCK	Carbamidomethyl(C)@5		2	Q5T4S7, P02749
sp|P02749|APOH_HUMAN	CFKEHSSLAFWKTDASDVKPC	Carbamidomethyl(C)@1; Carbamidomethyl(C)@21	missed K-E@3; missed K-T@12	1	P02749
sp|P02749|APOH_HUMAN	NKEKKCSYTEDAQCIDGTIEVPK	Carbamidomethyl(C)@6; Carboxy(E)@10; Carbamidomethyl(C)@14	missed K-E@2; missed K-K@4; missed K-C@5	1	P02749
sp|P02749|APOH_HUMAN	CPFPSRPDNGFVNYPAKPTLYYKDKATFGCHDGYSLDGPEEIECTK	Carbamidomethyl(C)@1; Deoxy(D)@8; Carbamidomethyl(C)@30; Carbamidomethyl(C)@44	missed K-D@23; missed K-A@25	1	P02749
sp|P02749|APOH_HUMAN	PDNGFVNYPAKPTLYYKDK	Deamidated(N)@7	cleaved R-P@N-term; missed K-D@17	1	P02749
sp|P02749|APOH_HUMAN	KFICPL	Carbamidomethyl(C)@4	cleaved L-T@C-term; missed K-F@1	4	P29375, Q9BY66, P02749, P41229
sp|P02749|APOH_HUMAN	TGFYLNGADSAK		cleaved N-T@N-term	1	P02749
sp|P02749|APOH_HUMAN	KTFYEPGEEITYSCKPGYVSR	Carbamidomethyl(C)@14	cleaved L-K@N-term; missed K-T@1	1	P02749
sp|P02749|APOH_HUMAN	GLWPINTLKCTPRVCPFAGILENGAVR	Formyl@N-term; Deamidated(N)@6; Carbamidomethyl(C)@10; Carbamidomethyl(C)@15	cleaved T-G@N-term; missed K-C@9; missed R-V@13	1	P02749
sp|P02749|APOH_HUMAN	PLTGLWPINTLKCTPRVCPFAGILENGAVR	Arg-add@N-term; Carbamidomethyl(C)@13; Oxidation(P)@15; Carbamidomethyl(C)@18	cleaved C-P@N-term; missed K-C@12; missed R-V@16	1	P02749
sp|P02749|APOH_HUMAN	ICPLTGLWPINTLKCTPRVCPFAGILENGAVR	Carbamidomethyl(C)@2; Trp->Hydroxykynurenin(W)@8; Deamidated(N)@11; Carbamidomethyl(C)@15; Carbamidomethyl(C)@20	cleaved F-I@N-term; missed K-C@14; missed R-V@18	1	P02749
sp|P02749|APOH_HUMAN	LKTFYEPGEEITYSCKPGYVSR	Carbamidomethyl@N-term; Carbamidomethyl(C)@15	cleaved P-L@N-term; missed K-T@2	1	P02749
sp|P10643|CO7_HUMAN	AASGTQNNVLRGEPFIR		missed R-G@11	1	P10643
sp|P10643|CO7_HUMAN	ACGACPLWGK	Carbamidomethyl(C)@2; Carbamidomethyl(C)@5		1	P10643
sp|P10643|CO7_HUMAN	ACGACPLWGKCDAESSK	Carbamidomethyl(C)@2; Carbamidomethyl(C)@5; Carbamidomethyl(C)@11	missed K-C@10	1	P10643
sp|P10643|CO7_HUMAN	CFSGQCISK	Carbamidomethyl(C)@1; Dehydrated(S)@3; Deamidated(Q)@5; Carbamidomethyl(C)@6		1	P10643
sp|P10643|CO7_HUMAN	CRGQSISVTSIRPCAAETQ	Carbamidomethyl(C)@1; Deamidated(Q)@4; Dehydrated(S)@5; Carbamidomethyl(C)@14	missed R-G@2	1	P10643
sp|P10643|CO7_HUMAN	CVCKMPYECGPSLDVCAQDER	Carbamidomethyl(C)@1; Carbamidomethyl(C)@3; Carbamidomethyl(C)@9; Carbamidomethyl(C)@16	missed K-M@4	1	P10643
sp|P10643|CO7_HUMAN	CVQKENPLTQAVPK	Carbamidomethyl(C)@1; Deamidated(Q)@3; Dehydrated(E)@5	missed K-E@4	1	P10643
sp|P10643|CO7_HUMAN	DGFVQDEGTMFPVGK			1	P10643
sp|P10643|CO7_HUMAN	DSCTLPASAEK	Carbamidomethyl(C)@3		1	P10643
sp|P10643|CO7_HUMAN	DSCTLPASAEKACGACPLWGK	Carbamidomethyl(C)@3; Carbamidomethyl(C)@13; Carbamidomethyl(C)@16	missed K-A@11	1	P10643
sp|P10643|CO7_HUMAN	DSCTLPASAEKACGACPLWGKCDAESSK	Carbamidomethyl(C)@3; Carbamidomethyl(C)@13; Carbamidomethyl(C)@16; Carbamidomethyl(C)@22	missed K-A@11; missed K-C@21	1	P10643
sp|P10643|CO7_HUMAN	ENPLTQAVPK			1	P10643
sp|P10643|CO7_HUMAN	EQTMSECEAGALR	Carbamidomethyl(C)@7		1	P10643
sp|P10643|CO7_HUMAN	FRCFSGQCISK	Carbamidomethyl(C)@3; Carbamidomethyl(C)@8	missed R-C@2	1	P10643
sp|P10643|CO7_HUMAN	FSSHGCKELENALK	Carbamidomethyl(C)@6	missed K-E@7	1	P10643
sp|P10643|CO7_HUMAN	GGGAGFISGLSYLELDNPAGNKR		missed K-R@22	1	P10643
sp|P10643|CO7_HUMAN	GGGAGFISGLSYLELDNPAGNKRR		missed K-R@22; missed R-R@23	1	P10643
sp|P10643|CO7_HUMAN	GQSISVTSIRPC	Carbamidomethyl(C)@12	cleaved C-A@C-term	1	P10643
sp|P10643|CO7_HUMAN	GQSISVTSIRPCAAET	Carbamidomethyl(C)@12	cleaved T-Q@C-term	1	P10643
sp|P10643|CO7_HUMAN	GQSISVTSIRPCAAETQ	Carbamidomethyl(C)@12		1	P10643
sp|P10643|CO7_HUMAN	IACVLPVLMDGIQSHPQKPFYTVGEK	Carbamidomethyl(C)@3		1	P10643
sp|P10643|CO7_HUMAN	ILPLTVCK	Carbamidomethyl(C)@7		1	P10643
sp|P10643|CO7_HUMAN	KVFSGDGKDFYR		missed K-V@1; missed K-D@8	1	P10643
sp|P10643|CO7_HUMAN	LSGNVLSYTFQVK			1	P10643
sp|P10643|CO7_HUMAN	LTPLYELVK			1	P10643
sp|P10643|CO7_HUMAN	LTPLYELVKEVPCASVK	Carbamidomethyl(C)@13	missed K-E@9	1	P10643
sp|P10643|CO7_HUMAN	MPYECGPSLDVCAQDER	Carbamidomethyl(C)@5; Carbamidomethyl(C)@12		1	P10643
sp|P10643|CO7_HUMAN	NVVYTCNEGYSLIGNPVAR	Carbamidomethyl(C)@6		1	P10643
sp|P10643|CO7_HUMAN	QKLTPLYELVK		missed K-L@2	1	P10643
sp|P10643|CO7_HUMAN	RILPLTVCK	Carbamidomethyl(C)@8	missed R-I@1	1	P10643
sp|P10643|CO7_HUMAN	RPSCDIDKPPPNIELTGNGYNELTGQFR	Carbamidomethyl(C)@4		1	P10643
sp|P10643|CO7_HUMAN	SCVGETTESTQCEDEELEHLR	Carbamidomethyl(C)@2; Carbamidomethyl(C)@12		1	P10643
sp|P10643|CO7_HUMAN	SLVCNGDSDCDEDSADEDRCEDSER	Carbamidomethyl(C)@4; Carbamidomethyl(C)@10; Carbamidomethyl(C)@20	missed R-C@19	1	P10643
sp|P10643|CO7_HUMAN	SLVCNGDSDCDEDSADEDRCEDSERRPSCDIDKPPPNIELTGNGYNELTGQFR	Carbamidomethyl(C)@4; Carbamidomethyl(C)@10; Carbamidomethyl(C)@20; Carbamidomethyl(C)@29	missed R-C@19; missed R-R@25	1	P10643
sp|P10643|CO7_HUMAN	SSGWHFVVK			1	P10643
sp|P10643|CO7_HUMAN	SVAVYGQYGGQPCVGNAFETQSCEPTR	Carbamidomethyl(C)@13; Carbamidomethyl(C)@23		1	P10643
sp|P10643|CO7_HUMAN	SVAVYGQYGGQPCVGNAFETQSCEPTRGCPTEEGCGER	Carbamidomethyl(C)@13; Deamidated(N)@16; Carbamidomethyl(C)@23; Carbamidomethyl(C)@29; Carbamidomethyl(C)@35	missed R-G@27	1	P10643
sp|P10643|CO7_HUMAN	VFSGDGKDFYR		missed K-D@7	1	P10643
sp|P10643|CO7_HUMAN	VLFYVDSEK			1	P10643
sp|P10643|CO7_HUMAN	VTVSCSGGMSLEGPSAFLCGSSLK	Carbamidomethyl@N-term; Carbamidomethyl(C)@5; Carbamidomethyl(C)@19		1	P10643
sp|P10643|CO7_HUMAN	WLVGEMHCQK	Carbamidomethyl(C)@8		1	P10643
sp|P10643|CO7_HUMAN	YECGPSLDVCAQDER	Carbamidomethyl(C)@3; Carbamidomethyl(C)@10	cleaved P-Y@N-term	1	P10643
sp|P10643|CO7_HUMAN	YSAWAESVTNLPQVIK			1	P10643
sp|P10643|CO7_HUMAN	ACGACPLWGKCDAESSKCVCR	Carbamidomethyl(C)@2; Carbamidomethyl(C)@5; Carbamidomethyl(C)@11; Carbamidomethyl(C)@18; Carbamidomethyl(C)@20	missed K-C@10; missed K-C@17	1	P10643
sp|P10643|CO7_HUMAN	CVLPVLMDGIQSHPQKPFYTVGEK	Carbamidomethyl(C)@1	cleaved A-C@N-term	1	P10643
sp|P10643|CO7_HUMAN	SVAVYGQYGGQPCVGNAFETQSCEPTRGCPTEEGCGERFR	Carbamidomethyl(C)@13; Carbamidomethyl(C)@23; Carbamidomethyl(C)@29; Carbamidomethyl(C)@35	missed R-G@27; missed R-F@38	1	P10643
sp|P10643|CO7_HUMAN	YSAWAESVTNLPQVIKQK		missed K-Q@16	1	P10643
sp|P10643|CO7_HUMAN	GCPTEEGCGERFR	Carbamidomethyl(C)@2; Carbamidomethyl(C)@8	missed R-F@11	1	P10643
sp|P10643|CO7_HUMAN	WSPEMK			1	P10643
sp|P10643|CO7_HUMAN	CRGQSISVTSIRPCAAET	Carbamidomethyl(C)@1; Deamidated(Q)@4; Dehydrated(S)@5; Carbamidomethyl(C)@14	cleaved T-Q@C-term; missed R-G@2	1	P10643
sp|P10643|CO7_HUMAN	LTPLYELVKEVPCASVKK	Carbamidomethyl(C)@13	missed K-E@9; missed K-K@17	1	P10643
sp|P10643|CO7_HUMAN	GEPFIR			5	Q15468, Q8WXG1, P18283, P10643, Q7LBC6
sp|P10643|CO7_HUMAN	PALKDGFVQDEGTMFPVGKNVVYTCNEGYSLIGNPVAR	Phospho(T)@24; Carbamidomethyl(C)@25	cleaved P-P@N-term; missed K-D@4; missed K-N@19	1	P10643
sp|P10643|CO7_HUMAN	VGEMHCQK	Carbamidomethyl(C)@6	cleaved L-V@N-term	1	P10643
sp|P10643|CO7_HUMAN	LVGEMHCQK	Carbamidomethyl(C)@7	cleaved W-L@N-term	1	P10643
sp|P10643|CO7_HUMAN	FSGQCISK	Carbamidomethyl(C)@5	cleaved C-F@N-term	1	P10643
sp|P10643|CO7_HUMAN	SLVPTEFCPSPPALKDGFVQDEGTMFPVGK	Carbamidomethyl(C)@8	cleaved L-S@N-term; missed K-D@15	1	P10643
sp|P02748|CO9_HUMAN	AIEDYINEFSVR			1	P02748
sp|P02748|CO9_HUMAN	AIEDYINEFSVRK		missed R-K@12	1	P02748
sp|P02748|CO9_HUMAN	CLCACPFK	Carbamidomethyl(C)@1; Carbamidomethyl(C)@3; Carbamidomethyl(C)@5		1	P02748
sp|P02748|CO9_HUMAN	CLCACPFKFEGIACEISK	Carbamidomethyl(C)@1; Carbamidomethyl(C)@3; Carbamidomethyl(C)@5; Carbamidomethyl(C)@14	missed K-F@8	1	P02748
sp|P02748|CO9_HUMAN	CLCACPFKFEGIACEISKQK	Carbamidomethyl(C)@1; Carbamidomethyl(C)@3; Carbamidomethyl(C)@5; Carbamidomethyl(C)@14	missed K-F@8; missed K-Q@18	1	P02748
sp|P02748|CO9_HUMAN	CNGDNDCGDFSDEDDCESEPRPPCR	Carbamidomethyl(C)@1; Ammonia-loss(N)@2; Deamidated(N)@5; Carbamidomethyl(C)@7; Carbamidomethyl(C)@16; Carbamidomethyl(C)@24		1	P02748
sp|P02748|CO9_HUMAN	CNGDNDCGDFSDEDDCESEPRPPCRDR	Carbamidomethyl(C)@1; Deamidated(N)@2; Carbamidomethyl(C)@7; Carbamidomethyl(C)@16; Carbamidomethyl(C)@24; Dehydrated(D)@26	missed R-D@25	1	P02748
sp|P02748|CO9_HUMAN	CTDAVGDRRQCVPTEPCEDAEDDCGNDFQCSTGR	Carbamidomethyl(C)@1; Carbamidomethyl(C)@11; Carbamidomethyl(C)@17; Carbamidomethyl(C)@24; Carbamidomethyl(C)@30	missed R-R@8; missed R-Q@9	1	P02748
sp|P02748|CO9_HUMAN	DGNTLTYYR			1	P02748
sp|P02748|CO9_HUMAN	DRDGNTLTYYR		missed R-D@2	1	P02748
sp|P02748|CO9_HUMAN	DRVVEESELAR		missed R-V@2	1	P02748
sp|P02748|CO9_HUMAN	FEGIACEISK	Carbamidomethyl(C)@6		1	P02748
sp|P02748|CO9_HUMAN	FTPTETNKAEQCCEETASSISLHGK	Carbamidomethyl(C)@12; Carbamidomethyl(C)@13	missed K-A@8	1	P02748
sp|P02748|CO9_HUMAN	ISEGLPALEFPN		cleaved N-E@C-term	1	P02748
sp|P02748|CO9_HUMAN	ISEGLPALEFPNE		cleaved E-K@C-term	1	P02748
sp|P02748|CO9_HUMAN	ISEGLPALEFPNEK			1	P02748
sp|P02748|CO9_HUMAN	KCHTCQNGGTVILMDGK	Carbamidomethyl(C)@2; Carbamidomethyl(C)@5; Deamidated(Q)@6	missed K-C@1	1	P02748
sp|P02748|CO9_HUMAN	LMDGKCLCACPFKFEGIACEISK	Carbamidomethyl(C)@6; Carbamidomethyl(C)@8; Carbamidomethyl(C)@10; Carbamidomethyl(C)@19	cleaved I-L@N-term; missed K-C@5; missed K-F@13	1	P02748
sp|P02748|CO9_HUMAN	LRCNGDNDCGDFSDEDDCESEPRPPCR	Carbamidomethyl(C)@3; Carbamidomethyl(C)@9; Carbamidomethyl(C)@18; Carbamidomethyl(C)@26	missed R-C@2	1	P02748
sp|P02748|CO9_HUMAN	LRCNGDNDCGDFSDEDDCESEPRPPCRDR	Carbamidomethyl(C)@3; Carbamidomethyl(C)@9; Carbamidomethyl(C)@18; Carbamidomethyl(C)@26	missed R-C@2; missed R-D@27	1	P02748
sp|P02748|CO9_HUMAN	LRCNGDNDCGDFSDEDDCESEPRPPCRDRVVEESELAR	Carbamidomethyl(C)@3; Carbamidomethyl(C)@9; Carbamidomethyl(C)@18; Carbamidomethyl(C)@26	missed R-C@2; missed R-D@27; missed R-V@29	1	P02748
sp|P02748|CO9_HUMAN	LSPIYNLVPVK			1	P02748
sp|P02748|CO9_HUMAN	LSPIYNLVPVKMK		missed K-M@11	1	P02748
sp|P02748|CO9_HUMAN	NRDVVLTTTFVDDIK		missed R-D@2	1	P02748
sp|P02748|CO9_HUMAN	PELTESSGSASHIDCR	Carbamidomethyl(C)@15	cleaved D-P@N-term	1	P02748
sp|P02748|CO9_HUMAN	QCVPTEPCEDAEDDCGNDFQCSTGR	Carbamidomethyl(C)@2; Carbamidomethyl(C)@8; Carbamidomethyl(C)@15; Carbamidomethyl(C)@21		1	P02748
sp|P02748|CO9_HUMAN	QKISEGLPALEFPN	Gln->pyro-Glu@N-term	cleaved N-E@C-term; missed K-I@2	1	P02748
sp|P02748|CO9_HUMAN	QKISEGLPALEFPNE	Gln->pyro-Glu@N-term	cleaved E-K@C-term; missed K-I@2	1	P02748
sp|P02748|CO9_HUMAN	QKISEGLPALEFPNEK		missed K-I@2	1	P02748
sp|P02748|CO9_HUMAN	RPWNVASLIYETK			1	P02748
sp|P02748|CO9_HUMAN	RQCVPTEPCEDAEDDCGNDFQCSTGR	Carbamidomethyl(C)@3; Carbamidomethyl(C)@9; Carbamidomethyl(C)@16; Carbamidomethyl(C)@22	missed R-Q@1	1	P02748
sp|P02748|CO9_HUMAN	SIEVFGQFNGK			1	P02748
sp|P02748|CO9_HUMAN	SIEVFGQFNGKR		missed K-R@11	1	P02748
sp|P02748|CO9_HUMAN	SRSIEVFGQFNGKR		missed R-S@2; missed K-R@13	1	P02748
sp|P02748|CO9_HUMAN	TEHYEEQIEAFK			1	P02748
sp|P02748|CO9_HUMAN	TEHYEEQIEAFKSIIQEK		missed K-S@12	1	P02748
sp|P02748|CO9_HUMAN	TSNFNAAISLK			1	P02748
sp|P02748|CO9_HUMAN	TTSYDPELTESSGSASHIDCRMSPWSEWSQCDPCLR	Carbamidomethyl(C)@20; Carbamidomethyl(C)@31; Carbamidomethyl(C)@34	cleaved Y-T@N-term; missed R-M@21	1	P02748
sp|P02748|CO9_HUMAN	VVEESELAR			1	P02748
sp|P02748|CO9_HUMAN	WNVASLIYETK	Dioxidation(W)@1	cleaved P-W@N-term	1	P02748
sp|P02748|CO9_HUMAN	WNVASLIYETKGEK		cleaved P-W@N-term; missed K-G@11	1	P02748
sp|P02748|CO9_HUMAN	YAFELK			4	Q8TED1, Q96BY6, P02748, Q15835
sp|P02748|CO9_HUMAN	YAFELKEK		missed K-E@6	1	P02748
sp|P02748|CO9_HUMAN	YDPELTESSGSASHIDCR	Carbamidomethyl(C)@17	cleaved S-Y@N-term	1	P02748
sp|P02748|CO9_HUMAN	KFEGIACEISK	Carbamidomethyl(C)@7	cleaved F-K@N-term; missed K-F@1	1	P02748
sp|P02748|CO9_HUMAN	KYAFELK		missed K-Y@1	2	Q96BY6, P02748
sp|P02748|CO9_HUMAN	NFRTEHYEEQIEAFK		missed R-T@3	1	P02748
sp|P02748|CO9_HUMAN	EVFGQFNGKR		cleaved I-E@N-term; missed K-R@9	1	P02748
sp|P02748|CO9_HUMAN	CNGDNDCGDFSDEDDCESEPRPPCRDRVVEESELAR	Carbamidomethyl(C)@1; Ammonia-loss(N)@2; Carbamidomethyl(C)@7; Carbamidomethyl(C)@16; Carbamidomethyl(C)@24	missed R-D@25; missed R-V@27	1	P02748
sp|P02748|CO9_HUMAN	SIEVFGQFNGKRCTDAVGDRRQCVPTEPCEDAEDDCGNDFQCSTGR	Carbamidomethyl(C)@13; Carbamidomethyl(C)@23; Carbamidomethyl(C)@29; Carbamidomethyl(C)@36; Deamidated(N)@38; Carbamidomethyl(C)@42	missed K-R@11; missed R-C@12; missed R-R@20; missed R-Q@21	1	P02748
sp|P02748|CO9_HUMAN	ELTESSGSASHIDCR	Carbamidomethyl(C)@14	cleaved P-E@N-term	1	P02748
sp|P02748|CO9_HUMAN	GVELK			NA, length less than 6
sp|P02748|CO9_HUMAN	RKCHTCQNGGTVILMDGK	Carbamidomethyl(C)@3; Carbamidomethyl(C)@6	cleaved V-R@N-term; missed R-K@1; missed K-C@2	1	P02748
sp|P02748|CO9_HUMAN	CHTCQNGGTVILMDGK	Carbamidomethyl(C)@1; Carbamidomethyl(C)@4; dHex(T)@9		1	P02748
sp|P02748|CO9_HUMAN	VRKCHTCQNGGTVILMDGKCLCACPFKFEGIACEISK	Carbamidomethyl(C)@4; Carbamidomethyl(C)@7; Carbamidomethyl(C)@20; Carbamidomethyl(C)@22; Carbamidomethyl(C)@24; Carbamidomethyl(C)@33	cleaved S-V@N-term; missed R-K@2; missed K-C@3; missed K-C@19; missed K-F@27	1	P02748
sp|P02748|CO9_HUMAN	MSPWSEWSQCDPCLR	Oxidation(M)@1; Hex(W)@4; Carbamidomethyl(C)@10; Carbamidomethyl(C)@13		1	P02748
sp|P02671|FIBA_HUMAN	ADSGEGDFLAEGGGVR		cleaved T-A@N-term	1	P02671
sp|P02671|FIBA_HUMAN	ADSGEGDFLAEGGGVRGPR		cleaved T-A@N-term; missed R-G@16	1	P02671
sp|P02671|FIBA_HUMAN	ALTDMPQMR			1	P02671
sp|P02671|FIBA_HUMAN	DEAAFFDTASTGK		cleaved P-D@N-term	1	P02671
sp|P02671|FIBA_HUMAN	DSDWPFCSDEDWNYK	Carbamidomethyl(C)@7		1	P02671
sp|P02671|FIBA_HUMAN	DSGEGDFLAEGGGVR		cleaved A-D@N-term	1	P02671
sp|P02671|FIBA_HUMAN	DSGEGDFLAEGGGVRGPR		cleaved A-D@N-term; missed R-G@15	1	P02671
sp|P02671|FIBA_HUMAN	ESSSHHPGIAEFPSR			1	P02671
sp|P02671|FIBA_HUMAN	ESSSHHPGIAEFPSRG		cleaved G-K@C-term; missed R-G@15	1	P02671
sp|P02671|FIBA_HUMAN	EVDLKDYEDQQK		missed K-D@5	1	P02671
sp|P02671|FIBA_HUMAN	EVDLKDYEDQQKQLEQVIAK		missed K-D@5; missed K-Q@12	1	P02671
sp|P02671|FIBA_HUMAN	EVDLKDYEDQQKQLEQVIAKDLLPSR		missed K-D@5; missed K-Q@12; missed K-D@20	1	P02671
sp|P02671|FIBA_HUMAN	EVDLKDYEDQQKQLEQVIAKDLLPSRDR		missed K-D@5; missed K-Q@12; missed K-D@20; missed R-D@26	1	P02671
sp|P02671|FIBA_HUMAN	EVTKEVVTSEDGSDCPEAMDLGTLSGIGTLDGFR	Acetyl(S)@13; Carbamidomethyl(C)@15; Oxidation(M)@19	missed K-E@4	1	P02671
sp|P02671|FIBA_HUMAN	EVVTSEDGSDCPEAMDLGTLSGIGTLDGFR	Carbamidomethyl(C)@11		1	P02671
sp|P02671|FIBA_HUMAN	EYHTEKLVTSKGDKELR		missed K-L@6; missed K-G@11; missed K-E@14	1	P02671
sp|P02671|FIBA_HUMAN	GGSTSYGTGSETESPRNPSSAGSWNSGSSGPGSTGNR		missed R-N@16	1	P02671
sp|P02671|FIBA_HUMAN	GLIDEVNQDFTNR			1	P02671
sp|P02671|FIBA_HUMAN	GSESGIFTNTK			1	P02671
sp|P02671|FIBA_HUMAN	GSESGIFTNTKESSSHHPGIAEFPSR		missed K-E@11	1	P02671
sp|P02671|FIBA_HUMAN	GSESGIFTNTKESSSHHPGIAEFPSRGK		missed K-E@11; missed R-G@26	1	P02671
sp|P02671|FIBA_HUMAN	HPDEAAFFDTASTGK			1	P02671
sp|P02671|FIBA_HUMAN	HRHPDEAAFFDTASTGK		missed R-H@2	1	P02671
sp|P02671|FIBA_HUMAN	LVTSKGDKELR		missed K-G@5; missed K-E@8	1	P02671
sp|P02671|FIBA_HUMAN	MELERPGGNEITR			1	P02671
sp|P02671|FIBA_HUMAN	MKPVPDLVPGNFK			1	P02671
sp|P02671|FIBA_HUMAN	MKPVPDLVPGNFKSQLQK	Deamidated(N)@11	missed K-S@13	1	P02671
sp|P02671|FIBA_HUMAN	MKPVPDLVPGNFKSQLQKVPPEWK		missed K-S@13; missed K-V@18	1	P02671
sp|P02671|FIBA_HUMAN	NNKDSHSLTTNIMEILR		missed K-D@3	1	P02671
sp|P02671|FIBA_HUMAN	NSLFEYQK			1	P02671
sp|P02671|FIBA_HUMAN	PGSPRPGSTGTWNPGSSER		cleaved N-P@N-term	1	P02671
sp|P02671|FIBA_HUMAN	QFTSSTSYNRGDSTFESK	Gln->pyro-Glu@N-term	missed R-G@10	1	P02671
sp|P02671|FIBA_HUMAN	QFTSSTSYNRGDSTFESKS	Gln->pyro-Glu@N-term	cleaved S-Y@C-term; missed R-G@10; missed K-S@18	1	P02671
sp|P02671|FIBA_HUMAN	QHLPLIK	Gln->pyro-Glu@N-term		1	P02671
sp|P02671|FIBA_HUMAN	QLEQVIAK	Gln->pyro-Glu@N-term		1	P02671
sp|P02671|FIBA_HUMAN	QLEQVIAKDLLPSRDR	Gln->pyro-Glu@N-term	missed K-D@8; missed R-D@14	1	P02671
sp|P02671|FIBA_HUMAN	SGEGDFLAEGGGVRGPR		cleaved D-S@N-term; missed R-G@14	1	P02671
sp|P02671|FIBA_HUMAN	SQLQKVPPEWK		missed K-V@5	1	P02671
sp|P02671|FIBA_HUMAN	SQLQKVPPEWKALTDMPQMR		missed K-V@5; missed K-A@11	1	P02671
sp|P02671|FIBA_HUMAN	SYKMADEAGSEADHEGTHSTK		missed K-M@3	1	P02671
sp|P02671|FIBA_HUMAN	TVIGPDGHKEVTK		missed K-E@9	1	P02671
sp|P02671|FIBA_HUMAN	TVIGPDGHKEVTKEVVTSEDGSDCPEAMDLGTLSGIGTLDGFR	Carbamidomethyl(C)@24; Carbamidomethyl(E)@26	missed K-E@9; missed K-E@13	1	P02671
sp|P02671|FIBA_HUMAN	GLIDEVNQDFTNRINK		missed R-I@13	1	P02671
sp|P02671|FIBA_HUMAN	DLLPSR			10	P02671, O75526, Q9P219, Q9NSY0, O60884, Q08648, P78560, Q5VT97, Q9Y2U2, Q08188
sp|P02671|FIBA_HUMAN	GDFSSANNRDNTYNRVSEDLR		missed R-D@9; missed R-V@15	1	P02671
sp|P02671|FIBA_HUMAN	VPPEWK			1	P02671
sp|P02671|FIBA_HUMAN	MKGLIDEVNQDFTNR	Oxidation(M)@1	missed K-G@2	1	P02671
sp|P02671|FIBA_HUMAN	GSAGHWTSESSVSGSTGQWHSESGSFRPDSPGSGNARPNNPDWGTFEEVSGNVSPGTRR	Deamidated(N)@40	missed R-R@58	1	P02671
sp|P02671|FIBA_HUMAN	QFTSSTSYNR	Gln->pyro-Glu@N-term		1	P02671
sp|P02671|FIBA_HUMAN	MKGLIDEVNQDFTNRINK		missed K-G@2; missed R-I@15	1	P02671
sp|P02671|FIBA_HUMAN	MKPVPDLVPGNFKSQ		cleaved Q-L@C-term; missed K-S@13	1	P02671
sp|P02671|FIBA_HUMAN	VPDLVPGNFK		cleaved P-V@N-term	1	P02671
sp|P02671|FIBA_HUMAN	MKPVPDLVPGNF		cleaved F-K@C-term	1	P02671
sp|P02671|FIBA_HUMAN	TVIGPDGHKEVTKEVVTSEDGSDCPEAMDLGTLSGIGTLDGFRHR	Carbamidomethyl(C)@24	missed K-E@9; missed K-E@13; missed R-H@43	1	P02671
sp|P02671|FIBA_HUMAN	ESSSHHPGIAEFPSRGK		missed R-G@15	1	P02671
sp|P02671|FIBA_HUMAN	ESSSHHPGIAEF	Glu->pyro-Glu@N-term	cleaved F-P@C-term	1	P02671
sp|P02671|FIBA_HUMAN	GEGDFLAEGGGVRGPR		cleaved S-G@N-term; missed R-G@13	1	P02671
sp|P02671|FIBA_HUMAN	GSSGTGG		cleaved P-G@N-term; cleaved G-T@C-term	2	P02671, Q5U651
sp|P02760|AMBP_HUMAN	AFIQLWAFDAVK			1	P02760
sp|P02760|AMBP_HUMAN	AFIQLWAFDAVKGK		missed K-G@12	1	P02760
sp|P02760|AMBP_HUMAN	CVLFPYGGCQGNGNK	Carbamidomethyl(C)@1; Carbamidomethyl(C)@9; Ammonia-loss(N)@12		1	P02760
sp|P02760|AMBP_HUMAN	CVLFPYGGCQGNGNKFYSEK	Carbamidomethyl(C)@1; Carbamidomethyl(C)@9	missed K-F@15	1	P02760
sp|P02760|AMBP_HUMAN	CVLFPYGGCQGNGNKFYSEKECR	Carbamidomethyl(C)@1; Carbamidomethyl(C)@9; Deamidated(N)@14; Carbamidomethyl(C)@22	missed K-F@15; missed K-E@20	1	P02760
sp|P02760|AMBP_HUMAN	ECREYCGVPGDGDEELLR	Carbamidomethyl(C)@2; Carbamidomethyl(C)@6	missed R-E@3	1	P02760
sp|P02760|AMBP_HUMAN	ECREYCGVPGDGDEELLRFSN	Carbamidomethyl(C)@2; Carbamidomethyl(C)@6	missed R-E@3; missed R-F@18	1	P02760
sp|P02760|AMBP_HUMAN	EDSCQLGYSAGPCMGMTSR	Carbamidomethyl(C)@4; Carbamidomethyl(C)@13		1	P02760
sp|P02760|AMBP_HUMAN	ETLLQDFR			1	P02760
sp|P02760|AMBP_HUMAN	EYCGVPGDGDEELLR	Carbamidomethyl(C)@3		1	P02760
sp|P02760|AMBP_HUMAN	EYCGVPGDGDEELLRFS	Carbamidomethyl(C)@3	cleaved S-N@C-term; missed R-F@15	1	P02760
sp|P02760|AMBP_HUMAN	EYCGVPGDGDEELLRFSN	Carbamidomethyl(C)@3	missed R-F@15	1	P02760
sp|P02760|AMBP_HUMAN	FYSEKECREYCGVPGDGDEELLR	Carbamidomethyl(C)@7; Carbamidomethyl(C)@11	missed K-E@5; missed R-E@8	1	P02760
sp|P02760|AMBP_HUMAN	GECVPGEQEPEPILIPR	Carbamidomethyl(C)@3		1	P02760
sp|P02760|AMBP_HUMAN	GECVPGEQEPEPILIPRV	Carbamidomethyl(C)@3	cleaved V-R@C-term; missed R-V@17	1	P02760
sp|P02760|AMBP_HUMAN	GKCVLFPYGGCQGNGNK	Carbamidomethyl(C)@3; Carbamidomethyl(C)@11	missed K-C@2	1	P02760
sp|P02760|AMBP_HUMAN	GKCVLFPYGGCQGNGNKFYSEK	Carbamidomethyl(C)@3; Carbamidomethyl(C)@11	missed K-C@2; missed K-F@17	1	P02760
sp|P02760|AMBP_HUMAN	GKCVLFPYGGCQGNGNKFYSEKECR	Carbamidomethyl(C)@3; Carbamidomethyl(C)@11; Deamidated(N)@16; Carbamidomethyl(C)@24	missed K-C@2; missed K-F@17; missed K-E@22	1	P02760
sp|P02760|AMBP_HUMAN	GKCVLFPYGGCQGNGNKFYSEKECREYCGVPGDGDEELLR	Carbamidomethyl(C)@3; Carbamidomethyl(C)@11; Carbamidomethyl(C)@24; Carbamidomethyl(C)@28	missed K-C@2; missed K-F@17; missed K-E@22; missed R-E@25	1	P02760
sp|P02760|AMBP_HUMAN	GVCEETSGAYEKTDTDGK	Carbamidomethyl(C)@3	missed K-T@12	1	P02760
sp|P02760|AMBP_HUMAN	GVCEETSGAYEKTDTDGKFLYHK	Carbamidomethyl(C)@3	missed K-T@12; missed K-F@18	1	P02760
sp|P02760|AMBP_HUMAN	IQLWAFDAVK		cleaved F-I@N-term	1	P02760
sp|P02760|AMBP_HUMAN	KEDSCQLGYSAGP	Carbamidomethyl(C)@5	cleaved P-C@C-term; missed K-E@1	1	P02760
sp|P02760|AMBP_HUMAN	KEDSCQLGYSAGPCMGMTSR	Carbamidomethyl(C)@5; Carbamidomethyl(C)@14	missed K-E@1	1	P02760
sp|P02760|AMBP_HUMAN	KGVCEETSGAYEKTDTDGK	Carbamidomethyl(C)@4	missed K-G@1; missed K-T@13	1	P02760
sp|P02760|AMBP_HUMAN	KGVCEETSGAYEKTDTDGKFLYHK	Carbamidomethyl(C)@4	missed K-G@1; missed K-T@13; missed K-F@19	1	P02760
sp|P02760|AMBP_HUMAN	LYGRAPQLR		missed R-A@4	1	P02760
sp|P02760|AMBP_HUMAN	PEDSIFTMADRGECVPGEQEPEPILIPR	Carbamidomethyl(C)@14	cleaved I-P@N-term; missed R-G@11	1	P02760
sp|P02760|AMBP_HUMAN	QLRETLLQDFR		cleaved P-Q@N-term; missed R-E@3	1	P02760
sp|P02760|AMBP_HUMAN	SAGPCMGMTSR	Carbamidomethyl(C)@5	cleaved Y-S@N-term	1	P02760
sp|P02760|AMBP_HUMAN	TVAACNLPIVR	Carbamidomethyl(C)@5		1	P02760
sp|P02760|AMBP_HUMAN	TVAACNLPIVRGP	Carbamidomethyl(C)@5	cleaved P-C@C-term; missed R-G@11	1	P02760
sp|P02760|AMBP_HUMAN	TVAACNLPIVRGPCR	Carbamidomethyl(C)@5; Carbamidomethyl(C)@14	missed R-G@11	1	P02760
sp|P02760|AMBP_HUMAN	VVAQGVGIPEDSIFTMADR			1	P02760
sp|P02760|AMBP_HUMAN	VVAQGVGIPEDSIFTMADRGECVPGEQEPEPILIPR	Carbamidomethyl(C)@22	missed R-G@19	1	P02760
sp|P02760|AMBP_HUMAN	VVAQGVGIPEDSIFTMADRGECVPGEQEPEPILIPRV	Oxidation(M)@16; Carbamidomethyl(C)@22	cleaved V-R@C-term; missed R-G@19; missed R-V@36	1	P02760
sp|P02760|AMBP_HUMAN	WRKGVCEETSGAYEKTDTDGK	Carbamidomethyl(C)@6	missed R-K@2; missed K-G@3; missed K-T@15	1	P02760
sp|P02760|AMBP_HUMAN	FIQLWAFDAVK		cleaved A-F@N-term	1	P02760
sp|P02760|AMBP_HUMAN	NLPIVRGPCRAFIQLWAFDAVKGKCVLFPYGGCQGNGNK	Carbamidomethyl(C)@9; Carbamidomethyl(C)@25; Carbamidomethyl(C)@33	cleaved C-N@N-term; missed R-G@6; missed R-A@10; missed K-G@22; missed K-C@24	1	P02760
sp|P02760|AMBP_HUMAN	QLWAFDAVK	Gln->pyro-Glu@N-term	cleaved I-Q@N-term	1	P02760
sp|P02760|AMBP_HUMAN	TVAACNLPIVRGPC	Carbamidomethyl(C)@5; Carbamidomethyl(C)@14	cleaved C-R@C-term; missed R-G@11	1	P02760
sp|P02760|AMBP_HUMAN	APQLRETLLQDFR		missed R-E@5	1	P02760
sp|P02760|AMBP_HUMAN	ECLQTCR	Carbamidomethyl(C)@2; Carbamidomethyl(C)@6		1	P02760
sp|P02760|AMBP_HUMAN	NLPIVRGPCRAFIQLWAFDAVKGKCVLFPYGGCQGNGNKFYSEKECR	Carbamidomethyl(C)@9; Carbamidomethyl(C)@25; Carbamidomethyl(C)@33; Carbamidomethyl(C)@46	cleaved C-N@N-term; missed R-G@6; missed R-A@10; missed K-G@22; missed K-C@24; missed K-F@39; missed K-E@44	1	P02760
sp|P02760|AMBP_HUMAN	CVLFPY	Carbamidomethyl(C)@1	cleaved Y-G@C-term	1	P02760
sp|P02760|AMBP_HUMAN	CVLFPYGGCQGNGNKFYSEKECREYCGVPGDGDEELLR	Carbamidomethyl(C)@1; Carbamidomethyl(C)@9; Carbamidomethyl(C)@22; Carbamidomethyl(C)@26	missed K-F@15; missed K-E@20; missed R-E@23	1	P02760
sp|P02760|AMBP_HUMAN	VTEKECLQTCRTVAACNLPIVR	Carbamidomethyl(C)@6; Carbamidomethyl(C)@10; Carbamidomethyl(C)@16	cleaved F-V@N-term; missed K-E@4; missed R-T@11	1	P02760
sp|P02760|AMBP_HUMAN	LWAFDAVK		cleaved Q-L@N-term	1	P02760
sp|P02760|AMBP_HUMAN	RVVAQGVGIPEDSIFTMADRGECVPGEQEPEPILIPR	Carbamidomethyl(C)@23	cleaved F-R@N-term; missed R-V@1; missed R-G@20	1	P02760
sp|P02760|AMBP_HUMAN	FYSEKECR	Carbamidomethyl(C)@7	missed K-E@5	1	P02760
sp|P02760|AMBP_HUMAN	PGDGDEELLR		cleaved V-P@N-term	1	P02760
sp|P02760|AMBP_HUMAN	KECREYCGVPGDGDEELLR	Carbamidomethyl(C)@3; Carbamidomethyl(C)@7	cleaved E-K@N-term; missed K-E@1; missed R-E@4	1	P02760
sp|P02760|AMBP_HUMAN	AACNLPIVR	Carbamidomethyl(C)@3	cleaved V-A@N-term	1	P02760
sp|P02760|AMBP_HUMAN	YCGVPGDGDEELLR	Lys-add@N-term; Carbamidomethyl(C)@2	cleaved E-Y@N-term	1	P02760
sp|P02760|AMBP_HUMAN	VAACNLPIVR	Carbamidomethyl(C)@4	cleaved T-V@N-term	1	P02760
sp|P02760|AMBP_HUMAN	TDTDGKFLYHK		missed K-F@6	1	P02760
sp|P02760|AMBP_HUMAN	GNGNKFYSEKECREYCGVPGDGDEELLR	Carbamidomethyl@N-term; Carbamidomethyl(C)@12; Carbamidomethyl(C)@16	cleaved Q-G@N-term; missed K-F@5; missed K-E@10; missed R-E@13	1	P02760
sp|P02760|AMBP_HUMAN	PYGGCQGNGNKFYSEKECREYCGVPGDGDEELLR	Carbamidomethyl(C)@5; Carboxyethyl(K)@16; Carbamidomethyl(C)@18; Carbamidomethyl(C)@22	cleaved F-P@N-term; missed K-F@11; missed K-E@16; missed R-E@19	1	P02760
sp|P02760|AMBP_HUMAN	QLWAFDAVKGKCVLFPYGGCQGNGNK	Dehydrated(D)@6; Carbamidomethyl(C)@12; Carbamidomethyl(C)@20	cleaved I-Q@N-term; missed K-G@9; missed K-C@11	1	P02760
sp|P02760|AMBP_HUMAN	QLWAFDAVKGKCVLFPYGGCQGNGNKFYSEKECREYCGVPGDGDEELLR	Carbamidomethyl(C)@12; Carbamidomethyl(C)@20; Carbamidomethyl(C)@33; Carbamidomethyl(C)@37	cleaved I-Q@N-term; missed K-G@9; missed K-C@11; missed K-F@26; missed K-E@31; missed R-E@34	1	P02760
sp|P10909|CLUS_HUMAN	ASSIIDELFQDR			1	P10909
sp|P10909|CLUS_HUMAN	CREILSVDCSTNNPSQAK	Carbamidomethyl(C)@1; Deamidated(R)@2; Dehydrated(E)@3; Carbamidomethyl(C)@9	missed R-E@2	1	P10909
sp|P10909|CLUS_HUMAN	DQTVSDNELQEMSNQGSK		cleaved G-D@N-term	1	P10909
sp|P10909|CLUS_HUMAN	DQTVSDNELQEMSNQGSKYVNKEIQNAVNGVK		cleaved G-D@N-term; missed K-Y@18; missed K-E@22	1	P10909
sp|P10909|CLUS_HUMAN	EILSVDCSTNNPSQAK	Carbamidomethyl(C)@7		1	P10909
sp|P10909|CLUS_HUMAN	EIQNAVNGVK			1	P10909
sp|P10909|CLUS_HUMAN	ELDESLQVAER			1	P10909
sp|P10909|CLUS_HUMAN	ELDESLQVAERLTR		missed R-L@11	1	P10909
sp|P10909|CLUS_HUMAN	FFTREPQDT		cleaved T-Y@C-term; missed R-E@4	1	P10909
sp|P10909|CLUS_HUMAN	FMETVAEK			1	P10909
sp|P10909|CLUS_HUMAN	FMETVAEKALQEYR		missed K-A@8	1	P10909
sp|P10909|CLUS_HUMAN	FMETVAEKALQEYRK		missed K-A@8; missed R-K@14	1	P10909
sp|P10909|CLUS_HUMAN	FMETVAEKALQEYRKK		missed K-A@8; missed R-K@14; missed K-K@15	1	P10909
sp|P10909|CLUS_HUMAN	GDQTVSDNELQEMSNQGSK		cleaved L-G@N-term	1	P10909
sp|P10909|CLUS_HUMAN	HFFFPK		cleaved P-H@N-term	1	P10909
sp|P10909|CLUS_HUMAN	KTLLSNLEEAK		missed K-T@1	1	P10909
sp|P10909|CLUS_HUMAN	KTLLSNLEEAKK		missed K-T@1; missed K-K@11	1	P10909
sp|P10909|CLUS_HUMAN	LFDSDPITVTVPVEVSR			1	P10909
sp|P10909|CLUS_HUMAN	LFDSDPITVTVPVEVSRKNPK		missed R-K@17; missed K-N@18	1	P10909
sp|P10909|CLUS_HUMAN	LRRELDESLQVAER		missed R-R@2; missed R-E@3	1	P10909
sp|P10909|CLUS_HUMAN	MKDQCDKCREILSVDCSTNNPSQAK	Carbamidomethyl(C)@5; Carbamidomethyl(C)@8; Carbamidomethyl(C)@16	missed K-D@2; missed K-C@7; missed R-E@9	1	P10909
sp|P10909|CLUS_HUMAN	QDTYHYLPFSLPHR	Gln->pyro-Glu@N-term	cleaved P-Q@N-term	1	P10909
sp|P10909|CLUS_HUMAN	RELDESLQVAER		missed R-E@1	1	P10909
sp|P10909|CLUS_HUMAN	RPHFFFPK			1	P10909
sp|P10909|CLUS_HUMAN	TLIEKTNEER		missed K-T@5	1	P10909
sp|P10909|CLUS_HUMAN	TLIEKTNEERKTLLSNLEEAK		missed K-T@5; missed R-K@10; missed K-T@11	1	P10909
sp|P10909|CLUS_HUMAN	TLIEKTNEERKTLLSNLEEAKK	Deamidated(N)@7	missed K-T@5; missed R-K@10; missed K-T@11; missed K-K@21	1	P10909
sp|P10909|CLUS_HUMAN	TLLSNLEEAK			1	P10909
sp|P10909|CLUS_HUMAN	TLLSNLEEAKK		missed K-K@10	1	P10909
sp|P10909|CLUS_HUMAN	TNEERKTLLSNLEEAK		missed R-K@5; missed K-T@6	1	P10909
sp|P10909|CLUS_HUMAN	TNEERKTLLSNLEEAKK		missed R-K@5; missed K-T@6; missed K-K@16	1	P10909
sp|P10909|CLUS_HUMAN	VTTVASHTSDSDVPSGVTEVVVK			1	P10909
sp|P10909|CLUS_HUMAN	YVNKEIQNAVNGVK		missed K-E@4	1	P10909
sp|P10909|CLUS_HUMAN	YVNKEIQNAVNGVKQIK	Deamidated(N)@11	missed K-E@4; missed K-Q@14	1	P10909
sp|P10909|CLUS_HUMAN	ALQEYR			2	P0CE72, P10909
sp|P10909|CLUS_HUMAN	QIKTLIEKTNEER		missed K-T@3; missed K-T@8	1	P10909
sp|P10909|CLUS_HUMAN	KYNELLK		missed K-Y@1	1	P10909
sp|P10909|CLUS_HUMAN	TLIEKTNEERK		missed K-T@5; missed R-K@10	1	P10909
sp|P10909|CLUS_HUMAN	DQTVSDNELQEMSNQGSKYVNK		cleaved G-D@N-term; missed K-Y@18	1	P10909
sp|P10909|CLUS_HUMAN	PITVTVPVEVSR		cleaved D-P@N-term	1	P10909
sp|P10909|CLUS_HUMAN	YNELLK			6	P61266, Q8TBZ6, Q14690, Q6UWY5, Q9NQ76, P10909
sp|P10909|CLUS_HUMAN	LSNLEEAKK		cleaved L-L@N-term; missed K-K@8	1	P10909
sp|P10909|CLUS_HUMAN	SNLEEAKK		cleaved L-S@N-term; missed K-K@7	1	P10909
sp|P10909|CLUS_HUMAN	EPQDTYHYLPFSLPHR			1	P10909
sp|P10909|CLUS_HUMAN	GDQTVSDNELQEMSNQGSKYVNKEIQNAVNGVK	Deamidated(N)@30	cleaved L-G@N-term; missed K-Y@19; missed K-E@23	1	P10909
sp|P10909|CLUS_HUMAN	DKCREILSVDCSTNNPSQAK	Formyl@N-term; Carbamidomethyl(C)@3; Carbamidomethyl(C)@11	cleaved C-D@N-term; missed K-C@2; missed R-E@4	1	P10909
sp|P10909|CLUS_HUMAN	KNPKFMETVAEK	Oxidation(P)@3; Oxidation(M)@6	missed K-N@1; missed K-F@4	1	P10909
sp|P10909|CLUS_HUMAN	TVCREIRHN	Carbamidomethyl@N-term; Carbamidomethyl(C)@3	cleaved N-S@C-term; missed R-E@4; missed R-H@7	1	P10909
sp|P09871|C1S_HUMAN	AARLPVAPLRK		missed R-L@3; missed R-K@10	1	P09871
sp|P09871|C1S_HUMAN	CKEVKVEKPTADAEAYVFTPNMICAGGEK	Carbamidomethyl(C)@1; Carbamidomethyl(C)@24	missed K-E@2; missed K-V@5	1	P09871
sp|P09871|C1S_HUMAN	CQPVDCGIPESIENGKVEDPESTLFGSVIR	Carbamidomethyl(C)@1; Carbamidomethyl(C)@6	missed K-V@16	1	P09871
sp|P09871|C1S_HUMAN	CVPVCGVPREPFEEK	Carbamidomethyl(C)@1; Carbamidomethyl(C)@5	missed R-E@9	1	P09871
sp|P09871|C1S_HUMAN	CVPVCGVPREPFEEKQR	Carbamidomethyl(C)@1; Carbamidomethyl(C)@5	missed R-E@9; missed K-Q@15	1	P09871
sp|P09871|C1S_HUMAN	DVVQITCLDGFEVVEGR	Carbamidomethyl(C)@7		1	P09871
sp|P09871|C1S_HUMAN	EDTPNSVWEPAK			1	P09871
sp|P09871|C1S_HUMAN	EDTPNSVWEPAKAK		missed K-A@12	1	P09871
sp|P09871|C1S_HUMAN	EPTMYGEILSPNYPQAYPSEVEK		cleaved A-E@N-term	1	P09871
sp|P09871|C1S_HUMAN	EVKVEKPTADAEAYVFTPNMICAGGEK	Carbamidomethyl(C)@22	missed K-V@3	1	P09871
sp|P09871|C1S_HUMAN	EVKVEKPTADAEAYVFTPNMICAGGEKGMDSCKGDSGGAFAVQDPNDKTK	Deamidated(N)@19; Carbamidomethyl(C)@22; Carbamidomethyl(C)@32	missed K-V@3; missed K-G@27; missed K-G@33; missed K-T@48	1	P09871
sp|P09871|C1S_HUMAN	FDNDIALVR		cleaved N-F@N-term	1	P09871
sp|P09871|C1S_HUMAN	GDSGGAFAVQDPNDKTK		missed K-T@15	1	P09871
sp|P09871|C1S_HUMAN	GMDSCKGDSGGAFAVQDPNDK	Carbamidomethyl(C)@5	missed K-G@6	1	P09871
sp|P09871|C1S_HUMAN	GMDSCKGDSGGAFAVQDPNDKTK	Carbamidomethyl(C)@5	missed K-G@6; missed K-T@21	1	P09871
sp|P09871|C1S_HUMAN	LKCQPVDCGIPESIENGKVEDPESTLFGSVIR	Carbamidomethyl(C)@3; Carbamidomethyl(C)@8	missed K-C@2; missed K-V@18	1	P09871
sp|P09871|C1S_HUMAN	LLEVPEGR			2	Q5TEJ8, P09871
sp|P09871|C1S_HUMAN	MLTPEHVFIHPGWK			1	P09871
sp|P09871|C1S_HUMAN	NYVDWIMK	Dethiomethyl(M)@7		1	P09871
sp|P09871|C1S_HUMAN	PESTLFGSVIR		cleaved D-P@N-term	1	P09871
sp|P09871|C1S_HUMAN	QCGTYGLYTR	Gln->pyro-Glu@N-term; Carbamidomethyl(C)@2	cleaved P-Q@N-term	1	P09871
sp|P09871|C1S_HUMAN	TMQENSTPRED		missed R-E@9	1	P09871
sp|P09871|C1S_HUMAN	TMYGEILSPNYPQAYPSEVEK	Deamidated(N)@10	cleaved P-T@N-term	1	P09871
sp|P09871|C1S_HUMAN	TNFDNDIALVR			1	P09871
sp|P09871|C1S_HUMAN	VEDPESTLFGSVIR			1	P09871
sp|P09871|C1S_HUMAN	VEKPTADAEAYVFTPN		cleaved N-M@C-term	1	P09871
sp|P09871|C1S_HUMAN	VEKPTADAEAYVFTPNMICAGGEK	Carbamidomethyl(C)@19		1	P09871
sp|P09871|C1S_HUMAN	VEKPTADAEAYVFTPNMICAGGEKGMDSCKGDSGGAFAVQDPNDKTK	Carbamidomethyl(C)@19; Carbamidomethyl(C)@29	missed K-G@24; missed K-G@30; missed K-T@45	1	P09871
sp|P09871|C1S_HUMAN	VGATSFYSTCQSNGK	Carbamidomethyl(C)@10; Deamidated(N)@13		1	P09871
sp|P09871|C1S_HUMAN	VGATSFYSTCQSNGKWSNSK	Carbamidomethyl(C)@10	missed K-W@15	1	P09871
sp|P09871|C1S_HUMAN	VKNYVDWIMK		missed K-N@2	1	P09871
sp|P09871|C1S_HUMAN	YHGDPMPCPK	Carbamidomethyl(C)@8		1	P09871
sp|P09871|C1S_HUMAN	YHGDPMPCPKEDTPNSVWEPAK	Carbamidomethyl(C)@8	missed K-E@10	1	P09871
sp|P09871|C1S_HUMAN	YHGDPMPCPKEDTPNSVWEPAKAK	Carbamidomethyl(C)@8	missed K-E@10; missed K-A@22	1	P09871
sp|P09871|C1S_HUMAN	LLEVPEGRTNFDNDIALVR		missed R-T@8	1	P09871
sp|P09871|C1S_HUMAN	CVPVCGVPR	Carbamidomethyl(C)@1; Carbamidomethyl(C)@5		1	P09871
sp|P09871|C1S_HUMAN	SSNNPHSPIVEEFQVPYNK			1	P09871
sp|P09871|C1S_HUMAN	EPTMYVGSTSVQTSR			1	P09871
sp|P09871|C1S_HUMAN	IIGGSDADIK			1	P09871
sp|P09871|C1S_HUMAN	LQVIFK			6	Q14957, O95789, Q2TB18, Q5VYJ5, P09871, Q92766
sp|P09871|C1S_HUMAN	QRIIGGSDADIK	Gln->pyro-Glu@N-term	missed R-I@2	1	P09871
sp|P09871|C1S_HUMAN	VEKPTADAEAYVFTPNMICAGGEKG	Carbamidomethyl(C)@19	cleaved G-M@C-term; missed K-G@24	1	P09871
sp|P09871|C1S_HUMAN	LRYHGDPMPCPKEDTPNSVWEPAK	Carbamidomethyl(C)@10	missed R-Y@2; missed K-E@12	1	P09871
sp|P09871|C1S_HUMAN	LPVAPLRK		missed R-K@7	1	P09871
sp|P09871|C1S_HUMAN	LKDPVK		missed K-D@2	7	Q9ULC5, Q86UF4, Q96JM7, P33121, P09871, O75165, Q96L93
sp|P09871|C1S_HUMAN	LRYHGDPMPCPK	Carbamidomethyl(C)@10	missed R-Y@2	1	P09871
sp|P09871|C1S_HUMAN	SNALDIIFQTDLTGQKK		missed K-K@16	1	P09871
sp|P09871|C1S_HUMAN	TYGLYTRVKNYVDWIMK		cleaved G-T@N-term; missed R-V@7; missed K-N@9	1	P09871
sp|P09871|C1S_HUMAN	FIHPGWKLLEVPEGRTNFDNDIALVR	Dioxidation(W)@6	cleaved V-F@N-term; missed K-L@7; missed R-T@15	1	P09871
sp|P09871|C1S_HUMAN	AEAYVFTPNMICAGGEK	Carbamidomethyl(C)@12	cleaved D-A@N-term	1	P09871
sp|P09871|C1S_HUMAN	FRDVVQITCLDGFEVVEGRVGATSFYSTCQSNGKWSNSK	Carbamidomethyl(C)@9; Carbamidomethyl(C)@29	cleaved V-F@N-term; missed R-D@2; missed R-V@19; missed K-W@34	1	P09871
sp|P09871|C1S_HUMAN	VEKPTADAEAYVFTPNMICAGGEKGMDSCK	Carbamidomethyl(C)@19; Carbamidomethyl(C)@29	missed K-G@24	1	P09871
sp|P09871|C1S_HUMAN	GFEVVEGRVGATSFYSTCQSNGKWSNSKLKCQPVDCGIPESIENGKVEDPESTLFGSVIR	Carbamidomethyl(C)@18; Carbamidomethyl(C)@31; Carbamidomethyl(C)@36	cleaved D-G@N-term; missed R-V@8; missed K-W@23; missed K-L@28; missed K-C@30; missed K-V@46	1	P09871
sp|P09871|C1S_HUMAN	GRTNFDNDIALVR	Arg->GluSA(R)@2	cleaved E-G@N-term; missed R-T@2	1	P09871
sp|P09871|C1S_HUMAN	PEGRTNFDNDIALVR	Arg->Orn(R)@4	cleaved V-P@N-term; missed R-T@4	1	P09871
sp|P09871|C1S_HUMAN	WVLTAAH		cleaved Y-W@N-term; cleaved H-V@C-term	51	P57727, P49862, P08519, Q6ZR98, O00187, Q86WS5, Q9NRS4, P00747, P00748, P20231, Q9GZN4, Q15661, O43240, P03952, P10323, P12544, A6NIE9, O60259, Q9P0G3, P00734, Q7RTZ1, P06870, P07288, P05981, P0CW18, Q9UKR3, Q9UKR0, E7EML9, P08217, P51124, nP08218, Q9BQR3, P56730, E5RG02, Q8NF86, Q9BYE2, P06681, P09871, Q8IU80, Q92876, P20151, P48740, Q8IYP2, Q9UNI1, Q9NRR2, Q2L4Q9, Q9BZJ3, P04070, A0A1B0, P49863…
sp|P02751|FINC_HUMAN	CHEGGQSYKIGDTWR	Carbamidomethyl(C)@1; Dehydrated(E)@3; Deamidated(Q)@6	missed K-I@9	1	P02751
sp|P02751|FINC_HUMAN	DSMIWDCTCIGAGR	Carbamidomethyl(C)@7; Carbamidomethyl(C)@9		1	P02751
sp|P02751|FINC_HUMAN	ESGFKLLCQCLGFGSGHFR	Carbamidomethyl(C)@8; Carbamidomethyl(C)@10	cleaved S-E@N-term; missed K-L@5	1	P02751
sp|P02751|FINC_HUMAN	EYLGAICSCTCFGGQR	Carbamidomethyl(C)@7; Carbamidomethyl(C)@9; Carbamidomethyl(C)@11		1	P02751
sp|P02751|FINC_HUMAN	FGQGRGRWK		cleaved C-F@N-term; missed R-G@5; missed R-W@7	1	P02751
sp|P02751|FINC_HUMAN	GEWTCIAYSQLR	Carbamidomethyl(C)@5		1	P02751
sp|P02751|FINC_HUMAN	GFNCESKPEAEETCFDK	Carbamidomethyl(C)@4; Carbamidomethyl(C)@14		1	P02751
sp|P02751|FINC_HUMAN	GFNCESKPEAEETCFDKYTGNTYR	Carbamidomethyl(C)@4; Carbamidomethyl(C)@14	missed K-Y@17	1	P02751
sp|P02751|FINC_HUMAN	GGEPSPEGTTGQSYNQYSQR		cleaved P-G@N-term	1	P02751
sp|P02751|FINC_HUMAN	GNLLQCICTGNGR	Carbamidomethyl(C)@6; Carbamidomethyl(C)@8		1	P02751
sp|P02751|FINC_HUMAN	GNLLQCICTGNGRGEWK	Carbamidomethyl(C)@6; Carbamidomethyl(C)@8	missed R-G@13	1	P02751
sp|P02751|FINC_HUMAN	HTSVQTTSSGSGPFTDVR			1	P02751
sp|P02751|FINC_HUMAN	HYQINQQWER			1	P02751
sp|P02751|FINC_HUMAN	IGDQWDKQHDMGHMMR		missed K-Q@7	1	P02751
sp|P02751|FINC_HUMAN	ISCTIANR	Carbamidomethyl(C)@3		1	P02751
sp|P02751|FINC_HUMAN	IYLYTLNDNAR			1	P02751
sp|P02751|FINC_HUMAN	LLCQCLGFGSGHFR	Carbamidomethyl(C)@3; Carbamidomethyl(C)@5		1	P02751
sp|P02751|FINC_HUMAN	QAQQMVQPQSPVAVSQSKPGCYDNGK	Gln->pyro-Glu@N-term; Carbamidomethyl(C)@21		1	P02751
sp|P02751|FINC_HUMAN	QAQQMVQPQSPVAVSQSKPGCYDNGKHYQINQQWER	Gln->pyro-Glu@N-term; Carbamidomethyl(C)@21	missed K-H@26	1	P02751
sp|P02751|FINC_HUMAN	QDGHLWCSTTSNYEQDQK	Gln->pyro-Glu@N-term; Carbamidomethyl(C)@7		1	P02751
sp|P02751|FINC_HUMAN	QGENGQMMSCTCLGNGKGEFK	Gln->pyro-Glu@N-term; Carbamidomethyl(C)@10; Carbamidomethyl(C)@12	missed K-G@17	1	P02751
sp|P02751|FINC_HUMAN	QMLCTCLGNGVSCQETAVTQTYGGNSNGEPCVLPFTYNGR	Carbamidomethyl(C)@4; Carbamidomethyl(C)@6; Deamidated(N)@9; Carbamidomethyl(C)@13; Deamidated(N)@25; Deamidated(N)@27; Carbamidomethyl(C)@31		1	P02751
sp|P02751|FINC_HUMAN	RPGGEPSPEGTTGQSYNQYSQR			1	P02751
sp|P02751|FINC_HUMAN	SYTITGLQPGTDYK			1	P02751
sp|P02751|FINC_HUMAN	TFYSCTTEGR	Carbamidomethyl(C)@5		1	P02751
sp|P02751|FINC_HUMAN	TKTETITGFQVDAVPANGQTPIQR		missed K-T@2	1	P02751
sp|P02751|FINC_HUMAN	TNTNVNCPIECFMPLDVQA	Carbamidomethyl(C)@7; Carbamidomethyl(C)@11	cleaved A-D@C-term	1	P02751
sp|P02751|FINC_HUMAN	TNTNVNCPIECFMPLDVQADREDSRE	Carbamidomethyl(C)@7; Carbamidomethyl(C)@11	missed R-E@21; missed R-E@25	1	P02751
sp|P02751|FINC_HUMAN	TPFVTHPGYDTGNGIQLPGTSGQQPSVGQQMIFEEHGFRR		missed R-R@39	1	P02751
sp|P02751|FINC_HUMAN	TYLGNALVCTCYGGSR	Carbamidomethyl(C)@9; Carbamidomethyl(C)@11		1	P02751
sp|P02751|FINC_HUMAN	VGDTYERPKDSMIWDCTCIGAGR	Carbamidomethyl(C)@16; Carbamidomethyl(C)@18	missed K-D@9	1	P02751
sp|P02751|FINC_HUMAN	WCGTTQNYDADQK	Carbamidomethyl(C)@2		1	P02751
sp|P02751|FINC_HUMAN	WCHDNGVNYK	Carbamidomethyl(C)@2		1	P02751
sp|P02751|FINC_HUMAN	WLPSSSPVTGYR			1	P02751
sp|P02751|FINC_HUMAN	YSFCTDHTVLVQTR	Carbamidomethyl(C)@4		1	P02751
sp|P02751|FINC_HUMAN	YQCYCYGR	Carbamidomethyl(C)@3; Carbamidomethyl(C)@5		1	P02751
sp|P02751|FINC_HUMAN	GEWTCKPIAEK	Carbamidomethyl(C)@5		1	P02751
sp|P02751|FINC_HUMAN	GLAFTDVDVDSIK			1	P02751
sp|P02751|FINC_HUMAN	IGDTWSK			1	P02751
sp|P02751|FINC_HUMAN	IGDTWR			1	P02751
sp|P02751|FINC_HUMAN	ISWDAPAVTVR		cleaved L-I@N-term	1	P02751
sp|P02751|FINC_HUMAN	TSYRIGDTWSK		missed R-I@4	1	P02751
sp|P02751|FINC_HUMAN	CDNCRRPGGEPSPEGTTGQSYNQYSQR	Carbamidomethyl(C)@1; Carbamidomethyl(C)@4	missed R-R@5	1	P02751
sp|P02751|FINC_HUMAN	TQGNKQMLCTCLGNGVSCQETAVTQTYGGNSNGEPCVLPFTYNGR	Deamidated(N)@4; Carbamidomethyl(C)@9; Carbamidomethyl(C)@11; Carbamidomethyl(C)@18; Carbamidomethyl(C)@36	missed K-Q@5	1	P02751
sp|P02751|FINC_HUMAN	MKWCGTTQNYDADQK	Oxidation(M)@1; Carbamyl(K)@2; Carbamidomethyl(C)@4	cleaved N-M@N-term; missed K-W@2	1	P02751
sp|P02751|FINC_HUMAN	LKTQGNK	Deamidated(Q)@4	cleaved W-L@N-term; missed K-T@2	1	P02751
sp|P02751|FINC_HUMAN	TFYSCTTEGRQDGHLWCSTTSNYEQDQK	Carbamidomethyl(C)@5; Carbamidomethyl(C)@17; Deamidated(N)@22	missed R-Q@10	1	P02751
sp|P02751|FINC_HUMAN	SPPTNLHLEANPDTGVLTVSWER		cleaved L-S@N-term	1	P02751
sp|P02751|FINC_HUMAN	TPFVTHPGYDT		cleaved T-G@C-term	1	P02751
sp|P02751|FINC_HUMAN	GRISCTIANR	Carbamidomethyl(C)@5; Deamidated(N)@9	missed R-I@2	1	P02751
sp|P02751|FINC_HUMAN	KYEKPGSPPR		cleaved I-K@N-term; missed K-Y@1	1	P02751
sp|P02751|FINC_HUMAN	IQQETTGTPRSDTVPSPRDLQF	Deamidated(Q)@2	cleaved V-I@N-term; cleaved F-V@C-term; missed R-S@10; missed R-D@18	1	P02751
sp|P02751|FINC_HUMAN	NFLVR	Carbamidomethyl@N-term	cleaved T-N@N-term	NA, length less than 6
sp|P19823|ITIH2_HUMAN	AHVSFKPTVAQQR			1	P19823
sp|P19823|ITIH2_HUMAN	ALYAQAR			1	P19823
sp|P19823|ITIH2_HUMAN	DAPPQDPSCCSGALYYGSK	Carbamidomethyl(C)@9; Carbamidomethyl(C)@10	cleaved A-D@N-term	1	P19823
sp|P19823|ITIH2_HUMAN	ETAVDGELVVLYDVK			1	P19823
sp|P19823|ITIH2_HUMAN	ETAVDGELVVLYDVKREEK		missed K-R@15; missed R-E@16	1	P19823
sp|P19823|ITIH2_HUMAN	FLHVPDTFEGHFDGVPVISK			1	P19823
sp|P19823|ITIH2_HUMAN	FLHVPDTFEGHFDGVPVISKGQQK		missed K-G@20	1	P19823
sp|P19823|ITIH2_HUMAN	FYNQVSTPLLR			1	P19823
sp|P19823|ITIH2_HUMAN	GNQDTSSQLKKFYNQVSTPLLR		cleaved Y-G@N-term; missed K-K@10; missed K-F@11	1	P19823
sp|P19823|ITIH2_HUMAN	HLEVDVWVIEPQGLR			1	P19823
sp|P19823|ITIH2_HUMAN	IQPSGGTNINEALLR			1	P19823
sp|P19823|ITIH2_HUMAN	IYGNQDTSSQLK			1	P19823
sp|P19823|ITIH2_HUMAN	IYGNQDTSSQLKK	Carbamidomethyl@N-term	missed K-K@12	1	P19823
sp|P19823|ITIH2_HUMAN	IYLQPGR	Carbamidomethyl@N-term		1	P19823
sp|P19823|ITIH2_HUMAN	KFYNQVSTPLLR		missed K-F@1	1	P19823
sp|P19823|ITIH2_HUMAN	LSNENHGIAQR			1	P19823
sp|P19823|ITIH2_HUMAN	MATTMIQSK			1	P19823
sp|P19823|ITIH2_HUMAN	MLADAPPQDPSCCSGALYYGSK	Carbamidomethyl(C)@12; Carbamidomethyl(C)@13		1	P19823
sp|P19823|ITIH2_HUMAN	NDLISATKTQVADAK		missed K-T@8	1	P19823
sp|P19823|ITIH2_HUMAN	NDLISATKTQVADAKR		missed K-T@8; missed K-R@15	1	P19823
sp|P19823|ITIH2_HUMAN	PSCCSGALYYGSK	Carbamidomethyl(C)@3; Carbamidomethyl(C)@4	cleaved D-P@N-term	1	P19823
sp|P19823|ITIH2_HUMAN	SILQMSLDHHIVTPLTSLVIENEAGDER	Carbamidomethyl(D)@8		1	P19823
sp|P19823|ITIH2_HUMAN	SLAPTAAAK			1	P19823
sp|P19823|ITIH2_HUMAN	SSALDMENFR			1	P19823
sp|P19823|ITIH2_HUMAN	SSALDMENFRTEVNVLPGAK		missed R-T@10	1	P19823
sp|P19823|ITIH2_HUMAN	TEVNVLPGAK			1	P19823
sp|P19823|ITIH2_HUMAN	TWRNDLISATK		missed R-N@3	1	P19823
sp|P19823|ITIH2_HUMAN	TWRNDLISATKTQVADAK		missed R-N@3; missed K-T@11	1	P19823
sp|P19823|ITIH2_HUMAN	TWRNDLISATKTQVADAKR		missed R-N@3; missed K-T@11; missed K-R@18	1	P19823
sp|P19823|ITIH2_HUMAN	VQFELHYQEVK			1	P19823
sp|P19823|ITIH2_HUMAN	VVNNSPQPQNVVFDVQIPK			1	P19823
sp|P19823|ITIH2_HUMAN	YIEKIQPSGGTNINEALLR		missed K-I@4	1	P19823
sp|P19823|ITIH2_HUMAN	PQDPSCCSGALYYGSK	Carbamidomethyl(C)@6; Carbamidomethyl(C)@7	cleaved P-P@N-term	1	P19823
sp|P19823|ITIH2_HUMAN	IYLQPGRLAK		missed R-L@7	1	P19823
sp|P19823|ITIH2_HUMAN	GQQKAHVSFKPTVAQQR		missed K-A@4	1	P19823
sp|P19823|ITIH2_HUMAN	SLPGESEEMMEEVDQVTLYSYK	Phospho(S)@6		1	P19823
sp|P19823|ITIH2_HUMAN	YNQVSTPLLR		cleaved F-Y@N-term	1	P19823
sp|P19823|ITIH2_HUMAN	NDLISATK			2	P19823, P12270
sp|P19823|ITIH2_HUMAN	TILDDLR			2	P19823, P0C091
sp|P19823|ITIH2_HUMAN	ATTMIQSK	Deamidated(Q)@6	cleaved M-A@N-term	1	P19823
sp|P19823|ITIH2_HUMAN	ISATKTQVADAK		cleaved L-I@N-term; missed K-T@5	1	P19823
sp|P19823|ITIH2_HUMAN	ICPNCRETAVDGELVVLYDVKREEK	Carbamidomethyl(C)@2; Oxidation(P)@3; Carbamidomethyl(C)@5; Arg->Orn(R)@6	missed R-E@6; missed K-R@21; missed R-E@22	1	P19823
sp|P19823|ITIH2_HUMAN	QLKKFYNQVSTPLLR	Gln->pyro-Glu@N-term; Deamidated(N)@7	cleaved S-Q@N-term; missed K-K@3; missed K-F@4	1	P19823
sp|P01031|CO5_HUMAN	AARISLGPRCIKAFTECCVVASQLR	Lys-add@N-term; Carbamidomethyl(C)@10; Carbamidomethyl(C)@17; Carbamidomethyl(C)@18	missed R-I@3; missed R-C@9; missed K-A@12	1	P01031
sp|P01031|CO5_HUMAN	AFDICPLVK	Carbamidomethyl(C)@5		1	P01031
sp|P01031|CO5_HUMAN	AFTECCVVASQLR	Carbamidomethyl(C)@5; Carbamidomethyl(C)@6		1	P01031
sp|P01031|CO5_HUMAN	CCYDGACVNNDETCEQR	Carbamidomethyl(C)@1; Carbamidomethyl(C)@2; Carbamidomethyl(C)@7; Deamidated(N)@9; Carbamidomethyl(C)@14		1	P01031
sp|P01031|CO5_HUMAN	EALVKGNPPIYR		missed K-G@5	1	P01031
sp|P01031|CO5_HUMAN	EGMLSIMSYR			1	P01031
sp|P01031|CO5_HUMAN	EKFSDASYQSINIPVTQNMVPSSR		missed K-F@2	1	P01031
sp|P01031|CO5_HUMAN	ESYSGVTLDPR			1	P01031
sp|P01031|CO5_HUMAN	FSDASYQSINIPVTQNMVPSSR			1	P01031
[truncated: 3,953 more rows]

## Sheet: HpH
Accessions	Sequence	Modifications	Cleavages	Uniqueness	Matching PMIDs
sp|P08603|CFAH_HUMAN	AGEQVTYTCATYYK	Carbamidomethyl(C)@9		1	P08603
sp|P08603|CFAH_HUMAN	AQTTVTCMENGWSPTPR	Carbamidomethyl(C)@7; Oxidation(M)@8		1	P08603
sp|P08603|CFAH_HUMAN	AVYTCNEGYQLLGEINYR	Carbamidomethyl(C)@5		1	P08603
sp|P08603|CFAH_HUMAN	CFEGFGIDGPAIAK	Carbamidomethyl(C)@1		1	P08603
sp|P08603|CFAH_HUMAN	CGHPGDTPFGTFTLTGGNVFEYGVK	Carbamidomethyl(C)@1	cleaved P-C@N-term	1	P08603
sp|P08603|CFAH_HUMAN	CKSSNLIILEEHLK	Carbamidomethyl(C)@1	missed K-S@2	1	P08603
sp|P08603|CFAH_HUMAN	CLGEKWSHPPSCIK	Carbamidomethyl(C)@1; Carbamidomethyl(C)@12	missed K-W@5	1	P08603
sp|P08603|CFAH_HUMAN	CLHPCVISR	Carbamidomethyl(C)@1; Carbamidomethyl(C)@5		2	P08603, Q03591
sp|P08603|CFAH_HUMAN	CLPVTAPENGK	Carbamidomethyl(C)@1		1	P08603
sp|P08603|CFAH_HUMAN	CLPVTAPENGKIVSSAMEPDREYHFGQAVR	Carbamidomethyl(C)@1; Deamidated(N)@9	missed K-I@11; missed R-E@21	1	P08603
sp|P08603|CFAH_HUMAN	CNMGYEYSER	Carbamidomethyl(C)@1		1	P08603
sp|P08603|CFAH_HUMAN	CTLKPCDYPDIK	Carbamidomethyl(C)@1; Carbamidomethyl(C)@6		1	P08603
sp|P08603|CFAH_HUMAN	CTSTGWIPAPR	Carbamidomethyl(C)@1		1	P08603
sp|P08603|CFAH_HUMAN	CVEISCK	Carbamidomethyl(C)@1; Carbamidomethyl(C)@6		1	P08603
sp|P08603|CFAH_HUMAN	CVEISCKSPDVINGSPISQK	Carbamidomethyl(C)@1; Carbamidomethyl(C)@6; Deamidated(N)@13	missed K-S@7	1	P08603
sp|P08603|CFAH_HUMAN	CYFPYLENGYNQNYGR	Carbamidomethyl(C)@1; Deamidated(N)@8		2	P08603, Q02985
sp|P08603|CFAH_HUMAN	CYFPYLENGYNQNYGRK	Carbamidomethyl(C)@1	missed R-K@16	2	P08603, Q02985
sp|P08603|CFAH_HUMAN	DGEKVSVLCQENYLIQEGEEITCKDGR	Carbamidomethyl(C)@9; Carbamidomethyl(C)@23	missed K-V@4; missed K-D@24	1	P08603
sp|P08603|CFAH_HUMAN	DGRWQSIPLCVEK	Carbamidomethyl(C)@10	missed R-W@3	1	P08603
sp|P08603|CFAH_HUMAN	DGWSAQPTCIK	Carbamidomethyl(C)@9		1	P08603
sp|P08603|CFAH_HUMAN	DQYKVGEVLK		missed K-V@4	1	P08603
sp|P08603|CFAH_HUMAN	DTSCVNPPTVQNAY	Carbamidomethyl(C)@4	cleaved Y-I@C-term	2	P08603, Q03591
sp|P08603|CFAH_HUMAN	DTSCVNPPTVQNAYIVSR	Carbamidomethyl(C)@4; Deamidated(N)@12		1	P08603
sp|P08603|CFAH_HUMAN	DVACHPGYALPK	Carbamidomethyl(C)@4	cleaved I-D@N-term	1	P08603
sp|P08603|CFAH_HUMAN	DVYKAGEQVTYTCATYYK	Carbamidomethyl(C)@13	missed K-A@4	1	P08603
sp|P08603|CFAH_HUMAN	ECDTDGWTNDIPICEVVK	Carbamidomethyl(C)@2; Carbamidomethyl(C)@14		1	P08603
sp|P08603|CFAH_HUMAN	ECELPKIDVHLVPDR	Carbamidomethyl(C)@2	missed K-I@6	1	P08603
sp|P08603|CFAH_HUMAN	ECELPKIDVHLVPDRK	Carbamidomethyl(C)@2	missed K-I@6; missed R-K@15	1	P08603
sp|P08603|CFAH_HUMAN	EDCNELPPR	Carbamidomethyl(C)@3	cleaved A-E@N-term	1	P08603
sp|P08603|CFAH_HUMAN	EDCNELPPRR	Carbamidomethyl(C)@3	cleaved A-E@N-term; missed R-R@9	1	P08603
sp|P08603|CFAH_HUMAN	EEYGHSEVVEYYCNPR	Carbamidomethyl(C)@13		1	P08603
sp|P08603|CFAH_HUMAN	EFDHNSNIR	Glu->pyro-Glu@N-term		1	P08603
sp|P08603|CFAH_HUMAN	EGWIHTVCINGR	Carbamidomethyl(C)@8; Deamidated(N)@10		1	P08603
sp|P08603|CFAH_HUMAN	EIMENYNIALR			2	P08603, Q03591
sp|P08603|CFAH_HUMAN	EKPKCVEISCKSPDVINGSPISQK	Carbamidomethyl(C)@5; Carbamidomethyl(C)@10	missed K-C@4; missed K-S@11	1	P08603
sp|P08603|CFAH_HUMAN	EKTKEEYGHSEVVEYYCNPR	Carbamidomethyl(C)@17	missed K-T@2; missed K-E@4	1	P08603
sp|P08603|CFAH_HUMAN	EQVQSCGPPPELLNGNVK	Carbamidomethyl(C)@6; Deamidated(N)@14		1	P08603
sp|P08603|CFAH_HUMAN	EQVQSCGPPPELLNGNVKEK	Carbamidomethyl(C)@6; Deamidated(N)@14	missed K-E@18	1	P08603
sp|P08603|CFAH_HUMAN	FVCNSGYK	Carbamidomethyl(C)@3		1	P08603
sp|P08603|CFAH_HUMAN	GDAVCTESGWRPLPSCEEK	Carbamidomethyl(C)@5; Carbamidomethyl(C)@16		1	P08603
sp|P08603|CFAH_HUMAN	GEQVTYTCATYYK	Carbamidomethyl(C)@8	cleaved A-G@N-term	1	P08603
sp|P08603|CFAH_HUMAN	GEWVALNPLR			1	P08603
sp|P08603|CFAH_HUMAN	GEWVALNPLRK		missed R-K@10	1	P08603
sp|P08603|CFAH_HUMAN	GHPGDTPFGTFTLTGGNVFEYGVK		cleaved C-G@N-term	1	P08603
sp|P08603|CFAH_HUMAN	GKEGWIHTVCINGR	Carbamidomethyl(C)@10; Deamidated(N)@12	missed K-E@2	1	P08603
sp|P08603|CFAH_HUMAN	HGGLYHENMR			2	P08603, Q02985
sp|P08603|CFAH_HUMAN	HRTGDEITYQCR	Carbamidomethyl(C)@11	missed R-T@2	1	P08603
sp|P08603|CFAH_HUMAN	IDVHLVPDR			1	P08603
sp|P08603|CFAH_HUMAN	IDVHLVPDRK		missed R-K@9	1	P08603
sp|P08603|CFAH_HUMAN	IDVHLVPDRKK		missed R-K@9; missed K-K@10	1	P08603
sp|P08603|CFAH_HUMAN	IDVHLVPDRKKDQYK		missed R-K@9; missed K-K@10; missed K-D@11	1	P08603
sp|P08603|CFAH_HUMAN	IEGDEEMHCSDDGFWSK	Carbamidomethyl(C)@9		1	P08603
sp|P08603|CFAH_HUMAN	IIYKENERFQYK		missed K-E@4; missed R-F@8	1	P08603
sp|P08603|CFAH_HUMAN	IPCSQPPQIEHGTINSSR	Carbamidomethyl(C)@3		1	P08603
sp|P08603|CFAH_HUMAN	ITCRNGQWSEPPKCLHPCVISR	Carbamidomethyl(C)@3; Deamidated(N)@5; Carbamidomethyl(C)@14; Carbamidomethyl(C)@18	missed R-N@4; missed K-C@13	2	P08603, Q03591
sp|P08603|CFAH_HUMAN	IVSSAMEPDREYHFGQAVR	Dethiomethyl(M)@6	missed R-E@10	1	P08603
sp|P08603|CFAH_HUMAN	KCYFPYLENGYNQNYGR	Carbamidomethyl(C)@2; Deamidated(N)@9	missed K-C@1	2	P08603, Q02985
sp|P08603|CFAH_HUMAN	KCYFPYLENGYNQNYGRK	Carbamidomethyl(C)@2	missed K-C@1; missed R-K@17	2	P08603, Q02985
sp|P08603|CFAH_HUMAN	KDQYKVGEVLK		missed K-D@1; missed K-V@5	1	P08603
sp|P08603|CFAH_HUMAN	KDVYKAGEQVTYTCATYYK	Carbamidomethyl(C)@14	missed K-D@1; missed K-A@5	1	P08603
sp|P08603|CFAH_HUMAN	KGEWVALNPLR		missed K-G@1	1	P08603
sp|P08603|CFAH_HUMAN	KGEWVALNPLRK	Oxidation(W)@4	missed K-G@1; missed R-K@11	1	P08603
sp|P08603|CFAH_HUMAN	KKDQYKVGEVLK		missed K-K@1; missed K-D@2; missed K-V@6	1	P08603
sp|P08603|CFAH_HUMAN	LGYVTADGETSGSITCGK	Carbamidomethyl(C)@16		1	P08603
sp|P08603|CFAH_HUMAN	LGYVTADGETSGSITCGKDGWSAQPTCIK	Carbamidomethyl(C)@16; Carbamidomethyl(C)@27	missed K-D@18	1	P08603
sp|P08603|CFAH_HUMAN	LSYTCEGGFR	Carbamidomethyl(C)@5		1	P08603
sp|P08603|CFAH_HUMAN	NGFYPATR	Deamidated(N)@1		1	P08603
sp|P08603|CFAH_HUMAN	NGQWSEPPK			3	P08603, P36980, Q03591
sp|P08603|CFAH_HUMAN	NGQWSEPPKCLHPCVISR	Carbamidomethyl(C)@10; Carbamidomethyl(C)@14	missed K-C@9	2	P08603, Q03591
sp|P08603|CFAH_HUMAN	NKKEFDHNSNIR		missed K-K@2; missed K-E@3	1	P08603
sp|P08603|CFAH_HUMAN	NSVQCYHFGLSPDLPICK	Carbamidomethyl(C)@5; Carbamidomethyl(C)@17	cleaved P-N@N-term	1	P08603
sp|P08603|CFAH_HUMAN	NTEILTGSWSDQTYPEGTQAIYK			1	P08603
sp|P08603|CFAH_HUMAN	QMSKYPSGER	Gln->pyro-Glu@N-term; Oxidation(M)@2	missed K-Y@4	2	P08603, Q03591
sp|P08603|CFAH_HUMAN	RDTSCVNPPTVQNAYIVSR	Dioxidation(R)@1; Carbamidomethyl(C)@5	cleaved C-R@N-term; missed R-D@1	1	P08603
sp|P08603|CFAH_HUMAN	RNTEILTGSWSDQTYPEGTQAIYK		missed R-N@1	1	P08603
sp|P08603|CFAH_HUMAN	RPYFPVAVGK			2	P08603, Q02985
sp|P08603|CFAH_HUMAN	SCDIPVFMNAR	Carbamidomethyl(C)@2		1	P08603
sp|P08603|CFAH_HUMAN	SCDNPYIPNGDYSPLR	Carbamidomethyl(C)@2		1	P08603
sp|P08603|CFAH_HUMAN	SIDVACHPGYALPK	Carbamidomethyl(C)@6		1	P08603
sp|P08603|CFAH_HUMAN	SITCIHGVWTQLPQCVAIDK	Carbamidomethyl(C)@4; Deamidated(Q)@11; Carbamidomethyl(C)@15		1	P08603
sp|P08603|CFAH_HUMAN	SITCIHGVWTQLPQCVAIDKLK	Carbamidomethyl(C)@4; Carbamidomethyl(C)@15	missed K-L@20	1	P08603
sp|P08603|CFAH_HUMAN	SITCIHGVWTQLPQCVAIDKLKK	Carbamidomethyl(C)@4; Carbamidomethyl(C)@15	missed K-L@20; missed K-K@22	1	P08603
sp|P08603|CFAH_HUMAN	SLGNVIMVCR	Carbamidomethyl(C)@9		1	P08603
sp|P08603|CFAH_HUMAN	SLGNVIMVCRK	Carbamidomethyl(C)@9	missed R-K@10	1	P08603
sp|P08603|CFAH_HUMAN	SPDVINGSPISQK			1	P08603
sp|P08603|CFAH_HUMAN	SPPEISHGVVAH		cleaved H-M@C-term	1	P08603
sp|P08603|CFAH_HUMAN	SSIDIENGFISESQYTYALKEK		missed K-E@20	1	P08603
sp|P08603|CFAH_HUMAN	SSNLIILEEHLK			1	P08603
sp|P08603|CFAH_HUMAN	SSQESYAHGTKLSYTCEGGFR	Deamidated(Q)@3; Carbamidomethyl(C)@16	missed K-L@11	1	P08603
sp|P08603|CFAH_HUMAN	TDCLSLPSFENAIPMGEK	Carbamidomethyl(C)@3; Cation:K(E)@10		1	P08603
sp|P08603|CFAH_HUMAN	TDCLSLPSFENAIPMGEKK	Carbamidomethyl(C)@3	missed K-K@18	1	P08603
sp|P08603|CFAH_HUMAN	TDCLSLPSFENAIPMGEKKDVYK	Carbamidomethyl(C)@3	missed K-K@18; missed K-D@19	1	P08603
sp|P08603|CFAH_HUMAN	TGDEITYQCR	Carbamidomethyl(C)@9		1	P08603
sp|P08603|CFAH_HUMAN	TGDEITYQCRNGFYPATR	Carbamidomethyl(C)@9; Deamidated(N)@11	missed R-N@10	1	P08603
sp|P08603|CFAH_HUMAN	TGESVEFVCK	Carbamidomethyl(C)@9		2	P08603, Q03591
sp|P08603|CFAH_HUMAN	TGESVEFVCKR	Carbamidomethyl(C)@9	missed K-R@10	2	P08603, Q03591
sp|P08603|CFAH_HUMAN	TGESVEFVCKRGYR	Carbamidomethyl(C)@9	missed K-R@10; missed R-G@11	2	P08603, Q03591
sp|P08603|CFAH_HUMAN	TKEEYGHSEVVEYYCNPR	Carbamidomethyl(C)@15	missed K-E@2	1	P08603
sp|P08603|CFAH_HUMAN	TKNDFTWFK		missed K-N@2	1	P08603
sp|P08603|CFAH_HUMAN	TTCWDGKLEYPTCA	Carbamidomethyl(C)@3; Carbamidomethyl(C)@13	cleaved A-K@C-term; missed K-L@7	2	P08603, Q03591
sp|P08603|CFAH_HUMAN	TTCWDGKLEYPTCAK	Carbamidomethyl(C)@3; Carbamidomethyl(C)@13	missed K-L@7	2	P08603, Q03591
sp|P08603|CFAH_HUMAN	VTCINSRWTGRPTCRDTSCVNPPTVQNAYIVSR	Carbamidomethyl(C)@3; Carbamidomethyl(C)@14; Carbamidomethyl(C)@19	cleaved N-V@N-term; missed R-W@7; missed R-D@15	1	P08603
sp|P08603|CFAH_HUMAN	WQSIPLCVEK	Carbamidomethyl(C)@7		1	P08603
sp|P08603|CFAH_HUMAN	WSHPPSCIK	Carbamidomethyl(C)@7		1	P08603
sp|P08603|CFAH_HUMAN	WSHPPSCIKTDCLSLPSFENAIPMGEK	Carbamidomethyl(C)@7; Carbamidomethyl(C)@12	missed K-T@9	1	P08603
sp|P08603|CFAH_HUMAN	WSHPPSCIKTDCLSLPSFENAIPMGEKK	Carbamidomethyl(C)@7; Carbamidomethyl(C)@12	missed K-T@9; missed K-K@27	1	P08603
sp|P08603|CFAH_HUMAN	WSHPPSCIKTDCLSLPSFENAIPMGEKKDVYK	Carbamidomethyl(C)@7; Carbamidomethyl(C)@12	missed K-T@9; missed K-K@27; missed K-D@28	1	P08603
sp|P08603|CFAH_HUMAN	WSSPPQCEGLPCK	Carbamidomethyl(C)@7; Carbamidomethyl(C)@12		1	P08603
sp|P08603|CFAH_HUMAN	WTGRPTCRDTSCVNPPTVQNAYIVSR	Carbamidomethyl(C)@7; Carbamidomethyl(C)@12	missed R-D@8	1	P08603
sp|P08603|CFAH_HUMAN	YVTADGETSGSITCGK	Carbamidomethyl(C)@14	cleaved G-Y@N-term	1	P08603
sp|P08603|CFAH_HUMAN	DVINGSPISQK		cleaved P-D@N-term	1	P08603
sp|P08603|CFAH_HUMAN	FSCKPGFTIVGPN	Carbamidomethyl(C)@3	cleaved N-S@C-term	1	P08603
sp|P08603|CFAH_HUMAN	SPPEISHGVVAHMSDSYQYGEEVTYK	Oxidation(M)@13; Deamidated(Q)@18		1	P08603
sp|P08603|CFAH_HUMAN	ISEENETTCYMGK	Carbamidomethyl(C)@9		1	P08603
sp|P08603|CFAH_HUMAN	ITCRNGQWSEPPK	Carbamidomethyl(C)@3; Deamidated(N)@5	missed R-N@4	3	P08603, P36980, Q03591
sp|P08603|CFAH_HUMAN	CDIPVFMNAR	Carbamidomethyl(C)@1	cleaved S-C@N-term	1	P08603
sp|P08603|CFAH_HUMAN	IIYKENER		missed K-E@4	1	P08603
sp|P08603|CFAH_HUMAN	FSCKPGFTIVGP	Carbamidomethyl(C)@3	cleaved P-N@C-term	1	P08603
sp|P08603|CFAH_HUMAN	KGEWVALNPL		cleaved L-R@C-term; missed K-G@1	1	P08603
sp|P08603|CFAH_HUMAN	IVSSAMEPDR			1	P08603
sp|P08603|CFAH_HUMAN	WQSIPLCVEKIPCSQPPQIEHGTINSSR	Carbamidomethyl(C)@7; Carbamidomethyl(C)@13	missed K-I@10	1	P08603
sp|P08603|CFAH_HUMAN	YFPVAVGK		cleaved P-Y@N-term	2	P08603, Q02985
sp|P08603|CFAH_HUMAN	PPTVQNAYIVSR		cleaved N-P@N-term	1	P08603
sp|P08603|CFAH_HUMAN	WQSIPLCVEKIPC	Carbamidomethyl(C)@7; Carbamidomethyl(C)@13	cleaved C-S@C-term; missed K-I@10	1	P08603
sp|P08603|CFAH_HUMAN	ACHPGYALPK	Carbamidomethyl(C)@2	cleaved V-A@N-term	2	P08603, Q02985
sp|P08603|CFAH_HUMAN	NDFTWFK			1	P08603
sp|P08603|CFAH_HUMAN	GESVEFVCK	Carbamidomethyl@N-term; Carbamidomethyl(C)@8	cleaved T-G@N-term	2	P08603, Q03591
sp|P08603|CFAH_HUMAN	VHLVPDR		cleaved D-V@N-term	1	P08603
sp|P08603|CFAH_HUMAN	SSPPQCEGLPCK	Carbamidomethyl(C)@6; Carbamidomethyl(C)@11	cleaved W-S@N-term	1	P08603
sp|P08603|CFAH_HUMAN	TGESVEFVCKRG	Carbamidomethyl(C)@9	cleaved G-Y@C-term; missed K-R@10; missed R-G@11	2	P08603, Q03591
sp|P08603|CFAH_HUMAN	TLTGGNVFEYGVK		cleaved F-T@N-term	1	P08603
sp|P08603|CFAH_HUMAN	LYSRTGESVEFVCKR	Carbamidomethyl(C)@13	missed R-T@4; missed K-R@14	1	P08603
sp|P08603|CFAH_HUMAN	SPPQCEGLPCK	Carbamidomethyl(C)@5; Carbamidomethyl(C)@10	cleaved S-S@N-term	1	P08603
sp|P08603|CFAH_HUMAN	EYHFGQAVR			1	P08603
sp|P08603|CFAH_HUMAN	DVHLVPDR		cleaved I-D@N-term	1	P08603
sp|P08603|CFAH_HUMAN	EWVALNPLR		cleaved G-E@N-term	1	P08603
sp|P08603|CFAH_HUMAN	FPVAVGK		cleaved Y-F@N-term	2	P08603, Q02985
sp|P08603|CFAH_HUMAN	EDCNELPPRRNTEILTGSWSDQTYPEGTQAIYK	Carbamidomethyl(C)@3	cleaved A-E@N-term; missed R-R@9; missed R-N@10	1	P08603
sp|P08603|CFAH_HUMAN	SYTCEGGFR	Carbamidomethyl(C)@4	cleaved L-S@N-term	1	P08603
sp|P08603|CFAH_HUMAN	GWSPAVPCLR	Carbamidomethyl(C)@8	cleaved D-G@N-term	2	P08603, Q02985
sp|P08603|CFAH_HUMAN	FSCKPGF	Carbamidomethyl(C)@3	cleaved F-T@C-term	1	P08603
sp|P08603|CFAH_HUMAN	YNIALR		cleaved N-Y@N-term	4	P08603, Q8WXU2, P42681, Q03591
sp|P08603|CFAH_HUMAN	NLIILEEHLK		cleaved S-N@N-term	1	P08603
sp|P08603|CFAH_HUMAN	QDGWSPAVPCLR	Carbamidomethyl(C)@10	cleaved T-Q@N-term	1	P08603
sp|P08603|CFAH_HUMAN	CSQPPQIEHGTINSSR	Carbamidomethyl(C)@1; Deamidated(Q)@3	cleaved P-C@N-term	1	P08603
sp|P08603|CFAH_HUMAN	CGPPPPIDNGDITSFPLSVYAPASSVEYQCQNLYQLEGNKR	Carbamidomethyl(C)@1; Ammonia-loss(N)@9; Carbamidomethyl(C)@30	missed K-R@40	2	P08603, Q03591
sp|P08603|CFAH_HUMAN	CRGKEGWIHTVCINGR	Carbamidomethyl(C)@1; Deamidated(R)@2; Dehydrated(E)@5; Carbamidomethyl(C)@12	missed R-G@2; missed K-E@4	1	P08603
sp|P08603|CFAH_HUMAN	SVEFVCKR	Carbamidomethyl(C)@6	cleaved E-S@N-term; missed K-R@7	2	P08603, Q03591
sp|P08603|CFAH_HUMAN	LLGEINYR		cleaved Q-L@N-term	1	P08603
sp|P08603|CFAH_HUMAN	EKAKYQCKLGYVTADGETSGSITCGK	Delta:H(4)C(2)@N-term; GlnThrGlyGly(K)@2; Carbamidomethyl(C)@7; Carbamidomethyl(C)@24	missed K-A@2; missed K-Y@4; missed K-L@8	1	P08603
sp|P08603|CFAH_HUMAN	CTLKPCDYPDIKHGGLYHENMR	Carbamidomethyl(C)@1; Carbamidomethyl(C)@6; Deoxy(D)@7	missed K-H@12	1	P08603
sp|P08603|CFAH_HUMAN	GNVIMVCR	Dethiomethyl(M)@5; Carbamidomethyl(C)@7	cleaved L-G@N-term	1	P08603
sp|P08603|CFAH_HUMAN	KEEYGHSEVVEYYCNPR	Carbamidomethyl(C)@14	cleaved T-K@N-term; missed K-E@1	1	P08603
sp|P08603|CFAH_HUMAN	PTCRDTSCVNPPTVQNAYIVSR	Acetyl@N-term; Carbamidomethyl(C)@3; Carbamidomethyl(D)@5; Carbamidomethyl(C)@8	cleaved R-P@N-term; missed R-D@4	1	P08603
sp|P08603|CFAH_HUMAN	FPYLENGYNQNYGRK	PhosphoUridine(Y)@3	cleaved Y-F@N-term; missed R-K@14	2	P08603, Q02985
sp|P08603|CFAH_HUMAN	KFVQGK	Acetyl@N-term; Deamidated(Q)@4	missed K-F@1	2	P08603, Q96FE5
sp|P08603|CFAH_HUMAN	PRCIRVKTCSKSSIDIENGFISESQYTYALKEKAKYQCKLGYVTADGETSGSITCGK	Carbamidomethyl(C)@3; Carbamidomethyl(C)@9; Carbamidomethyl(C)@38; Carbamidomethyl(C)@55	cleaved T-P@N-term; missed R-C@2; missed R-V@5; missed K-T@7; missed K-S@11; missed K-E@31; missed K-A@33; missed K-Y@35; missed K-L@39	1	P08603
sp|P08603|CFAH_HUMAN	QCVAIDKLK	Deamidated(Q)@1; Carbamidomethyl(C)@2	cleaved P-Q@N-term; missed K-L@7	1	P08603
sp|P08603|CFAH_HUMAN	RPTCRDTSCVNPPTVQNAYIVSR	Carbamidomethyl(C)@4; Carbamidomethyl(C)@9; Deamidated(N)@11	cleaved G-R@N-term; missed R-D@5	1	P08603
sp|P08603|CFAH_HUMAN	SHTLRTTCWDGKLEYPTCAK	Methyl(H)@2; Carbamidomethyl(C)@8; Carbamidomethyl(C)@18	missed R-T@5; missed K-L@12	2	P08603, Q03591
sp|P08603|CFAH_HUMAN	AGEQVTYTCATYYK	Carbamidomethyl(C)@9		1	P08603
sp|P08603|CFAH_HUMAN	AGEQVTYTCATYYK	Carbamidomethyl(C)@9		1	P08603
sp|P08603|CFAH_HUMAN	AGEQVTYTCATYYK	Carbamidomethyl(C)@9		1	P08603
sp|P08603|CFAH_HUMAN	AGEQVTYTCATYYK	Carbamidomethyl(C)@9		1	P08603
sp|P08603|CFAH_HUMAN	AGEQVTYTCATYYK	Carbamidomethyl(C)@9		1	P08603
sp|P08603|CFAH_HUMAN	AGEQVTYTCATYYK	Carbamidomethyl(C)@9		1	P08603
sp|P08603|CFAH_HUMAN	AGEQVTYTCATYYK	Carbamidomethyl(C)@9		1	P08603
sp|P08603|CFAH_HUMAN	AGEQVTYTCATYYK	Carbamidomethyl(C)@9		1	P08603
sp|P08603|CFAH_HUMAN	AGEQVTYTCATYYK	Carbamidomethyl(C)@9		1	P08603
sp|P08603|CFAH_HUMAN	AGEQVTYTCATYYK	Carbamidomethyl(C)@9		1	P08603
sp|P08603|CFAH_HUMAN	AGEQVTYTCATYYK	Carbamidomethyl(C)@9		1	P08603
sp|P08603|CFAH_HUMAN	AGEQVTYTCATYYK	Carbamidomethyl(C)@9		1	P08603
sp|P08603|CFAH_HUMAN	AGEQVTYTCATYYK	Carbamidomethyl(C)@9		1	P08603
sp|P08603|CFAH_HUMAN	AGEQVTYTCATYYK	Carbamidomethyl(C)@9		1	P08603
sp|P08603|CFAH_HUMAN	AGEQVTYTCATYYK	Carbamidomethyl(C)@9		1	P08603
sp|P08603|CFAH_HUMAN	AGEQVTYTCATYYK	Carbamidomethyl(C)@9		1	P08603
sp|P08603|CFAH_HUMAN	AGEQVTYTCATYYK	Carbamidomethyl(C)@9		1	P08603
sp|P08603|CFAH_HUMAN	AGEQVTYTCATYYK	Carbamidomethyl(C)@9		1	P08603
sp|P08603|CFAH_HUMAN	AGEQVTYTCATYYK	Carbamidomethyl(C)@9		1	P08603
sp|P08603|CFAH_HUMAN	AGEQVTYTCATYYK	Carbamidomethyl(C)@9		1	P08603
sp|P08603|CFAH_HUMAN	AGEQVTYTCATYYK	Carbamidomethyl(C)@9		1	P08603
sp|P08603|CFAH_HUMAN	AGEQVTYTCATYYK	Carbamidomethyl(C)@9		1	P08603
sp|P08603|CFAH_HUMAN	AGEQVTYTCATYYK	Carbamidomethyl(C)@9		1	P08603
sp|P08603|CFAH_HUMAN	AGEQVTYTCATYYK	Carbamidomethyl(C)@9		1	P08603
sp|P08603|CFAH_HUMAN	AGEQVTYTCATYYK	Carbamidomethyl(C)@9		1	P08603
sp|P08603|CFAH_HUMAN	AGEQVTYTCATYYK	Carbamidomethyl(C)@9		1	P08603
sp|P08603|CFAH_HUMAN	AGEQVTYTCATYYK	Carbamidomethyl(C)@9		1	P08603
sp|P08603|CFAH_HUMAN	AGEQVTYTCATYYK	Carbamidomethyl(C)@9		1	P08603
sp|P08603|CFAH_HUMAN	AGEQVTYTCATYYK	Carbamidomethyl(C)@9		1	P08603
sp|P08603|CFAH_HUMAN	AGEQVTYTCATYYK	Carbamidomethyl(C)@9		1	P08603
sp|P08603|CFAH_HUMAN	AGEQVTYTCATYYK	Deamidated(Q)@4; Carbamidomethyl(C)@9		1	P08603
sp|P08603|CFAH_HUMAN	AGEQVTYTCATYYK	Carbamidomethyl(C)@9		1	P08603
sp|P08603|CFAH_HUMAN	AGEQVTYTCATYYK	Carbamidomethyl(C)@9		1	P08603
sp|P08603|CFAH_HUMAN	AGEQVTYTCATYYK	Carbamidomethyl(C)@9		1	P08603
sp|P08603|CFAH_HUMAN	AGEQVTYTCATYYK	Carbamidomethyl(C)@9		1	P08603
sp|P08603|CFAH_HUMAN	AGEQVTYTCATYYK	Deamidated(Q)@4; Carbamidomethyl(C)@9		1	P08603
sp|P08603|CFAH_HUMAN	AGEQVTYTCATYYK	Iodo(Y)@7; Carbamidomethyl(C)@9		1	P08603
sp|P08603|CFAH_HUMAN	AGEQVTYTCATYYK	Methyl(T)@8; Carbamidomethyl(C)@9		1	P08603
sp|P08603|CFAH_HUMAN	AGEQVTYTCATYYK	Deamidated(Q)@4; Carbamidomethyl(C)@9		1	P08603
sp|P08603|CFAH_HUMAN	AGEQVTYTCATYYK	Carbamidomethyl(C)@9		1	P08603
sp|P08603|CFAH_HUMAN	ALKEKAKYQCKLGYVTADGETSGSITCGK	Carbamyl@N-term; Oxidation(Y)@8; Carbamidomethyl(C)@10; Carbamidomethyl(C)@27	cleaved Y-A@N-term; missed K-E@3; missed K-A@5; missed K-Y@7; missed K-L@11	1	P08603
sp|P08603|CFAH_HUMAN	AQTTVTCMENGWSPTPR	Carbamidomethyl(C)@7; Oxidation(M)@8		1	P08603
sp|P08603|CFAH_HUMAN	AQTTVTCMENGWSPTPR	Carbamidomethyl(C)@7		1	P08603
sp|P08603|CFAH_HUMAN	AQTTVTCMENGWSPTPR	Carbamidomethyl(C)@7		1	P08603
sp|P08603|CFAH_HUMAN	AQTTVTCMENGWSPTPR	Carbamidomethyl(C)@7		1	P08603
sp|P08603|CFAH_HUMAN	AQTTVTCMENGWSPTPR	Carbamidomethyl(C)@7		1	P08603
sp|P08603|CFAH_HUMAN	AQTTVTCMENGWSPTPR	Carbamidomethyl(C)@7; Deamidated(N)@10		1	P08603
sp|P08603|CFAH_HUMAN	AQTTVTCMENGWSPTPR	Carbamidomethyl(C)@7		1	P08603
sp|P08603|CFAH_HUMAN	AQTTVTCMENGWSPTPR	Carbamidomethyl(C)@7		1	P08603
sp|P08603|CFAH_HUMAN	AQTTVTCMENGWSPTPR	Carbamidomethyl(C)@7		1	P08603
sp|P08603|CFAH_HUMAN	AQTTVTCMENGWSPTPR	Carbamidomethyl(C)@7		1	P08603
sp|P08603|CFAH_HUMAN	AQTTVTCMENGWSPTPR	Carbamidomethyl(C)@7		1	P08603
sp|P08603|CFAH_HUMAN	AQTTVTCMENGWSPTPR	Carbamidomethyl(C)@7		1	P08603
sp|P08603|CFAH_HUMAN	AQTTVTCMENGWSPTPR	Carbamidomethyl(C)@7		1	P08603
sp|P08603|CFAH_HUMAN	AQTTVTCMENGWSPTPR	Carbamidomethyl(C)@7		1	P08603
sp|P08603|CFAH_HUMAN	AQTTVTCMENGWSPTPR	Carbamidomethyl(C)@7		1	P08603
sp|P08603|CFAH_HUMAN	AQTTVTCMENGWSPTPR	Carbamidomethyl(C)@7		1	P08603
sp|P08603|CFAH_HUMAN	AQTTVTCMENGWSPTPR	Carbamidomethyl(C)@7		1	P08603
sp|P08603|CFAH_HUMAN	AQTTVTCMENGWSPTPR	Carbamidomethyl(C)@7		1	P08603
sp|P08603|CFAH_HUMAN	AQTTVTCMENGWSPTPR	Carbamidomethyl(C)@7		1	P08603
sp|P08603|CFAH_HUMAN	AQTTVTCMENGWSPTPR	Carbamidomethyl(C)@7		1	P08603
sp|P08603|CFAH_HUMAN	AQTTVTCMENGWSPTPR	Carbamidomethyl(C)@7		1	P08603
sp|P08603|CFAH_HUMAN	AQTTVTCMENGWSPTPR	Carbamidomethyl(C)@7		1	P08603
sp|P08603|CFAH_HUMAN	AQTTVTCMENGWSPTPR	Carbamidomethyl(C)@7; Deamidated(N)@10		1	P08603
sp|P08603|CFAH_HUMAN	AQTTVTCMENGWSPTPR	Carbamidomethyl(C)@7; Oxidation(M)@8; Deamidated(N)@10		1	P08603
sp|P08603|CFAH_HUMAN	AQTTVTCMENGWSPTPR	Carbamidomethyl(C)@7; Oxidation(M)@8; Deamidated(N)@10		1	P08603
sp|P08603|CFAH_HUMAN	AQTTVTCMENGWSPTPR	Carbamidomethyl(C)@7; Deamidated(N)@10		1	P08603
sp|P08603|CFAH_HUMAN	AQTTVTCMENGWSPTPR	Carbamidomethyl(C)@7; Deamidated(N)@10		1	P08603
sp|P08603|CFAH_HUMAN	AQTTVTCMENGWSPTPR	Carbamidomethyl(C)@7; Deamidated(N)@10		1	P08603
sp|P08603|CFAH_HUMAN	AQTTVTCMENGWSPTPR	Carbamidomethyl(C)@7; Deamidated(N)@10		1	P08603
sp|P08603|CFAH_HUMAN	AQTTVTCMENGWSPTPR	Carbamidomethyl(C)@7		1	P08603
sp|P08603|CFAH_HUMAN	AQTTVTCMENGWSPTPR	Carbamidomethyl(C)@7; Deamidated(N)@10		1	P08603
sp|P08603|CFAH_HUMAN	AQTTVTCMENGWSPTPR	Carbamidomethyl(C)@7; Deamidated(N)@10		1	P08603
sp|P08603|CFAH_HUMAN	AQTTVTCMENGWSPTPR	Carbamidomethyl(C)@7; Deamidated(N)@10		1	P08603
sp|P08603|CFAH_HUMAN	AQTTVTCMENGWSPTPR	Carbamidomethyl(C)@7; Deamidated(N)@10		1	P08603
sp|P08603|CFAH_HUMAN	AQTTVTCMENGWSPTPR	Deamidated(Q)@2; Carbamidomethyl(C)@7; Deamidated(N)@10		1	P08603
sp|P08603|CFAH_HUMAN	AQTTVTCMENGWSPTPR	Carbamidomethyl(C)@7; Deamidated(N)@10		1	P08603
sp|P08603|CFAH_HUMAN	AQTTVTCMENGWSPTPR	Carbamidomethyl(C)@7; Deamidated(N)@10		1	P08603
sp|P08603|CFAH_HUMAN	AQTTVTCMENGWSPTPR	Carbamidomethyl(C)@7; Deamidated(N)@10		1	P08603
sp|P08603|CFAH_HUMAN	AQTTVTCMENGWSPTPR	Carbamidomethyl(C)@7; Deamidated(N)@10		1	P08603
sp|P08603|CFAH_HUMAN	AQTTVTCMENGWSPTPR	Carbamidomethyl(C)@7; Deamidated(N)@10		1	P08603
sp|P08603|CFAH_HUMAN	AQTTVTCMENGWSPTPR	Carbamidomethyl(C)@7		1	P08603
sp|P08603|CFAH_HUMAN	AQTTVTCMENGWSPTPR	Carbamidomethyl(C)@7; Deamidated(N)@10		1	P08603
sp|P08603|CFAH_HUMAN	AQTTVTCMENGWSPTPR	Carbamidomethyl(C)@7; Deamidated(N)@10		1	P08603
sp|P08603|CFAH_HUMAN	AQTTVTCMENGWSPTPR	Carbamidomethyl(C)@7; Deamidated(N)@10		1	P08603
sp|P08603|CFAH_HUMAN	AQTTVTCMENGWSPTPR	Carbamidomethyl(C)@7; Deamidated(N)@10		1	P08603
sp|P08603|CFAH_HUMAN	AQTTVTCMENGWSPTPR	Carbamidomethyl(C)@7; Deamidated(N)@10		1	P08603
sp|P08603|CFAH_HUMAN	AQTTVTCMENGWSPTPR	Carbamidomethyl(C)@7; Deamidated(N)@10		1	P08603
sp|P08603|CFAH_HUMAN	AQTTVTCMENGWSPTPR	Deamidated(Q)@2; Carbamidomethyl(C)@7; Deamidated(N)@10		1	P08603
sp|P08603|CFAH_HUMAN	AQTTVTCMENGWSPTPR	Carbamidomethyl(C)@7; Deamidated(N)@10		1	P08603
sp|P08603|CFAH_HUMAN	AQTTVTCMENGWSPTPR	Carbamidomethyl(C)@7; Deamidated(N)@10		1	P08603
sp|P08603|CFAH_HUMAN	AQTTVTCMENGWSPTPR	Deamidated(Q)@2; Carbamidomethyl(C)@7; Deamidated(N)@10		1	P08603
sp|P08603|CFAH_HUMAN	AQTTVTCMENGWSPTPR	Carbamidomethyl(C)@7; Oxidation(M)@8; Deamidated(N)@10		1	P08603
sp|P08603|CFAH_HUMAN	AQTTVTCMENGWSPTPR	Carbamidomethyl(C)@7; Oxidation(M)@8		1	P08603
sp|P08603|CFAH_HUMAN	AQTTVTCMENGWSPTPR	Carbamidomethyl(C)@7; Oxidation(M)@8; Deamidated(N)@10		1	P08603
sp|P08603|CFAH_HUMAN	AQTTVTCMENGWSPTPR	Carbamidomethyl(C)@7; Deamidated(N)@10		1	P08603
sp|P08603|CFAH_HUMAN	AQTTVTCMENGWSPTPR	Carbamidomethyl(C)@7		1	P08603
sp|P08603|CFAH_HUMAN	AQTTVTCMENGWSPTPR	Carbamidomethyl(C)@7; Deamidated(N)@10		1	P08603
sp|P08603|CFAH_HUMAN	AQTTVTCMENGWSPTPR	Carbamidomethyl(C)@7; Oxidation(M)@8		1	P08603
sp|P08603|CFAH_HUMAN	AQTTVTCMENGWSPTPR	Carbamidomethyl(C)@7; Oxidation(M)@8		1	P08603
sp|P08603|CFAH_HUMAN	AQTTVTCMENGWSPTPR	Deamidated(Q)@2; Carbamidomethyl(C)@7		1	P08603
sp|P08603|CFAH_HUMAN	AQTTVTCMENGWSPTPR	Carbamidomethyl(C)@7		1	P08603
sp|P08603|CFAH_HUMAN	AQTTVTCMENGWSPTPR	Carbamidomethyl(C)@7; Deamidated(N)@10		1	P08603
sp|P08603|CFAH_HUMAN	AQTTVTCMENGWSPTPR	Carbamidomethyl(C)@7; Deamidated(N)@10		1	P08603
sp|P08603|CFAH_HUMAN	AQTTVTCMENGWSPTPR	Carbamidomethyl(C)@7		1	P08603
sp|P08603|CFAH_HUMAN	AQTTVTCMENGWSPTPR	Carbamidomethyl(C)@7; Deamidated(N)@10		1	P08603
sp|P08603|CFAH_HUMAN	AQTTVTCMENGWSPTPR	Carbamidomethyl(C)@7; Deamidated(N)@10		1	P08603
sp|P08603|CFAH_HUMAN	AQTTVTCMENGWSPTPR	Carbamidomethyl(C)@7; Deamidated(N)@10		1	P08603
sp|P08603|CFAH_HUMAN	AQTTVTCMENGWSPTPR	Deamidated(Q)@2; Carbamidomethyl(C)@7; Deamidated(N)@10		1	P08603
sp|P08603|CFAH_HUMAN	AQTTVTCMENGWSPTPR	Carbamidomethyl(C)@7; Deamidated(N)@10		1	P08603
sp|P08603|CFAH_HUMAN	AQTTVTCMENGWSPTPR	Carbamidomethyl(C)@7; Deamidated(N)@10		1	P08603
sp|P08603|CFAH_HUMAN	AQTTVTCMENGWSPTPR	Carbamidomethyl(C)@7; Deamidated(N)@10		1	P08603
sp|P08603|CFAH_HUMAN	AQTTVTCMENGWSPTPR	Carbamidomethyl(C)@7; Oxidation(M)@8; Deamidated(N)@10		1	P08603
sp|P08603|CFAH_HUMAN	AQTTVTCMENGWSPTPR	Carbamidomethyl(C)@7; Deamidated(N)@10		1	P08603
sp|P08603|CFAH_HUMAN	AQTTVTCMENGWSPTPR	Carbamidomethyl(C)@7; Deamidated(N)@10		1	P08603
sp|P08603|CFAH_HUMAN	AQTTVTCMENGWSPTPR	Carbamidomethyl(C)@7; Deamidated(N)@10		1	P08603
sp|P08603|CFAH_HUMAN	AQTTVTCMENGWSPTPR	Carbamidomethyl(C)@7; Deamidated(N)@10		1	P08603
sp|P08603|CFAH_HUMAN	AQTTVTCMENGWSPTPR	Carbamidomethyl(C)@7; Deamidated(N)@10		1	P08603
sp|P08603|CFAH_HUMAN	AQTTVTCMENGWSPTPR	Carbamidomethyl(C)@7; Deamidated(N)@10		1	P08603
sp|P08603|CFAH_HUMAN	AQTTVTCMENGWSPTPR	Carbamidomethyl(C)@7; Deamidated(N)@10		1	P08603
sp|P08603|CFAH_HUMAN	AQTTVTCMENGWSPTPR	Carbamidomethyl(C)@7; Deamidated(N)@10		1	P08603
sp|P08603|CFAH_HUMAN	AQTTVTCMENGWSPTPR	Carbamidomethyl(C)@7; Deamidated(N)@10		1	P08603
sp|P08603|CFAH_HUMAN	AQTTVTCMENGWSPTPR	Carbamidomethyl(C)@7; Deamidated(N)@10		1	P08603
sp|P08603|CFAH_HUMAN	AQTTVTCMENGWSPTPR	Carbamidomethyl(C)@7; Deamidated(N)@10		1	P08603
sp|P08603|CFAH_HUMAN	AQTTVTCMENGWSPTPR	Carbamidomethyl(C)@7; Deamidated(N)@10		1	P08603
sp|P08603|CFAH_HUMAN	AQTTVTCMENGWSPTPR	Carbamidomethyl(C)@7; Deamidated(N)@10		1	P08603
sp|P08603|CFAH_HUMAN	AQTTVTCMENGWSPTPR	Carbamidomethyl(C)@7; Deamidated(N)@10		1	P08603
sp|P08603|CFAH_HUMAN	AQTTVTCMENGWSPTPR	Carbamidomethyl(C)@7; Deamidated(N)@10		1	P08603
sp|P08603|CFAH_HUMAN	AQTTVTCMENGWSPTPR	Carbamidomethyl(C)@7; Deamidated(N)@10		1	P08603
sp|P08603|CFAH_HUMAN	AQTTVTCMENGWSPTPR	Carbamidomethyl(C)@7; Deamidated(N)@10		1	P08603
sp|P08603|CFAH_HUMAN	AQTTVTCMENGWSPTPR	Carbamidomethyl(C)@7; Deamidated(N)@10		1	P08603
sp|P08603|CFAH_HUMAN	AQTTVTCMENGWSPTPR	Carbamidomethyl(C)@7; Deamidated(N)@10		1	P08603
sp|P08603|CFAH_HUMAN	AQTTVTCMENGWSPTPR	Carbamidomethyl(C)@7; Deamidated(N)@10		1	P08603
sp|P08603|CFAH_HUMAN	AQTTVTCMENGWSPTPR	Carbamidomethyl(C)@7; Deamidated(N)@10		1	P08603
sp|P08603|CFAH_HUMAN	AQTTVTCMENGWSPTPR	Carbamidomethyl(C)@7; Deamidated(N)@10		1	P08603
sp|P08603|CFAH_HUMAN	AQTTVTCMENGWSPTPR	Carbamidomethyl(C)@7; Deamidated(N)@10		1	P08603
sp|P08603|CFAH_HUMAN	AQTTVTCMENGWSPTPR	Carbamidomethyl(C)@7; Deamidated(N)@10		1	P08603
sp|P08603|CFAH_HUMAN	AQTTVTCMENGWSPTPR	Carbamidomethyl(C)@7; Deamidated(N)@10		1	P08603
sp|P08603|CFAH_HUMAN	AQTTVTCMENGWSPTPR	Carbamidomethyl(C)@7; Deamidated(N)@10		1	P08603
sp|P08603|CFAH_HUMAN	AQTTVTCMENGWSPTPR	Carbamidomethyl(C)@7; Deamidated(N)@10		1	P08603
sp|P08603|CFAH_HUMAN	AQTTVTCMENGWSPTPR	Carbamidomethyl(C)@7; Deamidated(N)@10		1	P08603
sp|P08603|CFAH_HUMAN	AQTTVTCMENGWSPTPR	Carbamidomethyl(C)@7; Deamidated(N)@10		1	P08603
sp|P08603|CFAH_HUMAN	AQTTVTCMENGWSPTPR	Carbamidomethyl(C)@7; Deamidated(N)@10		1	P08603
sp|P08603|CFAH_HUMAN	AQTTVTCMENGWSPTPR	Carbamidomethyl(C)@7; Deamidated(N)@10		1	P08603
sp|P08603|CFAH_HUMAN	AQTTVTCMENGWSPTPR	Carbamidomethyl(C)@7; Deamidated(N)@10		1	P08603
sp|P08603|CFAH_HUMAN	AQTTVTCMENGWSPTPR	Carbamidomethyl(C)@7; Deamidated(N)@10		1	P08603
sp|P08603|CFAH_HUMAN	AQTTVTCMENGWSPTPR	Carbamidomethyl(C)@7; Deamidated(N)@10		1	P08603
sp|P08603|CFAH_HUMAN	AQTTVTCMENGWSPTPR	Carbamidomethyl(C)@7; Deamidated(N)@10		1	P08603
sp|P08603|CFAH_HUMAN	AQTTVTCMENGWSPTPR	Carbamidomethyl(C)@7; Oxidation(M)@8		1	P08603
sp|P08603|CFAH_HUMAN	AQTTVTCMENGWSPTPR	Carbamidomethyl(C)@7		1	P08603
sp|P08603|CFAH_HUMAN	AQTTVTCMENGWSPTPR	Carbamidomethyl(C)@7		1	P08603
sp|P08603|CFAH_HUMAN	AQTTVTCMENGWSPTPR	Carbamidomethyl(C)@7; Deamidated(N)@10		1	P08603
sp|P08603|CFAH_HUMAN	AQTTVTCMENGWSPTPR	Carbamidomethyl(C)@7		1	P08603
sp|P08603|CFAH_HUMAN	AQTTVTCMENGWSPTPR	Carbamidomethyl(C)@7		1	P08603
sp|P08603|CFAH_HUMAN	AQTTVTCMENGWSPTPR	Carbamidomethyl(C)@7; Deamidated(N)@10		1	P08603
sp|P08603|CFAH_HUMAN	AQTTVTCMENGWSPTPR	Carbamidomethyl(C)@7		1	P08603
sp|P08603|CFAH_HUMAN	AQTTVTCMENGWSPTPR	Carbamidomethyl(C)@7; Deamidated(N)@10		1	P08603
sp|P08603|CFAH_HUMAN	AQTTVTCMENGWSPTPR	Carbamidomethyl(C)@7		1	P08603
sp|P08603|CFAH_HUMAN	AQTTVTCMENGWSPTPR	Carbamidomethyl(C)@7; Oxidation(M)@8		1	P08603
sp|P08603|CFAH_HUMAN	AQTTVTCMENGWSPTPR	Carbamidomethyl(C)@7; Deamidated(N)@10		1	P08603
sp|P08603|CFAH_HUMAN	AQTTVTCMENGWSPTPR	Carbamidomethyl(C)@7; Deamidated(N)@10		1	P08603
sp|P08603|CFAH_HUMAN	AQTTVTCMENGWSPTPR	Carbamidomethyl(C)@7		1	P08603
sp|P08603|CFAH_HUMAN	AQTTVTCMENGWSPTPR	Carbamidomethyl@N-term; Carbamidomethyl(C)@7; Deamidated(N)@10		1	P08603
sp|P08603|CFAH_HUMAN	AQTTVTCMENGWSPTPR	Carbamidomethyl(C)@7; Oxidation(N)@10		1	P08603
sp|P08603|CFAH_HUMAN	AQTTVTCMENGWSPTPR	Carbamidomethyl(C)@7		1	P08603
sp|P08603|CFAH_HUMAN	AQTTVTCMENGWSPTPR	Carbamidomethyl(C)@7; Oxidation(M)@8		1	P08603
sp|P08603|CFAH_HUMAN	AQTTVTCMENGWSPTPR	Carbamidomethyl(C)@7		1	P08603
sp|P08603|CFAH_HUMAN	AQTTVTCMENGWSPTPR	Carbamidomethyl(C)@7; Oxidation(M)@8		1	P08603
sp|P08603|CFAH_HUMAN	AQTTVTCMENGWSPTPR	Carbamidomethyl@N-term; Carbamidomethyl(C)@7		1	P08603
sp|P08603|CFAH_HUMAN	AQTTVTCMENGWSPTPR	Carbamidomethyl(C)@7; Deamidated(N)@10		1	P08603
sp|P08603|CFAH_HUMAN	AQTTVTCMENGWSPTPR	Carbamidomethyl(C)@7; Deamidated(N)@10		1	P08603
sp|P08603|CFAH_HUMAN	AQTTVTCMENGWSPTPR	Carbamidomethyl(C)@7		1	P08603
sp|P08603|CFAH_HUMAN	AQTTVTCMENGWSPTPR	Deamidated(Q)@2; Carbamidomethyl(C)@7; Oxidation(M)@8		1	P08603
sp|P08603|CFAH_HUMAN	AQTTVTCMENGWSPTPR	Carbamidomethyl(C)@7; Deamidated(N)@10		1	P08603
sp|P08603|CFAH_HUMAN	AQTTVTCMENGWSPTPR	Carbamidomethyl(C)@7; Deamidated(N)@10		1	P08603
sp|P08603|CFAH_HUMAN	AQTTVTCMENGWSPTPR	Carbamidomethyl(C)@7; Oxidation(M)@8; Deamidated(N)@10		1	P08603
sp|P08603|CFAH_HUMAN	AQTTVTCMENGWSPTPR	Carbamidomethyl(C)@7; Oxidation(M)@8; Deamidated(N)@10		1	P08603
sp|P08603|CFAH_HUMAN	AQTTVTCMENGWSPTPR	Carbamidomethyl(C)@7; Deamidated(N)@10; Oxidation(W)@12		1	P08603
sp|P08603|CFAH_HUMAN	AQTTVTCMENGWSPTPR	Carbamidomethyl(C)@7; Deamidated(N)@10		1	P08603
sp|P08603|CFAH_HUMAN	AQTTVTCMENGWSPTPR	Carbamidomethyl(C)@7		1	P08603
sp|P08603|CFAH_HUMAN	AQTTVTCMENGWSPTPR	Carbamidomethyl@N-term; Carbamidomethyl(C)@7; Deamidated(N)@10		1	P08603
sp|P08603|CFAH_HUMAN	AQTTVTCMENGWSPTPR	Carbamidomethyl(C)@7		1	P08603
sp|P08603|CFAH_HUMAN	AQTTVTCMENGWSPTPR	Deamidated(Q)@2; Carbamidomethyl(C)@7; Deamidated(N)@10		1	P08603
sp|P08603|CFAH_HUMAN	AQTTVTCMENGWSPTPR	Deamidated(Q)@2; Carbamidomethyl(C)@7; Deamidated(N)@10		1	P08603
sp|P08603|CFAH_HUMAN	AQTTVTCMENGWSPTPR	Carbamidomethyl(C)@7; Oxidation(M)@8; Deamidated(N)@10		1	P08603
sp|P08603|CFAH_HUMAN	AQTTVTCMENGWSPTPR	Carbamidomethyl(C)@7; Oxidation(M)@8		1	P08603
sp|P08603|CFAH_HUMAN	AQTTVTCMENGWSPTPR	Carbamidomethyl(C)@7; Oxidation(M)@8		1	P08603
sp|P08603|CFAH_HUMAN	AQTTVTCMENGWSPTPR	Carbamidomethyl(C)@7		1	P08603
sp|P08603|CFAH_HUMAN	AQTTVTCMENGWSPTPR	Carbamidomethyl(T)@6; Carbamidomethyl(C)@7; Deamidated(N)@10		1	P08603
sp|P08603|CFAH_HUMAN	AQTTVTCMENGWSPTPR	Carbamidomethyl(C)@7; Oxidation(M)@8; Deamidated(N)@10		1	P08603
sp|P08603|CFAH_HUMAN	AQTTVTCMENGWSPTPR	Carbamidomethyl(C)@7; Oxidation(M)@8		1	P08603
sp|P08603|CFAH_HUMAN	AQTTVTCMENGWSPTPR	Carbamidomethyl(C)@7; Oxidation(M)@8		1	P08603
sp|P08603|CFAH_HUMAN	AQTTVTCMENGWSPTPR	Carbamidomethyl(C)@7; Oxidation(M)@8		1	P08603
sp|P08603|CFAH_HUMAN	AQTTVTCMENGWSPTPR	Carbamidomethyl(C)@7		1	P08603
sp|P08603|CFAH_HUMAN	AQTTVTCMENGWSPTPR	Carbamidomethyl(C)@7		1	P08603
sp|P08603|CFAH_HUMAN	AQTTVTCMENGWSPTPR	Carbamidomethyl(C)@7; Oxidation(M)@8		1	P08603
sp|P08603|CFAH_HUMAN	AQTTVTCMENGWSPTPR	Carbamidomethyl(C)@7; Cation:K(E)@9		1	P08603
sp|P08603|CFAH_HUMAN	AQTTVTCMENGWSPTPR	Carbamidomethyl@N-term; Carbamidomethyl(C)@7		1	P08603
sp|P08603|CFAH_HUMAN	AQTTVTCMENGWSPTPR	Carbamidomethyl(C)@7; Deamidated(N)@10		1	P08603
sp|P08603|CFAH_HUMAN	AQTTVTCMENGWSPTPR	Carbamidomethyl(C)@7; Oxidation(M)@8		1	P08603
sp|P08603|CFAH_HUMAN	AQTTVTCMENGWSPTPR	Carbamidomethyl(T)@6; Carbamidomethyl(C)@7		1	P08603
sp|P08603|CFAH_HUMAN	AQTTVTCMENGWSPTPR	Deamidated(Q)@2; Carbamidomethyl(C)@7; Deamidated(N)@10		1	P08603
sp|P08603|CFAH_HUMAN	AQTTVTCMENGWSPTPR	Deamidated(Q)@2; Carbamidomethyl(C)@7		1	P08603
sp|P08603|CFAH_HUMAN	AQTTVTCMENGWSPTPR	Carbamidomethyl@N-term; Carbamidomethyl(C)@7; Deamidated(N)@10		1	P08603
sp|P08603|CFAH_HUMAN	AQTTVTCMENGWSPTPR	Carbamidomethyl(T)@4; Carbamidomethyl(C)@7; Deamidated(N)@10		1	P08603
sp|P08603|CFAH_HUMAN	AQTTVTCMENGWSPTPR	Carbamidomethyl(T)@4; Carbamidomethyl(C)@7; Deamidated(N)@10		1	P08603
sp|P08603|CFAH_HUMAN	AQTTVTCMENGWSPTPR	Carbamidomethyl(T)@6; Carbamidomethyl(C)@7		1	P08603
sp|P08603|CFAH_HUMAN	AQTTVTCMENGWSPTPR	Carbamidomethyl(C)@7; Deamidated(N)@10		1	P08603
sp|P08603|CFAH_HUMAN	AQTTVTCMENGWSPTPR	Carbamidomethyl(T)@6; Carbamidomethyl(C)@7		1	P08603
sp|P08603|CFAH_HUMAN	AQTTVTCMENGWSPTPR	Carbamidomethyl(T)@6; Carbamidomethyl(C)@7		1	P08603
sp|P08603|CFAH_HUMAN	AQTTVTCMENGWSPTPR	Carbamidomethyl(T)@6; Carbamidomethyl(C)@7		1	P08603
sp|P08603|CFAH_HUMAN	AQTTVTCMENGWSPTPR	Carbamidomethyl(T)@6; Carbamidomethyl(C)@7		1	P08603
sp|P08603|CFAH_HUMAN	AQTTVTCMENGWSPTPR	Carbamidomethyl(C)@7; Cation:K(E)@9		1	P08603
sp|P08603|CFAH_HUMAN	AQTTVTCMENGWSPTPR	Carbamidomethyl(T)@6; Carbamidomethyl(C)@7		1	P08603
sp|P08603|CFAH_HUMAN	AQTTVTCMENGWSPTPR	Carbamidomethyl(T)@6; Carbamidomethyl(C)@7		1	P08603
sp|P08603|CFAH_HUMAN	AQTTVTCMENGWSPTPR	Carbamidomethyl(C)@7; Carbamidomethyl(E)@9; Deamidated(N)@10		1	P08603
sp|P08603|CFAH_HUMAN	AQTTVTCMENGWSPTPR	Carbamidomethyl(C)@7; Oxidation(M)@8		1	P08603
sp|P08603|CFAH_HUMAN	AQTTVTCMENGWSPTPR	Carbamidomethyl(C)@7; Deamidated(N)@10		1	P08603
sp|P08603|CFAH_HUMAN	AQTTVTCMENGWSPTPR	Carbamidomethyl@N-term; Carbamidomethyl(C)@7; Deamidated(N)@10		1	P08603
sp|P08603|CFAH_HUMAN	AVYTCNEGYQLLGEINYR	Carbamidomethyl(C)@5		1	P08603
sp|P08603|CFAH_HUMAN	AVYTCNEGYQLLGEINYR	Carbamidomethyl(C)@5		1	P08603
sp|P08603|CFAH_HUMAN	AVYTCNEGYQLLGEINYR	Carbamidomethyl(C)@5		1	P08603
sp|P08603|CFAH_HUMAN	AVYTCNEGYQLLGEINYR	Carbamidomethyl(C)@5		1	P08603
sp|P08603|CFAH_HUMAN	AVYTCNEGYQLLGEINYR	Carbamidomethyl(C)@5		1	P08603
sp|P08603|CFAH_HUMAN	AVYTCNEGYQLLGEINYR	Carbamidomethyl(C)@5		1	P08603
sp|P08603|CFAH_HUMAN	AVYTCNEGYQLLGEINYR	Carbamidomethyl(C)@5		1	P08603
sp|P08603|CFAH_HUMAN	CDIPVFMNAR	Carbamidomethyl(C)@1	cleaved S-C@N-term	1	P08603
sp|P08603|CFAH_HUMAN	CFEGFGIDGPAIAK	Carbamidomethyl(C)@1; Carbamidomethyl(K)@14		1	P08603
sp|P08603|CFAH_HUMAN	CFEGFGIDGPAIAK	Carbamidomethyl(C)@1		1	P08603
sp|P08603|CFAH_HUMAN	CFEGFGIDGPAIAK	Carbamidomethyl(C)@1		1	P08603
sp|P08603|CFAH_HUMAN	CFEGFGIDGPAIAK	Carbamidomethyl(C)@1		1	P08603
sp|P08603|CFAH_HUMAN	CFEGFGIDGPAIAK	Carbamidomethyl(C)@1		1	P08603
sp|P08603|CFAH_HUMAN	CFEGFGIDGPAIAK	Carbamidomethyl(C)@1		1	P08603
sp|P08603|CFAH_HUMAN	CFEGFGIDGPAIAK	Carbamidomethyl(C)@1		1	P08603
sp|P08603|CFAH_HUMAN	CFEGFGIDGPAIAK	Carbamidomethyl(C)@1		1	P08603
sp|P08603|CFAH_HUMAN	CFEGFGIDGPAIAK	Carbamidomethyl(C)@1		1	P08603
sp|P08603|CFAH_HUMAN	CFEGFGIDGPAIAK	Carbamidomethyl(C)@1		1	P08603
sp|P08603|CFAH_HUMAN	CFEGFGIDGPAIAK	Carbamidomethyl(C)@1		1	P08603
sp|P08603|CFAH_HUMAN	CFEGFGIDGPAIAK	Carbamidomethyl(C)@1		1	P08603
sp|P08603|CFAH_HUMAN	CFEGFGIDGPAIAK	Carbamidomethyl(C)@1		1	P08603
sp|P08603|CFAH_HUMAN	CFEGFGIDGPAIAK	Carbamidomethyl(C)@1		1	P08603
sp|P08603|CFAH_HUMAN	CFEGFGIDGPAIAK	Carbamidomethyl(C)@1		1	P08603
sp|P08603|CFAH_HUMAN	CFEGFGIDGPAIAK	Carbamidomethyl(C)@1		1	P08603
sp|P08603|CFAH_HUMAN	CFEGFGIDGPAIAK	Carbamidomethyl(C)@1		1	P08603
sp|P08603|CFAH_HUMAN	CFEGFGIDGPAIAK	Carbamidomethyl(C)@1		1	P08603
sp|P08603|CFAH_HUMAN	CFEGFGIDGPAIAK	Carbamidomethyl(C)@1		1	P08603
sp|P08603|CFAH_HUMAN	CFEGFGIDGPAIAK	Carbamidomethyl(C)@1		1	P08603
sp|P08603|CFAH_HUMAN	CFEGFGIDGPAIAK	Carbamidomethyl(C)@1		1	P08603
sp|P08603|CFAH_HUMAN	CFEGFGIDGPAIAK	Carbamidomethyl(C)@1		1	P08603
sp|P08603|CFAH_HUMAN	CFEGFGIDGPAIAK	Carbamidomethyl(C)@1		1	P08603
sp|P08603|CFAH_HUMAN	CFEGFGIDGPAIAK	Carbamidomethyl(C)@1		1	P08603
sp|P08603|CFAH_HUMAN	CFEGFGIDGPAIAK	Carbamidomethyl(C)@1		1	P08603
sp|P08603|CFAH_HUMAN	CFEGFGIDGPAIAK	Carbamidomethyl(C)@1		1	P08603
sp|P08603|CFAH_HUMAN	CFEGFGIDGPAIAK	Carbamidomethyl(C)@1		1	P08603
sp|P08603|CFAH_HUMAN	CFEGFGIDGPAIAK	Carbamidomethyl(C)@1		1	P08603
sp|P08603|CFAH_HUMAN	CFEGFGIDGPAIAK	Carbamidomethyl(C)@1		1	P08603
sp|P08603|CFAH_HUMAN	CFEGFGIDGPAIAK	Carbamidomethyl(C)@1		1	P08603
sp|P08603|CFAH_HUMAN	CFEGFGIDGPAIAK	Carbamidomethyl(C)@1		1	P08603
sp|P08603|CFAH_HUMAN	CFEGFGIDGPAIAK	Carbamidomethyl(C)@1		1	P08603
sp|P08603|CFAH_HUMAN	CFEGFGIDGPAIAK	Carbamidomethyl(C)@1		1	P08603
sp|P08603|CFAH_HUMAN	CFEGFGIDGPAIAK	Carbamidomethyl(C)@1		1	P08603
sp|P08603|CFAH_HUMAN	CFEGFGIDGPAIAK	Carbamidomethyl(C)@1		1	P08603
sp|P08603|CFAH_HUMAN	CFEGFGIDGPAIAK	Carbamidomethyl(C)@1		1	P08603
sp|P08603|CFAH_HUMAN	CFEGFGIDGPAIAK	Carbamidomethyl(C)@1		1	P08603
sp|P08603|CFAH_HUMAN	CFEGFGIDGPAIAK	Carbamidomethyl(C)@1		1	P08603
sp|P08603|CFAH_HUMAN	CFEGFGIDGPAIAK	Carbamidomethyl(C)@1		1	P08603
sp|P08603|CFAH_HUMAN	CFEGFGIDGPAIAK	Carbamidomethyl(C)@1		1	P08603
sp|P08603|CFAH_HUMAN	CFEGFGIDGPAIAK	Carbamidomethyl(C)@1		1	P08603
sp|P08603|CFAH_HUMAN	CFEGFGIDGPAIAK	Carbamidomethyl(C)@1		1	P08603
sp|P08603|CFAH_HUMAN	CFEGFGIDGPAIAK	Carbamidomethyl(C)@1		1	P08603
sp|P08603|CFAH_HUMAN	CFEGFGIDGPAIAK	Carbamidomethyl(C)@1		1	P08603
sp|P08603|CFAH_HUMAN	CFEGFGIDGPAIAK	Carbamidomethyl(C)@1		1	P08603
sp|P08603|CFAH_HUMAN	CFEGFGIDGPAIAK	Carbamidomethyl(C)@1		1	P08603
sp|P08603|CFAH_HUMAN	CFEGFGIDGPAIAK	Carbamidomethyl(C)@1		1	P08603
sp|P08603|CFAH_HUMAN	CFEGFGIDGPAIAK	Carbamidomethyl(C)@1		1	P08603
sp|P08603|CFAH_HUMAN	CFEGFGIDGPAIAK	Carbamidomethyl(C)@1		1	P08603
sp|P08603|CFAH_HUMAN	CFEGFGIDGPAIAK	Carbamidomethyl(C)@1		1	P08603
sp|P08603|CFAH_HUMAN	CFEGFGIDGPAIAK	Carbamidomethyl(C)@1		1	P08603
sp|P08603|CFAH_HUMAN	CFEGFGIDGPAIAK	Carbamidomethyl(C)@1		1	P08603
sp|P08603|CFAH_HUMAN	CFEGFGIDGPAIAK	Carbamidomethyl(C)@1		1	P08603
sp|P08603|CFAH_HUMAN	CFEGFGIDGPAIAK	Carbamidomethyl(C)@1		1	P08603
sp|P08603|CFAH_HUMAN	CFEGFGIDGPAIAK	Carbamidomethyl(C)@1		1	P08603
sp|P08603|CFAH_HUMAN	CFEGFGIDGPAIAK	Carbamidomethyl(C)@1		1	P08603
sp|P08603|CFAH_HUMAN	CFEGFGIDGPAIAK	Carbamidomethyl(C)@1		1	P08603
sp|P08603|CFAH_HUMAN	CFEGFGIDGPAIAK	Carbamidomethyl(C)@1		1	P08603
sp|P08603|CFAH_HUMAN	CFEGFGIDGPAIAK	Carbamidomethyl(C)@1		1	P08603
sp|P08603|CFAH_HUMAN	CFEGFGIDGPAIAK	Carbamidomethyl(C)@1		1	P08603
sp|P08603|CFAH_HUMAN	CFEGFGIDGPAIAK	Carbamidomethyl(C)@1; Oxidation(F)@2		1	P08603
sp|P08603|CFAH_HUMAN	CFEGFGIDGPAIAK	Carbamidomethyl(C)@1; Oxidation(F)@2		1	P08603
sp|P08603|CFAH_HUMAN	CFEGFGIDGPAIAK	Carbamidomethyl(C)@1; Cation:K(D)@8		1	P08603
sp|P08603|CFAH_HUMAN	CFEGFGIDGPAIAK	Carbamidomethyl(C)@1; Cation:K(D)@8		1	P08603
sp|P08603|CFAH_HUMAN	CFEGFGIDGPAIAK	Carbamidomethyl(C)@1		1	P08603
sp|P08603|CFAH_HUMAN	CFEGFGIDGPAIAK	Carbamidomethyl(C)@1; Cation:K(E)@3		1	P08603
sp|P08603|CFAH_HUMAN	CFEGFGIDGPAIAK	Carbamidomethyl(C)@1; Cation:K(D)@8		1	P08603
sp|P08603|CFAH_HUMAN	CFEGFGIDGPAIAK	Carbamidomethyl(C)@1; Cation:K(D)@8		1	P08603
sp|P08603|CFAH_HUMAN	CFEGFGIDGPAIAK	Carbamidomethyl(C)@1; Cation:K(D)@8		1	P08603
sp|P08603|CFAH_HUMAN	CFEGFGIDGPAIAK	Carbamidomethyl(C)@1; Cation:K(D)@8		1	P08603
sp|P08603|CFAH_HUMAN	CFEGFGIDGPAIAK	Carbamidomethyl(C)@1; Oxidation(F)@2		1	P08603
sp|P08603|CFAH_HUMAN	CFEGFGIDGPAIAK	Carbamidomethyl(C)@1		1	P08603
sp|P08603|CFAH_HUMAN	CFEGFGIDGPAIAK	Carbamidomethyl(C)@1; Oxidation(F)@2		1	P08603
sp|P08603|CFAH_HUMAN	CFEGFGIDGPAIAK	Carbamidomethyl(C)@1		1	P08603
sp|P08603|CFAH_HUMAN	CFEGFGIDGPAIAK	Carbamidomethyl(C)@1		1	P08603
sp|P08603|CFAH_HUMAN	CFEGFGIDGPAIAK	Carbamidomethyl(C)@1		1	P08603
sp|P08603|CFAH_HUMAN	CFEGFGIDGPAIAK	Carbamidomethyl(C)@1		1	P08603
sp|P08603|CFAH_HUMAN	CFEGFGIDGPAIAK	Carbamidomethyl(C)@1		1	P08603
sp|P08603|CFAH_HUMAN	CFEGFGIDGPAIAK	Carbamidomethyl(C)@1		1	P08603
sp|P08603|CFAH_HUMAN	CFEGFGIDGPAIAK	Carbamidomethyl(C)@1		1	P08603
sp|P08603|CFAH_HUMAN	CFEGFGIDGPAIAK	Carbamidomethyl(C)@1		1	P08603
sp|P08603|CFAH_HUMAN	CFEGFGIDGPAIAK	Carbamidomethyl(C)@1		1	P08603
sp|P08603|CFAH_HUMAN	CFEGFGIDGPAIAK	Carbamidomethyl(C)@1		1	P08603
[truncated: 88,744 more rows]

## Sheet: SCX
Accessions	Sequence	Modifications	Cleavages	Uniqueness	Matching PMIDs
[truncated: 5,035 more rows]
