# Supplementary material for: Potential early clinical stage colorectal cancer diagnosis using a proteomics blood test panel
Source: Clin Proteomics. 2019 Aug 28;16:34. doi: 10.1186/s12014-019-9255-z (PMC6712843; doi:10.1186/s12014-019-9255-z)
Supplement: Supplementary file 3 — Additional file 3: Table S2. Plasma protein concentration, subcellular location and tissue specificity. [file 12014_2019_9255_MOESM3_ESM.xlsx]

## Sheet: Sheet0
PMID	Protein name	Protein description	Average concentration (pg/ml)	Log 10 (Average concentration)	Subcellular location	Tissue specificity
P02768	ALBU_HUMAN	Serum albumin	4.06073e+10	10.6086	Secreted.	Plasma.
P55056	APOC4_HUMAN	Apolipoprotein C-IV (Apo-CIV) (ApoC-IV) (Apolipoprotein C4)	4600000000	9.66276	Secreted.	Expressed by the liver and secreted in plasma.
P02787	TRFE_HUMAN	Serotransferrin (Transferrin) (Beta-1 metal-binding globulin) (Siderophilin)	3.6325e+09	9.56021	Secreted.	Expressed by the liver and secreted in plasma.
P02671	FIBA_HUMAN	Fibrinogen alpha chain [Cleaved into: Fibrinopeptide A; Fibrinogen alpha chain]	2.1196e+09	9.32625	Secreted	Detected in blood plasma (at protein level).
P01023	A2MG_HUMAN	Alpha-2-macroglobulin (Alpha-2-M) (C3 and PZP-like alpha-2-macroglobulin domain-containing protein 5)	1.58445e+09	9.19988	Secreted	Secreted in plasma.
P01009	A1AT_HUMAN	Alpha-1-antitrypsin (Alpha-1 protease inhibitor) (Alpha-1-antiproteinase) (Serpin A1) [Cleaved into: Short peptide from AAT (SPAAT)]	1.56214e+09	9.19372	Secreted. Endoplasmic reticulum. Note=The S and Z allele are not secreted effectively and accumulate intracellularly in the endoplasmic reticulum.; Short peptide from AAT: Secreted, extracellular space, extracellular matrix.	Ubiquitous. Expressed in leukocytes and plasma.
P00738	HPT_HUMAN	Haptoglobin (Zonulin) [Cleaved into: Haptoglobin alpha chain; Haptoglobin beta chain]	1.41833e+09	9.15178	Secreted.	Expressed by the liver and secreted in plasma.
P02647	APOA1_HUMAN	Apolipoprotein A-I (Apo-AI) (ApoA-I) (Apolipoprotein A1) [Cleaved into: Proapolipoprotein A-I (ProapoA-I); Truncated apolipoprotein A-I (Apolipoprotein A-I(1-242))]	1.24208e+09	9.09415	Secreted.	Major protein of plasma HDL, also found in chylomicrons. Synthesized in the liver and small intestine. The oxidized form at Met-110 and Met-136 is increased in individuals with increased risk for coronary artery disease, such as in carrier of the eNOSa/b genotype and exposure to cigarette smoking. It is also present in increased levels in aortic lesions relative to native ApoA-I and increased lev…
P01024	CO3_HUMAN	Complement C3 (C3 and PZP-like alpha-2-macroglobulin domain-containing protein 1) [Cleaved into: Complement C3 beta chain; C3-beta-c (C3bc); Complement C3 alpha chain; C3a anaphylatoxin; Acylation stimulating protein (ASP) (C3adesArg); Complement C3b alpha' chain; Complement C3c alpha' chain fragment 1; Complement C3dg fragment; Complement C3g fragment; Complement C3d fragment; Complement C3f fra…	1.18983e+09	9.07549	Secreted.	Plasma. The acylation stimulating protein (ASP) is expressed in adipocytes and released into the plasma during both the fasting and postprandial periods.
P02763	A1AG1_HUMAN	Alpha-1-acid glycoprotein 1 (AGP 1) (Orosomucoid-1) (OMD 1)	581300000	8.7644	Secreted.	Expressed by the liver and secreted in plasma.
P04114	APOB_HUMAN	Apolipoprotein B-100 (Apo B-100) [Cleaved into: Apolipoprotein B-48 (Apo B-48)]	563369875	8.75079	Cytoplasm Secreted
P02790	HEMO_HUMAN	Hemopexin (Beta-1B-glycoprotein)	516619000	8.71317	Secreted.	Expressed by the liver and secreted in plasma.
P02765	FETUA_HUMAN	Alpha-2-HS-glycoprotein (Alpha-2-Z-globulin) (Ba-alpha-2-glycoprotein) (Fetuin-A) [Cleaved into: Alpha-2-HS-glycoprotein chain A; Alpha-2-HS-glycoprotein chain B]	4.57833e+08	8.66071	Secreted.	Synthesized in liver and selectively concentrated in bone matrix. Secreted in plasma. It is also found in dentin in much higher quantities than other plasma proteins.
P02675	FIBB_HUMAN	Fibrinogen beta chain [Cleaved into: Fibrinopeptide B; Fibrinogen beta chain]	3.49333e+08	8.54324	Secreted	Detected in blood plasma (at protein level).
P02679	FIBG_HUMAN	Fibrinogen gamma chain	3.48543e+08	8.54226	Secreted	Detected in blood plasma (at protein level).
P06396	GELS_HUMAN	Gelsolin (AGEL) (Actin-depolymerizing factor) (ADF) (Brevin)	3.44333e+08	8.53698	Isoform 2: Cytoplasm, cytoskeleton.; Isoform 1: Secreted.	Phagocytic cells, platelets, fibroblasts, nonmuscle cells, smooth and skeletal muscle cells.
P02766	TTHY_HUMAN	Transthyretin (ATTR) (Prealbumin) (TBPA)	3.24414e+08	8.5111	Secreted. Cytoplasm.	Detected in serum and cerebrospinal fluid (at protein level). Highly expressed in choroid plexus epithelial cells. Detected in retina pigment epithelium and liver.
P02652	APOA2_HUMAN	Apolipoprotein A-II (Apo-AII) (ApoA-II) (Apolipoprotein A2) [Cleaved into: Proapolipoprotein A-II (ProapoA-II); Truncated apolipoprotein A-II (Apolipoprotein A-II(1-76))]	3.23675e+08	8.51011	Secreted	Plasma; synthesized in the liver and intestine.
P01861	IGHG4_HUMAN	Immunoglobulin heavy constant gamma 4 (Ig gamma-4 chain C region)	320000000	8.50515	Secreted Cell membrane
P0C0L4	CO4A_HUMAN	Complement C4-A (Acidic complement C4) (C3 and PZP-like alpha-2-macroglobulin domain-containing protein 2) [Cleaved into: Complement C4 beta chain; Complement C4-A alpha chain; C4a anaphylatoxin; C4b-A; C4d-A; Complement C4 gamma chain]	2.73333e+08	8.43669	Secreted. Cell junction, synapse Cell projection, axon Cell projection, dendrite	Complement component C4 is expressed at highest levels in the liver, at moderate levels in the adrenal cortex, adrenal medulla, thyroid gland,and the kidney, and at lowest levels in the heart, ovary, small intestine, thymus, pancreas and spleen. The extra-hepatic sites of expression may be important for the local protection and inflammatory response.
P08603	CFAH_HUMAN	Complement factor H (H factor 1)	270950000	8.43289	Secreted.	CFH is one of the most abundant complement components in blood where the liver is the major source of CFH protein in vivo. in addition, CFH is secreted by additional cell types including monocytes, fibroblasts, or endothelial cells.
P00450	CERU_HUMAN	Ceruloplasmin (EC 1.16.3.1) (Ferroxidase)	2.619e+08	8.41814	Secreted. Note=Colocalizes with GCP1 in secretory intracellular compartments.	Expressed by the liver and secreted in plasma.
P02774	VTDB_HUMAN	Vitamin D-binding protein (DBP) (VDB) (Gc protein-derived macrophage activating factor) (Gc-MAF) (GcMAF) (Gc-globulin) (Group-specific component) (Gc) (Vitamin D-binding protein-macrophage activating factor) (DBP-maf)	255872000	8.40802	Secreted	Expressed in the liver. Found in plasma, ascites, cerebrospinal fluid and urine.
P01011	AACT_HUMAN	Alpha-1-antichymotrypsin (ACT) (Cell growth-inhibiting gene 24/25 protein) (Serpin A3) [Cleaved into: Alpha-1-antichymotrypsin His-Pro-less]	249000000	8.3962	Secreted.	Plasma. Synthesized in the liver. Like the related alpha-1-antitrypsin, its concentration increases in the acute phase of inflammation or infection. Found in the amyloid plaques from the hippocampus of Alzheimer disease brains.
P00751	CFAB_HUMAN	Complement factor B (EC 3.4.21.47) (C3/C5 convertase) (Glycine-rich beta glycoprotein) (GBG) (PBF2) (Properdin factor B) [Cleaved into: Complement factor B Ba fragment; Complement factor B Bb fragment]	2.33333e+08	8.36798	Secreted.
P01042	KNG1_HUMAN	Kininogen-1 (Alpha-2-thiol proteinase inhibitor) (Fitzgerald factor) (High molecular weight kininogen) (HMWK) (Williams-Fitzgerald-Flaujeac factor) [Cleaved into: Kininogen-1 heavy chain; T-kinin (Ile-Ser-Bradykinin); Bradykinin (Kallidin I); Lysyl-bradykinin (Kallidin II); Kininogen-1 light chain; Low molecular weight growth-promoting factor]	210750000	8.32377	Secreted, extracellular space.	Secreted in plasma. T-kinin is detected in malignant ovarian, colon and breast carcinomas, but not in benign tumors.
P05155	IC1_HUMAN	Plasma protease C1 inhibitor (C1 Inh) (C1Inh) (C1 esterase inhibitor) (C1-inhibiting factor) (Serpin G1)	204000000	8.30963	Secreted.
P04004	VTNC_HUMAN	Vitronectin (VN) (S-protein) (Serum-spreading factor) (V75) [Cleaved into: Vitronectin V65 subunit; Vitronectin V10 subunit; Somatomedin-B]	1.91362e+08	8.28186	Secreted, extracellular space.	Plasma.
P02753	RET4_HUMAN	Retinol-binding protein 4 (Plasma retinol-binding protein) (PRBP) (RBP) [Cleaved into: Plasma retinol-binding protein(1-182); Plasma retinol-binding protein(1-181); Plasma retinol-binding protein(1-179); Plasma retinol-binding protein(1-176)]	180500000	8.25648	Secreted	Detected in blood plasma and in urine (at protein level).
P01871	IGHM_HUMAN	Immunoglobulin heavy constant mu (Ig mu chain C region) (Ig mu chain C region BOT) (Ig mu chain C region GAL) (Ig mu chain C region OU)	169000000	8.22789	Isoform 1: Secreted. Note=During differentiation, B-lymphocytes switch from expression of membrane-bound IgM to secretion of IgM.; Isoform 2: Cell membrane; Single-pass type I membrane protein.
P04217	A1BG_HUMAN	Alpha-1B-glycoprotein (Alpha-1-B glycoprotein)	159450000	8.20262	Secreted.	Plasma.
P01008	ANT3_HUMAN	Antithrombin-III (ATIII) (Serpin C1)	1.43521e+08	8.15691	Secreted, extracellular space.	Found in plasma.
P02751	FINC_HUMAN	Fibronectin (FN) (Cold-insoluble globulin) (CIG) [Cleaved into: Anastellin; Ugl-Y1; Ugl-Y2; Ugl-Y3]	1.40233e+08	8.14685	Secreted, extracellular space, extracellular matrix	Plasma FN (soluble dimeric form) is secreted by hepatocytes. Cellular FN (dimeric or cross-linked multimeric forms), made by fibroblasts, epithelial and other cell types, is deposited as fibrils in the extracellular matrix. Ugl-Y1, Ugl-Y2 and Ugl-Y3 are found in urine.
P02656	APOC3_HUMAN	Apolipoprotein C-III (Apo-CIII) (ApoC-III) (Apolipoprotein C3)	1.29667e+08	8.11283	Secreted	Liver.
P10909	CLUS_HUMAN	Clusterin (Aging-associated gene 4 protein) (Apolipoprotein J) (Apo-J) (Complement cytolysis inhibitor) (CLI) (Complement-associated protein SP-40,40) (Ku70-binding protein 1) (NA1/NA2) (Testosterone-repressed prostate message 2) (TRPM-2) [Cleaved into: Clusterin beta chain (ApoJalpha) (Complement cytolysis inhibitor a chain); Clusterin alpha chain (ApoJbeta) (Complement cytolysis inhibitor b cha…	1.25409e+08	8.09833	Isoform 1: Secreted. Note=Can retrotranslocate from the secretory compartments to the cytosol upon cellular stress.; Nucleus. Cytoplasm. Mitochondrion membrane; Peripheral membrane protein; Cytoplasmic side. Cytoplasm, cytosol. Microsome. Endoplasmic reticulum. Cytoplasmic vesicle, secretory vesicle, chromaffin granule Note=Isoforms lacking the N-terminal signal sequence have been shown to be cyt…	Detected in blood plasma, cerebrospinal fluid, milk, seminal plasma and colon mucosa. Detected in the germinal center of colon lymphoid nodules and in colon parasympathetic ganglia of the Auerbach plexus (at protein level). Ubiquitous. Detected in brain, testis, ovary, liver and pancreas, and at lower levels in kidney, heart, spleen and lung.
P43652	AFAM_HUMAN	Afamin (Alpha-albumin) (Alpha-Alb)	1.23697e+08	8.09236	Secreted	High level detected in plasma but also in extravascular fluids such as follicular and cerebrospinal fluids (at protein level).
P02749	APOH_HUMAN	Beta-2-glycoprotein 1 (APC inhibitor) (Activated protein C-binding protein) (Anticardiolipin cofactor) (Apolipoprotein H) (Apo-H) (Beta-2-glycoprotein I) (B2GPI) (Beta(2)GPI)	112120800	8.04969	Secreted.	Expressed by the liver and secreted in plasma.
P0C0L5	CO4B_HUMAN	Complement C4-B (Basic complement C4) (C3 and PZP-like alpha-2-macroglobulin domain-containing protein 3) [Cleaved into: Complement C4 beta chain; Complement C4-B alpha chain; C4a anaphylatoxin; C4b-B; C4d-B; Complement C4 gamma chain]	97000000	7.98677	Secreted. Cell junction, synapse Cell projection, axon Cell projection, dendrite	Complement component C4 is expressed at highest levels in the liver, at moderate levels in the adrenal cortex, adrenal medulla, thyroid gland,and the kidney, and at lowest levels in the heart, ovary, small intestine, thymus, pancreas and spleen. The extra-hepatic sites of expression may be important for the local protection and inflammatory response.
P00747	PLMN_HUMAN	Plasminogen (EC 3.4.21.7) [Cleaved into: Plasmin heavy chain A; Activation peptide; Angiostatin; Plasmin heavy chain A, short form; Plasmin light chain B]	9.43818e+07	7.97489	Secreted Note=Locates to the cell surface where it is proteolytically cleaved to produce the active plasmin. Interaction with HRG tethers it to the cell surface.	Present in plasma and many other extracellular fluids. It is synthesized in the liver.
P00734	THRB_HUMAN	Prothrombin (EC 3.4.21.5) (Coagulation factor II) [Cleaved into: Activation peptide fragment 1; Activation peptide fragment 2; Thrombin light chain; Thrombin heavy chain]	93926250	7.97279	Secreted, extracellular space.	Expressed by the liver and secreted in plasma.
P04196	HRG_HUMAN	Histidine-rich glycoprotein (Histidine-proline-rich glycoprotein) (HPRG)	9.18667e+07	7.96316	Secreted	Expressed in macrophages and in malignant cells. Expressed by the liver and secreted in plasma (at protein level).
P06727	APOA4_HUMAN	Apolipoprotein A-IV (Apo-AIV) (ApoA-IV) (Apolipoprotein A4)	90708000	7.95765	Secreted.	Synthesized primarily in the intestine and secreted in plasma.
P01031	CO5_HUMAN	Complement C5 (C3 and PZP-like alpha-2-macroglobulin domain-containing protein 4) [Cleaved into: Complement C5 beta chain; Complement C5 alpha chain; C5a anaphylatoxin; Complement C5 alpha' chain]	90000000	7.95424	Secreted.
P05090	APOD_HUMAN	Apolipoprotein D (Apo-D) (ApoD)	82000000	7.91381	Secreted.	Expressed in liver, intestine, pancreas, kidney, placenta, adrenal, spleen, fetal brain tissue and tears.
P25311	ZA2G_HUMAN	Zinc-alpha-2-glycoprotein (Zn-alpha-2-GP) (Zn-alpha-2-glycoprotein)	73504200	7.86631	Secreted.	Blood plasma, seminal plasma, urine, saliva, sweat, epithelial cells of various human glands, liver.
P02655	APOC2_HUMAN	Apolipoprotein C-II (Apo-CII) (ApoC-II) (Apolipoprotein C2) [Cleaved into: Proapolipoprotein C-II (ProapoC-II)]	67500000	7.8293	Secreted	Liver and intestine.
P08697	A2AP_HUMAN	Alpha-2-antiplasmin (Alpha-2-AP) (Alpha-2-plasmin inhibitor) (Alpha-2-PI) (Serpin F2)	5.98518e+07	7.77708	Secreted.	Expressed by the liver and secreted in plasma.
P36980	FHR2_HUMAN	Complement factor H-related protein 2 (FHR-2) (DDESK59) (H factor-like 3) (H factor-like protein 2)	57000000	7.75587	Secreted.	Expressed by the liver and secreted in plasma.
Q03591	FHR1_HUMAN	Complement factor H-related protein 1 (FHR-1) (H factor-like protein 1) (H-factor-like 1) (H36)	57000000	7.75587	Secreted.	Expressed by the liver and secreted in plasma.
P00736	C1R_HUMAN	Complement C1r subcomponent (EC 3.4.21.41) (Complement component 1 subcomponent r) [Cleaved into: Complement C1r subcomponent heavy chain; Complement C1r subcomponent light chain]	56860000	7.75481	Secreted
P05546	HEP2_HUMAN	Heparin cofactor 2 (Heparin cofactor II) (HC-II) (Protease inhibitor leuserpin-2) (HLS2) (Serpin D1)	53382000	7.72739		Expressed predominantly in liver. Also present in plasma.
P08185	CBG_HUMAN	Corticosteroid-binding globulin (CBG) (Serpin A6) (Transcortin)	4.70667e+07	7.67271	Secreted.	Plasma; synthesized in liver. Has also been identified in a number of glycocorticoid responsive cells.
P10643	CO7_HUMAN	Complement component C7	46920000	7.67136	Secreted.
P27169	PON1_HUMAN	Serum paraoxonase/arylesterase 1 (PON 1) (EC 3.1.1.2) (EC 3.1.1.81) (EC 3.1.8.1) (Aromatic esterase 1) (A-esterase 1) (K-45) (Serum aryldialkylphosphatase 1)	46175000	7.66441	Secreted, extracellular space.	Plasma, associated with HDL (at protein level). Expressed in liver, but not in heart, brain, placenta, lung, skeletal muscle, kidney or pancreas.
Q14624	ITIH4_HUMAN	Inter-alpha-trypsin inhibitor heavy chain H4 (ITI heavy chain H4) (ITI-HC4) (Inter-alpha-inhibitor heavy chain 4) (Inter-alpha-trypsin inhibitor family heavy chain-related protein) (IHRP) (Plasma kallikrein sensitive glycoprotein 120) (Gp120) (PK-120) [Cleaved into: 70 kDa inter-alpha-trypsin inhibitor heavy chain H4; 35 kDa inter-alpha-trypsin inhibitor heavy chain H4]	42000000	7.62325	Secreted.	Liver specific.
P07357	CO8A_HUMAN	Complement component C8 alpha chain (Complement component 8 subunit alpha)	41200000	7.6149	Secreted. Cell membrane; Multi-pass membrane protein. Note=Secreted as soluble protein. Inserts into the cell membrane of target cells.
P69905	HBA_HUMAN	Hemoglobin subunit alpha (Alpha-globin) (Hemoglobin alpha chain)	41000000	7.61278		Red blood cells.
P02748	CO9_HUMAN	Complement component C9 [Cleaved into: Complement component C9a; Complement component C9b]	39826000	7.60017	Secreted Target cell membrane ; Multi-pass membrane protein Note=Secreted as soluble monomer. Oligomerizes at target membranes, forming a pre-pore. A conformation change then leads to the formation of a 100 Angstrom diameter pore.	Plasma (at protein level).
P02760	AMBP_HUMAN	Protein AMBP [Cleaved into: Alpha-1-microglobulin (Protein HC) (Alpha-1 microglycoprotein) (Complex-forming glycoprotein heterogeneous in charge); Inter-alpha-trypsin inhibitor light chain (ITI-LC) (Bikunin) (EDC1) (HI-30) (Uronic-acid-rich protein); Trypstatin]	39500000	7.5966	Secreted.	Expressed by the liver and secreted in plasma. Alpha-1-microglobulin occurs in many physiological fluids including plasma, urine, and cerebrospinal fluid. Inter-alpha-trypsin inhibitor is present in plasma and urine.
P12259	FA5_HUMAN	Coagulation factor V (Activated protein C cofactor) (Proaccelerin, labile factor) [Cleaved into: Coagulation factor V heavy chain; Coagulation factor V light chain]	3.86621e+07	7.58729	Secreted	Plasma.
P13671	CO6_HUMAN	Complement component C6	35925000	7.5554	Secreted.
P02743	SAMP_HUMAN	Serum amyloid P-component (SAP) (9.5S alpha-1-glycoprotein) [Cleaved into: Serum amyloid P-component(1-203)]	3.50204e+07	7.54432	Secreted.	Found in serum and urine.
P05156	CFAI_HUMAN	Complement factor I (EC 3.4.21.45) (C3B/C4B inactivator) [Cleaved into: Complement factor I heavy chain; Complement factor I light chain]	35000000	7.54407	Secreted, extracellular space. Secreted	Expressed in the liver by hepatocytes (PubMed:6327681). Also present in other cells such as monocytes, fibroblasts or keratinocytes (PubMed:6444659, PubMed:17320177).
P15169	CBPN_HUMAN	Carboxypeptidase N catalytic chain (CPN) (EC 3.4.17.3) (Anaphylatoxin inactivator) (Arginine carboxypeptidase) (Carboxypeptidase N polypeptide 1) (Carboxypeptidase N small subunit) (Kininase-1) (Lysine carboxypeptidase) (Plasma carboxypeptidase B) (Serum carboxypeptidase N) (SCPN)	35000000	7.54407	Secreted, extracellular space.	Synthesized in the liver and secreted in plasma.
P03952	KLKB1_HUMAN	Plasma kallikrein (EC 3.4.21.34) (Fletcher factor) (Kininogenin) (Plasma prekallikrein) (PKK) [Cleaved into: Plasma kallikrein heavy chain; Plasma kallikrein light chain]	3.42e+07	7.53403	Secreted.
P05452	TETN_HUMAN	Tetranectin (TN) (C-type lectin domain family 3 member B) (Plasminogen kringle 4-binding protein)	33100000	7.51983	Secreted.	Found in plasma.
P09871	C1S_HUMAN	Complement C1s subcomponent (EC 3.4.21.42) (C1 esterase) (Complement component 1 subcomponent s) [Cleaved into: Complement C1s subcomponent heavy chain; Complement C1s subcomponent light chain]	33040000	7.51904
P35542	SAA4_HUMAN	Serum amyloid A-4 protein (Constitutively expressed serum amyloid A protein) (C-SAA)	30000000	7.47712	Secreted.	Expressed by the liver; secreted in plasma.
P68871	HBB_HUMAN	Hemoglobin subunit beta (Beta-globin) (Hemoglobin beta chain) [Cleaved into: LVV-hemorphin-7; Spinorphin]	30000000	7.47712		Red blood cells.
P02042	HBD_HUMAN	Hemoglobin subunit delta (Delta-globin) (Hemoglobin delta chain)	30000000	7.47712		Red blood cells.
P01019	ANGT_HUMAN	Angiotensinogen (Serpin A8) [Cleaved into: Angiotensin-1 (Angiotensin 1-10) (Angiotensin I) (Ang I); Angiotensin-2 (Angiotensin 1-8) (Angiotensin II) (Ang II); Angiotensin-3 (Angiotensin 2-8) (Angiotensin III) (Ang III) (Des-Asp[1]-angiotensin II); Angiotensin-4 (Angiotensin 3-8) (Angiotensin IV) (Ang IV); Angiotensin 1-9; Angiotensin 1-7; Angiotensin 1-5; Angiotensin 1-4]	2.93771e+07	7.46801	Secreted.	Expressed by the liver and secreted in plasma.
P04264	K2C1_HUMAN	Keratin, type II cytoskeletal 1 (67 kDa cytokeratin) (Cytokeratin-1) (CK-1) (Hair alpha protein) (Keratin-1) (K1) (Type-II keratin Kb1)	28000000	7.44716	Cell membrane Note=Located on plasma membrane of neuroblastoma NMB7 cells.	The source of this protein is neonatal foreskin. The 67-kDa type II keratins are expressed in terminally differentiating epidermis.
P02649	APOE_HUMAN	Apolipoprotein E (Apo-E)	26473750	7.42282	Secreted Secreted, extracellular space Secreted, extracellular space, extracellular matrix Note=In the plasma, APOE is associated with chylomicrons, chylomicrons remnants, VLDL, LDL and HDL lipoproteins (PubMed:1911868, PubMed:8340399). Lipid poor oligomeric APOE is associated with the extracellular matrix in a calcium- and heparan-sulfate proteoglycans-dependent manner (PubMed:9488694). Lipidati…	Produced by several tissues and cell types and mainly found associated with lipid particles in the plasma, the interstitial fluid and lymph (PubMed:25173806). Mainly synthesized by liver hepatocytes (PubMed:25173806). Significant quantities are also produced in brain, mainly by astrocytes and glial cells in the cerebral cortex, but also by neurons in frontal cortex and hippocampus (PubMed:3115992…
P02654	APOC1_HUMAN	Apolipoprotein C-I (Apo-CI) (ApoC-I) (Apolipoprotein C1) [Cleaved into: Truncated apolipoprotein C-I]	2.46491e+07	7.3918	Secreted	Synthesized mainly in liver and to a minor degree in intestine. Also found in the lung and spleen.
P19827	ITIH1_HUMAN	Inter-alpha-trypsin inhibitor heavy chain H1 (ITI heavy chain H1) (ITI-HC1) (Inter-alpha-inhibitor heavy chain 1) (Inter-alpha-trypsin inhibitor complex component III) (Serum-derived hyaluronan-associated protein) (SHAP)	24000000	7.38021	Secreted.
P06681	CO2_HUMAN	Complement C2 (EC 3.4.21.43) (C3/C5 convertase) [Cleaved into: Complement C2b fragment; Complement C2a fragment]	23000000	7.36173	Secreted.
P19823	ITIH2_HUMAN	Inter-alpha-trypsin inhibitor heavy chain H2 (ITI heavy chain H2) (ITI-HC2) (Inter-alpha-inhibitor heavy chain 2) (Inter-alpha-trypsin inhibitor complex component II) (Serum-derived hyaluronan-associated protein) (SHAP)	21000000	7.32222	Secreted.	Plasma.
P00748	FA12_HUMAN	Coagulation factor XII (EC 3.4.21.38) (Hageman factor) (HAF) [Cleaved into: Coagulation factor XIIa heavy chain; Beta-factor XIIa part 1; Coagulation factor XIIa light chain (Beta-factor XIIa part 2)]	1.81292e+07	7.25838	Secreted.
P18428	LBP_HUMAN	Lipopolysaccharide-binding protein (LBP)	17500000	7.24304	Secreted Cytoplasmic granule membrane Note=Membrane-associated in polymorphonuclear Leukocytes (PMN) granules.	Detected in blood serum (at protein level).
P07225	PROS_HUMAN	Vitamin K-dependent protein S	17425000	7.24117	Secreted.	Plasma.
P35858	ALS_HUMAN	Insulin-like growth factor-binding protein complex acid labile subunit (ALS)	16500000	7.21748	Secreted, extracellular space.	Plasma.
P27918	PROP_HUMAN	Properdin (Complement factor P)	16332500	7.21305	Secreted.
P20742	PZP_HUMAN	Pregnancy zone protein (C3 and PZP-like alpha-2-macroglobulin domain-containing protein 6)	15900000	7.2014	Secreted.	Plasma. Prominent constituent of late-pregnancy sera.
P00488	F13A_HUMAN	Coagulation factor XIII A chain (Coagulation factor XIIIa) (EC 2.3.2.13) (Protein-glutamine gamma-glutamyltransferase A chain) (Transglutaminase A chain)	15372600	7.18675	Cytoplasm. Secreted Note=Secreted into the blood plasma. Cytoplasmic in most tissues, but also secreted in the blood plasma.
P22352	GPX3_HUMAN	Glutathione peroxidase 3 (GPx-3) (GSHPx-3) (EC 1.11.1.9) (Extracellular glutathione peroxidase) (Plasma glutathione peroxidase) (GPx-P) (GSHPx-P)	14600000	7.16435	Secreted.	Secreted in plasma.
Q96PD5	PGRP2_HUMAN	N-acetylmuramoyl-L-alanine amidase (EC 3.5.1.28) (Peptidoglycan recognition protein 2) (Peptidoglycan recognition protein long) (PGRP-L)	14000000	7.14613	Secreted. Membrane.	Strongly expressed in liver and fetal liver, and secreted into serum. Expressed to a much lesser extent in transverse colon, lymph nodes, heart, thymus, pancreas, descending colon, stomach and testis. Isoform 2 is not detected in the liver or serum.
P41222	PTGDS_HUMAN	Prostaglandin-H2 D-isomerase (EC 5.3.99.2) (Beta-trace protein) (Cerebrin-28) (Glutathione-independent PGD synthase) (Lipocalin-type prostaglandin-D synthase) (Prostaglandin-D2 synthase) (PGD2 synthase) (PGDS) (PGDS2)	12000000	7.07918	Rough endoplasmic reticulum Nucleus membrane Golgi apparatus Cytoplasm, perinuclear region Secreted Note=Detected on rough endoplasmic reticulum of arachnoid and menigioma cells. Localized to the nuclear envelope, Golgi apparatus, secretory vesicles and spherical cytoplasmic structures in arachnoid trabecular cells, and to circular cytoplasmic structures in meningeal macrophages and perivascular …	Abundant in the brain and CNS, where it is expressed in tissues of the blood-brain barrier and secreted into the cerebro-spinal fluid. Abundantly expressed in the heart. In the male reproductive system, it is expressed in the testis, epididymis and prostate, and is secreted into the seminal fluid. Expressed in the eye and secreted into the aqueous humor. Lower levels detected in various tissue fl…
P29622	KAIN_HUMAN	Kallistatin (Kallikrein inhibitor) (Peptidase inhibitor 4) (PI-4) (Serpin A4)	1.16e+07	7.06446	Secreted.	Expressed by the liver and secreted in plasma.
P04003	C4BPA_HUMAN	C4b-binding protein alpha chain (C4bp) (Proline-rich protein) (PRP)	11000000	7.04139	Secreted.	Chylomicrons in the plasma.
Q9NP73	ALG13_HUMAN	Putative bifunctional UDP-N-acetylglucosamine transferase and deubiquitinase ALG13 (EC 2.4.1.141) (EC 3.4.19.12) (Asparagine-linked glycosylation 13 homolog) (Glycosyltransferase 28 domain-containing protein 1) (UDP-N-acetylglucosamine transferase subunit ALG13 homolog)	1.04333e+07	7.01842	Isoform 2: Endoplasmic reticulum Note=Could be recruited to the cytosolic face of the endoplasmic reticulum membrane through its interaction with ALG14.
P05543	THBG_HUMAN	Thyroxine-binding globulin (Serpin A7) (T4-binding globulin)	1.04333e+07	7.01842	Secreted.	Expressed by the liver and secreted in plasma.
P0DJI8	SAA1_HUMAN	Serum amyloid A-1 protein (SAA) [Cleaved into: Amyloid protein A (Amyloid fibril protein AA); Serum amyloid protein A(2-104); Serum amyloid protein A(3-104); Serum amyloid protein A(2-103); Serum amyloid protein A(2-102); Serum amyloid protein A(4-101)]	9.13333e+06	6.96063	Secreted	Expressed by the liver; secreted in plasma (at protein level).
P05160	F13B_HUMAN	Coagulation factor XIII B chain (Fibrin-stabilizing factor B subunit) (Protein-glutamine gamma-glutamyltransferase B chain) (Transglutaminase B chain)	8940000	6.95134	Secreted
Q07954	LRP1_HUMAN	Prolow-density lipoprotein receptor-related protein 1 (LRP-1) (Alpha-2-macroglobulin receptor) (A2MR) (Apolipoprotein E receptor) (APOER) (CD antigen CD91) [Cleaved into: Low-density lipoprotein receptor-related protein 1 85 kDa subunit (LRP-85); Low-density lipoprotein receptor-related protein 1 515 kDa subunit (LRP-515); Low-density lipoprotein receptor-related protein 1 intracellular domain (L…	8400000	6.92428	Low-density lipoprotein receptor-related protein 1 85 kDa subunit: Cell membrane; Single-pass type I membrane protein. Membrane, coated pit.; Low-density lipoprotein receptor-related protein 1 515 kDa subunit: Cell membrane; Peripheral membrane protein; Extracellular side. Membrane, coated pit.; Low-density lipoprotein receptor-related protein 1 intracellular domain: Cytoplasm. Nucleus. Note=Afte…	Most abundant in liver, brain and lung.
P00742	FA10_HUMAN	Coagulation factor X (EC 3.4.21.6) (Stuart factor) (Stuart-Prower factor) [Cleaved into: Factor X light chain; Factor X heavy chain; Activated factor Xa heavy chain]	7.33333e+06	6.8653	Secreted.	Plasma; synthesized in the liver.
P02775	CXCL7_HUMAN	Platelet basic protein (PBP) (C-X-C motif chemokine 7) (Leukocyte-derived growth factor) (LDGF) (Macrophage-derived growth factor) (MDGF) (Small-inducible cytokine B7) [Cleaved into: Connective tissue-activating peptide III (CTAP-III) (LA-PF4) (Low-affinity platelet factor IV); TC-2; Connective tissue-activating peptide III(1-81) (CTAP-III(1-81)); Beta-thromboglobulin (Beta-TG); Neutrophil-activa…	7000000	6.8451	Secreted.
P36955	PEDF_HUMAN	Pigment epithelium-derived factor (PEDF) (Cell proliferation-inducing gene 35 protein) (EPC-1) (Serpin F1)	5.65143e+06	6.75216	Secreted Melanosome Note=Enriched in stage I melanosomes.	Retinal pigment epithelial cells and blood plasma.
O43866	CD5L_HUMAN	CD5 antigen-like (Apoptosis inhibitor expressed by macrophages) (hAIM) (CT-2) (IgM-associated peptide) (SP-alpha)	5600000	6.74819	Secreted Cytoplasm Note=Secreted by macrophages and circulates in the blood (PubMed:24223991, PubMed:24804991). Transported in the cytoplasm via CD36-mediated endocytosis (By similarity).	Expressed in spleen, lymph node, thymus, bone marrow, and fetal liver, but not in non-lymphoid tissues.
P01591	IGJ_HUMAN	Immunoglobulin J chain (Joining chain of multimeric IgA and IgM)	5600000	6.74819	Secreted
P0DJI9	SAA2_HUMAN	Serum amyloid A-2 protein (SAA2)	5.55e+06	6.74429	Secreted.	Expressed by the liver; secreted in plasma.
P05154	IPSP_HUMAN	Plasma serine protease inhibitor (Acrosomal serine protease inhibitor) (Plasminogen activator inhibitor 3) (PAI-3) (PAI3) (Protein C inhibitor) (PCI) (Serpin A5)	4800000	6.68124	Secreted, extracellular space Note=Localized on the plasma membrane overlying the acrosomal head of spermatozoa of ependymal spermatozoa and ejaculated sperm. Localized at the equatorial segment of acrosome-reacted spematozoa. Localized in alpha granules in resting platelets and on the external plasma membrane and within the surface-connected cannalicular system in activated platelets.	Predominantly expressed in the epithelium of seminal vesicles. Expressed in the proximal tubular epithelium of the kidney. Expressed in the superficial and more differentiated epidermal keratinocytes of the skin. Expressed in megakaryocytes and platelets. Expressed poorly in kidney tumor cells compared to non tumor kidney tissues. Expressed in spermatozoa. Present in very high concentration in se…
P07998	RNAS1_HUMAN	Ribonuclease pancreatic (EC 4.6.1.18) (HP-RNase) (RIB-1) (RNase UpI-1) (Ribonuclease 1) (RNase 1) (Ribonuclease A) (RNase A)	4700000	6.6721	Secreted.	Pancreas and other tissues and body fluids (indicating it may have other physiological functions besides its role in digestion).
P61769	B2MG_HUMAN	Beta-2-microglobulin [Cleaved into: Beta-2-microglobulin form pI 5.3]	4.44286e+06	6.64766	Secreted Cell surface Note=Detected in serum and urine (PubMed:1336137, PubMed:7554280).; Note=(Microbial infection) In the presence of M.tuberculosis EsxA-EsxB complex decreased amounts of B2M are found on the cell surface (PubMed:25356553).
Q96IY4	CBPB2_HUMAN	Carboxypeptidase B2 (EC 3.4.17.20) (Carboxypeptidase U) (CPU) (Plasma carboxypeptidase B) (pCPB) (Thrombin-activable fibrinolysis inhibitor) (TAFI)	4375000	6.64098	Secreted.	Plasma; synthesized in the liver.
Q13790	APOF_HUMAN	Apolipoprotein F (Apo-F) (Lipid transfer inhibitor protein) (LTIP)	4.1e+06	6.61278	Secreted	Expressed by the liver and secreted in plasma.
P04275	VWF_HUMAN	von Willebrand factor (vWF) [Cleaved into: von Willebrand antigen 2 (von Willebrand antigen II)]	4.068e+06	6.60938	Secreted Secreted, extracellular space, extracellular matrix Note=Localized to storage granules.	Plasma.
Q15848	ADIPO_HUMAN	Adiponectin (30 kDa adipocyte complement-related protein) (Adipocyte complement-related 30 kDa protein) (ACRP30) (Adipocyte, C1q and collagen domain-containing protein) (Adipose most abundant gene transcript 1 protein) (apM-1) (Gelatin-binding protein)	4.00667e+06	6.60278	Secreted	Synthesized exclusively by adipocytes and secreted into plasma.
P51884	LUM_HUMAN	Lumican (Keratan sulfate proteoglycan lumican) (KSPG lumican)	4000000	6.60206	Secreted, extracellular space, extracellular matrix	Cornea and other tissues.
P17936	IBP3_HUMAN	Insulin-like growth factor-binding protein 3 (IBP-3) (IGF-binding protein 3) (IGFBP-3)	3965250	6.59827	Secreted	Expressed by most tissues. Present in plasma.
P22792	CPN2_HUMAN	Carboxypeptidase N subunit 2 (Carboxypeptidase N 83 kDa chain) (Carboxypeptidase N large subunit) (Carboxypeptidase N polypeptide 2) (Carboxypeptidase N regulatory subunit)	3900000	6.59106	Secreted.
O14791	APOL1_HUMAN	Apolipoprotein L1 (Apolipoprotein L) (Apo-L) (ApoL) (Apolipoprotein L-I) (ApoL-I)	3.55e+06	6.55023	Secreted.	Plasma. Found on APOA-I-containing high density lipoprotein (HDL3). Expressed in pancreas, lung, prostate, liver, placenta and spleen.
P22692	IBP4_HUMAN	Insulin-like growth factor-binding protein 4 (IBP-4) (IGF-binding protein 4) (IGFBP-4)	3200000	6.50515	Secreted.
P00740	FA9_HUMAN	Coagulation factor IX (EC 3.4.21.22) (Christmas factor) (Plasma thromboplastin component) (PTC) [Cleaved into: Coagulation factor IXa light chain; Coagulation factor IXa heavy chain]	2.9e+06	6.4624	Secreted	Detected in blood plasma (at protein level) (PubMed:3857619, PubMed:8295821, PubMed:2592373, PubMed:9169594, PubMed:19846852). Synthesized primarily in the liver and secreted in plasma.
P07358	CO8B_HUMAN	Complement component C8 beta chain (Complement component 8 subunit beta)	2800000	6.44716	Secreted.
O00187	MASP2_HUMAN	Mannan-binding lectin serine protease 2 (EC 3.4.21.104) (MBL-associated serine protease 2) (Mannose-binding protein-associated serine protease 2) (MASP-2) [Cleaved into: Mannan-binding lectin serine protease 2 A chain; Mannan-binding lectin serine protease 2 B chain]	2800000	6.44716	Secreted.	Plasma.
P02750	A2GL_HUMAN	Leucine-rich alpha-2-glycoprotein (LRG)	2700000	6.43136	Secreted.	Plasma.
P02741	CRP_HUMAN	C-reactive protein [Cleaved into: C-reactive protein(1-205)]	2575000	6.41078	Secreted.	Found in plasma.
P00746	CFAD_HUMAN	Complement factor D (EC 3.4.21.46) (Adipsin) (C3 convertase activator) (Properdin factor D)	2396000	6.37949	Secreted.
P01034	CYTC_HUMAN	Cystatin-C (Cystatin-3) (Gamma-trace) (Neuroendocrine basic polypeptide) (Post-gamma-globulin)	2.07333e+06	6.31667	Secreted	Expressed in submandibular and sublingual saliva but not in parotid saliva (at protein level). Expressed in various body fluids, such as the cerebrospinal fluid and plasma. Expressed in highest levels in the epididymis, vas deferens, brain, thymus, and ovary and the lowest in the submandibular gland.
Q06033	ITIH3_HUMAN	Inter-alpha-trypsin inhibitor heavy chain H3 (ITI heavy chain H3) (ITI-HC3) (Inter-alpha-inhibitor heavy chain 3) (Serum-derived hyaluronan-associated protein) (SHAP)	2000000	6.30103	Secreted.
P06702	S10A9_HUMAN	Protein S100-A9 (Calgranulin-B) (Calprotectin L1H subunit) (Leukocyte L1 complex heavy chain) (Migration inhibitory factor-related protein 14) (MRP-14) (p14) (S100 calcium-binding protein A9)	1900000	6.27875	Secreted. Cytoplasm. Cytoplasm, cytoskeleton. Cell membrane; Peripheral membrane protein. Note=Predominantly localized in the cytoplasm. Upon elevation of the intracellular calcium level, translocated from the cytoplasm to the cytoskeleton and the cell membrane. Upon neutrophil activation or endothelial adhesion of monocytes, is secreted via a microtubule-mediated, alternative pathway.	Calprotectin (S100A8/9) is predominantly expressed in myeloid cells. Except for inflammatory conditions, the expression is restricted to a specific stage of myeloid differentiation since both proteins are expressed in circulating neutrophils and monocytes but are absent in normal tissue macrophages and lymphocytes. Under chronic inflammatory conditions, such as psoriasis and malignant disorders, …
O00602	FCN1_HUMAN	Ficolin-1 (Collagen/fibrinogen domain-containing protein 1) (Ficolin-A) (Ficolin-alpha) (M-ficolin)	1890000	6.27646	Secreted Cell membrane ; Peripheral membrane protein ; Extracellular side Note=Found on the monocyte and granulocyte surface (PubMed:20400674).	Peripheral blood leukocytes, monocytes and granulocytes. Also detected in spleen, lung, and thymus, may be due to the presence of tissue macrophages or trapped blood in these tissues. Not detected on lymphocytes.
P62328	TYB4_HUMAN	Thymosin beta-4 (T beta-4) (Fx) [Cleaved into: Hematopoietic system regulatory peptide (Seraspenide)]	1800000	6.25527	Cytoplasm, cytoskeleton.	Expressed in several hemopoietic cell lines and lymphoid malignant cells. Decreased levels in myeloma cells.
P24593	IBP5_HUMAN	Insulin-like growth factor-binding protein 5 (IBP-5) (IGF-binding protein 5) (IGFBP-5)	1700000	6.23045	Secreted.	Osteosarcoma, and at lower levels in liver, kidney and brain.
Q9UK55	ZPI_HUMAN	Protein Z-dependent protease inhibitor (PZ-dependent protease inhibitor) (PZI) (Serpin A10)	1600000	6.20412	Secreted.	Expressed by the liver and secreted in plasma.
O95445	APOM_HUMAN	Apolipoprotein M (Apo-M) (ApoM) (Protein G3a)	1500000	6.17609	Secreted Note=Present in high density lipoprotein (HDL) and to a lesser extent in triglyceride-rich lipoproteins (TGRLP) and low density lipoproteins (LDL).	Plasma protein. Expressed in liver and kidney.
P02745	C1QA_HUMAN	Complement C1q subcomponent subunit A	1200000	6.07918	Secreted.
P07360	CO8G_HUMAN	Complement component C8 gamma chain	1100000	6.04139	Secreted.
P24592	IBP6_HUMAN	Insulin-like growth factor-binding protein 6 (IBP-6) (IGF-binding protein 6) (IGFBP-6)	1100000	6.04139	Secreted.
O75636	FCN3_HUMAN	Ficolin-3 (Collagen/fibrinogen domain-containing lectin 3 p35) (Collagen/fibrinogen domain-containing protein 3) (Hakata antigen)	1000000	6	Secreted. Note=Found in blood plasma, bronchus, alveolus and bile duct.	Liver and lung. In liver it is produced by bile duct epithelial cells and hepatocytes. In lung it is produced by both ciliated bronchial epithelial cells and type II alveolar epithelial cells.
P02746	C1QB_HUMAN	Complement C1q subcomponent subunit B	930000	5.96848	Secreted.
P02747	C1QC_HUMAN	Complement C1q subcomponent subunit C	910000	5.95904	Secreted.
P13987	CD59_HUMAN	CD59 glycoprotein (1F5 antigen) (20 kDa homologous restriction factor) (HRF-20) (HRF20) (MAC-inhibitory protein) (MAC-IP) (MEM43 antigen) (Membrane attack complex inhibition factor) (MACIF) (Membrane inhibitor of reactive lysis) (MIRL) (Protectin) (CD antigen CD59)	910000	5.95904	Cell membrane; Lipid-anchor, GPI-anchor. Secreted. Note=Soluble form found in a number of tissues.
Q13103	SPP24_HUMAN	Secreted phosphoprotein 24 (Spp-24) (Secreted phosphoprotein 2)	800000	5.90309	Secreted.	Detected in liver and plasma.
Q16610	ECM1_HUMAN	Extracellular matrix protein 1 (Secretory component p85)	770000	5.88649	Secreted, extracellular space, extracellular matrix.	Expressed in breast cancer tissues. Little or no expression observed in normal breast tissues. Expressed in skin; wide expression is observed throughout the dermis with minimal expression in the epidermis.
P63261	ACTG_HUMAN	Actin, cytoplasmic 2 (Gamma-actin) [Cleaved into: Actin, cytoplasmic 2, N-terminally processed]	750000	5.87506	Cytoplasm, cytoskeleton
O75882	ATRN_HUMAN	Attractin (DPPT-L) (Mahogany homolog)	660000	5.81954	Isoform 1: Cell membrane ; Single-pass type I membrane protein; Isoform 2: Secreted; Isoform 3: Secreted	Isoform 2 is detected in plasma (at protein level). Expressed and secreted by activated T-lymphocytes. Expressed at low to moderate levels in peripheral blood leukocytes, spleen, lymph node, tonsil, bone marrow and fetal liver. At very low levels found in thymus. Isoform 2 is the major isoform in peripheral blood leukocytes.
P23142	FBLN1_HUMAN	Fibulin-1 (FIBL-1)	620000	5.79239	Secreted, extracellular space, extracellular matrix.	Isoform A and isoform B are only expressed in placenta. Isoform C and isoform D are expressed in a variety of tissues and cultured cells.
P00441	SODC_HUMAN	Superoxide dismutase [Cu-Zn] (EC 1.15.1.1) (Superoxide dismutase 1) (hSod1)	600000	5.77815	Cytoplasm Mitochondrion Nucleus Note=Predominantly cytoplasmic; the pathogenic variants ALS1 Arg-86 and Ala-94 gradually aggregates and accumulates in mitochondria.
Q99969	RARR2_HUMAN	Retinoic acid receptor responder protein 2 (Chemerin) (RAR-responsive protein TIG2) (Tazarotene-induced gene 2 protein)	570000	5.75587	Secreted	Expressed at the highest levels in placenta, liver, and white adipose tissue (WAT), and to a lesser extent in many other tissues such as lung, brown adipose tissue, heart, ovary, kidney, skeletal muscle and pancreas. Within WAT, expression is enriched in adipocytes as compared to the stromal vascular fraction. Expression and secretion increases dramatically with adipogenesis. Highly expressed in …
P14151	LYAM1_HUMAN	L-selectin (CD62 antigen-like family member L) (Leukocyte adhesion molecule 1) (LAM-1) (Leukocyte surface antigen Leu-8) (Leukocyte-endothelial cell adhesion molecule 1) (LECAM1) (Lymph node homing receptor) (TQ1) (gp90-MEL) (CD antigen CD62L)	564750	5.75186	Cell membrane ; Single-pass type I membrane protein	Expressed in B-cell lines and T-lymphocytes.
P20851	C4BPB_HUMAN	C4b-binding protein beta chain	530000	5.72428	Secreted.
Q14520	HABP2_HUMAN	Hyaluronan-binding protein 2 (EC 3.4.21.-) (Factor VII-activating protease) (Factor seven-activating protease) (FSAP) (Hepatocyte growth factor activator-like protein) (Plasma hyaluronan-binding protein) [Cleaved into: Hyaluronan-binding protein 2 50 kDa heavy chain; Hyaluronan-binding protein 2 50 kDa heavy chain alternate form; Hyaluronan-binding protein 2 27 kDa light chain; Hyaluronan-binding…	517200	5.71366	Secreted Note=Secreted as an inactive single-chain precursor and is then activated to a heterodimeric form.	Ubiquitously expressed.
P32119	PRDX2_HUMAN	Peroxiredoxin-2 (EC 1.11.1.15) (Natural killer cell-enhancing factor B) (NKEF-B) (PRP) (Thiol-specific antioxidant protein) (TSA) (Thioredoxin peroxidase 1) (Thioredoxin-dependent peroxide reductase 1)	510000	5.70757	Cytoplasm
P43251	BTD_HUMAN	Biotinidase (Biotinase) (EC 3.5.1.12)	490000	5.6902	Secreted, extracellular space.
Q16270	IBP7_HUMAN	Insulin-like growth factor-binding protein 7 (IBP-7) (IGF-binding protein 7) (IGFBP-7) (IGFBP-rP1) (MAC25 protein) (PGI2-stimulating factor) (Prostacyclin-stimulating factor) (Tumor-derived adhesion factor) (TAF)	480000	5.68124	Secreted.
P80108	PHLD_HUMAN	Phosphatidylinositol-glycan-specific phospholipase D (PI-G PLD) (EC 3.1.4.50) (Glycoprotein phospholipase D) (Glycosyl-phosphatidylinositol-specific phospholipase D) (GPI-PLD) (GPI-specific phospholipase D)	460000	5.66276	Secreted.
Q08380	LG3BP_HUMAN	Galectin-3-binding protein (Basement membrane autoantigen p105) (Lectin galactoside-binding soluble 3-binding protein) (Mac-2-binding protein) (MAC2BP) (Mac-2 BP) (Tumor-associated antigen 90K)	440000	5.64345	Secreted Secreted, extracellular space, extracellular matrix	Ubiquitous. Detected in body fluids such as semen, milk, serum, tears, saliva and urine. Expressed by keratinocytes and fibroblasts.
P08571	CD14_HUMAN	Monocyte differentiation antigen CD14 (Myeloid cell-specific leucine-rich glycoprotein) (CD antigen CD14) [Cleaved into: Monocyte differentiation antigen CD14, urinary form; Monocyte differentiation antigen CD14, membrane-bound form]	420000	5.62325	Cell membrane ; Lipid-anchor, GPI-anchor Secreted Membrane raft Golgi apparatus Note=Secreted forms may arise by cleavage of the GPI anchor.	Detected on macrophages (at protein level) (PubMed:1698311). Expressed strongly on the surface of monocytes and weakly on the surface of granulocytes; also expressed by most tissue macrophages.
P04070	PROC_HUMAN	Vitamin K-dependent protein C (EC 3.4.21.69) (Anticoagulant protein C) (Autoprothrombin IIA) (Blood coagulation factor XIV) [Cleaved into: Vitamin K-dependent protein C light chain; Vitamin K-dependent protein C heavy chain; Activation peptide]	411250	5.61411	Secreted Golgi apparatus Endoplasmic reticulum	Plasma; synthesized in the liver.
P21333	FLNA_HUMAN	Filamin-A (FLN-A) (Actin-binding protein 280) (ABP-280) (Alpha-filamin) (Endothelial actin-binding protein) (Filamin-1) (Non-muscle filamin)	410000	5.61278	Cytoplasm, cell cortex. Cytoplasm, cytoskeleton.	Ubiquitous.
P01344	IGF2_HUMAN	Insulin-like growth factor II (IGF-II) (Somatomedin-A) (T3M-11-derived growth factor) [Cleaved into: Insulin-like growth factor II; Insulin-like growth factor II Ala-25 Del; Preptin]	410000	5.61278	Secreted	Expressed in heart, placenta, lung, liver, muscle, kidney, tongue, limb, eye and pancreas.
P02452	CO1A1_HUMAN	Collagen alpha-1(I) chain (Alpha-1 type I collagen)	390000	5.59106	Secreted, extracellular space, extracellular matrix	Forms the fibrils of tendon, ligaments and bones. In bones the fibrils are mineralized with calcium hydroxyapatite.
P02786	TFR1_HUMAN	Transferrin receptor protein 1 (TR) (TfR) (TfR1) (Trfr) (T9) (p90) (CD antigen CD71) [Cleaved into: Transferrin receptor protein 1, serum form (sTfR)]	388017	5.58885	Cell membrane ; Single-pass type II membrane protein Melanosome Note=Identified by mass spectrometry in melanosome fractions from stage I to stage IV.; Transferrin receptor protein 1, serum form: Secreted
Q6UXB8	PI16_HUMAN	Peptidase inhibitor 16 (PI-16) (Cysteine-rich secretory protein 9) (CRISP-9) (PSP94-binding protein) (CD antigen CD364)	375500	5.57461	Secreted	Expressed in prostate, testis, ovary and intestine. Concentrates in prostate cancer patient's sera.
P07478	TRY2_HUMAN	Trypsin-2 (EC 3.4.21.4) (Anionic trypsinogen) (Serine protease 2) (Trypsin II)	370000	5.5682	Secreted, extracellular space.	Expressed in Paneth cells, at the base of small intestinal crypts.
Q01459	DIAC_HUMAN	Di-N-acetylchitobiase (EC 3.2.1.-)	360000	5.5563	Lysosome.
Q96S96	PEBP4_HUMAN	Phosphatidylethanolamine-binding protein 4 (PEBP-4) (hPEBP4) (Protein cousin-of-RKIP 1)	350000	5.54407	Lysosome	Ubiquitously expressed. Highly expressed in tumor cells.
Q9Y490	TLN1_HUMAN	Talin-1	340000	5.53148	Cell projection, ruffle membrane ; Peripheral membrane protein ; Cytoplasmic side Cytoplasm, cytoskeleton Cell surface Cell junction, focal adhesion Note=Colocalizes with LAYN at the membrane ruffles. Localized preferentially in focal adhesions than fibrillar adhesions (By similarity).
P67936	TPM4_HUMAN	Tropomyosin alpha-4 chain (TM30p1) (Tropomyosin-4)	340000	5.53148	Cytoplasm, cytoskeleton Note=Associates with F-actin stress fibers.	Detected in cardiac tissue and platelets, the form found in cardiac tissue is a higher molecular weight than the form found in platelets. Expressed at higher levels in the platelets of hypertensive patients with cardiac hypertrophy than in the platelets of hypertensive patients without cardiac hypertrophy (at protein level).
P03950	ANGI_HUMAN	Angiogenin (EC 3.1.27.-) (Ribonuclease 5) (RNase 5)	340000	5.53148	Cytoplasmic vesicle, secretory vesicle lumen Secreted Nucleus Nucleus, nucleolus Note=Rapidly endocytosed by target cells and translocated to the nucleus where it accumulates in the nucleolus and binds to DNA (PubMed:12051708).	Expressed predominantly in the liver. Also detected in endothelial cells and spinal cord neurons.
Q8WZ75	ROBO4_HUMAN	Roundabout homolog 4 (Magic roundabout)	340000	5.53148		Specifically expressed in endothelial cells. Expressed at sites of angiogenesis in different tumor types.
P22891	PROZ_HUMAN	Vitamin K-dependent protein Z	339333	5.53063	Secreted.	Plasma.
Q04756	HGFA_HUMAN	Hepatocyte growth factor activator (HGF activator) (HGFA) (EC 3.4.21.-) [Cleaved into: Hepatocyte growth factor activator short chain; Hepatocyte growth factor activator long chain]	320000	5.50515	Secreted. Note=Secreted as an inactive single-chain precursor and is then activated to a heterodimeric form.	Liver.
Q9Y6R7	FCGBP_HUMAN	IgGFc-binding protein (Fcgamma-binding protein antigen) (FcgammaBP)	300000	5.47712	Secreted	Mainly expressed in placenta and colon epithelium. Expressed in thyroid, and down-regulated in thyroid carcinomas. Present in serum, with higher levels in patients with various autoimmune diseases (at protein level).
P00915	CAH1_HUMAN	Carbonic anhydrase 1 (EC 4.2.1.1) (Carbonate dehydratase I) (Carbonic anhydrase B) (CAB) (Carbonic anhydrase I) (CA-I)	296950	5.47268	Cytoplasm.
P08709	FA7_HUMAN	Coagulation factor VII (EC 3.4.21.21) (Proconvertin) (Serum prothrombin conversion accelerator) (SPCA) (Eptacog alfa) [Cleaved into: Factor VII light chain; Factor VII heavy chain]	289833	5.46215	Secreted.	Plasma.
P11597	CETP_HUMAN	Cholesteryl ester transfer protein (Lipid transfer protein I)	286967	5.45783	Secreted, extracellular space Note=Secreted in plasma.	Expressed by the liver and secreted in plasma.
P07996	TSP1_HUMAN	Thrombospondin-1 (Glycoprotein G)	280000	5.44716	Secreted Cell surface Secreted, extracellular space, extracellular matrix Endoplasmic reticulum Sarcoplasmic reticulum Note=Secreted by thrombin-activated platelets and binds to the cell surface in the presence of extracellular Ca(2+) (PubMed:6777381). Incorporated into the extracellular matrix of fibroblasts (PubMed:6341993). Also detected in the endoplasmic reticulum and sarcoplasmic reticulum …
Q9UGM5	FETUB_HUMAN	Fetuin-B (16G2) (Fetuin-like protein IRL685) (Gugu)	270000	5.43136	Secreted	Liver and testis.
P05109	S10A8_HUMAN	Protein S100-A8 (Calgranulin-A) (Calprotectin L1L subunit) (Cystic fibrosis antigen) (CFAG) (Leukocyte L1 complex light chain) (Migration inhibitory factor-related protein 8) (MRP-8) (p8) (S100 calcium-binding protein A8) (Urinary stone protein band A)	270000	5.43136	Secreted. Cytoplasm. Cytoplasm, cytoskeleton. Cell membrane; Peripheral membrane protein. Note=Predominantly localized in the cytoplasm. Upon elevation of the intracellular calcium level, translocated from the cytoplasm to the cytoskeleton and the cell membrane. Upon neutrophil activation or endothelial adhesion of monocytes, is secreted via a microtubule-mediated, alternative pathway.	Calprotectin (S100A8/9) is predominantly expressed in myeloid cells. Except for inflammatory conditions, the expression is restricted to a specific stage of myeloid differentiation since both proteins are expressed in circulating neutrophils and monocytes but are absent in normal tissue macrophages and lymphocytes. Under chronic inflammatory conditions, such as psoriasis and malignant disorders, …
P04080	CYTB_HUMAN	Cystatin-B (CPI-B) (Liver thiol proteinase inhibitor) (Stefin-B)	270000	5.43136	Cytoplasm Nucleus
Q15828	CYTM_HUMAN	Cystatin-M (Cystatin-6) (Cystatin-E)	265000	5.42325	Secreted.	Restricted to the stratum granulosum of normal skin, the stratum granulosum/spinosum of psoriatic skin, and the secretory coils of eccrine sweat glands. Low expression levels are found in the nasal cavity.
Q92954	PRG4_HUMAN	Proteoglycan 4 (Lubricin) (Megakaryocyte-stimulating factor) (Superficial zone proteoglycan) [Cleaved into: Proteoglycan 4 C-terminal part]	260000	5.41497	Secreted	Highly expressed in synovial tissue, cartilage and liver and weakly in heart and lung. Isoform B is expressed in kidney, lung, liver, heart and brain. Isoform C and isoform D are widely expressed.
Q12805	FBLN3_HUMAN	EGF-containing fibulin-like extracellular matrix protein 1 (Extracellular protein S1-5) (Fibrillin-like protein) (Fibulin-3) (FIBL-3)	260000	5.41497	Secreted, extracellular space Secreted, extracellular space, extracellular matrix Note=Localizes to the lamina propria underneath the olfactory epithelium.	In the eye, associated with photoreceptor outer and inner segment regions, the nerve fiber layer, outer nuclear layer and inner and outer plexiform layers of the retina.
Q9NZP8	C1RL_HUMAN	Complement C1r subcomponent-like protein (C1r-LP) (C1r-like protein) (EC 3.4.21.-) (C1r-like serine protease analog protein) (CLSPa)	260000	5.41497	Secreted	Highly expressed in placenta, liver, kidney, pancreas, moderately in lung, spleen, prostate, ovary, colon, and PBL, and weakly in heart, skeletal muscle, thymus, testis, and small intestine. Expressed in PC-3 (prostate adenocarcinoma) and SK-OV-3 (ovary adenocarcinoma) cells, but not in LoVo and HT-29 (colon adenocarcinoma), SMMC7721 (hepatocellular carcinoma), CaoV-3 (ovary adenocarcinoma), HeLa…
P08253	MMP2_HUMAN	72 kDa type IV collagenase (EC 3.4.24.24) (72 kDa gelatinase) (Gelatinase A) (Matrix metalloproteinase-2) (MMP-2) (TBE-1) [Cleaved into: PEX]	254171	5.40513	Isoform 1: Secreted, extracellular space, extracellular matrix Membrane. Nucleus. Note=Colocalizes with integrin alphaV/beta3 at the membrane surface in angiogenic blood vessels and melanomas. Found in mitochondria, along microfibrils, and in nuclei of cardiomyocytes.; Isoform 2: Cytoplasm. Mitochondrion.	Produced by normal skin fibroblasts. PEX is expressed in a number of tumors including gliomas, breast and prostate.
P22105	TENX_HUMAN	Tenascin-X (TN-X) (Hexabrachion-like protein)	235000	5.37107	Secreted, extracellular space, extracellular matrix.	Highly expressed in fetal adrenal, in fetal testis, fetal smooth, striated and cardiac muscle. Isoform XB-short is only expressed in the adrenal gland.
P07477	TRY1_HUMAN	Trypsin-1 (EC 3.4.21.4) (Beta-trypsin) (Cationic trypsinogen) (Serine protease 1) (Trypsin I) [Cleaved into: Alpha-trypsin chain 1; Alpha-trypsin chain 2]	234500	5.37014	Secreted, extracellular space.
Q96KN2	CNDP1_HUMAN	Beta-Ala-His dipeptidase (EC 3.4.13.20) (CNDP dipeptidase 1) (Carnosine dipeptidase 1) (Glutamate carboxypeptidase-like protein 2) (Serum carnosinase)	230000	5.36173	Secreted.	Found in serum and adult nervous central system. Absent in serum from patients with homocarnosinosis.
Q9H8L6	MMRN2_HUMAN	Multimerin-2 (EMILIN-3) (Elastin microfibril interface located protein 3) (Elastin microfibril interfacer 3) (EndoGlyx-1 p125/p140 subunit)	230000	5.36173	Secreted, extracellular space, extracellular matrix	Endothelium.
P10451	OSTP_HUMAN	Osteopontin (Bone sialoprotein 1) (Nephropontin) (Secreted phosphoprotein 1) (SPP-1) (Urinary stone protein) (Uropontin)	223333	5.34895	Secreted.	Bone. Found in plasma.
P04180	LCAT_HUMAN	Phosphatidylcholine-sterol acyltransferase (EC 2.3.1.43) (Lecithin-cholesterol acyltransferase) (Phospholipid-cholesterol acyltransferase)	220000	5.34242	Secreted Note=Secreted into blood plasma (PubMed:3458198, PubMed:8820107, PubMed:10222237). Produced in astrocytes and secreted into cerebral spinal fluid (CSF).	Detected in blood plasma (PubMed:3458198, PubMed:8820107, PubMed:10222237). Detected in cerebral spinal fluid (at protein level) (PubMed:10222237). Detected in liver (PubMed:3797244, PubMed:3458198). Expressed mainly in brain, liver and testes.
P04075	ALDOA_HUMAN	Fructose-bisphosphate aldolase A (EC 4.1.2.13) (Lung cancer antigen NY-LU-1) (Muscle-type aldolase)	210000	5.32222	Cytoplasm, myofibril, sarcomere, I band. Cytoplasm, myofibril, sarcomere, M line. Note=In skeletal muscle, accumulates around the M line and within the I band, colocalizing with FBP2 on both sides of the Z line in the absence of Ca(2+).
P13645	K1C10_HUMAN	Keratin, type I cytoskeletal 10 (Cytokeratin-10) (CK-10) (Keratin-10) (K10)	210000	5.32222	Secreted, extracellular space Cell surface Note=Localized on the surface of desquamated nasal epithelial cells (PubMed:12427098). Localized on the surface of lung cell lines (PubMed:19627498).	Seen in all suprabasal cell layers including stratum corneum. Expressed on the surface of lung cell lines (PubMed:19627498).
Q9NQ38	ISK5_HUMAN	Serine protease inhibitor Kazal-type 5 (Lympho-epithelial Kazal-type-related inhibitor) (LEKTI) [Cleaved into: Hemofiltrate peptide HF6478; Hemofiltrate peptide HF7665]	210000	5.32222	Secreted.	Highly expressed in the thymus and stratum corneum. Also found in the oral mucosa, parathyroid gland, Bartholin's glands, tonsils, and vaginal epithelium. Very low levels are detected in lung, kidney, and prostate.
P60174	TPIS_HUMAN	Triosephosphate isomerase (TIM) (EC 5.3.1.1) (Methylglyoxal synthase) (EC 4.2.3.3) (Triose-phosphate isomerase)	200000	5.30103	Cytoplasm
P19320	VCAM1_HUMAN	Vascular cell adhesion protein 1 (V-CAM 1) (VCAM-1) (INCAM-100) (CD antigen CD106)	196000	5.29226	Membrane; Single-pass type I membrane protein.	Expressed on inflamed vascular endothelium, as well as on macrophage-like and dendritic cell types in both normal and inflamed tissue.
P04278	SHBG_HUMAN	Sex hormone-binding globulin (SHBG) (Sex steroid-binding protein) (SBP) (Testis-specific androgen-binding protein) (ABP) (Testosterone-estradiol-binding globulin) (TeBG) (Testosterone-estrogen-binding globulin)	180500	5.25648	Secreted Note=In testis, it is synthesized by the Sertoli cells, secreted into the lumen of the seminiferous tubule and transported to the epididymis.	Isoform 1 and isoform 2 are present in liver and testis.
P63104	1433Z_HUMAN	14-3-3 protein zeta/delta (Protein kinase C inhibitor protein 1) (KCIP-1)	180000	5.25527	Cytoplasm Melanosome Note=Located to stage I to stage IV melanosomes.
Q16627	CCL14_HUMAN	C-C motif chemokine 14 (Chemokine CC-1/CC-3) (HCC-1/HCC-3) (HCC-1(1-74)) (NCC-2) (Small-inducible cytokine A14) [Cleaved into: HCC-1(3-74); HCC-1(4-74); HCC-1(9-74)]	174250	5.24117	Secreted.	Expressed constitutively in several normal tissues: spleen, liver, skeletal and heart muscle, gut, and bone marrow, present at high concentrations (1-80 nM) in plasma.
P05019	IGF1_HUMAN	Insulin-like growth factor I (IGF-I) (Mechano growth factor) (MGF) (Somatomedin-C)	170750	5.23236	Secreted
P06276	CHLE_HUMAN	Cholinesterase (EC 3.1.1.8) (Acylcholine acylhydrolase) (Butyrylcholine esterase) (Choline esterase II) (Pseudocholinesterase)	170000	5.23045	Secreted	Detected in blood plasma (at protein level). Present in most cells except erythrocytes.
Q8IXL6	FA20C_HUMAN	Extracellular serine/threonine protein kinase FAM20C (EC 2.7.11.1) (Dentin matrix protein 4) (DMP-4) (Golgi casein kinase) (Golgi-enriched fraction casein kinase) (GEF-CK)	160000	5.20412	Secreted Golgi apparatus	Widely expressed.
P48740	MASP1_HUMAN	Mannan-binding lectin serine protease 1 (EC 3.4.21.-) (Complement factor MASP-3) (Complement-activating component of Ra-reactive factor) (Mannose-binding lectin-associated serine protease 1) (MASP-1) (Mannose-binding protein-associated serine protease) (Ra-reactive factor serine protease p100) (RaRF) (Serine protease 5) [Cleaved into: Mannan-binding lectin serine protease 1 heavy chain; Mannan-bi…	154500	5.18893	Secreted	Protein of the plasma which is primarily expressed by liver.
O00391	QSOX1_HUMAN	Sulfhydryl oxidase 1 (hQSOX) (EC 1.8.3.2) (Quiescin Q6)	150000	5.17609	Isoform 1: Golgi apparatus membrane ; Single-pass membrane protein Secreted Note=A small proportion is secreted, probably via a proteolytic cleavage that removes the membrane anchor.; Isoform 2: Secreted Note=Found in the extracellular medium of quiescent cells but is not found in proliferating cells.	Expressed in heart, placenta, lung, liver, skeletal muscle, pancreas and very weakly in brain and kidney.
P13797	PLST_HUMAN	Plastin-3 (T-plastin)	150000	5.17609	Cytoplasm.	Expressed in a variety of organs, including muscle, brain, uterus and esophagus.
P04040	CATA_HUMAN	Catalase (EC 1.11.1.6)	149200	5.17377	Peroxisome.
P05362	ICAM1_HUMAN	Intercellular adhesion molecule 1 (ICAM-1) (Major group rhinovirus receptor) (CD antigen CD54)	144000	5.15836	Membrane; Single-pass type I membrane protein.
Q02985	FHR3_HUMAN	Complement factor H-related protein 3 (FHR-3) (DOWN16) (H factor-like protein 3)	140000	5.14613	Secreted.	Expressed by the liver and secreted in plasma.
P62937	PPIA_HUMAN	Peptidyl-prolyl cis-trans isomerase A (PPIase A) (EC 5.2.1.8) (Cyclophilin A) (Cyclosporin A-binding protein) (Rotamase A) [Cleaved into: Peptidyl-prolyl cis-trans isomerase A, N-terminally processed]	140000	5.14613	Cytoplasm Secreted Note=Secretion occurs in response to oxidative stress in vascular smooth muscle through a vesicular secretory pathway that involves actin remodeling and myosin II activation, and mediates ERK1/2 activation.
Q15582	BGH3_HUMAN	Transforming growth factor-beta-induced protein ig-h3 (Beta ig-h3) (Kerato-epithelin) (RGD-containing collagen-associated protein) (RGD-CAP)	140000	5.14613	Secreted Secreted, extracellular space, extracellular matrix Note=May be associated both with microfibrils and with the cell surface (PubMed:8077289).	Highly expressed in the corneal epithelium (PubMed:27609313, PubMed:8077289). Expressed in heart, placenta, lung, liver, skeletal muscle, kidney and pancreas (PubMed:8077289).
P23528	COF1_HUMAN	Cofilin-1 (18 kDa phosphoprotein) (p18) (Cofilin, non-muscle isoform)	140000	5.14613	Nucleus matrix Cytoplasm, cytoskeleton Cell projection, ruffle membrane ; Peripheral membrane protein ; Cytoplasmic side Cell projection, lamellipodium membrane ; Peripheral membrane protein ; Cytoplasmic side Cell projection, lamellipodium Note=Colocalizes with the actin cytoskeleton in membrane ruffles and lamellipodia. Detected at the cleavage furrow and contractile ring during cytokinesis. Al…	Widely distributed in various tissues.
P30043	BLVRB_HUMAN	Flavin reductase (NADPH) (FR) (EC 1.5.1.30) (Biliverdin reductase B) (BVR-B) (EC 1.3.1.24) (Biliverdin-IX beta-reductase) (Green heme-binding protein) (GHBP) (NADPH-dependent diaphorase) (NADPH-flavin reductase) (FLR)	140000	5.14613	Cytoplasm	Predominantly expressed in liver and erythrocytes. At lower levels in heart, lung, adrenal gland and cerebrum.
P05062	ALDOB_HUMAN	Fructose-bisphosphate aldolase B (EC 4.1.2.13) (Liver-type aldolase)	130000	5.11394	Cytoplasm, cytoskeleton, microtubule organizing center, centrosome, centriolar satellite
P07737	PROF1_HUMAN	Profilin-1 (Epididymis tissue protein Li 184a) (Profilin I)	130000	5.11394	Cytoplasm, cytoskeleton.	Expressed in epididymis (at protein level).
P00995	ISK1_HUMAN	Serine protease inhibitor Kazal-type 1 (Pancreatic secretory trypsin inhibitor) (Tumor-associated trypsin inhibitor) (TATI)	125500	5.09864	Secreted
P98160	PGBM_HUMAN	Basement membrane-specific heparan sulfate proteoglycan core protein (HSPG) (Perlecan) (PLC) [Cleaved into: Endorepellin; LG3 peptide]	120000	5.07918	Secreted, extracellular space, extracellular matrix, basement membrane.	Found in the basement membranes.
P55290	CAD13_HUMAN	Cadherin-13 (Heart cadherin) (H-cadherin) (P105) (Truncated cadherin) (T-cad) (T-cadherin)	120000	5.07918	Cell membrane; Lipid-anchor, GPI-anchor.	Highly expressed in heart. In the CNS, expressed in cerebral cortex, medulla, hippocampus, amygdala, thalamus and substantia nigra. No expression detected in cerebellum or spinal cord.
P37802	TAGL2_HUMAN	Transgelin-2 (Epididymis tissue protein Li 7e) (SM22-alpha homolog)	120000	5.07918		Expressed in epididymis (at protein level).
P08294	SODE_HUMAN	Extracellular superoxide dismutase [Cu-Zn] (EC-SOD) (EC 1.15.1.1)	118000	5.07188	Secreted, extracellular space. Note=99% of EC-SOD is anchored to heparan sulfate proteoglycans in the tissue interstitium, and 1% is located in the vasculature in equilibrium between the plasma and the endothelium.	Expressed in blood vessels, heart, lung, kidney and placenta. Major SOD isoenzyme in extracellular fluids such as plasma, lymph and synovial fluid.
P09493	TPM1_HUMAN	Tropomyosin alpha-1 chain (Alpha-tropomyosin) (Tropomyosin-1)	114667	5.05944	Cytoplasm, cytoskeleton Note=Associates with F-actin stress fibers.	Detected in primary breast cancer tissues but undetectable in normal breast tissues in Sudanese patients. Isoform 1 is expressed in adult and fetal skeletal muscle and cardiac tissues, with higher expression levels in the cardiac tissues. Isoform 10 is expressed in adult and fetal cardiac tissues, but not in skeletal muscle.
P00451	FA8_HUMAN	Coagulation factor VIII (Antihemophilic factor) (AHF) (Procoagulant component) [Cleaved into: Factor VIIIa heavy chain, 200 kDa isoform; Factor VIIIa heavy chain, 92 kDa isoform; Factor VIII B chain; Factor VIIIa light chain]	112708	5.05195	Secreted, extracellular space.
Q15113	PCOC1_HUMAN	Procollagen C-endopeptidase enhancer 1 (Procollagen COOH-terminal proteinase enhancer 1) (PCPE-1) (Procollagen C-proteinase enhancer 1) (Type 1 procollagen C-proteinase enhancer protein) (Type I procollagen COOH-terminal proteinase enhancer)	110000	5.04139	Secreted.
P09172	DOPO_HUMAN	Dopamine beta-hydroxylase (EC 1.14.17.1) (Dopamine beta-monooxygenase) [Cleaved into: Soluble dopamine beta-hydroxylase]	110000	5.04139	Soluble dopamine beta-hydroxylase: Cytoplasmic vesicle, secretory vesicle lumen Cytoplasmic vesicle, secretory vesicle, chromaffin granule lumen Secreted; Cytoplasmic vesicle, secretory vesicle membrane ; Single-pass type II membrane protein Cytoplasmic vesicle, secretory vesicle, chromaffin granule membrane ; Single-pass type II membrane protein
P08567	PLEK_HUMAN	Pleckstrin (Platelet 47 kDa protein) (p47)	110000	5.04139
O14498	ISLR_HUMAN	Immunoglobulin superfamily containing leucine-rich repeat protein	110000	5.04139	Secreted	Expressed in various tissues including retina, heart, skeletal muscle, prostate, ovary, small intestine, thyroid, adrenal cortex, testis, stomach and spinal cord.
P26927	HGFL_HUMAN	Hepatocyte growth factor-like protein (Macrophage stimulatory protein) (Macrophage-stimulating protein) (MSP) [Cleaved into: Hepatocyte growth factor-like protein alpha chain; Hepatocyte growth factor-like protein beta chain]	109667	5.04007	Secreted.
P32942	ICAM3_HUMAN	Intercellular adhesion molecule 3 (ICAM-3) (CDw50) (ICAM-R) (CD antigen CD50)	101800	5.00775	Membrane; Single-pass type I membrane protein.	Leukocytes.
P35555	FBN1_HUMAN	Fibrillin-1 [Cleaved into: Asprosin]	100000	5	Secreted Note=Fibrillin-1 and Asprosin chains are still linked together during the secretion from cells, but are subsequently separated by furin (PubMed:24982166).; Asprosin: Secreted Note=Secreted into the plasma.; Fibrillin-1: Secreted, extracellular space, extracellular matrix
P11142	HSP7C_HUMAN	Heat shock cognate 71 kDa protein (Heat shock 70 kDa protein 8) (Lipopolysaccharide-associated protein 1) (LAP-1) (LPS-associated protein 1)	100000	5	Cytoplasm. Melanosome. Nucleus, nucleolus. Cell membrane. Note=Localized in cytoplasmic mRNP granules containing untranslated mRNAs. Translocates rapidly from the cytoplasm to the nuclei, and especially to the nucleoli, upon heat shock.	Ubiquitous.
P12111	CO6A3_HUMAN	Collagen alpha-3(VI) chain	100000	5	Secreted, extracellular space, extracellular matrix
P11021	BIP_HUMAN	Endoplasmic reticulum chaperone BiP (EC 3.6.4.10) (78 kDa glucose-regulated protein) (GRP-78) (Binding-immunoglobulin protein) (BiP) (Heat shock protein 70 family protein 5) (HSP70 family protein 5) (Heat shock protein family A member 5) (Immunoglobulin heavy chain-binding protein)	100000	5	Endoplasmic reticulum lumen Melanosome Cytoplasm Note=Identified by mass spectrometry in melanosome fractions from stage I to stage IV.
P27797	CALR_HUMAN	Calreticulin (CRP55) (Calregulin) (Endoplasmic reticulum resident protein 60) (ERp60) (HACBP) (grp60)	100000	5	Endoplasmic reticulum lumen Cytoplasm, cytosol Secreted, extracellular space, extracellular matrix Cell surface Sarcoplasmic reticulum lumen Note=Also found in cell surface (T cells), cytosol and extracellular matrix (PubMed:10358038). Associated with the lytic granules in the cytolytic T-lymphocytes.
P00558	PGK1_HUMAN	Phosphoglycerate kinase 1 (EC 2.7.2.3) (Cell migration-inducing gene 10 protein) (Primer recognition protein 2) (PRP 2)	99000	4.99564	Cytoplasm.	Mainly expressed in spermatogonia. Localized on the principle piece in the sperm (at protein level). Expression significantly decreased in the testis of elderly men.
P16070	CD44_HUMAN	CD44 antigen (CDw44) (Epican) (Extracellular matrix receptor III) (ECMR-III) (GP90 lymphocyte homing/adhesion receptor) (HUTCH-I) (Heparan sulfate proteoglycan) (Hermes antigen) (Hyaluronate receptor) (Phagocytic glycoprotein 1) (PGP-1) (Phagocytic glycoprotein I) (PGP-I) (CD antigen CD44)	96000	4.98227	Cell membrane ; Single-pass type I membrane protein Cell projection, microvillus Note=Colocalizes with actin in membrane protrusions at wounding edges. Co-localizes with RDX, EZR and MSN in microvilli. Localizes to cholesterol-rich membrane-bound lipid raft domains.	Isoform 10 (epithelial isoform) is expressed by cells of epithelium and highly expressed by carcinomas. Expression is repressed in neuroblastoma cells.
Q86VB7	C163A_HUMAN	Scavenger receptor cysteine-rich type 1 protein M130 (Hemoglobin scavenger receptor) (CD antigen CD163) [Cleaved into: Soluble CD163 (sCD163)]	94000	4.97313	Soluble CD163: Secreted; Cell membrane ; Single-pass type I membrane protein Note=Isoform 1 and isoform 2 show a lower surface expression when expressed in cells.	Expressed in monocytes and mature macrophages such as Kupffer cells in the liver, red pulp macrophages in the spleen, cortical macrophages in the thymus, resident bone marrow macrophages and meningeal macrophages of the central nervous system. Expressed also in blood. Isoform 1 is the lowest abundant in the blood. Isoform 2 is the lowest abundant in the liver and the spleen. Isoform 3 is the pred…
Q86YW5	TRML1_HUMAN	Trem-like transcript 1 protein (TLT-1) (Triggering receptor expressed on myeloid cells-like protein 1)	94000	4.97313	Cell membrane ; Single-pass type I membrane protein Cytoplasm Note=Sequestered in cytoplasmic vesicles in resting platelets (PubMed:15100151). Transported to the cell surface after stimulation by thrombin (PubMed:15100151). Soluble fragments can be released into the serum by proteolysis (PubMed:16505478).	Detected in platelets, monocytic leukemia and in T-cell leukemia.
P35443	TSP4_HUMAN	Thrombospondin-4	92000	4.96379	Endoplasmic reticulum Sarcoplasmic reticulum Secreted Secreted, extracellular space Secreted, extracellular space, extracellular matrix
P08493	MGP_HUMAN	Matrix Gla protein (MGP) (Cell growth-inhibiting gene 36 protein)	92000	4.96379	Secreted.
P04406	G3P_HUMAN	Glyceraldehyde-3-phosphate dehydrogenase (GAPDH) (EC 1.2.1.12) (Peptidyl-cysteine S-nitrosylase GAPDH) (EC 2.6.99.-)	91000	4.95904	Cytoplasm, cytosol Nucleus Cytoplasm, perinuclear region Membrane Cytoplasm, cytoskeleton Note=Translocates to the nucleus following S-nitrosylation and interaction with SIAH1, which contains a nuclear localization signal (By similarity). Postnuclear and Perinuclear regions.
P68366	TBA4A_HUMAN	Tubulin alpha-4A chain (Alpha-tubulin 1) (Testis-specific alpha-tubulin) (Tubulin H2-alpha) (Tubulin alpha-1 chain)	91000	4.95904	Cytoplasm, cytoskeleton.
O75083	WDR1_HUMAN	WD repeat-containing protein 1 (Actin-interacting protein 1) (AIP1) (NORI-1)	90000	4.95424	Cytoplasm, cytoskeleton Cell projection, podosome Cell junction
P18206	VINC_HUMAN	Vinculin (Metavinculin) (MV)	90000	4.95424	Cell membrane ; Peripheral membrane protein ; Cytoplasmic side Cell junction, adherens junction Cell junction, focal adhesion Cytoplasm, cytoskeleton Cell membrane, sarcolemma ; Peripheral membrane protein ; Cytoplasmic side Note=Recruitment to cell-cell junctions occurs in a myosin II-dependent manner. Interaction with CTNNB1 is necessary for its localization to the cell-cell junctions.	Metavinculin is muscle-specific.
Q9BUN1	MENT_HUMAN	Protein MENT (Methylated in normal thymocytes protein)	90000	4.95424	Secreted	Plasma. Overexpressed in lymphomas.
P14625	ENPL_HUMAN	Endoplasmin (94 kDa glucose-regulated protein) (GRP-94) (Heat shock protein 90 kDa beta member 1) (Tumor rejection antigen 1) (gp96 homolog)	88000	4.94448	Endoplasmic reticulum lumen. Melanosome. Note=Identified by mass spectrometry in melanosome fractions from stage I to stage IV.
P11226	MBL2_HUMAN	Mannose-binding protein C (MBP-C) (Collectin-1) (MBP1) (Mannan-binding protein) (Mannose-binding lectin)	87000	4.93952	Secreted	Plasma protein produced mainly in the liver.
Q6EMK4	VASN_HUMAN	Vasorin (Protein slit-like 2)	84000	4.92428	Membrane ; Single-pass type I membrane protein Secreted	Expressed at highest levels in aorta, at intermediate levels in kidney and placenta and at lowest levels in brain, heart, liver, lung and skeletal muscle. Within the aorta, the strongest expression is found in the tunica media of the proximal ascending aorta, the descending thoracic aorta, the abdominal aorta and the coronary arteries. Within the kidney, expression is found in the interstitial ce…
P01033	TIMP1_HUMAN	Metalloproteinase inhibitor 1 (Erythroid-potentiating activity) (EPA) (Fibroblast collagenase inhibitor) (Collagenase inhibitor) (Tissue inhibitor of metalloproteinases 1) (TIMP-1)	82687.5	4.91744	Secreted	Detected in rheumatoid synovial fluid (at protein level).
Q8NBP7	PCSK9_HUMAN	Proprotein convertase subtilisin/kexin type 9 (EC 3.4.21.-) (Neural apoptosis-regulated convertase 1) (NARC-1) (Proprotein convertase 9) (PC9) (Subtilisin/kexin-like protease PC9)	82000	4.91381	Cytoplasm. Secreted. Endosome. Lysosome. Cell surface. Endoplasmic reticulum. Golgi apparatus. Note=Autocatalytic cleavage is required to transport it from the endoplasmic reticulum to the Golgi apparatus and for the secretion of the mature protein. Localizes to the endoplasmic reticulum in the absence of LDLR and colocalizes to the cell surface and to the endosomes/lysosomes in the presence of L…	Expressed in neuro-epithelioma, colon carcinoma, hepatic and pancreatic cell lines, and in Schwann cells.
P02776	PLF4_HUMAN	Platelet factor 4 (PF-4) (C-X-C motif chemokine 4) (Iroplact) (Oncostatin-A) [Cleaved into: Platelet factor 4, short form (Endothelial cell growth inhibitor)]	76433.3	4.88328	Secreted
O15204	ADEC1_HUMAN	ADAM DEC1 (EC 3.4.24.-) (A disintegrin and metalloproteinase domain-like protein decysin-1) (ADAM-like protein decysin-1)	76000	4.88081	Secreted	Expressed highly in the small intestine and appendix, moderately in lymph node, mucosal lining of the colon, thymus, spleen and very weakly in the bone marrow. Predominantly expressed in dendritic cells (DC) of the germinal center. Weakly expressed in monocyte and highly expressed in macrophage. Absent in immature DC.
P35590	TIE1_HUMAN	Tyrosine-protein kinase receptor Tie-1 (EC 2.7.10.1)	75000	4.87506	Cell membrane ; Single-pass type I membrane protein	Specifically expressed in developing vascular endothelial cells.
P19022	CADH2_HUMAN	Cadherin-2 (CDw325) (Neural cadherin) (N-cadherin) (CD antigen CD325)	73000	4.86332	Cell membrane ; Single-pass type I membrane protein Cell membrane, sarcolemma Cell junction Cell surface Note=Colocalizes with TMEM65 at the intercalated disk in cardiomyocytes. Colocalizes with OBSCN at the intercalated disk and at sarcolemma in cardiomyocytes.
P12955	PEPD_HUMAN	Xaa-Pro dipeptidase (X-Pro dipeptidase) (EC 3.4.13.9) (Imidodipeptidase) (Peptidase D) (Proline dipeptidase) (Prolidase)	70000	4.8451
Q86TH1	ATL2_HUMAN	ADAMTS-like protein 2 (ADAMTSL-2)	67000	4.82607	Secreted
P09486	SPRC_HUMAN	SPARC (Basement-membrane protein 40) (BM-40) (Osteonectin) (ON) (Secreted protein acidic and rich in cysteine)	66000	4.81954	Secreted, extracellular space, extracellular matrix, basement membrane Note=In or around the basement membrane.
P07339	CATD_HUMAN	Cathepsin D (EC 3.4.23.5) [Cleaved into: Cathepsin D light chain; Cathepsin D heavy chain]	65966.7	4.81932	Lysosome. Melanosome. Secreted, extracellular space. Note=Identified by mass spectrometry in melanosome fractions from stage I to stage IV. In aortic samples, detected as an extracellular protein loosely bound to the matrix (PubMed:20551380).	Expressed in the aorta extracellular space (at protein level) (PubMed:20551380). Expressed in liver (at protein level) (PubMed:1426530).
P12830	CADH1_HUMAN	Cadherin-1 (CAM 120/80) (Epithelial cadherin) (E-cadherin) (Uvomorulin) (CD antigen CD324) [Cleaved into: E-Cad/CTF1; E-Cad/CTF2; E-Cad/CTF3]	65000	4.81291	Cell junction Cell membrane ; Single-pass type I membrane protein. Endosome. Golgi apparatus, trans-Golgi network. Note=Colocalizes with DLGAP5 at sites of cell-cell contact in intestinal epithelial cells. Anchored to actin microfilaments through association with alpha-, beta- and gamma-catenin. Sequential proteolysis induced by apoptosis or calcium influx, results in translocation from sites of …	Non-neural epithelial tissues.
Q86UD1	OAF_HUMAN	Out at first protein homolog (HCV NS5A-transactivated protein 13 target protein 2)	65000	4.81291
P55058	PLTP_HUMAN	Phospholipid transfer protein (Lipid transfer protein II)	64000	4.80618	Secreted.	Wide tissue distribution. Placenta > pancreas > lung > kidney > heart > liver > skeletal muscle > brain.
P12821	ACE_HUMAN	Angiotensin-converting enzyme (ACE) (EC 3.2.1.-) (EC 3.4.15.1) (Dipeptidyl carboxypeptidase I) (Kininase II) (CD antigen CD143) [Cleaved into: Angiotensin-converting enzyme, soluble form]	63700	4.80414	Angiotensin-converting enzyme, soluble form: Secreted.; Cell membrane; Single-pass type I membrane protein. Cytoplasm Note=Detected in both cell membrane and cytoplasm in neurons.	Ubiquitously expressed, with highest levels in lung, kidney, heart, gastrointestinal system and prostate. Isoform Testis-specific is expressed in spermatocytes and adult testis.
P16035	TIMP2_HUMAN	Metalloproteinase inhibitor 2 (CSC-21K) (Tissue inhibitor of metalloproteinases 2) (TIMP-2)	63350	4.80175	Secreted.
P03951	FA11_HUMAN	Coagulation factor XI (FXI) (EC 3.4.21.27) (Plasma thromboplastin antecedent) (PTA) [Cleaved into: Coagulation factor XIa heavy chain; Coagulation factor XIa light chain]	63000	4.79934	Secreted.	Isoform 2 is produced by platelets and megakaryocytes but absent from other blood cells.
P08637	FCG3A_HUMAN	Low affinity immunoglobulin gamma Fc region receptor III-A (CD16a antigen) (Fc-gamma RIII-alpha) (Fc-gamma RIII) (Fc-gamma RIIIa) (FcRIII) (FcRIIIa) (FcR-10) (IgG Fc receptor III-2) (CD antigen CD16a)	63000	4.79934	Cell membrane ; Single-pass type I membrane protein Secreted. Note=Exists also as a soluble receptor.	Expressed on natural killer cells, macrophages, subpopulation of T-cells, immature thymocytes and placental trophoblasts.
P08833	IBP1_HUMAN	Insulin-like growth factor-binding protein 1 (IBP-1) (IGF-binding protein 1) (IGFBP-1) (Placental protein 12) (PP12)	62600	4.79657	Secreted.
Q969E1	LEAP2_HUMAN	Liver-expressed antimicrobial peptide 2 (LEAP-2)	62000	4.79239	Secreted.
O00151	PDLI1_HUMAN	PDZ and LIM domain protein 1 (C-terminal LIM domain protein 1) (Elfin) (LIM domain protein CLP-36)	59000	4.77085	Cytoplasm Cytoplasm, cytoskeleton Cytoplasm, myofibril, sarcomere, Z line Note=Associates with actin stress fibers.	Strongly expressed in the heart and skeletal muscle, moderately expressed in the spleen, small intestine, colon, placenta, and lung. A lower level expression is seen in liver, thymus, kidney, prostate and pancreas and is not found in the brain, testis, ovary, and peripheral blood leukocytes.
O15467	CCL16_HUMAN	C-C motif chemokine 16 (Chemokine CC-4) (HCC-4) (Chemokine LEC) (IL-10-inducible chemokine) (LCC-1) (Liver-expressed chemokine) (Lymphocyte and monocyte chemoattractant) (LMC) (Monotactin-1) (MTN-1) (NCC-4) (Small-inducible cytokine A16)	59000	4.77085	Secreted.	Mainly expressed in liver, also found in spleen and thymus. Highly expressed in LPS- and IFN-gamma-activated monocytes, weakly in some lymphocytes, including natural killer cells, gamma-delta T-cells, and some T-cell clones.
Q92496	FHR4_HUMAN	Complement factor H-related protein 4 (FHR-4)	59000	4.77085	Secreted.	Expressed by the liver and secreted in plasma.
P19021	AMD_HUMAN	Peptidyl-glycine alpha-amidating monooxygenase (PAM) [Includes: Peptidylglycine alpha-hydroxylating monooxygenase (PHM) (EC 1.14.17.3); Peptidyl-alpha-hydroxyglycine alpha-amidating lyase (EC 4.3.2.5) (Peptidylamidoglycolate lyase) (PAL)]	59000	4.77085	Cytoplasmic vesicle, secretory vesicle membrane ; Single-pass membrane protein Note=Secretory granules.; Isoform 1: Membrane; Single-pass type I membrane protein.; Isoform 2: Membrane; Single-pass type I membrane protein.; Isoform 3: Secreted. Note=Secreted from secretory granules.; Isoform 4: Secreted. Note=Secreted from secretory granules.
P78509	RELN_HUMAN	Reelin (EC 3.4.21.-)	59000	4.77085	Secreted, extracellular space, extracellular matrix	Abundantly produced during brain ontogenesis by the Cajal-Retzius cells and other pioneer neurons located in the telencephalic marginal zone and by granule cells of the external granular layer of the cerebellum. In adult brain, preferentially expressed in GABAergic interneurons of prefrontal cortices, temporal cortex, hippocampus and glutamatergic granule cells of cerebellum. Expression is reduce…
Q99784	NOE1_HUMAN	Noelin (Neuronal olfactomedin-related ER localized protein) (Olfactomedin-1)	56000	4.74819	Secreted Cell junction, synapse Endoplasmic reticulum Cell projection, axon Perikaryon
P11684	UTER_HUMAN	Uteroglobin (Clara cell phospholipid-binding protein) (CCPBP) (Clara cells 10 kDa secretory protein) (CC10) (Secretoglobin family 1A member 1) (Urinary protein 1) (UP-1) (UP1) (Urine protein 1)	56000	4.74819	Secreted.	Clara cells (nonciliated cells of the surface epithelium of the pulmonary airways).
O95497	VNN1_HUMAN	Pantetheinase (EC 3.5.1.92) (Pantetheine hydrolase) (Tiff66) (Vascular non-inflammatory molecule 1) (Vanin-1)	56000	4.74819	Cell membrane ; Lipid-anchor, GPI-anchor	Widely expressed with higher expression in spleen, kidney and blood. Overexpressed in lesional psoriatic skin.
P06733	ENOA_HUMAN	Alpha-enolase (EC 4.2.1.11) (2-phospho-D-glycerate hydro-lyase) (C-myc promoter-binding protein) (Enolase 1) (MBP-1) (MPB-1) (Non-neural enolase) (NNE) (Phosphopyruvate hydratase) (Plasminogen-binding protein)	55000	4.74036	Cytoplasm Cell membrane Cytoplasm, myofibril, sarcomere, M line Note=Can translocate to the plasma membrane in either the homodimeric (alpha/alpha) or heterodimeric (alpha/gamma) form. ENO1 is localized to the M line.; Isoform MBP-1: Nucleus.	The alpha/alpha homodimer is expressed in embryo and in most adult tissues. The alpha/beta heterodimer and the beta/beta homodimer are found in striated muscle, and the alpha/gamma heterodimer and the gamma/gamma homodimer in neurons.
P13929	ENOB_HUMAN	Beta-enolase (EC 4.2.1.11) (2-phospho-D-glycerate hydro-lyase) (Enolase 3) (Muscle-specific enolase) (MSE) (Skeletal muscle enolase)	55000	4.74036	Cytoplasm. Note=Localized to the Z line. Some colocalization with CKM at M-band (By similarity).	The alpha/alpha homodimer is expressed in embryo and in most adult tissues. The alpha/beta heterodimer and the beta/beta homodimer are found in striated muscle, and the alpha/gamma heterodimer and the gamma/gamma homodimer in neurons.
Q14515	SPRL1_HUMAN	SPARC-like protein 1 (High endothelial venule protein) (Hevin) (MAST 9)	53000	4.72428	Secreted, extracellular space, extracellular matrix	Highly expressed in lymph node, brain, heart, lung, skeletal muscle, ovary, small intestine, and colon, with lower levels in placenta, pancreas, testis, spleen, and thymus, and no expression in kidney, liver, and peripheral blood leukocytes.
P61626	LYSC_HUMAN	Lysozyme C (EC 3.2.1.17) (1,4-beta-N-acetylmuramidase C)	51000	4.70757	Secreted.
P11047	LAMC1_HUMAN	Laminin subunit gamma-1 (Laminin B2 chain) (Laminin-1 subunit gamma) (Laminin-10 subunit gamma) (Laminin-11 subunit gamma) (Laminin-2 subunit gamma) (Laminin-3 subunit gamma) (Laminin-4 subunit gamma) (Laminin-6 subunit gamma) (Laminin-7 subunit gamma) (Laminin-8 subunit gamma) (Laminin-9 subunit gamma) (S-laminin subunit gamma) (S-LAM gamma)	50000	4.69897	Secreted, extracellular space, extracellular matrix, basement membrane.	Found in the basement membranes (major component).
P37840	SYUA_HUMAN	Alpha-synuclein (Non-A beta component of AD amyloid) (Non-A4 component of amyloid precursor) (NACP)	49000	4.6902	Cytoplasm Membrane Nucleus Cell junction, synapse Secreted Note=Membrane-bound in dopaminergic neurons.	Highly expressed in presynaptic terminals in the central nervous system. Expressed principally in brain.
P26038	MOES_HUMAN	Moesin (Membrane-organizing extension spike protein)	47000	4.6721	Cell membrane ; Peripheral membrane protein ; Cytoplasmic side Cytoplasm, cytoskeleton Apical cell membrane ; Peripheral membrane protein ; Cytoplasmic side Cell projection, microvillus membrane ; Peripheral membrane protein ; Cytoplasmic side Cell projection, microvillus Note=Phosphorylated form is enriched in microvilli-like structures at apical membrane. Increased cell membrane localization of…	In all tissues and cultured cells studied.
Q6UY14	ATL4_HUMAN	ADAMTS-like protein 4 (ADAMTSL-4) (Thrombospondin repeat-containing protein 1)	47000	4.6721	Secreted, extracellular space, extracellular matrix Note=Colocalizes with FMN1 microfibrils in the eye ECM.	Expressed in colon, heart, leukocyte, liver, lung, skeletal muscle, spleen, testis and placenta. Weaker expression in bone marrow, brain tissue, kidney and pancreas. Expression studies in fetal tissues reveal strong expression in heart, kidney, liver, lung and skeletal muscle, but weaker expression in fetal brain and skin.
P33151	CADH5_HUMAN	Cadherin-5 (7B4 antigen) (Vascular endothelial cadherin) (VE-cadherin) (CD antigen CD144)	46000	4.66276	Cell junction Cell membrane ; Single-pass type I membrane protein Note=Found at cell-cell boundaries and probably at cell-matrix boundaries. KRIT1 and CDH5 reciprocally regulate their localization to endothelial cell-cell junctions.	Endothelial tissues and brain.
Q14766	LTBP1_HUMAN	Latent-transforming growth factor beta-binding protein 1 (LTBP-1) (Transforming growth factor beta-1-binding protein 1) (TGF-beta1-BP-1)	46000	4.66276	Secreted Secreted, extracellular space, extracellular matrix	Expressed in the aorta (at protein level) (PubMed:17293099). Isoform Long: Expressed in fibroblasts (PubMed:17293099).
A1L4H1	SRCRL_HUMAN	Soluble scavenger receptor cysteine-rich domain-containing protein SSC5D (Soluble scavenger protein with 5 SRCR domains) (SSc5D)	44000	4.64345	Secreted Cytoplasm	Highly expressed in monocytes/macrophages and T-lymphocytes. Highly expressed in placenta and spleen, and also detected at lower levels in colon, and more weakly in lung, heart and kidney.
O00592	PODXL_HUMAN	Podocalyxin (GCTM-2 antigen) (Gp200) (Podocalyxin-like protein 1) (PC) (PCLP-1)	43000	4.63347	Apical cell membrane. Cell projection, lamellipodium. Cell projection, filopodium. Cell projection, ruffle. Cell projection, microvillus Membrane raft Membrane ; Single-pass type I membrane protein Note=In single attached epithelial cells is restricted to a preapical pole on the free plasma membrane whereas other apical and basolateral proteins are not yet polarized. Colocalizes with SLC9A3R2 at …	Glomerular epithelium cell (podocyte).
P14543	NID1_HUMAN	Nidogen-1 (NID-1) (Entactin)	42000	4.62325	Secreted, extracellular space, extracellular matrix, basement membrane.
P00918	CAH2_HUMAN	Carbonic anhydrase 2 (EC 4.2.1.1) (Carbonate dehydratase II) (Carbonic anhydrase C) (CAC) (Carbonic anhydrase II) (CA-II)	42000	4.62325	Cytoplasm Cell membrane Note=Colocalized with SLC26A6 at the surface of the cell membrane in order to form a bicarbonate transport metabolon. Displaced from the cytosolic surface of the cell membrane by PKC in phorbol myristate acetate (PMA)-induced cells.
P31146	COR1A_HUMAN	Coronin-1A (Coronin-like protein A) (Clipin-A) (Coronin-like protein p57) (Tryptophan aspartate-containing coat protein) (TACO)	41000	4.61278	Cytoplasm, cytoskeleton Cytoplasm, cell cortex Cytoplasmic vesicle, phagosome membrane Note=In non-infected macrophages, associated with the cortical microtubule network. In mycobacteria-infected macrophages, becomes progressively relocalized and retained around the mycobacterial phagosomes. Retention on the phagosomal membrane is strictly dependent on mycobacterial viability and not due to impai…	Expressed in brain, thymus, spleen, bone marrow and lymph node. Low in lung and gut.
P05186	PPBT_HUMAN	Alkaline phosphatase, tissue-nonspecific isozyme (AP-TNAP) (TNSALP) (EC 3.1.3.1) (Alkaline phosphatase liver/bone/kidney isozyme)	41000	4.61278	Cell membrane ; Lipid-anchor, GPI-anchor
Q13822	ENPP2_HUMAN	Ectonucleotide pyrophosphatase/phosphodiesterase family member 2 (E-NPP 2) (EC 3.1.4.39) (Autotaxin) (Extracellular lysophospholipase D) (LysoPLD)	39000	4.59106	Secreted	Detected in blood plasma (at protein level) (PubMed:12176993, PubMed:26371182). Predominantly expressed in brain, placenta, ovary, and small intestine. Expressed in a number of carcinomas such as hepatocellular and prostate carcinoma, neuroblastoma and non-small-cell lung cancer. Expressed in body fluids such as plasma, cerebral spinal fluid (CSF), saliva, follicular and amniotic fluids. Not dete…
P13598	ICAM2_HUMAN	Intercellular adhesion molecule 2 (ICAM-2) (CD antigen CD102)	37000	4.5682	Membrane ; Single-pass type I membrane protein Cell projection, microvillus Note=Co-localizes with RDX, EZR and MSN in microvilli.
P13501	CCL5_HUMAN	C-C motif chemokine 5 (EoCP) (Eosinophil chemotactic cytokine) (SIS-delta) (Small-inducible cytokine A5) (T cell-specific protein P228) (TCP228) (T-cell-specific protein RANTES) [Cleaved into: RANTES(3-68); RANTES(4-68)]	37000	4.5682	Secreted.	Expressed in the follicular fluid (at protein level). T-cell and macrophage specific.
P10646	TFPI1_HUMAN	Tissue factor pathway inhibitor (TFPI) (Extrinsic pathway inhibitor) (EPI) (Lipoprotein-associated coagulation inhibitor) (LACI)	35000	4.54407	Isoform Alpha: Secreted.; Isoform Beta: Microsome membrane ; Lipid-anchor, GPI-anchor	Mostly in endothelial cells.
Q5VY43	PEAR1_HUMAN	Platelet endothelial aggregation receptor 1 (hPEAR1) (Multiple epidermal growth factor-like domains protein 12) (Multiple EGF-like domains protein 12)	35000	4.54407	Cell membrane ; Single-pass membrane protein Note=Detected on the cell surface in resting platelets.	Expressed in umbilical vein endothelial cells and platelets (at protein level). Expressed in heart, kidney, skeletal muscle, pancreas, ovary, breast, lung, brain cortex, hypothalamus, spinal cord, dorsal root ganglion, endothelial cells of umbilical cord artery and vein, megakaryocytes, osteoblasts, coronary muscle and erythroid cells. Weakly expressed in peripheral blood leukocytes and macrophag…
Q14118	DAG1_HUMAN	Dystroglycan (Dystrophin-associated glycoprotein 1) [Cleaved into: Alpha-dystroglycan (Alpha-DG); Beta-dystroglycan (Beta-DG)]	34000	4.53148	Alpha-dystroglycan: Secreted, extracellular space.; Beta-dystroglycan: Cell membrane; Single-pass type I membrane protein. Cytoplasm, cytoskeleton. Nucleus, nucleoplasm. Cell membrane, sarcolemma Cell junction, synapse, postsynaptic cell membrane Note=The monomeric form translocates to the nucleus via the action of importins and depends on RAN. Nuclear transport is inhibited by Tyr-892 phosphoryl…	Expressed in a variety of fetal and adult tissues. In epidermal tissue, located to the basement membrane. Also expressed in keratinocytes and fibroblasts.
Q15942	ZYX_HUMAN	Zyxin (Zyxin-2)	33000	4.51851	Cytoplasm. Cytoplasm, cytoskeleton. Nucleus. Cell junction, focal adhesion. Note=Associates with the actin cytoskeleton near the adhesion plaques. Enters the nucleus in the presence of HESX1.
P78417	GSTO1_HUMAN	Glutathione S-transferase omega-1 (GSTO-1) (EC 2.5.1.18) (Glutathione S-transferase omega 1-1) (GSTO 1-1) (Glutathione-dependent dehydroascorbate reductase) (EC 1.8.5.1) (Monomethylarsonic acid reductase) (MMA(V) reductase) (EC 1.20.4.2) (S-(Phenacyl)glutathione reductase) (SPG-R)	33000	4.51851	Cytoplasm, cytosol	Ubiquitous. Highest expression in liver, pancreas, skeletal muscle, spleen, thymus, colon, blood leukocyte and heart. Lowest expression in brain, placenta and lung.
P07858	CATB_HUMAN	Cathepsin B (EC 3.4.22.1) (APP secretase) (APPS) (Cathepsin B1) [Cleaved into: Cathepsin B light chain; Cathepsin B heavy chain]	32400	4.51055	Lysosome Melanosome Secreted, extracellular space Note=Identified by mass spectrometry in melanosome fractions from stage I to stage IV.	Expressed in the stratum spinosum of the epidermis. Weak expression is detected in the stratum granulosum.
P30101	PDIA3_HUMAN	Protein disulfide-isomerase A3 (EC 5.3.4.1) (58 kDa glucose-regulated protein) (58 kDa microsomal protein) (p58) (Disulfide isomerase ER-60) (Endoplasmic reticulum resident protein 57) (ER protein 57) (ERp57) (Endoplasmic reticulum resident protein 60) (ER protein 60) (ERp60)	32000	4.50515	Endoplasmic reticulum Endoplasmic reticulum lumen Melanosome Note=Identified by mass spectrometry in melanosome fractions from stage I to stage IV (PubMed:12643545).	Detected in the flagellum and head region of spermatozoa (at protein level).
Q86UX7	URP2_HUMAN	Fermitin family homolog 3 (Kindlin-3) (MIG2-like protein) (Unc-112-related protein 2)	32000	4.50515	Cell projection, podosome Note=Present in the F-actin surrounding ring structure of podosomes, which are specialized adhesion structures of hematopoietic cells.	Highly expressed in lymph node. Expressed in thymus, spleen and leukocytes. Weakly expressed in placenta, small intestine, stomach, testis and lung. Overexpressed in B-cell malignancies.
Q9H1U4	MEGF9_HUMAN	Multiple epidermal growth factor-like domains protein 9 (Multiple EGF-like domains protein 9) (Epidermal growth factor-like protein 5) (EGF-like protein 5)	32000	4.50515	Membrane ; Single-pass type I membrane protein
P00568	KAD1_HUMAN	Adenylate kinase isoenzyme 1 (AK 1) (EC 2.7.4.3) (EC 2.7.4.6) (ATP-AMP transphosphorylase 1) (ATP:AMP phosphotransferase) (Adenylate monophosphate kinase) (Myokinase)	32000	4.50515	Cytoplasm.
P49747	COMP_HUMAN	Cartilage oligomeric matrix protein (COMP) (Thrombospondin-5) (TSP5)	31250	4.49485	Secreted, extracellular space, extracellular matrix.	Abundantly expressed in the chondrocyte extracellular matrix, and is also found in bone, tendon, ligament and synovium and blood vessels. Increased amounts are produced during late stages of osteoarthritis in the area adjacent to the main defect.
Q99941	ATF6B_HUMAN	Cyclic AMP-dependent transcription factor ATF-6 beta (cAMP-dependent transcription factor ATF-6 beta) (Activating transcription factor 6 beta) (ATF6-beta) (Protein G13) (cAMP response element-binding protein-related protein) (Creb-rp) (cAMP-responsive element-binding protein-like 1) [Cleaved into: Processed cyclic AMP-dependent transcription factor ATF-6 beta]	31000	4.49136	Endoplasmic reticulum membrane; Single-pass type II membrane protein.; Processed cyclic AMP-dependent transcription factor ATF-6 beta: Nucleus. Note=Under ER stress the cleaved N-terminal cytoplasmic domain translocates into the nucleus.	Ubiquitous.
Q9BWP8	COL11_HUMAN	Collectin-11 (Collectin kidney protein 1) (CL-K1)	30000	4.47712	Secreted	Ubiquitous (PubMed:17179669). Detected in adrenal gland, kidney, liver, ovaries and testis (at protein level) (PubMed:20956340).
P52209	6PGD_HUMAN	6-phosphogluconate dehydrogenase, decarboxylating (EC 1.1.1.44)	29000	4.4624	Cytoplasm
Q9BU40	CRDL1_HUMAN	Chordin-like protein 1 (Neuralin-1) (Neurogenesin-1) (Ventroptin)	28000	4.44716	Secreted	Expressed in the developing cornea and in the eye anterior segment in addition to the retina. Differentially expressed in the fetal brain. There is high expression in cerebellum and neocortex. Expressed in retinal pericytes.
P04222	1C03_HUMAN	HLA class I histocompatibility antigen, Cw-3 alpha chain (MHC class I antigen Cw*3)	28000	4.44716	Membrane; Single-pass type I membrane protein.
Q6UVK1	CSPG4_HUMAN	Chondroitin sulfate proteoglycan 4 (Chondroitin sulfate proteoglycan NG2) (Melanoma chondroitin sulfate proteoglycan) (Melanoma-associated chondroitin sulfate proteoglycan)	28000	4.44716	Cell membrane ; Single-pass type I membrane protein ; Extracellular side Apical cell membrane ; Single-pass type I membrane protein ; Extracellular side Cell projection, lamellipodium membrane ; Single-pass type I membrane protein ; Extracellular side Cell surface Note=Localized at the apical plasma membrane it relocalizes to the lamellipodia of astrocytoma upon phosphorylation by PRKCA. Localize…	Detected only in malignant melanoma cells.
Q9UBG0	MRC2_HUMAN	C-type mannose receptor 2 (C-type lectin domain family 13 member E) (Endocytic receptor 180) (Macrophage mannose receptor 2) (Urokinase-type plasminogen activator receptor-associated protein) (UPAR-associated protein) (Urokinase receptor-associated protein) (CD antigen CD280)	28000	4.44716	Membrane; Single-pass type I membrane protein.	Ubiquitous with low expression in brain, placenta, lung, kidney, pancreas, spleen, thymus and colon. Expressed in endothelial cells, fibroblasts and macrophages. Highly expressed in fetal lung and kidney.
Q9H8J5	MANS1_HUMAN	MANSC domain-containing protein 1 (Loss of heterozygosity 12 chromosomal region 3 protein)	28000	4.44716	Membrane ; Single-pass type I membrane protein	Widely expressed.
P02792	FRIL_HUMAN	Ferritin light chain (Ferritin L subunit)	27333.3	4.43669
Q9NQ79	CRAC1_HUMAN	Cartilage acidic protein 1 (68 kDa chondrocyte-expressed protein) (CEP-68) (ASPIC)	27000	4.43136	Secreted, extracellular space, extracellular matrix	Expressed in the interterritorial matrix of articular deep zone cartilage (at protein level). Isoform 1 and isoform 2 are expressed in brain. Isoform 1 is detected in lung and chondrocytes. Detected in cartilage, bone, cultured chondrocytes and lung, and at low levels in heart. Not detected in osteoblasts.
Q14574	DSC3_HUMAN	Desmocollin-3 (Cadherin family member 3) (Desmocollin-4) (HT-CP)	27000	4.43136	Cell membrane; Single-pass type I membrane protein. Cell junction, desmosome.	Epidermis, buccal mucosa, esophagus and cervix.
Q01518	CAP1_HUMAN	Adenylyl cyclase-associated protein 1 (CAP 1)	27000	4.43136	Cell membrane ; Peripheral membrane protein
Q9HCU0	CD248_HUMAN	Endosialin (Tumor endothelial marker 1) (CD antigen CD248)	27000	4.43136	Membrane ; Single-pass type I membrane protein	Expressed in tumor endothelial cells but absent or barely detectable in normal endothelial cells. Expressed in metastatic lesions of the liver and during angiogenesis of corpus luteum formation and wound healing. Expressed in vascular endothelial cells of malignant tumors but not in normal blood vessels. Expressed in stromal fibroblasts.
O75594	PGRP1_HUMAN	Peptidoglycan recognition protein 1 (Peptidoglycan recognition protein short) (PGRP-S)	26000	4.41497	Secreted Cytoplasmic granule	Highly expressed in bone marrow. Weak expression found in kidney, liver, small intestine, spleen, thymus, peripheral leukocyte, lung, fetal spleen and neutrophils.
P11717	MPRI_HUMAN	Cation-independent mannose-6-phosphate receptor (CI Man-6-P receptor) (CI-MPR) (M6PR) (300 kDa mannose 6-phosphate receptor) (MPR 300) (Insulin-like growth factor 2 receptor) (Insulin-like growth factor II receptor) (IGF-II receptor) (M6P/IGF2 receptor) (M6P/IGF2R) (CD antigen CD222)	26000	4.41497	Lysosome membrane ; Single-pass type I membrane protein Note=Colocalized with DPP4 in internalized cytoplasmic vesicles adjacent to the cell surface.
P30041	PRDX6_HUMAN	Peroxiredoxin-6 (EC 1.11.1.15) (1-Cys peroxiredoxin) (1-Cys PRX) (24 kDa protein) (Acidic calcium-independent phospholipase A2) (aiPLA2) (EC 3.1.1.4) (Antioxidant protein 2) (Liver 2D page spot 40) (Non-selenium glutathione peroxidase) (NSGPx) (Red blood cells page spot 12)	25000	4.39794	Cytoplasm Lysosome Note=Also found in lung secretory organelles (lamellar bodies).
P43121	MUC18_HUMAN	Cell surface glycoprotein MUC18 (Cell surface glycoprotein P1H12) (Melanoma cell adhesion molecule) (Melanoma-associated antigen A32) (Melanoma-associated antigen MUC18) (S-endo 1 endothelial-associated antigen) (CD antigen CD146)	25000	4.39794	Membrane; Single-pass type I membrane protein.	Detected in endothelial cells in vascular tissue throughout the body. May appear at the surface of neural crest cells during their embryonic migration. Appears to be limited to vascular smooth muscle in normal adult tissues. Associated with tumor progression and the development of metastasis in human malignant melanoma. Expressed most strongly on metastatic lesions and advanced primary tumors and…
P17813	EGLN_HUMAN	Endoglin (CD antigen CD105)	24966.7	4.39736	Cell membrane ; Single-pass type I membrane protein	Detected on umbilical veil endothelial cells (PubMed:10625079). Detected in placenta (at protein level) (PubMed:1692830). Detected on endothelial cells (PubMed:1692830).
P07333	CSF1R_HUMAN	Macrophage colony-stimulating factor 1 receptor (CSF-1 receptor) (CSF-1-R) (CSF-1R) (M-CSF-R) (EC 2.7.10.1) (Proto-oncogene c-Fms) (CD antigen CD115)	24000	4.38021	Cell membrane; Single-pass type I membrane protein.	Expressed in bone marrow and in differentiated blood mononuclear cells.
Q9UEW3	MARCO_HUMAN	Macrophage receptor MARCO (Macrophage receptor with collagenous structure) (Scavenger receptor class A member 2)	24000	4.38021	Cell membrane ; Single-pass type II membrane protein	Expressed in alveolar macrophages (at protein level). Detected in macrophages from various tissues including thymus, kidney, Kupffer cells of liver, and spleen (PubMed:9468508).
P07237	PDIA1_HUMAN	Protein disulfide-isomerase (PDI) (EC 5.3.4.1) (Cellular thyroid hormone-binding protein) (Prolyl 4-hydroxylase subunit beta) (p55)	23000	4.36173	Endoplasmic reticulum Endoplasmic reticulum lumen Melanosome Cell membrane ; Peripheral membrane protein Note=Highly abundant. In some cell types, seems to be also secreted or associated with the plasma membrane, where it undergoes constant shedding and replacement from intracellular sources (Probable). Localizes near CD4-enriched regions on lymphoid cell surfaces (PubMed:11181151). Identified by…
P15151	PVR_HUMAN	Poliovirus receptor (Nectin-like protein 5) (NECL-5) (CD antigen CD155)	23000	4.36173	Isoform Alpha: Cell membrane; Single-pass type I membrane protein.; Isoform Delta: Cell membrane; Single-pass type I membrane protein.; Isoform Beta: Secreted.; Isoform Gamma: Secreted.
Q99497	PARK7_HUMAN	Protein/nucleic acid deglycase DJ-1 (EC 3.1.2.-) (EC 3.5.1.-) (EC 3.5.1.124) (Maillard deglycase) (Oncogene DJ1) (Parkinson disease protein 7) (Parkinsonism-associated deglycase) (Protein DJ-1) (DJ-1)	23000	4.36173	Cell membrane ; Lipid-anchor Cytoplasm Nucleus Membrane raft Mitochondrion Note=Under normal conditions, located predominantly in the cytoplasm and, to a lesser extent, in the nucleus and mitochondrion. Translocates to the mitochondrion and subsequently to the nucleus in response to oxidative stress and exerts an increased cytoprotective effect against oxidative damage (PubMed:18711745). Detected…	Highly expressed in pancreas, kidney, skeletal muscle, liver, testis and heart. Detected at slightly lower levels in placenta and brain (at protein level). Detected in astrocytes, Sertoli cells, spermatogonia, spermatids and spermatozoa. Expressed by pancreatic islets at higher levels than surrounding exocrine tissues (PubMed:22611253).
P03973	SLPI_HUMAN	Antileukoproteinase (ALP) (BLPI) (HUSI-1) (Mucus proteinase inhibitor) (MPI) (Protease inhibitor WAP4) (Secretory leukocyte protease inhibitor) (Seminal proteinase inhibitor) (WAP four-disulfide core domain protein 4)	22500	4.35218	Secreted	Detected in blood plasma (PubMed:24352879). Detected in bone marrow myeloid cells (PubMed:24352879). Detected in airway sputum (PubMed:2039600). Detected in parotid gland secretions (PubMed:3462719). Detected in seminal plasma (at protein level) (PubMed:3485543). Detected in uterus cervix (PubMed:3533531).
O00299	CLIC1_HUMAN	Chloride intracellular channel protein 1 (Chloride channel ABP) (Nuclear chloride ion channel 27) (NCC27) (Regulatory nuclear chloride ion channel protein) (hRNCC)	22000	4.34242	Nucleus Nucleus membrane ; Single-pass membrane protein Cytoplasm Cell membrane ; Single-pass membrane protein Note=Mostly in the nucleus including in the nuclear membrane (PubMed:9139710, PubMed:12681486). Small amount in the cytoplasm and the plasma membrane (PubMed:9139710). Exists both as soluble cytoplasmic protein and as membrane protein with probably a single transmembrane domain (PubMed:1…	Expression is prominent in heart, placenta, liver, kidney and pancreas.
P05106	ITB3_HUMAN	Integrin beta-3 (Platelet membrane glycoprotein IIIa) (GPIIIa) (CD antigen CD61)	21000	4.32222	Cell membrane ; Single-pass type I membrane protein Cell projection, lamellipodium membrane Cell junction, focal adhesion	Isoform beta-3A and isoform beta-3C are widely expressed. Isoform beta-3A is specifically expressed in osteoblast cells; isoform beta-3C is specifically expressed in prostate and testis.
Q10588	BST1_HUMAN	ADP-ribosyl cyclase/cyclic ADP-ribose hydrolase 2 (EC 3.2.2.6) (ADP-ribosyl cyclase 2) (Bone marrow stromal antigen 1) (BST-1) (Cyclic ADP-ribose hydrolase 2) (cADPr hydrolase 2) (CD antigen CD157)	20000	4.30103	Cell membrane; Lipid-anchor, GPI-anchor.	Widely expressed.
P09104	ENOG_HUMAN	Gamma-enolase (EC 4.2.1.11) (2-phospho-D-glycerate hydro-lyase) (Enolase 2) (Neural enolase) (Neuron-specific enolase) (NSE)	19750	4.29557	Cytoplasm Cell membrane Note=Can translocate to the plasma membrane in either the homodimeric (alpha/alpha) or heterodimeric (alpha/gamma) form.	The alpha/alpha homodimer is expressed in embryo and in most adult tissues. The alpha/beta heterodimer and the beta/beta homodimer are found in striated muscle, and the alpha/gamma heterodimer and the gamma/gamma homodimer in neurons.
P24043	LAMA2_HUMAN	Laminin subunit alpha-2 (Laminin M chain) (Laminin-12 subunit alpha) (Laminin-2 subunit alpha) (Laminin-4 subunit alpha) (Merosin heavy chain)	19000	4.27875	Secreted, extracellular space, extracellular matrix, basement membrane. Note=Major component.	Placenta, striated muscle, peripheral nerve, cardiac muscle, pancreas, lung, spleen, kidney, adrenal gland, skin, testis, meninges, choroid plexus, and some other regions of the brain; not in liver, thymus and bone.
P07359	GP1BA_HUMAN	Platelet glycoprotein Ib alpha chain (GP-Ib alpha) (GPIb-alpha) (GPIbA) (Glycoprotein Ibalpha) (Antigen CD42b-alpha) (CD antigen CD42b) [Cleaved into: Glycocalicin]	18000	4.25527	Membrane; Single-pass type I membrane protein.
P05067	A4_HUMAN	Amyloid-beta precursor protein (APP) (ABPP) (APPI) (Alzheimer disease amyloid protein) (Amyloid precursor protein) (Amyloid-beta A4 protein) (Cerebral vascular amyloid peptide) (CVAP) (PreA4) (Protease nexin-II) (PN-II) [Cleaved into: N-APP; Soluble APP-alpha (S-APP-alpha); Soluble APP-beta (S-APP-beta); C99 (Beta-secretase C-terminal fragment) (Beta-CTF); Amyloid-beta protein 42 (Abeta42) (Beta-…	18000	4.25527	Cell membrane ; Single-pass type I membrane protein Membrane ; Single-pass type I membrane protein Perikaryon Cell projection, growth cone Membrane, clathrin-coated pit Early endosome Cytoplasmic vesicle Note=Cell surface protein that rapidly becomes internalized via clathrin-coated pits. Only a minor proportion is present at the cell membrane; most of the protein is present in intracellular vesi…	Expressed in all fetal tissues examined with highest levels in brain, kidney, heart and spleen. Weak expression in liver. In adult brain, highest expression found in the frontal lobe of the cortex and in the anterior perisylvian cortex-opercular gyri. Moderate expression in the cerebellar cortex, the posterior perisylvian cortex-opercular gyri and the temporal associated cortex. Weak expression f…
Q96EE4	CC126_HUMAN	Coiled-coil domain-containing protein 126	18000	4.25527	Secreted
Q13418	ILK_HUMAN	Integrin-linked protein kinase (EC 2.7.11.1) (59 kDa serine/threonine-protein kinase) (ILK-1) (ILK-2) (p59ILK)	17000	4.23045	Cell junction, focal adhesion Cell membrane; Peripheral membrane protein; Cytoplasmic side Cell projection, lamellipodium Cytoplasm, myofibril, sarcomere	Highly expressed in heart followed by skeletal muscle, pancreas and kidney. Weakly expressed in placenta, lung and liver.
P07711	CATL1_HUMAN	Cathepsin L1 (EC 3.4.22.15) (Cathepsin L) (Major excreted protein) (MEP) [Cleaved into: Cathepsin L1 heavy chain; Cathepsin L1 light chain]	17000	4.23045	Lysosome.
Q9UNW1	MINP1_HUMAN	Multiple inositol polyphosphate phosphatase 1 (EC 3.1.3.62) (2,3-bisphosphoglycerate 3-phosphatase) (2,3-BPG phosphatase) (EC 3.1.3.80) (Inositol (1,3,4,5)-tetrakisphosphate 3-phosphatase) (Ins(1,3,4,5)P(4) 3-phosphatase)	16000	4.20412	Endoplasmic reticulum lumen	Widely expressed with highest levels in kidney, liver and placenta.
P20774	MIME_HUMAN	Mimecan (Osteoglycin) (Osteoinductive factor) (OIF)	16000	4.20412	Secreted, extracellular space, extracellular matrix	Bone.
Q15063	POSTN_HUMAN	Periostin (PN) (Osteoblast-specific factor 2) (OSF-2)	16000	4.20412	Golgi apparatus Secreted Secreted, extracellular space, extracellular matrix Note=Colocalizes with BMP1 in the Golgi.	Widely expressed with highest levels in aorta, stomach, lower gastrointestinal tract, placenta, uterus, thyroid tissue and breast. Up-regulated in epithelial ovarian tumors. Not expressed in normal ovaries. Also highly expressed at the tumor periphery of lung carcinoma tissue but not within the tumor. Overexpressed in breast cancers.
Q96HD1	CREL1_HUMAN	Cysteine-rich with EGF-like domain protein 1	16000	4.20412	Membrane ; Multi-pass membrane protein	Highly expressed in fetal lung, liver, kidney, adult heart, brain and skeletal muscle. Weakly expressed in placenta, fetal brain, and adult lung, liver, kidney and pancreas.
P08123	CO1A2_HUMAN	Collagen alpha-2(I) chain (Alpha-2 type I collagen)	15000	4.17609	Secreted, extracellular space, extracellular matrix	Forms the fibrils of tendon, ligaments and bones. In bones the fibrils are mineralized with calcium hydroxyapatite.
P54289	CA2D1_HUMAN	Voltage-dependent calcium channel subunit alpha-2/delta-1 (Voltage-gated calcium channel subunit alpha-2/delta-1) [Cleaved into: Voltage-dependent calcium channel subunit alpha-2-1; Voltage-dependent calcium channel subunit delta-1]	15000	4.17609	Membrane ; Single-pass type I membrane protein	Isoform 1 is expressed in skeletal muscle. Isoform 2 is expressed in the central nervous system. Isoform 2, isoform 4 and isoform 5 are expressed in neuroblastoma cells. Isoform 3, isoform 4 and isoform 5 are expressed in the aorta.
P14314	GLU2B_HUMAN	Glucosidase 2 subunit beta (80K-H protein) (Glucosidase II subunit beta) (Protein kinase C substrate 60.1 kDa protein heavy chain) (PKCSH)	15000	4.17609	Endoplasmic reticulum
Q9UBP4	DKK3_HUMAN	Dickkopf-related protein 3 (Dickkopf-3) (Dkk-3) (hDkk-3)	15000	4.17609	Secreted.	Highest expression in heart, brain, and spinal cord.
P37837	TALDO_HUMAN	Transaldolase (EC 2.2.1.2)	15000	4.17609	Cytoplasm
P20908	CO5A1_HUMAN	Collagen alpha-1(V) chain	15000	4.17609	Secreted, extracellular space, extracellular matrix
Q8TER0	SNED1_HUMAN	Sushi, nidogen and EGF-like domain-containing protein 1 (Insulin-responsive sequence DNA-binding protein 1) (IRE-BP1)	15000	4.17609	Secreted
O00533	NCHL1_HUMAN	Neural cell adhesion molecule L1-like protein (Close homolog of L1) [Cleaved into: Processed neural cell adhesion molecule L1-like protein]	14000	4.14613	Cell membrane ; Single-pass type I membrane protein Note=Soluble forms produced by cleavage/shedding also exist.; Processed neural cell adhesion molecule L1-like protein: Secreted, extracellular space, extracellular matrix	Expressed in the fetal and adult brain as well as in Schwann cell culture. Also detected in adult peripheral tissues.
Q12860	CNTN1_HUMAN	Contactin-1 (Glycoprotein gp135) (Neural cell surface protein F3)	14000	4.14613	Isoform 1: Cell membrane; Lipid-anchor, GPI-anchor; Extracellular side.; Isoform 2: Cell membrane; Lipid-anchor, GPI-anchor; Extracellular side.	Strongly expressed in brain and in neuroblastoma and retinoblastoma cell lines. Lower levels of expression in lung, pancreas, kidney and skeletal muscle.
P40967	PMEL_HUMAN	Melanocyte protein PMEL (ME20-M) (ME20M) (Melanocyte protein Pmel 17) (Melanocytes lineage-specific antigen GP100) (Melanoma-associated ME20 antigen) (P1) (P100) (Premelanosome protein) (Silver locus protein homolog) [Cleaved into: M-alpha (95 kDa melanocyte-specific secreted glycoprotein) (P26) (Secreted melanoma-associated ME20 antigen) (ME20-S) (ME20S); M-beta]	14000	4.14613	Endoplasmic reticulum membrane; Single-pass type I membrane protein. Golgi apparatus. Melanosome. Endosome, multivesicular body. Note=Identified by mass spectrometry in melanosome fractions from stage I to stage IV. Localizes predominantly to intralumenal vesicles (ILVs) within multivesicular bodies. Associates with ILVs found within the lumen of premelanosomes and melanosomes and particularly in…	Preferentially expressed in melanomas. Some expression was found in dysplastic nevi. Not found in normal tissues nor in carcinomas. Normally expressed at low levels in quiescent adult melanocytes but overexpressed by proliferating neonatal melanocytes and during tumor growth.
O14786	NRP1_HUMAN	Neuropilin-1 (Vascular endothelial cell growth factor 165 receptor) (CD antigen CD304)	13000	4.11394	Cell membrane; Single-pass type I membrane protein.; Isoform 2: Secreted.	The expression of isoforms 1 and 2 does not seem to overlap. Isoform 1 is expressed by the blood vessels of different tissues. In the developing embryo it is found predominantly in the nervous system. In adult tissues, it is highly expressed in heart and placenta; moderately in lung, liver, skeletal muscle, kidney and pancreas; and low in adult brain. Isoform 2 is found in liver hepatocytes, kidn…
P55103	INHBC_HUMAN	Inhibin beta C chain (Activin beta-C chain)	13000	4.11394	Secreted	Expressed in benign prostatic hyperplasia.
P49257	LMAN1_HUMAN	Protein ERGIC-53 (ER-Golgi intermediate compartment 53 kDa protein) (Gp58) (Intracellular mannose-specific lectin MR60) (Lectin mannose-binding 1)	13000	4.11394	Endoplasmic reticulum-Golgi intermediate compartment membrane; Single-pass type I membrane protein. Golgi apparatus membrane; Single-pass membrane protein. Endoplasmic reticulum membrane; Single-pass type I membrane protein.	Ubiquitous.
Q8IZF2	AGRF5_HUMAN	Adhesion G protein-coupled receptor F5 (G-protein coupled receptor 116)	12000	4.07918	Cell membrane ; Multi-pass membrane protein
Q9Y5C1	ANGL3_HUMAN	Angiopoietin-related protein 3 (Angiopoietin-5) (ANG-5) (Angiopoietin-like protein 3) [Cleaved into: ANGPTL3(17-221); ANGPTL3(17-224)]	12000	4.07918	Secreted Cell projection, lamellipodium Note=Colocalized with HSPG2 and activated ITGB3 on podocytes.	Expressed principally in liver. Weakly expressed in kidney. Binds to adipocytes. Increased expression and colocalization with activated ITGB3 in glomeruli of patients with nephrotic syndrome showing effaced podocyte foot processes (at protein level).
Q9UBR2	CATZ_HUMAN	Cathepsin Z (EC 3.4.18.1) (Cathepsin P) (Cathepsin X)	12000	4.07918	Lysosome.	Widely expressed.
Q13231	CHIT1_HUMAN	Chitotriosidase-1 (EC 3.2.1.14) (Chitinase-1)	12000	4.07918	Secreted. Lysosome. Note=A small proportion is lysosomal.	Detected in spleen. Secreted by cultured macrophages.
Q99972	MYOC_HUMAN	Myocilin (Myocilin 55 kDa subunit) (Trabecular meshwork-induced glucocorticoid response protein) [Cleaved into: Myocilin, N-terminal fragment (Myocilin 20 kDa N-terminal fragment); Myocilin, C-terminal fragment (Myocilin 35 kDa N-terminal fragment)]	12000	4.07918	Secreted Golgi apparatus Cytoplasmic vesicle Secreted, extracellular space. Secreted, extracellular space, extracellular matrix Secreted, exosome Mitochondrion Mitochondrion intermembrane space Mitochondrion inner membrane Mitochondrion outer membrane Rough endoplasmic reticulum Cell projection. Cell projection, cilium Note=Located preferentially in the ciliary rootlet and basal body of the conne…	Detected in aqueous humor (PubMed:12697062). Detected in the eye (at protein level) (PubMed:11431441). Widely expressed. Highly expressed in various types of muscle, ciliary body, papillary sphincter, skeletal muscle, heart, and bone marrow-derived mesenchymal stem cells. Expressed predominantly in the retina. In normal eyes, found in the inner uveal meshwork region and the anterior portion of th…
P35968	VGFR2_HUMAN	Vascular endothelial growth factor receptor 2 (VEGFR-2) (EC 2.7.10.1) (Fetal liver kinase 1) (FLK-1) (Kinase insert domain receptor) (KDR) (Protein-tyrosine kinase receptor flk-1) (CD antigen CD309)	11500	4.0607	Cell junction Endoplasmic reticulum Note=Localized with RAP1A at cell-cell junctions (By similarity). Colocalizes with ERN1 and XBP1 in the endoplasmic reticulum in endothelial cells in a vascular endothelial growth factor (VEGF)-dependent manner (PubMed:23529610).; Isoform 1: Cell membrane; Single-pass type I membrane protein. Cytoplasm. Nucleus. Cytoplasmic vesicle. Early endosome. Note=Detecte…	Detected in cornea (at protein level). Widely expressed.
Q9BXR6	FHR5_HUMAN	Complement factor H-related protein 5 (FHR-5)	11000	4.04139	Secreted.	Expressed by the liver and secreted in plasma.
P05556	ITB1_HUMAN	Integrin beta-1 (Fibronectin receptor subunit beta) (Glycoprotein IIa) (GPIIA) (VLA-4 subunit beta) (CD antigen CD29)	11000	4.04139	Cell membrane ; Single-pass type I membrane protein Cell projection, invadopodium membrane ; Single-pass type I membrane protein Cell projection, ruffle membrane ; Single-pass type I membrane protein Recycling endosome Melanosome Cleavage furrow Cell projection, lamellipodium Cell projection, ruffle Cell junction, focal adhesion Cell surface Note=Isoform 2 does not localize to focal adhesions. Hi…	Isoform 1 is widely expressed, other isoforms are generally coexpressed with a more restricted distribution. Isoform 2 is expressed in skin, liver, skeletal muscle, cardiac muscle, placenta, umbilical vein endothelial cells, neuroblastoma cells, lymphoma cells, hepatoma cells and astrocytoma cells. Isoform 3 and isoform 4 are expressed in muscle, kidney, liver, placenta, cervical epithelium, umbi…
Q7Z7G0	TARSH_HUMAN	Target of Nesh-SH3 (Tarsh) (ABI gene family member 3-binding protein) (Nesh-binding protein) (NeshBP)	11000	4.04139	Secreted	Expressed in brain, heart, lung, liver, pancreas kidney and placenta.
P58166	INHBE_HUMAN	Inhibin beta E chain (Activin beta-E chain)	11000	4.04139	Secreted
P52566	GDIR2_HUMAN	Rho GDP-dissociation inhibitor 2 (Rho GDI 2) (Ly-GDI) (Rho-GDI beta)	10000	4	Cytoplasm, cytosol	Detected in bone marrow, thymus and spleen.
Q9UQE7	SMC3_HUMAN	Structural maintenance of chromosomes protein 3 (SMC protein 3) (SMC-3) (Basement membrane-associated chondroitin proteoglycan) (Bamacan) (Chondroitin sulfate proteoglycan 6) (Chromosome-associated polypeptide) (hCAP)	10000	4	Nucleus Chromosome Chromosome, centromere Note=Associates with chromatin. Before prophase it is scattered along chromosome arms. During prophase, most of cohesin complexes dissociate from chromatin probably because of phosphorylation by PLK, except at centromeres, where cohesin complexes remain. At anaphase, the RAD21 subunit of the cohesin complex is cleaved, leading to the dissociation of the c…
Q12913	PTPRJ_HUMAN	Receptor-type tyrosine-protein phosphatase eta (Protein-tyrosine phosphatase eta) (R-PTP-eta) (EC 3.1.3.48) (Density-enhanced phosphatase 1) (DEP-1) (HPTP eta) (Protein-tyrosine phosphatase receptor type J) (R-PTP-J) (CD antigen CD148)	9900	3.99564	Cell membrane; Single-pass type I membrane protein. Cell projection, ruffle membrane Cell junction. Note=After T-cell stimulation, it is temporarily excluded from immunological synapses.	Expressed in the promyelocytic cell line HL-60, the granulocyte-macrophage colony-stimulating factor-dependent leukemic cell line F-36P, and the IL3 and erythropoietin-dependent leukemic cell line F-36E. Expressed predominantly in epithelial cells and lymphocytes. Enhanced expression at high cell density.
P07738	PMGE_HUMAN	Bisphosphoglycerate mutase (BPGM) (EC 5.4.2.4) (2,3-bisphosphoglycerate mutase, erythrocyte) (2,3-bisphosphoglycerate synthase) (EC 5.4.2.11) (2,3-diphosphoglycerate mutase) (DPGM) (BPG-dependent PGAM)	9800	3.99123		Expressed in red blood cells. Expressed in non-erythroid cells of the placenta; present in the syncytiotrophoblast layer of the placental villi at the feto-maternal interface (at protein level).
Q8NBJ4	GOLM1_HUMAN	Golgi membrane protein 1 (Golgi membrane protein GP73) (Golgi phosphoprotein 2)	9200	3.96379	Golgi apparatus, cis-Golgi network membrane ; Single-pass type II membrane protein Note=Early Golgi. Cycles via the cell surface and endosomes upon lumenal pH disruption.	Widely expressed. Highly expressed in colon, prostate, trachea and stomach. Expressed at lower level in testis, muscle, lymphoid tissues, white blood cells and spleen. Predominantly expressed by cells of the epithelial lineage. Expressed at low level in normal liver. Expression significantly increases in virus (HBV, HCV) infected liver. Expression does not increase in liver disease due to non-vir…
P46531	NOTC1_HUMAN	Neurogenic locus notch homolog protein 1 (Notch 1) (hN1) (Translocation-associated notch protein TAN-1) [Cleaved into: Notch 1 extracellular truncation (NEXT); Notch 1 intracellular domain (NICD)]	8100	3.90849	Cell membrane ; Single-pass type I membrane protein; Notch 1 intracellular domain: Nucleus Note=Following proteolytical processing NICD is translocated to the nucleus. Nuclear location may require MEGF10.	In fetal tissues most abundant in spleen, brain stem and lung. Also present in most adult tissues where it is found mainly in lymphoid tissues.
O94985	CSTN1_HUMAN	Calsyntenin-1 (Alcadein-alpha) (Alc-alpha) (Alzheimer-related cadherin-like protein) (Non-classical cadherin XB31alpha) [Cleaved into: Soluble Alc-alpha (SAlc-alpha); CTF1-alpha (C-terminal fragment 1-alpha)]	7900	3.89763	Endoplasmic reticulum membrane ; Single-pass type I membrane protein Golgi apparatus membrane Cell projection Cell junction, synapse, postsynaptic cell membrane ; Single-pass type I membrane protein Nucleus Note=Neurite tips. Localized in the postsynaptic membrane of both excitatory and inhibitory synapses (By similarity). The AlcICD fragment is translocated to the nucleus upon interaction with A…	Expressed in the brain and, a lower level, in the heart, skeletal muscle, kidney and placenta. Accumulates in dystrophic neurites around the amyloid core of Alzheimer disease senile plaques (at protein level).
Q14314	FGL2_HUMAN	Fibroleukin (Fibrinogen-like protein 2) (pT49)	7500	3.87506	Secreted.	Constitutively expressed in cytotoxic T-cells.
O75347	TBCA_HUMAN	Tubulin-specific chaperone A (TCP1-chaperonin cofactor A) (Tubulin-folding cofactor A) (CFA)	7400	3.86923	Cytoplasm, cytoskeleton.
P13473	LAMP2_HUMAN	Lysosome-associated membrane glycoprotein 2 (LAMP-2) (Lysosome-associated membrane protein 2) (CD107 antigen-like family member B) (LGP-96) (CD antigen CD107b)	7300	3.86332	Cell membrane ; Single-pass type I membrane protein Endosome membrane ; Single-pass type I membrane protein Lysosome membrane ; Single-pass type I membrane protein Cytoplasmic vesicle, autophagosome membrane Note=This protein shuttles between lysosomes, endosomes, and the plasma membrane.	Isoform LAMP-2A is highly expressed in placenta, lung and liver, less in kidney and pancreas, low in brain and skeletal muscle (PubMed:7488019, PubMed:26856698). Isoform LAMP-2B is detected in spleen, thymus, prostate, testis, small intestine, colon, skeletal muscle, brain, placenta, lung, kidney, ovary and pancreas and liver (PubMed:7488019, PubMed:26856698). Isoform LAMP-2C is detected in small…
Q13201	MMRN1_HUMAN	Multimerin-1 (EMILIN-4) (Elastin microfibril interface located protein 4) (Elastin microfibril interfacer 4) (Endothelial cell multimerin) [Cleaved into: Platelet glycoprotein Ia*; 155 kDa platelet multimerin (p-155) (p155)]	7200	3.85733	Secreted	Synthesized by endothelial cells and megakaryocytes. Stored in platelet alpha granules and endothelial cell Weibel-Palade bodies, following activation of these cells, it is released and attached to megakaryocytes, platelets, endothelium and subendothelium of blood vessels. Not found in plasma. Found in vascular tissues such as placenta, lung, and liver.
P26572	MGAT1_HUMAN	Alpha-1,3-mannosyl-glycoprotein 2-beta-N-acetylglucosaminyltransferase (EC 2.4.1.101) (N-glycosyl-oligosaccharide-glycoprotein N-acetylglucosaminyltransferase I) (GNT-I) (GlcNAc-T I)	7200	3.85733	Golgi apparatus membrane ; Single-pass type II membrane protein
Q9UJJ9	GNPTG_HUMAN	N-acetylglucosamine-1-phosphotransferase subunit gamma (GlcNAc-1-phosphotransferase subunit gamma) (UDP-N-acetylglucosamine-1-phosphotransferase subunit gamma)	6800	3.83251	Secreted Golgi apparatus	Widely expressed.
Q9ULI3	HEG1_HUMAN	Protein HEG homolog 1	6600	3.81954	Isoform 1: Cell membrane ; Single-pass type I membrane protein Cell junction; Isoform 2: Secreted
Q9H4A9	DPEP2_HUMAN	Dipeptidase 2 (EC 3.4.13.19)	6500	3.81291	Membrane ; Lipid-anchor, GPI-anchor
Q8WWZ8	OIT3_HUMAN	Oncoprotein-induced transcript 3 protein (Liver-specific zona pellucida domain-containing protein)	6400	3.80618	Nucleus envelope Note=Can be secreted into blood.	Liver-specific. Expressed only in the hepatocytes. Down-regulated in hepatocellular carcinoma (HCC) and HCC cell lines.
P13667	PDIA4_HUMAN	Protein disulfide-isomerase A4 (EC 5.3.4.1) (Endoplasmic reticulum resident protein 70) (ER protein 70) (ERp70) (Endoplasmic reticulum resident protein 72) (ER protein 72) (ERp-72) (ERp72)	6400	3.80618	Endoplasmic reticulum lumen Melanosome Note=Identified by mass spectrometry in melanosome fractions from stage I to stage IV (PubMed:17081065).
Q14697	GANAB_HUMAN	Neutral alpha-glucosidase AB (EC 3.2.1.207) (Alpha-glucosidase 2) (Glucosidase II subunit alpha)	6400	3.80618	Endoplasmic reticulum Golgi apparatus Melanosome Note=Identified by mass spectrometry in melanosome fractions from stage I to stage IV.	Detected in placenta (PubMed:3881423). Isoform 1 and isoform 2 are expressed in the kidney and liver (PubMed:27259053).
Q9Y5Y7	LYVE1_HUMAN	Lymphatic vessel endothelial hyaluronic acid receptor 1 (LYVE-1) (Cell surface retention sequence-binding protein 1) (CRSBP-1) (Extracellular link domain-containing protein 1) (Hyaluronic acid receptor)	6200	3.79239	Membrane ; Single-pass type I membrane protein Note=Localized to the plasma membrane and in vesicles near extranuclear membranes which may represent trans-Golgi network (TGN) and endosomes/prelysosomeal compartments. Undergoes ligand-dependent internalization and recycling at the cell surface.	Mainly expressed in endothelial cells lining lymphatic vessels.
P10912	GHR_HUMAN	Growth hormone receptor (GH receptor) (Somatotropin receptor) [Cleaved into: Growth hormone-binding protein (GH-binding protein) (GHBP) (Serum-binding protein)]	5895	3.77048	Cell membrane; Single-pass type I membrane protein. Note=On growth hormone binding, GHR is ubiquitinated, internalized, down-regulated and transported into a degradative or non-degradative pathway.; Isoform 2: Cell membrane; Single-pass type I membrane protein. Note=Remains fixed to the cell membrane and is not internalized.; Growth hormone-binding protein: Secreted. Note=Complexed to a substanti…	Expressed in various tissues with high expression in liver and skeletal muscle. Isoform 4 is predominantly expressed in kidney, bladder, adrenal gland and brain stem. Isoform 1 expression in placenta is predominant in chorion and decidua. Isoform 4 is highly expressed in placental villi. Isoform 2 is expressed in lung, stomach and muscle. Low levels in liver.
P33908	MA1A1_HUMAN	Mannosyl-oligosaccharide 1,2-alpha-mannosidase IA (EC 3.2.1.113) (Man(9)-alpha-mannosidase) (Man9-mannosidase) (Mannosidase alpha class 1A member 1) (Processing alpha-1,2-mannosidase IA) (Alpha-1,2-mannosidase IA)	5600	3.74819	Golgi apparatus membrane; Single-pass type II membrane protein.
P22897	MRC1_HUMAN	Macrophage mannose receptor 1 (MMR) (C-type lectin domain family 13 member D) (C-type lectin domain family 13 member D-like) (Human mannose receptor) (hMR) (Macrophage mannose receptor 1-like protein 1) (CD antigen CD206)	5600	3.74819	Endosome membrane ; Single-pass type I membrane protein Cell membrane ; Single-pass type I membrane protein
P35247	SFTPD_HUMAN	Pulmonary surfactant-associated protein D (PSP-D) (SP-D) (Collectin-7) (Lung surfactant protein D)	5500	3.74036	Secreted, extracellular space, extracellular matrix. Secreted, extracellular space, surface film.	Expressed in lung, brain, pancreas and adipose tissue (mainly mature adipocytes).
Q96NZ9	PRAP1_HUMAN	Proline-rich acidic protein 1 (Epididymis tissue protein Li 178) (Uterine-specific proline-rich acidic protein)	5100	3.70757	Secreted	Abundantly expressed in the epithelial cells of the liver, kidney, gastrointestinal tract and cervix. Significantly down-regulated in hepatocellular carcinoma and right colon adenocarcinoma compared with the respective adjacent normal tissues. Expressed in epididymis (at protein level).
Q9NZ08	ERAP1_HUMAN	Endoplasmic reticulum aminopeptidase 1 (EC 3.4.11.-) (ARTS-1) (Adipocyte-derived leucine aminopeptidase) (A-LAP) (Aminopeptidase PILS) (Puromycin-insensitive leucyl-specific aminopeptidase) (PILS-AP) (Type 1 tumor necrosis factor receptor shedding aminopeptidase regulator)	5100	3.70757	Endoplasmic reticulum membrane ; Single-pass type II membrane protein	Ubiquitous.
O95479	G6PE_HUMAN	GDH/6PGL endoplasmic bifunctional protein [Includes: Glucose 1-dehydrogenase (EC 1.1.1.47) (Glucose-6-phosphate dehydrogenase) (EC 1.1.1.363); 6-phosphogluconolactonase (6PGL) (EC 3.1.1.31)]	4900	3.6902	Endoplasmic reticulum lumen. Note=Microsomes, endoplasmic reticulum lumen.	Present in most tissues examined, strongest in liver.
P23470	PTPRG_HUMAN	Receptor-type tyrosine-protein phosphatase gamma (Protein-tyrosine phosphatase gamma) (R-PTP-gamma) (EC 3.1.3.48)	4900	3.6902	Membrane ; Single-pass type I membrane protein	Found in a variety of tissues.
Q9NPY3	C1QR1_HUMAN	Complement component C1q receptor (C1q/MBL/SPA receptor) (C1qR) (C1qR(p)) (C1qRp) (CDw93) (Complement component 1 q subcomponent receptor 1) (Matrix-remodeling-associated protein 4) (CD antigen CD93)	4800	3.68124	Membrane; Single-pass type I membrane protein.	Highly expressed in endothelial cells, platelets, cells of myeloid origin, such as monocytes and neutrophils. Not expressed in cells of lymphoid origin.
Q9NPH3	IL1AP_HUMAN	Interleukin-1 receptor accessory protein (IL-1 receptor accessory protein) (IL-1RAcP) (Interleukin-1 receptor 3) (IL-1R-3) (IL-1R3)	4700	3.6721	Isoform 1: Cell membrane; Single-pass type I membrane protein.; Isoform 2: Secreted.; Isoform 3: Secreted.	Detected in liver, skin, placenta, thymus and lung. Isoform 4 is predominantly expressed in brain. Overexpressed on candidate chronic myeloid leukemia (CML) stem cells, hematopoietic stem cells and mononuclear cells of patients with acute myeloid leukemia (AML). Overexpressed in patients with chronic obstructive pulmonary disease (COPD). Expressed in T-helper 1 (Th1) and T-helper 2 (Th2) cell sub…
Q9Y6Z7	COL10_HUMAN	Collectin-10 (Collectin liver protein 1) (CL-L1) (Collectin-34) (CL-34)	4700	3.6721	Secreted Golgi apparatus Cytoplasm	Highly expressed in liver, placenta and adrenal gland. Moderately expressed in small intestine, lung, stomach and prostate. Weakly expressed in trachea and spleen.
Q9UBX5	FBLN5_HUMAN	Fibulin-5 (FIBL-5) (Developmental arteries and neural crest EGF-like protein) (Dance) (Urine p50 protein) (UP50)	4500	3.65321	Secreted Secreted, extracellular space, extracellular matrix Note=co-localizes with ELN in elastic fibers.	Expressed in skin fibroblasts (at protein level)(PubMed:17035250). Expressed predominantly in heart, ovary, and colon but also in kidney, pancreas, testis, lung and placenta. Not detectable in brain, liver, thymus, prostate, or peripheral blood leukocytes (PubMed:10428823).
Q9BWV1	BOC_HUMAN	Brother of CDO (Protein BOC)	4500	3.65321	Cell membrane ; Single-pass type I membrane protein Note=Enriched at sites of cell-cell contact.	Detected in skeletal muscle, heart, thymus, kidney and small intestine. Detected at lower levels in brain, placenta, lung and colon mucosa.
P35916	VGFR3_HUMAN	Vascular endothelial growth factor receptor 3 (VEGFR-3) (EC 2.7.10.1) (Fms-like tyrosine kinase 4) (FLT-4) (Tyrosine-protein kinase receptor FLT4)	4100	3.61278	Cell membrane ; Single-pass type I membrane protein. Cytoplasm Nucleus Note=Ligand-mediated autophosphorylation leads to rapid internalization.; Isoform 1: Cell membrane; Single-pass type I membrane protein. Note=Ligand-mediated autophosphorylation leads to rapid internalization.; Isoform 2: Cell membrane; Single-pass type I membrane protein.; Isoform 3: Secreted. Cytoplasm.	Detected in endothelial cells (at protein level). Widely expressed. Detected in fetal spleen, lung and brain. Detected in adult liver, muscle, thymus, placenta, lung, testis, ovary, prostate, heart, and kidney.
P28799	GRN_HUMAN	Progranulin (PGRN) (Acrogranin) (Epithelin precursor) (Glycoprotein of 88 Kda) (GP88) (Glycoprotein 88) (Granulin precursor) (PC cell-derived growth factor) (PCDGF) (Proepithelin) (PEPI) [Cleaved into: Paragranulin; Granulin-1 (Granulin G); Granulin-2 (Granulin F); Granulin-3 (Epithelin-2) (Granulin B); Granulin-4 (Epithelin-1) (Granulin A); Granulin-5 (Granulin C); Granulin-6 (Granulin D); Granu…	3900	3.59106	Secreted Lysosome Note=Endocytosed by SORT1 and delivred to lysosomes (PubMed:21092856, PubMed:28073925). Targeted to lysosome by PSAP via M6PR and LRP1, in both biosynthetic and endocytic pathways (PubMed:26370502, PubMed:28073925). Co-localized with GBA in the intracellular trafficking compartments until to lysosome (By similarity).	In myelogenous leukemic cell lines of promonocytic, promyelocytic, and proerythroid lineage, in fibroblasts, and very strongly in epithelial cell lines. Present in inflammatory cells and bone marrow. Highest levels in kidney.
P46939	UTRO_HUMAN	Utrophin (Dystrophin-related protein 1) (DRP-1)	3900	3.59106	Cell junction, synapse, postsynaptic cell membrane; Peripheral membrane protein; Cytoplasmic side. Cytoplasm, cytoskeleton. Note=Neuromuscular junction.	Isoform 1 has high expression in muscle. Isoforms Up70 and Up140 were found in all the adult and fetal tissues tested and relatively abundant in lung and kidney.
Q12841	FSTL1_HUMAN	Follistatin-related protein 1 (Follistatin-like protein 1)	3600	3.5563	Secreted	Overexpressed in synovial tissues from rheumatoid arthritis.
O43157	PLXB1_HUMAN	Plexin-B1 (Semaphorin receptor SEP)	3500	3.54407	Isoform 1: Cell membrane ; Single-pass type I membrane protein; Isoform 2: Secreted; Isoform 3: Secreted	Highly expressed in fetal kidney, and at slightly lower levels in fetal brain, lung and liver.
P00390	GSHR_HUMAN	Glutathione reductase, mitochondrial (GR) (GRase) (EC 1.8.1.7)	3500	3.54407	Isoform Mitochondrial: Mitochondrion.; Isoform Cytoplasmic: Cytoplasm.
O43505	B4GA1_HUMAN	Beta-1,4-glucuronyltransferase 1 (EC 2.4.1.-) (I-beta-1,3-N-acetylglucosaminyltransferase) (iGnT) (N-acetyllactosaminide beta-1,3-N-acetylglucosaminyltransferase) (Poly-N-acetyllactosamine extension enzyme) (UDP-GlcNAc:betaGal beta-1,3-N-acetylglucosaminyltransferase 1)	3300	3.51851	Golgi apparatus membrane ; Single-pass type II membrane protein Note=Localizes near the trans-Golgi apparatus.	In the adult, highly expressed in heart, brain, skeletal muscle and kidney and to a lesser extent in placenta, pancreas, spleen, prostate, testis, ovary, small intestine and colon. Very weak expression in lung, liver, thymus and peripheral blood leukocytes. In fetal highly expressed in brain and kidney and to a lesser extent in lung and liver.
Q9HBR0	S38AA_HUMAN	Putative sodium-coupled neutral amino acid transporter 10 (Solute carrier family 38 member 10)	3300	3.51851	Membrane ; Multi-pass membrane protein
Q6UXH9	PAMR1_HUMAN	Inactive serine protease PAMR1 (Peptidase domain-containing protein associated with muscle regeneration 1) (Regeneration-associated muscle protease homolog)	3300	3.51851	Secreted
O15031	PLXB2_HUMAN	Plexin-B2 (MM1)	3100	3.49136	Cell membrane ; Single-pass type I membrane protein
Q04721	NOTC2_HUMAN	Neurogenic locus notch homolog protein 2 (Notch 2) (hN2) [Cleaved into: Notch 2 extracellular truncation (N2ECD); Notch 2 intracellular domain (N2ICD)]	2800	3.44716	Notch 2 extracellular truncation: Cell membrane ; Single-pass type I membrane protein; Notch 2 intracellular domain: Nucleus Cytoplasm Note=Following proteolytical processing NICD is translocated to the nucleus. Retained at the cytoplasm by TCIM (PubMed:25985737).	Expressed in the brain, heart, kidney, lung, skeletal muscle and liver. Ubiquitously expressed in the embryo.
Q14126	DSG2_HUMAN	Desmoglein-2 (Cadherin family member 5) (HDGC)	2700	3.43136	Cell membrane; Single-pass type I membrane protein. Cell junction, desmosome.	All of the tissues tested and carcinomas.
Q02487	DSC2_HUMAN	Desmocollin-2 (Cadherin family member 2) (Desmocollin-3) (Desmosomal glycoprotein II) (Desmosomal glycoprotein III)	2700	3.43136	Cell membrane ; Single-pass type I membrane protein Cell junction, desmosome	Expressed in epithelia, myocardium and lymph nodes.
P07942	LAMB1_HUMAN	Laminin subunit beta-1 (Laminin B1 chain) (Laminin-1 subunit beta) (Laminin-10 subunit beta) (Laminin-12 subunit beta) (Laminin-2 subunit beta) (Laminin-6 subunit beta) (Laminin-8 subunit beta)	2600	3.41497	Secreted, extracellular space, extracellular matrix, basement membrane. Note=Major component.
P14618	KPYM_HUMAN	Pyruvate kinase PKM (EC 2.7.1.40) (Cytosolic thyroid hormone-binding protein) (CTHBP) (Opa-interacting protein 3) (OIP-3) (Pyruvate kinase 2/3) (Pyruvate kinase muscle isozyme) (Thyroid hormone-binding protein 1) (THBP1) (Tumor M2-PK) (p58)	2500	3.39794	Cytoplasm Nucleus. Note=Translocates to the nucleus in response to different apoptotic stimuli. Nuclear translocation is sufficient to induce cell death that is caspase independent, isoform-specific and independent of its enzymatic activity.	Specifically expressed in proliferating cells, such as embryonic stem cells, embryonic carcinoma cells, as well as cancer cells.
Q08830	FGL1_HUMAN	Fibrinogen-like protein 1 (HP-041) (Hepassocin) (HPS) (Hepatocyte-derived fibrinogen-related protein 1) (HFREP-1) (Liver fibrinogen-related protein 1) (LFIRE-1)	2300	3.36173	Secreted Note=Secreted in the blood plasma.	Under normal conditions, liver-specific.
O75144	ICOSL_HUMAN	ICOS ligand (B7 homolog 2) (B7-H2) (B7-like protein Gl50) (B7-related protein 1) (B7RP-1) (CD antigen CD275)	2200	3.34242	Cell membrane ; Single-pass type I membrane protein	Isoform 1 is widely expressed (brain, heart, kidney, liver, lung, pancreas, placenta, skeletal muscle, bone marrow, colon, ovary, prostate, testis, lymph nodes, leukocytes, spleen, thymus and tonsil), while isoform 2 is detected only in lymph nodes, leukocytes and spleen. Expressed on activated monocytes and dendritic cells.
P11362	FGFR1_HUMAN	Fibroblast growth factor receptor 1 (FGFR-1) (EC 2.7.10.1) (Basic fibroblast growth factor receptor 1) (BFGFR) (bFGF-R-1) (Fms-like tyrosine kinase 2) (FLT-2) (N-sam) (Proto-oncogene c-Fgr) (CD antigen CD331)	2000	3.30103	Cell membrane; Single-pass type I membrane protein. Nucleus. Cytoplasm, cytosol. Cytoplasmic vesicle. Note=After ligand binding, both receptor and ligand are rapidly internalized. Can translocate to the nucleus after internalization, or by translocation from the endoplasmic reticulum or Golgi apparatus to the cytosol, and from there to the nucleus.	Detected in astrocytoma, neuroblastoma and adrenal cortex cell lines. Some isoforms are detected in foreskin fibroblast cell lines, however isoform 17, isoform 18 and isoform 19 are not detected in these cells.
Q9NR99	MXRA5_HUMAN	Matrix-remodeling-associated protein 5 (Adhesion protein with leucine-rich repeats and immunoglobulin domains related to perlecan) (Adlican)	1700	3.23045	Secreted	Highly expressed in kidney, also detected on liver and spleen (PubMed:27599751). Expressed by proximal tubular cells of the kidney (at protein level) (PubMed:27599751). Expression highly increases during chronic kidney disease and autosomal dominant polycystic kidney disease, where is detected in cysts (PubMed:27599751).
P11279	LAMP1_HUMAN	Lysosome-associated membrane glycoprotein 1 (LAMP-1) (Lysosome-associated membrane protein 1) (CD107 antigen-like family member A) (CD antigen CD107a)	1600	3.20412	Cell membrane ; Single-pass type I membrane protein Endosome membrane; Single-pass type I membrane protein Lysosome membrane ; Single-pass type I membrane protein Late endosome Note=This protein shuttles between lysosomes, endosomes, and the plasma membrane (By similarity). Colocalizes with OSBPL1A at the late endosome (PubMed:16176980).
Q6UX71	PXDC2_HUMAN	Plexin domain-containing protein 2 (Tumor endothelial marker 7-related protein)	1600	3.20412	Membrane ; Single-pass type I membrane protein	Expressed in the endothelial cells of the stroma but not in the endothelial cells of normal colonic tissue.
P08519	APOA_HUMAN	Apolipoprotein(a) (Apo(a)) (Lp(a)) (EC 3.4.21.-)	1400	3.14613
P07911	UROM_HUMAN	Uromodulin (Tamm-Horsfall urinary glycoprotein) (THP) [Cleaved into: Uromodulin, secreted form]	1400	3.14613	Apical cell membrane ; Lipid-anchor, GPI-anchor Basolateral cell membrane ; Lipid-anchor, GPI-anchor Cell projection, cilium membrane Note=Only a small fraction sorts to the basolateral pole of tubular epithelial cells compared to apical localization (PubMed:22776760). Secreted into urine after cleavage (PubMed:18375198, PubMed:26811476). Colocalizes with NPHP1 and KIF3A (PubMed:20172860).; Uromo…	Expressed in the tubular cells of the kidney. Most abundant protein in normal urine (at protein level). Synthesized exclusively in the kidney. Expressed exclusively by epithelial cells of the thick ascending limb of Henle's loop (TALH) and of distal convoluted tubule lumen.
Q01082	SPTB2_HUMAN	Spectrin beta chain, non-erythrocytic 1 (Beta-II spectrin) (Fodrin beta chain) (Spectrin, non-erythroid beta chain 1)	1400	3.14613	Cytoplasm, cytoskeleton Cytoplasm, myofibril, sarcomere, M line Note=Colocalizes with ANK2 in a distinct intracellular compartment of neonatal cardiomyocytes.; Isoform 2: Cell membrane ; Peripheral membrane protein ; Cytoplasmic side	Isoform 2 is present in brain, lung and kidney (at protein level).
P54802	ANAG_HUMAN	Alpha-N-acetylglucosaminidase (EC 3.2.1.50) (N-acetyl-alpha-glucosaminidase) (NAG) [Cleaved into: Alpha-N-acetylglucosaminidase 82 kDa form; Alpha-N-acetylglucosaminidase 77 kDa form]	1400	3.14613	Lysosome.	Liver, ovary, peripheral blood leukocytes, testis, prostate, spleen, colon, lung, placenta and kidney.
Q76LX8	ATS13_HUMAN	A disintegrin and metalloproteinase with thrombospondin motifs 13 (ADAM-TS 13) (ADAM-TS13) (ADAMTS-13) (EC 3.4.24.87) (von Willebrand factor-cleaving protease) (vWF-CP) (vWF-cleaving protease)	1200	3.07918	Secreted Note=Secretion enhanced by O-fucosylation of TSP type-1 repeats.	Plasma. Expressed primarily in liver.
P55285	CADH6_HUMAN	Cadherin-6 (Kidney cadherin) (K-cadherin)	1200	3.07918	Cell membrane; Single-pass type I membrane protein.	Highly expressed in brain, cerebellum, and kidney. Lung, pancreas, and gastric mucosa show a weak expression. Also expressed in certain liver and kidney carcinomas.
Q9HCL0	PCD18_HUMAN	Protocadherin-18	1200	3.07918	Cell membrane ; Single-pass type I membrane protein	Expressed in all tissues, with highest expression in lung and ovary.
P09603	CSF1_HUMAN	Macrophage colony-stimulating factor 1 (CSF-1) (M-CSF) (MCSF) (Lanimostim) [Cleaved into: Processed macrophage colony-stimulating factor 1]	806.4	2.90655	Cell membrane ; Single-pass type I membrane protein; Processed macrophage colony-stimulating factor 1: Secreted, extracellular space.
O14960	LECT2_HUMAN	Leukocyte cell-derived chemotaxin-2 (LECT-2) (hLECT2)	800	2.90309	Cytoplasm Secreted	Highly expressed in adult and fetal liver and weakly in testis. Not expressed in bone marrow.
Q9NS62	THSD1_HUMAN	Thrombospondin type-1 domain-containing protein 1 (Transmembrane molecule with thrombospondin module)	800	2.90309	Isoform 1: Membrane ; Single-pass type I membrane protein; Isoform 2: Membrane ; Single-pass type I membrane protein; Isoform 3: Secreted.
Q14D04	MELT_HUMAN	Ventricular zone-expressed PH domain-containing protein homolog 1 (Protein melted)	700	2.8451	Cell membrane ; Peripheral membrane protein ; Cytoplasmic side
P60022	DEFB1_HUMAN	Beta-defensin 1 (BD-1) (hBD-1) (Defensin, beta 1)	300	2.47712	Secreted Membrane Note=Associates with tumor cell membrane-derived microvesicles (PubMed:23938203).	Blood plasma. Sperm. Highly expressed in the lower head and midpiece of sperm. Significantly reduced levels found in the sperms of asthenozoospermia and leukocytospermia patients (at protein level).
Q86SJ2	AMGO2_HUMAN	Amphoterin-induced protein 2 (AMIGO-2) (Alivin-1) (Differentially expressed in gastric adenocarcinomas) (DEGA)	200	2.30103	Cell membrane ; Single-pass type I membrane protein Nucleus Note=Associated with nucleus as well as plasma membrane. Restricted to somata of cerebellar as well as hippocampal neurons (By similarity).	Highest levels in breast, ovary, cervix, and uterus. Lower levels in lung, colon, and rectum. Differentially expressed in 56% of thyroid, 57% of pancreatic and 45% of stomach cancers.
Q9UPN9	TRI33_HUMAN	E3 ubiquitin-protein ligase TRIM33 (EC 2.3.2.27) (Ectodermin homolog) (RET-fused gene 7 protein) (Protein Rfg7) (RING-type E3 ubiquitin transferase TRIM33) (Transcription intermediary factor 1-gamma) (TIF1-gamma) (Tripartite motif-containing protein 33)	100	2	Nucleus Note=In discrete nuclear dots resembling nuclear bodies.	Expressed in stem cells at the bottom of the crypts of the colon (at protein level). Expressed in colon adenomas and adenocarcinomas (at protein level). Expressed in brain, lung, liver, spleen, thymus, prostate, kidney, testis, heart, placenta, pancreas, small intestine, ovary, colon, skeletal muscle and hematopoietic progenitors.
P05166	PCCB_HUMAN	Propionyl-CoA carboxylase beta chain, mitochondrial (PCCase subunit beta) (EC 6.4.1.3) (Propanoyl-CoA:carbon dioxide ligase subunit beta)	100	2	Mitochondrion matrix
Q6NV74	K121L_HUMAN	Uncharacterized protein KIAA1211-like	100	2
P54108	CRIS3_HUMAN	Cysteine-rich secretory protein 3 (CRISP-3) (Specific granule protein of 28 kDa) (SGP28)	6.3	0.799341	Secreted. Note=In neutrophils, localized in specific granules.	Salivary gland, pancreas and prostate > epididymis, ovary, thymus and colon.
Q7Z7M0	MEGF8_HUMAN	Multiple epidermal growth factor-like domains protein 8 (Multiple EGF-like domains protein 8) (Epidermal growth factor-like protein 4) (EGF-like protein 4)	4.3	0.633468	Membrane ; Single-pass type I membrane protein
