# Supplementary material for: Potential early clinical stage colorectal cancer diagnosis using a proteomics blood test panel
Source: Clin Proteomics. 2019 Aug 28;16:34. doi: 10.1186/s12014-019-9255-z (PMC6712843; doi:10.1186/s12014-019-9255-z)
Supplement: Supplementary file 4 — Additional file 4: Table S3. List of 8 proteins that have not previously identified in human plasma, searched against PeptideAtlas database. [file 12014_2019_9255_MOESM4_ESM.xlsx]

## Sheet: 8 proteins not seen in plasma 
Gene ID	Uniprot ID	Protein names	Expression organ	PeptideAtlas status	neXtProt PE Status
CASP12	Q6UXS9	Inactive caspase-12	Ovari, Endometrium	subsumed by	Evidence at protein level
AK6	Q9Y3D8	Adenylate kinase isoenzyme 6	Ubiquitous expression	canonical	Evidence at protein level
CEP290	O15078	Centrosomal protein of 290 kDa	Ubiquitous expression	canonical	Evidence at protein level
ODF3L1	Q8IXM7	Outer dense fiber protein 3-like protein 1	Testis	canonical	Evidence at protein level
SYN2	Q92777	Synapsin-2	Brain	canonical	Evidence at protein level
ZNF536	O15090	Zinc finger protein 536	Brain	canonical	Evidence at protein level
NRP2	Q9NRP2	Neuropilin-2	Placenta, Ovary	canonical	Evidence at protein level
SHPRH	Q149N8	E3 ubiquitin-protein ligase	Ubiquitous expression	canonical	Evidence at protein level
