# Supplementary material for: Potential early clinical stage colorectal cancer diagnosis using a proteomics blood test panel
Source: Clin Proteomics. 2019 Aug 28;16:34. doi: 10.1186/s12014-019-9255-z (PMC6712843; doi:10.1186/s12014-019-9255-z)
Supplement: Supplementary file 5 — Additional file 5: Table S4. List of quantifiable plasma proteins captured by non-depletion and depletion strategies. [file 12014_2019_9255_MOESM5_ESM.xlsx]

## Sheet: Non-depleted
Protein	Control-1	Control-2	Control-3	stage I-1	stage I-2	stage I-3	stage II-1	stage II-2	stage II-3	stage III-1	stage III-2	stage III-3	stage IV-1	stage IV-2	stage IV-3	Uniprot ID	Protein.names
sp|P01031|CO5_HUMAN	1.06013e+06	1.21859e+06	1.06712e+06	1.29805e+06	1.33778e+06	1.34177e+06	1.10829e+06	870164	1.14016e+06	1.623e+06	1.67293e+06	1.47544e+06	933481	831548	893798	P01031	Complement C5 (C3 and PZP-like alpha-2-macroglobulin domain-containing protein 4) [Cleaved into: Complement C5 beta chain; Complement C5 alpha chain; C5a anaphylatoxin; Complement C5 alpha' chain]
sp|P02100|HBE_HUMAN	388416	363678	367829	429203	450337	487528	562926	605480	460507	1.04278e+06	918400	976539	280825	299199	322321	P02100	Hemoglobin subunit epsilon (Epsilon-globin) (Hemoglobin epsilon chain)
sp|P02647|APOA1_HUMAN	2.12113e+06	1.99487e+06	1.98368e+06	2.99103e+06	2.53571e+06	2.76661e+06	2.82249e+06	3.01267e+06	2.97251e+06	2.45787e+06	2.53819e+06	2.36862e+06	1.79361e+06	1.99255e+06	1.92993e+06	P02647	Apolipoprotein A-I (Apo-AI) (ApoA-I) (Apolipoprotein A1) [Cleaved into: Proapolipoprotein A-I (ProapoA-I); Truncated apolipoprotein A-I (Apolipoprotein A-I(1-242))]
sp|P08519|APOA_HUMAN	395522	267713	259761	463730	504349	461140	279401	356871	391070	300259	318577	393155	224108	180385	188804	P08519	Apolipoprotein(a) (Apo(a)) (Lp(a)) (EC 3.4.21.-)
sp|P51884|LUM_HUMAN	662133	491989	654473	538240	781023	509262	523265	536247	652435	631721	643657	699722	476317	353832	442715	P51884	Lumican (Keratan sulfate proteoglycan lumican) (KSPG lumican)
sp|P68871|HBB_HUMAN	753260	821765	884778	791627	883225	826599	1.03257e+06	969633	885634	1.58257e+06	1.56282e+06	1.65194e+06	617043	691291	707554	P68871	Hemoglobin subunit beta (Beta-globin) (Hemoglobin beta chain) [Cleaved into: LVV-hemorphin-7; Spinorphin]
sp|P69905|HBA_HUMAN	92676.7	81048.4	80840.3	86752.9	110129	72343.3	59497.5	89219.3	91288	154143	153615	185590	63822.4	60982.3	56962.8	P69905	Hemoglobin subunit alpha (Alpha-globin) (Hemoglobin alpha chain)
sp|P80108|PHLD_HUMAN	282196	260730	293578	400811	421195	381207	416666	306894	340809	303607	371289	370199	219944	228062	249972	P80108	Phosphatidylinositol-glycan-specific phospholipase D (PI-G PLD) (EC 3.1.4.50) (Glycoprotein phospholipase D) (Glycosyl-phosphatidylinositol-specific phospholipase D) (GPI-PLD) (GPI-specific phospholipase D)
sp|Q16270|IBP7_HUMAN	37053.5	40621.7	41349.8	42628.9	48255.3	39042.8	26702.9	28982.3	33640.7	38771.6	36950.6	37368.1	12767.5	22322.5	22944.6	Q16270	Insulin-like growth factor-binding protein 7 (IBP-7) (IGF-binding protein 7) (IGFBP-7) (IGFBP-rP1) (MAC25 protein) (PGI2-stimulating factor) (Prostacyclin-stimulating factor) (Tumor-derived adhesion factor) (TAF)
sp|P01857|IGHG1_HUMAN	3.49967e+06	3.38404e+06	3.23308e+06	2.65736e+06	2.5365e+06	2.42462e+06	2.67269e+06	2.39188e+06	2.72975e+06	3.71643e+06	3.71771e+06	3.99573e+06	2.73801e+06	3.01672e+06	3.28101e+06	P01857	Ig gamma-1 chain C region
sp|P01860|IGHG3_HUMAN	8.92455e+06	6.67221e+06	6.40039e+06	5.09772e+06	5.82771e+06	4.53971e+06	5.86804e+06	6.69576e+06	8.19208e+06	1.04557e+07	1.00648e+07	1.36657e+07	6.7854e+06	5.15826e+06	6.10891e+06	P01860	Ig gamma-3 chain C region (HDC) (Heavy chain disease protein)
sp|P05019|IGF1_HUMAN	34045.9	21252.6	21164.4	21656.9	21527.7	16908.4	15711.1	19209.1	19722.3	32466	30182.1	35561.7	27263.6	22327.2	21934.7	P05019	Insulin-like growth factor I (IGF-I) (Mechano growth factor) (MGF) (Somatomedin-C)
sp|P08294|SODE_HUMAN	50788.9	87584.9	59451.8	23361.9	20332.7	3956.78	19378.6	28004.3	23438.4	31040.8	44957.5	50708.4	30486.7	60681.7	38998	P08294	Extracellular superoxide dismutase [Cu-Zn] (EC-SOD) (EC 1.15.1.1)
sp|P22792|CPN2_HUMAN	789176	690533	742924	415501	516662	389437	380377	384604	557957	662584	650948	757949	326694	510788	534461	P22792	Carboxypeptidase N subunit 2 (Carboxypeptidase N 83 kDa chain) (Carboxypeptidase N large subunit) (Carboxypeptidase N polypeptide 2) (Carboxypeptidase N regulatory subunit)
sp|P22897|MRC1_HUMAN	136195	122093	132563	10575.2	38199.3	34425.1	58322.4	65889.9	68786.4	18442.1	102743	19693.3	88748.6	50615.1	34699.2	P22897	Macrophage mannose receptor 1 (MMR) (C-type lectin domain family 13 member D) (C-type lectin domain family 13 member D-like) (Human mannose receptor) (hMR) (Macrophage mannose receptor 1-like protein 1) (CD antigen CD206)
sp|P26927|HGFL_HUMAN	328476	271381	516767	208831	205561	134194	290054	327112	296236	298084	437499	497442	259957	240361	175372	P26927	Hepatocyte growth factor-like protein (Macrophage stimulatory protein) (Macrophage-stimulating protein) (MSP) [Cleaved into: Hepatocyte growth factor-like protein alpha chain; Hepatocyte growth factor-like protein beta chain]
sp|Q14520|HABP2_HUMAN	489021	493144	421478	359165	471881	366792	405934	479780	552227	598424	503234	645083	414344	313589	310691	Q14520	Hyaluronan-binding protein 2 (EC 3.4.21.-) (Factor VII-activating protease) (Factor seven-activating protease) (FSAP) (Hepatocyte growth factor activator-like protein) (Plasma hyaluronan-binding protein) [Cleaved into: Hyaluronan-binding protein 2 50 kDa heavy chain; Hyaluronan-binding protein 2 50 kDa heavy chain alternate form; Hyaluronan-binding protein 2 27 kDa light chain; Hyaluronan-binding…
sp|Q86UX7|URP2_HUMAN	32533.3	7344.78	45238.3	6281.29	8488.34	791.897	10097.1	28236.9	10347.8	33258.2	36761.9	19892	3045.87	906.271	3838.44	Q86UX7	Fermitin family homolog 3 (Kindlin-3) (MIG2-like protein) (Unc-112-related protein 2)
sp|Q9Y2K3|MYH15_HUMAN	1.57825e+06	1.72212e+06	1.67511e+06	78343.5	1.43371e+06	249675	1.13022e+06	1.20714e+06	1.19719e+06	1.32373e+06	2.79906e+06	1.67896e+06	1.8218e+06	1.63017e+06	1.54279e+06	Q9Y2K3	Myosin-15 (Myosin heavy chain 15)
sp|P01871|IGHM_HUMAN	9.70311e+06	9.66046e+06	9.31926e+06	6.98627e+06	7.77054e+06	6.80164e+06	6.96514e+06	8.81151e+06	8.85182e+06	8.08961e+06	7.61095e+06	8.31779e+06	1.18541e+07	1.09616e+07	1.10595e+07	P01871	Ig mu chain C region
sp|P02750|A2GL_HUMAN	522349	526003	427833	418344	359893	316469	512441	573186	598067	502986	595832	527056	610444	664790	727046	P02750	Leucine-rich alpha-2-glycoprotein (LRG)
sp|P02763|A1AG1_HUMAN	259190	252834	242700	164643	161545	159395	266792	222731	249891	209152	243154	211333	271395	283050	228549	P02763	Alpha-1-acid glycoprotein 1 (AGP 1) (Orosomucoid-1) (OMD 1)
sp|P02775|CXCL7_HUMAN	750304	749954	601365	686488	677247	664775	792685	540351	648736	647560	738326	794204	1.03356e+06	923708	1.11495e+06	P02775	Platelet basic protein (PBP) (C-X-C motif chemokine 7) (Leukocyte-derived growth factor) (LDGF) (Macrophage-derived growth factor) (MDGF) (Small-inducible cytokine B7) [Cleaved into: Connective tissue-activating peptide III (CTAP-III) (LA-PF4) (Low-affinity platelet factor IV); TC-2; Connective tissue-activating peptide III(1-81) (CTAP-III(1-81)); Beta-thromboglobulin (Beta-TG); Neutrophil-activa…
sp|P04264|K2C1_HUMAN	36728.2	23103.6	97412.3	27420.9	98527.7	47886.3	53740.9	114929	116162	72892.6	66868.2	73034.8	371262	343201	348960	P04264	Keratin, type II cytoskeletal 1 (67 kDa cytokeratin) (Cytokeratin-1) (CK-1) (Hair alpha protein) (Keratin-1) (K1) (Type-II keratin Kb1)
sp|P05090|APOD_HUMAN	678361	745620	743491	870243	706789	1.03269e+06	979406	539223	498276	1.15526e+06	1.18643e+06	891242	1.1528e+06	1.20523e+06	1.29806e+06	P05090	Apolipoprotein D (Apo-D) (ApoD)
sp|P05109|S10A8_HUMAN	9165.96	3123.79	11362.2	7736.46	47720.2	27404.5	55544.3	56855.8	20250.6	22844.3	54641.7	71166	107792	74981	82209.8	P05109	Protein S100-A8 (Calgranulin-A) (Calprotectin L1L subunit) (Cystic fibrosis antigen) (CFAG) (Leukocyte L1 complex light chain) (Migration inhibitory factor-related protein 8) (MRP-8) (p8) (S100 calcium-binding protein A8) (Urinary stone protein band A) [Cleaved into: Protein S100-A8, N-terminally processed]
sp|P06702|S10A9_HUMAN	13601.3	5476.96	14750.6	13549.5	2913.42	13372.3	15387.4	21472.4	20447.2	26751.8	15308.1	19841	53495.4	56402.4	54522.7	P06702	Protein S100-A9 (Calgranulin-B) (Calprotectin L1H subunit) (Leukocyte L1 complex heavy chain) (Migration inhibitory factor-related protein 14) (MRP-14) (p14) (S100 calcium-binding protein A9)
sp|P0DJI8|SAA1_HUMAN	226341	116859	129359	222366	325665	294102	465897	503792	439763	413176	179499	448028	688768	517741	590662	P0DJI8	Serum amyloid A-1 protein (SAA) [Cleaved into: Amyloid protein A (Amyloid fibril protein AA); Serum amyloid protein A(2-104); Serum amyloid protein A(3-104); Serum amyloid protein A(2-103); Serum amyloid protein A(2-102); Serum amyloid protein A(4-101)]
sp|P0DJI9|SAA2_HUMAN	428577	434270	433453	621265	608304	666169	1.4413e+06	1.40542e+06	1.08087e+06	1.11681e+06	623781	887631	1.49435e+06	1.45986e+06	1.29153e+06	P0DJI9	Serum amyloid A-2 protein (SAA2)
sp|P10720|PF4V_HUMAN	50713.9	44248.4	68591.8	45233.1	31640.6	44107.5	56645.9	32656.3	48266.3	47372.5	49361.5	51428.3	75205.7	73898	82637.2	P10720	Platelet factor 4 variant (C-X-C motif chemokine 4 variant) (CXCL4L1) (PF4alt) (PF4var1) [Cleaved into: Platelet factor 4 variant(4-74); Platelet factor 4 variant(5-74); Platelet factor 4 variant(6-74)]
sp|Q9BXR6|FHR5_HUMAN	25721.8	54535.5	33525.2	62740.5	51487.7	44623.6	39420.8	52210.4	53551.8	69499.3	25837.3	68009.3	86788.1	85503.4	129010	Q9BXR6	Complement factor H-related protein 5 (FHR-5)
sp|Q9UEW3|MARCO_HUMAN	2165.6	2891.68	8218.01	7030.35	94222.4	19074.2	82466.3	3779.15	3478.34	57296	50694.9	93518.4	42864.8	75611.6	116899	Q9UEW3	Macrophage receptor MARCO (Macrophage receptor with collagenous structure) (Scavenger receptor class A member 2)
sp|P02452|CO1A1_HUMAN	163415	132977	152020	1.01811e+06	870605	661362	208464	201742	191089	119896	157173	136042	143333	178839	111884	P02452	Collagen alpha-1(I) chain (Alpha-1 type I collagen)
sp|P02656|APOC3_HUMAN	1.53866e+07	1.49972e+07	1.53271e+07	1.59477e+07	1.70112e+07	1.52596e+07	1.15053e+07	1.13726e+07	1.154e+07	1.52132e+07	1.39284e+07	1.58118e+07	1.08327e+07	1.03967e+07	1.04868e+07	P02656	Apolipoprotein C-III (Apo-CIII) (ApoC-III) (Apolipoprotein C3)
sp|P02751|FINC_HUMAN	2.22214e+06	1.92896e+06	2.13926e+06	3.83712e+06	3.99719e+06	4.13313e+06	1.57567e+06	1.45739e+06	1.8742e+06	1.82321e+06	2.25979e+06	2.25238e+06	2.29719e+06	1.58434e+06	1.82107e+06	P02751	Fibronectin (FN) (Cold-insoluble globulin) (CIG) [Cleaved into: Anastellin; Ugl-Y1; Ugl-Y2; Ugl-Y3]
sp|P05160|F13B_HUMAN	392269	404400	366892	410927	424772	381422	270221	260757	224058	386075	345829	411362	312420	307469	308957	P05160	Coagulation factor XIII B chain (Fibrin-stabilizing factor B subunit) (Protein-glutamine gamma-glutamyltransferase B chain) (Transglutaminase B chain)
sp|P08123|CO1A2_HUMAN	14340.5	29363.3	18908.3	287618	287743	227700	19858.1	52807	16397.8	27535.5	6864.33	7142.24	34695.1	19535.5	17065.6	P08123	Collagen alpha-2(I) chain (Alpha-2 type I collagen)
sp|P36955|PEDF_HUMAN	632587	779769	752381	950148	767739	811651	379814	664238	328026	430300	770115	654965	865745	693792	747357	P36955	Pigment epithelium-derived factor (PEDF) (Cell proliferation-inducing gene 35 protein) (EPC-1) (Serpin F1)
sp|Q86VB7|C163A_HUMAN	18914.7	13444.8	11751.9	27628.2	47065.7	44716.4	19259.4	15607.2	21098.9	39259.3	26389.6	30684.5	35062.6	37445.4	16468.4	Q86VB7	Scavenger receptor cysteine-rich type 1 protein M130 (Hemoglobin scavenger receptor) (CD antigen CD163) [Cleaved into: Soluble CD163 (sCD163)]
sp|P02654|APOC1_HUMAN	245393	238410	123648	132186	182734	102611	99582	40304.1	98720.8	47035.1	45929.8	133488	160875	155579	150121	P02654	Apolipoprotein C-I (Apo-CI) (ApoC-I) (Apolipoprotein C1) [Cleaved into: Truncated apolipoprotein C-I]
sp|P06276|CHLE_HUMAN	2474.53	76856.8	100171	68883.9	96393.4	2637.01	75041.3	98865	96330.9	1242.1	3201	1288.23	89233.7	81676	115149	P06276	Cholinesterase (EC 3.1.1.8) (Acylcholine acylhydrolase) (Butyrylcholine esterase) (Choline esterase II) (Pseudocholinesterase)
sp|P14314|GLU2B_HUMAN	145260	141480	143401	160324	181733	170350	184447	194692	197242	5996.48	4858.04	171734	131578	107324	128110	P14314	Glucosidase 2 subunit beta (80K-H protein) (Glucosidase II subunit beta) (Protein kinase C substrate 60.1 kDa protein heavy chain) (PKCSH)
sp|P51608|MECP2_HUMAN	30043	33954.6	16390.4	5964.33	12999.4	13473.5	11019	6032.18	7399.59	1908.28	14625.4	2248.58	1461.53	3242.52	3642.26	P51608	Methyl-CpG-binding protein 2 (MeCp-2 protein) (MeCp2)
sp|P02765|FETUA_HUMAN	3.26567e+06	2.98895e+06	2.73947e+06	3.69766e+06	3.93443e+06	3.70994e+06	3.14761e+06	3.83539e+06	3.93084e+06	2.68213e+06	2.65605e+06	2.86494e+06	2.5427e+06	2.27302e+06	2.43384e+06	P02765	Alpha-2-HS-glycoprotein (Alpha-2-Z-globulin) (Ba-alpha-2-glycoprotein) (Fetuin-A) [Cleaved into: Alpha-2-HS-glycoprotein chain A; Alpha-2-HS-glycoprotein chain B]
sp|P03951|FA11_HUMAN	372505	371099	269444	298349	403213	349743	455105	437441	754112	424127	323460	308372	273572	324256	291416	P03951	Coagulation factor XI (FXI) (EC 3.4.21.27) (Plasma thromboplastin antecedent) (PTA) [Cleaved into: Coagulation factor XIa heavy chain; Coagulation factor XIa light chain]
sp|P0CG38|POTEI_HUMAN	140772	111987	93560.7	119959	112264	117518	155274	183055	199846	121088	111212	147684	125280	110764	118189	P0CG38	POTE ankyrin domain family member I
sp|P62937|PPIA_HUMAN	1.5387e+06	1.26774e+06	1.1642e+06	1.41844e+06	1.59792e+06	1.30021e+06	1.48774e+06	2.11737e+06	2.17313e+06	942378	898841	1.14382e+06	1.0731e+06	838409	871700	P62937	Peptidyl-prolyl cis-trans isomerase A (PPIase A) (EC 5.2.1.8) (Cyclophilin A) (Cyclosporin A-binding protein) (Rotamase A) [Cleaved into: Peptidyl-prolyl cis-trans isomerase A, N-terminally processed]
sp|Q96DP5|FMT_HUMAN	282161	269820	227536	328095	352542	308265	573637	617020	724759	105547	152397	180638	222972	205462	204572	Q96DP5	Methionyl-tRNA formyltransferase, mitochondrial (MtFMT) (EC 2.1.2.9)
sp|Q9BYX7|ACTBM_HUMAN	149794	117819	112812	131561	135467	125821	163003	207152	210644	141858	112399	171112	140393	121874	130745	Q9BYX7	Putative beta-actin-like protein 3 (Kappa-actin) (POTE ankyrin domain family member K)
sp|A5A3E0|POTEF_HUMAN	26378.3	38898.1	42452.3	40876.9	33189.1	30735.7	62140.5	41730.2	57872.6	14166.4	39622.7	39933.1	38814.2	43673.8	18788.1	A5A3E0	POTE ankyrin domain family member F (ANKRD26-like family C member 1B) (Chimeric POTE-actin protein)
sp|O00151|PDLI1_HUMAN	60906.4	8928.01	14546.6	2532.09	18749.1	10300.6	11420	16476.3	4564.7	11789.3	16402.5	45680.5	7239.72	1391.69	18215.8	O00151	PDZ and LIM domain protein 1 (C-terminal LIM domain protein 1) (Elfin) (LIM domain protein CLP-36)
sp|O00391|QSOX1_HUMAN	40819.7	50896	55696.3	40068.2	70243.8	77607.3	62160	48343.5	50838.2	44067.3	46715.8	20919.3	25441.9	51475.4	34902.5	O00391	Sulfhydryl oxidase 1 (hQSOX) (EC 1.8.3.2) (Quiescin Q6)
sp|O00602|FCN1_HUMAN	4281.14	4098.45	2314.15	1011.99	649.941	3581.82	2156.66	1310.06	1455.55	5047.21	5054.37	1668.73	3916.32	5547.05	6300.3	O00602	Ficolin-1 (Collagen/fibrinogen domain-containing protein 1) (Ficolin-A) (Ficolin-alpha) (M-ficolin)
sp|O14786|NRP1_HUMAN	5116.67	3931.42	5034.03	2603.62	2383.48	9209.65	2377.75	7648.24	5757.38	7704.79	2048.06	772.913	2307.1	1518.47	11198.4	O14786	Neuropilin-1 (Vascular endothelial cell growth factor 165 receptor) (CD antigen CD304)
sp|O14791|APOL1_HUMAN	332645	157317	136188	259465	271280	582927	201834	68417	278240	61554	234642	621394	214018	486741	224838	O14791	Apolipoprotein L1 (Apolipoprotein L) (Apo-L) (ApoL) (Apolipoprotein L-I) (ApoL-I)
sp|O15031|PLXB2_HUMAN	4885.55	19986.9	12968.2	3180.92	30087	16235.8	4642.43	26717.9	20674	16121	2119.03	3194.18	14407.4	4165.19	14190.5	O15031	Plexin-B2 (MM1)
sp|O43805|SSNA1_HUMAN	42791.5	56591.5	114622	51939.2	40192.6	52607	110247	45211.1	40210.5	78713.6	132552	35005.4	46632.4	51609.6	64538.8	O43805	Sjoegren syndrome nuclear autoantigen 1 (Nuclear autoantigen of 14 kDa)
sp|O43866|CD5L_HUMAN	2.75865e+06	2.54726e+06	2.65112e+06	1.97138e+06	2.32968e+06	1.91639e+06	1.91679e+06	2.02847e+06	2.35093e+06	2.28223e+06	2.21932e+06	2.55442e+06	2.63711e+06	2.46657e+06	2.56237e+06	O43866	CD5 antigen-like (Apoptosis inhibitor expressed by macrophages) (hAIM) (CT-2) (IgM-associated peptide) (SP-alpha)
sp|O75144|ICOSL_HUMAN	21109.7	27392	24754.9	25297.7	21449.1	20222.5	23576.5	20219.5	18464.9	19688.8	22093.7	16956.6	17841.7	20385.4	23306.9	O75144	ICOS ligand (B7 homolog 2) (B7-H2) (B7-like protein Gl50) (B7-related protein 1) (B7RP-1) (CD antigen CD275)
sp|O75594|PGRP1_HUMAN	3308.5	3936.62	2467.65	2954.75	1605.28	33504.9	2293.49	6041.91	1951.68	2481.63	2875.23	3396.8	10256.6	2314.7	2495.58	O75594	Peptidoglycan recognition protein 1 (Peptidoglycan recognition protein short) (PGRP-S)
sp|O75636|FCN3_HUMAN	161788	167402	284482	211327	107592	277315	212205	231077	157585	155513	272392	208478	204244	258033	153979	O75636	Ficolin-3 (Collagen/fibrinogen domain-containing lectin 3 p35) (Collagen/fibrinogen domain-containing protein 3) (Hakata antigen)
sp|O75882|ATRN_HUMAN	529996	442652	439799	457524	489551	434673	397625	481330	520828	511581	390560	522831	418265	374121	356959	O75882	Attractin (DPPT-L) (Mahogany homolog)
sp|O95445|APOM_HUMAN	3.62257e+06	3.13503e+06	3.10844e+06	2.52166e+06	2.87342e+06	2.21119e+06	2.23198e+06	2.8656e+06	3.09169e+06	3.48948e+06	3.39943e+06	3.95251e+06	2.70145e+06	2.37762e+06	2.415e+06	O95445	Apolipoprotein M (Apo-M) (ApoM) (Protein G3a)
sp|O95497|VNN1_HUMAN	47739.3	29547.8	43059.8	8711.24	11992.6	1039.65	3062.17	11189.3	11535.2	17017.4	17566.5	19785.7	2289.49	3214.56	23253.7	O95497	Pantetheinase (EC 3.5.1.92) (Pantetheine hydrolase) (Tiff66) (Vascular non-inflammatory molecule 1) (Vanin-1)
sp|P00450|CERU_HUMAN	5.40885e+06	5.39243e+06	5.50589e+06	5.69484e+06	5.74524e+06	6.19814e+06	5.40951e+06	6.9328e+06	5.63827e+06	6.96502e+06	5.91069e+06	6.49026e+06	6.79125e+06	6.24662e+06	5.98879e+06	P00450	Ceruloplasmin (EC 1.16.3.1) (Ferroxidase)
sp|P00451|FA8_HUMAN	109376	116486	5610.6	2776.51	4217.53	1751.25	2721.99	76516	4927.63	2276.7	94514.5	3077.82	93660.5	85161.3	5093.64	P00451	Coagulation factor VIII (Antihemophilic factor) (AHF) (Procoagulant component) [Cleaved into: Factor VIIIa heavy chain, 200 kDa isoform; Factor VIIIa heavy chain, 92 kDa isoform; Factor VIII B chain; Factor VIIIa light chain]
sp|P00488|F13A_HUMAN	187365	109896	124400	157496	181836	173719	122818	182492	76426.2	129383	132964	176255	86181	137140	130468	P00488	Coagulation factor XIII A chain (Coagulation factor XIIIa) (EC 2.3.2.13) (Protein-glutamine gamma-glutamyltransferase A chain) (Transglutaminase A chain)
sp|P00734|THRB_HUMAN	6.53003e+06	6.35768e+06	5.87639e+06	5.37322e+06	6.04582e+06	6.02408e+06	5.29582e+06	5.60233e+06	5.86895e+06	6.98616e+06	6.54956e+06	7.01598e+06	6.09824e+06	6.05777e+06	5.91542e+06	P00734	Prothrombin (EC 3.4.21.5) (Coagulation factor II) [Cleaved into: Activation peptide fragment 1; Activation peptide fragment 2; Thrombin light chain; Thrombin heavy chain]
sp|P00736|C1R_HUMAN	1.79458e+06	1.51986e+06	1.67589e+06	2.04066e+06	1.86835e+06	2.11642e+06	1.76208e+06	1.56337e+06	1.46024e+06	2.58969e+06	2.01062e+06	2.3396e+06	1.96139e+06	1.86615e+06	1.92333e+06	P00736	Complement C1r subcomponent (EC 3.4.21.41) (Complement component 1 subcomponent r) [Cleaved into: Complement C1r subcomponent heavy chain; Complement C1r subcomponent light chain]
sp|P00738|HPT_HUMAN	8.01936e+07	7.35799e+07	7.23537e+07	6.39624e+07	7.54496e+07	6.52122e+07	7.33746e+07	9.80575e+07	1.05437e+08	7.87072e+07	7.2191e+07	8.53245e+07	9.70456e+07	8.25806e+07	7.9166e+07	P00738	Haptoglobin (Zonulin) [Cleaved into: Haptoglobin alpha chain; Haptoglobin beta chain]
sp|P00739|HPTR_HUMAN	6.38971e+06	5.90432e+06	4.03622e+06	3.70089e+06	3.6768e+06	3.59017e+06	4.11857e+06	4.6525e+06	4.06857e+06	4.03665e+06	5.37669e+06	5.35549e+06	3.50806e+06	6.4164e+06	6.85338e+06	P00739	Haptoglobin-related protein
sp|P00740|FA9_HUMAN	388739	234474	221709	398939	410604	374055	246936	358534	384729	289043	310348	335549	372494	307962	215905	P00740	Coagulation factor IX (EC 3.4.21.22) (Christmas factor) (Plasma thromboplastin component) (PTC) [Cleaved into: Coagulation factor IXa light chain; Coagulation factor IXa heavy chain]
sp|P00742|FA10_HUMAN	532404	429130	466944	727422	498335	424561	487476	522822	538903	515023	753326	609696	744343	520462	711308	P00742	Coagulation factor X (EC 3.4.21.6) (Stuart factor) (Stuart-Prower factor) [Cleaved into: Factor X light chain; Factor X heavy chain; Activated factor Xa heavy chain]
sp|P00746|CFAD_HUMAN	57685.4	60130.6	109195	60302.2	52249	46847.8	57409.3	91791.3	63624.5	100988	47919.7	95578.2	35696.4	48958.4	58615.1	P00746	Complement factor D (EC 3.4.21.46) (Adipsin) (C3 convertase activator) (Properdin factor D)
sp|P00747|PLMN_HUMAN	3.05577e+06	2.95783e+06	2.90275e+06	3.23508e+06	3.38051e+06	3.00694e+06	2.32709e+06	2.29313e+06	2.29568e+06	3.17125e+06	2.99802e+06	3.19784e+06	3.02007e+06	2.96497e+06	3.04347e+06	P00747	Plasminogen (EC 3.4.21.7) [Cleaved into: Plasmin heavy chain A; Activation peptide; Angiostatin; Plasmin heavy chain A, short form; Plasmin light chain B]
sp|P00748|FA12_HUMAN	1.86237e+06	2.13248e+06	1.52597e+06	1.98452e+06	1.85486e+06	1.7998e+06	1.68581e+06	1.688e+06	1.58872e+06	1.84595e+06	2.17476e+06	1.92755e+06	1.9097e+06	1.82562e+06	1.81083e+06	P00748	Coagulation factor XII (EC 3.4.21.38) (Hageman factor) (HAF) [Cleaved into: Coagulation factor XIIa heavy chain; Beta-factor XIIa part 1; Coagulation factor XIIa light chain (Beta-factor XIIa part 2)]
sp|P00751|CFAB_HUMAN	5.12046e+06	3.4046e+06	5.54669e+06	5.14258e+06	6.28224e+06	5.75399e+06	6.08295e+06	6.91116e+06	6.52919e+06	6.5336e+06	6.19812e+06	5.5109e+06	6.31305e+06	5.39432e+06	3.81776e+06	P00751	Complement factor B (EC 3.4.21.47) (C3/C5 convertase) (Glycine-rich beta glycoprotein) (GBG) (PBF2) (Properdin factor B) [Cleaved into: Complement factor B Ba fragment; Complement factor B Bb fragment]
sp|P01008|ANT3_HUMAN	1.76854e+06	1.89806e+06	1.80788e+06	1.69219e+06	1.69039e+06	1.5483e+06	1.45866e+06	1.5647e+06	1.63537e+06	1.38784e+06	1.49546e+06	1.31316e+06	1.35396e+06	1.44127e+06	1.41883e+06	P01008	Antithrombin-III (ATIII) (Serpin C1)
sp|P01009|A1AT_HUMAN	1.03367e+06	1.169e+06	1.18837e+06	1.13028e+06	896987	947390	1.45125e+06	671670	1.62833e+06	1.78096e+06	1.4957e+06	1.11793e+06	1.4905e+06	1.16583e+06	1.51262e+06	P01009	Alpha-1-antitrypsin (Alpha-1 protease inhibitor) (Alpha-1-antiproteinase) (Serpin A1) [Cleaved into: Short peptide from AAT (SPAAT)]
sp|P01011|AACT_HUMAN	117017	188217	143195	173672	170921	180670	178409	168681	263365	205076	173210	103870	238954	234149	231335	P01011	Alpha-1-antichymotrypsin (ACT) (Cell growth-inhibiting gene 24/25 protein) (Serpin A3) [Cleaved into: Alpha-1-antichymotrypsin His-Pro-less]
sp|P01019|ANGT_HUMAN	234966	192719	193741	170141	198207	194623	89783.9	193873	221815	269243	204052	213448	195266	167326	119343	P01019	Angiotensinogen (Serpin A8) [Cleaved into: Angiotensin-1 (Angiotensin 1-10) (Angiotensin I) (Ang I); Angiotensin-2 (Angiotensin 1-8) (Angiotensin II) (Ang II); Angiotensin-3 (Angiotensin 2-8) (Angiotensin III) (Ang III) (Des-Asp[1]-angiotensin II); Angiotensin-4 (Angiotensin 3-8) (Angiotensin IV) (Ang IV); Angiotensin 1-9; Angiotensin 1-7; Angiotensin 1-5; Angiotensin 1-4]
sp|P01023|A2MG_HUMAN	1.62062e+07	1.3557e+07	1.40474e+07	1.7736e+07	1.97117e+07	1.72238e+07	1.41595e+07	1.76983e+07	1.67771e+07	1.84943e+07	1.67865e+07	1.94906e+07	1.56755e+07	1.37843e+07	1.4688e+07	P01023	Alpha-2-macroglobulin (Alpha-2-M) (C3 and PZP-like alpha-2-macroglobulin domain-containing protein 5)
sp|P01024|CO3_HUMAN	3.72708e+07	3.54311e+07	3.59473e+07	3.80791e+07	4.04768e+07	3.55196e+07	3.52483e+07	3.72689e+07	3.79578e+07	3.919e+07	3.97293e+07	4.11667e+07	3.64445e+07	3.42318e+07	3.62664e+07	P01024	Complement C3 (C3 and PZP-like alpha-2-macroglobulin domain-containing protein 1) [Cleaved into: Complement C3 beta chain; C3-beta-c (C3bc); Complement C3 alpha chain; C3a anaphylatoxin; Acylation stimulating protein (ASP) (C3adesArg); Complement C3b alpha' chain; Complement C3c alpha' chain fragment 1; Complement C3dg fragment; Complement C3g fragment; Complement C3d fragment; Complement C3f fra…
sp|P01033|TIMP1_HUMAN	13850.9	40614.9	40249.6	16860	16622.6	13784.5	30162	21289.7	26586	4061.14	28621.1	6648.79	8531.93	15363.9	41441.7	P01033	Metalloproteinase inhibitor 1 (Erythroid-potentiating activity) (EPA) (Fibroblast collagenase inhibitor) (Collagenase inhibitor) (Tissue inhibitor of metalloproteinases 1) (TIMP-1)
sp|P01034|CYTC_HUMAN	33586	29955	38446.9	15308.7	16683.5	38093.1	18791.9	18994.4	49196.3	44390.5	17687.4	37305.1	24241.9	20487.1	8386.2	P01034	Cystatin-C (Cystatin-3) (Gamma-trace) (Neuroendocrine basic polypeptide) (Post-gamma-globulin)
sp|P01042|KNG1_HUMAN	7.6919e+06	5.76613e+06	6.96042e+06	7.56193e+06	8.86183e+06	8.69799e+06	5.95004e+06	1.05157e+07	8.68212e+06	9.84029e+06	8.29624e+06	9.87895e+06	7.17912e+06	6.08762e+06	6.3419e+06	P01042	Kininogen-1 (Alpha-2-thiol proteinase inhibitor) (Fitzgerald factor) (High molecular weight kininogen) (HMWK) (Williams-Fitzgerald-Flaujeac factor) [Cleaved into: Kininogen-1 heavy chain; T-kinin (Ile-Ser-Bradykinin); Bradykinin (Kallidin I); Lysyl-bradykinin (Kallidin II); Kininogen-1 light chain; Low molecular weight growth-promoting factor]
sp|P01344|IGF2_HUMAN	126339	984113	275562	241218	142602	123818	220486	157846	154013	1.1103e+06	665965	235590	909114	171548	326694	P01344	Insulin-like growth factor II (IGF-II) (Somatomedin-A) (T3M-11-derived growth factor) [Cleaved into: Insulin-like growth factor II; Insulin-like growth factor II Ala-25 Del; Preptin]
sp|P01591|IGJ_HUMAN	4.46466e+06	3.90293e+06	4.13335e+06	3.53074e+06	3.96547e+06	3.38988e+06	3.438e+06	3.65799e+06	4.20253e+06	3.3475e+06	3.51615e+06	3.86241e+06	4.40619e+06	4.03991e+06	4.28932e+06	P01591	Immunoglobulin J chain (Joining chain of multimeric IgA and IgM)
sp|P01708|LV205_HUMAN	222416	190900	187518	162494	217490	142550	174657	199972	220521	191588	193022	258771	167345	156511	167949	P01708	Ig lambda chain V-II region BUR
sp|P01772|HV311_HUMAN	577043	462641	389682	503540	555678	593027	485378	613617	648695	530403	459178	656503	701370	567058	584510	P01772	Immunoglobulin heavy variable 3-33 (Ig heavy chain V-III region HIL) (Ig heavy chain V-III region KOL)
sp|P01776|HV315_HUMAN	140554	359759	352969	422535	335203	337805	358662	223784	265121	251490	331387	249452	380334	486632	525096	P01776	Merged into P01764.
sp|P01777|HV316_HUMAN	435357	1.31164e+06	1.32661e+06	1.32216e+06	825321	502274	400567	802401	977051	491863	331699	505212	415097	1.49985e+06	1.66223e+06	P01777	Merged into P01764.
sp|P01834|IGKC_HUMAN	8.22737e+06	7.77351e+06	8.04145e+06	6.9698e+06	6.75897e+06	7.80228e+06	7.70945e+06	8.84331e+06	8.37824e+06	8.14192e+06	7.58119e+06	7.7052e+06	8.46782e+06	9.07822e+06	9.11377e+06	P01834	Ig kappa chain C region
sp|P01859|IGHG2_HUMAN	5.19888e+06	4.56668e+06	740237	2.97342e+06	622869	632116	635318	4.57316e+06	593762	783619	663915	651685	776203	804382	828260	P01859	Ig gamma-2 chain C region
sp|P01861|IGHG4_HUMAN	237764	231542	261379	177957	183526	160901	202066	170282	189061	190777	190280	193245	171846	182947	194074	P01861	Ig gamma-4 chain C region
sp|P01876|IGHA1_HUMAN	8.52506e+07	8.00437e+07	8.11967e+07	9.23679e+07	9.35267e+07	9.21639e+07	9.20969e+07	8.52738e+07	9.13145e+07	1.02161e+08	9.41481e+07	8.9909e+07	1.21561e+08	1.14267e+08	1.13575e+08	P01876	Ig alpha-1 chain C region
sp|P01877|IGHA2_HUMAN	8.59544e+06	6.84425e+06	7.7693e+06	3.37962e+06	7.03389e+06	5.31261e+06	3.11769e+06	9.64023e+06	9.91308e+06	4.10928e+06	3.92288e+06	8.80872e+06	4.7019e+06	3.75428e+06	3.95575e+06	P01877	Ig alpha-2 chain C region
sp|P02649|APOE_HUMAN	1.6719e+06	1.16146e+06	1.19493e+06	1.13976e+06	1.54425e+06	1.18319e+06	948463	1.1195e+06	1.22975e+06	1.02734e+06	1.23499e+06	1.56747e+06	1.21963e+06	1.04631e+06	960538	P02649	Apolipoprotein E (Apo-E)
sp|P02652|APOA2_HUMAN	4.98548e+06	4.9735e+06	4.73633e+06	5.24062e+06	6.02228e+06	5.52407e+06	4.81052e+06	4.87296e+06	4.54418e+06	7.58506e+06	4.77803e+06	6.77364e+06	4.56978e+06	4.40373e+06	4.19969e+06	P02652	Apolipoprotein A-II (Apo-AII) (ApoA-II) (Apolipoprotein A2) [Cleaved into: Proapolipoprotein A-II (ProapoA-II); Truncated apolipoprotein A-II (Apolipoprotein A-II(1-76))]
sp|P02655|APOC2_HUMAN	2.33968e+06	1.37922e+06	2.49589e+06	3.08978e+06	3.46351e+06	1.62845e+06	1.52354e+06	2.5933e+06	2.58627e+06	2.9037e+06	2.98419e+06	2.34574e+06	2.49622e+06	2.196e+06	2.14068e+06	P02655	Apolipoprotein C-II (Apo-CII) (ApoC-II) (Apolipoprotein C2) [Cleaved into: Proapolipoprotein C-II (ProapoC-II)]
sp|P02671|FIBA_HUMAN	2.11479e+07	2.01981e+07	1.88262e+07	2.32559e+07	2.39414e+07	2.13934e+07	2.14516e+07	2.21135e+07	2.28582e+07	2.23874e+07	2.10377e+07	2.4089e+07	2.61062e+07	2.42191e+07	2.44374e+07	P02671	Fibrinogen alpha chain [Cleaved into: Fibrinopeptide A; Fibrinogen alpha chain]
sp|P02675|FIBB_HUMAN	6.79001e+07	5.44652e+07	5.81269e+07	6.23448e+07	7.14189e+07	6.95786e+07	5.34284e+07	7.93516e+07	8.27328e+07	7.70331e+07	6.8929e+07	7.01995e+07	6.9972e+07	6.03766e+07	6.13786e+07	P02675	Fibrinogen beta chain [Cleaved into: Fibrinopeptide B; Fibrinogen beta chain]
sp|P02679|FIBG_HUMAN	2.61618e+07	2.40878e+07	2.4068e+07	3.11464e+07	3.50494e+07	3.16599e+07	3.01562e+07	3.64782e+07	3.39134e+07	3.16858e+07	2.88499e+07	3.22558e+07	3.21475e+07	2.99889e+07	3.10831e+07	P02679	Fibrinogen gamma chain
sp|P02741|CRP_HUMAN	31764.2	116275	111645	3446.49	106008	78646.6	112133	26896.2	138499	111388	123187	140780	114191	92270.9	93386	P02741	C-reactive protein [Cleaved into: C-reactive protein(1-205)]
sp|P02743|SAMP_HUMAN	182513	50473.1	205967	23765.3	166211	61408	108353	258458	129265	45225.8	160410	82447.7	196207	77565.7	128644	P02743	Serum amyloid P-component (SAP) (9.5S alpha-1-glycoprotein) [Cleaved into: Serum amyloid P-component(1-203)]
sp|P02745|C1QA_HUMAN	208801	173933	156342	174724	162320	143220	116729	154106	175870	158230	146173	216091	157072	122972	141293	P02745	Complement C1q subcomponent subunit A
sp|P02746|C1QB_HUMAN	27312.9	66652.5	87319.5	61305.9	83452.8	22665.3	36412.1	48907.7	46852.4	60769.5	58442.4	34056.7	20620.6	44356.3	54571	P02746	Complement C1q subcomponent subunit B
sp|P02747|C1QC_HUMAN	56241.5	43606.6	9660.05	19170.8	32785.3	16998.1	23795.4	26089.7	27869.7	38559.8	19516.1	40660.3	26634.3	13260.2	20070	P02747	Complement C1q subcomponent subunit C
sp|P02748|CO9_HUMAN	2.78526e+06	2.79465e+06	3.03096e+06	2.57726e+06	2.50645e+06	2.75554e+06	3.27562e+06	3.2642e+06	3.08945e+06	2.86014e+06	2.94387e+06	2.70079e+06	2.96019e+06	3.42394e+06	3.95869e+06	P02748	Complement component C9 [Cleaved into: Complement component C9a; Complement component C9b]
sp|P02749|APOH_HUMAN	1.10747e+07	1.13907e+07	1.07757e+07	1.22636e+07	1.17561e+07	1.27657e+07	1.30685e+07	1.19473e+07	1.12814e+07	1.19283e+07	1.24979e+07	1.19566e+07	9.11433e+06	9.53556e+06	1.07077e+07	P02749	Beta-2-glycoprotein 1 (APC inhibitor) (Activated protein C-binding protein) (Anticardiolipin cofactor) (Apolipoprotein H) (Apo-H) (Beta-2-glycoprotein I) (B2GPI) (Beta(2)GPI)
sp|P02753|RET4_HUMAN	5.03413e+06	5.13637e+06	4.88228e+06	4.61444e+06	4.90483e+06	4.6154e+06	4.52689e+06	4.68719e+06	4.27472e+06	4.59127e+06	3.99229e+06	4.7551e+06	3.83288e+06	3.68375e+06	4.05196e+06	P02753	Retinol-binding protein 4 (Plasma retinol-binding protein) (PRBP) (RBP) [Cleaved into: Plasma retinol-binding protein(1-182); Plasma retinol-binding protein(1-181); Plasma retinol-binding protein(1-179); Plasma retinol-binding protein(1-176)]
sp|P02760|AMBP_HUMAN	9.61244e+06	8.84992e+06	8.97907e+06	8.82831e+06	9.13048e+06	9.0571e+06	8.19745e+06	9.78759e+06	1.0025e+07	9.84796e+06	9.45655e+06	9.9917e+06	8.94575e+06	8.61194e+06	8.54663e+06	P02760	Protein AMBP [Cleaved into: Alpha-1-microglobulin (Protein HC) (Alpha-1 microglycoprotein) (Complex-forming glycoprotein heterogeneous in charge); Inter-alpha-trypsin inhibitor light chain (ITI-LC) (Bikunin) (EDC1) (HI-30) (Uronic-acid-rich protein); Trypstatin]
sp|P02766|TTHY_HUMAN	536099	414744	363674	516374	542608	660535	418355	478929	483987	541694	342045	515838	474283	564459	503739	P02766	Transthyretin (ATTR) (Prealbumin) (TBPA)
sp|P02768|ALBU_HUMAN	4.27908e+08	4.84432e+08	4.77902e+08	4.44156e+08	3.87219e+08	4.35945e+08	4.7909e+08	3.77897e+08	3.74514e+08	3.7456e+08	4.1916e+08	3.66073e+08	3.92842e+08	4.4082e+08	4.35829e+08	P02768	Serum albumin
sp|P02774|VTDB_HUMAN	3.76743e+06	3.89011e+06	3.87822e+06	4.89515e+06	5.59177e+06	5.85071e+06	3.60752e+06	4.72637e+06	3.44432e+06	5.02296e+06	4.20155e+06	4.9128e+06	4.07138e+06	3.71364e+06	3.47947e+06	P02774	Vitamin D-binding protein (DBP) (VDB) (Gc protein-derived macrophage activating factor) (Gc-MAF) (GcMAF) (Gc-globulin) (Group-specific component) (Gc) (Vitamin D-binding protein-macrophage activating factor) (DBP-maf)
sp|P02776|PLF4_HUMAN	115403	104742	92910	112847	126516	92307.9	96104.6	107429	104925	99348.4	78884.9	100896	101513	125613	175967	P02776	Platelet factor 4 (PF-4) (C-X-C motif chemokine 4) (Iroplact) (Oncostatin-A) [Cleaved into: Platelet factor 4, short form]
sp|P02786|TFR1_HUMAN	6143.72	47080.8	3721.92	1404.88	1636	43660.7	74366.9	67397.1	71757.1	1762.04	49902	40498.4	47524.4	59858.8	8294.49	P02786	Transferrin receptor protein 1 (TR) (TfR) (TfR1) (Trfr) (T9) (p90) (CD antigen CD71) [Cleaved into: Transferrin receptor protein 1, serum form (sTfR)]
sp|P02787|TRFE_HUMAN	1.24985e+08	1.21054e+08	1.19767e+08	1.36225e+08	1.46636e+08	1.3679e+08	1.37128e+08	1.41239e+08	1.51513e+08	1.47157e+08	1.42861e+08	1.55194e+08	1.28165e+08	1.27677e+08	1.23891e+08	P02787	Serotransferrin (Transferrin) (Beta-1 metal-binding globulin) (Siderophilin)
sp|P02790|HEMO_HUMAN	1.60363e+07	1.46966e+07	1.5109e+07	1.4135e+07	1.41035e+07	1.54961e+07	1.37152e+07	1.63614e+07	1.45383e+07	1.72778e+07	1.49281e+07	1.73845e+07	1.5838e+07	1.43591e+07	1.41959e+07	P02790	Hemopexin (Beta-1B-glycoprotein)
sp|P03950|ANGI_HUMAN	3163.47	9700.28	2894.88	36735.1	36670.4	9783.68	8927.33	36004.5	7473.05	11312.4	13483.3	15705	3697.11	9382.4	11482.5	P03950	Angiogenin (EC 3.1.27.-) (Ribonuclease 5) (RNase 5)
sp|P03952|KLKB1_HUMAN	2.43496e+06	2.10419e+06	2.01848e+06	2.20647e+06	2.4982e+06	2.36666e+06	2.18192e+06	2.53528e+06	2.70202e+06	2.69324e+06	2.18525e+06	2.78918e+06	2.28521e+06	2.14423e+06	2.27892e+06	P03952	Plasma kallikrein (EC 3.4.21.34) (Fletcher factor) (Kininogenin) (Plasma prekallikrein) (PKK) [Cleaved into: Plasma kallikrein heavy chain; Plasma kallikrein light chain]
sp|P03973|SLPI_HUMAN	10335.1	13241.5	5421.52	12168.5	12769	9982.83	7522.84	10126.3	3954.06	10033.8	9491.51	14692.1	10094	8759.92	13781.5	P03973	Antileukoproteinase (ALP) (BLPI) (HUSI-1) (Mucus proteinase inhibitor) (MPI) (Protease inhibitor WAP4) (Secretory leukocyte protease inhibitor) (Seminal proteinase inhibitor) (WAP four-disulfide core domain protein 4)
sp|P04003|C4BPA_HUMAN	4.85562e+06	4.58992e+06	4.66167e+06	5.13256e+06	5.5267e+06	4.69848e+06	3.93351e+06	4.92938e+06	4.77607e+06	6.83376e+06	6.20406e+06	6.80871e+06	5.6823e+06	5.08859e+06	4.71816e+06	P04003	C4b-binding protein alpha chain (C4bp) (Proline-rich protein) (PRP)
sp|P04004|VTNC_HUMAN	7.59233e+06	8.53803e+06	7.09196e+06	7.68815e+06	8.93498e+06	7.67039e+06	7.82702e+06	8.53177e+06	8.20014e+06	8.53284e+06	8.06927e+06	8.76558e+06	8.18667e+06	8.65491e+06	8.02195e+06	P04004	Vitronectin (VN) (S-protein) (Serum-spreading factor) (V75) [Cleaved into: Vitronectin V65 subunit; Vitronectin V10 subunit; Somatomedin-B]
sp|P04040|CATA_HUMAN	2577.29	43287.7	5664.85	1355.83	1346.73	1161.9	31226	40643.2	2480.24	4034.23	2494.64	4638.05	2212.38	39712.9	35414.5	P04040	Catalase (EC 1.11.1.6)
sp|P04070|PROC_HUMAN	220607	130030	159899	210415	136001	127212	152455	111244	114109	75966.6	118458	161510	114685	109235	121629	P04070	Vitamin K-dependent protein C (EC 3.4.21.69) (Anticoagulant protein C) (Autoprothrombin IIA) (Blood coagulation factor XIV) [Cleaved into: Vitamin K-dependent protein C light chain; Vitamin K-dependent protein C heavy chain; Activation peptide]
sp|P04114|APOB_HUMAN	1.44027e+06	1.11269e+06	1.93642e+06	1.80965e+06	1.37097e+06	1.55499e+06	1.23209e+06	1.25745e+06	1.73637e+06	1.13005e+06	1.35379e+06	1.33269e+06	1.17117e+06	1.32489e+06	1.45766e+06	P04114	Apolipoprotein B-100 (Apo B-100) [Cleaved into: Apolipoprotein B-48 (Apo B-48)]
sp|P04180|LCAT_HUMAN	17510.6	21771.4	16090.3	29248.8	24788.9	20301.4	20547.8	20527.9	19789.9	16095.1	25419.9	21672.9	18892.1	18877.3	21350.5	P04180	Phosphatidylcholine-sterol acyltransferase (EC 2.3.1.43) (Lecithin-cholesterol acyltransferase) (Phospholipid-cholesterol acyltransferase)
sp|P04196|HRG_HUMAN	3.70175e+06	3.75237e+06	3.88223e+06	3.16687e+06	3.53032e+06	5.90445e+06	3.0661e+06	3.22439e+06	3.32397e+06	3.99792e+06	3.5571e+06	3.4798e+06	3.0195e+06	2.82043e+06	2.71164e+06	P04196	Histidine-rich glycoprotein (Histidine-proline-rich glycoprotein) (HPRG)
sp|P04208|LV106_HUMAN	486695	425867	402354	292516	318547	308016	215997	345993	345550	316598	273791	354886	387580	340756	303932	P04208	Ig lambda chain V-I region WAH
sp|P04217|A1BG_HUMAN	6.08936e+06	4.64297e+06	5.09099e+06	3.5063e+06	4.63221e+06	4.25528e+06	4.51995e+06	5.65779e+06	5.18367e+06	6.10863e+06	4.87913e+06	4.75503e+06	4.27931e+06	4.71902e+06	5.79509e+06	P04217	Alpha-1B-glycoprotein (Alpha-1-B glycoprotein)
sp|P04220|MUCB_HUMAN	3.28504e+06	2.90711e+06	2.76808e+06	2.35211e+06	2.6033e+06	1.96555e+06	1.86689e+06	2.63817e+06	2.79642e+06	2.38697e+06	2.26772e+06	2.87989e+06	3.78418e+06	3.00613e+06	3.01667e+06	P04220	Ig mu heavy chain disease protein (BOT)
sp|P04275|VWF_HUMAN	1.70017e+06	1.48951e+06	1.51729e+06	1.59312e+06	1.74619e+06	1.37613e+06	1.41744e+06	1.6907e+06	1.79726e+06	1.71379e+06	1.51603e+06	1.87215e+06	1.53104e+06	1.25301e+06	1.24089e+06	P04275	von Willebrand factor (vWF) [Cleaved into: von Willebrand antigen 2 (von Willebrand antigen II)]
sp|P04278|SHBG_HUMAN	149801	166405	125517	117956	135030	125945	138053	86928.3	124006	142034	113958	143806	140762	87803.9	158406	P04278	Sex hormone-binding globulin (SHBG) (Sex steroid-binding protein) (SBP) (Testis-specific androgen-binding protein) (ABP) (Testosterone-estradiol-binding globulin) (TeBG) (Testosterone-estrogen-binding globulin)
sp|P05062|ALDOB_HUMAN	289832	291696	253313	298326	334751	352400	212689	266756	249853	315510	320183	324586	265243	258884	281439	P05062	Fructose-bisphosphate aldolase B (EC 4.1.2.13) (Liver-type aldolase)
sp|P05154|IPSP_HUMAN	20001.8	9559.04	21111.7	19179.6	26322.5	21608.1	19947.5	31948.4	16109.2	32349.6	6833.68	21910.4	24884.4	21850.7	110876	P05154	Plasma serine protease inhibitor (Acrosomal serine protease inhibitor) (Plasminogen activator inhibitor 3) (PAI-3) (PAI3) (Protein C inhibitor) (PCI) (Serpin A5)
sp|P05155|IC1_HUMAN	5.10516e+06	5.15482e+06	5.1981e+06	4.75821e+06	5.0613e+06	4.26711e+06	5.03124e+06	5.32902e+06	5.34791e+06	5.6999e+06	5.57977e+06	5.45156e+06	5.03867e+06	4.89781e+06	5.29896e+06	P05155	Plasma protease C1 inhibitor (C1 Inh) (C1Inh) (C1 esterase inhibitor) (C1-inhibiting factor) (Serpin G1)
sp|P05156|CFAI_HUMAN	2.99039e+06	3.00417e+06	3.09116e+06	2.94422e+06	3.24819e+06	2.99994e+06	2.74785e+06	2.94386e+06	3.03591e+06	3.24444e+06	2.5885e+06	3.51169e+06	3.00764e+06	2.95855e+06	3.04129e+06	P05156	Complement factor I (EC 3.4.21.45) (C3B/C4B inactivator) [Cleaved into: Complement factor I heavy chain; Complement factor I light chain]
sp|P05362|ICAM1_HUMAN	1019.62	92243.5	2060.53	1239.33	6606.69	3458.21	134449	112848	4525.69	39739.5	28135.9	31982	22118.1	8805.53	5620.8	P05362	Intercellular adhesion molecule 1 (ICAM-1) (Major group rhinovirus receptor) (CD antigen CD54)
sp|P05452|TETN_HUMAN	465642	732492	789033	561482	552398	623991	450740	580702	382924	549338	509023	476716	530727	510124	528409	P05452	Tetranectin (TN) (C-type lectin domain family 3 member B) (Plasminogen kringle 4-binding protein)
sp|P05546|HEP2_HUMAN	49340.4	466736	127267	164878	137056	141086	139059	150315	112992	129579	87174.9	151779	145801	73872.4	145952	P05546	Heparin cofactor 2 (Heparin cofactor II) (HC-II) (Protease inhibitor leuserpin-2) (HLS2) (Serpin D1)
sp|P06396|GELS_HUMAN	759993	711227	577882	710818	738328	744870	904746	741924	857453	908032	788769	890979	663489	796044	809976	P06396	Gelsolin (AGEL) (Actin-depolymerizing factor) (ADF) (Brevin)
sp|P06681|CO2_HUMAN	685546	634301	717286	722521	627209	715399	661803	802531	622110	850829	769867	702222	590764	611706	752656	P06681	Complement C2 (EC 3.4.21.43) (C3/C5 convertase) [Cleaved into: Complement C2b fragment; Complement C2a fragment]
sp|P06727|APOA4_HUMAN	1.69984e+06	1.54964e+06	1.88446e+06	1.36448e+06	1.55701e+06	1.19993e+06	1.28236e+06	1.45992e+06	1.538e+06	996280	1.36648e+06	1.5515e+06	1.15782e+06	1.16168e+06	1.20001e+06	P06727	Apolipoprotein A-IV (Apo-AIV) (ApoA-IV) (Apolipoprotein A4)
sp|P06733|ENOA_HUMAN	42912.8	75665.6	31414	15046.3	42620	24724.6	27560.2	59916.7	82048.9	23656.6	19297.6	72161.6	2326.69	38044.8	25183.4	P06733	Alpha-enolase (EC 4.2.1.11) (2-phospho-D-glycerate hydro-lyase) (C-myc promoter-binding protein) (Enolase 1) (MBP-1) (MPB-1) (Non-neural enolase) (NNE) (Phosphopyruvate hydratase) (Plasminogen-binding protein)
sp|P07225|PROS_HUMAN	1.8078e+06	1.5699e+06	1.42159e+06	1.56477e+06	1.67755e+06	1.53872e+06	1.37763e+06	1.64081e+06	1.77457e+06	1.60984e+06	1.71221e+06	1.94783e+06	1.60667e+06	1.467e+06	1.43544e+06	P07225	Vitamin K-dependent protein S
sp|P07237|PDIA1_HUMAN	45142.2	9206.14	4930.22	3762.42	2075.96	20913.6	19992.4	21953.4	7478.77	37078.1	8301.27	3022.37	24741.3	26352	31858.4	P07237	Protein disulfide-isomerase (PDI) (EC 5.3.4.1) (Cellular thyroid hormone-binding protein) (Prolyl 4-hydroxylase subunit beta) (p55)
sp|P07357|CO8A_HUMAN	1.42134e+06	1.49157e+06	945521	948318	1.16583e+06	1.31923e+06	999729	1.04554e+06	1.11421e+06	827876	1.13262e+06	982515	1.28385e+06	885115	1.48601e+06	P07357	Complement component C8 alpha chain (Complement component 8 subunit alpha)
sp|P07358|CO8B_HUMAN	1.06052e+06	930917	912944	1.00238e+06	1.16024e+06	813857	756692	979445	1.01869e+06	1.04923e+06	747547	945337	858744	861970	784609	P07358	Complement component C8 beta chain (Complement component 8 subunit beta)
sp|P07360|CO8G_HUMAN	602422	478287	767684	704902	663876	832217	835423	597160	678082	501493	679432	767348	682780	711931	800257	P07360	Complement component C8 gamma chain
sp|P07477|TRY1_HUMAN	2.06169e+07	1.78317e+07	2.37363e+07	2.17996e+07	1.98261e+07	2.20749e+07	2.26202e+07	1.95821e+07	1.87196e+07	1.79218e+07	1.66912e+07	1.57657e+07	1.68188e+07	1.772e+07	1.82605e+07	P07477	Trypsin-1 (EC 3.4.21.4) (Beta-trypsin) (Cationic trypsinogen) (Serine protease 1) (Trypsin I) [Cleaved into: Alpha-trypsin chain 1; Alpha-trypsin chain 2]
sp|P07478|TRY2_HUMAN	1.89057e+07	1.9538e+07	1.90318e+07	1.88443e+07	1.89428e+07	1.99073e+07	1.8078e+07	1.99199e+07	1.18818e+07	1.56176e+07	1.54158e+07	1.34318e+07	1.66059e+07	1.42544e+07	1.47714e+07	P07478	Trypsin-2 (EC 3.4.21.4) (Anionic trypsinogen) (Serine protease 2) (Trypsin II)
sp|P07737|PROF1_HUMAN	5993.7	7014.43	1265.75	10616	10585.8	9268.3	17425.6	19052.1	14349	10185.3	2727.21	6256.02	3192.34	8735.69	14636.4	P07737	Profilin-1 (Epididymis tissue protein Li 184a) (Profilin I)
sp|P07858|CATB_HUMAN	11116.4	22222.8	21673.3	16528.6	14236.3	29866.8	6904.63	8466.85	7004.46	17485.4	5305.18	6760.01	17350.9	23617	5808.54	P07858	Cathepsin B (EC 3.4.22.1) (APP secretase) (APPS) (Cathepsin B1) [Cleaved into: Cathepsin B light chain; Cathepsin B heavy chain]
sp|P07996|TSP1_HUMAN	1.01706e+06	125413	994582	923747	958992	1.00081e+06	633065	813018	202935	998822	986451	1.05126e+06	388815	979970	953322	P07996	Thrombospondin-1
sp|P08493|MGP_HUMAN	10804	6932.76	5341.97	7787.88	7823.26	6558.52	5667.26	8143.96	10732.3	7016.32	6548.07	10108.5	2957.71	3857.6	5548.44	P08493	Matrix Gla protein (MGP) (Cell growth-inhibiting gene 36 protein)
sp|P08571|CD14_HUMAN	80319.2	88949	102685	115224	71494.1	85626.6	134582	117272	72628.1	84929.2	108236	127927	131139	93410.8	146448	P08571	Monocyte differentiation antigen CD14 (Myeloid cell-specific leucine-rich glycoprotein) (CD antigen CD14) [Cleaved into: Monocyte differentiation antigen CD14, urinary form; Monocyte differentiation antigen CD14, membrane-bound form]
sp|P08603|CFAH_HUMAN	4.16954e+06	3.86143e+06	3.94778e+06	4.50223e+06	4.11106e+06	4.42144e+06	3.72804e+06	3.59274e+06	3.35098e+06	4.15669e+06	3.86063e+06	4.30746e+06	3.99061e+06	4.02445e+06	4.04508e+06	P08603	Complement factor H (H factor 1)
sp|P08697|A2AP_HUMAN	860072	1.75164e+06	1.72388e+06	1.98261e+06	875673	860887	798391	815931	832155	845238	2.05413e+06	1.54875e+06	623050	829924	810256	P08697	Alpha-2-antiplasmin (Alpha-2-AP) (Alpha-2-plasmin inhibitor) (Alpha-2-PI) (Serpin F2)
sp|P09104|ENOG_HUMAN	4210.28	11846.1	15326.9	2778.65	5434.55	9422.94	3959.92	2641.44	9713.09	1419.5	7134.54	2147.25	10382.7	4680.16	10271	P09104	Gamma-enolase (EC 4.2.1.11) (2-phospho-D-glycerate hydro-lyase) (Enolase 2) (Neural enolase) (Neuron-specific enolase) (NSE)
sp|P09172|DOPO_HUMAN	25754.7	12450.6	47517	52238.6	35072.9	21172.2	24487.1	33638.1	43623.2	39147.1	39139.4	40200	14209.3	31949.9	64323.2	P09172	Dopamine beta-hydroxylase (EC 1.14.17.1) (Dopamine beta-monooxygenase) [Cleaved into: Soluble dopamine beta-hydroxylase]
sp|P09486|SPRC_HUMAN	64780.6	47859.5	27504	68769.4	5898	35159	56912.7	28311.8	12951.6	14302.6	19051.1	81579.5	66566.6	48785.4	34182.1	P09486	SPARC (Basement-membrane protein 40) (BM-40) (Osteonectin) (ON) (Secreted protein acidic and rich in cysteine)
sp|P09871|C1S_HUMAN	4.86932e+06	3.90648e+06	4.12532e+06	3.29451e+06	3.74627e+06	2.63032e+06	3.76916e+06	3.8749e+06	4.37032e+06	4.07482e+06	4.05797e+06	4.89668e+06	3.68179e+06	3.77934e+06	3.781e+06	P09871	Complement C1s subcomponent (EC 3.4.21.42) (C1 esterase) (Complement component 1 subcomponent s) [Cleaved into: Complement C1s subcomponent heavy chain; Complement C1s subcomponent light chain]
sp|P0C0L4|CO4A_HUMAN	1.07992e+07	1.01797e+07	1.03754e+07	1.06554e+07	1.23198e+07	1.18468e+07	9.36562e+06	1.07973e+07	9.42088e+06	1.23567e+07	1.19325e+07	1.23251e+07	1.1011e+07	1.02451e+07	1.09833e+07	P0C0L4	Complement C4-A (Acidic complement C4) (C3 and PZP-like alpha-2-macroglobulin domain-containing protein 2) [Cleaved into: Complement C4 beta chain; Complement C4-A alpha chain; C4a anaphylatoxin; C4b-A; C4d-A; Complement C4 gamma chain]
sp|P0C0L5|CO4B_HUMAN	5.95462e+06	5.29219e+06	5.48111e+06	5.86813e+06	7.18819e+06	7.35391e+06	5.00983e+06	5.16742e+06	4.99121e+06	6.78851e+06	6.38218e+06	5.74732e+06	6.65007e+06	6.69199e+06	6.0078e+06	P0C0L5	Complement C4-B (Basic complement C4) (C3 and PZP-like alpha-2-macroglobulin domain-containing protein 3) [Cleaved into: Complement C4 beta chain; Complement C4-B alpha chain; C4a anaphylatoxin; C4b-B; C4d-B; Complement C4 gamma chain]
sp|P0CG05|LAC2_HUMAN	1.32475e+06	1.20474e+06	1.24231e+06	1.2245e+06	1.44608e+06	1.57231e+06	951146	1.44027e+06	1.14647e+06	1.72322e+06	1.10048e+06	1.54688e+06	1.69517e+06	1.37011e+06	1.40009e+06	P0CG05	Ig lambda-2 chain C regions
sp|P0CG06|LAC3_HUMAN	753453	597221	554663	668608	716616	616132	420758	552185	598327	713190	503952	595017	857346	671225	792311	P0CG06	Ig lambda-3 chain C regions
sp|P10451|OSTP_HUMAN	12093.4	24860.9	2535.05	8039.92	4975.08	11374.9	10656.4	8497.02	14455.1	3392.99	2715.8	9031.56	6703.99	6138.95	8898.73	P10451	Osteopontin (Bone sialoprotein 1) (Nephropontin) (Secreted phosphoprotein 1) (SPP-1) (Urinary stone protein) (Uropontin)
sp|P10643|CO7_HUMAN	2.16444e+06	1.74391e+06	1.10243e+06	1.87031e+06	1.7881e+06	1.77076e+06	1.80702e+06	1.87227e+06	1.10747e+06	1.1031e+06	1.77304e+06	1.84309e+06	1.67009e+06	1.63945e+06	1.81306e+06	P10643	Complement component C7
sp|P10909|CLUS_HUMAN	3.89806e+06	3.50065e+06	3.87868e+06	3.50625e+06	3.45661e+06	3.15538e+06	3.77678e+06	3.0625e+06	3.64091e+06	3.12464e+06	3.75101e+06	3.39403e+06	2.91762e+06	3.60572e+06	3.8122e+06	P10909	Clusterin (Aging-associated gene 4 protein) (Apolipoprotein J) (Apo-J) (Complement cytolysis inhibitor) (CLI) (Complement-associated protein SP-40,40) (Ku70-binding protein 1) (NA1/NA2) (Testosterone-repressed prostate message 2) (TRPM-2) [Cleaved into: Clusterin beta chain (ApoJalpha) (Complement cytolysis inhibitor a chain); Clusterin alpha chain (ApoJbeta) (Complement cytolysis inhibitor b cha…
sp|P11021|GRP78_HUMAN	11340.3	26145.9	29531.4	32423.8	2176.82	31552.4	7357.06	27386.5	14876.2	4228.45	22059.1	2347.76	26140.4	19141.5	2894.66	P11021	78 kDa glucose-regulated protein (GRP-78) (Endoplasmic reticulum lumenal Ca(2+)-binding protein grp78) (Heat shock 70 kDa protein 5) (Immunoglobulin heavy chain-binding protein) (BiP)
sp|P11047|LAMC1_HUMAN	173527	143125	49074.9	24789.4	29887.8	25253.4	89879.6	7167.8	78942.8	4917.33	8818.01	96732.4	4508.68	87956.1	111676	P11047	Laminin subunit gamma-1 (Laminin B2 chain) (Laminin-1 subunit gamma) (Laminin-10 subunit gamma) (Laminin-11 subunit gamma) (Laminin-2 subunit gamma) (Laminin-3 subunit gamma) (Laminin-4 subunit gamma) (Laminin-6 subunit gamma) (Laminin-7 subunit gamma) (Laminin-8 subunit gamma) (Laminin-9 subunit gamma) (S-laminin subunit gamma) (S-LAM gamma)
sp|P11226|MBL2_HUMAN	15139.7	14813.3	14284.3	9458.24	14321.4	9551.21	12087.7	19146.1	19371.2	11378.5	16735.4	18054.2	15906.5	14759.2	13789.4	P11226	Mannose-binding protein C (MBP-C) (Collectin-1) (MBP1) (Mannan-binding protein) (Mannose-binding lectin)
sp|P11362|FGFR1_HUMAN	33342.4	4419.33	35357.3	31729.7	16635	22674.5	38730.4	16731.7	62406.2	15393.7	10795.9	12141.1	16577.3	3172.04	13283.9	P11362	Fibroblast growth factor receptor 1 (FGFR-1) (EC 2.7.10.1) (Basic fibroblast growth factor receptor 1) (BFGFR) (bFGF-R-1) (Fms-like tyrosine kinase 2) (FLT-2) (N-sam) (Proto-oncogene c-Fgr) (CD antigen CD331)
sp|P12259|FA5_HUMAN	379808	246280	401254	330541	356786	209678	349666	365660	267543	306144	395346	337581	283073	421153	337162	P12259	Coagulation factor V (Activated protein C cofactor) (Proaccelerin, labile factor) [Cleaved into: Coagulation factor V heavy chain; Coagulation factor V light chain]
sp|P13473|LAMP2_HUMAN	116742	129588	127671	9838.31	5099.36	57479.6	8971.51	114675	101224	9639.66	80533.4	6913.14	56240.7	7600.82	9740.92	P13473	Lysosome-associated membrane glycoprotein 2 (LAMP-2) (Lysosome-associated membrane protein 2) (CD107 antigen-like family member B) (CD antigen CD107b)
sp|P13645|K1C10_HUMAN	29014.5	4649.37	1837.46	3775.63	16313.8	15196.6	4059.63	1832.18	9125.42	1827.42	8672.25	6154.45	31013.5	29126.6	26032	P13645	Keratin, type I cytoskeletal 10 (Cytokeratin-10) (CK-10) (Keratin-10) (K10)
sp|P13671|CO6_HUMAN	2.83053e+06	2.90438e+06	2.78508e+06	2.54112e+06	2.05748e+06	2.14057e+06	2.3739e+06	2.61503e+06	3.15795e+06	2.6638e+06	3.06931e+06	3.06835e+06	2.6845e+06	2.64891e+06	2.69517e+06	P13671	Complement component C6
sp|P15169|CBPN_HUMAN	324036	408203	204885	206180	302965	378442	284181	216943	274555	171950	370810	245201	340475	188064	204331	P15169	Carboxypeptidase N catalytic chain (CPN) (EC 3.4.17.3) (Anaphylatoxin inactivator) (Arginine carboxypeptidase) (Carboxypeptidase N polypeptide 1) (Carboxypeptidase N small subunit) (Kininase-1) (Lysine carboxypeptidase) (Plasma carboxypeptidase B) (Serum carboxypeptidase N) (SCPN)
sp|P16070|CD44_HUMAN	97345	88354.7	86643.2	71301.9	77197.9	58245.1	73861.3	78077.2	82960.8	88517.9	83151.4	96514.8	70444.8	71298.2	73030.4	P16070	CD44 antigen (CDw44) (Epican) (Extracellular matrix receptor III) (ECMR-III) (GP90 lymphocyte homing/adhesion receptor) (HUTCH-I) (Heparan sulfate proteoglycan) (Hermes antigen) (Hyaluronate receptor) (Phagocytic glycoprotein 1) (PGP-1) (Phagocytic glycoprotein I) (PGP-I) (CD antigen CD44)
sp|P16581|LYAM2_HUMAN	55666	94214.7	85849.1	88056	74827.3	98826.2	5930.74	77187.5	68642.3	98268.6	71475.1	24054.2	73308.1	46677.4	69827.8	P16581	E-selectin (CD62 antigen-like family member E) (Endothelial leukocyte adhesion molecule 1) (ELAM-1) (Leukocyte-endothelial cell adhesion molecule 2) (LECAM2) (CD antigen CD62E)
sp|P17813|EGLN_HUMAN	7042.93	11737.5	10044.3	4912.7	2319.39	7739.85	9934.25	929.397	3445.02	3201.82	5866.47	3522.92	3074.89	1485.66	6319.82	P17813	Endoglin (CD antigen CD105)
sp|P17936|IBP3_HUMAN	585428	757110	500765	351481	546824	476905	517653	554792	391954	211421	457988	411764	366347	479337	516649	P17936	Insulin-like growth factor-binding protein 3 (IBP-3) (IGF-binding protein 3) (IGFBP-3)
sp|P18065|IBP2_HUMAN	187732	254795	79853.9	206090	175554	94135.5	90376.3	358706	177140	117653	20525	140283	116683	198076	189856	P18065	Insulin-like growth factor-binding protein 2 (IBP-2) (IGF-binding protein 2) (IGFBP-2)
sp|P18136|KV313_HUMAN	2.17665e+06	2.51664e+06	2.31885e+06	2.29007e+06	1.82691e+06	1.87158e+06	2.2938e+06	1.82085e+06	1.80677e+06	1.71896e+06	2.25932e+06	1.91464e+06	2.53681e+06	3.03467e+06	3.11578e+06	P18136	Ig kappa chain V-III region HIC
sp|P18206|VINC_HUMAN	799.173	260.368	843.369	570.373	564.864	1064.2	607.087	1445.37	826.651	1389.78	857.73	399.207	668.645	775.749	793.23	P18206	Vinculin (Metavinculin) (MV)
sp|P18428|LBP_HUMAN	19130.1	15417.1	19936.3	3153.91	10863.1	25232.5	36605.9	33849.8	33046.6	21633.7	3629.12	17710.4	28455.9	9166.49	40966.3	P18428	Lipopolysaccharide-binding protein (LBP)
sp|P19022|CADH2_HUMAN	32025.9	63450.5	36843.6	35596.9	33467.9	4329.85	38815.1	53997.3	52418.3	55421.4	39543.6	26765.9	32627.4	4088.53	17488.2	P19022	Cadherin-2 (CDw325) (Neural cadherin) (N-cadherin) (CD antigen CD325)
sp|P19320|VCAM1_HUMAN	241603	176336	144778	95303.7	98572.1	202893	196097	149081	129457	146876	172923	136671	73595.7	159380	218790	P19320	Vascular cell adhesion protein 1 (V-CAM 1) (VCAM-1) (INCAM-100) (CD antigen CD106)
sp|P19823|ITIH2_HUMAN	1.24727e+07	1.26753e+07	1.24358e+07	1.23971e+07	1.31566e+07	1.19251e+07	8.34705e+06	1.29911e+07	8.67734e+06	1.19157e+07	1.19636e+07	1.23439e+07	1.12702e+07	1.12392e+07	1.15008e+07	P19823	Inter-alpha-trypsin inhibitor heavy chain H2 (ITI heavy chain H2) (ITI-HC2) (Inter-alpha-inhibitor heavy chain 2) (Inter-alpha-trypsin inhibitor complex component II) (Serum-derived hyaluronan-associated protein) (SHAP)
sp|P19827|ITIH1_HUMAN	4.51096e+06	4.18342e+06	4.58075e+06	4.23454e+06	4.79595e+06	4.15374e+06	3.61251e+06	4.27153e+06	4.59442e+06	5.00003e+06	4.39352e+06	5.19901e+06	4.33375e+06	3.90975e+06	3.64663e+06	P19827	Inter-alpha-trypsin inhibitor heavy chain H1 (ITI heavy chain H1) (ITI-HC1) (Inter-alpha-inhibitor heavy chain 1) (Inter-alpha-trypsin inhibitor complex component III) (Serum-derived hyaluronan-associated protein) (SHAP)
sp|P20742|PZP_HUMAN	275204	111987	330554	213558	204983	258391	94497.8	296090	203681	412196	221957	100916	51747.8	82661.2	261335	P20742	Pregnancy zone protein (C3 and PZP-like alpha-2-macroglobulin domain-containing protein 6)
sp|P20851|C4BPB_HUMAN	544326	498884	492260	561597	512468	524978	449719	645491	424522	527747	443536	570589	572076	525060	510478	P20851	C4b-binding protein beta chain
sp|P21333|FLNA_HUMAN	66842.6	39853.7	63692.2	78785.7	29724.9	71000.7	68001.3	64085.5	68136.9	98181.6	52047	55550.7	88911.3	64457.8	29893.2	P21333	Filamin-A (FLN-A) (Actin-binding protein 280) (ABP-280) (Alpha-filamin) (Endothelial actin-binding protein) (Filamin-1) (Non-muscle filamin)
sp|P22352|GPX3_HUMAN	37892.2	5448.18	25770	30991.5	34026.8	174006	32992.8	31987.5	5229.84	66304.1	33608	35228.8	33765.8	26768.9	6058.21	P22352	Glutathione peroxidase 3 (GPx-3) (GSHPx-3) (EC 1.11.1.9) (Extracellular glutathione peroxidase) (Plasma glutathione peroxidase) (GPx-P) (GSHPx-P)
sp|P22692|IBP4_HUMAN	9717.46	15668.4	91789	27009.2	10891.8	47134.5	4149.27	35742.1	36116.3	65244.4	18812.1	15346.5	66526.3	59431.8	65670.3	P22692	Insulin-like growth factor-binding protein 4 (IBP-4) (IGF-binding protein 4) (IGFBP-4)
sp|P22891|PROZ_HUMAN	78381	82756.5	75040.4	106028	89028.6	88898	80076.5	65077.1	55147.2	104114	87577.9	95160.1	80983.7	79710.2	91913.5	P22891	Vitamin K-dependent protein Z
sp|P23142|FBLN1_HUMAN	1.32835e+06	1.16046e+06	1.18109e+06	1.02928e+06	1.24435e+06	932951	690985	690706	1.09999e+06	798441	991691	925114	985461	868661	642613	P23142	Fibulin-1 (FIBL-1)
sp|P23528|COF1_HUMAN	46547.8	15298.5	38871.6	22672.4	21479.6	19950.2	75394.1	36273.6	75596.4	92249.8	24267.5	7524.59	18525.7	22886.6	22156.4	P23528	Cofilin-1 (18 kDa phosphoprotein) (p18) (Cofilin, non-muscle isoform)
sp|P24593|IBP5_HUMAN	6228.06	6416.92	8806.34	1982.8	6455.64	4266.69	2321.89	2633.86	6064	1111.2	4713.07	6055.18	4986.86	2747.26	623.143	P24593	Insulin-like growth factor-binding protein 5 (IBP-5) (IGF-binding protein 5) (IGFBP-5)
sp|P25311|ZA2G_HUMAN	10842.9	14305.2	1316.34	15928.1	14067	3638.94	7648.42	6291.47	3685.63	15182.2	4988.21	9826.36	14357.8	10876.2	11588.8	P25311	Zinc-alpha-2-glycoprotein (Zn-alpha-2-GP) (Zn-alpha-2-glycoprotein)
sp|P26038|MOES_HUMAN	11190.3	1261.1	2403.09	2467.99	6455.53	14033.3	11246.7	2502.53	6653.8	11062.5	3106.84	7552	3729.72	18566	13177.4	P26038	Moesin (Membrane-organizing extension spike protein)
sp|P27169|PON1_HUMAN	1.29881e+06	1.44338e+06	1.36956e+06	1.44606e+06	1.35673e+06	1.2555e+06	1.31207e+06	1.02454e+06	1.0971e+06	1.06282e+06	1.47582e+06	1.03206e+06	1.1261e+06	1.1375e+06	1.36254e+06	P27169	Serum paraoxonase/arylesterase 1 (PON 1) (EC 3.1.1.2) (EC 3.1.1.81) (EC 3.1.8.1) (Aromatic esterase 1) (A-esterase 1) (K-45) (Serum aryldialkylphosphatase 1)
sp|P27918|PROP_HUMAN	259461	287687	249136	341739	363033	276835	208163	312008	249956	259569	266537	324973	277623	277667	235429	P27918	Properdin (Complement factor P)
sp|P29622|KAIN_HUMAN	4803.31	125922	5645.23	112978	113715	119467	32481.9	146042	101100	168997	62436.3	17880.7	85168.8	78784.5	114200	P29622	Kallistatin (Kallikrein inhibitor) (Peptidase inhibitor 4) (PI-4) (Serpin A4)
sp|P30101|PDIA3_HUMAN	5472.42	119522	16437	78567.2	96216.1	11115.5	67654.9	71985.8	82033.6	8231.52	125152	7147.07	19919.5	4472.89	135378	P30101	Protein disulfide-isomerase A3 (EC 5.3.4.1) (58 kDa glucose-regulated protein) (58 kDa microsomal protein) (p58) (Disulfide isomerase ER-60) (Endoplasmic reticulum resident protein 57) (ER protein 57) (ERp57) (Endoplasmic reticulum resident protein 60) (ER protein 60) (ERp60)
sp|P31146|COR1A_HUMAN	12208.4	18259.8	9402.95	11759.6	17771.2	4725.65	7180.53	12387.8	10875.6	4397.78	11133.3	7569.23	9322.11	3587.46	11669.2	P31146	Coronin-1A (Coronin-like protein A) (Clipin-A) (Coronin-like protein p57) (Tryptophan aspartate-containing coat protein) (TACO)
sp|P32119|PRDX2_HUMAN	11509	2.25967e+06	2.15611e+06	2.20223e+06	2.39534e+06	1.92228e+06	1.88191e+06	2.14788e+06	2.43625e+06	2.44672e+06	2.38507e+06	2.87645e+06	5158.24	1.83667e+06	1.99393e+06	P32119	Peroxiredoxin-2 (EC 1.11.1.15) (Natural killer cell-enhancing factor B) (NKEF-B) (PRP) (Thiol-specific antioxidant protein) (TSA) (Thioredoxin peroxidase 1) (Thioredoxin-dependent peroxide reductase 1)
sp|P33151|CADH5_HUMAN	235895	101538	172847	173259	193077	171323	277752	116168	146827	198535	234781	217065	203550	116236	207539	P33151	Cadherin-5 (7B4 antigen) (Vascular endothelial cadherin) (VE-cadherin) (CD antigen CD144)
sp|P34096|RNAS4_HUMAN	31910.6	24121.1	9346.37	10906	11138	8076.59	6868.47	8226.65	4869.01	5183.6	11860.9	14524.5	12360.9	17919.5	12776.8	P34096	Ribonuclease 4 (RNase 4) (EC 3.1.27.-)
sp|P35443|TSP4_HUMAN	48628.7	39706.7	64636.3	49548.2	208078	26376	44547.1	66634.2	11721.1	21485.8	20222.4	9423.76	16582.1	25584.7	20548.6	P35443	Thrombospondin-4
sp|P35542|SAA4_HUMAN	234029	204735	188543	191569	211986	155036	148638	178546	178856	231959	198037	318608	260676	216365	229673	P35542	Serum amyloid A-4 protein (Constitutively expressed serum amyloid A protein) (C-SAA)
sp|P35858|ALS_HUMAN	718941	558619	553440	518828	575089	603868	495621	625384	497856	681718	560521	625906	552899	566263	451212	P35858	Insulin-like growth factor-binding protein complex acid labile subunit (ALS)
sp|P35916|VGFR3_HUMAN	1.18903e+06	744804	981928	358431	784472	407351	636739	926133	333834	7604.14	563320	488027	617165	354927	456579	P35916	Vascular endothelial growth factor receptor 3 (VEGFR-3) (EC 2.7.10.1) (Fms-like tyrosine kinase 4) (FLT-4) (Tyrosine-protein kinase receptor FLT4)
sp|P36980|FHR2_HUMAN	481274	441311	460300	556214	237088	427546	171379	428718	585720	456253	366203	338325	392232	304887	293924	P36980	Complement factor H-related protein 2 (FHR-2) (DDESK59) (H factor-like 3) (H factor-like protein 2)
sp|P37802|TAGL2_HUMAN	9978.19	44796	12447.1	218117	27813.2	218064	17952.9	476387	13250.8	135246	119087	143319	7767.43	133848	6165.44	P37802	Transgelin-2 (Epididymis tissue protein Li 7e) (SM22-alpha homolog)
sp|P37837|TALDO_HUMAN	34557.1	3148.43	31845.2	3711.65	24350.7	2012.94	955.764	3868.78	17600.9	6205.33	2352.91	13585.8	6003.81	5175.66	2785.79	P37837	Transaldolase (EC 2.2.1.2)
sp|P43121|MUC18_HUMAN	7789.09	30713.1	8054.47	3736.02	9784.23	6295.44	6177.12	10748.9	1511.13	2973.49	8322.02	14922.6	14730	2179.51	12311	P43121	Cell surface glycoprotein MUC18 (Cell surface glycoprotein P1H12) (Melanoma cell adhesion molecule) (Melanoma-associated antigen A32) (Melanoma-associated antigen MUC18) (S-endo 1 endothelial-associated antigen) (CD antigen CD146)
sp|P43251|BTD_HUMAN	55153.7	145959	118852	125054	94331.8	99215.1	117884	74428.3	117614	91108.8	133736	96450.2	87076.1	120023	123442	P43251	Biotinidase (Biotinase) (EC 3.5.1.12)
sp|P43652|AFAM_HUMAN	1.50774e+06	1.74004e+06	1.96423e+06	2.30299e+06	2.0234e+06	2.11686e+06	2.0682e+06	1.78547e+06	2.00757e+06	1.34103e+06	1.73189e+06	1.67583e+06	1.50036e+06	1.81105e+06	1.92284e+06	P43652	Afamin (Alpha-albumin) (Alpha-Alb)
sp|P46087|NOP2_HUMAN	2579.95	3372.77	9526.19	2678.21	844.706	1992.9	1436.76	2835.67	12658.6	1236.7	1666.4	2508.35	1089.14	4880.94	3656.8	P46087	Probable 28S rRNA (cytosine(4447)-C(5))-methyltransferase (EC 2.1.1.-) (Nucleolar protein 1) (Nucleolar protein 2 homolog) (Proliferating-cell nucleolar antigen p120) (Proliferation-associated nucleolar protein p120)
sp|P48740|MASP1_HUMAN	217472	222948	324854	168401	158793	173440	113041	120407	228933	104347	81155.1	181309	62406.6	91494	165841	P48740	Mannan-binding lectin serine protease 1 (EC 3.4.21.-) (Complement factor MASP-3) (Complement-activating component of Ra-reactive factor) (Mannose-binding lectin-associated serine protease 1) (MASP-1) (Mannose-binding protein-associated serine protease) (Ra-reactive factor serine protease p100) (RaRF) (Serine protease 5) [Cleaved into: Mannan-binding lectin serine protease 1 heavy chain; Mannan-bi…
sp|P49591|SYSC_HUMAN	148470	172128	166520	150374	123744	756501	168679	79226.1	145237	120641	177433	116728	99610.3	112299	165860	P49591	Serine--tRNA ligase, cytoplasmic (EC 6.1.1.11) (Seryl-tRNA synthetase) (SerRS) (Seryl-tRNA(Ser/Sec) synthetase)
sp|P49747|COMP_HUMAN	58716.3	35426.5	46284.4	22800.1	85296.3	70821.3	34527.8	45153.7	61585.7	39773.6	46800.5	90376.9	57774.7	48496.5	50273.6	P49747	Cartilage oligomeric matrix protein (COMP) (Thrombospondin-5) (TSP5)
sp|P49908|SEPP1_HUMAN	290020	173378	250726	144838	198683	187031	220078	203937	275014	218887	292415	294294	285497	176192	162963	P49908	Selenoprotein P (SeP)
sp|P54108|CRIS3_HUMAN	66365.8	51067.4	60527.6	5891	46549.3	33170.2	52021.7	40520.8	4934.95	5219.24	56781.8	50576.1	46784.5	54267.8	54825.5	P54108	Cysteine-rich secretory protein 3 (CRISP-3) (Specific granule protein of 28 kDa) (SGP28)
sp|P54289|CA2D1_HUMAN	19128.8	20070.8	22266	19812.7	1859.37	14196	21146.8	1500.16	16253.6	13275.6	19306.3	13556.4	4895.43	4459.1	21557.7	P54289	Voltage-dependent calcium channel subunit alpha-2/delta-1 (Voltage-gated calcium channel subunit alpha-2/delta-1) [Cleaved into: Voltage-dependent calcium channel subunit alpha-2-1; Voltage-dependent calcium channel subunit delta-1]
sp|P54764|EPHA4_HUMAN	10140.2	52177.2	6111.59	58758.6	75441.1	5139.72	50738.5	3054.71	49570.9	9630.71	65614.6	2760.47	44871.2	55910.5	87644.9	P54764	Ephrin type-A receptor 4 (EC 2.7.10.1) (EPH-like kinase 8) (EK8) (hEK8) (Tyrosine-protein kinase TYRO1) (Tyrosine-protein kinase receptor SEK)
sp|P55056|APOC4_HUMAN	9976.62	4798.44	7202.44	2031.28	5753.11	3553.09	6932.42	3497.72	16388.4	5139.89	8581.61	8414	1902.62	13906.9	3868.56	P55056	Apolipoprotein C-IV (Apo-CIV) (ApoC-IV) (Apolipoprotein C4)
sp|P55058|PLTP_HUMAN	17852.6	10279.7	18573.1	14612.4	6742	9902.93	30020.7	13685.2	19841.8	12863.7	13045.5	21627	18171.1	15293.1	18010.5	P55058	Phospholipid transfer protein (Lipid transfer protein II)
sp|P55285|CADH6_HUMAN	10030.2	13196.5	240692	91500.8	46002.2	94897.8	61097.5	111778	77090.1	116352	124753	6274.29	34539.9	91913.2	119210	P55285	Cadherin-6 (Kidney cadherin) (K-cadherin)
sp|P55290|CAD13_HUMAN	2884.76	16890.8	9711.07	21897.9	14824.3	15806.7	2876.16	5087.75	4495.82	6009.33	19723.4	4830.95	2119.43	4910.53	18610	P55290	Cadherin-13 (Heart cadherin) (H-cadherin) (P105) (Truncated cadherin) (T-cad) (T-cadherin)
sp|P59666|DEF3_HUMAN	7964.71	4619.88	592.563	582.634	2250.82	8420	4555.39	2963.99	1281.37	7289.12	4788.09	7198.33	7643.66	6139.07	8749.27	P59666	Neutrophil defensin 3 (Defensin, alpha 3) (HNP-3) (HP-3) (HP3) [Cleaved into: HP 3-56; Neutrophil defensin 2 (HNP-2) (HP-2) (HP2)]
sp|P60709|ACTB_HUMAN	292946	386687	204404	207140	184616	709991	326052	284850	285390	229914	329257	241230	343296	361899	294446	P60709	Actin, cytoplasmic 1 (Beta-actin) [Cleaved into: Actin, cytoplasmic 1, N-terminally processed]
sp|P61626|LYSC_HUMAN	138906	105737	177662	141601	160537	138263	124828	101512	120051	104599	99802.7	126213	118200	97663.7	126077	P61626	Lysozyme C (EC 3.2.1.17) (1,4-beta-N-acetylmuramidase C)
sp|P63104|1433Z_HUMAN	61117.9	56797.9	15070.8	14329.3	15251.4	12367.6	16710.1	25143.7	35486	15239.6	47641.7	9786.42	33139.7	18309.8	18335.3	P63104	14-3-3 protein zeta/delta (Protein kinase C inhibitor protein 1) (KCIP-1)
sp|P63261|ACTG_HUMAN	227962	191935	190246	216156	175831	161824	213619	262040	268811	116201	153767	237557	149780	199715	199806	P63261	Actin, cytoplasmic 2 (Gamma-actin) [Cleaved into: Actin, cytoplasmic 2, N-terminally processed]
sp|P67936|TPM4_HUMAN	69237.5	71065.9	100321	75752.1	72097.1	106583	96180.8	129035	106482	99452	45256.6	47858.1	36943.7	20560.9	100935	P67936	Tropomyosin alpha-4 chain (TM30p1) (Tropomyosin-4)
sp|P68133|ACTS_HUMAN	11782.4	32296.5	14665.9	29955.6	18781.5	16739.8	46125	12862	42464.1	36753.2	48516.8	41117.5	10412.7	30268	17107.4	P68133	Actin, alpha skeletal muscle (Alpha-actin-1)
sp|Q01082|SPTB2_HUMAN	24876	18588.1	31468.1	12206.5	11497	17216.4	35384.5	16376.6	12719.3	30702.1	21448	22058	13546.1	22944.8	15178.2	Q01082	Spectrin beta chain, non-erythrocytic 1 (Beta-II spectrin) (Fodrin beta chain) (Spectrin, non-erythroid beta chain 1)
sp|Q02985|FHR3_HUMAN	148495	119989	146024	113388	35031.2	107481	85273.6	108417	28065.1	158042	173689	177550	99670.8	14343.7	86935	Q02985	Complement factor H-related protein 3 (FHR-3) (DOWN16) (H factor-like protein 3)
sp|Q03591|FHR1_HUMAN	329424	268182	275464	219609	254944	194732	177403	246531	247488	309587	302415	353568	340278	280071	287756	Q03591	Complement factor H-related protein 1 (FHR-1) (H factor-like protein 1) (H-factor-like 1) (H36)
sp|Q04756|HGFA_HUMAN	226305	188762	225161	211688	181293	175593	200595	77692	176646	97011.8	201800	166101	117013	162244	183163	Q04756	Hepatocyte growth factor activator (HGF activator) (HGFA) (EC 3.4.21.-) [Cleaved into: Hepatocyte growth factor activator short chain; Hepatocyte growth factor activator long chain]
sp|Q06033|ITIH3_HUMAN	51227.3	69537	40036.1	36915.5	106880	93929.8	47378.3	47587.9	64875.6	42577.4	60021.1	80076.8	58296.3	63575.6	83051.5	Q06033	Inter-alpha-trypsin inhibitor heavy chain H3 (ITI heavy chain H3) (ITI-HC3) (Inter-alpha-inhibitor heavy chain 3) (Serum-derived hyaluronan-associated protein) (SHAP)
sp|Q07954|LRP1_HUMAN	14657.6	36009.6	48042.3	22684.6	21912.5	25041.4	63213.2	18896	55675.3	59757.2	63648.1	73405.2	16096.3	25106.2	69189	Q07954	Prolow-density lipoprotein receptor-related protein 1 (LRP-1) (Alpha-2-macroglobulin receptor) (A2MR) (Apolipoprotein E receptor) (APOER) (CD antigen CD91) [Cleaved into: Low-density lipoprotein receptor-related protein 1 85 kDa subunit (LRP-85); Low-density lipoprotein receptor-related protein 1 515 kDa subunit (LRP-515); Low-density lipoprotein receptor-related protein 1 intracellular domain (L…
sp|Q08380|LG3BP_HUMAN	68922.6	14606.7	10898.6	15076.2	15763.4	45776.8	18509.2	4897.81	16018.4	15995.6	47699.3	8735.98	12181.6	10320.8	20699.8	Q08380	Galectin-3-binding protein (Basement membrane autoantigen p105) (Lectin galactoside-binding soluble 3-binding protein) (Mac-2-binding protein) (MAC2BP) (Mac-2 BP) (Tumor-associated antigen 90K)
sp|Q08830|FGL1_HUMAN	1491.81	60540.6	7024.28	1111.99	1396.32	1861.86	263992	42010.7	48653.1	312747	2417.63	1499.47	61488.7	4480.68	5890.98	Q08830	Fibrinogen-like protein 1 (HP-041) (Hepassocin) (Hepatocyte-derived fibrinogen-related protein 1) (HFREP-1) (Liver fibrinogen-related protein 1) (LFIRE-1)
sp|Q10588|BST1_HUMAN	57499.4	60860.2	66213.5	4347.73	52005.6	52607.2	10556.6	49358.1	41409.8	48037.9	67272.1	45824.7	67885.2	6269.92	4053.72	Q10588	ADP-ribosyl cyclase/cyclic ADP-ribose hydrolase 2 (EC 3.2.2.6) (ADP-ribosyl cyclase 2) (Bone marrow stromal antigen 1) (BST-1) (Cyclic ADP-ribose hydrolase 2) (cADPr hydrolase 2) (CD antigen CD157)
sp|Q12805|FBLN3_HUMAN	191489	288634	172505	205775	141542	151074	163908	186379	223448	202846	174170	249525	158907	160248	155566	Q12805	EGF-containing fibulin-like extracellular matrix protein 1 (Extracellular protein S1-5) (Fibrillin-like protein) (Fibulin-3) (FIBL-3)
sp|Q13103|SPP24_HUMAN	45228.3	14037.9	16927.4	23510.3	23709.1	29564.1	33288.1	32694.7	36767.3	26713.2	26428.1	39351.2	24994.6	23489.9	28763	Q13103	Secreted phosphoprotein 24 (Spp-24) (Secreted phosphoprotein 2)
sp|Q13201|MMRN1_HUMAN	7845.46	2858.69	5298.33	6682.28	8304.27	2816.88	3174.07	5004.46	4156.47	1174.13	9816.64	1931.29	6877.25	9683.6	3873.03	Q13201	Multimerin-1 (EMILIN-4) (Elastin microfibril interface located protein 4) (Elastin microfibril interfacer 4) (Endothelial cell multimerin) [Cleaved into: Platelet glycoprotein Ia*; 155 kDa platelet multimerin (p-155) (p155)]
sp|Q13363|CTBP1_HUMAN	315438	526921	445340	521079	251609	243877	655775	189999	331805	162673	408938	164896	383238	639111	779627	Q13363	C-terminal-binding protein 1 (CtBP1) (EC 1.1.1.-)
sp|Q13418|ILK_HUMAN	3740.19	15757	5269.34	486.394	4606.73	1982.23	3936.12	9992.46	14054.4	7166.85	1278.67	3643.54	2237.28	1479.62	6231.55	Q13418	Integrin-linked protein kinase (EC 2.7.11.1) (59 kDa serine/threonine-protein kinase) (ILK-1) (ILK-2) (p59ILK)
sp|Q13790|APOF_HUMAN	155333	136259	157866	112360	124388	139621	136281	162651	149901	163734	159109	160338	125826	121573	118666	Q13790	Apolipoprotein F (Apo-F) (Lipid transfer inhibitor protein) (LTIP)
sp|Q14126|DSG2_HUMAN	24460.3	36757.7	26084.9	16159.4	4988.96	7703.48	30434.3	27873.2	6798.05	15625.7	12994.4	17336.3	15101.5	17898.1	8557.56	Q14126	Desmoglein-2 (Cadherin family member 5) (HDGC)
sp|Q14515|SPRL1_HUMAN	5825.08	5951.08	6570.59	527.645	8150.75	10066	8514.48	7824.89	3594.58	7650.66	9030.37	7969.8	11201.3	10289.5	8625.62	Q14515	SPARC-like protein 1 (High endothelial venule protein) (Hevin) (MAST 9)
sp|Q14574|DSC3_HUMAN	902.815	484.421	325.573	461.679	202.733	517.899	404.393	1247.67	822.117	756.496	1828.53	893.16	327.517	942.243	629.343	Q14574	Desmocollin-3 (Cadherin family member 3) (Desmocollin-4) (HT-CP)
sp|Q14624|ITIH4_HUMAN	2.8402e+06	1.46389e+06	2.86644e+06	2.65472e+06	3.19012e+06	2.52547e+06	2.39739e+06	2.59215e+06	2.97191e+06	3.1383e+06	2.80197e+06	3.16372e+06	1.88968e+06	2.00252e+06	2.67223e+06	Q14624	Inter-alpha-trypsin inhibitor heavy chain H4 (ITI heavy chain H4) (ITI-HC4) (Inter-alpha-inhibitor heavy chain 4) (Inter-alpha-trypsin inhibitor family heavy chain-related protein) (IHRP) (Plasma kallikrein sensitive glycoprotein 120) (Gp120) (PK-120) [Cleaved into: 70 kDa inter-alpha-trypsin inhibitor heavy chain H4; 35 kDa inter-alpha-trypsin inhibitor heavy chain H4]
sp|Q15063|POSTN_HUMAN	2038.25	1740.36	1721.21	432.453	3978.77	6052.31	2826.13	1147.59	3553.99	3716.55	2052.43	1539.04	7860.16	1399.18	1396.91	Q15063	Periostin (PN) (Osteoblast-specific factor 2) (OSF-2)
sp|Q15166|PON3_HUMAN	129648	161410	153351	138569	110311	74579.7	142961	56057.7	118723	111742	172554	87759.5	99183	105921	138505	Q15166	Serum paraoxonase/lactonase 3 (EC 3.1.1.2) (EC 3.1.1.81) (EC 3.1.8.1)
sp|Q15582|BGH3_HUMAN	130232	6403.59	17233.6	2408.49	6648.62	1759.7	2595.53	13670	5522.34	14662.5	2389.68	17636.9	18159.5	3015.84	2044.21	Q15582	Transforming growth factor-beta-induced protein ig-h3 (Beta ig-h3) (Kerato-epithelin) (RGD-containing collagen-associated protein) (RGD-CAP)
sp|Q15848|ADIPO_HUMAN	2361.01	9849.92	7077.79	7847.38	8711.83	8058.51	3707.28	8705.51	6470.34	8360.29	10212.9	6869.01	8774.02	12883.3	10302.9	Q15848	Adiponectin (30 kDa adipocyte complement-related protein) (Adipocyte complement-related 30 kDa protein) (ACRP30) (Adipocyte, C1q and collagen domain-containing protein) (Adipose most abundant gene transcript 1 protein) (apM-1) (Gelatin-binding protein)
sp|Q16394|EXT1_HUMAN	20140.3	21587.7	8008.79	109657	134249	94049.6	57719.3	85146.9	9140.74	109643	103840	6129.4	24018.9	10447.3	107618	Q16394	Exostosin-1 (EC 2.4.1.224) (EC 2.4.1.225) (Glucuronosyl-N-acetylglucosaminyl-proteoglycan/N-acetylglucosaminyl-proteoglycan 4-alpha-N-acetylglucosaminyltransferase) (Multiple exostoses protein 1) (Putative tumor suppressor protein EXT1)
sp|Q16610|ECM1_HUMAN	432174	348383	375436	443915	376097	407165	355540	366948	468423	380184	369439	390099	312016	280402	327832	Q16610	Extracellular matrix protein 1 (Secretory component p85)
sp|Q5T1H1|EYS_HUMAN	87444.5	40110.9	66705.8	72917.4	92550.8	60671.5	40026	80550.8	51496.5	59858	73479.5	54201.5	40933.1	53260	56542.1	Q5T1H1	Protein eyes shut homolog (Epidermal growth factor-like protein 10) (EGF-like protein 10) (Epidermal growth factor-like protein 11) (EGF-like protein 11) (Protein spacemaker homolog)
sp|Q5VY43|PEAR1_HUMAN	95706.6	7394.52	13561.7	61198.1	73633.1	12189.9	15194.7	18984.5	12243.2	17104.8	16624.6	20365.6	18276.4	57159.1	11420.7	Q5VY43	Platelet endothelial aggregation receptor 1 (hPEAR1) (Multiple epidermal growth factor-like domains protein 12) (Multiple EGF-like domains protein 12)
sp|Q6EMK4|VASN_HUMAN	34927.4	77204.3	50884.4	89073.6	67906.9	64691.8	75577	35069.3	42305	91889.7	83886	32603.5	28208.9	75800.7	26992.8	Q6EMK4	Vasorin (Protein slit-like 2)
sp|Q6S8J3|POTEE_HUMAN	247726	39969.4	248187	265213	221808	218552	296326	43008.3	295603	299348	295659	315486	245386	214573	192778	Q6S8J3	POTE ankyrin domain family member E (ANKRD26-like family C member 1A) (Prostate, ovary, testis-expressed protein on chromosome 2) (POTE-2)
sp|Q6UXB8|PI16_HUMAN	25007.4	154034	261812	160111	243196	25919	29363.2	111450	147110	67153.3	166931	185136	143879	164614	158584	Q6UXB8	Peptidase inhibitor 16 (PI-16) (Cysteine-rich secretory protein 9) (CRISP-9) (PSP94-binding protein)
sp|Q6UXS9|CASPC_HUMAN	2.95001e+06	3.27174e+06	3.31392e+06	3.25154e+06	2.97569e+06	3.49494e+06	2.41964e+06	2.52401e+06	2.79424e+06	2.51018e+06	3.2616e+06	3.25527e+06	3.8248e+06	3.74463e+06	2.75616e+06	Q6UXS9	Inactive caspase-12 (CASP-12)
sp|Q6UY14|ATL4_HUMAN	17545.1	21704.8	22356.5	22516.8	79535	21351.4	24245.3	22761.8	17435.9	24284.2	87620.4	29650.1	26046.3	25585.1	33855.4	Q6UY14	ADAMTS-like protein 4 (ADAMTSL-4) (Thrombospondin repeat-containing protein 1)
sp|Q7Z7G0|TARSH_HUMAN	1254.88	938.779	652.267	612.168	1210.72	1491.99	1544.49	2717.73	1382.85	2417.45	368.971	2585.02	1553.79	1064.06	1106.34	Q7Z7G0	Target of Nesh-SH3 (Tarsh) (ABI gene family member 3-binding protein) (Nesh-binding protein) (NeshBP)
sp|Q7Z7M0|MEGF8_HUMAN	312336	346379	396133	39960.7	287828	272601	189595	188291	170043	22449	249915	190623	236518	31915.2	307880	Q7Z7M0	Multiple epidermal growth factor-like domains protein 8 (Multiple EGF-like domains protein 8) (Epidermal growth factor-like protein 4) (EGF-like protein 4)
sp|Q86SQ4|GP126_HUMAN	11702.4	2234.11	46515.5	51098.7	40463.4	1830.99	1464.81	21948.6	6467.9	32585.1	2486.27	33175	41044.9	39952.4	5600.32	Q86SQ4	G-protein coupled receptor 126 (Developmentally regulated G-protein-coupled receptor) (Vascular inducible G protein-coupled receptor)
sp|Q86UD1|OAF_HUMAN	8073.86	10656	2125.83	6800.38	5977.56	556.956	4141.41	12236.8	7746.66	7080.72	879.936	9209.61	1839.63	7594.87	1131.33	Q86UD1	Out at first protein homolog (HCV NS5A-transactivated protein 13 target protein 2)
sp|Q86YS7|C2CD5_HUMAN	3266.59	3602.7	6282.07	5860.26	6576.39	2422.06	11507.8	26221.4	8590.31	33107.1	2568.21	3183.9	28609.4	3140.46	37985.5	Q86YS7	C2 domain-containing protein 5 (C2 domain-containing phosphoprotein of 138 kDa)
sp|Q8IXL6|DMP4_HUMAN	30578.1	4749.58	75555.4	7144.74	7506.97	6473.64	21209.7	15354.9	16238.9	49122.8	4301.83	30456.8	51927.7	42479.7	42033.7	Q8IXL6	Extracellular serine/threonine protein kinase FAM20C (EC 2.7.11.1) (Dentin matrix protein 4) (DMP-4) (Golgi casein kinase) (Golgi-enriched fraction casein kinase) (GEF-CK)
sp|Q8IZF2|GP116_HUMAN	1996.66	4246.38	3281.5	14767.1	3230.81	5119.59	9792.01	2787.27	4678.21	1790.49	1953.97	1140.66	2474.63	390.006	3912.08	Q8IZF2	Adhesion G protein-coupled receptor F5 (G-protein coupled receptor 116)
sp|Q8IZQ5|SELH_HUMAN	224.283	124.836	337.34	212.547	161.044	0	238.139	204.731	247.016	216.538	168.663	422.595	286.833	83.8167	0	Q8IZQ5	Selenoprotein H (SelH)
sp|Q8NBJ4|GOLM1_HUMAN	31600	43036.4	69363.7	3411.73	30592.7	5021.73	42507.2	18264	5907.64	2047.52	48253.8	79252.2	2159.14	27861.2	27888.1	Q8NBJ4	Golgi membrane protein 1 (Golgi membrane protein GP73) (Golgi phosphoprotein 2)
sp|Q8WWZ8|OIT3_HUMAN	11387.6	7854.01	173041	173009	9252.61	182190	4627.54	169735	3322.34	5222.2	6958.51	6189.58	162371	126474	3295.55	Q8WWZ8	Oncoprotein-induced transcript 3 protein (Liver-specific zona pellucida domain-containing protein)
sp|Q8WZ75|ROBO4_HUMAN	3573.49	24050.2	8158.19	1149.78	8074.02	4846.78	5126.56	2195.59	4229.24	4465.61	1909.41	22893.3	6783.35	4195.56	24767.6	Q8WZ75	Roundabout homolog 4 (Magic roundabout)
sp|Q92954|PRG4_HUMAN	165135	187971	162141	186411	172824	149162	56807.3	450431	88726.8	58730.9	112456	192537	260622	198698	90763.3	Q92954	Proteoglycan 4 (Lubricin) (Megakaryocyte-stimulating factor) (Superficial zone proteoglycan) [Cleaved into: Proteoglycan 4 C-terminal part]
sp|Q96EE4|CC126_HUMAN	12282.7	18404.2	24472	32672	32290.7	33266.6	14366.4	19379.3	5659.83	34023.2	2387.7	31055.8	22213.7	22501.8	25222.2	Q96EE4	Coiled-coil domain-containing protein 126
sp|Q96IY4|CBPB2_HUMAN	792428	819989	768289	838711	821638	711793	740829	728897	760090	795682	910714	770427	755961	826524	779690	Q96IY4	Carboxypeptidase B2 (EC 3.4.17.20) (Carboxypeptidase U) (CPU) (Plasma carboxypeptidase B) (pCPB) (Thrombin-activable fibrinolysis inhibitor) (TAFI)
sp|Q96KM6|Z512B_HUMAN	15532.3	38889	10235.5	3436.12	43439.9	4620.83	3949.52	33110.2	14500.6	40368.3	10626.4	54025.5	29058.8	16452.9	24844.3	Q96KM6	Zinc finger protein 512B
sp|Q96KN2|CNDP1_HUMAN	31107.4	3146.85	22788.7	3915.49	6092.55	1558.28	17875.2	5740.31	3662.23	1958.91	3734.68	5736.91	20602.2	16994.4	4079.6	Q96KN2	Beta-Ala-His dipeptidase (EC 3.4.13.20) (CNDP dipeptidase 1) (Carnosine dipeptidase 1) (Glutamate carboxypeptidase-like protein 2) (Serum carnosinase)
sp|Q96LB3|IFT74_HUMAN	1.99438e+06	2.6368e+06	2.34276e+06	2.62157e+06	2.13099e+06	2.28079e+06	3.75739e+06	2.15086e+06	1.83671e+06	2.84556e+06	2.58301e+06	1029.11	2.77681e+06	3.24198e+06	3.39775e+06	Q96LB3	Intraflagellar transport protein 74 homolog (Capillary morphogenesis gene 1 protein) (CMG-1) (Coiled-coil domain-containing protein 2)
sp|Q96PD5|PGRP2_HUMAN	2.4215e+06	2.30026e+06	2.35109e+06	2.7205e+06	2.3465e+06	2.49422e+06	2.15801e+06	2.59523e+06	2.48489e+06	2.62644e+06	2.55866e+06	2.22695e+06	2.17116e+06	2.41777e+06	2.34498e+06	Q96PD5	N-acetylmuramoyl-L-alanine amidase (EC 3.5.1.28) (Peptidoglycan recognition protein 2) (Peptidoglycan recognition protein long) (PGRP-L)
sp|Q96S96|PEBP4_HUMAN	3625.61	96725.7	94125.7	123029	3102.08	99444	61353.2	4889.34	2620.41	81952	80499	1822.77	1445.34	78085.2	108164	Q96S96	Phosphatidylethanolamine-binding protein 4 (PEBP-4) (hPEBP4) (Protein cousin-of-RKIP 1)
sp|Q99453|PHX2B_HUMAN	15069.9	11720.3	9377.17	11734	9307.44	7057.13	6089.83	14812.9	8925.03	20348.5	971.018	7410.91	7981.11	6523.61	6961.65	Q99453	Paired mesoderm homeobox protein 2B (Neuroblastoma Phox) (NBPhox) (PHOX2B homeodomain protein) (Paired-like homeobox 2B)
sp|Q99784|NOE1_HUMAN	7212.85	3786.4	22865.8	37789.3	25359.9	55492.8	4318.89	11018.2	46192.1	6242.81	9178.2	9941.07	22651.2	5511.84	8518.23	Q99784	Noelin (Neuronal olfactomedin-related ER localized protein) (Olfactomedin-1)
sp|Q99941|ATF6B_HUMAN	2757.45	73732.8	15760.6	11138.1	11446.8	11318.6	51095	8922.45	40495.6	1921.12	7421.21	1764.24	20023.3	6649.63	19183	Q99941	Cyclic AMP-dependent transcription factor ATF-6 beta (cAMP-dependent transcription factor ATF-6 beta) (Activating transcription factor 6 beta) (ATF6-beta) (Protein G13) (cAMP response element-binding protein-related protein) (Creb-rp) (cAMP-responsive element-binding protein-like 1) [Cleaved into: Processed cyclic AMP-dependent transcription factor ATF-6 beta]
sp|Q9BVM4|GGACT_HUMAN	150285	2548.51	9617.05	211962	57236	42459.5	343205	1441.06	149947	16086.4	1292.22	175676	201226	296294	321927	Q9BVM4	Gamma-glutamylaminecyclotransferase (GGACT) (EC 2.3.2.4) (AIG2-like domain-containing protein 1) (Gamma-glutamylamine cyclotransferase)
sp|Q9C0F0|ASXL3_HUMAN	5089.13	19549.6	19231.6	16771.4	4414.38	9199.88	13071.3	21670.7	9909.31	22668.5	8894.34	14102.1	20347	1441.77	13384.1	Q9C0F0	Putative Polycomb group protein ASXL3 (Additional sex combs-like protein 3)
sp|Q9H4A9|DPEP2_HUMAN	883.753	1002.53	1933.87	1006.86	667.442	741.942	559.415	266.847	944.153	601.234	277.158	425.174	233.383	634.649	911.151	Q9H4A9	Dipeptidase 2 (EC 3.4.13.19)
sp|Q9H4B8|DPEP3_HUMAN	883.753	1002.53	1933.98	1006.86	667.442	741.942	559.415	269.015	944.153	601.234	278.825	429.441	233.383	634.649	911.151	Q9H4B8	Dipeptidase 3 (EC 3.4.13.19)
sp|Q9H8L6|MMRN2_HUMAN	4484.98	12000.2	7876.21	3299.6	2094.69	9465.28	2210.56	3583.53	9191.87	2898.85	3354.77	8618.41	10828.2	1017.47	14713.2	Q9H8L6	Multimerin-2 (EMILIN-3) (Elastin microfibril interface located protein 3) (Elastin microfibril interfacer 3) (EndoGlyx-1 p125/p140 subunit)
sp|Q9NPH3|IL1AP_HUMAN	36983.7	18642.3	19029.1	31271.8	18448.9	114380	45334.8	11613.8	7771.9	13468.1	22681.6	40333	9170.17	8152.35	27168.5	Q9NPH3	Interleukin-1 receptor accessory protein (IL-1 receptor accessory protein) (IL-1RAcP) (Interleukin-1 receptor 3) (IL-1R-3) (IL-1R3)
sp|Q9NQ38|ISK5_HUMAN	11205.5	3579.28	6719.15	4883.81	12788	2879.56	23073.4	9926.61	4768.03	3193.55	8077.39	3289.12	3294.89	2448.96	11545.6	Q9NQ38	Serine protease inhibitor Kazal-type 5 (Lympho-epithelial Kazal-type-related inhibitor) (LEKTI) [Cleaved into: Hemofiltrate peptide HF6478; Hemofiltrate peptide HF7665]
sp|Q9NQ79|CRAC1_HUMAN	97463.5	75193	21632	85972.4	11272.8	113524	96251.3	155960	15358.8	78752.6	88031	93803.6	136128	58974.5	15233.8	Q9NQ79	Cartilage acidic protein 1 (68 kDa chondrocyte-expressed protein) (CEP-68) (ASPIC)
sp|Q9NZP8|C1RL_HUMAN	224421	199958	209490	217800	221094	259518	229783	249755	189887	244481	223239	221223	200804	215167	231326	Q9NZP8	Complement C1r subcomponent-like protein (C1r-LP) (C1r-like protein) (EC 3.4.21.-) (C1r-like serine protease analog protein) (CLSPa)
sp|Q9UBP4|DKK3_HUMAN	18538.6	13964.6	20607.2	4947.31	12854	2483.94	23647	6177.2	5929.51	10718.8	12022.4	12399.4	14725.5	18690.8	8498.08	Q9UBP4	Dickkopf-related protein 3 (Dickkopf-3) (Dkk-3) (hDkk-3)
sp|Q9UGM5|FETUB_HUMAN	238259	262709	233702	229090	287705	324402	235796	319971	295607	213501	244042	148797	390053	294565	245761	Q9UGM5	Fetuin-B (16G2) (Fetuin-like protein IRL685) (Gugu)
sp|Q9UJJ9|GNPTG_HUMAN	24223.8	16180.8	6001.34	13923.4	17073.5	4811.3	6773.2	8155.95	2820.46	4547.19	2294.53	16627.7	7890.4	2723.38	15769	Q9UJJ9	N-acetylglucosamine-1-phosphotransferase subunit gamma (GlcNAc-1-phosphotransferase subunit gamma) (UDP-N-acetylglucosamine-1-phosphotransferase subunit gamma)
sp|Q9UK55|ZPI_HUMAN	15549.5	3217.73	5843.6	16297.6	2706.53	65106	2013.38	14274.1	5612.77	58640.6	3349.31	56640.8	2992.14	58240.7	2533.94	Q9UK55	Protein Z-dependent protease inhibitor (PZ-dependent protease inhibitor) (PZI) (Serpin A10)
sp|Q9ULI3|HEG1_HUMAN	21362	13634.5	13112.3	24004.3	1899.29	9242.22	1118.62	8371.46	2116.24	5235.06	3722.72	2003.8	1693.37	7517.69	11186.1	Q9ULI3	Protein HEG homolog 1
sp|Q9UNW1|MINP1_HUMAN	12737.5	7718.58	5371.16	8983.78	16369.1	10759.1	4560.55	2412.1	126480	23274.7	3019.44	5447.41	14817.5	7076.79	10533	Q9UNW1	Multiple inositol polyphosphate phosphatase 1 (EC 3.1.3.62) (2,3-bisphosphoglycerate 3-phosphatase) (2,3-BPG phosphatase) (EC 3.1.3.80) (Inositol (1,3,4,5)-tetrakisphosphate 3-phosphatase) (Ins(1,3,4,5)P(4) 3-phosphatase)
sp|Q9UPN9|TRI33_HUMAN	83706.4	84217.4	76900.2	55700.1	76335.5	51849.6	58710.6	84579.5	94016.2	51126.7	62471	75214.4	73089	60333	75746.5	Q9UPN9	E3 ubiquitin-protein ligase TRIM33 (EC 6.3.2.-) (Ectodermin homolog) (RET-fused gene 7 protein) (Protein Rfg7) (Transcription intermediary factor 1-gamma) (TIF1-gamma) (Tripartite motif-containing protein 33)
sp|Q9Y490|TLN1_HUMAN	62367.1	148517	71771.7	82699.1	121463	93981.9	104320	128636	104631	73301.8	65731.2	90783.5	79284.6	95861.7	135677	Q9Y490	Talin-1
sp|Q9Y4D7|PLXD1_HUMAN	115377	119524	2623.53	7019.52	12027.3	5833.82	6964.73	131662	6940.28	10307.4	5216.97	10405.4	10843.3	78779.6	10308.4	Q9Y4D7	Plexin-D1
sp|Q9Y574|ASB4_HUMAN	6140.53	5247.89	4780.99	6551.62	8295.58	3625.93	4020.74	9086.16	882.138	1115.36	4889.01	5056.18	3231.22	857.336	3302.47	Q9Y574	Ankyrin repeat and SOCS box protein 4 (ASB-4)
sp|Q9Y5Y7|LYVE1_HUMAN	49374.2	273498	239975	96093.3	225719	127879	67865.3	125206	345148	68584.6	72108.8	240484	160059	177029	52945.3	Q9Y5Y7	Lymphatic vessel endothelial hyaluronic acid receptor 1 (LYVE-1) (Cell surface retention sequence-binding protein 1) (CRSBP-1) (Extracellular link domain-containing protein 1) (Hyaluronic acid receptor)
sp|Q9Y646|CBPQ_HUMAN	15841.7	4084.33	4194.76	7051.95	7253.05	3756.4	3859.28	4023.9	5633.32	3196.72	8107.69	19058.4	5147.28	5304.23	6552.83	Q9Y646	Carboxypeptidase Q (EC 3.4.17.-) (Lysosomal dipeptidase) (Plasma glutamate carboxypeptidase)
sp|Q9Y6R7|FCGBP_HUMAN	481520	581782	497590	663493	549457	607369	455177	579808	815840	521812	431478	161264	480419	143505	168341	Q9Y6R7	IgGFc-binding protein (Fcgamma-binding protein antigen) (FcgammaBP)

## Sheet: MARS14
Protein	Control-1	Control-2	Control-3	stage I-1	stage I-2	stage I-3	stage II-1	stage II-2	stage II-3	stage III-1	stage III-2	stage III-3	stage IV-1	stage IV-2	stage IV-3	Uniprot ID	Protein.names
sp|A5A3E0|POTEF_HUMAN	10551.4	42206.4	48495.3	162457	139175	112254	57778.6	6327.19	58577.9	181453	111558	139634	19573	16114.6	8859.41	A5A3E0	POTE ankyrin domain family member F (ANKRD26-like family C member 1B) (Chimeric POTE-actin protein)
sp|P00915|CAH1_HUMAN	20977.7	48126	39258.9	483754	163896	136669	117481	52300.8	34101.7	593773	547134	571566	69382.4	63888.2	74944.8	P00915	Carbonic anhydrase 1 (EC 4.2.1.1) (Carbonate dehydratase I) (Carbonic anhydrase B) (CAB) (Carbonic anhydrase I) (CA-I)
sp|P01011|AACT_HUMAN	640566	511004	609396	1.49291e+06	1.322e+06	1.35966e+06	608574	497497	586655	1.21457e+06	1.00465e+06	1.16593e+06	443606	344141	322556	P01011	Alpha-1-antichymotrypsin (ACT) (Cell growth-inhibiting gene 24/25 protein) (Serpin A3) [Cleaved into: Alpha-1-antichymotrypsin His-Pro-less]
sp|P01023|A2MG_HUMAN	2.58671e+06	2.03623e+06	2.43631e+06	5.82586e+06	5.79608e+06	5.80298e+06	2.41033e+06	2.58752e+06	2.21509e+06	4.68802e+06	5.03914e+06	4.82381e+06	1.30577e+06	1.71007e+06	1.58115e+06	P01023	Alpha-2-macroglobulin (Alpha-2-M) (C3 and PZP-like alpha-2-macroglobulin domain-containing protein 5)
sp|P02452|CO1A1_HUMAN	586400	494850	390825	1.72845e+07	1.4018e+07	1.51457e+07	721929	826807	357831	134018	218620	394228	609561	504263	456446	P02452	Collagen alpha-1(I) chain (Alpha-1 type I collagen)
sp|P02654|APOC1_HUMAN	805500	660673	732112	885817	1.15844e+06	1.04975e+06	850604	643841	700441	1.67673e+06	1.55636e+06	1.69309e+06	621407	526668	596535	P02654	Apolipoprotein C-I (Apo-CI) (ApoC-I) (Apolipoprotein C1) [Cleaved into: Truncated apolipoprotein C-I]
sp|P02671|FIBA_HUMAN	7.01392e+06	7.12902e+06	7.30473e+06	9.55953e+06	9.37632e+06	8.61728e+06	7.3351e+06	7.42024e+06	7.47621e+06	1.06027e+07	1.06573e+07	1.16539e+07	7.21564e+06	6.60823e+06	7.55011e+06	P02671	Fibrinogen alpha chain [Cleaved into: Fibrinopeptide A; Fibrinogen alpha chain]
sp|P02679|FIBG_HUMAN	2.07728e+06	2.18115e+06	2.12756e+06	6.70308e+06	9.41777e+06	8.69862e+06	2.38286e+06	2.17941e+06	1.49285e+06	8.49791e+06	7.47058e+06	6.47047e+06	1.17031e+06	1.17456e+06	1.08898e+06	P02679	Fibrinogen gamma chain
sp|P02745|C1QA_HUMAN	1.80777e+06	1.58929e+06	1.60081e+06	5.97741e+06	5.4224e+06	6.05204e+06	1.34946e+06	2.012e+06	1.72944e+06	4.36911e+06	5.33981e+06	5.05041e+06	695784	698904	662572	P02745	Complement C1q subcomponent subunit A
sp|P02751|FINC_HUMAN	1.28392e+07	1.23132e+07	1.22842e+07	2.07385e+07	2.24063e+07	2.25114e+07	8.25992e+06	7.71928e+06	8.57477e+06	1.00916e+07	1.05219e+07	1.04463e+07	7.91264e+06	8.11251e+06	7.94487e+06	P02751	Fibronectin (FN) (Cold-insoluble globulin) (CIG) [Cleaved into: Anastellin; Ugl-Y1; Ugl-Y2; Ugl-Y3]
sp|P02766|TTHY_HUMAN	169621	177431	163622	476205	560614	620965	120462	156335	183089	384816	463792	375247	115905	171765	132449	P02766	Transthyretin (ATTR) (Prealbumin) (TBPA)
sp|P04180|LCAT_HUMAN	156391	128317	160823	293898	221610	244722	135745	153345	178558	273701	267953	252710	258449	84725.8	127898	P04180	Phosphatidylcholine-sterol acyltransferase (EC 2.3.1.43) (Lecithin-cholesterol acyltransferase) (Phospholipid-cholesterol acyltransferase)
sp|P06276|CHLE_HUMAN	43843.1	45167.9	44973.4	97043.9	101457	83370.3	28727.7	30771.8	34167.1	33059.7	68969.9	45108.2	57125.1	103745	65526.6	P06276	Cholinesterase (EC 3.1.1.8) (Acylcholine acylhydrolase) (Butyrylcholine esterase) (Choline esterase II) (Pseudocholinesterase)
sp|P08123|CO1A2_HUMAN	257986	175047	171673	5.68003e+06	4.32211e+06	4.87218e+06	176574	87108.6	201414	145256	100862	128708	169274	147701	291907	P08123	Collagen alpha-2(I) chain (Alpha-2 type I collagen)
sp|P08185|CBG_HUMAN	30631.6	26078.2	20387	65155.5	54609.6	40511.8	10563.1	13458.2	20784.9	63560.5	52801.2	64069.2	37420.2	26703.4	15469.4	P08185	Corticosteroid-binding globulin (CBG) (Serpin A6) (Transcortin)
sp|P08519|APOA_HUMAN	2.39706e+06	2.24765e+06	2.36037e+06	5.07811e+06	4.44745e+06	5.21542e+06	1.95983e+06	1.66955e+06	1.74988e+06	3.73631e+06	5.18175e+06	4.55389e+06	1.36728e+06	1.11167e+06	1.2849e+06	P08519	Apolipoprotein(a) (Apo(a)) (Lp(a)) (EC 3.4.21.-)
sp|P10124|SRGN_HUMAN	40646.6	11559.5	52943.2	148523	131092	116451	52677.6	57772.9	44352.6	99421.1	73559.4	69537.4	50881.8	55446.6	81260.3	P10124	Serglycin (Hematopoietic proteoglycan core protein) (Platelet proteoglycan core protein) (P.PG) (Secretory granule proteoglycan core protein)
sp|P12955|PEPD_HUMAN	93888.8	24961.7	106299	257786	240522	200908	60037.2	88951.8	34008.7	246277	179325	226895	55817.3	40270.9	24150.2	P12955	Xaa-Pro dipeptidase (X-Pro dipeptidase) (EC 3.4.13.9) (Imidodipeptidase) (Peptidase D) (Proline dipeptidase) (Prolidase)
sp|P13598|ICAM2_HUMAN	20893	47504	94286.4	193709	174481	150126	70293.1	41009.4	64000.8	145105	148796	146984	60556.7	33592	42783.5	P13598	Intercellular adhesion molecule 2 (ICAM-2) (CD antigen CD102)
sp|P18206|VINC_HUMAN	753.72	1176.08	1310.53	2945.39	8175.43	7617.4	1684.57	403.276	347.771	911.696	11192.7	5061.14	911.819	590.36	925.171	P18206	Vinculin (Metavinculin) (MV)
sp|P22352|GPX3_HUMAN	32023.2	53652.5	75521.6	75196.2	154550	93887.8	209522	209196	43997.1	492708	401939	502407	180512	44793.3	159211	P22352	Glutathione peroxidase 3 (GPx-3) (GSHPx-3) (EC 1.11.1.9) (Extracellular glutathione peroxidase) (Plasma glutathione peroxidase) (GPx-P) (GSHPx-P)
sp|P55056|APOC4_HUMAN	321983	47350	343231	583908	498007	573824	215757	233618	290961	508809	497530	505630	210372	91569	111316	P55056	Apolipoprotein C-IV (Apo-CIV) (ApoC-IV) (Apolipoprotein C4)
sp|Q96KN2|CNDP1_HUMAN	207264	217509	224218	1.11926e+06	1.07272e+06	1.06348e+06	121738	219561	191374	1.01518e+06	838219	1.06726e+06	142072	124964	117363	Q96KN2	Beta-Ala-His dipeptidase (EC 3.4.13.20) (CNDP dipeptidase 1) (Carnosine dipeptidase 1) (Glutamate carboxypeptidase-like protein 2) (Serum carnosinase)
sp|Q99784|NOE1_HUMAN	13115.4	36952.6	6862.09	79534.2	180483	197913	217940	14440	19437.4	182779	161961	194422	5489.43	19749.3	9188.41	Q99784	Noelin (Neuronal olfactomedin-related ER localized protein) (Olfactomedin-1)
sp|Q9BXR6|FHR5_HUMAN	615777	559221	393129	688844	641715	703893	578166	538525	575174	1.13396e+06	1.23741e+06	931373	667067	496447	345436	Q9BXR6	Complement factor H-related protein 5 (FHR-5)
sp|Q9NZP8|C1RL_HUMAN	1.37958e+06	1.15899e+06	1.27646e+06	1.92604e+06	2.60314e+06	2.33882e+06	1.15331e+06	1.23826e+06	1.49789e+06	2.60674e+06	2.16458e+06	2.36985e+06	986137	929021	950632	Q9NZP8	Complement C1r subcomponent-like protein (C1r-LP) (C1r-like protein) (EC 3.4.21.-) (C1r-like serine protease analog protein) (CLSPa)
sp|Q9Y5G5|PCDG8_HUMAN	19159.9	180060	178083	331662	275791	256956	204476	184500	160546	966631	806046	1.02763e+06	163144	259903	216771	Q9Y5G5	Protocadherin gamma-A8 (PCDH-gamma-A8)
sp|O00187|MASP2_HUMAN	478452	593500	641644	259207	192434	162750	362880	228825	639937	363669	234294	263790	400244	281291	421102	O00187	Mannan-binding lectin serine protease 2 (EC 3.4.21.104) (MBL-associated serine protease 2) (Mannose-binding protein-associated serine protease 2) (MASP-2) [Cleaved into: Mannan-binding lectin serine protease 2 A chain; Mannan-binding lectin serine protease 2 B chain]
sp|O14960|LECT2_HUMAN	80079.2	99549.7	97360	90973.1	77581.1	64500.4	120900	116535	85517.2	68267.1	53421.1	64354.8	102140	120176	115683	O14960	Leukocyte cell-derived chemotaxin-2 (LECT-2) (hLECT2)
sp|O15204|ADEC1_HUMAN	29515.4	32223.3	30060.3	19578.6	18272.7	22063.3	29946.3	31760.6	24150	18868.4	19496.8	21221.3	22518	35454.6	24297.2	O15204	ADAM DEC1 (EC 3.4.24.-) (A disintegrin and metalloproteinase domain-like protein decysin-1) (ADAM-like protein decysin-1)
sp|O43866|CD5L_HUMAN	1.87941e+06	2.04195e+06	2.0014e+06	1.16473e+06	1.00936e+06	1.12516e+06	1.69784e+06	1.79899e+06	1.71526e+06	1.06199e+06	1.15523e+06	1.05737e+06	2.38731e+06	2.8523e+06	2.93165e+06	O43866	CD5 antigen-like (Apoptosis inhibitor expressed by macrophages) (hAIM) (CT-2) (IgM-associated peptide) (SP-alpha)
sp|P00738|HPT_HUMAN	1.04892e+08	9.75951e+07	9.92957e+07	3.82196e+07	3.32975e+07	3.68634e+07	1.49744e+08	1.45983e+08	1.356e+08	5.17723e+07	6.26519e+07	5.76907e+07	3.38533e+08	3.81773e+08	3.25405e+08	P00738	Haptoglobin (Zonulin) [Cleaved into: Haptoglobin alpha chain; Haptoglobin beta chain]
sp|P01009|A1AT_HUMAN	1.62242e+06	869913	1.17198e+06	351214	362752	419045	1.85277e+06	2.13739e+06	2.10575e+06	499697	554308	355795	2.9324e+06	1.93985e+06	2.92234e+06	P01009	Alpha-1-antitrypsin (Alpha-1 protease inhibitor) (Alpha-1-antiproteinase) (Serpin A1) [Cleaved into: Short peptide from AAT (SPAAT)]
sp|P01034|CYTC_HUMAN	1.22865e+06	1.16797e+06	1.18452e+06	804747	774685	791246	1.20752e+06	1.21071e+06	966003	786803	917977	870665	854857	995031	835225	P01034	Cystatin-C (Cystatin-3) (Gamma-trace) (Neuroendocrine basic polypeptide) (Post-gamma-globulin)
sp|P01344|IGF2_HUMAN	1.79831e+06	1.86392e+06	1.79056e+06	1.17305e+06	1.13116e+06	1.30035e+06	1.78427e+06	1.85765e+06	1.64177e+06	1.0974e+06	1.22061e+06	1.13213e+06	2.24147e+06	2.51767e+06	2.22444e+06	P01344	Insulin-like growth factor II (IGF-II) (Somatomedin-A) (T3M-11-derived growth factor) [Cleaved into: Insulin-like growth factor II; Insulin-like growth factor II Ala-25 Del; Preptin]
sp|P01860|IGHG3_HUMAN	352560	202125	212487	74513.5	198344	150173	387914	418897	326758	210626	151405	260633	388702	413973	392226	P01860	Ig gamma-3 chain C region (HDC) (Heavy chain disease protein)
sp|P02749|APOH_HUMAN	1.03301e+08	1.09209e+08	1.08607e+08	1.06998e+08	1.05861e+08	1.00756e+08	1.03026e+08	1.13133e+08	1.20435e+08	8.21509e+07	7.67518e+07	7.28029e+07	1.33547e+08	1.2635e+08	1.39311e+08	P02749	Beta-2-glycoprotein 1 (APC inhibitor) (Activated protein C-binding protein) (Anticardiolipin cofactor) (Apolipoprotein H) (Apo-H) (Beta-2-glycoprotein I) (B2GPI) (Beta(2)GPI)
sp|P02760|AMBP_HUMAN	1.0477e+08	1.20759e+08	1.00532e+08	8.78323e+07	6.61592e+07	6.80329e+07	1.06007e+08	9.85862e+07	1.03326e+08	8.40554e+07	7.99434e+07	7.3327e+07	1.36671e+08	1.51928e+08	1.47079e+08	P02760	Protein AMBP [Cleaved into: Alpha-1-microglobulin (Protein HC) (Alpha-1 microglycoprotein) (Complex-forming glycoprotein heterogeneous in charge); Inter-alpha-trypsin inhibitor light chain (ITI-LC) (Bikunin) (EDC1) (HI-30) (Uronic-acid-rich protein); Trypstatin]
sp|P02765|FETUA_HUMAN	4.57644e+07	4.69127e+07	4.74038e+07	3.2278e+07	2.84881e+07	3.22413e+07	4.85591e+07	4.95404e+07	4.49242e+07	2.73623e+07	2.86265e+07	3.13975e+07	4.13725e+07	3.91565e+07	4.14155e+07	P02765	Alpha-2-HS-glycoprotein (Alpha-2-Z-globulin) (Ba-alpha-2-glycoprotein) (Fetuin-A) [Cleaved into: Alpha-2-HS-glycoprotein chain A; Alpha-2-HS-glycoprotein chain B]
sp|P02775|CXCL7_HUMAN	6.57547e+06	7.25896e+06	7.50434e+06	5.09329e+06	4.88294e+06	4.56891e+06	8.15567e+06	8.35043e+06	7.79932e+06	4.50925e+06	3.77669e+06	4.43455e+06	1.75755e+07	1.81874e+07	1.785e+07	P02775	Platelet basic protein (PBP) (C-X-C motif chemokine 7) (Leukocyte-derived growth factor) (LDGF) (Macrophage-derived growth factor) (MDGF) (Small-inducible cytokine B7) [Cleaved into: Connective tissue-activating peptide III (CTAP-III) (LA-PF4) (Low-affinity platelet factor IV); TC-2; Connective tissue-activating peptide III(1-81) (CTAP-III(1-81)); Beta-thromboglobulin (Beta-TG); Neutrophil-activa…
sp|P02776|PLF4_HUMAN	2.38194e+06	2.72203e+06	2.80909e+06	1.52595e+06	1.87865e+06	1.57346e+06	2.72124e+06	2.60373e+06	2.82999e+06	1.94632e+06	1.37307e+06	1.86107e+06	6.30261e+06	5.49779e+06	6.85114e+06	P02776	Platelet factor 4 (PF-4) (C-X-C motif chemokine 4) (Iroplact) (Oncostatin-A) [Cleaved into: Platelet factor 4, short form]
sp|P05019|IGF1_HUMAN	373500	324962	335389	181248	188103	218817	254206	259585	327769	219379	241458	208992	480144	391464	501707	P05019	Insulin-like growth factor I (IGF-I) (Mechano growth factor) (MGF) (Somatomedin-C)
sp|P07477|TRY1_HUMAN	2.0098e+07	2.5328e+07	2.2364e+07	1.22948e+07	1.26718e+07	1.08152e+07	2.23307e+07	2.71195e+07	2.56365e+07	1.53061e+07	1.15124e+07	1.3677e+07	3.57756e+07	3.3731e+07	3.57519e+07	P07477	Trypsin-1 (EC 3.4.21.4) (Beta-trypsin) (Cationic trypsinogen) (Serine protease 1) (Trypsin I) [Cleaved into: Alpha-trypsin chain 1; Alpha-trypsin chain 2]
sp|P07478|TRY2_HUMAN	1.98813e+07	2.38716e+07	2.06023e+07	1.10501e+07	1.19787e+07	1.04435e+07	2.02885e+07	2.52122e+07	2.29918e+07	1.34901e+07	1.0603e+07	1.28914e+07	3.19621e+07	3.16433e+07	3.22603e+07	P07478	Trypsin-2 (EC 3.4.21.4) (Anionic trypsinogen) (Serine protease 2) (Trypsin II)
sp|P07737|PROF1_HUMAN	404245	409425	430525	167149	134723	246308	217509	184955	318019	149198	233503	121127	256869	277445	102404	P07737	Profilin-1 (Epididymis tissue protein Li 184a) (Profilin I)
sp|P08493|MGP_HUMAN	91841.1	78731.5	80223.4	49377.6	41966.7	40634.2	106890	103520	96703.5	43053	52907.8	45700.8	124854	140021	109870	P08493	Matrix Gla protein (MGP) (Cell growth-inhibiting gene 36 protein)
sp|P08697|A2AP_HUMAN	1.98687e+07	2.10051e+07	2.10746e+07	1.7923e+07	1.03998e+07	1.07123e+07	3.14537e+07	2.27638e+07	2.00465e+07	1.54725e+07	1.49685e+07	1.02062e+07	2.43667e+07	3.14138e+07	2.45934e+07	P08697	Alpha-2-antiplasmin (Alpha-2-AP) (Alpha-2-plasmin inhibitor) (Alpha-2-PI) (Serpin F2)
sp|P09172|DOPO_HUMAN	530081	454081	463745	313820	284020	284580	380928	304843	289065	230007	263355	221307	427422	324346	285444	P09172	Dopamine beta-hydroxylase (EC 1.14.17.1) (Dopamine beta-monooxygenase) [Cleaved into: Soluble dopamine beta-hydroxylase]
sp|P0C0L5|CO4B_HUMAN	7.49796e+07	7.67765e+07	7.66026e+07	4.73352e+07	5.44114e+07	4.90776e+07	6.29072e+07	6.3056e+07	6.89069e+07	5.83018e+07	5.38016e+07	5.45136e+07	8.08039e+07	6.84215e+07	8.04378e+07	P0C0L5	Complement C4-B (Basic complement C4) (C3 and PZP-like alpha-2-macroglobulin domain-containing protein 3) [Cleaved into: Complement C4 beta chain; Complement C4-B alpha chain; C4a anaphylatoxin; C4b-B; C4d-B; Complement C4 gamma chain]
sp|P0CG06|LAC3_HUMAN	86827.5	64752.4	39912.4	4037.87	13190.8	17850.1	17012.3	10478.6	7181.24	6604.76	14929.2	4592.96	23439.9	7841.34	29350.5	P0CG06	Ig lambda-3 chain C regions
sp|P0CG38|POTEI_HUMAN	818215	752137	775266	455181	450730	437576	762752	753486	1.00645e+06	528346	617185	577914	745508	506081	807091	P0CG38	POTE ankyrin domain family member I
sp|P10643|CO7_HUMAN	2.2505e+07	2.35578e+07	2.37041e+07	2.1294e+07	1.93658e+07	1.90287e+07	2.5963e+07	2.58379e+07	2.48529e+07	1.70043e+07	1.64973e+07	1.69734e+07	2.28604e+07	2.58074e+07	2.34239e+07	P10643	Complement component C7
sp|P10720|PF4V_HUMAN	1.16061e+06	1.32791e+06	1.35063e+06	799997	916054	831277	1.26938e+06	1.23354e+06	1.37475e+06	979890	717869	938362	2.99327e+06	2.66632e+06	3.25254e+06	P10720	Platelet factor 4 variant (C-X-C motif chemokine 4 variant) (CXCL4L1) (PF4alt) (PF4var1) [Cleaved into: Platelet factor 4 variant(4-74); Platelet factor 4 variant(5-74); Platelet factor 4 variant(6-74)]
sp|P16070|CD44_HUMAN	1.85928e+06	1.88542e+06	1.95026e+06	997389	1.09104e+06	1.07825e+06	1.76022e+06	1.77495e+06	1.6952e+06	1.07153e+06	1.09506e+06	1.11941e+06	2.37606e+06	2.50229e+06	2.71863e+06	P16070	CD44 antigen (CDw44) (Epican) (Extracellular matrix receptor III) (ECMR-III) (GP90 lymphocyte homing/adhesion receptor) (HUTCH-I) (Heparan sulfate proteoglycan) (Hermes antigen) (Hyaluronate receptor) (Phagocytic glycoprotein 1) (PGP-1) (Phagocytic glycoprotein I) (PGP-I) (CD antigen CD44)
sp|P16581|LYAM2_HUMAN	967449	705216	733901	462345	707835	753003	808315	832291	945588	594918	732202	676311	1.38065e+06	1.42805e+06	1.52334e+06	P16581	E-selectin (CD62 antigen-like family member E) (Endothelial leukocyte adhesion molecule 1) (ELAM-1) (Leukocyte-endothelial cell adhesion molecule 2) (LECAM2) (CD antigen CD62E)
sp|P17936|IBP3_HUMAN	4.50432e+06	4.82705e+06	4.79834e+06	3.64656e+06	3.07418e+06	2.80291e+06	4.59234e+06	4.52936e+06	4.69847e+06	2.96113e+06	2.91696e+06	3.0159e+06	6.4155e+06	6.7955e+06	7.03998e+06	P17936	Insulin-like growth factor-binding protein 3 (IBP-3) (IGF-binding protein 3) (IGFBP-3)
sp|P18065|IBP2_HUMAN	495492	434005	437843	359110	236396	267112	612238	498268	533899	371271	335659	263304	581906	701410	502584	P18065	Insulin-like growth factor-binding protein 2 (IBP-2) (IGF-binding protein 2) (IGFBP-2)
sp|P23142|FBLN1_HUMAN	8.80012e+06	8.50471e+06	8.27657e+06	5.01395e+06	5.13959e+06	5.55491e+06	9.42522e+06	9.25401e+06	8.44165e+06	4.83041e+06	5.70754e+06	5.37192e+06	8.19511e+06	8.91437e+06	8.22606e+06	P23142	Fibulin-1 (FIBL-1)
sp|P24592|IBP6_HUMAN	250924	282030	277638	93827.4	145107	141409	183595	186662	237946	164982	144769	169818	252414	197960	256391	P24592	Insulin-like growth factor-binding protein 6 (IBP-6) (IGF-binding protein 6) (IGFBP-6)
sp|P24593|IBP5_HUMAN	95095	97081.3	96394.8	21075.4	46114.8	9330.09	141196	115730	93065.5	46484.7	59154.3	49922	161524	183194	145089	P24593	Insulin-like growth factor-binding protein 5 (IBP-5) (IGF-binding protein 5) (IGFBP-5)
sp|P27918|PROP_HUMAN	4.60867e+06	5.13205e+06	4.87425e+06	4.32076e+06	3.56601e+06	3.59007e+06	5.16527e+06	4.81356e+06	4.85241e+06	2.78574e+06	2.61053e+06	2.91109e+06	5.10068e+06	6.38823e+06	4.99374e+06	P27918	Properdin (Complement factor P)
sp|P36980|FHR2_HUMAN	3.66047e+06	3.74116e+06	3.62784e+06	3.57842e+06	2.98617e+06	3.29245e+06	4.30946e+06	4.19906e+06	3.35247e+06	2.69519e+06	3.19987e+06	3.03512e+06	4.98868e+06	5.87097e+06	4.80215e+06	P36980	Complement factor H-related protein 2 (FHR-2) (DDESK59) (H factor-like 3) (H factor-like protein 2)
sp|P37802|TAGL2_HUMAN	39403.7	36502.2	27903.9	9042.48	5153.88	5566.73	41572.7	40632.5	37160.6	13177.3	5384.72	15539.4	40314.8	40876.1	51823.2	P37802	Transgelin-2 (Epididymis tissue protein Li 7e) (SM22-alpha homolog)
sp|P49747|COMP_HUMAN	1.04641e+06	1.01662e+06	1.06134e+06	710504	540448	693830	944660	800913	767029	624490	680530	572285	687561	662618	629896	P49747	Cartilage oligomeric matrix protein (COMP) (Thrombospondin-5) (TSP5)
sp|P54108|CRIS3_HUMAN	90085.6	91045.3	112853	13219.5	18116.9	19302.1	96635.5	104137	66466.4	2800.93	8259.47	25246.8	108248	120745	118921	P54108	Cysteine-rich secretory protein 3 (CRISP-3) (Specific granule protein of 28 kDa) (SGP28)
sp|P59666|DEF3_HUMAN	347215	324776	328901	164640	206512	259040	307404	274411	220816	153608	178241	182780	595831	664727	536094	P59666	Neutrophil defensin 3 (Defensin, alpha 3) (HNP-3) (HP-3) (HP3) [Cleaved into: HP 3-56; Neutrophil defensin 2 (HNP-2) (HP-2) (HP2)]
sp|P62937|PPIA_HUMAN	126555	121535	88803.5	52746.5	78805.5	62668.4	121560	124031	107613	114575	85608.5	78226.9	69237.1	128358	102293	P62937	Peptidyl-prolyl cis-trans isomerase A (PPIase A) (EC 5.2.1.8) (Cyclophilin A) (Cyclosporin A-binding protein) (Rotamase A) [Cleaved into: Peptidyl-prolyl cis-trans isomerase A, N-terminally processed]
sp|Q03591|FHR1_HUMAN	3.5124e+06	3.31375e+06	3.18973e+06	2.93152e+06	2.46539e+06	2.75488e+06	3.21489e+06	3.26194e+06	2.79629e+06	2.45736e+06	3.17318e+06	2.79166e+06	4.5582e+06	5.22103e+06	4.30064e+06	Q03591	Complement factor H-related protein 1 (FHR-1) (H factor-like protein 1) (H-factor-like 1) (H36)
sp|Q13418|ILK_HUMAN	3442.44	2257.41	4172.62	1482.9	1778.1	976.037	3375.95	2171.12	1986.22	1662.95	2329.38	1195.68	3042.56	3316.15	1930.9	Q13418	Integrin-linked protein kinase (EC 2.7.11.1) (59 kDa serine/threonine-protein kinase) (ILK-1) (ILK-2) (p59ILK)
sp|Q6UXS9|CASPC_HUMAN	3.61655e+06	4.66089e+06	4.22955e+06	2.82205e+06	2.6777e+06	2.32938e+06	4.31351e+06	4.89395e+06	4.18116e+06	1.16222e+06	2.41487e+06	2.60675e+06	7.19347e+06	7.06479e+06	7.17516e+06	Q6UXS9	Inactive caspase-12 (CASP-12)
sp|Q8IXM7|OD3L1_HUMAN	5.06429e+06	3.83471e+06	3.68979e+06	2.44484e+06	2.08867e+06	2.28413e+06	4.34531e+06	4.16369e+06	4.63663e+06	1.59023e+06	1.89779e+06	1.78175e+06	5.55489e+06	5.19095e+06	4.70207e+06	Q8IXM7	Outer dense fiber protein 3-like protein 1
sp|Q96NZ9|PRAP1_HUMAN	58891.1	58298.7	58879.7	23141.8	42489.5	45940.8	79926.6	67950.4	71698.2	41733	36461	36699.1	84728.5	48942.2	62520.7	Q96NZ9	Proline-rich acidic protein 1 (Epididymis tissue protein Li 178) (Uterine-specific proline-rich acidic protein)
sp|Q9NQ79|CRAC1_HUMAN	645943	765502	759688	531945	527258	530182	759842	796524	708400	507599	478788	490050	849719	691711	857104	Q9NQ79	Cartilage acidic protein 1 (68 kDa chondrocyte-expressed protein) (CEP-68) (ASPIC)
sp|O00391|QSOX1_HUMAN	409149	742620	380141	692666	451656	507916	324525	228510	274041	472884	484419	771710	209408	102746	236215	O00391	Sulfhydryl oxidase 1 (hQSOX) (EC 1.8.3.2) (Quiescin Q6)
sp|O14498|ISLR_HUMAN	28105.3	25399.3	22621.8	23738.3	22198.8	22946.2	4712.3	29157.3	26738.3	18935.6	30015.5	25044	4213.16	4439.32	12124	O14498	Immunoglobulin superfamily containing leucine-rich repeat protein
sp|O14786|NRP1_HUMAN	38675.9	34239.5	68528.5	94142.7	73183.2	90157.2	41684.7	84689.4	91200.9	54603.5	93963.2	66379.9	26702.5	32289.1	27352.1	O14786	Neuropilin-1 (Vascular endothelial cell growth factor 165 receptor) (CD antigen CD304)
sp|O14791|APOL1_HUMAN	137332	119861	136974	107401	105408	89498	75515.9	65640.4	64706.7	111873	107192	129622	37160.7	23810.5	35932	O14791	Apolipoprotein L1 (Apolipoprotein L) (Apo-L) (ApoL) (Apolipoprotein L-I) (ApoL-I)
sp|O75144|ICOSL_HUMAN	84423	89993.4	92053	109752	112685	82536.5	68100.5	74127.5	81334.6	110454	65790.6	102239	32034.3	55743.5	51154.2	O75144	ICOS ligand (B7 homolog 2) (B7-H2) (B7-like protein Gl50) (B7-related protein 1) (B7RP-1) (CD antigen CD275)
sp|O75636|FCN3_HUMAN	2.19248e+06	2.17966e+06	2.24195e+06	3.39277e+06	3.4204e+06	3.59669e+06	1.94433e+06	1.8875e+06	1.88035e+06	3.63824e+06	3.59063e+06	3.79509e+06	1.04353e+06	1.26805e+06	1.16978e+06	O75636	Ficolin-3 (Collagen/fibrinogen domain-containing lectin 3 p35) (Collagen/fibrinogen domain-containing protein 3) (Hakata antigen)
sp|O75882|ATRN_HUMAN	1.08763e+06	1.07779e+06	937043	1.49494e+06	1.2969e+06	1.37159e+06	824326	846162	814908	1.01041e+06	1.26583e+06	1.16904e+06	439052	576679	312081	O75882	Attractin (DPPT-L) (Mahogany homolog)
sp|P00450|CERU_HUMAN	2.72839e+07	2.68636e+07	2.76874e+07	6.99867e+07	6.85971e+07	6.50999e+07	1.49288e+07	1.99943e+07	1.95471e+07	8.36652e+07	7.61352e+07	7.77503e+07	6.29018e+06	6.95019e+06	4.78501e+06	P00450	Ceruloplasmin (EC 1.16.3.1) (Ferroxidase)
sp|P00736|C1R_HUMAN	1.95411e+07	1.80785e+07	1.82733e+07	1.64552e+07	1.97362e+07	1.93338e+07	1.62885e+07	1.66575e+07	1.88732e+07	1.93229e+07	2.00807e+07	1.90295e+07	1.32063e+07	1.13618e+07	1.30603e+07	P00736	Complement C1r subcomponent (EC 3.4.21.41) (Complement component 1 subcomponent r) [Cleaved into: Complement C1r subcomponent heavy chain; Complement C1r subcomponent light chain]
sp|P00746|CFAD_HUMAN	1.61613e+06	1.56638e+06	1.61847e+06	1.14934e+06	1.60994e+06	1.44196e+06	1.25899e+06	1.1939e+06	1.46024e+06	1.46939e+06	1.3113e+06	1.30792e+06	944564	770294	958753	P00746	Complement factor D (EC 3.4.21.46) (Adipsin) (C3 convertase activator) (Properdin factor D)
sp|P00748|FA12_HUMAN	1.90512e+07	1.76664e+07	1.88546e+07	1.56881e+07	1.75854e+07	1.79211e+07	1.68399e+07	1.55598e+07	1.71429e+07	1.70179e+07	1.64296e+07	1.7422e+07	1.09611e+07	1.05914e+07	1.10996e+07	P00748	Coagulation factor XII (EC 3.4.21.38) (Hageman factor) (HAF) [Cleaved into: Coagulation factor XIIa heavy chain; Beta-factor XIIa part 1; Coagulation factor XIIa light chain (Beta-factor XIIa part 2)]
sp|P01019|ANGT_HUMAN	1.82659e+06	1.67148e+06	1.6004e+06	3.85723e+06	4.03146e+06	3.99831e+06	1.55017e+06	1.44106e+06	1.6374e+06	3.92672e+06	4.12745e+06	4.05289e+06	533870	401690	574055	P01019	Angiotensinogen (Serpin A8) [Cleaved into: Angiotensin-1 (Angiotensin 1-10) (Angiotensin I) (Ang I); Angiotensin-2 (Angiotensin 1-8) (Angiotensin II) (Ang II); Angiotensin-3 (Angiotensin 2-8) (Angiotensin III) (Ang III) (Des-Asp[1]-angiotensin II); Angiotensin-4 (Angiotensin 3-8) (Angiotensin IV) (Ang IV); Angiotensin 1-9; Angiotensin 1-7; Angiotensin 1-5; Angiotensin 1-4]
sp|P01031|CO5_HUMAN	1.60431e+07	1.58841e+07	1.5112e+07	1.90418e+07	1.65256e+07	1.8044e+07	1.59074e+07	1.6507e+07	1.39487e+07	1.7563e+07	1.95226e+07	1.83471e+07	9.7617e+06	1.14538e+07	1.00615e+07	P01031	Complement C5 (C3 and PZP-like alpha-2-macroglobulin domain-containing protein 4) [Cleaved into: Complement C5 beta chain; Complement C5 alpha chain; C5a anaphylatoxin; Complement C5 alpha' chain]
sp|P02100|HBE_HUMAN	78073.9	146988	133255	93899.3	114463	122104	39852.3	164281	156588	498679	555146	487751	39452.7	100920	75121.9	P02100	Hemoglobin subunit epsilon (Epsilon-globin) (Hemoglobin epsilon chain)
sp|P02647|APOA1_HUMAN	221557	157481	312424	274629	190877	173032	118325	133525	86520.8	292080	181747	260159	120406	86009	128361	P02647	Apolipoprotein A-I (Apo-AI) (ApoA-I) (Apolipoprotein A1) [Cleaved into: Proapolipoprotein A-I (ProapoA-I); Truncated apolipoprotein A-I (Apolipoprotein A-I(1-242))]
sp|P02649|APOE_HUMAN	1.08357e+07	1.07428e+07	1.08404e+07	2.10162e+07	1.74915e+07	1.8985e+07	1.12154e+07	1.02473e+07	9.17884e+06	1.8229e+07	1.92458e+07	1.95583e+07	4.45474e+06	5.49746e+06	4.297e+06	P02649	Apolipoprotein E (Apo-E)
sp|P02655|APOC2_HUMAN	1.94676e+06	2.61397e+06	2.69711e+06	4.78226e+06	4.06855e+06	4.62423e+06	3.34959e+06	1.82412e+06	1.96513e+06	4.09422e+06	5.01982e+06	4.51231e+06	1.59425e+06	984424	1.03535e+06	P02655	Apolipoprotein C-II (Apo-CII) (ApoC-II) (Apolipoprotein C2) [Cleaved into: Proapolipoprotein C-II (ProapoC-II)]
sp|P02656|APOC3_HUMAN	2.0987e+07	2.13068e+07	2.07484e+07	2.56947e+07	2.30443e+07	2.41808e+07	2.02487e+07	2.05416e+07	1.67328e+07	2.12962e+07	2.18338e+07	2.1426e+07	1.22668e+07	1.38637e+07	1.18635e+07	P02656	Apolipoprotein C-III (Apo-CIII) (ApoC-III) (Apolipoprotein C3)
sp|P02746|C1QB_HUMAN	2.0914e+06	1.93406e+06	1.78001e+06	4.63922e+06	6.74051e+06	7.2593e+06	1.62959e+06	1.74022e+06	1.70445e+06	9.87424e+06	1.02029e+07	1.04187e+07	354368	597487	572818	P02746	Complement C1q subcomponent subunit B
sp|P02747|C1QC_HUMAN	3.9079e+06	3.98181e+06	6.33595e+06	1.88243e+07	1.75917e+07	1.91496e+07	3.71838e+06	3.72312e+06	3.63136e+06	1.21261e+07	1.66816e+07	1.58503e+07	1.13093e+06	1.3664e+06	988147	P02747	Complement C1q subcomponent subunit C
sp|P02748|CO9_HUMAN	2.72564e+07	3.0018e+07	2.96153e+07	3.41974e+07	3.27674e+07	3.04511e+07	2.91508e+07	3.03317e+07	2.99175e+07	3.87361e+07	3.41707e+07	3.56968e+07	1.95088e+07	2.12603e+07	2.01284e+07	P02748	Complement component C9 [Cleaved into: Complement component C9a; Complement component C9b]
sp|P02750|A2GL_HUMAN	391668	318338	285910	894911	688086	731705	364041	297771	506117	785137	783108	755865	78022.6	43989.3	94719	P02750	Leucine-rich alpha-2-glycoprotein (LRG)
sp|P02753|RET4_HUMAN	1.97293e+07	1.94322e+07	1.95142e+07	2.59546e+07	2.66412e+07	2.71892e+07	1.84971e+07	1.82865e+07	1.92156e+07	2.04348e+07	2.17413e+07	2.07201e+07	1.56074e+07	1.53062e+07	1.5438e+07	P02753	Retinol-binding protein 4 (Plasma retinol-binding protein) (PRBP) (RBP) [Cleaved into: Plasma retinol-binding protein(1-182); Plasma retinol-binding protein(1-181); Plasma retinol-binding protein(1-179); Plasma retinol-binding protein(1-176)]
sp|P02774|VTDB_HUMAN	4.90389e+07	4.73563e+07	4.84919e+07	4.00936e+07	4.40224e+07	4.13548e+07	4.36304e+07	4.3843e+07	4.32479e+07	4.21731e+07	3.84831e+07	4.11637e+07	3.05802e+07	2.73282e+07	2.89569e+07	P02774	Vitamin D-binding protein (DBP) (VDB) (Gc protein-derived macrophage activating factor) (Gc-MAF) (GcMAF) (Gc-globulin) (Group-specific component) (Gc) (Vitamin D-binding protein-macrophage activating factor) (DBP-maf)
sp|P02790|HEMO_HUMAN	1.73501e+08	1.64153e+08	1.64876e+08	1.13646e+08	1.50552e+08	1.54454e+08	1.576e+08	1.66928e+08	1.58943e+08	1.47458e+08	1.68782e+08	1.5353e+08	9.93475e+07	8.56514e+07	9.90512e+07	P02790	Hemopexin (Beta-1B-glycoprotein)
sp|P02792|FRIL_HUMAN	29053.8	16287.9	11113	16698.5	28058	21802.5	27242.9	25849.1	31335.2	27875.2	23029.3	19250.6	15520.7	8619.68	8204.98	P02792	Ferritin light chain (Ferritin L subunit)
sp|P04003|C4BPA_HUMAN	2.04074e+07	1.82438e+07	1.76536e+07	2.56025e+07	2.47574e+07	2.52965e+07	1.93874e+07	1.8926e+07	1.81078e+07	2.03392e+07	2.51093e+07	2.29839e+07	8.95797e+06	1.01605e+07	9.56355e+06	P04003	C4b-binding protein alpha chain (C4bp) (Proline-rich protein) (PRP)
sp|P04070|PROC_HUMAN	1.0021e+06	1.00383e+06	956435	863409	1.15447e+06	1.17132e+06	785697	558385	763918	1.12678e+06	1.07911e+06	1.00862e+06	367479	704464	744354	P04070	Vitamin K-dependent protein C (EC 3.4.21.69) (Anticoagulant protein C) (Autoprothrombin IIA) (Blood coagulation factor XIV) [Cleaved into: Vitamin K-dependent protein C light chain; Vitamin K-dependent protein C heavy chain; Activation peptide]
sp|P04114|APOB_HUMAN	1.24526e+07	1.33134e+07	1.28559e+07	4.41006e+07	3.99001e+07	3.82081e+07	1.16965e+07	1.12443e+07	1.0633e+07	3.49611e+07	3.15371e+07	3.31415e+07	2.82088e+06	4.55785e+06	3.9018e+06	P04114	Apolipoprotein B-100 (Apo B-100) [Cleaved into: Apolipoprotein B-48 (Apo B-48)]
sp|P04196|HRG_HUMAN	2.16557e+07	1.4477e+07	2.19768e+07	1.61075e+07	2.18956e+07	2.22422e+07	1.4688e+07	1.37352e+07	2.40604e+07	1.57569e+07	1.53442e+07	2.08327e+07	1.34791e+07	7.70609e+06	1.02254e+07	P04196	Histidine-rich glycoprotein (Histidine-proline-rich glycoprotein) (HPRG)
sp|P04264|K2C1_HUMAN	157100	38799	110931	103872	94900.5	94780.1	137863	60580.6	117042	97765.9	109626	77686.8	36095.4	26053	30374	P04264	Keratin, type II cytoskeletal 1 (67 kDa cytokeratin) (Cytokeratin-1) (CK-1) (Hair alpha protein) (Keratin-1) (K1) (Type-II keratin Kb1)
sp|P04278|SHBG_HUMAN	1.45735e+06	1.5252e+06	1.58457e+06	1.56544e+06	1.4935e+06	1.3905e+06	1.19503e+06	690895	989533	1.89163e+06	1.59712e+06	1.69554e+06	513547	700107	462040	P04278	Sex hormone-binding globulin (SHBG) (Sex steroid-binding protein) (SBP) (Testis-specific androgen-binding protein) (ABP) (Testosterone-estradiol-binding globulin) (TeBG) (Testosterone-estrogen-binding globulin)
sp|P05155|IC1_HUMAN	4.25755e+06	4.86362e+06	4.78386e+06	5.73322e+06	5.2703e+06	4.89694e+06	4.92306e+06	4.90875e+06	4.69202e+06	5.45537e+06	4.80074e+06	5.12003e+06	1.80702e+06	1.89669e+06	1.85298e+06	P05155	Plasma protease C1 inhibitor (C1 Inh) (C1Inh) (C1 esterase inhibitor) (C1-inhibiting factor) (Serpin G1)
sp|P05160|F13B_HUMAN	3.85842e+06	3.71379e+06	3.74663e+06	3.90417e+06	3.77015e+06	3.89949e+06	3.38894e+06	3.08068e+06	3.14694e+06	4.1664e+06	4.23658e+06	4.3742e+06	1.86357e+06	2.14932e+06	2.27688e+06	P05160	Coagulation factor XIII B chain (Fibrin-stabilizing factor B subunit) (Protein-glutamine gamma-glutamyltransferase B chain) (Transglutaminase B chain)
sp|P05546|HEP2_HUMAN	1.26405e+06	1.5168e+06	1.32761e+06	5.0432e+06	4.31309e+06	3.99769e+06	1.55362e+06	1.96369e+06	2.07275e+06	3.41166e+06	2.94319e+06	3.55489e+06	791185	732983	924793	P05546	Heparin cofactor 2 (Heparin cofactor II) (HC-II) (Protease inhibitor leuserpin-2) (HLS2) (Serpin D1)
sp|P06396|GELS_HUMAN	6.54278e+06	6.79874e+06	6.80216e+06	1.70557e+07	1.64202e+07	1.69619e+07	7.57698e+06	7.68666e+06	6.71749e+06	1.62725e+07	1.60527e+07	1.59121e+07	2.97177e+06	2.36663e+06	2.81094e+06	P06396	Gelsolin (AGEL) (Actin-depolymerizing factor) (ADF) (Brevin)
sp|P06681|CO2_HUMAN	8.28831e+06	7.882e+06	8.32479e+06	7.56016e+06	9.38097e+06	9.48847e+06	7.9694e+06	7.52313e+06	8.56876e+06	1.02091e+07	8.3408e+06	9.39171e+06	5.39285e+06	4.47029e+06	5.38087e+06	P06681	Complement C2 (EC 3.4.21.43) (C3/C5 convertase) [Cleaved into: Complement C2b fragment; Complement C2a fragment]
sp|P06727|APOA4_HUMAN	3.63477e+07	3.75408e+07	3.913e+07	3.74947e+07	3.90908e+07	3.82219e+07	2.47981e+07	2.45007e+07	2.40876e+07	4.23114e+07	3.80538e+07	4.23838e+07	7.69231e+06	6.51425e+06	6.33152e+06	P06727	Apolipoprotein A-IV (Apo-AIV) (ApoA-IV) (Apolipoprotein A4)
sp|P07339|CATD_HUMAN	55651.5	74126.5	69715.5	130155	104178	90006.4	59396.4	96558.3	4133.12	106747	70692	96223.2	4333.02	28454.2	2424.44	P07339	Cathepsin D (EC 3.4.23.5) [Cleaved into: Cathepsin D light chain; Cathepsin D heavy chain]
sp|P07359|GP1BA_HUMAN	162545	131486	139907	712027	572284	488224	179345	151118	135952	605572	316598	426621	50674.7	86466.4	34649.5	P07359	Platelet glycoprotein Ib alpha chain (GP-Ib alpha) (GPIb-alpha) (GPIbA) (Glycoprotein Ibalpha) (Antigen CD42b-alpha) (CD antigen CD42b) [Cleaved into: Glycocalicin]
sp|P07360|CO8G_HUMAN	8.63154e+06	9.06189e+06	9.17513e+06	1.20286e+07	1.13919e+07	1.09419e+07	9.36958e+06	9.03391e+06	8.85406e+06	1.13935e+07	1.03473e+07	1.06624e+07	4.56457e+06	4.29814e+06	4.59915e+06	P07360	Complement component C8 gamma chain
sp|P08571|CD14_HUMAN	1.4708e+06	1.10826e+06	1.22407e+06	1.22271e+06	1.11047e+06	1.14721e+06	908838	1.3637e+06	928632	1.70375e+06	1.32182e+06	1.57169e+06	845824	769762	867064	P08571	Monocyte differentiation antigen CD14 (Myeloid cell-specific leucine-rich glycoprotein) (CD antigen CD14) [Cleaved into: Monocyte differentiation antigen CD14, urinary form; Monocyte differentiation antigen CD14, membrane-bound form]
sp|P08603|CFAH_HUMAN	3.54979e+07	3.27347e+07	3.46218e+07	4.5081e+07	4.51074e+07	4.85975e+07	3.66126e+07	3.94058e+07	3.64559e+07	3.92781e+07	4.03545e+07	3.89641e+07	2.8307e+07	2.6123e+07	2.5698e+07	P08603	Complement factor H (H factor 1)
sp|P08709|FA7_HUMAN	103471	136106	92210.5	110106	127276	118959	52683.7	57592.1	86378.2	87232.1	123731	184392	44345.4	20436.1	45426.5	P08709	Coagulation factor VII (EC 3.4.21.21) (Proconvertin) (Serum prothrombin conversion accelerator) (SPCA) (Eptacog alfa) [Cleaved into: Factor VII light chain; Factor VII heavy chain]
sp|P10909|CLUS_HUMAN	2.35194e+07	2.63919e+07	2.64286e+07	4.25237e+07	3.54922e+07	3.32494e+07	2.46613e+07	2.37998e+07	2.10585e+07	3.71234e+07	3.10162e+07	3.63633e+07	8.6098e+06	9.79613e+06	8.19846e+06	P10909	Clusterin (Aging-associated gene 4 protein) (Apolipoprotein J) (Apo-J) (Complement cytolysis inhibitor) (CLI) (Complement-associated protein SP-40,40) (Ku70-binding protein 1) (NA1/NA2) (Testosterone-repressed prostate message 2) (TRPM-2) [Cleaved into: Clusterin beta chain (ApoJalpha) (Complement cytolysis inhibitor a chain); Clusterin alpha chain (ApoJbeta) (Complement cytolysis inhibitor b cha…
sp|P12259|FA5_HUMAN	2.48646e+06	2.8319e+06	2.74686e+06	3.50928e+06	3.2032e+06	3.03188e+06	2.85798e+06	2.5627e+06	2.6384e+06	3.33182e+06	3.03354e+06	3.25767e+06	1.9131e+06	2.1928e+06	1.97657e+06	P12259	Coagulation factor V (Activated protein C cofactor) (Proaccelerin, labile factor) [Cleaved into: Coagulation factor V heavy chain; Coagulation factor V light chain]
sp|P18428|LBP_HUMAN	65860.5	80192.4	8483.48	258968	238918	194168	93834.9	86375.6	95250.1	242896	178954	208760	40678.3	11389.1	6995.1	P18428	Lipopolysaccharide-binding protein (LBP)
sp|P19022|CADH2_HUMAN	409120	414905	469928	608383	695215	607550	391839	345601	465993	684764	597094	737245	172216	192125	205185	P19022	Cadherin-2 (CDw325) (Neural cadherin) (N-cadherin) (CD antigen CD325)
sp|P19823|ITIH2_HUMAN	4.74926e+07	5.03351e+07	5.04122e+07	7.81857e+07	7.08862e+07	7.08141e+07	4.96945e+07	4.81032e+07	4.32587e+07	7.06308e+07	7.07628e+07	7.12502e+07	1.82582e+07	2.0203e+07	1.76129e+07	P19823	Inter-alpha-trypsin inhibitor heavy chain H2 (ITI heavy chain H2) (ITI-HC2) (Inter-alpha-inhibitor heavy chain 2) (Inter-alpha-trypsin inhibitor complex component II) (Serum-derived hyaluronan-associated protein) (SHAP)
sp|P19827|ITIH1_HUMAN	1.83667e+07	1.71849e+07	1.79417e+07	5.30328e+07	4.57077e+07	4.64477e+07	2.29161e+07	2.21565e+07	1.8451e+07	4.11072e+07	4.31134e+07	4.25766e+07	6.52596e+06	7.38537e+06	6.46166e+06	P19827	Inter-alpha-trypsin inhibitor heavy chain H1 (ITI heavy chain H1) (ITI-HC1) (Inter-alpha-inhibitor heavy chain 1) (Inter-alpha-trypsin inhibitor complex component III) (Serum-derived hyaluronan-associated protein) (SHAP)
sp|P20742|PZP_HUMAN	552753	446916	556918	478827	505101	424784	363747	482605	634393	853666	805175	831530	253872	206746	446241	P20742	Pregnancy zone protein (C3 and PZP-like alpha-2-macroglobulin domain-containing protein 6)
sp|P20851|C4BPB_HUMAN	2.08545e+06	2.05305e+06	1.98701e+06	2.79187e+06	2.43978e+06	2.58853e+06	2.01057e+06	2.07414e+06	1.82583e+06	2.41372e+06	2.61909e+06	2.53938e+06	856211	999531	771655	P20851	C4b-binding protein beta chain
sp|P22792|CPN2_HUMAN	6.17135e+06	6.05352e+06	6.18163e+06	7.39355e+06	7.16123e+06	7.67791e+06	7.0274e+06	6.33829e+06	5.73949e+06	5.94596e+06	6.67457e+06	6.63405e+06	3.61182e+06	4.16704e+06	3.40667e+06	P22792	Carboxypeptidase N subunit 2 (Carboxypeptidase N 83 kDa chain) (Carboxypeptidase N large subunit) (Carboxypeptidase N polypeptide 2) (Carboxypeptidase N regulatory subunit)
sp|P22891|PROZ_HUMAN	1.01843e+06	1.06456e+06	1.08285e+06	1.16717e+06	1.21884e+06	1.20313e+06	696018	687602	913551	987806	990330	1.03189e+06	416153	408488	494451	P22891	Vitamin K-dependent protein Z
sp|P27169|PON1_HUMAN	3.4272e+06	3.64546e+06	3.47159e+06	4.64002e+06	3.98113e+06	3.20617e+06	2.5992e+06	2.79418e+06	2.4109e+06	5.73342e+06	4.81184e+06	5.35592e+06	1.57833e+06	1.01657e+06	1.19521e+06	P27169	Serum paraoxonase/arylesterase 1 (PON 1) (EC 3.1.1.2) (EC 3.1.1.81) (EC 3.1.8.1) (Aromatic esterase 1) (A-esterase 1) (K-45) (Serum aryldialkylphosphatase 1)
sp|P29622|KAIN_HUMAN	58588.1	38477.5	47461.3	358532	270108	271512	78036	59780.9	91286.4	174334	134947	129810	33382	16748.9	37923.3	P29622	Kallistatin (Kallikrein inhibitor) (Peptidase inhibitor 4) (PI-4) (Serpin A4)
sp|P32119|PRDX2_HUMAN	889318	878384	898830	957102	968482	799980	732962	682556	719065	1.93336e+06	1.11216e+06	1.9596e+06	210953	283458	157594	P32119	Peroxiredoxin-2 (EC 1.11.1.15) (Natural killer cell-enhancing factor B) (NKEF-B) (PRP) (Thiol-specific antioxidant protein) (TSA) (Thioredoxin peroxidase 1) (Thioredoxin-dependent peroxide reductase 1)
sp|P33151|CADH5_HUMAN	1.05465e+06	1.22225e+06	1.25792e+06	653074	759007	550109	940616	978113	861898	1.3108e+06	789129	1.38017e+06	221038	237307	368530	P33151	Cadherin-5 (7B4 antigen) (Vascular endothelial cadherin) (VE-cadherin) (CD antigen CD144)
sp|P35442|TSP2_HUMAN	129541	93496.5	92583.8	83754.2	86009.4	94837.7	76888.6	78409.5	97233.4	64659.6	74366.6	91660.4	57930.3	45466.7	48356	P35442	Thrombospondin-2
sp|P35542|SAA4_HUMAN	351582	267523	311642	303032	275446	376111	259274	242065	289686	544531	572871	599906	122026	129709	199795	P35542	Serum amyloid A-4 protein (Constitutively expressed serum amyloid A protein) (C-SAA)
sp|P35858|ALS_HUMAN	5.51121e+06	5.31956e+06	5.51125e+06	9.72967e+06	9.16994e+06	8.96707e+06	4.22666e+06	4.11958e+06	4.34197e+06	8.92239e+06	8.99164e+06	9.20637e+06	1.62532e+06	1.76568e+06	1.54002e+06	P35858	Insulin-like growth factor-binding protein complex acid labile subunit (ALS)
sp|P43251|BTD_HUMAN	277949	332531	361818	1.17848e+06	986651	814708	454062	436316	443269	885027	664753	816742	239415	247539	257589	P43251	Biotinidase (Biotinase) (EC 3.5.1.12)
sp|P43652|AFAM_HUMAN	2.2613e+07	2.44368e+07	2.50404e+07	2.69738e+07	2.805e+07	2.60913e+07	2.17662e+07	2.17583e+07	2.20358e+07	2.71898e+07	2.20129e+07	2.50967e+07	7.41687e+06	7.06232e+06	7.31451e+06	P43652	Afamin (Alpha-albumin) (Alpha-Alb)
sp|P48740|MASP1_HUMAN	946348	1.01778e+06	933466	1.34106e+06	1.07955e+06	1.17343e+06	943761	963536	832593	935013	1.04595e+06	1.05818e+06	398513	379488	396089	P48740	Mannan-binding lectin serine protease 1 (EC 3.4.21.-) (Complement factor MASP-3) (Complement-activating component of Ra-reactive factor) (Mannose-binding lectin-associated serine protease 1) (MASP-1) (Mannose-binding protein-associated serine protease) (Ra-reactive factor serine protease p100) (RaRF) (Serine protease 5) [Cleaved into: Mannan-binding lectin serine protease 1 heavy chain; Mannan-bi…
sp|P68133|ACTS_HUMAN	110389	125143	109948	144941	134583	131330	17844.5	136550	100304	144876	143179	126124	28770.2	25830.6	48723.3	P68133	Actin, alpha skeletal muscle (Alpha-actin-1)
sp|P80108|PHLD_HUMAN	3.12191e+06	3.2954e+06	3.44363e+06	5.39174e+06	4.87192e+06	4.67331e+06	3.42073e+06	3.38103e+06	3.06695e+06	5.09061e+06	4.93399e+06	5.30763e+06	1.80272e+06	2.12589e+06	1.6854e+06	P80108	Phosphatidylinositol-glycan-specific phospholipase D (PI-G PLD) (EC 3.1.4.50) (Glycoprotein phospholipase D) (Glycosyl-phosphatidylinositol-specific phospholipase D) (GPI-PLD) (GPI-specific phospholipase D)
sp|Q04756|HGFA_HUMAN	1.57272e+06	1.77399e+06	1.86735e+06	2.13092e+06	2.02506e+06	1.7962e+06	1.55093e+06	1.51816e+06	1.61113e+06	1.77529e+06	1.57495e+06	1.65781e+06	1.39819e+06	1.0571e+06	892789	Q04756	Hepatocyte growth factor activator (HGF activator) (HGFA) (EC 3.4.21.-) [Cleaved into: Hepatocyte growth factor activator short chain; Hepatocyte growth factor activator long chain]
sp|Q06033|ITIH3_HUMAN	1.26534e+06	941875	1.3098e+06	1.89083e+06	1.83829e+06	1.82776e+06	1.01988e+06	1.10083e+06	1.09856e+06	3.31013e+06	2.91172e+06	3.06287e+06	580109	430659	432795	Q06033	Inter-alpha-trypsin inhibitor heavy chain H3 (ITI heavy chain H3) (ITI-HC3) (Inter-alpha-inhibitor heavy chain 3) (Serum-derived hyaluronan-associated protein) (SHAP)
sp|Q08830|FGL1_HUMAN	62953.6	80764.3	88459.5	113995	55937.1	46311.8	67556.7	74509.4	55074.1	116160	96672.2	111891	15333.4	11257.2	68880.1	Q08830	Fibrinogen-like protein 1 (HP-041) (Hepassocin) (Hepatocyte-derived fibrinogen-related protein 1) (HFREP-1) (Liver fibrinogen-related protein 1) (LFIRE-1)
sp|Q13822|ENPP2_HUMAN	152018	151815	109588	194441	102837	140001	166284	151380	108997	136034	119871	153593	93163.8	41006.7	70533.2	Q13822	Ectonucleotide pyrophosphatase/phosphodiesterase family member 2 (E-NPP 2) (EC 3.1.4.39) (Autotaxin) (Extracellular lysophospholipase D) (LysoPLD)
sp|Q14515|SPRL1_HUMAN	79946.3	97110.3	74440.9	65408.8	102477	70539.4	46084.6	37988.8	56780.5	93136.4	68402.7	81219.8	12654.3	23987.7	34933.1	Q14515	SPARC-like protein 1 (High endothelial venule protein) (Hevin) (MAST 9)
sp|Q15113|PCOC1_HUMAN	737102	884651	898702	664739	770190	677345	616847	642474	649273	762739	694976	760963	319160	408967	317944	Q15113	Procollagen C-endopeptidase enhancer 1 (Procollagen COOH-terminal proteinase enhancer 1) (PCPE-1) (Procollagen C-proteinase enhancer 1) (Type 1 procollagen C-proteinase enhancer protein) (Type I procollagen COOH-terminal proteinase enhancer)
sp|Q15848|ADIPO_HUMAN	52748.3	47520.1	36833.8	105024	84710	103323	46267.7	50195.7	24007.6	95369.3	107306	98526.8	31729.7	31282.6	52292.9	Q15848	Adiponectin (30 kDa adipocyte complement-related protein) (Adipocyte complement-related 30 kDa protein) (ACRP30) (Adipocyte, C1q and collagen domain-containing protein) (Adipose most abundant gene transcript 1 protein) (apM-1) (Gelatin-binding protein)
sp|Q6EMK4|VASN_HUMAN	1.10759e+06	1.03814e+06	984289	900243	1.23251e+06	887504	823362	797002	688016	1.58526e+06	872855	1.62849e+06	437745	589321	526411	Q6EMK4	Vasorin (Protein slit-like 2)
sp|Q6S8J3|POTEE_HUMAN	1.14492e+06	876013	950212	1.00141e+06	1.83637e+06	1.8757e+06	687954	555307	1.2349e+06	1.45503e+06	1.71399e+06	1.4643e+06	471455	329590	487410	Q6S8J3	POTE ankyrin domain family member E (ANKRD26-like family C member 1A) (Prostate, ovary, testis-expressed protein on chromosome 2) (POTE-2)
sp|Q96BY6|DOC10_HUMAN	129150	137831	122097	247619	279874	258804	120206	147669	105054	230633	234413	264964	49601.5	53639.1	71858.7	Q96BY6	Dedicator of cytokinesis protein 10 (Zizimin-3)
sp|Q96HD1|CREL1_HUMAN	14931.9	5853.38	19522.2	37267.3	8408.16	53153.6	19237.1	6788.62	2478.92	32942.9	35460.5	35277.4	4273.72	5723.68	8476.42	Q96HD1	Cysteine-rich with EGF-like domain protein 1
sp|Q96IY4|CBPB2_HUMAN	3.14904e+06	3.25709e+06	3.2268e+06	3.72629e+06	3.68727e+06	3.50821e+06	2.83879e+06	3.07021e+06	3.00861e+06	3.62212e+06	3.34818e+06	3.57271e+06	1.9581e+06	1.98151e+06	2.01739e+06	Q96IY4	Carboxypeptidase B2 (EC 3.4.17.20) (Carboxypeptidase U) (CPU) (Plasma carboxypeptidase B) (pCPB) (Thrombin-activable fibrinolysis inhibitor) (TAFI)
sp|Q96PD5|PGRP2_HUMAN	2.71019e+07	2.78227e+07	2.78445e+07	1.96265e+07	2.49931e+07	2.33028e+07	2.52537e+07	2.48329e+07	2.71671e+07	2.61956e+07	2.07075e+07	2.45343e+07	1.83125e+07	1.47742e+07	1.94724e+07	Q96PD5	N-acetylmuramoyl-L-alanine amidase (EC 3.5.1.28) (Peptidoglycan recognition protein 2) (Peptidoglycan recognition protein long) (PGRP-L)
sp|Q99453|PHX2B_HUMAN	57299.7	55711.2	52684	90240.7	82873.6	88462.7	40815.7	59872.3	48952.4	50785.3	67006.1	60103.1	29619.6	6906.5	25443.6	Q99453	Paired mesoderm homeobox protein 2B (Neuroblastoma Phox) (NBPhox) (PHOX2B homeodomain protein) (Paired-like homeobox 2B)
sp|Q9H4A9|DPEP2_HUMAN	8918.91	19272.9	14421.7	10041.6	11674.6	15149.9	16671.1	11626.5	12575.9	15664.1	14898.7	17651.5	3265.47	1601.34	10515.6	Q9H4A9	Dipeptidase 2 (EC 3.4.13.19)
sp|Q9H4B8|DPEP3_HUMAN	6566.76	9311.54	10563.5	4780.45	9555.11	6982.32	8298.46	6891.43	10032.8	10613.7	5218.46	9714.74	1996.09	590.206	425.19	Q9H4B8	Dipeptidase 3 (EC 3.4.13.19)
sp|Q9NPH3|IL1AP_HUMAN	192700	189365	176358	300221	301706	289609	113544	225206	172040	316464	326971	337553	121111	67144.5	53564.7	Q9NPH3	Interleukin-1 receptor accessory protein (IL-1 receptor accessory protein) (IL-1RAcP) (Interleukin-1 receptor 3) (IL-1R-3) (IL-1R3)
sp|Q9NPY3|C1QR1_HUMAN	158466	168698	172498	161876	171899	147091	128778	155939	155624	180620	111550	167488	120233	105771	57467.5	Q9NPY3	Complement component C1q receptor (C1q/MBL/SPA receptor) (C1qR) (C1qR(p)) (C1qRp) (CDw93) (Complement component 1 q subcomponent receptor 1) (Matrix-remodeling-associated protein 4) (CD antigen CD93)
sp|Q9UGM5|FETUB_HUMAN	3.22178e+06	3.65416e+06	3.61636e+06	4.09775e+06	3.50154e+06	3.29834e+06	2.93418e+06	3.16962e+06	3.29013e+06	4.33138e+06	4.22355e+06	4.25754e+06	1.56078e+06	1.86494e+06	1.55874e+06	Q9UGM5	Fetuin-B (16G2) (Fetuin-like protein IRL685) (Gugu)
sp|Q9UK55|ZPI_HUMAN	877190	887740	885658	1.01616e+06	1.05053e+06	1.05778e+06	625570	1.29406e+06	709004	1.19673e+06	1.06919e+06	1.15641e+06	499728	491862	435099	Q9UK55	Protein Z-dependent protease inhibitor (PZ-dependent protease inhibitor) (PZI) (Serpin A10)
sp|Q9Y646|CBPQ_HUMAN	249255	164552	172105	103498	74062.2	95237.7	112725	107455	102637	135817	110718	97893.2	46507.5	16226.1	58879.2	Q9Y646	Carboxypeptidase Q (EC 3.4.17.-) (Lysosomal dipeptidase) (Plasma glutamate carboxypeptidase)
sp|O00602|FCN1_HUMAN	30200.9	32570.9	38190.5	19156.5	19097.1	16778.7	46576.7	49032.8	51680.8	27376.3	26788.7	26634.5	27268.2	26943.8	25375.4	O00602	Ficolin-1 (Collagen/fibrinogen domain-containing protein 1) (Ficolin-A) (Ficolin-alpha) (M-ficolin)
sp|O75594|PGRP1_HUMAN	38185.1	61266.3	45387.5	17751.1	28288	25941	40816	46265.6	57980.7	24888.5	24300.7	28536.5	20097.5	22080.2	44600.4	O75594	Peptidoglycan recognition protein 1 (Peptidoglycan recognition protein short) (PGRP-S)
sp|O94985|CSTN1_HUMAN	31638.1	28890.1	40376.3	27277.7	26861.4	23753.6	44452.9	43110.4	63550.7	25276	17226.2	40705.9	21751.3	20823.3	33012.3	O94985	Calsyntenin-1 (Alcadein-alpha) (Alc-alpha) (Alzheimer-related cadherin-like protein) (Non-classical cadherin XB31alpha) [Cleaved into: Soluble Alc-alpha (SAlc-alpha); CTF1-alpha (C-terminal fragment 1-alpha)]
sp|P02652|APOA2_HUMAN	1.73108e+06	1.61123e+06	1.78721e+06	806910	887062	981419	1.12485e+06	1.36282e+06	1.14681e+06	1.04085e+06	903214	929402	989774	751028	1.05098e+06	P02652	Apolipoprotein A-II (Apo-AII) (ApoA-II) (Apolipoprotein A2) [Cleaved into: Proapolipoprotein A-II (ProapoA-II); Truncated apolipoprotein A-II (Apolipoprotein A-II(1-76))]
sp|P02786|TFR1_HUMAN	58875.3	72970.9	47011.1	89339	76089.9	85727.3	209894	212606	170066	75947.3	87957.6	79621.3	81280.7	54559.7	65343.7	P02786	Transferrin receptor protein 1 (TR) (TfR) (TfR1) (Trfr) (T9) (p90) (CD antigen CD71) [Cleaved into: Transferrin receptor protein 1, serum form (sTfR)]
sp|P02787|TRFE_HUMAN	656512	420195	362967	219020	442172	273978	1.3193e+06	1.18308e+06	1.07125e+06	331189	585253	523437	394696	377218	493393	P02787	Serotransferrin (Transferrin) (Beta-1 metal-binding globulin) (Siderophilin)
sp|P05362|ICAM1_HUMAN	230129	253034	260392	266202	235053	167291	221621	214786	207955	191052	132113	214572	130189	150741	178599	P05362	Intercellular adhesion molecule 1 (ICAM-1) (Major group rhinovirus receptor) (CD antigen CD54)
sp|P11717|MPRI_HUMAN	39123	39738.2	42509.5	24522.5	23676	24401.6	42273.3	32819.5	40079.5	27009.1	27336.9	23706.3	17372.4	17097.5	14883.1	P11717	Cation-independent mannose-6-phosphate receptor (CI Man-6-P receptor) (CI-MPR) (M6PR) (300 kDa mannose 6-phosphate receptor) (MPR 300) (Insulin-like growth factor 2 receptor) (Insulin-like growth factor II receptor) (IGF-II receptor) (M6P/IGF2 receptor) (M6P/IGF2R) (CD antigen CD222)
sp|P19320|VCAM1_HUMAN	673309	554869	683089	501470	466192	571819	676732	558454	538640	454658	294244	368738	432863	521881	593002	P19320	Vascular cell adhesion protein 1 (V-CAM 1) (VCAM-1) (INCAM-100) (CD antigen CD106)
sp|P63261|ACTG_HUMAN	1.06439e+06	1.09836e+06	1.23041e+06	832954	716167	661523	1.13994e+06	1.19352e+06	1.40922e+06	770829	930911	885167	762272	931778	858782	P63261	Actin, cytoplasmic 2 (Gamma-actin) [Cleaved into: Actin, cytoplasmic 2, N-terminally processed]
sp|P67936|TPM4_HUMAN	92462.2	66293.3	76735.2	48496.1	57528.7	15978.4	118196	123727	78785	45886.7	16986.8	41400.8	57329.8	41350.4	56553.7	P67936	Tropomyosin alpha-4 chain (TM30p1) (Tropomyosin-4)
sp|P98160|PGBM_HUMAN	115978	142806	190733	215698	73284.2	119631	173508	153723	114419	36675.8	40373.4	83163.4	91340.2	103932	100462	P98160	Basement membrane-specific heparan sulfate proteoglycan core protein (HSPG) (Perlecan) (PLC) [Cleaved into: Endorepellin; LG3 peptide]
sp|Q08380|LG3BP_HUMAN	82521.5	83690.6	94260.8	66316.3	51530.4	36460.1	88222.3	82861.5	86029.1	27694	24833.4	52348.4	51619.2	46784.5	17639.9	Q08380	Galectin-3-binding protein (Basement membrane autoantigen p105) (Lectin galactoside-binding soluble 3-binding protein) (Mac-2-binding protein) (MAC2BP) (Mac-2 BP) (Tumor-associated antigen 90K)
sp|Q10588|BST1_HUMAN	9128.3	32764.8	34874.9	38940.1	45334.9	49168.9	32728	32091	35146.5	23606	10779.1	4212.24	2779.15	17645.2	5332.38	Q10588	ADP-ribosyl cyclase/cyclic ADP-ribose hydrolase 2 (EC 3.2.2.6) (ADP-ribosyl cyclase 2) (Bone marrow stromal antigen 1) (BST-1) (Cyclic ADP-ribose hydrolase 2) (cADPr hydrolase 2) (CD antigen CD157)
sp|Q5T1H1|EYS_HUMAN	4.057e+06	4.21199e+06	4.22568e+06	3.16625e+06	2.65989e+06	3.03254e+06	6.49289e+06	6.36445e+06	6.50557e+06	1.21642e+06	1.60809e+06	1.38941e+06	1.06713e+06	1.12352e+06	1.06523e+06	Q5T1H1	Protein eyes shut homolog (Epidermal growth factor-like protein 10) (EGF-like protein 10) (Epidermal growth factor-like protein 11) (EGF-like protein 11) (Protein spacemaker homolog)
sp|Q96DP5|FMT_HUMAN	93851.5	132046	114354	83280.4	54102.6	43978.8	128436	128401	133453	62499.5	46668.9	63149.5	39935.3	61969.6	39286.7	Q96DP5	Methionyl-tRNA formyltransferase, mitochondrial (MtFMT) (EC 2.1.2.9)
sp|Q9BYX7|ACTBM_HUMAN	938862	945276	1.00144e+06	629774	562232	513321	987253	878040	1.12933e+06	633008	701572	703745	745508	882781	787170	Q9BYX7	Putative beta-actin-like protein 3 (Kappa-actin) (POTE ankyrin domain family member K)
sp|Q9Y5Y7|LYVE1_HUMAN	605329	596995	627460	425097	538527	494229	514465	573122	591659	483082	413044	409349	462438	304363	458978	Q9Y5Y7	Lymphatic vessel endothelial hyaluronic acid receptor 1 (LYVE-1) (Cell surface retention sequence-binding protein 1) (CRSBP-1) (Extracellular link domain-containing protein 1) (Hyaluronic acid receptor)
sp|P00739|HPTR_HUMAN	2.676e+06	3.09311e+06	2.81515e+06	1.66679e+06	1.70452e+06	1.67955e+06	3.62862e+06	3.96923e+06	4.06069e+06	8.33104e+06	8.35472e+06	8.39254e+06	1.49201e+07	1.3312e+07	1.50633e+07	P00739	Haptoglobin-related protein
sp|P01871|IGHM_HUMAN	52525.3	70575.4	65839.2	53788.1	72388	68392.2	50594	34759.1	57613.5	68946.6	48051.8	60551.5	81835.7	80167.7	83998.7	P01871	Ig mu chain C region
sp|P07357|CO8A_HUMAN	7.57497e+06	7.98772e+06	8.48858e+06	6.65903e+06	6.6564e+06	6.42238e+06	8.19267e+06	8.69464e+06	7.93066e+06	9.90814e+06	8.62632e+06	9.40916e+06	1.07272e+07	9.05801e+06	1.01104e+07	P07357	Complement component C8 alpha chain (Complement component 8 subunit alpha)
sp|P08637|FCG3A_HUMAN	209151	228756	207711	190515	216913	249715	88206.6	245618	242215	265593	293855	275127	367154	365964	415914	P08637	Low affinity immunoglobulin gamma Fc region receptor III-A (CD16a antigen) (Fc-gamma RIII-alpha) (Fc-gamma RIII) (Fc-gamma RIIIa) (FcRIII) (FcRIIIa) (FcR-10) (IgG Fc receptor III-2) (CD antigen CD16a)
sp|P0DJI9|SAA2_HUMAN	149532	108903	71799.9	107104	185843	204468	184124	142468	265805	251758	206079	208621	333338	184321	356441	P0DJI9	Serum amyloid A-2 protein (SAA2)
sp|P11226|MBL2_HUMAN	551196	502261	419252	279597	432287	367597	489176	776781	388314	511125	306864	618524	1.44219e+06	845491	1.12127e+06	P11226	Mannose-binding protein C (MBP-C) (Collectin-1) (MBP1) (Mannan-binding protein) (Mannose-binding lectin)
sp|Q13201|MMRN1_HUMAN	3430	12419.1	2755.38	4680.01	2040.5	1663.62	8034.67	15683.2	4085.09	5970.58	4431.21	3962.46	19264.6	19504.6	18908.5	Q13201	Multimerin-1 (EMILIN-4) (Elastin microfibril interface located protein 4) (Elastin microfibril interfacer 4) (Endothelial cell multimerin) [Cleaved into: Platelet glycoprotein Ia*; 155 kDa platelet multimerin (p-155) (p155)]
sp|Q7Z7M0|MEGF8_HUMAN	231259	181633	326049	78906.7	110713	103932	108816	151252	115549	177419	51611.7	185261	283033	291746	235261	Q7Z7M0	Multiple epidermal growth factor-like domains protein 8 (Multiple EGF-like domains protein 8) (Epidermal growth factor-like protein 4) (EGF-like protein 4)
sp|Q9NUX5|POTE1_HUMAN	26628.9	16501.9	25501.3	8531.71	14794	20418.7	32627.2	5371.66	1879.83	15276.8	3872.32	3877.64	64341.2	55876.3	71137.8	Q9NUX5	Protection of telomeres protein 1 (hPot1) (POT1-like telomere end-binding protein)
sp|P01008|ANT3_HUMAN	1.84652e+07	1.84087e+07	1.91883e+07	1.0166e+07	1.53647e+07	1.4605e+07	1.72156e+07	1.63728e+07	1.8828e+07	2.5577e+07	2.35628e+07	2.44481e+07	1.44557e+07	1.07323e+07	1.42016e+07	P01008	Antithrombin-III (ATIII) (Serpin C1)
sp|P01834|IGKC_HUMAN	57585.9	79367.4	72037.2	34856.2	17813.2	21452.4	30384.1	80229.9	64795.2	99721.5	53089	50005.3	22132.2	35484.3	12222.7	P01834	Ig kappa chain C region
sp|P02743|SAMP_HUMAN	300649	311636	287015	146654	276451	293947	157718	116916	190900	366289	330355	343425	181981	263227	218517	P02743	Serum amyloid P-component (SAP) (9.5S alpha-1-glycoprotein) [Cleaved into: Serum amyloid P-component(1-203)]
sp|P02763|A1AG1_HUMAN	5017.23	5944.77	7902.93	625.218	5921.39	311.246	3193	4069.58	8025.33	26486	16056.1	24981.3	4161.43	4288.37	3912.89	P02763	Alpha-1-acid glycoprotein 1 (AGP 1) (Orosomucoid-1) (OMD 1)
sp|P68871|HBB_HUMAN	319822	324175	308259	200469	406337	268461	365251	463939	375512	824510	792269	888261	211784	251522	202189	P68871	Hemoglobin subunit beta (Beta-globin) (Hemoglobin beta chain) [Cleaved into: LVV-hemorphin-7; Spinorphin]
sp|P69905|HBA_HUMAN	228796	244733	167937	101946	145041	179305	237053	216610	230669	423980	506006	467336	115009	152185	199512	P69905	Hemoglobin subunit alpha (Alpha-globin) (Hemoglobin alpha chain)
sp|Q58FF8|H90B2_HUMAN	6738.16	9026.26	8899.24	1304.86	5012.33	2592.32	6668.81	10144.9	16314.3	94406.9	7387.16	87134	2318.87	8360.11	4062.49	Q58FF8	Putative heat shock protein HSP 90-beta 2 (Heat shock protein 90-beta b) (Heat shock protein 90Bb)
sp|A1L4H1|SRCRL_HUMAN	16869.9	39905.2	15403.2	17948	32302.5	14053.1	17665.8	31135.5	31027	37874.9	9142.54	32962.6	46068.2	78571.5	33368.6	A1L4H1	Soluble scavenger receptor cysteine-rich domain-containing protein SSC5D (Soluble scavenger protein with 5 SRCR domains) (SSc5D)
sp|O00533|NCHL1_HUMAN	37634.4	31404.6	12365.4	14135.4	22376.7	4414.73	13235	27861.5	33360.4	5690.11	3629.45	3963.64	75582.7	3543.89	73598.4	O00533	Neural cell adhesion molecule L1-like protein (Close homolog of L1) [Cleaved into: Processed neural cell adhesion molecule L1-like protein]
sp|O43805|SSNA1_HUMAN	2866.76	100092	92629.6	49714.1	59515.2	33175.7	19727.8	90430.2	87934.7	101584	69430.9	71571.9	135268	115325	160974	O43805	Sjoegren syndrome nuclear autoantigen 1 (Nuclear autoantigen of 14 kDa)
sp|O75019|LIRA1_HUMAN	54937.8	46860.7	49771.9	44516.5	42194.3	47755	4966.79	57698.3	58698.5	41949.5	48882.5	46819	85655.7	54457.6	95189.4	O75019	Leukocyte immunoglobulin-like receptor subfamily A member 1 (CD85 antigen-like family member I) (Leukocyte immunoglobulin-like receptor 6) (LIR-6) (CD antigen CD85i)
sp|O76054|S14L2_HUMAN	0	4136.88	168.139	647.087	319.18	309.213	316.515	197.293	333.175	0	1031.7	409.196	371.842	766.716	408.853	O76054	SEC14-like protein 2 (Alpha-tocopherol-associated protein) (TAP) (hTAP) (Squalene transfer protein) (Supernatant protein factor) (SPF)
sp|O95445|APOM_HUMAN	4.44783e+06	4.42926e+06	4.41058e+06	4.9611e+06	4.23058e+06	4.27583e+06	4.60407e+06	4.70916e+06	4.92141e+06	3.24651e+06	3.64337e+06	3.60969e+06	4.23347e+06	4.91191e+06	4.55649e+06	O95445	Apolipoprotein M (Apo-M) (ApoM) (Protein G3a)
sp|O95479|G6PE_HUMAN	4126.59	1253.36	5830.99	9022.77	7225.14	1844.67	21053.1	29127.4	3014.65	15189.8	5224.67	15486.4	4037.61	8787.89	10228.5	O95479	GDH/6PGL endoplasmic bifunctional protein [Includes: Glucose 1-dehydrogenase (EC 1.1.1.47) (Hexose-6-phosphate dehydrogenase); 6-phosphogluconolactonase (6PGL) (EC 3.1.1.31)]
sp|P00488|F13A_HUMAN	1.14128e+06	1.25364e+06	1.07967e+06	1.34935e+06	1.21367e+06	961613	876444	943063	960201	1.46443e+06	1.28221e+06	1.38163e+06	1.09589e+06	1.13575e+06	977543	P00488	Coagulation factor XIII A chain (Coagulation factor XIIIa) (EC 2.3.2.13) (Protein-glutamine gamma-glutamyltransferase A chain) (Transglutaminase A chain)
sp|P00734|THRB_HUMAN	1.03277e+08	1.06768e+08	1.06515e+08	1.00579e+08	9.72338e+07	9.22035e+07	9.50787e+07	9.87031e+07	9.52375e+07	9.50724e+07	9.05276e+07	9.63565e+07	9.44167e+07	9.95016e+07	9.70355e+07	P00734	Prothrombin (EC 3.4.21.5) (Coagulation factor II) [Cleaved into: Activation peptide fragment 1; Activation peptide fragment 2; Thrombin light chain; Thrombin heavy chain]
sp|P00740|FA9_HUMAN	2.61354e+06	2.52838e+06	2.39782e+06	2.75996e+06	2.35801e+06	2.54119e+06	2.58847e+06	2.64634e+06	2.20272e+06	2.14479e+06	2.6363e+06	2.345e+06	2.33705e+06	2.51552e+06	1.86174e+06	P00740	Coagulation factor IX (EC 3.4.21.22) (Christmas factor) (Plasma thromboplastin component) (PTC) [Cleaved into: Coagulation factor IXa light chain; Coagulation factor IXa heavy chain]
sp|P00742|FA10_HUMAN	5.4091e+06	5.18849e+06	5.01682e+06	4.63865e+06	4.13914e+06	4.51553e+06	5.29071e+06	5.15124e+06	4.72331e+06	4.18104e+06	4.73264e+06	4.51268e+06	4.6886e+06	5.20635e+06	4.32486e+06	P00742	Coagulation factor X (EC 3.4.21.6) (Stuart factor) (Stuart-Prower factor) [Cleaved into: Factor X light chain; Factor X heavy chain; Activated factor Xa heavy chain]
sp|P00747|PLMN_HUMAN	3.98516e+07	3.828e+07	3.82272e+07	3.82621e+07	3.78986e+07	3.91218e+07	3.62348e+07	3.78697e+07	3.74249e+07	3.5724e+07	3.89563e+07	3.66703e+07	3.24312e+07	3.02362e+07	3.21993e+07	P00747	Plasminogen (EC 3.4.21.7) [Cleaved into: Plasmin heavy chain A; Activation peptide; Angiostatin; Plasmin heavy chain A, short form; Plasmin light chain B]
sp|P00751|CFAB_HUMAN	7.82427e+07	7.745e+07	7.61494e+07	6.52912e+07	5.91578e+07	6.30142e+07	8.98547e+07	9.17873e+07	8.1793e+07	5.59082e+07	6.54468e+07	6.01791e+07	8.44794e+07	8.32164e+07	8.03188e+07	P00751	Complement factor B (EC 3.4.21.47) (C3/C5 convertase) (Glycine-rich beta glycoprotein) (GBG) (PBF2) (Properdin factor B) [Cleaved into: Complement factor B Ba fragment; Complement factor B Bb fragment]
sp|P01024|CO3_HUMAN	1.36691e+06	1.15821e+06	1.43814e+06	1.09866e+06	944584	1.16479e+06	1.21788e+06	1.22695e+06	1.17352e+06	1.13835e+06	1.04821e+06	874044	1.33473e+06	1.11116e+06	1.31709e+06	P01024	Complement C3 (C3 and PZP-like alpha-2-macroglobulin domain-containing protein 1) [Cleaved into: Complement C3 beta chain; C3-beta-c (C3bc); Complement C3 alpha chain; C3a anaphylatoxin; Acylation stimulating protein (ASP) (C3adesArg); Complement C3b alpha' chain; Complement C3c alpha' chain fragment 1; Complement C3dg fragment; Complement C3g fragment; Complement C3d fragment; Complement C3f fra…
sp|P01042|KNG1_HUMAN	1.00029e+08	9.91128e+07	1.00191e+08	9.77402e+07	9.35907e+07	9.77415e+07	1.03913e+08	1.03594e+08	1.0613e+08	1.00881e+08	1.14187e+08	1.04075e+08	7.8985e+07	8.27333e+07	8.3844e+07	P01042	Kininogen-1 (Alpha-2-thiol proteinase inhibitor) (Fitzgerald factor) (High molecular weight kininogen) (HMWK) (Williams-Fitzgerald-Flaujeac factor) [Cleaved into: Kininogen-1 heavy chain; T-kinin (Ile-Ser-Bradykinin); Bradykinin (Kallidin I); Lysyl-bradykinin (Kallidin II); Kininogen-1 light chain; Low molecular weight growth-promoting factor]
sp|P01591|IGJ_HUMAN	14984.7	1012.43	23270	14449.7	14153.5	1133.92	2188.73	13311.6	19194.8	1736.95	8254.22	8089.9	19116.9	27777.3	32834	P01591	Immunoglobulin J chain (Joining chain of multimeric IgA and IgM)
sp|P01776|HV315_HUMAN	56453.2	5591.15	57506.7	4573.06	7866.08	8518.55	16204.3	11793.7	13521.7	11467.9	3920.71	16062.2	8565.33	9106.13	96759.3	P01776	Merged into P01764.
sp|P01777|HV316_HUMAN	144741	28677.7	152411	103207	59590.7	47256.1	23837.3	25882.9	133111	6848.89	121374	116385	7169.82	87296.8	89843.5	P01777	Merged into P01764.
sp|P01857|IGHG1_HUMAN	14543.4	38057	64855.2	24543	31231.9	20398.5	13453.4	12067.1	7828.58	16405.6	7970.15	170715	53966.6	14398.9	26145	P01857	Ig gamma-1 chain C region
sp|P01859|IGHG2_HUMAN	18513.5	10095.5	45220.9	28703.5	8873.16	9041.45	114909	45046.7	9770.1	21876.6	16224.4	24025.2	16744.5	15979.8	7129.03	P01859	Ig gamma-2 chain C region
sp|P01876|IGHA1_HUMAN	278927	401923	512747	114427	200143	219070	501513	229471	485864	269285	277127	383435	235855	479029	542205	P01876	Ig alpha-1 chain C region
sp|P02675|FIBB_HUMAN	8.49426e+06	7.01912e+06	7.28533e+06	8.25319e+06	8.93674e+06	9.88459e+06	7.81793e+06	7.81868e+06	7.51422e+06	8.88285e+06	1.07325e+07	9.94318e+06	8.31173e+06	8.19934e+06	7.54532e+06	P02675	Fibrinogen beta chain [Cleaved into: Fibrinopeptide B; Fibrinogen beta chain]
sp|P02741|CRP_HUMAN	175892	156135	181367	139831	114965	125839	302810	77033.3	213675	127407	83947.9	6646.66	332746	3970.78	313896	P02741	C-reactive protein [Cleaved into: C-reactive protein(1-205)]
sp|P02768|ALBU_HUMAN	371871	265292	286689	256667	175481	133739	383397	309121	170964	265715	195371	285679	231319	188488	270807	P02768	Serum albumin
sp|P03950|ANGI_HUMAN	209527	274176	222735	264230	273817	155114	277294	256510	252011	329824	157845	294166	259859	90177.4	255734	P03950	Angiogenin (EC 3.1.27.-) (Ribonuclease 5) (RNase 5)
sp|P03951|FA11_HUMAN	2.57848e+06	2.70102e+06	2.69207e+06	2.61227e+06	2.35158e+06	2.43813e+06	2.63064e+06	2.59581e+06	2.40568e+06	2.65714e+06	2.58045e+06	2.81725e+06	1.94673e+06	2.35386e+06	2.11658e+06	P03951	Coagulation factor XI (FXI) (EC 3.4.21.27) (Plasma thromboplastin antecedent) (PTA) [Cleaved into: Coagulation factor XIa heavy chain; Coagulation factor XIa light chain]
sp|P03952|KLKB1_HUMAN	1.8574e+07	1.86561e+07	1.83866e+07	1.68841e+07	1.67719e+07	1.71917e+07	1.61384e+07	1.5748e+07	1.71271e+07	1.65147e+07	1.81169e+07	1.7195e+07	1.28062e+07	1.15953e+07	1.2916e+07	P03952	Plasma kallikrein (EC 3.4.21.34) (Fletcher factor) (Kininogenin) (Plasma prekallikrein) (PKK) [Cleaved into: Plasma kallikrein heavy chain; Plasma kallikrein light chain]
sp|P03973|SLPI_HUMAN	39997.8	38250.2	4274.16	3518.19	18271.7	22898.1	51013.5	10167.8	30553.5	14363.7	16889.7	3328.81	55491.1	68113.4	53650.2	P03973	Antileukoproteinase (ALP) (BLPI) (HUSI-1) (Mucus proteinase inhibitor) (MPI) (Protease inhibitor WAP4) (Secretory leukocyte protease inhibitor) (Seminal proteinase inhibitor) (WAP four-disulfide core domain protein 4)
sp|P04004|VTNC_HUMAN	9.85329e+07	9.70548e+07	9.20789e+07	9.05407e+07	8.34596e+07	8.75535e+07	9.06492e+07	8.86238e+07	1.00432e+08	8.29642e+07	9.49652e+07	8.76114e+07	1.06756e+08	1.03028e+08	1.11302e+08	P04004	Vitronectin (VN) (S-protein) (Serum-spreading factor) (V75) [Cleaved into: Vitronectin V65 subunit; Vitronectin V10 subunit; Somatomedin-B]
sp|P04075|ALDOA_HUMAN	2445.31	6240.11	16905	20807.2	17725.8	21794	13389.8	27439.1	24759.8	15305.4	9103.81	17171.2	38028.6	15449.2	14954.4	P04075	Fructose-bisphosphate aldolase A (EC 4.1.2.13) (Lung cancer antigen NY-LU-1) (Muscle-type aldolase)
sp|P04217|A1BG_HUMAN	1.00885e+08	1.00639e+08	1.02083e+08	1.17539e+08	1.10535e+08	1.11964e+08	1.24992e+08	1.21365e+08	1.25312e+08	1.01053e+08	1.03304e+08	1.01966e+08	1.22733e+08	1.25707e+08	1.24585e+08	P04217	Alpha-1B-glycoprotein (Alpha-1-B glycoprotein)
sp|P04220|MUCB_HUMAN	57042.5	39780.5	7675.29	63205.3	29435.4	3570.79	120881	34245.5	121966	1542.58	4908.68	29217	149818	22033.8	265156	P04220	Ig mu heavy chain disease protein (BOT)
sp|P04275|VWF_HUMAN	1.92977e+06	1.88172e+06	1.87844e+06	2.10211e+06	1.94373e+06	1.81447e+06	2.00175e+06	1.91845e+06	2.0752e+06	1.49399e+06	1.51047e+06	1.81613e+06	1.29004e+06	1.7234e+06	1.41036e+06	P04275	von Willebrand factor (vWF) [Cleaved into: von Willebrand antigen 2 (von Willebrand antigen II)]
sp|P04406|G3P_HUMAN	55546.9	50544.8	42731.5	74261.7	28434.9	47975.1	64224.3	77003.5	59180.4	71240.1	31955.5	29259.3	60831.8	82598.4	28551	P04406	Glyceraldehyde-3-phosphate dehydrogenase (GAPDH) (EC 1.2.1.12) (Peptidyl-cysteine S-nitrosylase GAPDH) (EC 2.6.99.-)
sp|P05062|ALDOB_HUMAN	33196.2	30480	64121.2	67237.8	79718	58270.7	58350.6	20112.8	108932	63959.4	54701.8	63255.4	69498.5	29592.9	23768	P05062	Fructose-bisphosphate aldolase B (EC 4.1.2.13) (Liver-type aldolase)
sp|P05067|A4_HUMAN	4399.71	17550.7	25597.9	79578.7	28056.2	2111.75	4525.11	12304.6	9153.76	31800	17894.8	1365.31	14765.8	3524.99	11451.8	P05067	Amyloid beta A4 protein (ABPP) (APPI) (APP) (Alzheimer disease amyloid protein) (Amyloid precursor protein) (Beta-amyloid precursor protein) (Cerebral vascular amyloid peptide) (CVAP) (PreA4) (Protease nexin-II) (PN-II) [Cleaved into: N-APP; Soluble APP-alpha (S-APP-alpha); Soluble APP-beta (S-APP-beta); C99; Beta-amyloid protein 42 (Beta-APP42); Beta-amyloid protein 40 (Beta-APP40); C83; P3(42);…
sp|P05090|APOD_HUMAN	9036.36	20936.4	10075.8	10673.4	24027	9402.83	3493.08	10295.2	19695.6	13864.4	18097	4695.29	21767.8	18823.2	34354.7	P05090	Apolipoprotein D (Apo-D) (ApoD)
sp|P05109|S10A8_HUMAN	226743	4128.92	86238.3	154774	113390	102605	269082	265308	244118	105914	244528	79098.6	133668	167487	280774	P05109	Protein S100-A8 (Calgranulin-A) (Calprotectin L1L subunit) (Cystic fibrosis antigen) (CFAG) (Leukocyte L1 complex light chain) (Migration inhibitory factor-related protein 8) (MRP-8) (p8) (S100 calcium-binding protein A8) (Urinary stone protein band A) [Cleaved into: Protein S100-A8, N-terminally processed]
sp|P05156|CFAI_HUMAN	2.04627e+07	2.05398e+07	2.05924e+07	2.32549e+07	2.06741e+07	2.16225e+07	2.43001e+07	2.31796e+07	2.14253e+07	2.0337e+07	2.242e+07	2.1064e+07	2.53293e+07	2.84127e+07	2.54419e+07	P05156	Complement factor I (EC 3.4.21.45) (C3B/C4B inactivator) [Cleaved into: Complement factor I heavy chain; Complement factor I light chain]
sp|P05452|TETN_HUMAN	3.18337e+06	3.07567e+06	2.86726e+06	2.98306e+06	3.01417e+06	2.81646e+06	2.12367e+06	2.08166e+06	2.2179e+06	2.66859e+06	2.51199e+06	2.55782e+06	2.67836e+06	2.05858e+06	2.02379e+06	P05452	Tetranectin (TN) (C-type lectin domain family 3 member B) (Plasminogen kringle 4-binding protein)
sp|P05543|THBG_HUMAN	17080.2	38231.7	26589	24114.1	17032.1	27311.1	34331.2	34449.1	14627.5	53818.9	10706.6	18475.4	179479	12938.3	6688.8	P05543	Thyroxine-binding globulin (Serpin A7) (T4-binding globulin)
sp|P06702|S10A9_HUMAN	147647	132010	136034	176662	182264	80860.1	135919	29773.5	36338.8	135563	142277	141834	93637.8	54986.7	208297	P06702	Protein S100-A9 (Calgranulin-B) (Calprotectin L1H subunit) (Leukocyte L1 complex heavy chain) (Migration inhibitory factor-related protein 14) (MRP-14) (p14) (S100 calcium-binding protein A9)
sp|P06733|ENOA_HUMAN	202077	126208	188509	59612.7	215754	137084	142815	113598	73443.4	219646	128090	197806	55412.5	123471	228968	P06733	Alpha-enolase (EC 4.2.1.11) (2-phospho-D-glycerate hydro-lyase) (C-myc promoter-binding protein) (Enolase 1) (MBP-1) (MPB-1) (Non-neural enolase) (NNE) (Phosphopyruvate hydratase) (Plasminogen-binding protein)
sp|P07225|PROS_HUMAN	1.02383e+07	9.58449e+06	9.55077e+06	9.35536e+06	8.4064e+06	8.57353e+06	8.18278e+06	8.65073e+06	7.91246e+06	8.26307e+06	9.4388e+06	9.35344e+06	9.4233e+06	1.00268e+07	9.11716e+06	P07225	Vitamin K-dependent protein S
sp|P07358|CO8B_HUMAN	8.54484e+06	7.89186e+06	7.79794e+06	6.36425e+06	7.33356e+06	8.10653e+06	7.81261e+06	7.59368e+06	7.79578e+06	7.45867e+06	8.1817e+06	8.07443e+06	9.05506e+06	8.54834e+06	8.61342e+06	P07358	Complement component C8 beta chain (Complement component 8 subunit beta)
sp|P07911|UROM_HUMAN	58522.4	85948.6	78316.4	85841.7	70459.7	85918.5	20447.4	66269.8	73608.8	49542.3	3312.98	119358	187266	209537	199488	P07911	Uromodulin (Tamm-Horsfall urinary glycoprotein) (THP) [Cleaved into: Uromodulin, secreted form]
sp|P07942|LAMB1_HUMAN	15257.6	10795.6	3017.52	3562.53	49343.7	59722.6	11153.9	9358.29	6086.59	2976.11	21010.3	21110.7	5206.88	3219.77	9341.03	P07942	Laminin subunit beta-1 (Laminin B1 chain) (Laminin-1 subunit beta) (Laminin-10 subunit beta) (Laminin-12 subunit beta) (Laminin-2 subunit beta) (Laminin-6 subunit beta) (Laminin-8 subunit beta)
sp|P07996|TSP1_HUMAN	1.86864e+06	2.07648e+06	2.22932e+06	2.76251e+06	2.44966e+06	2.2037e+06	2.30659e+06	2.36054e+06	2.23601e+06	2.27302e+06	1.93071e+06	2.15422e+06	2.98583e+06	2.85218e+06	2.80965e+06	P07996	Thrombospondin-1
sp|P08253|MMP2_HUMAN	101154	122432	71386.8	72742.2	53767.6	71179.6	207882	57992.1	50284.3	78338	319716	59795.8	62591.1	35506.9	39260.5	P08253	72 kDa type IV collagenase (EC 3.4.24.24) (72 kDa gelatinase) (Gelatinase A) (Matrix metalloproteinase-2) (MMP-2) (TBE-1) [Cleaved into: PEX]
sp|P08294|SODE_HUMAN	26611.1	2811.55	32628.9	69293.7	58768.9	56231.6	4108.5	41471.6	54813.1	46326.3	48772	43831.6	11734.1	10744.9	8705.81	P08294	Extracellular superoxide dismutase [Cu-Zn] (EC-SOD) (EC 1.15.1.1)
sp|P08567|PLEK_HUMAN	4295.21	4084.68	2297.38	296.25	3571.88	1723.47	9654.36	6593.64	10670.5	4573.75	3861.99	2991.11	636.128	7961.21	5163.79	P08567	Pleckstrin (Platelet 47 kDa protein) (p47)
sp|P08833|IBP1_HUMAN	3575.88	16845.5	16047.7	1882.45	17463.1	21562.1	59142.6	44728.7	39706.3	25521.6	29027	3419.77	29677	2478.44	37660.7	P08833	Insulin-like growth factor-binding protein 1 (IBP-1) (IGF-binding protein 1) (IGFBP-1) (Placental protein 12) (PP12)
sp|P09486|SPRC_HUMAN	111401	70096.2	53494.4	104889	41596.6	57723.3	46964.1	54412.3	90009.1	50118.3	35426.6	70915.8	60217.2	50601	96628.9	P09486	SPARC (Basement-membrane protein 40) (BM-40) (Osteonectin) (ON) (Secreted protein acidic and rich in cysteine)
sp|P09871|C1S_HUMAN	2.33369e+07	2.32753e+07	2.36047e+07	2.11979e+07	1.87424e+07	1.8398e+07	2.59542e+07	2.42488e+07	2.27701e+07	1.98915e+07	1.96645e+07	1.96856e+07	1.87538e+07	2.15623e+07	1.84127e+07	P09871	Complement C1s subcomponent (EC 3.4.21.42) (C1 esterase) (Complement component 1 subcomponent s) [Cleaved into: Complement C1s subcomponent heavy chain; Complement C1s subcomponent light chain]
sp|P0C0L4|CO4A_HUMAN	1.04774e+08	1.03454e+08	1.03887e+08	7.80401e+07	9.47101e+07	9.32263e+07	9.02024e+07	8.87225e+07	9.69709e+07	9.3649e+07	9.1031e+07	9.3241e+07	1.22098e+08	1.04749e+08	1.21035e+08	P0C0L4	Complement C4-A (Acidic complement C4) (C3 and PZP-like alpha-2-macroglobulin domain-containing protein 2) [Cleaved into: Complement C4 beta chain; Complement C4-A alpha chain; C4a anaphylatoxin; C4b-A; C4d-A; Complement C4 gamma chain]
sp|P0CG05|LAC2_HUMAN	812.952	1672.05	1831.42	380.32	1042.22	359.045	1099.71	897.333	1782.65	2402.84	1896.86	699.121	1671.14	646.708	1521.47	P0CG05	Ig lambda-2 chain C regions
sp|P0DJI8|SAA1_HUMAN	32237.3	39837.5	97544.1	29388.7	93547	89605.4	137350	95783.5	305439	122150	117003	57663.3	150495	126731	164988	P0DJI8	Serum amyloid A-1 protein (SAA) [Cleaved into: Amyloid protein A (Amyloid fibril protein AA); Serum amyloid protein A(2-104); Serum amyloid protein A(3-104); Serum amyloid protein A(2-103); Serum amyloid protein A(2-102); Serum amyloid protein A(4-101)]
sp|P11021|GRP78_HUMAN	84380.8	17152.3	67893.6	39261.5	25135.1	42572.6	16308.1	30146.2	95448.4	56994.3	24735.8	51055.7	55410	14929.6	56589.3	P11021	78 kDa glucose-regulated protein (GRP-78) (Endoplasmic reticulum lumenal Ca(2+)-binding protein grp78) (Heat shock 70 kDa protein 5) (Immunoglobulin heavy chain-binding protein) (BiP)
sp|P11142|HSP7C_HUMAN	31429.4	35552.7	38551.8	35624.7	26259.9	32078	30832.2	24002.4	24679.7	59073.3	34366.3	34680.5	56343.3	23062.6	69900.4	P11142	Heat shock cognate 71 kDa protein (Heat shock 70 kDa protein 8) (Lipopolysaccharide-associated protein 1) (LAP-1) (LPS-associated protein 1)
sp|P11362|FGFR1_HUMAN	58307.8	51157.2	66848.6	36539.7	52436.8	27903.9	87302.9	40071.8	53904.4	39113.5	12693.9	36773	45117.5	55434.9	14185	P11362	Fibroblast growth factor receptor 1 (FGFR-1) (EC 2.7.10.1) (Basic fibroblast growth factor receptor 1) (BFGFR) (bFGF-R-1) (Fms-like tyrosine kinase 2) (FLT-2) (N-sam) (Proto-oncogene c-Fgr) (CD antigen CD331)
sp|P12111|CO6A3_HUMAN	221545	238133	5900.65	167354	132287	115813	369702	318298	309659	60162.8	44580.3	61291.8	97998.7	91227.5	3321.34	P12111	Collagen alpha-3(VI) chain
sp|P12821|ACE_HUMAN	73114.9	54070.9	28521.8	34055	28646.3	25562.6	14687.6	2226.07	8593.78	54980.6	16747.5	23322.3	9110.07	64570	66235.1	P12821	Angiotensin-converting enzyme (ACE) (EC 3.2.1.-) (EC 3.4.15.1) (Dipeptidyl carboxypeptidase I) (Kininase II) (CD antigen CD143) [Cleaved into: Angiotensin-converting enzyme, soluble form]
sp|P12830|CADH1_HUMAN	23506.3	16079.5	34641.3	31285.4	25139.7	16160.7	5715.31	57498.5	2034.26	18930.5	30468.4	31933.2	30231.3	12990.1	31603.9	P12830	Cadherin-1 (CAM 120/80) (Epithelial cadherin) (E-cadherin) (Uvomorulin) (CD antigen CD324) [Cleaved into: E-Cad/CTF1; E-Cad/CTF2; E-Cad/CTF3]
sp|P13473|LAMP2_HUMAN	2500.95	9397.79	34310.8	6710.17	20716.6	37881.7	19793.6	5718.53	39801	48970.3	15279.9	7115.19	9990.64	3336.3	13214	P13473	Lysosome-associated membrane glycoprotein 2 (LAMP-2) (Lysosome-associated membrane protein 2) (CD107 antigen-like family member B) (CD antigen CD107b)
sp|P13645|K1C10_HUMAN	87528.6	45431.7	3379.7	2631.02	47801.1	1720.76	5953.92	56900.1	6338.59	5459.04	42067.7	38143.5	25504.5	4330.67	8959.62	P13645	Keratin, type I cytoskeletal 10 (Cytokeratin-10) (CK-10) (Keratin-10) (K10)
sp|P13671|CO6_HUMAN	2.60606e+07	2.63839e+07	2.70333e+07	2.29793e+07	2.28489e+07	2.16919e+07	2.87341e+07	2.87005e+07	2.68426e+07	2.10076e+07	1.9372e+07	2.02961e+07	2.75956e+07	2.91678e+07	2.78192e+07	P13671	Complement component C6
sp|P13987|CD59_HUMAN	6849.88	5059.6	5451.09	7707.84	7214.27	8967.8	3028.54	10246.4	4025.31	4407.36	6857.38	7151.72	4265.34	1053.54	14481.2	P13987	CD59 glycoprotein (1F5 antigen) (20 kDa homologous restriction factor) (HRF-20) (HRF20) (MAC-inhibitory protein) (MAC-IP) (MEM43 antigen) (Membrane attack complex inhibition factor) (MACIF) (Membrane inhibitor of reactive lysis) (MIRL) (Protectin) (CD antigen CD59)
sp|P14151|LYAM1_HUMAN	854907	132959	732857	662492	829373	911358	780973	137298	114892	651466	73525.7	199834	117116	1.23431e+06	95585	P14151	L-selectin (CD62 antigen-like family member L) (Leukocyte adhesion molecule 1) (LAM-1) (Leukocyte surface antigen Leu-8) (Leukocyte-endothelial cell adhesion molecule 1) (LECAM1) (Lymph node homing receptor) (TQ1) (gp90-MEL) (CD antigen CD62L)
sp|P14314|GLU2B_HUMAN	44567.5	53559.3	8873.12	2672.19	24041.3	17586.4	47928.3	51693.4	62086.9	61823.9	85091.5	71194.2	62377.3	21592.2	22531.1	P14314	Glucosidase 2 subunit beta (80K-H protein) (Glucosidase II subunit beta) (Protein kinase C substrate 60.1 kDa protein heavy chain) (PKCSH)
sp|P14543|NID1_HUMAN	15721.4	18359.7	15959.7	10332.4	36965.1	14159.3	14069.9	22646.9	2843.99	13008	10428	14139	7505.54	10489.1	23825.8	P14543	Nidogen-1 (NID-1) (Entactin)
sp|P14618|KPYM_HUMAN	71415.4	243473	259341	204272	187150	193969	378415	314309	87540.7	165523	196917	178078	261055	249508	243967	P14618	Pyruvate kinase PKM (EC 2.7.1.40) (Cytosolic thyroid hormone-binding protein) (CTHBP) (Opa-interacting protein 3) (OIP-3) (Pyruvate kinase 2/3) (Pyruvate kinase muscle isozyme) (Thyroid hormone-binding protein 1) (THBP1) (Tumor M2-PK) (p58)
sp|P15151|PVR_HUMAN	32729.2	4903.18	18874.3	8298.13	48751.7	50126.1	33731.6	32389.1	2447.72	40042.1	2223.5	2683.66	6695.46	4613.41	19150.7	P15151	Poliovirus receptor (Nectin-like protein 5) (NECL-5) (CD antigen CD155)
sp|P15169|CBPN_HUMAN	3.14299e+06	3.07322e+06	2.89793e+06	3.40022e+06	2.77516e+06	2.93677e+06	3.38054e+06	3.14318e+06	2.73878e+06	2.77209e+06	2.7267e+06	2.90358e+06	2.63271e+06	3.1092e+06	2.49761e+06	P15169	Carboxypeptidase N catalytic chain (CPN) (EC 3.4.17.3) (Anaphylatoxin inactivator) (Arginine carboxypeptidase) (Carboxypeptidase N polypeptide 1) (Carboxypeptidase N small subunit) (Kininase-1) (Lysine carboxypeptidase) (Plasma carboxypeptidase B) (Serum carboxypeptidase N) (SCPN)
sp|P17813|EGLN_HUMAN	18386	32166.6	31690.5	17396	20659	57523.4	30045	1043.01	2526.01	28157.6	44018.2	20870.5	16397.2	4564.78	8888.62	P17813	Endoglin (CD antigen CD105)
sp|P18136|KV313_HUMAN	3163.08	8692.39	5352.76	5745.57	21480.4	2942.77	5846.75	2921.44	11271.4	14261.8	1786.59	8493.2	10427	3528.67	7948.93	P18136	Ig kappa chain V-III region HIC
sp|P21333|FLNA_HUMAN	29139.6	22709.6	31820	20954.2	21300.4	15775.3	35593.9	39080.7	38679	24910.7	26839.3	27804.5	3022.75	8451.98	32139.4	P21333	Filamin-A (FLN-A) (Actin-binding protein 280) (ABP-280) (Alpha-filamin) (Endothelial actin-binding protein) (Filamin-1) (Non-muscle filamin)
sp|P22692|IBP4_HUMAN	118761	163891	128264	204856	103673	111537	69637.2	107478	98384.6	90496.9	103552	86759.2	135904	122741	275541	P22692	Insulin-like growth factor-binding protein 4 (IBP-4) (IGF-binding protein 4) (IGFBP-4)
sp|P23470|PTPRG_HUMAN	3871.13	2789.54	10320.8	8013.46	15593.1	2519.67	8036.56	11969.4	14274.3	14629.7	17370.1	5560.84	9422.12	3349.32	30163.2	P23470	Receptor-type tyrosine-protein phosphatase gamma (Protein-tyrosine phosphatase gamma) (R-PTP-gamma) (EC 3.1.3.48)
sp|P23528|COF1_HUMAN	136141	170003	144457	129863	100525	139178	51787.8	46859.4	198615	108895	22090.3	21260	160646	181383	61057.4	P23528	Cofilin-1 (18 kDa phosphoprotein) (p18) (Cofilin, non-muscle isoform)
sp|P24043|LAMA2_HUMAN	3929.15	15741.4	10904.7	4374.32	1750.83	21053.1	3196.28	11976.3	25977.1	8456.24	28069.8	8327.85	6728.99	38405.4	45237.5	P24043	Laminin subunit alpha-2 (Laminin M chain) (Laminin-12 subunit alpha) (Laminin-2 subunit alpha) (Laminin-4 subunit alpha) (Merosin heavy chain)
sp|P25311|ZA2G_HUMAN	159688	140817	98252.2	145192	74932.3	104275	93419	151496	94488.5	115238	81903.2	135650	181159	98139.1	86523.4	P25311	Zinc-alpha-2-glycoprotein (Zn-alpha-2-GP) (Zn-alpha-2-glycoprotein)
sp|P26038|MOES_HUMAN	21044.7	18343.4	31207.5	2440.67	7885.15	17896.3	71910.5	20033.9	25158.1	24653.4	15030.1	3131.84	36419.4	19956.8	28626.1	P26038	Moesin (Membrane-organizing extension spike protein)
sp|P26927|HGFL_HUMAN	2.51403e+06	2.36022e+06	2.46907e+06	2.39368e+06	2.44638e+06	2.75727e+06	2.09251e+06	2.14926e+06	1.89554e+06	2.297e+06	2.57627e+06	2.29191e+06	2.21392e+06	2.31882e+06	2.25031e+06	P26927	Hepatocyte growth factor-like protein (Macrophage stimulatory protein) (Macrophage-stimulating protein) (MSP) [Cleaved into: Hepatocyte growth factor-like protein alpha chain; Hepatocyte growth factor-like protein beta chain]
sp|P28799|GRN_HUMAN	38556	36140.4	8758.13	23212.1	45680.3	5555.23	29168.7	27029.6	16760.9	18440	35426.1	30799.7	22581	10130.1	3538.74	P28799	Granulins (Proepithelin) (PEPI) [Cleaved into: Acrogranin (Glycoprotein of 88 Kda) (GP88) (Glycoprotein 88) (Progranulin); Paragranulin; Granulin-1 (Granulin G); Granulin-2 (Granulin F); Granulin-3 (Granulin B); Granulin-4 (Granulin A); Granulin-5 (Granulin C); Granulin-6 (Granulin D); Granulin-7 (Granulin E)]
sp|P30101|PDIA3_HUMAN	91287.1	78726.7	54022.9	86811.5	84779.1	23158.9	175889	109681	88992	67561.1	60276.1	27284.2	34619.4	75415.9	101719	P30101	Protein disulfide-isomerase A3 (EC 5.3.4.1) (58 kDa glucose-regulated protein) (58 kDa microsomal protein) (p58) (Disulfide isomerase ER-60) (Endoplasmic reticulum resident protein 57) (ER protein 57) (ERp57) (Endoplasmic reticulum resident protein 60) (ER protein 60) (ERp60)
sp|P32942|ICAM3_HUMAN	78343.3	2831.6	70010.9	54616.2	53706.6	50128.8	71447.2	74469	4897.55	2858.72	20149.4	41221.2	71916.4	9973.16	87786.2	P32942	Intercellular adhesion molecule 3 (ICAM-3) (CDw50) (ICAM-R) (CD antigen CD50)
sp|P33908|MA1A1_HUMAN	170277	130210	42594.1	33297.7	33485.4	41380.1	277397	5786.33	258905	28940.6	32945.2	38229.9	128264	93588	3565.34	P33908	Mannosyl-oligosaccharide 1,2-alpha-mannosidase IA (EC 3.2.1.113) (Man(9)-alpha-mannosidase) (Man9-mannosidase) (Mannosidase alpha class 1A member 1) (Processing alpha-1,2-mannosidase IA) (Alpha-1,2-mannosidase IA)
sp|P35443|TSP4_HUMAN	172847	123316	120463	47457	104210	116461	121247	121670	110713	181809	93631.8	51125.9	82383.4	97301.5	58216.3	P35443	Thrombospondin-4
sp|P35555|FBN1_HUMAN	75624.2	7376.82	43644.1	31120.5	25128.2	22734.5	36791.8	34224.7	32228.6	29128.4	3226.27	25635	19061.5	27012.9	10750.7	P35555	Fibrillin-1 [Cleaved into: Asprosin]
sp|P35590|TIE1_HUMAN	5570.23	3455.51	7695.75	5346.73	13417	7755.76	11141	7747.88	16526.2	9164.85	2039.38	3648.73	8683.64	4747.91	3053.85	P35590	Tyrosine-protein kinase receptor Tie-1 (EC 2.7.10.1)
sp|P35916|VGFR3_HUMAN	93044.5	8090.63	63634.7	45925.1	35028.2	22824.8	28005.6	32680.2	100869	18181.2	26633	28324.1	25153.4	6353.86	23821.4	P35916	Vascular endothelial growth factor receptor 3 (VEGFR-3) (EC 2.7.10.1) (Fms-like tyrosine kinase 4) (FLT-4) (Tyrosine-protein kinase receptor FLT4)
sp|P36955|PEDF_HUMAN	273486	360334	272321	270676	379137	280836	527027	168673	275336	409126	258272	345665	843091	217662	696363	P36955	Pigment epithelium-derived factor (PEDF) (Cell proliferation-inducing gene 35 protein) (EPC-1) (Serpin F1)
sp|P41222|PTGDS_HUMAN	92348.4	193059	153775	58161.3	80111.6	82478.8	76802	101455	69703.5	100750	100766	89631	122157	37970.3	138687	P41222	Prostaglandin-H2 D-isomerase (EC 5.3.99.2) (Beta-trace protein) (Cerebrin-28) (Glutathione-independent PGD synthase) (Lipocalin-type prostaglandin-D synthase) (Prostaglandin-D2 synthase) (PGD2 synthase) (PGDS) (PGDS2)
sp|P43121|MUC18_HUMAN	43197	60779.4	11545.5	51366.8	62361.5	56706.1	17218.5	45334.9	29871.6	37401.6	42538	40931.4	13477.7	4034.93	29535.9	P43121	Cell surface glycoprotein MUC18 (Cell surface glycoprotein P1H12) (Melanoma cell adhesion molecule) (Melanoma-associated antigen A32) (Melanoma-associated antigen MUC18) (S-endo 1 endothelial-associated antigen) (CD antigen CD146)
sp|P49591|SYSC_HUMAN	58561	424667	357011	2996.81	491715	358503	335612	328260	310019	758151	410252	698884	210167	148201	217553	P49591	Serine--tRNA ligase, cytoplasmic (EC 6.1.1.11) (Seryl-tRNA synthetase) (SerRS) (Seryl-tRNA(Ser/Sec) synthetase)
sp|P49908|SEPP1_HUMAN	2.20273e+06	2.01407e+06	1.97264e+06	1.75911e+06	1.49519e+06	1.632e+06	2.43253e+06	2.34235e+06	2.26703e+06	1.55375e+06	1.65588e+06	1.65649e+06	2.63058e+06	2.08722e+06	2.53678e+06	P49908	Selenoprotein P (SeP)
sp|P51884|LUM_HUMAN	1.27076e+07	1.36441e+07	1.32778e+07	1.5983e+07	1.45942e+07	1.46354e+07	1.33201e+07	1.28336e+07	1.1936e+07	1.69731e+07	1.71457e+07	1.70968e+07	1.10977e+07	1.37565e+07	1.13645e+07	P51884	Lumican (Keratan sulfate proteoglycan lumican) (KSPG lumican)
sp|P52209|6PGD_HUMAN	108337	85146.1	25745.5	95554.7	38241.7	14233.6	21499.9	87828.1	99223.4	56677.6	69889.7	48647.9	153757	93242	166456	P52209	6-phosphogluconate dehydrogenase, decarboxylating (EC 1.1.1.44)
sp|P54289|CA2D1_HUMAN	82687.3	40038.2	71396.8	47080.3	42739.4	63895.5	36009.2	51216.8	40752.9	54382.5	63235.5	48494.3	44228.3	17838.3	34397.4	P54289	Voltage-dependent calcium channel subunit alpha-2/delta-1 (Voltage-gated calcium channel subunit alpha-2/delta-1) [Cleaved into: Voltage-dependent calcium channel subunit alpha-2-1; Voltage-dependent calcium channel subunit delta-1]
sp|P55103|INHBC_HUMAN	9464.45	48843.3	52328.6	35882.6	33255.1	26258	11648	39713.4	5350.48	37127.2	2121.75	37750.5	25654	22052.7	11938	P55103	Inhibin beta C chain (Activin beta-C chain)
sp|P55285|CADH6_HUMAN	3958.08	6660.8	14656.4	4712.1	15902.1	10815.1	6949.33	2987.6	18073.3	11494.9	2963.32	11033.5	5131.4	5351.98	16293	P55285	Cadherin-6 (Kidney cadherin) (K-cadherin)
sp|P55290|CAD13_HUMAN	160480	202764	210903	136602	148797	93777.6	193056	186140	168971	147903	112062	124565	73590.1	182819	175602	P55290	Cadherin-13 (Heart cadherin) (H-cadherin) (P105) (Truncated cadherin) (T-cad) (T-cadherin)
sp|P60709|ACTB_HUMAN	1.359e+06	1.40186e+06	1.55721e+06	1.15259e+06	970536	884275	1.53126e+06	1.35181e+06	1.58713e+06	1.22021e+06	1.17436e+06	1.22408e+06	1.32184e+06	1.40214e+06	1.17464e+06	P60709	Actin, cytoplasmic 1 (Beta-actin) [Cleaved into: Actin, cytoplasmic 1, N-terminally processed]
sp|P61626|LYSC_HUMAN	990257	1.19984e+06	1.03668e+06	1.32579e+06	1.28621e+06	1.29644e+06	1.19391e+06	1.19982e+06	1.24972e+06	1.17107e+06	1.1295e+06	1.09865e+06	1.13367e+06	1.12188e+06	1.05891e+06	P61626	Lysozyme C (EC 3.2.1.17) (1,4-beta-N-acetylmuramidase C)
sp|P62328|TYB4_HUMAN	17684.9	9673.58	29145.3	30667.9	36272	27319.6	58945.7	23359.3	63580.6	29026.2	68686.3	15130.7	52847	44276.7	55624.1	P62328	Thymosin beta-4 (T beta-4) (Fx) [Cleaved into: Hematopoietic system regulatory peptide (Seraspenide)]
sp|P63104|1433Z_HUMAN	84017.5	26956.7	89601.1	179654	33762.7	92782.8	127759	116591	97245.2	60006.7	132283	154763	23461.1	22306	44366.2	P63104	14-3-3 protein zeta/delta (Protein kinase C inhibitor protein 1) (KCIP-1)
sp|P78417|GSTO1_HUMAN	19885.2	12475.6	48499.1	17119.7	16899.9	10632	60440.5	63929.3	20367.3	6647.71	9726.5	39549.6	19492.2	84026.5	76347.4	P78417	Glutathione S-transferase omega-1 (GSTO-1) (EC 2.5.1.18) (Glutathione S-transferase omega 1-1) (GSTO 1-1) (Glutathione-dependent dehydroascorbate reductase) (EC 1.8.5.1) (Monomethylarsonic acid reductase) (MMA(V) reductase) (EC 1.20.4.2) (S-(Phenacyl)glutathione reductase) (SPG-R)
sp|Q01082|SPTB2_HUMAN	38011.5	37175.3	39981.9	1047.58	21523.3	21986.4	8894.88	17759.8	27147.3	68125.9	42356.6	61138.3	12304.2	2450.99	7100.02	Q01082	Spectrin beta chain, non-erythrocytic 1 (Beta-II spectrin) (Fodrin beta chain) (Spectrin, non-erythroid beta chain 1)
sp|Q01459|DIAC_HUMAN	1320.27	17835.6	12442.5	531.134	34333.9	2909.14	8179.34	4305.77	14048.2	1905	24383	30413.6	3062.51	2153.12	2467.31	Q01459	Di-N-acetylchitobiase (EC 3.2.1.-)
sp|Q02985|FHR3_HUMAN	224628	324046	283955	269108	207147	317606	300490	275575	274341	283322	321495	309790	314083	379312	331824	Q02985	Complement factor H-related protein 3 (FHR-3) (DOWN16) (H factor-like protein 3)
sp|Q07954|LRP1_HUMAN	48503.3	60107.8	116191	126670	112718	47106.2	116406	120927	124349	107821	101019	105985	142748	54916.7	51747.4	Q07954	Prolow-density lipoprotein receptor-related protein 1 (LRP-1) (Alpha-2-macroglobulin receptor) (A2MR) (Apolipoprotein E receptor) (APOER) (CD antigen CD91) [Cleaved into: Low-density lipoprotein receptor-related protein 1 85 kDa subunit (LRP-85); Low-density lipoprotein receptor-related protein 1 515 kDa subunit (LRP-515); Low-density lipoprotein receptor-related protein 1 intracellular domain (L…
sp|Q12805|FBLN3_HUMAN	1.88735e+06	1.73206e+06	1.6689e+06	1.30387e+06	1.23057e+06	1.15689e+06	1.75949e+06	1.76405e+06	1.76354e+06	1.24043e+06	1.29727e+06	1.26233e+06	1.35279e+06	1.59933e+06	1.49407e+06	Q12805	EGF-containing fibulin-like extracellular matrix protein 1 (Extracellular protein S1-5) (Fibrillin-like protein) (Fibulin-3) (FIBL-3)
sp|Q13103|SPP24_HUMAN	16284.1	85393.6	29008.5	125578	104244	108375	58712.2	127801	33363.3	84837.5	99332.5	99211.3	122489	113654	108416	Q13103	Secreted phosphoprotein 24 (Spp-24) (Secreted phosphoprotein 2)
sp|Q13231|CHIT1_HUMAN	17661.7	4905.6	67376.8	6927.55	102394	18279.2	64316.4	94355.7	57401.7	17041.1	22713.8	16753.2	35305.6	26843.8	1949.92	Q13231	Chitotriosidase-1 (EC 3.2.1.14) (Chitinase-1)
sp|Q13363|CTBP1_HUMAN	42986	5.34314e+06	5.56707e+06	3.50675e+06	5.58345e+06	3.18054e+06	3.6329e+06	3.72818e+06	4.34197e+06	6.45309e+06	2.11035e+06	4.80411e+06	2.36517e+06	1.75697e+06	2.60138e+06	Q13363	C-terminal-binding protein 1 (CtBP1) (EC 1.1.1.-)
sp|Q13790|APOF_HUMAN	141100	176757	182181	160627	148962	168897	181523	167280	39194.2	142819	180780	93740.9	243444	239352	184047	Q13790	Apolipoprotein F (Apo-F) (Lipid transfer inhibitor protein) (LTIP)
sp|Q14520|HABP2_HUMAN	7.08197e+06	6.53983e+06	6.58929e+06	5.53319e+06	5.12241e+06	5.56615e+06	7.20648e+06	7.10863e+06	6.47392e+06	4.83749e+06	5.87684e+06	5.41317e+06	4.97201e+06	5.64866e+06	4.92917e+06	Q14520	Hyaluronan-binding protein 2 (EC 3.4.21.-) (Factor VII-activating protease) (Factor seven-activating protease) (FSAP) (Hepatocyte growth factor activator-like protein) (Plasma hyaluronan-binding protein) [Cleaved into: Hyaluronan-binding protein 2 50 kDa heavy chain; Hyaluronan-binding protein 2 50 kDa heavy chain alternate form; Hyaluronan-binding protein 2 27 kDa light chain; Hyaluronan-binding…
sp|Q14574|DSC3_HUMAN	3571.56	28720.8	36794.2	5288.74	12602.3	1457.92	3319.09	4108.23	15973	2857.9	6694.64	45200	14712.4	14966.7	20237.4	Q14574	Desmocollin-3 (Cadherin family member 3) (Desmocollin-4) (HT-CP)
sp|Q14624|ITIH4_HUMAN	3.68884e+07	2.74571e+07	3.31296e+07	3.43326e+07	4.18937e+07	4.10826e+07	3.09244e+07	2.93275e+07	3.46978e+07	4.60585e+07	4.2881e+07	4.83367e+07	4.03182e+07	2.83083e+07	3.93794e+07	Q14624	Inter-alpha-trypsin inhibitor heavy chain H4 (ITI heavy chain H4) (ITI-HC4) (Inter-alpha-inhibitor heavy chain 4) (Inter-alpha-trypsin inhibitor family heavy chain-related protein) (IHRP) (Plasma kallikrein sensitive glycoprotein 120) (Gp120) (PK-120) [Cleaved into: 70 kDa inter-alpha-trypsin inhibitor heavy chain H4; 35 kDa inter-alpha-trypsin inhibitor heavy chain H4]
sp|Q15063|POSTN_HUMAN	13219.3	23109.4	11129.5	14226.7	8700.12	7695.81	22692.2	14831	10359.1	6456.5	16236.1	12760	13709.8	11050.5	11073.3	Q15063	Periostin (PN) (Osteoblast-specific factor 2) (OSF-2)
sp|Q15166|PON3_HUMAN	344105	482814	443234	537274	511444	4817.11	326332	324680	354148	802817	448039	759565	215860	5710.7	250696	Q15166	Serum paraoxonase/lactonase 3 (EC 3.1.1.2) (EC 3.1.1.81) (EC 3.1.8.1)
sp|Q15582|BGH3_HUMAN	150751	375155	120378	138566	143770	835410	81539	73203	226303	751960	667971	185796	106047	141973	213387	Q15582	Transforming growth factor-beta-induced protein ig-h3 (Beta ig-h3) (Kerato-epithelin) (RGD-containing collagen-associated protein) (RGD-CAP)
sp|Q15942|ZYX_HUMAN	25742.2	5568.47	5228.53	16634.1	16202.4	16766.7	6142.24	9347.54	12509.1	11529.4	12639	9574.1	7988.14	7256.43	19693.6	Q15942	Zyxin (Zyxin-2)
sp|Q16270|IBP7_HUMAN	27650.2	20021.8	24133.2	5903.52	39335.3	29550.9	9744.84	57181.4	20335.9	5841.85	9696.59	3312.18	20111.5	38083.3	19491.4	Q16270	Insulin-like growth factor-binding protein 7 (IBP-7) (IGF-binding protein 7) (IGFBP-7) (IGFBP-rP1) (MAC25 protein) (PGI2-stimulating factor) (Prostacyclin-stimulating factor) (Tumor-derived adhesion factor) (TAF)
sp|Q16473|TENXA_HUMAN	36988.8	49365.3	54882.3	86284.8	65671.1	54477.5	43797.5	37003.7	45415.9	74499.3	52504.7	71342	7201.37	82793.6	12270.9	Q16473	Putative tenascin-XA (TN-XA)
sp|Q16610|ECM1_HUMAN	4.68223e+06	4.74999e+06	4.80672e+06	4.65823e+06	4.54908e+06	4.48626e+06	4.07401e+06	4.04014e+06	4.15536e+06	4.36922e+06	4.50189e+06	4.42273e+06	3.52459e+06	3.261e+06	3.24579e+06	Q16610	Extracellular matrix protein 1 (Secretory component p85)
sp|Q2TV78|MST1L_HUMAN	143200	5048.77	133111	110603	95416.8	95840.6	124163	150045	134149	66618.2	70010.3	69455.9	122916	3878.77	6956.88	Q2TV78	Putative macrophage stimulating 1-like protein (Brain rescue factor 1) (BRF-1) (Hepatocyte growth factor-like protein homolog)
sp|Q5SYB0|FRPD1_HUMAN	388469	425198	440533	541212	1942.39	368784	522945	445992	438537	482.391	386506	516630	115412	144719	2658.66	Q5SYB0	FERM and PDZ domain-containing protein 1 (FERM domain-containing protein 2)
sp|Q6KC79|NIPBL_HUMAN	145996	4459	157463	7993.93	86631.2	78696.9	248002	199519	201523	4995.07	19031.1	41630.3	9971.99	6675.59	9938.96	Q6KC79	Nipped-B-like protein (Delangin) (SCC2 homolog)
sp|Q6UWN0|LYPD4_HUMAN	4234.72	5062.79	193487	137841	107353	96338.3	293644	240599	9855.22	4658.22	36671.6	53612.3	4365.1	6535.13	10831.9	Q6UWN0	Ly6/PLAUR domain-containing protein 4
sp|Q6UXB8|PI16_HUMAN	1.91249e+06	370620	1.02301e+06	269853	973413	272054	298082	525900	1.59035e+06	227258	299823	773447	238006	195453	116136	Q6UXB8	Peptidase inhibitor 16 (PI-16) (Cysteine-rich secretory protein 9) (CRISP-9) (PSP94-binding protein)
sp|Q6UY14|ATL4_HUMAN	214100	211276	178889	147964	129350	137858	182670	133452	175384	166424	150494	146829	147288	117915	161784	Q6UY14	ADAMTS-like protein 4 (ADAMTSL-4) (Thrombospondin repeat-containing protein 1)
sp|Q76LX8|ATS13_HUMAN	329470	466911	387873	299891	281240	244322	336820	235317	403819	387924	185794	197121	394380	243033	420449	Q76LX8	A disintegrin and metalloproteinase with thrombospondin motifs 13 (ADAM-TS 13) (ADAM-TS13) (ADAMTS-13) (EC 3.4.24.87) (von Willebrand factor-cleaving protease) (vWF-CP) (vWF-cleaving protease)
sp|Q7Z7G0|TARSH_HUMAN	66696.7	62495.9	5049.82	28782.2	24642.5	40577.5	61986.6	58176.5	59273.3	26460.8	24453.4	29512.1	21665.7	30561.3	18071.2	Q7Z7G0	Target of Nesh-SH3 (Tarsh) (ABI gene family member 3-binding protein) (Nesh-binding protein) (NeshBP)
sp|Q86SQ4|GP126_HUMAN	7779.8	58209.8	5339.49	12651	5522.89	5916.45	10889.7	6945.89	7953.21	9019.18	15575.4	9431.37	22131	8437.52	17624.4	Q86SQ4	G-protein coupled receptor 126 (Developmentally regulated G-protein-coupled receptor) (Vascular inducible G protein-coupled receptor)
sp|Q86TH1|ATL2_HUMAN	76564.9	54318	67217.4	48513.3	5845.19	12260.5	4820.56	92304.1	82929.6	37706.2	4117.76	6799.17	4389.37	35568.3	50633.8	Q86TH1	ADAMTS-like protein 2 (ADAMTSL-2)
sp|Q86UD1|OAF_HUMAN	151634	162985	156610	210544	180276	149796	158175	107020	186299	165597	198787	198633	112908	108384	151301	Q86UD1	Out at first protein homolog (HCV NS5A-transactivated protein 13 target protein 2)
sp|Q86UN3|R4RL2_HUMAN	30168.4	77500.9	59393.6	66293.5	6549.87	74866.5	59845.4	31187.8	58098.6	42811.2	34591.2	46249.2	21680.6	24103.2	17535.3	Q86UN3	Reticulon-4 receptor-like 2 (Nogo receptor-like 3) (Nogo-66 receptor homolog 1) (Nogo-66 receptor-related protein 2) (NgR2)
sp|Q86UX7|URP2_HUMAN	11428	32438	35006.3	56292.5	45429.9	34217.3	29593.4	31620.5	38445.5	49951.8	42057.7	3325.65	5009.73	4360.65	7610.33	Q86UX7	Fermitin family homolog 3 (Kindlin-3) (MIG2-like protein) (Unc-112-related protein 2)
sp|Q86VB7|C163A_HUMAN	200615	106443	364461	192193	236325	179633	93940.1	232871	196294	162505	188797	192871	90497.1	112676	200659	Q86VB7	Scavenger receptor cysteine-rich type 1 protein M130 (Hemoglobin scavenger receptor) (CD antigen CD163) [Cleaved into: Soluble CD163 (sCD163)]
sp|Q86YS7|C2CD5_HUMAN	59021	6181.33	29457.7	1950.22	13954.6	16010.7	29040.1	55351.5	41017.9	48810.6	5171.45	49147.5	71842.2	8722.83	3252.14	Q86YS7	C2 domain-containing protein 5 (C2 domain-containing phosphoprotein of 138 kDa)
sp|Q8IZF2|GP116_HUMAN	111175	26834.1	8100.83	16379	13731.8	13517.9	4829.8	91733.9	6061.81	12797.4	10965.3	26766.9	152122	108366	6475.48	Q8IZF2	Adhesion G protein-coupled receptor F5 (G-protein coupled receptor 116)
sp|Q8N149|LIRA2_HUMAN	50524.7	43318.7	47144.7	42455.2	6712.78	42767.1	50325.6	57300	57246.1	40805.3	44776.2	42992.2	84055.1	56062.6	89136.8	Q8N149	Leukocyte immunoglobulin-like receptor subfamily A member 2 (CD85 antigen-like family member H) (Immunoglobulin-like transcript 1) (ILT-1) (Leukocyte immunoglobulin-like receptor 7) (LIR-7) (CD antigen CD85h)
sp|Q8NBP7|PCSK9_HUMAN	103078	112734	99251.2	70840.4	69828.7	85291.6	72615.9	24937.3	87432.7	60494.9	73315.9	72027.6	62512.1	10846.7	98578.1	Q8NBP7	Proprotein convertase subtilisin/kexin type 9 (EC 3.4.21.-) (Neural apoptosis-regulated convertase 1) (NARC-1) (Proprotein convertase 9) (PC9) (Subtilisin/kexin-like protease PC9)
sp|Q8NEY8|PPHLN_HUMAN	19878.8	2975.37	129097	216287	5356.41	207003	3225.57	86427.1	20945.3	193128	219175	208544	8526.6	9602.65	5103.35	Q8NEY8	Periphilin-1 (CDC7 expression repressor) (CR) (Gastric cancer antigen Ga50)
sp|Q8WWZ8|OIT3_HUMAN	17960.6	19639.7	22490.6	1525.66	37783.9	32828.4	16653.4	13144.1	24777.5	42611.4	42717.7	39549.8	18576.5	18798	26344.8	Q8WWZ8	Oncoprotein-induced transcript 3 protein (Liver-specific zona pellucida domain-containing protein)
sp|Q8WZ75|ROBO4_HUMAN	66253.9	9125.97	62832.5	22849.2	6316.71	25151.4	9304.36	18553	63076.9	5487.07	2728.17	7670.14	10061.8	3401.74	11939.3	Q8WZ75	Roundabout homolog 4 (Magic roundabout)
sp|Q92954|PRG4_HUMAN	1.11363e+06	1.14509e+06	1.12151e+06	1.39862e+06	1.28014e+06	1.37642e+06	996129	1.09439e+06	1.11685e+06	1.44822e+06	1.23385e+06	1.35885e+06	1.17081e+06	1.13584e+06	915830	Q92954	Proteoglycan 4 (Lubricin) (Megakaryocyte-stimulating factor) (Superficial zone proteoglycan) [Cleaved into: Proteoglycan 4 C-terminal part]
sp|Q96EE4|CC126_HUMAN	34988.5	46829.9	25311.5	20281.2	26104.7	26312.2	17060.9	23032.7	33954	40435.9	30570	5818.86	29902.2	3291.27	41100.5	Q96EE4	Coiled-coil domain-containing protein 126
sp|Q96K76|UBP47_HUMAN	57687.8	63656.2	7191.2	50190.4	64213.4	55600.7	48611.2	5377.36	50657.6	22308.4	26985.6	12021.5	83559.3	7013.56	8582.53	Q96K76	Ubiquitin carboxyl-terminal hydrolase 47 (EC 3.4.19.12) (Deubiquitinating enzyme 47) (Ubiquitin thioesterase 47) (Ubiquitin-specific-processing protease 47)
sp|Q96LB3|IFT74_HUMAN	1.5474e+07	1.13433e+07	1.322e+07	1.796e+06	2.56582e+07	2.542e+07	1.12441e+07	8.37643e+06	1.5949e+07	3.22768e+07	1.93879e+07	2.59744e+07	8.14375e+06	4.75267e+06	8.00108e+06	Q96LB3	Intraflagellar transport protein 74 homolog (Capillary morphogenesis gene 1 protein) (CMG-1) (Coiled-coil domain-containing protein 2)
sp|Q99941|ATF6B_HUMAN	78422	68038.8	60704.5	66199.5	27405.8	65375.1	25180.4	59302.6	66457.9	44526.7	59342.3	9276.32	136571	122171	106473	Q99941	Cyclic AMP-dependent transcription factor ATF-6 beta (cAMP-dependent transcription factor ATF-6 beta) (Activating transcription factor 6 beta) (ATF6-beta) (Protein G13) (cAMP response element-binding protein-related protein) (Creb-rp) (cAMP-responsive element-binding protein-like 1) [Cleaved into: Processed cyclic AMP-dependent transcription factor ATF-6 beta]
sp|Q99969|RARR2_HUMAN	260674	215251	193888	166148	206418	186715	181260	202034	251654	234822	225912	217896	245222	86471.2	405689	Q99969	Retinoic acid receptor responder protein 2 (Chemerin) (RAR-responsive protein TIG2) (Tazarotene-induced gene 2 protein)
sp|Q9BWP8|COL11_HUMAN	309711	104979	284024	233725	234983	202729	227734	294852	335287	193118	184677	228958	329650	275610	257980	Q9BWP8	Collectin-11 (Collectin kidney protein 1) (CL-K1)
sp|Q9H8L6|MMRN2_HUMAN	64930	76019	73726.9	42734.5	39127.9	53917.3	73620.3	79990.1	59376.7	32415	55379.7	59840.8	36939.6	10236.1	65944.7	Q9H8L6	Multimerin-2 (EMILIN-3) (Elastin microfibril interface located protein 3) (Elastin microfibril interfacer 3) (EndoGlyx-1 p125/p140 subunit)
sp|Q9HCU0|CD248_HUMAN	37004.9	5786.13	6420.78	58708.8	9889.09	54384.7	33518.9	12811.8	12480.4	3567.17	28443.9	3531.98	52719.5	3177.78	15506.1	Q9HCU0	Endosialin (Tumor endothelial marker 1) (CD antigen CD248)
sp|Q9NPG4|PCD12_HUMAN	9726.72	6898.97	503.403	7189.16	4974.89	4864.89	4645.12	3617.25	3369.59	7207.02	4265.1	7201.28	2371.23	1316.52	3248.21	Q9NPG4	Protocadherin-12 (Vascular cadherin-2) (Vascular endothelial cadherin-2) (VE-cad-2) (VE-cadherin-2)
sp|Q9UBG0|MRC2_HUMAN	1211.39	17442.4	2266.86	10329.9	14220.5	16038.2	3458.5	2681.8	13222.7	16165.9	12639.4	17792.5	15010.9	7431.63	1407.2	Q9UBG0	C-type mannose receptor 2 (C-type lectin domain family 13 member E) (Endocytic receptor 180) (Macrophage mannose receptor 2) (Urokinase-type plasminogen activator receptor-associated protein) (UPAR-associated protein) (Urokinase receptor-associated protein) (CD antigen CD280)
sp|Q9UBP4|DKK3_HUMAN	4427.94	7871.18	8193.78	3823.02	20270.5	22521.7	16962.2	9666.96	31641	32809.9	13330.9	21145.7	20486.2	21024.3	22163.7	Q9UBP4	Dickkopf-related protein 3 (Dickkopf-3) (Dkk-3) (hDkk-3)
sp|Q9UBR2|CATZ_HUMAN	87719.4	8018.37	112106	43009.7	30273.1	38824.3	12731.3	122956	133439	34593.4	24757	34565.9	7866.88	78948.5	16729.7	Q9UBR2	Cathepsin Z (EC 3.4.18.1) (Cathepsin P) (Cathepsin X)
sp|Q9UBX1|CATF_HUMAN	9178.72	24592.7	6478.93	49426.1	408.142	43266.2	33617.6	21925.2	9271.57	12126	19625.1	53221.5	25954.9	26078.9	42119.1	Q9UBX1	Cathepsin F (CATSF) (EC 3.4.22.41)
sp|Q9UJJ9|GNPTG_HUMAN	18643.6	20117.3	25155.3	18480	7986.26	27499.4	9721.5	31560.1	8541.85	8916.66	16903.6	14020.4	44793.8	28315.8	4090.24	Q9UJJ9	N-acetylglucosamine-1-phosphotransferase subunit gamma (GlcNAc-1-phosphotransferase subunit gamma) (UDP-N-acetylglucosamine-1-phosphotransferase subunit gamma)
sp|Q9UNW1|MINP1_HUMAN	184361	421885	443120	267498	213345	384793	392758	169377	425048	278607	236159	222668	473950	372742	396803	Q9UNW1	Multiple inositol polyphosphate phosphatase 1 (EC 3.1.3.62) (2,3-bisphosphoglycerate 3-phosphatase) (2,3-BPG phosphatase) (EC 3.1.3.80) (Inositol (1,3,4,5)-tetrakisphosphate 3-phosphatase) (Ins(1,3,4,5)P(4) 3-phosphatase)
sp|Q9Y281|COF2_HUMAN	52225.8	43491.5	43683.7	32964.9	25177	37329.8	54738.5	55664.5	45921.9	25273.1	20525.4	19521	24555.4	40985.6	5691.7	Q9Y281	Cofilin-2 (Cofilin, muscle isoform)
sp|Q9Y490|TLN1_HUMAN	173170	316103	295459	179430	247638	161465	270975	271692	357845	278809	176802	299932	165839	114412	190421	Q9Y490	Talin-1
sp|Q9Y574|ASB4_HUMAN	61471.6	48867.8	63069.1	36019.6	41923.5	19653.4	66602.1	5846.84	62074.5	9128.61	28607.4	31215.1	6982.18	43074.2	63491.4	Q9Y574	Ankyrin repeat and SOCS box protein 4 (ASB-4)
sp|Q9Y6R7|FCGBP_HUMAN	1.24813e+06	1.60385e+06	1.2439e+06	1.60128e+06	1.49648e+06	1.49883e+06	1.4566e+06	1.94546e+06	1.82749e+06	1.50874e+06	1.4569e+06	1.47435e+06	724812	1.27501e+06	1.31301e+06	Q9Y6R7	IgGFc-binding protein (Fcgamma-binding protein antigen) (FcgammaBP)
sp|Q9Y6Z7|COL10_HUMAN	13001.6	32813.1	81153.7	91704	63166.3	60102	61991.2	32441.7	77831.8	60419.3	51656	6862.88	85027.9	66150.6	68101.9	Q9Y6Z7	Collectin-10 (Collectin liver protein 1) (CL-L1) (Collectin-34) (CL-34)

## Sheet: MARS14-API
Protein	Control-1	Control-2	Control-3	stage I-1	stage I-2	stage I-3	stage II-1	stage II-2	stage II-3	stage III-1	stage III-2	stage III-3	stage IV-1	stage IV-2	stage IV-3	Uniprot ID	Protein.names
sp|P00488|F13A_HUMAN	116393	123862	105651	39923.6	57251.4	63309	32882.8	20500	46259.4	98122.6	31278.9	87232.4	61112.3	100580	114215	P00488	Coagulation factor XIII A chain (Coagulation factor XIIIa) (EC 2.3.2.13) (Protein-glutamine gamma-glutamyltransferase A chain) (Transglutaminase A chain)
sp|P00915|CAH1_HUMAN	95237	89714.1	88609.3	79091.7	73074.7	83481	80352.5	59719.5	73292	181983	258480	265561	91453	90728	85849.4	P00915	Carbonic anhydrase 1 (EC 4.2.1.1) (Carbonate dehydratase I) (Carbonic anhydrase B) (CAB) (Carbonic anhydrase I) (CA-I)
sp|P05090|APOD_HUMAN	13927.3	28393.9	20609.8	7258.36	6140.07	34974.1	1384.03	4988.4	2422.21	25906.6	6729.06	27227.4	1475.67	2827.78	4360.93	P05090	Apolipoprotein D (Apo-D) (ApoD)
sp|P05543|THBG_HUMAN	27671.7	29369.6	28597.3	23876.2	19098.9	22554.2	17380.4	13204.4	15741.7	25953.4	22743	27373.8	22114.8	23684.1	24637.9	P05543	Thyroxine-binding globulin (Serpin A7) (T4-binding globulin)
sp|P08697|A2AP_HUMAN	116454	92207.8	115503	154870	129298	154855	88181.2	86582.7	100186	202239	163805	157810	96989	94139	133690	P08697	Alpha-2-antiplasmin (Alpha-2-AP) (Alpha-2-plasmin inhibitor) (Alpha-2-PI) (Serpin F2)
sp|P36955|PEDF_HUMAN	4.93962e+06	4.71621e+06	4.76474e+06	4.59103e+06	4.81539e+06	4.74181e+06	3.24703e+06	3.32426e+06	3.32679e+06	6.21501e+06	5.97192e+06	5.93353e+06	4.2528e+06	4.28284e+06	4.22393e+06	P36955	Pigment epithelium-derived factor (PEDF) (Cell proliferation-inducing gene 35 protein) (EPC-1) (Serpin F1)
sp|Q6S8J3|POTEE_HUMAN	626767	644634	751442	808946	889780	700200	603648	533636	541442	921316	878768	875401	765372	746550	709114	Q6S8J3	POTE ankyrin domain family member E (ANKRD26-like family C member 1A) (Prostate, ovary, testis-expressed protein on chromosome 2) (POTE-2)
sp|P00738|HPT_HUMAN	68934.4	88004.3	102221	72891.9	88454.7	82013.1	108343	89299.7	120103	90177.9	101374	85594	430638	386048	568120	P00738	Haptoglobin (Zonulin) [Cleaved into: Haptoglobin alpha chain; Haptoglobin beta chain]
sp|P00751|CFAB_HUMAN	3.00318e+06	3.08285e+06	2.93015e+06	3.07857e+06	3.10708e+06	3.04778e+06	2.17499e+06	2.36504e+06	2.32119e+06	3.48891e+06	3.47027e+06	3.40512e+06	3.67706e+06	3.51803e+06	3.62542e+06	P00751	Complement factor B (EC 3.4.21.47) (C3/C5 convertase) (Glycine-rich beta glycoprotein) (GBG) (PBF2) (Properdin factor B) [Cleaved into: Complement factor B Ba fragment; Complement factor B Bb fragment]
sp|P02743|SAMP_HUMAN	623864	682728	583727	1.26901e+06	1.26669e+06	1.24677e+06	1.23866e+06	1.25108e+06	1.24019e+06	1.69718e+06	1.71616e+06	1.68279e+06	2.69894e+06	2.73818e+06	2.666e+06	P02743	Serum amyloid P-component (SAP) (9.5S alpha-1-glycoprotein) [Cleaved into: Serum amyloid P-component(1-203)]
sp|P02775|CXCL7_HUMAN	1.22262e+06	1.22946e+06	1.19939e+06	1.29254e+06	1.39835e+06	1.3651e+06	1.22103e+06	1.25578e+06	1.23885e+06	1.33161e+06	1.24563e+06	1.28213e+06	2.07863e+06	2.13822e+06	2.10225e+06	P02775	Platelet basic protein (PBP) (C-X-C motif chemokine 7) (Leukocyte-derived growth factor) (LDGF) (Macrophage-derived growth factor) (MDGF) (Small-inducible cytokine B7) [Cleaved into: Connective tissue-activating peptide III (CTAP-III) (LA-PF4) (Low-affinity platelet factor IV); TC-2; Connective tissue-activating peptide III(1-81) (CTAP-III(1-81)); Beta-thromboglobulin (Beta-TG); Neutrophil-activa…
sp|P04264|K2C1_HUMAN	349082	303025	252630	639409	625912	643146	552075	585369	591403	523256	533237	533129	1.11649e+06	1.12377e+06	1.1032e+06	P04264	Keratin, type II cytoskeletal 1 (67 kDa cytokeratin) (Cytokeratin-1) (CK-1) (Hair alpha protein) (Keratin-1) (K1) (Type-II keratin Kb1)
sp|P05109|S10A8_HUMAN	140330	139913	121774	159774	166676	164006	95293.8	154143	143192	82413.4	124992	71988.1	209818	224908	200997	P05109	Protein S100-A8 (Calgranulin-A) (Calprotectin L1L subunit) (Cystic fibrosis antigen) (CFAG) (Leukocyte L1 complex light chain) (Migration inhibitory factor-related protein 8) (MRP-8) (p8) (S100 calcium-binding protein A8) (Urinary stone protein band A) [Cleaved into: Protein S100-A8, N-terminally processed]
sp|P06702|S10A9_HUMAN	54110	105552	92731.2	128165	124493	95251.6	87563	103569	73390.1	83933.3	100001	83072.5	247012	241505	229654	P06702	Protein S100-A9 (Calgranulin-B) (Calprotectin L1H subunit) (Leukocyte L1 complex heavy chain) (Migration inhibitory factor-related protein 14) (MRP-14) (p14) (S100 calcium-binding protein A9)
sp|P0C0L4|CO4A_HUMAN	861693	890767	698705	818964	863436	844213	607356	774075	702542	840361	888896	852979	1.15478e+06	947880	1.09426e+06	P0C0L4	Complement C4-A (Acidic complement C4) (C3 and PZP-like alpha-2-macroglobulin domain-containing protein 2) [Cleaved into: Complement C4 beta chain; Complement C4-A alpha chain; C4a anaphylatoxin; C4b-A; C4d-A; Complement C4 gamma chain]
sp|P0C0L5|CO4B_HUMAN	541339	527415	518692	512956	556488	557832	498144	494409	498504	669172	610015	645159	759313	767707	728687	P0C0L5	Complement C4-B (Basic complement C4) (C3 and PZP-like alpha-2-macroglobulin domain-containing protein 3) [Cleaved into: Complement C4 beta chain; Complement C4-B alpha chain; C4a anaphylatoxin; C4b-B; C4d-B; Complement C4 gamma chain]
sp|P13645|K1C10_HUMAN	53492.8	106443	99200.8	141769	152222	150164	129484	172645	172763	121903	128176	122437	317727	318285	313582	P13645	Keratin, type I cytoskeletal 10 (Cytokeratin-10) (CK-10) (Keratin-10) (K10)
sp|P22352|GPX3_HUMAN	50689.1	58309.5	60020.6	152747	156985	142396	151456	143805	87031.6	123851	86858	41625.6	126041	114336	112451	P22352	Glutathione peroxidase 3 (GPx-3) (GSHPx-3) (EC 1.11.1.9) (Extracellular glutathione peroxidase) (Plasma glutathione peroxidase) (GPx-P) (GSHPx-P)
sp|P35527|K1C9_HUMAN	71071.7	62158	57258	178623	188839	177024	111966	136652	134508	105572	127592	118412	231362	233229	233014	P35527	Keratin, type I cytoskeletal 9 (Cytokeratin-9) (CK-9) (Keratin-9) (K9)
sp|Q15828|CYTM_HUMAN	1694.31	6314.15	871.566	8519.53	21997.5	4355.92	1020.36	7759.52	1208.92	434.345	603.447	700.621	2526.57	7707.11	2377.5	Q15828	Cystatin-M (Cystatin-6) (Cystatin-E)
sp|P00748|FA12_HUMAN	5.49513e+06	5.66638e+06	5.61276e+06	3.52313e+06	3.33649e+06	3.30893e+06	5.38184e+06	5.5673e+06	5.44535e+06	3.98195e+06	4.16596e+06	3.93088e+06	4.06637e+06	4.0726e+06	4.1122e+06	P00748	Coagulation factor XII (EC 3.4.21.38) (Hageman factor) (HAF) [Cleaved into: Coagulation factor XIIa heavy chain; Beta-factor XIIa part 1; Coagulation factor XIIa light chain (Beta-factor XIIa part 2)]
sp|P01042|KNG1_HUMAN	1.4235e+07	1.39407e+07	1.39084e+07	9.94206e+06	1.01744e+07	1.00028e+07	1.63902e+07	1.67636e+07	1.6907e+07	1.17394e+07	1.16646e+07	1.13887e+07	1.18435e+07	1.17336e+07	1.19048e+07	P01042	Kininogen-1 (Alpha-2-thiol proteinase inhibitor) (Fitzgerald factor) (High molecular weight kininogen) (HMWK) (Williams-Fitzgerald-Flaujeac factor) [Cleaved into: Kininogen-1 heavy chain; T-kinin (Ile-Ser-Bradykinin); Bradykinin (Kallidin I); Lysyl-bradykinin (Kallidin II); Kininogen-1 light chain; Low molecular weight growth-promoting factor]
sp|P01591|IGJ_HUMAN	12607	9458.73	11905.6	2412.88	4511.48	6559.81	977.645	2368.77	2274.89	1082.52	1284.17	2026.99	7017.54	8149.19	11634.5	P01591	Immunoglobulin J chain (Joining chain of multimeric IgA and IgM)
sp|P02652|APOA2_HUMAN	37553	46874.6	32579.3	4578.24	34566.6	4280.64	23912.6	2450.67	4109.53	3187.41	2804.27	2808.59	20086.2	26917.2	29035.8	P02652	Apolipoprotein A-II (Apo-AII) (ApoA-II) (Apolipoprotein A2) [Cleaved into: Proapolipoprotein A-II (ProapoA-II); Truncated apolipoprotein A-II (Apolipoprotein A-II(1-76))]
sp|P02753|RET4_HUMAN	6.47397e+06	7.69018e+06	6.47157e+06	4.44953e+06	4.60655e+06	4.24745e+06	6.90508e+06	6.05704e+06	7.25401e+06	5.07694e+06	4.85999e+06	4.76311e+06	4.97031e+06	6.1191e+06	6.06158e+06	P02753	Retinol-binding protein 4 (Plasma retinol-binding protein) (PRBP) (RBP) [Cleaved into: Plasma retinol-binding protein(1-182); Plasma retinol-binding protein(1-181); Plasma retinol-binding protein(1-179); Plasma retinol-binding protein(1-176)]
sp|P06727|APOA4_HUMAN	5.30738e+06	5.1022e+06	4.92073e+06	1.83497e+06	1.94186e+06	1.87633e+06	2.79042e+06	2.92691e+06	2.84906e+06	2.20388e+06	2.26679e+06	2.17273e+06	2.17086e+06	2.19727e+06	2.366e+06	P06727	Apolipoprotein A-IV (Apo-AIV) (ApoA-IV) (Apolipoprotein A4)
sp|P09172|DOPO_HUMAN	189771	157694	174646	132280	107166	152941	90956.1	87991.6	54001.3	73370.4	107530	91916.7	118337	154215	89801.7	P09172	Dopamine beta-hydroxylase (EC 1.14.17.1) (Dopamine beta-monooxygenase) [Cleaved into: Soluble dopamine beta-hydroxylase]
sp|P11226|MBL2_HUMAN	272904	268613	272990	235783	242649	244121	311749	318499	323524	228665	225183	199752	318657	337428	329382	P11226	Mannose-binding protein C (MBP-C) (Collectin-1) (MBP1) (Mannan-binding protein) (Mannose-binding lectin)
sp|P22891|PROZ_HUMAN	40521.3	41285.4	45606.9	25900.5	18093.1	25158.5	22781.1	37001.1	31760.8	11176.1	24889.1	23074.8	19640.3	34437.2	34658.5	P22891	Vitamin K-dependent protein Z
sp|P51884|LUM_HUMAN	2.26267e+06	2.25094e+06	2.39531e+06	1.54732e+06	1.50188e+06	1.37506e+06	2.06731e+06	2.16022e+06	2.18555e+06	1.4853e+06	1.48175e+06	1.46211e+06	1.60866e+06	1.6679e+06	1.60536e+06	P51884	Lumican (Keratan sulfate proteoglycan lumican) (KSPG lumican)
sp|P62328|TYB4_HUMAN	42064	33559	33106.5	31666.1	39903.8	34613.9	49307.8	57450.9	49255.4	29608.9	29147.4	35174	31030.5	39282.9	38613	P62328	Thymosin beta-4 (T beta-4) (Fx) [Cleaved into: Hematopoietic system regulatory peptide (Seraspenide)]
sp|P01008|ANT3_HUMAN	8.714e+06	9.11647e+06	8.74524e+06	6.96973e+06	6.76304e+06	6.91758e+06	6.94075e+06	7.04243e+06	7.02214e+06	1.23804e+07	1.15449e+07	1.1411e+07	1.13089e+07	1.08275e+07	1.09343e+07	P01008	Antithrombin-III (ATIII) (Serpin C1)
sp|P02533|K1C14_HUMAN	4649.22	1017.77	3514.38	1080.16	4389	6151.35	7435.49	10963.8	13349.5	8838.39	12521.1	3495.54	26146.4	33214	29468.4	P02533	Keratin, type I cytoskeletal 14 (Cytokeratin-14) (CK-14) (Keratin-14) (K14)
sp|P02750|A2GL_HUMAN	4.54005e+06	4.41131e+06	4.82478e+06	3.0975e+06	3.02881e+06	2.93658e+06	5.17923e+06	5.04243e+06	5.20584e+06	4.73288e+06	4.76627e+06	4.80657e+06	7.4407e+06	6.70398e+06	6.91884e+06	P02750	Leucine-rich alpha-2-glycoprotein (LRG)
sp|P02776|PLF4_HUMAN	52215.9	72016.5	71263.1	37787.6	47331.4	27677.6	60581.4	65929.4	32858.6	64083.1	70802.4	50521.8	72646.5	112311	94005.4	P02776	Platelet factor 4 (PF-4) (C-X-C motif chemokine 4) (Iroplact) (Oncostatin-A) [Cleaved into: Platelet factor 4, short form]
sp|P03951|FA11_HUMAN	708892	618731	572720	399156	382939	367633	488266	523588	449018	628819	612619	605699	580455	565915	573291	P03951	Coagulation factor XI (FXI) (EC 3.4.21.27) (Plasma thromboplastin antecedent) (PTA) [Cleaved into: Coagulation factor XIa heavy chain; Coagulation factor XIa light chain]
sp|P03952|KLKB1_HUMAN	1.83232e+06	1.76128e+06	1.86299e+06	1.17664e+06	1.15805e+06	1.1627e+06	1.31813e+06	1.40531e+06	1.37675e+06	1.8331e+06	1.75485e+06	1.79675e+06	1.84646e+06	1.94374e+06	1.86483e+06	P03952	Plasma kallikrein (EC 3.4.21.34) (Fletcher factor) (Kininogenin) (Plasma prekallikrein) (PKK) [Cleaved into: Plasma kallikrein heavy chain; Plasma kallikrein light chain]
sp|P04003|C4BPA_HUMAN	772448	767367	723127	471331	450501	450075	1.03099e+06	1.04496e+06	1.07908e+06	1.04066e+06	957582	970150	1.06335e+06	1.10058e+06	1.02577e+06	P04003	C4b-binding protein alpha chain (C4bp) (Proline-rich protein) (PRP)
sp|P04004|VTNC_HUMAN	1.21889e+07	1.27277e+07	1.27092e+07	7.27831e+06	8.06108e+06	7.19996e+06	1.11029e+07	1.16965e+07	1.1771e+07	1.24184e+07	1.162e+07	1.13291e+07	1.17395e+07	1.18222e+07	1.13683e+07	P04004	Vitronectin (VN) (S-protein) (Serum-spreading factor) (V75) [Cleaved into: Vitronectin V65 subunit; Vitronectin V10 subunit; Somatomedin-B]
sp|P05156|CFAI_HUMAN	6.89661e+06	6.64585e+06	6.61675e+06	4.47189e+06	4.8666e+06	4.45939e+06	6.69163e+06	6.78153e+06	6.84518e+06	6.16521e+06	5.90523e+06	5.87662e+06	7.01091e+06	7.19415e+06	7.11566e+06	P05156	Complement factor I (EC 3.4.21.45) (C3B/C4B inactivator) [Cleaved into: Complement factor I heavy chain; Complement factor I light chain]
sp|P08185|CBG_HUMAN	12610.6	13251	24066.3	4060.99	13425.5	11587.2	24259.9	16105.5	20506.6	20721	31672.2	23776.9	32161.5	26416.4	32363.3	P08185	Corticosteroid-binding globulin (CBG) (Serpin A6) (Transcortin)
sp|P10720|PF4V_HUMAN	39342.3	44747.8	41903.5	17874.4	25997.8	17415.1	30022.1	33970	29315	53297.2	41288.1	42663	60720.3	71494.7	59781.2	P10720	Platelet factor 4 variant (C-X-C motif chemokine 4 variant) (CXCL4L1) (PF4alt) (PF4var1) [Cleaved into: Platelet factor 4 variant(4-74); Platelet factor 4 variant(5-74); Platelet factor 4 variant(6-74)]
sp|P20851|C4BPB_HUMAN	44669.3	48269.5	43900.4	26214.9	28456.3	31990.7	50938.8	63842.4	73008	57372	62682.9	58072.7	66296.4	66837.4	64735	P20851	C4b-binding protein beta chain
sp|Q96IY4|CBPB2_HUMAN	98433.2	106483	108521	90572.2	65639.5	77890.6	83111	85141.7	79787.1	141285	143773	131456	135425	101445	117932	Q96IY4	Carboxypeptidase B2 (EC 3.4.17.20) (Carboxypeptidase U) (CPU) (Plasma carboxypeptidase B) (pCPB) (Thrombin-activable fibrinolysis inhibitor) (TAFI)
sp|Q9BVM4|GGACT_HUMAN	288003	295597	338561	260850	190005	207632	253092	248016	219746	421934	402807	392535	428135	329671	365415	Q9BVM4	Gamma-glutamylaminecyclotransferase (GGACT) (EC 2.3.2.4) (AIG2-like domain-containing protein 1) (Gamma-glutamylamine cyclotransferase)
sp|P01034|CYTC_HUMAN	70696.6	71668.1	69104.8	36254.1	45362.4	39519.7	65083.5	67879.7	60391.3	56723.9	52891.3	66276.2	57050.2	56053	51514.4	P01034	Cystatin-C (Cystatin-3) (Gamma-trace) (Neuroendocrine basic polypeptide) (Post-gamma-globulin)
sp|P02787|TRFE_HUMAN	105276	188748	137204	99209.1	203507	124347	398142	377960	420445	205604	188146	253170	135159	140226	202080	P02787	Serotransferrin (Transferrin) (Beta-1 metal-binding globulin) (Siderophilin)
sp|P04070|PROC_HUMAN	61836.4	43404.6	54063.6	34480.4	42383.1	26151.5	47711.8	37121.4	24983.6	43528.4	38574.8	29791.2	15466.6	19784.8	25690.8	P04070	Vitamin K-dependent protein C (EC 3.4.21.69) (Anticoagulant protein C) (Autoprothrombin IIA) (Blood coagulation factor XIV) [Cleaved into: Vitamin K-dependent protein C light chain; Vitamin K-dependent protein C heavy chain; Activation peptide]
sp|P04196|HRG_HUMAN	1.72441e+06	1.7167e+06	1.77436e+06	1.49987e+06	1.53031e+06	1.4356e+06	2.49784e+06	2.39285e+06	2.4631e+06	2.09673e+06	2.18389e+06	2.06239e+06	1.09434e+06	1.14631e+06	1.09807e+06	P04196	Histidine-rich glycoprotein (Histidine-proline-rich glycoprotein) (HPRG)
sp|P05155|IC1_HUMAN	4.52807e+06	4.35835e+06	2.90445e+06	3.17316e+06	2.55726e+06	3.202e+06	5.02912e+06	4.74737e+06	4.4483e+06	5.05778e+06	5.26471e+06	5.05192e+06	3.46659e+06	4.56071e+06	4.46629e+06	P05155	Plasma protease C1 inhibitor (C1 Inh) (C1Inh) (C1 esterase inhibitor) (C1-inhibiting factor) (Serpin G1)
sp|P08833|IBP1_HUMAN	3749.66	4813.23	1666.38	6069.69	662.507	2606.36	11189.6	10196.6	12086.6	11942.4	10425.5	11581.7	3714.6	3695.3	4481.75	P08833	Insulin-like growth factor-binding protein 1 (IBP-1) (IGF-binding protein 1) (IGFBP-1) (Placental protein 12) (PP12)
sp|P13671|CO6_HUMAN	756600	804865	694499	525226	656672	635940	888786	894760	925060	706176	600645	741508	548897	493779	578676	P13671	Complement component C6
sp|Q14520|HABP2_HUMAN	291626	268277	234337	139967	142671	189826	210812	189827	174777	229703	277028	258266	193132	195677	189103	Q14520	Hyaluronan-binding protein 2 (EC 3.4.21.-) (Factor VII-activating protease) (Factor seven-activating protease) (FSAP) (Hepatocyte growth factor activator-like protein) (Plasma hyaluronan-binding protein) [Cleaved into: Hyaluronan-binding protein 2 50 kDa heavy chain; Hyaluronan-binding protein 2 50 kDa heavy chain alternate form; Hyaluronan-binding protein 2 27 kDa light chain; Hyaluronan-binding…
sp|Q15848|ADIPO_HUMAN	334282	330023	310473	225270	199736	218193	299737	295058	303504	332021	302700	312455	261203	286337	268266	Q15848	Adiponectin (30 kDa adipocyte complement-related protein) (Adipocyte complement-related 30 kDa protein) (ACRP30) (Adipocyte, C1q and collagen domain-containing protein) (Adipose most abundant gene transcript 1 protein) (apM-1) (Gelatin-binding protein)
sp|P02452|CO1A1_HUMAN	72077.6	91390.4	59379	6.30163e+06	6.52093e+06	6.34266e+06	86295.7	63587.7	71110.8	187387	80466.3	67267.7	77873.2	52271.5	50089.7	P02452	Collagen alpha-1(I) chain (Alpha-1 type I collagen)
sp|P02655|APOC2_HUMAN	25411.5	24740.9	20047.6	68617.9	44127.4	52332.9	24515.7	28783.8	45514.7	45825.1	44051.6	28625.2	25287.2	22325.2	37912	P02655	Apolipoprotein C-II (Apo-CII) (ApoC-II) (Apolipoprotein C2) [Cleaved into: Proapolipoprotein C-II (ProapoC-II)]
sp|P02656|APOC3_HUMAN	75091.4	81326.4	90837	171391	156971	162621	159017	111089	158883	153087	145012	109104	44732.5	82912.6	97753.5	P02656	Apolipoprotein C-III (Apo-CIII) (ApoC-III) (Apolipoprotein C3)
sp|P02747|C1QC_HUMAN	36297.2	60869.9	25927.5	991766	1.22369e+06	54598.1	58436.9	16099.6	17781	34715.2	20251.6	45105.2	26874.9	29105.8	32133.3	P02747	Complement C1q subcomponent subunit C
sp|P02768|ALBU_HUMAN	356119	370190	391956	498027	497403	508872	691316	716382	694433	416103	400288	404781	351687	300750	310189	P02768	Serum albumin
sp|P04040|CATA_HUMAN	25679.1	8332.36	13809.6	21389.9	19463.4	12038.1	14952.4	19991.2	15768.3	39893.8	44698.2	71449.5	7401.57	3321.56	15516.5	P04040	Catalase (EC 1.11.1.6)
sp|P04114|APOB_HUMAN	44068.2	33366.1	36100.4	77156.1	102716	45557.6	121286	78217.4	108286	86450.1	135840	106915	73103.7	132901	69225.5	P04114	Apolipoprotein B-100 (Apo B-100) [Cleaved into: Apolipoprotein B-48 (Apo B-48)]
sp|P08123|CO1A2_HUMAN	23884.6	20609.6	34841.8	1.32229e+06	1.47444e+06	1.42963e+06	53198	15699.9	54020.9	117630	18411.4	16409.8	18286.1	23163.3	28400.7	P08123	Collagen alpha-2(I) chain (Alpha-2 type I collagen)
sp|P10909|CLUS_HUMAN	1.42917e+06	1.25176e+06	1.37789e+06	1.25908e+06	1.3255e+06	1.38865e+06	1.65274e+06	1.60506e+06	1.44192e+06	1.10913e+06	1.37512e+06	1.0502e+06	1.10427e+06	855724	842454	P10909	Clusterin (Aging-associated gene 4 protein) (Apolipoprotein J) (Apo-J) (Complement cytolysis inhibitor) (CLI) (Complement-associated protein SP-40,40) (Ku70-binding protein 1) (NA1/NA2) (Testosterone-repressed prostate message 2) (TRPM-2) [Cleaved into: Clusterin beta chain (ApoJalpha) (Complement cytolysis inhibitor a chain); Clusterin alpha chain (ApoJbeta) (Complement cytolysis inhibitor b cha…
sp|P12111|CO6A3_HUMAN	1046.63	1299.83	6265.43	30275.6	2090.7	5917.46	6527.6	23856.2	4518.93	54125.2	17840	38188.8	591.017	2722.92	6138.06	P12111	Collagen alpha-3(VI) chain
sp|P22792|CPN2_HUMAN	11662.1	11444	8032.04	40978.2	39010.3	13962.3	9381.57	30120.7	18609.9	30730.3	49171.2	33927.8	16283.1	29492.1	24679.4	P22792	Carboxypeptidase N subunit 2 (Carboxypeptidase N 83 kDa chain) (Carboxypeptidase N large subunit) (Carboxypeptidase N polypeptide 2) (Carboxypeptidase N regulatory subunit)
sp|P27918|PROP_HUMAN	2.12351e+06	2.11295e+06	2.03513e+06	2.57746e+06	2.65093e+06	2.74503e+06	1.7738e+06	1.87953e+06	1.99212e+06	2.03646e+06	1.9676e+06	2.00462e+06	1.722e+06	1.76106e+06	1.6358e+06	P27918	Properdin (Complement factor P)
sp|P81605|DCD_HUMAN	108450	95097.7	94955.3	312355	331272	315808	98510.8	102395	111995	108304	115681	107105	109437	104139	102240	P81605	Dermcidin (EC 3.4.-.-) (Preproteolysin) [Cleaved into: Survival-promoting peptide; DCD-1]
sp|Q06033|ITIH3_HUMAN	5763.15	12405.1	7315.98	17190.5	25048.6	23364.8	30310.8	7739.81	18752.6	12831.7	6486.04	19612.5	5192.91	8374.69	4475.51	Q06033	Inter-alpha-trypsin inhibitor heavy chain H3 (ITI heavy chain H3) (ITI-HC3) (Inter-alpha-inhibitor heavy chain 3) (Serum-derived hyaluronan-associated protein) (SHAP)
sp|Q5SYB0|FRPD1_HUMAN	7035.15	2460.53	3783.03	3164.99	43796.3	7134.89	26384.5	27727.9	27228.8	23750.9	23674.7	24386	19720.7	25000.4	29146	Q5SYB0	FERM and PDZ domain-containing protein 1 (FERM domain-containing protein 2)
sp|Q5T1H1|EYS_HUMAN	97408.8	97202.9	102234	100870	118363	101073	71938.8	72713.1	82133.9	58211.1	67955.2	64314.1	53777	57043.6	53270	Q5T1H1	Protein eyes shut homolog (Epidermal growth factor-like protein 10) (EGF-like protein 10) (Epidermal growth factor-like protein 11) (EGF-like protein 11) (Protein spacemaker homolog)
sp|Q68CL5|TPGS2_HUMAN	1364.5	3086.46	2027.31	94688.5	77210.3	94149.4	2200.13	335.433	5430.54	385.931	2421.18	605.404	1632.54	1630.41	2827.72	Q68CL5	Tubulin polyglutamylase complex subunit 2 (PGs2)
sp|A1L4H1|SRCRL_HUMAN	2510.93	1287.04	2879.4	535.84	2252.02	2691.28	1798.63	1652.24	1556.9	3043.54	764.09	1644.14	2252.91	1043.51	1458.87	A1L4H1	Soluble scavenger receptor cysteine-rich domain-containing protein SSC5D (Soluble scavenger protein with 5 SRCR domains) (SSc5D)
sp|O00187|MASP2_HUMAN	41484.4	7282.15	7013.55	6705.81	29699.8	13628.9	15175.7	1315.72	26495.8	9551.56	8351.59	17585.2	14393.1	19796.3	34732.5	O00187	Mannan-binding lectin serine protease 2 (EC 3.4.21.104) (MBL-associated serine protease 2) (Mannose-binding protein-associated serine protease 2) (MASP-2) [Cleaved into: Mannan-binding lectin serine protease 2 A chain; Mannan-binding lectin serine protease 2 B chain]
sp|O00391|QSOX1_HUMAN	50008.2	20469.3	12840.8	11771.6	15073.4	9736.05	16561.6	16957.5	32426.1	32106.2	4152.2	20467.2	21137.4	24061.7	25006.9	O00391	Sulfhydryl oxidase 1 (hQSOX) (EC 1.8.3.2) (Quiescin Q6)
sp|O00533|NCHL1_HUMAN	7628.52	7154.36	8742.46	5734.18	5491.51	4541.73	7131.76	7971.44	6230.29	5270.92	6753.43	5257.29	1412.11	6973.66	6545.14	O00533	Neural cell adhesion molecule L1-like protein (Close homolog of L1) [Cleaved into: Processed neural cell adhesion molecule L1-like protein]
sp|O00592|PODXL_HUMAN	7327.5	8914.91	8028.07	7178.47	10842.2	8423.65	7175.52	5436	7290.43	6245.44	10432.8	9690.64	8036.42	8145.59	7906.92	O00592	Podocalyxin (GCTM-2 antigen) (Gp200) (Podocalyxin-like protein 1) (PC) (PCLP-1)
sp|O14786|NRP1_HUMAN	8272.44	13012.8	13912.5	2319.98	12696.4	2315.4	11727	2646.6	8865.35	15520.8	4110.85	6141.89	9618.21	14077.8	11554.8	O14786	Neuropilin-1 (Vascular endothelial cell growth factor 165 receptor) (CD antigen CD304)
sp|O14791|APOL1_HUMAN	296.311	10371.5	2802.15	10713.2	5183.11	15713.2	7478.12	4981.49	1620.28	12274.7	8879.34	10608.6	1661.59	14138.3	6021.98	O14791	Apolipoprotein L1 (Apolipoprotein L) (Apo-L) (ApoL) (Apolipoprotein L-I) (ApoL-I)
sp|O15204|ADEC1_HUMAN	1352.46	222.133	3390.48	203.681	4347.56	779.772	5288.17	4161.31	4069.03	2235.14	3581.71	1641.06	2760.48	6813.25	2580.93	O15204	ADAM DEC1 (EC 3.4.24.-) (A disintegrin and metalloproteinase domain-like protein decysin-1) (ADAM-like protein decysin-1)
sp|O43805|SSNA1_HUMAN	63168.1	84555.4	63053.2	77385	57470	55143.1	58571.7	63247.3	58597.2	84946.3	74319	71934	86329.8	80854.9	86347.8	O43805	Sjoegren syndrome nuclear autoantigen 1 (Nuclear autoantigen of 14 kDa)
sp|O43866|CD5L_HUMAN	671509	639039	657094	575491	608628	560985	613886	559552	609310	599646	530842	523063	614514	691275	593273	O43866	CD5 antigen-like (Apoptosis inhibitor expressed by macrophages) (hAIM) (CT-2) (IgM-associated peptide) (SP-alpha)
sp|O75144|ICOSL_HUMAN	12312.5	10784.6	11595.4	9028.06	10183.9	5672.8	12744.6	2880.62	11199.2	10963.8	7828.99	9442.48	11743.5	9433.61	10106.6	O75144	ICOS ligand (B7 homolog 2) (B7-H2) (B7-like protein Gl50) (B7-related protein 1) (B7RP-1) (CD antigen CD275)
sp|O75636|FCN3_HUMAN	1.77332e+06	1.76022e+06	1.8103e+06	1.98691e+06	1.93287e+06	1.95386e+06	1.39779e+06	1.39792e+06	1.42967e+06	1.88575e+06	1.85268e+06	1.80059e+06	1.59289e+06	1.58299e+06	1.59476e+06	O75636	Ficolin-3 (Collagen/fibrinogen domain-containing lectin 3 p35) (Collagen/fibrinogen domain-containing protein 3) (Hakata antigen)
sp|O75882|ATRN_HUMAN	2.62371e+06	2.54083e+06	2.39223e+06	2.66961e+06	2.94857e+06	2.7801e+06	2.19738e+06	2.36373e+06	2.18629e+06	2.43411e+06	2.41202e+06	2.24557e+06	2.21396e+06	2.31943e+06	2.23115e+06	O75882	Attractin (DPPT-L) (Mahogany homolog)
sp|O76054|S14L2_HUMAN	1189.16	4358.62	7891.74	1695.76	4850.64	2358.11	5941.71	924.582	1440.29	3579.17	2865.41	2574.54	7682.62	4545.95	4010.79	O76054	SEC14-like protein 2 (Alpha-tocopherol-associated protein) (TAP) (hTAP) (Squalene transfer protein) (Supernatant protein factor) (SPF)
sp|O95445|APOM_HUMAN	5792.58	2106.63	4623.49	12017.6	9663.44	13074.8	2976.95	2408.33	877.377	1552.01	10628.1	7867.48	3593.85	4872.84	881.348	O95445	Apolipoprotein M (Apo-M) (ApoM) (Protein G3a)
sp|O95497|VNN1_HUMAN	16519.5	15648.4	16706	26953.4	26182.6	27103.9	17879	18857.4	21798.1	21807.7	1337.92	975.431	5895.41	21833.1	16977.5	O95497	Pantetheinase (EC 3.5.1.92) (Pantetheine hydrolase) (Tiff66) (Vascular non-inflammatory molecule 1) (Vanin-1)
sp|P00450|CERU_HUMAN	3.79408e+07	3.77742e+07	3.89029e+07	5.39239e+07	5.24818e+07	5.34335e+07	5.44975e+07	5.44957e+07	5.45065e+07	4.07684e+07	3.93573e+07	3.9376e+07	4.6043e+07	4.57992e+07	4.53535e+07	P00450	Ceruloplasmin (EC 1.16.3.1) (Ferroxidase)
sp|P00734|THRB_HUMAN	693108	684243	754351	535567	587863	760422	597992	464788	498452	767459	573200	554805	478103	554582	359381	P00734	Prothrombin (EC 3.4.21.5) (Coagulation factor II) [Cleaved into: Activation peptide fragment 1; Activation peptide fragment 2; Thrombin light chain; Thrombin heavy chain]
sp|P00736|C1R_HUMAN	49007.9	43357.9	22162.7	46038.5	32706.9	82431.2	18262	98743.7	18762.3	109333	60345.9	35641.2	44922.7	28889.2	25376.2	P00736	Complement C1r subcomponent (EC 3.4.21.41) (Complement component 1 subcomponent r) [Cleaved into: Complement C1r subcomponent heavy chain; Complement C1r subcomponent light chain]
sp|P00739|HPTR_HUMAN	73878.3	8626.88	1851.94	3853.32	2842.23	11691.5	11301.6	3472.39	17436.6	6898.16	8906.37	3988.66	23587.7	22346.3	25922	P00739	Haptoglobin-related protein
sp|P00740|FA9_HUMAN	131939	178343	162667	130870	115944	119692	155663	144311	141308	101407	148786	132469	131301	169212	131444	P00740	Coagulation factor IX (EC 3.4.21.22) (Christmas factor) (Plasma thromboplastin component) (PTC) [Cleaved into: Coagulation factor IXa light chain; Coagulation factor IXa heavy chain]
sp|P00742|FA10_HUMAN	506386	490641	453110	356698	384965	374356	437611	411994	475952	378527	371729	360793	385518	383603	340571	P00742	Coagulation factor X (EC 3.4.21.6) (Stuart factor) (Stuart-Prower factor) [Cleaved into: Factor X light chain; Factor X heavy chain; Activated factor Xa heavy chain]
sp|P00746|CFAD_HUMAN	397728	431760	432893	431657	396883	403181	361205	343572	326571	464505	419313	413166	329558	343886	354225	P00746	Complement factor D (EC 3.4.21.46) (Adipsin) (C3 convertase activator) (Properdin factor D)
sp|P00747|PLMN_HUMAN	1.41738e+06	1.28661e+06	1.37729e+06	1.1575e+06	1.12496e+06	1.09286e+06	1.33133e+06	1.36854e+06	1.36948e+06	1.34006e+06	1.17437e+06	1.09918e+06	933713	946660	906608	P00747	Plasminogen (EC 3.4.21.7) [Cleaved into: Plasmin heavy chain A; Activation peptide; Angiostatin; Plasmin heavy chain A, short form; Plasmin light chain B]
sp|P01009|A1AT_HUMAN	7577.48	24820.5	19077.6	11974.5	10987	14854.3	17927.8	8157.31	8196.22	33986.7	16952.6	8779.64	15904.7	14988.3	51722.4	P01009	Alpha-1-antitrypsin (Alpha-1 protease inhibitor) (Alpha-1-antiproteinase) (Serpin A1) [Cleaved into: Short peptide from AAT (SPAAT)]
sp|P01011|AACT_HUMAN	1.60419e+07	1.57669e+07	1.60491e+07	1.39886e+07	1.45364e+07	1.39205e+07	1.38113e+07	1.41438e+07	1.42415e+07	1.65602e+07	1.62546e+07	1.58458e+07	1.83433e+07	1.8499e+07	1.82214e+07	P01011	Alpha-1-antichymotrypsin (ACT) (Cell growth-inhibiting gene 24/25 protein) (Serpin A3) [Cleaved into: Alpha-1-antichymotrypsin His-Pro-less]
sp|P01019|ANGT_HUMAN	78848.5	29876.3	43147.1	56370.6	47314.4	28115	40229.6	32830.3	46561.5	62928.1	66262.6	101902	30758.1	66631.8	44834.6	P01019	Angiotensinogen (Serpin A8) [Cleaved into: Angiotensin-1 (Angiotensin 1-10) (Angiotensin I) (Ang I); Angiotensin-2 (Angiotensin 1-8) (Angiotensin II) (Ang II); Angiotensin-3 (Angiotensin 2-8) (Angiotensin III) (Ang III) (Des-Asp[1]-angiotensin II); Angiotensin-4 (Angiotensin 3-8) (Angiotensin IV) (Ang IV); Angiotensin 1-9; Angiotensin 1-7; Angiotensin 1-5; Angiotensin 1-4]
sp|P01023|A2MG_HUMAN	51115.4	42803.5	36325.5	58882.7	125771	27214	23635.7	23626.3	29358.2	134548	59462.6	73520.7	12435.7	64382.3	39366.6	P01023	Alpha-2-macroglobulin (Alpha-2-M) (C3 and PZP-like alpha-2-macroglobulin domain-containing protein 5)
sp|P01024|CO3_HUMAN	106229	250449	143971	86844.1	59799.7	95804.8	269638	102604	96588	242922	136966	117591	285044	224631	66184.6	P01024	Complement C3 (C3 and PZP-like alpha-2-macroglobulin domain-containing protein 1) [Cleaved into: Complement C3 beta chain; C3-beta-c (C3bc); Complement C3 alpha chain; C3a anaphylatoxin; Acylation stimulating protein (ASP) (C3adesArg); Complement C3b alpha' chain; Complement C3c alpha' chain fragment 1; Complement C3dg fragment; Complement C3g fragment; Complement C3d fragment; Complement C3f fra…
sp|P01031|CO5_HUMAN	35072.5	39599.5	33936.3	25460.3	71697.7	80723.3	111698	38234.6	89152.4	119994	125385	44011.8	147435	116694	40703	P01031	Complement C5 (C3 and PZP-like alpha-2-macroglobulin domain-containing protein 4) [Cleaved into: Complement C5 beta chain; Complement C5 alpha chain; C5a anaphylatoxin; Complement C5 alpha' chain]
sp|P01033|TIMP1_HUMAN	65899.6	3045.57	1873.58	14687.8	2986.64	71391.8	57321.1	1631.55	55903.9	76252.2	72854.7	75090.9	60144.1	1178.64	68718.5	P01033	Metalloproteinase inhibitor 1 (Erythroid-potentiating activity) (EPA) (Fibroblast collagenase inhibitor) (Collagenase inhibitor) (Tissue inhibitor of metalloproteinases 1) (TIMP-1)
sp|P01344|IGF2_HUMAN	261952	247904	271747	222518	232316	222233	211593	209972	188257	255990	250142	241718	205538	207511	190629	P01344	Insulin-like growth factor II (IGF-II) (Somatomedin-A) (T3M-11-derived growth factor) [Cleaved into: Insulin-like growth factor II; Insulin-like growth factor II Ala-25 Del; Preptin]
sp|P01708|LV205_HUMAN	37429.1	40505.5	33854.4	45873.5	52075.4	52912.1	51741	58789.9	58666.9	79995.1	39541.5	35748	48722.8	49521.2	51350.2	P01708	Merged into P01706.
sp|P01857|IGHG1_HUMAN	6650.38	6553.85	2344.18	709.562	5637.77	6888.21	877.149	3123.79	465.952	4201.66	8220.41	2337.93	4829.17	6520.66	1742.73	P01857	Ig gamma-1 chain C region
sp|P01860|IGHG3_HUMAN	8427.39	16598.1	10479.1	1817.1	14136.9	19862.9	25763.1	23141.1	20942	8932.23	16304.3	12722.2	19994.2	10070.1	22754.1	P01860	Ig gamma-3 chain C region (HDC) (Heavy chain disease protein)
sp|P01871|IGHM_HUMAN	4088.07	1810.96	4012.01	3012.59	16847.2	1720.96	3792.99	5425.36	4405.76	3510.46	826.805	368.461	2734.67	388.801	755.123	P01871	Ig mu chain C region
sp|P01876|IGHA1_HUMAN	2960.99	4178.31	6039.74	3075.07	1331.01	1684.85	10074.4	823.358	5948.25	3265.15	9048.74	4427.3	5259.95	7703.25	2764.24	P01876	Ig alpha-1 chain C region
sp|P02647|APOA1_HUMAN	7646.18	26071.9	23966.1	18213.5	16759.2	7277.24	4261.17	22174.2	15069.5	27415.9	11731.4	15194.6	18804.9	12445.5	21006.3	P02647	Apolipoprotein A-I (Apo-AI) (ApoA-I) (Apolipoprotein A1) [Cleaved into: Proapolipoprotein A-I (ProapoA-I); Truncated apolipoprotein A-I (Apolipoprotein A-I(1-242))]
sp|P02649|APOE_HUMAN	440020	477690	402209	448685	445968	443694	117428	436990	386214	468985	182966	499568	353868	97550.7	361914	P02649	Apolipoprotein E (Apo-E)
sp|P02654|APOC1_HUMAN	90591.1	68430.1	5164.62	54370.7	74683.3	70514.2	18466.9	6138.47	7653.06	56530.1	12519.5	9025.47	10044.5	6764.79	55966.5	P02654	Apolipoprotein C-I (Apo-CI) (ApoC-I) (Apolipoprotein C1) [Cleaved into: Truncated apolipoprotein C-I]
sp|P02671|FIBA_HUMAN	345678	342447	403885	433010	467479	461953	382673	414601	375103	536004	445886	452405	357012	458697	411652	P02671	Fibrinogen alpha chain [Cleaved into: Fibrinopeptide A; Fibrinogen alpha chain]
sp|P02675|FIBB_HUMAN	185429	180598	279086	337762	213893	380081	341162	300429	275372	335747	286672	260953	242058	194389	230685	P02675	Fibrinogen beta chain [Cleaved into: Fibrinopeptide B; Fibrinogen beta chain]
sp|P02679|FIBG_HUMAN	77179.4	66624.5	90231.1	93524.2	82348	54527.2	43829.7	59221.1	47329.2	137612	71092.5	140458	84719.2	47011.2	82973.6	P02679	Fibrinogen gamma chain
sp|P02741|CRP_HUMAN	73101	2322.83	121832	34819.3	125305	69119.7	35792.2	79118.4	28065.6	119423	112937	110176	86773.3	100011	68702.8	P02741	C-reactive protein [Cleaved into: C-reactive protein(1-205)]
sp|P02745|C1QA_HUMAN	3041.77	3925.68	5581.23	1758.59	5105.55	4700.76	4513.5	3636.09	3195.1	2639.26	6929.37	9627.13	5111.69	4653.71	2017	P02745	Complement C1q subcomponent subunit A
sp|P02746|C1QB_HUMAN	2321.56	16121.6	1386.78	10470.7	10903	2455.16	25134.5	24172.2	8109.25	1300.52	7605.35	9951.81	486.678	7541.91	16492.7	P02746	Complement C1q subcomponent subunit B
sp|P02748|CO9_HUMAN	69675.1	104013	69368.7	43080.9	102528	95503.1	64457.7	42532.7	54065.4	55027.3	23906.6	37161.5	69425	87910	74089.4	P02748	Complement component C9 [Cleaved into: Complement component C9a; Complement component C9b]
sp|P02749|APOH_HUMAN	5.2136e+07	5.09322e+07	5.04052e+07	5.61089e+07	5.71945e+07	5.51987e+07	4.6997e+07	4.91314e+07	4.74176e+07	5.26482e+07	5.13689e+07	5.18292e+07	4.43147e+07	4.40025e+07	4.32104e+07	P02749	Beta-2-glycoprotein 1 (APC inhibitor) (Activated protein C-binding protein) (Anticardiolipin cofactor) (Apolipoprotein H) (Apo-H) (Beta-2-glycoprotein I) (B2GPI) (Beta(2)GPI)
sp|P02751|FINC_HUMAN	116288	128785	184081	140520	237655	116346	144120	105642	146754	241615	205485	86619.8	110617	240423	130745	P02751	Fibronectin (FN) (Cold-insoluble globulin) (CIG) [Cleaved into: Anastellin; Ugl-Y1; Ugl-Y2; Ugl-Y3]
sp|P02760|AMBP_HUMAN	3.39172e+06	4.19924e+06	3.43703e+06	2.87759e+06	2.82311e+06	2.79625e+06	3.26366e+06	3.3636e+06	4.2595e+06	3.41363e+06	3.23569e+06	3.18904e+06	2.44299e+06	3.23128e+06	2.3484e+06	P02760	Protein AMBP [Cleaved into: Alpha-1-microglobulin (Protein HC) (Alpha-1 microglycoprotein) (Complex-forming glycoprotein heterogeneous in charge); Inter-alpha-trypsin inhibitor light chain (ITI-LC) (Bikunin) (EDC1) (HI-30) (Uronic-acid-rich protein); Trypstatin]
sp|P02763|A1AG1_HUMAN	590.811	2336.54	906.101	1498.74	888.475	707.638	792.523	536.551	404.796	231.61	2145.46	3165.35	1905.55	2198.16	2692.02	P02763	Alpha-1-acid glycoprotein 1 (AGP 1) (Orosomucoid-1) (OMD 1)
sp|P02765|FETUA_HUMAN	1.18091e+07	1.16276e+07	1.14698e+07	1.0858e+07	1.12838e+07	1.05975e+07	1.31722e+07	1.37913e+07	1.37615e+07	1.04484e+07	9.95629e+06	9.86078e+06	1.03111e+07	1.0195e+07	1.00985e+07	P02765	Alpha-2-HS-glycoprotein (Alpha-2-Z-globulin) (Ba-alpha-2-glycoprotein) (Fetuin-A) [Cleaved into: Alpha-2-HS-glycoprotein chain A; Alpha-2-HS-glycoprotein chain B]
sp|P02766|TTHY_HUMAN	2170.62	3323.17	5934.42	1078.29	1353.64	426.996	351.182	1882.79	1987	1324.47	775.954	2366.67	1986.42	1449.02	1648.7	P02766	Transthyretin (ATTR) (Prealbumin) (TBPA)
sp|P02774|VTDB_HUMAN	9.39446e+07	9.06705e+07	9.11472e+07	9.4973e+07	9.73712e+07	9.52414e+07	8.39182e+07	8.76276e+07	8.81467e+07	8.80123e+07	8.75015e+07	8.71753e+07	8.68517e+07	8.73974e+07	8.53966e+07	P02774	Vitamin D-binding protein (DBP) (VDB) (Gc protein-derived macrophage activating factor) (Gc-MAF) (GcMAF) (Gc-globulin) (Group-specific component) (Gc) (Vitamin D-binding protein-macrophage activating factor) (DBP-maf)
sp|P02790|HEMO_HUMAN	1.90624e+08	1.91778e+08	1.96524e+08	2.00226e+08	1.95099e+08	1.97652e+08	1.93023e+08	1.84181e+08	1.91132e+08	1.94049e+08	2.05914e+08	2.05004e+08	1.98627e+08	2.02799e+08	2.04748e+08	P02790	Hemopexin (Beta-1B-glycoprotein)
sp|P03950|ANGI_HUMAN	76697.3	69510.6	99698.9	46293.9	91628.6	71724.4	76977.9	75867.3	76301	94014.9	65113.9	147315	68900.3	69340.8	59672.9	P03950	Angiogenin (EC 3.1.27.-) (Ribonuclease 5) (RNase 5)
sp|P03973|SLPI_HUMAN	6688.34	1110.77	4026.63	10957.7	14521.9	11838.4	6748.58	3569.93	2798.47	2330.4	8844	6795.2	8426.57	5658.29	7526.24	P03973	Antileukoproteinase (ALP) (BLPI) (HUSI-1) (Mucus proteinase inhibitor) (MPI) (Protease inhibitor WAP4) (Secretory leukocyte protease inhibitor) (Seminal proteinase inhibitor) (WAP four-disulfide core domain protein 4)
sp|P04075|ALDOA_HUMAN	2941.28	6935.31	5556.19	1469.44	4257.91	1015.42	853.958	1415.73	5372.4	2486.02	2311.83	2525.19	10358.7	1879.68	6043.43	P04075	Fructose-bisphosphate aldolase A (EC 4.1.2.13) (Lung cancer antigen NY-LU-1) (Muscle-type aldolase)
sp|P04180|LCAT_HUMAN	22905.7	6365.31	2350.14	5336.06	27368.8	31110.7	15147.4	18433.2	8105.89	34628.1	29387.3	35485.5	21888.5	22737.8	1656.17	P04180	Phosphatidylcholine-sterol acyltransferase (EC 2.3.1.43) (Lecithin-cholesterol acyltransferase) (Phospholipid-cholesterol acyltransferase)
sp|P04217|A1BG_HUMAN	3.14131e+07	3.09218e+07	3.2374e+07	2.11968e+07	2.14517e+07	2.09948e+07	3.10436e+07	3.2256e+07	3.11736e+07	2.33492e+07	2.35607e+07	2.29946e+07	3.02963e+07	3.01282e+07	3.02115e+07	P04217	Alpha-1B-glycoprotein (Alpha-1-B glycoprotein)
sp|P04275|VWF_HUMAN	96260.7	86249.6	77372	53054	60807.8	89565.1	53990	102162	68962.8	21268.1	131156	98725.5	117322	66993.9	65475.2	P04275	von Willebrand factor (vWF) [Cleaved into: von Willebrand antigen 2 (von Willebrand antigen II)]
sp|P04278|SHBG_HUMAN	22973.1	10042.8	17358.7	11826.5	11987.5	26936.4	4738.19	9018.46	2678.63	6479.12	16148.8	16302.9	7524.65	24086.8	13195.7	P04278	Sex hormone-binding globulin (SHBG) (Sex steroid-binding protein) (SBP) (Testis-specific androgen-binding protein) (ABP) (Testosterone-estradiol-binding globulin) (TeBG) (Testosterone-estrogen-binding globulin)
sp|P04406|G3P_HUMAN	1086.94	28978.7	28180.4	18879.5	812.017	2385.69	5773.78	28793.5	18204.8	3113.35	4963.59	16342.7	4210.11	24024.4	3867.86	P04406	Glyceraldehyde-3-phosphate dehydrogenase (GAPDH) (EC 1.2.1.12) (Peptidyl-cysteine S-nitrosylase GAPDH) (EC 2.6.99.-)
sp|P04745|AMY1_HUMAN	10754.2	14343.8	1706.48	18678.9	786.36	2162.98	1693.48	19511.7	1578.2	3741.42	830.669	11558.4	12152.9	54776.3	14989.3	P04745	Alpha-amylase 1 (EC 3.2.1.1) (1,4-alpha-D-glucan glucanohydrolase 1) (Salivary alpha-amylase)
sp|P05019|IGF1_HUMAN	75325.9	66485.3	55186.5	69446.4	63409.4	70660.5	41476.9	63299.2	59225.6	87401.8	77193.7	71045.6	72760.6	59780.1	59504.5	P05019	Insulin-like growth factor I (IGF-I) (Mechano growth factor) (MGF) (Somatomedin-C)
sp|P05160|F13B_HUMAN	1.65477e+06	1.53467e+06	1.56314e+06	1.3269e+06	1.38854e+06	1.20038e+06	1.23217e+06	1.33967e+06	1.30969e+06	1.60548e+06	1.55036e+06	1.53306e+06	1.22758e+06	1.25831e+06	1.20812e+06	P05160	Coagulation factor XIII B chain (Fibrin-stabilizing factor B subunit) (Protein-glutamine gamma-glutamyltransferase B chain) (Transglutaminase B chain)
sp|P05362|ICAM1_HUMAN	76727.3	82081.2	82087.5	64965.9	74443.2	68862.8	77595.1	74161.7	63853.7	70295.4	69449.6	71714.4	110085	83548.9	74556	P05362	Intercellular adhesion molecule 1 (ICAM-1) (Major group rhinovirus receptor) (CD antigen CD54)
sp|P05452|TETN_HUMAN	1.53401e+06	1.5089e+06	1.5817e+06	1.38471e+06	1.52862e+06	1.29815e+06	1.13247e+06	1.13546e+06	1.08885e+06	1.53686e+06	1.46039e+06	1.35536e+06	1.16332e+06	1.10431e+06	1.05572e+06	P05452	Tetranectin (TN) (C-type lectin domain family 3 member B) (Plasminogen kringle 4-binding protein)
sp|P05546|HEP2_HUMAN	121659	115555	6146.13	30695.8	79666.9	28852	97217.1	7595.46	7359.63	12786.2	17215.3	3697.64	4712.55	7020.86	8121.44	P05546	Heparin cofactor 2 (Heparin cofactor II) (HC-II) (Protease inhibitor leuserpin-2) (HLS2) (Serpin D1)
sp|P06276|CHLE_HUMAN	489460	473065	472660	454575	434616	422211	409378	458689	417680	427006	404909	428463	481758	495772	484142	P06276	Cholinesterase (EC 3.1.1.8) (Acylcholine acylhydrolase) (Butyrylcholine esterase) (Choline esterase II) (Pseudocholinesterase)
sp|P06396|GELS_HUMAN	29167.5	24456.5	19908.6	18521.1	29774.1	17526.7	21061.4	13837.6	13531.5	29819	23458.7	22755.1	19990	15276.1	20449.3	P06396	Gelsolin (AGEL) (Actin-depolymerizing factor) (ADF) (Brevin)
sp|P06681|CO2_HUMAN	50410.6	29081.1	61969.9	60784.9	76206	47565.4	46233.7	48250.3	36627	65049.5	59179.9	28422.8	36583.8	67286.9	44733.3	P06681	Complement C2 (EC 3.4.21.43) (C3/C5 convertase) [Cleaved into: Complement C2b fragment; Complement C2a fragment]
sp|P07225|PROS_HUMAN	63443.5	73415.7	47883.2	36446.2	60619.9	62604.7	94917.3	88996.4	62616.5	63860.4	89650.8	64491.4	45728.8	39073.4	70557.2	P07225	Vitamin K-dependent protein S
sp|P07339|CATD_HUMAN	49909.3	38943.7	52938.6	7817.05	17283.9	42592.1	3033.5	45797.6	2194.38	4202.66	40416.6	29259.9	46298.4	44784.6	46996.7	P07339	Cathepsin D (EC 3.4.23.5) [Cleaved into: Cathepsin D light chain; Cathepsin D heavy chain]
sp|P07357|CO8A_HUMAN	83011.4	58072.7	91479.7	234652	232778	82623.7	343908	30030.9	106203	176211	62921.5	79627.9	28058.4	64460.2	57652.7	P07357	Complement component C8 alpha chain (Complement component 8 subunit alpha)
sp|P07358|CO8B_HUMAN	76356.7	55212.4	106081	83275.7	77636	57809.9	47339.6	64459.2	54648	58261.2	82889.2	139771	60667.4	65931.5	77596	P07358	Complement component C8 beta chain (Complement component 8 subunit beta)
sp|P07359|GP1BA_HUMAN	49940.5	52153.4	49638.4	37728.3	40596.8	37306.7	50503.2	54470.8	56768.6	52881.3	51789.1	51228.1	49014.3	50029.9	53406.3	P07359	Platelet glycoprotein Ib alpha chain (GP-Ib alpha) (GPIb-alpha) (GPIbA) (Glycoprotein Ibalpha) (Antigen CD42b-alpha) (CD antigen CD42b) [Cleaved into: Glycocalicin]
sp|P07360|CO8G_HUMAN	40333.3	44158.5	19793.1	34820.4	24521	9060.89	35591.4	21723.4	43662.1	20902.6	56398.3	38745.2	11588.5	38491	65896.9	P07360	Complement component C8 gamma chain
sp|P07477|TRY1_HUMAN	4.98343e+06	6.39483e+06	4.77052e+06	2.67278e+06	3.84178e+06	5.13041e+06	5.11041e+06	5.8883e+06	4.14173e+06	6.54385e+06	3.68429e+06	6.36813e+06	6.17237e+06	4.03339e+06	5.64592e+06	P07477	Trypsin-1 (EC 3.4.21.4) (Beta-trypsin) (Cationic trypsinogen) (Serine protease 1) (Trypsin I) [Cleaved into: Alpha-trypsin chain 1; Alpha-trypsin chain 2]
sp|P07478|TRY2_HUMAN	3.80974e+06	6.4677e+06	3.33604e+06	3.17049e+06	3.54135e+06	5.20624e+06	6.64944e+06	5.29697e+06	3.61857e+06	5.60519e+06	4.50315e+06	6.4381e+06	6.54403e+06	3.90917e+06	5.11961e+06	P07478	Trypsin-2 (EC 3.4.21.4) (Anionic trypsinogen) (Serine protease 2) (Trypsin II)
sp|P07911|UROM_HUMAN	9546.92	8912.79	402.893	246.419	2807.79	1070.66	6455.77	6520.66	5204.59	361.038	11203.6	1356.33	339.663	10670.8	960.894	P07911	Uromodulin (Tamm-Horsfall urinary glycoprotein) (THP) [Cleaved into: Uromodulin, secreted form]
sp|P07996|TSP1_HUMAN	13212.8	10387.1	10899.2	7823.31	5968.06	2217.69	11983.9	5903.05	13892.7	8025.67	25750.8	7770.24	9489.26	10440.5	12495.7	P07996	Thrombospondin-1
sp|P07998|RNAS1_HUMAN	13816	16062.7	11024.5	12362.9	16389.7	16423.1	16198.2	2732.69	13118.9	15258.1	15044.5	7103.53	13553.4	13584.6	12505.7	P07998	Ribonuclease pancreatic (EC 3.1.27.5) (HP-RNase) (RIB-1) (RNase UpI-1) (Ribonuclease 1) (RNase 1) (Ribonuclease A) (RNase A)
sp|P08253|MMP2_HUMAN	21622.6	4356.89	3492.41	24274.1	2684.55	7112.76	24158.1	2919.16	23842.9	55681.3	12021.5	18068.7	20684.1	33528.2	20732.7	P08253	72 kDa type IV collagenase (EC 3.4.24.24) (72 kDa gelatinase) (Gelatinase A) (Matrix metalloproteinase-2) (MMP-2) (TBE-1) [Cleaved into: PEX]
sp|P08294|SODE_HUMAN	2715.48	8906.38	4399.38	7083.62	332.501	6488.66	10621.9	12789	14633.6	1605.82	2780.13	3019.55	7221.39	9128.14	8471.71	P08294	Extracellular superoxide dismutase [Cu-Zn] (EC-SOD) (EC 1.15.1.1)
sp|P08493|MGP_HUMAN	6416.67	11227.9	6363.7	5047.29	9270.92	1952.15	6106.4	5290.42	6910.56	3259.13	8757.44	9993.6	5909.96	347.3	187.645	P08493	Matrix Gla protein (MGP) (Cell growth-inhibiting gene 36 protein)
sp|P08519|APOA_HUMAN	53979	75892.8	59101.2	31483.4	55744.2	55841.6	68445.3	32996.3	48540.6	100069	40232.5	97877.7	66661.1	69776.7	40766.2	P08519	Apolipoprotein(a) (Apo(a)) (Lp(a)) (EC 3.4.21.-)
sp|P08567|PLEK_HUMAN	2703.59	9329.06	898.898	19543.4	1106.71	193.154	6430.68	705.683	1123.06	7338.94	2202.81	3102.99	1091.33	7352.89	2511.47	P08567	Pleckstrin (Platelet 47 kDa protein) (p47)
sp|P08571|CD14_HUMAN	22105.1	29026	12632.1	23727.1	33403.4	22717.3	27248.6	60045.2	37749	26386.1	40872.8	24023.6	41070.9	53774.7	27788.8	P08571	Monocyte differentiation antigen CD14 (Myeloid cell-specific leucine-rich glycoprotein) (CD antigen CD14) [Cleaved into: Monocyte differentiation antigen CD14, urinary form; Monocyte differentiation antigen CD14, membrane-bound form]
sp|P08603|CFAH_HUMAN	6.23673e+07	6.01423e+07	6.08912e+07	6.47161e+07	6.58782e+07	6.50304e+07	6.47624e+07	6.66157e+07	6.41997e+07	6.62309e+07	6.3044e+07	6.35039e+07	6.1419e+07	6.23016e+07	6.10844e+07	P08603	Complement factor H (H factor 1)
sp|P08637|FCG3A_HUMAN	77564.2	72380.3	80581.5	85078.2	78628.4	77896	64871	61876.5	62585.4	71951.1	69234.2	68118.9	82279.7	84651.7	84472.3	P08637	Low affinity immunoglobulin gamma Fc region receptor III-A (CD16a antigen) (Fc-gamma RIII-alpha) (Fc-gamma RIII) (Fc-gamma RIIIa) (FcRIII) (FcRIIIa) (FcR-10) (IgG Fc receptor III-2) (CD antigen CD16a)
sp|P09486|SPRC_HUMAN	4715.14	10526.9	3164.53	5773.15	5810.01	8465.61	11884.5	8426.99	4563.91	18512	6633.02	37258.8	4118.37	8545.87	45829.4	P09486	SPARC (Basement-membrane protein 40) (BM-40) (Osteonectin) (ON) (Secreted protein acidic and rich in cysteine)
sp|P09603|CSF1_HUMAN	1613.21	4397.92	4025.77	9682.62	204.837	3018.56	3801.25	2345.11	660.451	1632.82	1672.86	1097.71	1664.7	12957.5	646.381	P09603	Macrophage colony-stimulating factor 1 (CSF-1) (M-CSF) (MCSF) (Lanimostim) [Cleaved into: Processed macrophage colony-stimulating factor 1]
sp|P09871|C1S_HUMAN	85652.5	39833	58439.6	60345.1	62463.5	140620	108589	31707.5	82676	46515.8	59704.8	50642	51683.2	81428.9	53141.4	P09871	Complement C1s subcomponent (EC 3.4.21.42) (C1 esterase) (Complement component 1 subcomponent s) [Cleaved into: Complement C1s subcomponent heavy chain; Complement C1s subcomponent light chain]
sp|P0DJI8|SAA1_HUMAN	2396.19	1715.6	730.375	7789.87	26877.5	6490.38	19892.4	5902.19	21931.8	554.716	6101.1	3834.3	17017.5	782.769	17754.9	P0DJI8	Serum amyloid A-1 protein (SAA) [Cleaved into: Amyloid protein A (Amyloid fibril protein AA); Serum amyloid protein A(2-104); Serum amyloid protein A(3-104); Serum amyloid protein A(2-103); Serum amyloid protein A(2-102); Serum amyloid protein A(4-101)]
sp|P0DJI9|SAA2_HUMAN	1493.26	4078.61	1114.17	2575.77	1638.08	4641.85	2301.3	838.176	4152.12	1407.3	2243.15	1206.48	3358.58	1031.26	4793.9	P0DJI9	Serum amyloid A-2 protein (SAA2)
sp|P10451|OSTP_HUMAN	3003.1	3937.26	664.807	3032.3	3071.58	3921.76	4391.12	390.697	5191.42	1090.68	2285.71	4235.52	3709.17	1611.06	1058.7	P10451	Osteopontin (Bone sialoprotein 1) (Nephropontin) (Secreted phosphoprotein 1) (SPP-1) (Urinary stone protein) (Uropontin)
sp|P10643|CO7_HUMAN	43802.2	12761.7	70584.2	42444.9	29582.1	64662.3	53135.6	23460.3	51715.6	76979.6	88234.8	26448	76217.6	78793	77844.3	P10643	Complement component C7
sp|P11021|GRP78_HUMAN	648.721	4548.19	20366.2	8635.41	4889.25	8196.78	11815	2518.24	4443.74	7469.12	13069.6	4959.37	17740.7	20180.4	14163.1	P11021	78 kDa glucose-regulated protein (GRP-78) (Endoplasmic reticulum lumenal Ca(2+)-binding protein grp78) (Heat shock 70 kDa protein 5) (Immunoglobulin heavy chain-binding protein) (BiP)
sp|P11142|HSP7C_HUMAN	793.296	2912.44	1822.86	2133.11	1846.71	684.822	2469.96	3160.37	388.663	824.73	1491.8	456.5	1251.51	814.373	2490.87	P11142	Heat shock cognate 71 kDa protein (Heat shock 70 kDa protein 8) (Lipopolysaccharide-associated protein 1) (LAP-1) (LPS-associated protein 1)
sp|P11279|LAMP1_HUMAN	20913.5	16578.7	14198.2	12719.7	15927.6	13903.1	17933.6	16395.2	12881.7	7544.34	13733.7	14134.9	14589.1	19543.7	3123.86	P11279	Lysosome-associated membrane glycoprotein 1 (LAMP-1) (Lysosome-associated membrane protein 1) (CD107 antigen-like family member A) (CD antigen CD107a)
sp|P11362|FGFR1_HUMAN	1729.63	1055.24	7092.26	7534.95	8265.17	406.266	7784.79	5802.23	7553.54	1505.34	314.09	12673	878.772	10039.9	8649.3	P11362	Fibroblast growth factor receptor 1 (FGFR-1) (EC 2.7.10.1) (Basic fibroblast growth factor receptor 1) (BFGFR) (bFGF-R-1) (Fms-like tyrosine kinase 2) (FLT-2) (N-sam) (Proto-oncogene c-Fgr) (CD antigen CD331)
sp|P11684|UTER_HUMAN	4114.39	2637.57	198.67	33411.8	1259.99	10442.3	10150.3	5402.91	21756.4	8803.04	7720.7	2258.18	3563.7	2300.85	9486.67	P11684	Uteroglobin (Clara cell phospholipid-binding protein) (CCPBP) (Clara cells 10 kDa secretory protein) (CC10) (Secretoglobin family 1A member 1) (Urinary protein 1) (UP-1) (UP1) (Urine protein 1)
sp|P12259|FA5_HUMAN	73537.6	40961.5	86822	39098.8	78438.7	85912.5	36577.1	57417.9	123784	86848.8	66592.4	58401.7	29395.2	101329	79783.7	P12259	Coagulation factor V (Activated protein C cofactor) (Proaccelerin, labile factor) [Cleaved into: Coagulation factor V heavy chain; Coagulation factor V light chain]
sp|P12821|ACE_HUMAN	585.008	16336.7	13308.4	11547.5	13074.7	8040.85	6324.24	8312.45	1498.09	14757.8	6089.66	12952.9	8798.74	4904.79	5875.47	P12821	Angiotensin-converting enzyme (ACE) (EC 3.2.1.-) (EC 3.4.15.1) (Dipeptidyl carboxypeptidase I) (Kininase II) (CD antigen CD143) [Cleaved into: Angiotensin-converting enzyme, soluble form]
sp|P12830|CADH1_HUMAN	1097.89	1497.68	447.782	1478.15	2427.33	8965.91	11803.7	1127.2	429.82	1945.9	1135	2061.08	8004.52	12761.5	1822.59	P12830	Cadherin-1 (CAM 120/80) (Epithelial cadherin) (E-cadherin) (Uvomorulin) (CD antigen CD324) [Cleaved into: E-Cad/CTF1; E-Cad/CTF2; E-Cad/CTF3]
sp|P12955|PEPD_HUMAN	43265.9	45328	19188.4	34217.8	20389.1	15101.9	8322.22	6478.73	10383.4	2024.26	20494.6	32119.4	25092.8	42784.8	17102.2	P12955	Xaa-Pro dipeptidase (X-Pro dipeptidase) (EC 3.4.13.9) (Imidodipeptidase) (Peptidase D) (Proline dipeptidase) (Prolidase)
sp|P13473|LAMP2_HUMAN	1326.71	7837.63	11923.6	8671.44	10735.6	10640.9	7122.84	5662.7	6036	8328.44	3589.67	6803.99	6712.19	10182.4	6312.92	P13473	Lysosome-associated membrane glycoprotein 2 (LAMP-2) (Lysosome-associated membrane protein 2) (CD107 antigen-like family member B) (LGP-96) (CD antigen CD107b)
sp|P13598|ICAM2_HUMAN	84649.6	89775.1	96350	80989.9	87941.5	74092.3	81979.2	85800.2	81480	103412	67596.3	99730.6	70051.4	63424.7	73303.8	P13598	Intercellular adhesion molecule 2 (ICAM-2) (CD antigen CD102)
sp|P13647|K2C5_HUMAN	20763.8	2623.17	2785.28	3075.92	2649.31	5861.48	11815.6	8100.7	22410	5737.76	3188.85	4405.04	11917.3	15626.4	14067.2	P13647	Keratin, type II cytoskeletal 5 (58 kDa cytokeratin) (Cytokeratin-5) (CK-5) (Keratin-5) (K5) (Type-II keratin Kb5)
sp|P13987|CD59_HUMAN	13314	17716.3	17863.5	853.48	25808.9	8450.68	636.243	536.659	17566.3	8649.99	9093.13	5178.64	5020.18	13395.7	2010.44	P13987	CD59 glycoprotein (1F5 antigen) (20 kDa homologous restriction factor) (HRF-20) (HRF20) (MAC-inhibitory protein) (MAC-IP) (MEM43 antigen) (Membrane attack complex inhibition factor) (MACIF) (Membrane inhibitor of reactive lysis) (MIRL) (Protectin) (CD antigen CD59)
sp|P14151|LYAM1_HUMAN	423440	431421	400417	506643	514471	500683	369606	398476	391224	383647	396520	401790	363112	383495	380596	P14151	L-selectin (CD62 antigen-like family member L) (Leukocyte adhesion molecule 1) (LAM-1) (Leukocyte surface antigen Leu-8) (Leukocyte-endothelial cell adhesion molecule 1) (LECAM1) (Lymph node homing receptor) (TQ1) (gp90-MEL) (CD antigen CD62L)
sp|P14314|GLU2B_HUMAN	1213.5	8606.31	7377.18	1304.45	377.613	491.476	3869.35	744.943	454.053	445.183	7894.48	10998.2	2295.39	11886.9	2047.94	P14314	Glucosidase 2 subunit beta (80K-H protein) (Glucosidase II subunit beta) (Protein kinase C substrate 60.1 kDa protein heavy chain) (PKCSH)
sp|P14618|KPYM_HUMAN	10776.4	25609.1	20470	29220.7	32120.1	3276.02	22782.4	10975.4	2655.6	38940.7	14115.1	35406.4	25050	32866.8	35412.6	P14618	Pyruvate kinase PKM (EC 2.7.1.40) (Cytosolic thyroid hormone-binding protein) (CTHBP) (Opa-interacting protein 3) (OIP-3) (Pyruvate kinase 2/3) (Pyruvate kinase muscle isozyme) (Thyroid hormone-binding protein 1) (THBP1) (Tumor M2-PK) (p58)
sp|P15151|PVR_HUMAN	31690.1	14176.8	15260	3871.43	11704.7	10654.6	5880.23	18881.5	17761.1	16600.4	12225.1	10369.5	28963.2	15167.1	19929.3	P15151	Poliovirus receptor (Nectin-like protein 5) (NECL-5) (CD antigen CD155)
sp|P15169|CBPN_HUMAN	75834.4	123802	108013	110991	89687.7	111928	102831	21560.2	85763.5	90929.3	166837	104183	105626	98432.4	78170	P15169	Carboxypeptidase N catalytic chain (CPN) (EC 3.4.17.3) (Anaphylatoxin inactivator) (Arginine carboxypeptidase) (Carboxypeptidase N polypeptide 1) (Carboxypeptidase N small subunit) (Kininase-1) (Lysine carboxypeptidase) (Plasma carboxypeptidase B) (Serum carboxypeptidase N) (SCPN)
sp|P16070|CD44_HUMAN	457776	397452	436603	451152	476635	441116	401787	385636	433358	411907	459294	428961	445672	462530	429232	P16070	CD44 antigen (CDw44) (Epican) (Extracellular matrix receptor III) (ECMR-III) (GP90 lymphocyte homing/adhesion receptor) (HUTCH-I) (Heparan sulfate proteoglycan) (Hermes antigen) (Hyaluronate receptor) (Phagocytic glycoprotein 1) (PGP-1) (Phagocytic glycoprotein I) (PGP-I) (CD antigen CD44)
sp|P16581|LYAM2_HUMAN	114262	116485	101891	139736	132048	137983	100664	104035	103030	85352.1	110930	109674	105353	102207	107763	P16581	E-selectin (CD62 antigen-like family member E) (Endothelial leukocyte adhesion molecule 1) (ELAM-1) (Leukocyte-endothelial cell adhesion molecule 2) (LECAM2) (CD antigen CD62E)
sp|P17936|IBP3_HUMAN	1.2778e+06	1.27383e+06	975483	843657	876442	853306	795331	788861	754694	1.06991e+06	1.16416e+06	957858	1.15696e+06	784557	752634	P17936	Insulin-like growth factor-binding protein 3 (IBP-3) (IGF-binding protein 3) (IGFBP-3)
sp|P18065|IBP2_HUMAN	102983	183709	102244	135033	145692	175743	132618	61465.8	91494.9	183589	92384.8	194264	59289.1	215276	66404.1	P18065	Insulin-like growth factor-binding protein 2 (IBP-2) (IGF-binding protein 2) (IGFBP-2)
sp|P18136|KV313_HUMAN	105445	106903	114413	96933.9	110478	3049.9	89359.7	81133.7	951.936	146790	4426.74	1736.42	492.368	135832	127382	P18136	Merged into P01619.
sp|P19022|CADH2_HUMAN	61131.6	23272.6	52488	36643.2	5827.83	17181.1	23071.1	22297.3	41880.6	21831.9	76882	64967.1	31446.6	25889.5	23892.9	P19022	Cadherin-2 (CDw325) (Neural cadherin) (N-cadherin) (CD antigen CD325)
sp|P19320|VCAM1_HUMAN	6811.74	2423.63	3246.06	5330.85	7806.78	2693.54	3545.72	4021.08	5658.38	2904.66	3701.37	8106.04	3483.15	3594.78	2236.1	P19320	Vascular cell adhesion protein 1 (V-CAM 1) (VCAM-1) (INCAM-100) (CD antigen CD106)
sp|P19823|ITIH2_HUMAN	37729.3	29940.8	32191.7	60320.3	59835.1	50420.9	44572.4	24278	54583.2	57356.9	51264.6	35114.7	66237.2	71740.7	19882.9	P19823	Inter-alpha-trypsin inhibitor heavy chain H2 (ITI heavy chain H2) (ITI-HC2) (Inter-alpha-inhibitor heavy chain 2) (Inter-alpha-trypsin inhibitor complex component II) (Serum-derived hyaluronan-associated protein) (SHAP)
sp|P19827|ITIH1_HUMAN	324250	58890.7	277954	56607.2	322144	307612	360652	80170.7	136372	157179	347400	166271	308081	163479	274621	P19827	Inter-alpha-trypsin inhibitor heavy chain H1 (ITI heavy chain H1) (ITI-HC1) (Inter-alpha-inhibitor heavy chain 1) (Inter-alpha-trypsin inhibitor complex component III) (Serum-derived hyaluronan-associated protein) (SHAP)
sp|P20742|PZP_HUMAN	81068.2	63090.8	112277	100665	3340.31	18487.8	5085.25	57827.5	37629.7	13916.9	58643.7	5604.62	15215.8	14057.6	6950.06	P20742	Pregnancy zone protein (C3 and PZP-like alpha-2-macroglobulin domain-containing protein 6)
sp|P20774|MIME_HUMAN	6350.99	8617.9	9897.23	14075.7	4166.3	7752.42	16043.5	16075.5	5336.47	25034.7	11165.7	30506.8	7661.75	5044.72	3653.87	P20774	Mimecan (Osteoglycin) (Osteoinductive factor) (OIF)
sp|P21333|FLNA_HUMAN	10224.1	3414.92	4260.59	4777.87	595.655	2697.72	5054.73	2070.09	3295.64	2109.13	10524	1442.69	257.307	884.812	3328.71	P21333	Filamin-A (FLN-A) (Actin-binding protein 280) (ABP-280) (Alpha-filamin) (Endothelial actin-binding protein) (Filamin-1) (Non-muscle filamin)
sp|P22692|IBP4_HUMAN	81926.5	114712	73507.6	128105	139315	130989	53080	124939	90505.1	111737	113846	94645.1	57224.1	126667	64907.3	P22692	Insulin-like growth factor-binding protein 4 (IBP-4) (IGF-binding protein 4) (IGFBP-4)
sp|P23142|FBLN1_HUMAN	178436	80504.6	116350	170514	59692	159287	113737	94203.3	201242	218759	130213	192059	183007	204695	189499	P23142	Fibulin-1 (FIBL-1)
sp|P23470|PTPRG_HUMAN	11081.8	6515.54	14325.1	948.086	11192.2	9616.91	9494.85	1147.1	11972.2	1687.96	9908.67	1052.15	5921.69	10296.3	7328.9	P23470	Receptor-type tyrosine-protein phosphatase gamma (Protein-tyrosine phosphatase gamma) (R-PTP-gamma) (EC 3.1.3.48)
sp|P23528|COF1_HUMAN	727.292	1101.63	2716.74	1102.05	961.017	491.248	1123.93	3378.6	997.948	1907.85	5049.91	2532.52	18551.5	5028.89	510.361	P23528	Cofilin-1 (18 kDa phosphoprotein) (p18) (Cofilin, non-muscle isoform)
sp|P24592|IBP6_HUMAN	39851	45382.2	52346.7	33828	47586.2	37373.7	24999.1	19161.1	45177.2	59433.4	54514.4	41816.7	35354.5	32041.8	27255.8	P24592	Insulin-like growth factor-binding protein 6 (IBP-6) (IGF-binding protein 6) (IGFBP-6)
sp|P24593|IBP5_HUMAN	24323.6	15971.3	16953.3	20441.6	19379.3	21640.9	9094.8	15831.1	14802.6	17265.7	21151.9	22949.1	15057.7	5459.67	21899	P24593	Insulin-like growth factor-binding protein 5 (IBP-5) (IGF-binding protein 5) (IGFBP-5)
sp|P25311|ZA2G_HUMAN	284153	252372	294218	218405	300157	264467	280487	294227	242686	274791	263293	202221	307657	293944	302866	P25311	Zinc-alpha-2-glycoprotein (Zn-alpha-2-GP) (Zn-alpha-2-glycoprotein)
sp|P26572|MGAT1_HUMAN	2044.11	30315	4936.68	22413.5	6860.65	43765.9	7104.07	30678	28667	6915.82	2168.4	8590.31	18918.1	33309.6	22403.7	P26572	Alpha-1,3-mannosyl-glycoprotein 2-beta-N-acetylglucosaminyltransferase (EC 2.4.1.101) (N-glycosyl-oligosaccharide-glycoprotein N-acetylglucosaminyltransferase I) (GNT-I) (GlcNAc-T I)
sp|P26927|HGFL_HUMAN	118604	126099	104151	72767.9	147229	130393	121913	111499	123797	129719	130460	97596.8	79314.4	179515	103733	P26927	Hepatocyte growth factor-like protein (Macrophage stimulatory protein) (Macrophage-stimulating protein) (MSP) [Cleaved into: Hepatocyte growth factor-like protein alpha chain; Hepatocyte growth factor-like protein beta chain]
sp|P27169|PON1_HUMAN	21545.4	33394.3	29607.9	34181.4	7456.76	43161.7	9868.85	20660	16251.1	46823.7	52153.9	43072.8	23787.1	51900.9	6266.53	P27169	Serum paraoxonase/arylesterase 1 (PON 1) (EC 3.1.1.2) (EC 3.1.1.81) (EC 3.1.8.1) (Aromatic esterase 1) (A-esterase 1) (K-45) (Serum aryldialkylphosphatase 1)
sp|P29622|KAIN_HUMAN	5256.49	2695.84	1844.63	831.223	256.072	5770.92	7548.3	2870.17	1056.05	536.115	3067.78	4965.99	3048.05	4848.12	5881.68	P29622	Kallistatin (Kallikrein inhibitor) (Peptidase inhibitor 4) (PI-4) (Serpin A4)
sp|P30101|PDIA3_HUMAN	2284.84	2693.37	1846.35	1492.13	54203.2	45321.2	15925.6	1498.27	3042.96	744.239	4613.34	2812.46	2659.8	830.587	10563.3	P30101	Protein disulfide-isomerase A3 (EC 5.3.4.1) (58 kDa glucose-regulated protein) (58 kDa microsomal protein) (p58) (Disulfide isomerase ER-60) (Endoplasmic reticulum resident protein 57) (ER protein 57) (ERp57) (Endoplasmic reticulum resident protein 60) (ER protein 60) (ERp60)
sp|P32119|PRDX2_HUMAN	2818.86	1472.24	2902.32	10481.7	1711.78	11492.8	7103.28	3813.03	12145.6	4566.2	2620.62	5163.94	2047.76	1574.34	1218.59	P32119	Peroxiredoxin-2 (EC 1.11.1.15) (Natural killer cell-enhancing factor B) (NKEF-B) (PRP) (Thiol-specific antioxidant protein) (TSA) (Thioredoxin peroxidase 1) (Thioredoxin-dependent peroxide reductase 1)
sp|P32942|ICAM3_HUMAN	8936.84	2909.12	7155.58	9226.35	12854.5	7467.35	9238.18	5578.43	10495.3	488.409	14123.2	6938.09	6273.62	9520.07	3518.16	P32942	Intercellular adhesion molecule 3 (ICAM-3) (CDw50) (ICAM-R) (CD antigen CD50)
sp|P33151|CADH5_HUMAN	6598.09	5035.67	10876.7	17733.1	3983.99	9060.57	12287.6	3822.16	11840	20616.3	15029.6	6911.55	2764.59	4134.54	9033.58	P33151	Cadherin-5 (7B4 antigen) (Vascular endothelial cadherin) (VE-cadherin) (CD antigen CD144)
sp|P35443|TSP4_HUMAN	5569.79	3386.28	5421.95	6038.42	11387.8	8510.64	2911.86	12257.1	8599.2	10684.7	23524.4	5221.09	3919	22231.1	5301.73	P35443	Thrombospondin-4
sp|P35542|SAA4_HUMAN	49499.9	22351.2	1590.42	34767.8	15175.5	26005.7	19718.6	15072.6	17839.1	48948.9	26267.9	7010.01	44619.5	5667.57	23378	P35542	Serum amyloid A-4 protein (Constitutively expressed serum amyloid A protein) (C-SAA)
sp|P35555|FBN1_HUMAN	183.286	342.279	5856.68	1583.19	2798.53	2230.23	15792	15913.3	1239.57	2122.64	17095.7	17066.8	17846.4	9380.72	1279.02	P35555	Fibrillin-1 [Cleaved into: Asprosin]
sp|P35858|ALS_HUMAN	1.27119e+06	1.32645e+06	1.28523e+06	980473	1.05035e+06	1.00279e+06	995628	915269	938397	1.27343e+06	1.3106e+06	1.22818e+06	1.36082e+06	1.39913e+06	1.32744e+06	P35858	Insulin-like growth factor-binding protein complex acid labile subunit (ALS)
sp|P35916|VGFR3_HUMAN	1333.33	23487.9	1918.9	22398.4	24708.7	23939.7	6429.62	22800.5	4567.76	20544.7	23205.2	12033.8	17964.2	1524.09	18801.4	P35916	Vascular endothelial growth factor receptor 3 (VEGFR-3) (EC 2.7.10.1) (Fms-like tyrosine kinase 4) (FLT-4) (Tyrosine-protein kinase receptor FLT4)
sp|P36980|FHR2_HUMAN	1.33667e+06	1.33589e+06	1.28203e+06	1.29471e+06	1.31367e+06	1.28665e+06	1.12058e+06	1.12171e+06	1.17195e+06	1.4092e+06	1.38007e+06	1.43064e+06	1.25007e+06	1.31083e+06	1.29238e+06	P36980	Complement factor H-related protein 2 (FHR-2) (DDESK59) (H factor-like 3) (H factor-like protein 2)
sp|P37802|TAGL2_HUMAN	4612.29	3054.68	6193.36	5117.77	21968.8	26654.9	2332.86	16013.1	14063.4	6381.95	29514.7	23282.2	4664.83	1252.39	25455.8	P37802	Transgelin-2 (Epididymis tissue protein Li 7e) (SM22-alpha homolog)
sp|P41222|PTGDS_HUMAN	148894	103534	157825	101983	102872	108297	101009	117252	101497	300477	132350	203691	56830.9	155046	139310	P41222	Prostaglandin-H2 D-isomerase (EC 5.3.99.2) (Beta-trace protein) (Cerebrin-28) (Glutathione-independent PGD synthase) (Lipocalin-type prostaglandin-D synthase) (Prostaglandin-D2 synthase) (PGD2 synthase) (PGDS) (PGDS2)
sp|P43121|MUC18_HUMAN	103330	106839	78325.1	71811.1	64786	91364.6	73411.9	74955.5	83954.9	91783.1	58143.5	91651	65423.9	66643.7	73225.2	P43121	Cell surface glycoprotein MUC18 (Cell surface glycoprotein P1H12) (Melanoma cell adhesion molecule) (Melanoma-associated antigen A32) (Melanoma-associated antigen MUC18) (S-endo 1 endothelial-associated antigen) (CD antigen CD146)
sp|P43251|BTD_HUMAN	121748	132862	128836	160795	176263	153796	120721	127682	120531	157075	143958	140901	139675	141000	134317	P43251	Biotinidase (Biotinase) (EC 3.5.1.12)
sp|P43652|AFAM_HUMAN	1.60918e+07	1.59862e+07	1.59831e+07	1.48885e+07	1.45142e+07	1.4831e+07	1.41305e+07	1.46346e+07	1.42947e+07	1.38977e+07	1.37306e+07	1.3737e+07	1.41681e+07	1.38239e+07	1.37857e+07	P43652	Afamin (Alpha-albumin) (Alpha-Alb)
sp|P46087|NOP2_HUMAN	1809.37	5391.77	246.429	1264.39	2479.98	835.611	1780.68	1518.21	2539.89	2324.63	1899.28	371.396	1719.9	1047.11	728.899	P46087	Probable 28S rRNA (cytosine(4447)-C(5))-methyltransferase (EC 2.1.1.-) (Nucleolar protein 1) (Nucleolar protein 2 homolog) (Proliferating-cell nucleolar antigen p120) (Proliferation-associated nucleolar protein p120)
sp|P46531|NOTC1_HUMAN	2220.03	427.118	1674.06	4146.19	2942.32	7431.16	1123.53	1596.54	539.907	544.773	2319.16	623.161	2999.23	2813.34	1320.38	P46531	Neurogenic locus notch homolog protein 1 (Notch 1) (hN1) (Translocation-associated notch protein TAN-1) [Cleaved into: Notch 1 extracellular truncation (NEXT); Notch 1 intracellular domain (NICD)]
sp|P48740|MASP1_HUMAN	4910.12	2565.46	10976.4	14154.8	2492.9	2947.74	5323.33	3336.98	10874.2	20119.5	16642.8	14231.1	11365.9	7386.34	7383.08	P48740	Mannan-binding lectin serine protease 1 (EC 3.4.21.-) (Complement factor MASP-3) (Complement-activating component of Ra-reactive factor) (Mannose-binding lectin-associated serine protease 1) (MASP-1) (Mannose-binding protein-associated serine protease) (Ra-reactive factor serine protease p100) (RaRF) (Serine protease 5) [Cleaved into: Mannan-binding lectin serine protease 1 heavy chain; Mannan-bi…
sp|P49747|COMP_HUMAN	45048.2	40276.9	27842.5	52165.2	52101.7	45849.2	49601.6	34544.4	8659.35	26224	4534.19	20773.3	21664.6	24362.7	22984.1	P49747	Cartilage oligomeric matrix protein (COMP) (Thrombospondin-5) (TSP5)
sp|P49908|SEPP1_HUMAN	792953	216669	581762	473830	418712	249819	555326	253650	276087	653834	487608	453084	147335	550581	485236	P49908	Selenoprotein P (SeP)
sp|P51608|MECP2_HUMAN	2362.99	39777.9	4199.03	774.432	2700.97	1841.83	7730.99	2867.62	15576.7	29103	6347.25	1301.54	9919.19	2694.62	3705.22	P51608	Methyl-CpG-binding protein 2 (MeCp-2 protein) (MeCp2)
sp|P52209|6PGD_HUMAN	20919.6	22690.1	2435.48	35267.5	3555.85	36234.2	23957.8	35716.7	18649.4	26469.8	1976.86	25058.6	33252	35254.9	2930.65	P52209	6-phosphogluconate dehydrogenase, decarboxylating (EC 1.1.1.44)
sp|P54108|CRIS3_HUMAN	4326.87	4360.59	1655.41	14659.3	6062.56	10935.8	4269.26	1239.9	7945.5	598.41	6536.55	1099.71	6858.42	1690.09	2556.21	P54108	Cysteine-rich secretory protein 3 (CRISP-3) (Specific granule protein of 28 kDa) (SGP28)
sp|P54289|CA2D1_HUMAN	18404.7	19646.6	22745.7	24492.2	26227.7	18516.6	15894.5	22384.9	14344.5	13127.4	10273.9	28558.4	22806.6	12270.9	13475.5	P54289	Voltage-dependent calcium channel subunit alpha-2/delta-1 (Voltage-gated calcium channel subunit alpha-2/delta-1) [Cleaved into: Voltage-dependent calcium channel subunit alpha-2-1; Voltage-dependent calcium channel subunit delta-1]
sp|P55058|PLTP_HUMAN	5883.42	1279.27	1731.09	2085.07	5382.43	4191.26	1724.31	4188.78	240.471	1077.84	779.222	4663.99	1242.16	4089.5	871.061	P55058	Phospholipid transfer protein (Lipid transfer protein II)
sp|P55285|CADH6_HUMAN	5996	41728.6	34885.8	46416.4	8547.77	63652.2	62476.3	45516.6	19633	53850.5	6020.66	47206	11279.7	19048.6	15756.3	P55285	Cadherin-6 (Kidney cadherin) (K-cadherin)
sp|P55290|CAD13_HUMAN	1817.11	2050.67	1020.86	202.166	1668.64	1557.96	1856.08	1771.1	1417.22	1008.12	1392.81	1493.4	281.712	1366.52	812.998	P55290	Cadherin-13 (Heart cadherin) (H-cadherin) (P105) (Truncated cadherin) (T-cad) (T-cadherin)
sp|P59666|DEF3_HUMAN	38161.5	19581.6	143903	98517.1	132418	2512.77	49689.1	212382	54105.8	14532.7	136016	2601.8	24637.7	19299.3	128109	P59666	Neutrophil defensin 3 (Defensin, alpha 3) (HNP-3) (HP-3) (HP3) [Cleaved into: HP 3-56; Neutrophil defensin 2 (HNP-2) (HP-2) (HP2)]
sp|P60709|ACTB_HUMAN	4636.97	1114.03	3179.79	13470.5	3123.08	5766.39	1101.96	8334.59	2532.43	2836.98	484.052	11011	156.922	10607.9	9336.83	P60709	Actin, cytoplasmic 1 (Beta-actin) [Cleaved into: Actin, cytoplasmic 1, N-terminally processed]
sp|P61626|LYSC_HUMAN	300649	311854	311073	334841	360264	336825	235010	286886	290930	300443	271863	232070	239967	246428	243617	P61626	Lysozyme C (EC 3.2.1.17) (1,4-beta-N-acetylmuramidase C)
sp|P62937|PPIA_HUMAN	26234.9	2034.65	6327.38	13561.4	826.88	5963.07	7366.26	9579.34	11345.4	12773.7	7661.95	8906.03	7346.39	3188.41	5239.98	P62937	Peptidyl-prolyl cis-trans isomerase A (PPIase A) (EC 5.2.1.8) (Cyclophilin A) (Cyclosporin A-binding protein) (Rotamase A) [Cleaved into: Peptidyl-prolyl cis-trans isomerase A, N-terminally processed]
sp|P63261|ACTG_HUMAN	4212.64	1658.11	3026.53	19782.9	3009.32	3167.28	1134.9	938.246	959.951	2662.82	2948.25	2404.76	1168.46	1261.57	5337.89	P63261	Actin, cytoplasmic 2 (Gamma-actin) [Cleaved into: Actin, cytoplasmic 2, N-terminally processed]
sp|P67936|TPM4_HUMAN	4963.08	11296.9	23080.1	29913.9	21486.5	18179	38074.6	7698.38	23861.2	23543.1	7926.7	12727.7	13724.5	22266.3	9827.08	P67936	Tropomyosin alpha-4 chain (TM30p1) (Tropomyosin-4)
sp|P68871|HBB_HUMAN	35747.5	5535.69	39650.1	14659.1	8986.94	3400.91	7950.72	14417.6	7834.86	39686.3	13407	12198.9	18071.5	13424.7	16414.7	P68871	Hemoglobin subunit beta (Beta-globin) (Hemoglobin beta chain) [Cleaved into: LVV-hemorphin-7; Spinorphin]
sp|P69905|HBA_HUMAN	3556.24	4721.52	1678.91	3865.21	1412.2	4350.75	1243.5	2549.97	2365.61	2099.95	4341.56	2520.47	3143.34	4144.44	1162.82	P69905	Hemoglobin subunit alpha (Alpha-globin) (Hemoglobin alpha chain)
sp|P80108|PHLD_HUMAN	9759.47	41664.4	25793.8	28549.6	19418	29641.6	25833	6816.3	7721.51	66449.6	31703.7	86322.7	14164.1	85341.1	59522.9	P80108	Phosphatidylinositol-glycan-specific phospholipase D (PI-G PLD) (EC 3.1.4.50) (Glycoprotein phospholipase D) (Glycosyl-phosphatidylinositol-specific phospholipase D) (GPI-PLD) (GPI-specific phospholipase D)
sp|P80723|BASP1_HUMAN	639.459	2601.36	3247.37	1044.52	2145.86	2616.05	2016.22	201.289	2264.12	2559.61	3134.2	1120.61	3383.08	2649.84	961.775	P80723	Brain acid soluble protein 1 (22 kDa neuronal tissue-enriched acidic protein) (Neuronal axonal membrane protein NAP-22)
sp|P98160|PGBM_HUMAN	13825	29437.6	6017.97	6692.83	5547.53	4542.53	30171.2	7281.97	10582	5520.44	6364.54	6252.37	22855.8	30309.6	4578.32	P98160	Basement membrane-specific heparan sulfate proteoglycan core protein (HSPG) (Perlecan) (PLC) [Cleaved into: Endorepellin; LG3 peptide]
sp|Q02985|FHR3_HUMAN	55142.4	72102.1	64459.7	65533.9	50160.7	63831.6	80655.7	80149	86581.9	75497.9	66755.7	75763.9	81141.6	88187.6	82664.9	Q02985	Complement factor H-related protein 3 (FHR-3) (DOWN16) (H factor-like protein 3)
sp|Q03591|FHR1_HUMAN	1.19832e+06	1.17113e+06	1.19069e+06	945554	1.04392e+06	1.01482e+06	875735	986337	931441	1.32919e+06	1.3474e+06	1.33663e+06	1.20357e+06	1.16251e+06	1.17652e+06	Q03591	Complement factor H-related protein 1 (FHR-1) (H factor-like protein 1) (H-factor-like 1) (H36)
sp|Q04756|HGFA_HUMAN	900150	897214	979732	793165	757596	805064	894447	930899	921969	785502	828464	835274	839749	887189	853560	Q04756	Hepatocyte growth factor activator (HGF activator) (HGFA) (EC 3.4.21.-) [Cleaved into: Hepatocyte growth factor activator short chain; Hepatocyte growth factor activator long chain]
sp|Q07954|LRP1_HUMAN	1648.16	15261.4	947.131	11105.2	3691.65	3952.8	1610	12553.8	14231.3	5256.11	14463.1	12957.9	6491.32	13087.8	405.489	Q07954	Prolow-density lipoprotein receptor-related protein 1 (LRP-1) (Alpha-2-macroglobulin receptor) (A2MR) (Apolipoprotein E receptor) (APOER) (CD antigen CD91) [Cleaved into: Low-density lipoprotein receptor-related protein 1 85 kDa subunit (LRP-85); Low-density lipoprotein receptor-related protein 1 515 kDa subunit (LRP-515); Low-density lipoprotein receptor-related protein 1 intracellular domain (L…
sp|Q08830|FGL1_HUMAN	8907.66	23047.2	3473.12	6679.51	4304.83	4800.59	17410.6	13829	4186.52	24539.2	19282.2	16079.5	5098.92	11862.3	20876.9	Q08830	Fibrinogen-like protein 1 (HP-041) (Hepassocin) (Hepatocyte-derived fibrinogen-related protein 1) (HFREP-1) (Liver fibrinogen-related protein 1) (LFIRE-1)
sp|Q10588|BST1_HUMAN	8858.77	12571.4	1249.72	11076.8	8918.34	11221.7	710.81	1462.19	10767.6	3801.72	8053.11	13138.8	8922.96	3186.04	13221.7	Q10588	ADP-ribosyl cyclase/cyclic ADP-ribose hydrolase 2 (EC 3.2.2.6) (ADP-ribosyl cyclase 2) (Bone marrow stromal antigen 1) (BST-1) (Cyclic ADP-ribose hydrolase 2) (cADPr hydrolase 2) (CD antigen CD157)
sp|Q12805|FBLN3_HUMAN	29782.5	17983.9	20994.4	36797.2	20843.8	33205.3	12518.8	25366.5	40405.6	29016.6	34432.8	21401.1	26611.8	40459.4	23953.1	Q12805	EGF-containing fibulin-like extracellular matrix protein 1 (Extracellular protein S1-5) (Fibrillin-like protein) (Fibulin-3) (FIBL-3)
sp|Q12841|FSTL1_HUMAN	6208.98	7000.21	3917.26	4855.12	822.41	1035.42	736.161	5842.07	5963.99	7332.32	6134.28	5276.55	5457.25	2118.83	7072.47	Q12841	Follistatin-related protein 1 (Follistatin-like protein 1)
sp|Q12913|PTPRJ_HUMAN	8367.21	6316.09	2773.31	7246.96	6855.88	6677.17	727.725	6351.34	1847.15	6375.21	490.322	7513.11	6610.59	7850.22	5147.52	Q12913	Receptor-type tyrosine-protein phosphatase eta (Protein-tyrosine phosphatase eta) (R-PTP-eta) (EC 3.1.3.48) (Density-enhanced phosphatase 1) (DEP-1) (HPTP eta) (Protein-tyrosine phosphatase receptor type J) (R-PTP-J) (CD antigen CD148)
sp|Q13201|MMRN1_HUMAN	1275.71	20313.9	22138.7	965.534	2092.4	231.586	415.784	2664.74	2233	4286.74	2334.86	15533	10710	1235.35	2311.19	Q13201	Multimerin-1 (EMILIN-4) (Elastin microfibril interface located protein 4) (Elastin microfibril interfacer 4) (Endothelial cell multimerin) [Cleaved into: Platelet glycoprotein Ia*; 155 kDa platelet multimerin (p-155) (p155)]
sp|Q13275|SEM3F_HUMAN	978.998	1463.93	1573.69	1734.72	4487.03	386.08	1587.72	267.112	177.149	1004.39	1708.15	653.708	2113.71	1253.7	560.015	Q13275	Semaphorin-3F (Sema III/F) (Semaphorin IV) (Sema IV)
sp|Q13363|CTBP1_HUMAN	578695	295418	2806	283916	363113	4148.77	5216.45	2875.3	324264	5707.79	569912	3629.03	255291	318038	292776	Q13363	C-terminal-binding protein 1 (CtBP1) (EC 1.1.1.-)
sp|Q14118|DAG1_HUMAN	10446.1	1694.25	11646.4	10594.1	2401.94	2482.16	2671.82	1575.56	776.772	9298.85	2445.1	1401.31	1426.28	7376.99	11312.7	Q14118	Dystroglycan (Dystrophin-associated glycoprotein 1) [Cleaved into: Alpha-dystroglycan (Alpha-DG); Beta-dystroglycan (Beta-DG)]
sp|Q14156|EFR3A_HUMAN	25222.4	25707.1	1421.35	6660.75	3862.14	2855.46	3638.34	49441.4	2392.88	26144.6	23200	29705.1	36373.8	35514.6	34084.9	Q14156	Protein EFR3 homolog A (Protein EFR3-like)
sp|Q14515|SPRL1_HUMAN	16141.7	8247.1	14010	6206.76	9107.39	29570.9	19683	14310.7	5708.34	11344.9	7099.13	5898.23	5513.45	29490.3	12193	Q14515	SPARC-like protein 1 (High endothelial venule protein) (Hevin) (MAST 9)
sp|Q14624|ITIH4_HUMAN	186637	346415	223620	133652	141212	175444	142725	157193	123793	178548	179726	96935.8	164625	275602	178427	Q14624	Inter-alpha-trypsin inhibitor heavy chain H4 (ITI heavy chain H4) (ITI-HC4) (Inter-alpha-inhibitor heavy chain 4) (Inter-alpha-trypsin inhibitor family heavy chain-related protein) (IHRP) (Plasma kallikrein sensitive glycoprotein 120) (Gp120) (PK-120) [Cleaved into: 70 kDa inter-alpha-trypsin inhibitor heavy chain H4; 35 kDa inter-alpha-trypsin inhibitor heavy chain H4]
sp|Q14766|LTBP1_HUMAN	1690.85	772.057	1621.6	3704.89	813.182	4096.3	860.37	6300.69	4603.84	225.359	1231.99	1319.78	1356.18	2930.01	1922.65	Q14766	Latent-transforming growth factor beta-binding protein 1 (LTBP-1) (Transforming growth factor beta-1-binding protein 1) (TGF-beta1-BP-1)
sp|Q15063|POSTN_HUMAN	284717	170915	301969	237793	191803	275433	290282	8784.97	14149.7	156707	193167	220940	257270	257281	52913.4	Q15063	Periostin (PN) (Osteoblast-specific factor 2) (OSF-2)
sp|Q15113|PCOC1_HUMAN	1836.55	19562.1	18749.8	2792.78	21889.9	5625.09	23176.5	16796.4	3403.28	17760	3713.57	15953.9	3787.74	2423.63	2406.09	Q15113	Procollagen C-endopeptidase enhancer 1 (Procollagen COOH-terminal proteinase enhancer 1) (PCPE-1) (Procollagen C-proteinase enhancer 1) (Type 1 procollagen C-proteinase enhancer protein) (Type I procollagen COOH-terminal proteinase enhancer)
sp|Q15582|BGH3_HUMAN	966.24	2329.45	2425.61	1568.42	1951.72	2608.86	3763.6	1968.12	536.299	2818.28	1222.36	1860.01	1397.13	2390.37	799.449	Q15582	Transforming growth factor-beta-induced protein ig-h3 (Beta ig-h3) (Kerato-epithelin) (RGD-containing collagen-associated protein) (RGD-CAP)
sp|Q16270|IBP7_HUMAN	9912.54	8577.57	10992.3	16559.7	3546.51	5678.14	7813.51	26988.5	10009.4	9646.72	13290.6	13728.1	16608.4	2136.4	21545.3	Q16270	Insulin-like growth factor-binding protein 7 (IBP-7) (IGF-binding protein 7) (IGFBP-7) (IGFBP-rP1) (MAC25 protein) (PGI2-stimulating factor) (Prostacyclin-stimulating factor) (Tumor-derived adhesion factor) (TAF)
sp|Q16473|TENXA_HUMAN	9575.97	6521.58	13809.6	3746.53	10514.1	1181.07	5716.71	8012.97	9140.43	9931.36	10944.9	12593.8	8759.29	1772.4	6640.29	Q16473	Putative tenascin-XA (TN-XA)
sp|Q16610|ECM1_HUMAN	1.53123e+06	1.60025e+06	1.517e+06	1.59536e+06	1.84898e+06	1.68867e+06	1.3484e+06	1.40792e+06	1.39698e+06	1.63568e+06	1.59235e+06	1.49984e+06	1.33008e+06	1.42649e+06	1.3784e+06	Q16610	Extracellular matrix protein 1 (Secretory component p85)
sp|Q6EMK4|VASN_HUMAN	3468.51	22407.3	26637.7	21943	27636.4	2916.01	4151.72	2705.8	5019.22	4504.71	3477.49	22602.6	5242.26	2312.2	3048.7	Q6EMK4	Vasorin (Protein slit-like 2)
sp|Q6UXB8|PI16_HUMAN	103735	137368	123313	83841.8	141812	88372.5	68174	85510.5	80706.2	88058	90137.1	51470.6	45200.9	92685	59251.6	Q6UXB8	Peptidase inhibitor 16 (PI-16) (Cysteine-rich secretory protein 9) (CRISP-9) (PSP94-binding protein)
sp|Q6UXS9|CASPC_HUMAN	586126	564150	627858	527756	564161	546605	350309	574498	603559	710462	661360	490445	551017	547469	540209	Q6UXS9	Inactive caspase-12 (CASP-12)
sp|Q6UY14|ATL4_HUMAN	7769.14	11292.9	14616.4	6674.44	10199	2171.92	6335	14867.2	7423.38	19973.9	11334	8188.61	5414.92	20713	5848.51	Q6UY14	ADAMTS-like protein 4 (ADAMTSL-4) (Thrombospondin repeat-containing protein 1)
sp|Q76LX8|ATS13_HUMAN	18925.8	18751.7	15838	17471.8	24505.1	3608.92	19856.6	14440.2	19226.5	22104.6	9504.5	27473.1	34159	29978.7	12706.1	Q76LX8	A disintegrin and metalloproteinase with thrombospondin motifs 13 (ADAM-TS 13) (ADAM-TS13) (ADAMTS-13) (EC 3.4.24.87) (von Willebrand factor-cleaving protease) (vWF-CP) (vWF-cleaving protease)
sp|Q7Z7G0|TARSH_HUMAN	18268.6	20210.5	20543.3	20345.7	21996.6	23065.1	24258.7	17069.1	18960.9	9753.03	22632.7	21912.9	14372.4	21103.3	18322.3	Q7Z7G0	Target of Nesh-SH3 (Tarsh) (ABI gene family member 3-binding protein) (Nesh-binding protein) (NeshBP)
sp|Q86UN3|R4RL2_HUMAN	2013.16	1869.69	1288.6	2475.34	6069.97	3395.33	4244.36	1799.26	2812.84	2694.65	7045.15	5748.9	1779.72	3472.64	1980.82	Q86UN3	Reticulon-4 receptor-like 2 (Nogo receptor-like 3) (Nogo-66 receptor homolog 1) (Nogo-66 receptor-related protein 2) (NgR2)
sp|Q86VB7|C163A_HUMAN	221906	227593	247126	262545	266586	301132	271568	287649	286428	246443	248841	224535	252057	258930	220069	Q86VB7	Scavenger receptor cysteine-rich type 1 protein M130 (Hemoglobin scavenger receptor) (CD antigen CD163) [Cleaved into: Soluble CD163 (sCD163)]
sp|Q86YS7|C2CD5_HUMAN	991.184	1439.29	6052.28	4712.72	4866.23	1132.22	3914.48	4729.43	3331.98	5196	3321.36	3554.78	714.282	805.363	1564.92	Q86YS7	C2 domain-containing protein 5 (C2 domain-containing phosphoprotein of 138 kDa)
sp|Q8IXL6|DMP4_HUMAN	1362.73	67104.5	45803.1	3431.31	41607.9	4151.24	16033.7	1822.16	19036.1	13809.8	8441.03	87589.2	2947.65	1288.55	4577.47	Q8IXL6	Extracellular serine/threonine protein kinase FAM20C (EC 2.7.11.1) (Dentin matrix protein 4) (DMP-4) (Golgi casein kinase) (Golgi-enriched fraction casein kinase) (GEF-CK)
sp|Q8IXM7|OD3L1_HUMAN	1.55004e+06	1.79022e+06	1.62007e+06	1.37126e+06	1.67004e+06	1.56238e+06	1.33011e+06	1.28169e+06	1.25933e+06	1.56302e+06	1.5067e+06	1.5802e+06	1.36632e+06	1.58165e+06	1.59715e+06	Q8IXM7	Outer dense fiber protein 3-like protein 1
sp|Q8IZQ5|SELH_HUMAN	420.989	498.747	376.317	1580.93	336.843	399.265	1058.61	800.137	546.031	735.246	140.139	282.307	1421.27	1011.42	330.014	Q8IZQ5	Selenoprotein H (SelH)
sp|Q8NBP7|PCSK9_HUMAN	899.162	781.862	4350.94	6126.64	3729.41	2760.3	6720.06	300.505	6636.78	1080.42	4610.44	2853.66	1163.13	1772.97	1490.35	Q8NBP7	Proprotein convertase subtilisin/kexin type 9 (EC 3.4.21.-) (Neural apoptosis-regulated convertase 1) (NARC-1) (Proprotein convertase 9) (PC9) (Subtilisin/kexin-like protease PC9)
sp|Q8NI99|ANGL6_HUMAN	4744.98	3678.01	1076.49	511.889	7006.17	720.976	461.792	915.158	992.613	1847.65	4562.96	1381.6	3282.27	162.973	2425.75	Q8NI99	Angiopoietin-related protein 6 (Angiopoietin-like protein 6) (Angiopoietin-related growth factor) (Angiopoietin-related protein 5)
sp|Q8WWZ8|OIT3_HUMAN	626.679	679.199	5221.67	1780.66	1104.51	20680.9	939.43	30681.9	32240.2	2020.74	40284.6	1213.78	40253.4	44645.3	37016.9	Q8WWZ8	Oncoprotein-induced transcript 3 protein (Liver-specific zona pellucida domain-containing protein)
sp|Q92496|FHR4_HUMAN	27503.4	2930.74	2557.31	4000.02	32104.4	955.543	24803.8	1862.99	4679.3	1506.84	37485.4	2370.2	26268.4	4221.66	30380.2	Q92496	Complement factor H-related protein 4 (FHR-4)
sp|Q92954|PRG4_HUMAN	263749	280852	234887	341084	341195	278054	233504	236455	247151	323570	211786	185071	230213	212805	210665	Q92954	Proteoglycan 4 (Lubricin) (Megakaryocyte-stimulating factor) (Superficial zone proteoglycan) [Cleaved into: Proteoglycan 4 C-terminal part]
sp|Q96EE4|CC126_HUMAN	3667	3426.43	2587.64	6504.15	3634.76	3633.06	1504.1	2019.26	3216.45	5415.54	3183.39	4407.54	3625.17	928.554	1893.61	Q96EE4	Coiled-coil domain-containing protein 126
sp|Q96KG7|MEG10_HUMAN	441.944	12720.9	4051.62	7253.2	2468.39	14254	12075.6	11601.8	1409.28	14999	13977.6	1820.06	13346.7	15698.1	16277	Q96KG7	Multiple epidermal growth factor-like domains protein 10 (Multiple EGF-like domains protein 10)
sp|Q96KM6|Z512B_HUMAN	2728.62	61299	1109.86	85191.6	39366.1	2295.3	41190.6	47959.6	45213.2	7479.14	5901.81	2290.39	47073.6	51109.3	50690.6	Q96KM6	Zinc finger protein 512B
sp|Q96KN2|CNDP1_HUMAN	29740.3	36634.4	2305.52	21157.1	26854.5	24373	25506.9	25636.9	17116.4	49075.9	41718.6	38035.9	4697.88	42298.1	40129.1	Q96KN2	Beta-Ala-His dipeptidase (EC 3.4.13.20) (CNDP dipeptidase 1) (Carnosine dipeptidase 1) (Glutamate carboxypeptidase-like protein 2) (Serum carnosinase)
sp|Q96LB3|IFT74_HUMAN	7.26827e+06	8.7436e+06	9.49575e+06	1.12546e+07	6.39305e+06	1.1203e+07	1.00064e+07	7.61931e+06	7.42397e+06	1.10937e+07	1.39297e+07	1.41519e+07	1.13475e+07	8.68184e+06	1.09706e+07	Q96LB3	Intraflagellar transport protein 74 homolog (Capillary morphogenesis gene 1 protein) (CMG-1) (Coiled-coil domain-containing protein 2)
sp|Q96NZ9|PRAP1_HUMAN	12811.1	7564.18	8147.75	3777.2	14461.5	5222.62	10644.4	8959.59	9303.15	14656.8	11772	1975.86	4133.27	129.88	10879.2	Q96NZ9	Proline-rich acidic protein 1 (Epididymis tissue protein Li 178) (Uterine-specific proline-rich acidic protein)
sp|Q96PD5|PGRP2_HUMAN	120920	93912.5	47879.7	142892	124039	135709	186340	106908	51006	73759.5	175000	95840.5	83436.2	99810	115648	Q96PD5	N-acetylmuramoyl-L-alanine amidase (EC 3.5.1.28) (Peptidoglycan recognition protein 2) (Peptidoglycan recognition protein long) (PGRP-L)
sp|Q99453|PHX2B_HUMAN	4512.93	62231.7	81641.6	54097	61495	56588.1	29438.8	44266	33658.2	79881.3	47854.6	2235.35	51431.7	50294.2	57167	Q99453	Paired mesoderm homeobox protein 2B (Neuroblastoma Phox) (NBPhox) (PHOX2B homeodomain protein) (Paired-like homeobox 2B)
sp|Q99747|SNAG_HUMAN	1290.21	3011.83	2230.43	5214.72	2263.7	1268.74	787.942	663.344	1137.53	1734.33	1649.05	962.752	375.253	2776.71	662.149	Q99747	Gamma-soluble NSF attachment protein (SNAP-gamma) (N-ethylmaleimide-sensitive factor attachment protein gamma)
sp|Q99941|ATF6B_HUMAN	1899.17	18137.6	336.455	1926.53	1040.06	1288.98	22105.5	3421.56	781.376	15903.1	1002.37	1435.59	2126.7	1000.15	18826.3	Q99941	Cyclic AMP-dependent transcription factor ATF-6 beta (cAMP-dependent transcription factor ATF-6 beta) (Activating transcription factor 6 beta) (ATF6-beta) (Protein G13) (cAMP response element-binding protein-related protein) (Creb-rp) (cAMP-responsive element-binding protein-like 1) [Cleaved into: Processed cyclic AMP-dependent transcription factor ATF-6 beta]
sp|Q9BSJ5|CQ080_HUMAN	14759	19041.7	2554.21	14210	12608.5	19834.2	25871	23926.4	23070.4	29124.5	28072.9	27890.8	23781.3	26628.9	18065	Q9BSJ5	Uncharacterized protein C17orf80 (Cell migration-inducing gene 3 protein) (Human lung cancer oncogene 8 protein) (HLC-8)
sp|Q9BT25|HAUS8_HUMAN	4908.71	2804.51	11903.2	5193.47	2266.78	9966.87	10914.5	23557.6	1889.65	1223.99	1195.49	2280.31	13813.3	4563.18	1461.94	Q9BT25	HAUS augmin-like complex subunit 8 (HEC1/NDC80-interacting centrosome-associated protein 1) (Sarcoma antigen NY-SAR-48)
sp|Q9BUN1|MENT_HUMAN	5731.75	7020.97	880.776	4585.61	200.351	5391.83	7303.83	4672.16	3186.26	2559.45	5824.8	2256.7	6552.14	5429.75	2225.81	Q9BUN1	Protein MENT (Methylated in normal thymocytes protein)
sp|Q9BWP8|COL11_HUMAN	1669.43	16899.8	8760.52	1707.38	771.422	12362.7	2091.88	554.501	2102.54	15893.4	18584.1	15278.7	8140.59	6785.29	6035.51	Q9BWP8	Collectin-11 (Collectin kidney protein 1) (CL-K1)
sp|Q9BXR6|FHR5_HUMAN	132479	144968	135664	92100.3	106666	91715.3	142774	164437	172371	147159	133979	139215	121881	288713	119493	Q9BXR6	Complement factor H-related protein 5 (FHR-5)
sp|Q9H1U4|MEGF9_HUMAN	15799.5	15218.9	14021.4	7791.78	8121.72	3889.06	9463.26	13472	17092.7	8602.25	17005.7	5769.94	6525.51	9533.54	7839.5	Q9H1U4	Multiple epidermal growth factor-like domains protein 9 (Multiple EGF-like domains protein 9) (Epidermal growth factor-like protein 5) (EGF-like protein 5)
sp|Q9H8L6|MMRN2_HUMAN	7663.38	17195.2	15761.1	14653.2	8855.38	15234.5	15871.2	16348	12365.5	12429.3	14644.1	15443.3	11486.8	17783.5	12755.5	Q9H8L6	Multimerin-2 (EMILIN-3) (Elastin microfibril interface located protein 3) (Elastin microfibril interfacer 3) (EndoGlyx-1 p125/p140 subunit)
sp|Q9HCU0|CD248_HUMAN	11967	11318.4	2303.41	6598.16	9870.48	2643.44	10463.4	2812.94	2207.27	1073.05	10517.6	8149.16	388.385	5846.48	9316.06	Q9HCU0	Endosialin (Tumor endothelial marker 1) (CD antigen CD248)
sp|Q9NPH3|IL1AP_HUMAN	12775.8	17240.4	18954.2	13550.3	3069.46	11180.7	18085.4	15286	12975	6610.91	24082	16707.7	14768.2	5349.28	12434.2	Q9NPH3	Interleukin-1 receptor accessory protein (IL-1 receptor accessory protein) (IL-1RAcP) (Interleukin-1 receptor 3) (IL-1R-3) (IL-1R3)
sp|Q9NPY3|C1QR1_HUMAN	23251	24222.6	31368.3	24881.2	24683.1	25521.9	13139.9	20073.3	27688.6	22757.4	27882.7	27063.8	22930.5	31886.4	19868.5	Q9NPY3	Complement component C1q receptor (C1q/MBL/SPA receptor) (C1qR) (C1qR(p)) (C1qRp) (CDw93) (Complement component 1 q subcomponent receptor 1) (Matrix-remodeling-associated protein 4) (CD antigen CD93)
sp|Q9NQ38|ISK5_HUMAN	6334.09	500.455	5459.05	3962.34	418.444	1415.79	7071.91	9643.21	13340.7	460.286	563.562	9295.15	7784.58	276.768	8504.41	Q9NQ38	Serine protease inhibitor Kazal-type 5 (Lympho-epithelial Kazal-type-related inhibitor) (LEKTI) [Cleaved into: Hemofiltrate peptide HF6478; Hemofiltrate peptide HF7665]
sp|Q9NQ79|CRAC1_HUMAN	43891.8	59119.6	19731.9	25387.5	38929	35121.4	28812.2	34477.8	24337.9	38772.2	79645.6	38251.1	28546.5	20772.2	50022.7	Q9NQ79	Cartilage acidic protein 1 (68 kDa chondrocyte-expressed protein) (CEP-68) (ASPIC)
sp|Q9NZP8|C1RL_HUMAN	82870.4	46136.8	66774.9	90863.8	28680.1	77735.1	82733.8	105973	48527.2	68896.8	42646.8	97702.8	109902	33650.4	75872.1	Q9NZP8	Complement C1r subcomponent-like protein (C1r-LP) (C1r-like protein) (EC 3.4.21.-) (C1r-like serine protease analog protein) (CLSPa)
sp|Q9UBG0|MRC2_HUMAN	432.074	2335.5	975.938	2045.28	1572.89	1274.92	337.807	179.166	1531.09	540.187	980.504	2542.39	823.201	1178.11	1176.61	Q9UBG0	C-type mannose receptor 2 (C-type lectin domain family 13 member E) (Endocytic receptor 180) (Macrophage mannose receptor 2) (Urokinase-type plasminogen activator receptor-associated protein) (UPAR-associated protein) (Urokinase receptor-associated protein) (CD antigen CD280)
sp|Q9UBR2|CATZ_HUMAN	14003.8	14108.3	2336.49	12566	11889.2	1523.64	10146.6	15155.4	11834.7	1971.42	10835.4	1088.79	11895.9	10563.7	9894.81	Q9UBR2	Cathepsin Z (EC 3.4.18.1) (Cathepsin P) (Cathepsin X)
sp|Q9UGM5|FETUB_HUMAN	37747.4	47525.6	54205.9	28026.4	42477.2	58449.9	40268.7	37255.8	51115.1	81296.4	86416.2	51749.8	12967.7	67833.3	65522.4	Q9UGM5	Fetuin-B (16G2) (Fetuin-like protein IRL685) (Gugu)
sp|Q9UJJ9|GNPTG_HUMAN	1596.75	2037.3	2482.89	9027.9	1277.72	9597.46	5391.57	6301.61	3826.22	9828.17	9817.92	2609.87	1500.84	618.759	14660.1	Q9UJJ9	N-acetylglucosamine-1-phosphotransferase subunit gamma (GlcNAc-1-phosphotransferase subunit gamma) (UDP-N-acetylglucosamine-1-phosphotransferase subunit gamma)
sp|Q9UK55|ZPI_HUMAN	13940.9	4562.86	13602.2	9447.64	18234.5	17272.1	5505.85	16823.2	3937.3	4616.3	16075.8	24758.9	16226.5	11882	7872.12	Q9UK55	Protein Z-dependent protease inhibitor (PZ-dependent protease inhibitor) (PZI) (Serpin A10)
sp|Q9UM47|NOTC3_HUMAN	25253.4	2921.94	2124.27	1713.67	2529.27	10248.5	29912.8	1971.83	2058.42	993.14	1406.26	3364.71	596.084	1576.89	1108.9	Q9UM47	Neurogenic locus notch homolog protein 3 (Notch 3) [Cleaved into: Notch 3 extracellular truncation; Notch 3 intracellular domain]
sp|Q9UNW1|MINP1_HUMAN	200466	22675.9	181129	2444.83	14260	134508	18865.3	97009.1	8958.35	171556	183100	169341	178322	17654.2	9236.4	Q9UNW1	Multiple inositol polyphosphate phosphatase 1 (EC 3.1.3.62) (2,3-bisphosphoglycerate 3-phosphatase) (2,3-BPG phosphatase) (EC 3.1.3.80) (Inositol (1,3,4,5)-tetrakisphosphate 3-phosphatase) (Ins(1,3,4,5)P(4) 3-phosphatase)
sp|Q9Y2K3|MYH15_HUMAN	17324	598248	418997	22674.2	608171	644203	17510.7	931292	669328	9681.66	14979.8	359161	668310	15310.4	566732	Q9Y2K3	Myosin-15 (Myosin heavy chain 15)
sp|Q9Y490|TLN1_HUMAN	8923.4	6975.85	133302	122149	115333	7496.65	17216.8	174551	179122	26676.2	109629	11202.6	113332	119167	104529	Q9Y490	Talin-1
sp|Q9Y574|ASB4_HUMAN	17008.4	16376.5	17933.5	15567.8	17225.7	19306.9	19653.1	19435.3	20785.9	17620.2	16977.6	14148.4	14084.9	12589.9	425.66	Q9Y574	Ankyrin repeat and SOCS box protein 4 (ASB-4)
sp|Q9Y5Y7|LYVE1_HUMAN	161242	170593	163961	154514	140860	143633	75148.8	121866	144211	156545	145124	138121	135475	144989	170425	Q9Y5Y7	Lymphatic vessel endothelial hyaluronic acid receptor 1 (LYVE-1) (Cell surface retention sequence-binding protein 1) (CRSBP-1) (Extracellular link domain-containing protein 1) (Hyaluronic acid receptor)
sp|Q9Y646|CBPQ_HUMAN	5250.04	3859.02	1967.68	3322.93	1469.66	3509.78	1842.06	2447.03	2874.44	674.554	2691.65	4540.24	3852.21	5258.22	5167.69	Q9Y646	Carboxypeptidase Q (EC 3.4.17.-) (Lysosomal dipeptidase) (Plasma glutamate carboxypeptidase)
sp|Q9Y6R7|FCGBP_HUMAN	55088.8	101021	115040	54387.6	61432	23343.6	41910.7	68675.2	114252	67523.3	109740	61685.9	46027.7	80606.5	136181	Q9Y6R7	IgGFc-binding protein (Fcgamma-binding protein antigen) (FcgammaBP)
sp|Q9Y6Z7|COL10_HUMAN	994.615	930.481	33829.6	1443.59	29630	37777.4	18196.3	17548.8	2005.65	51944.6	2807.57	2267.74	636.875	28363.3	4038.37	Q9Y6Z7	Collectin-10 (Collectin liver protein 1) (CL-L1) (Collectin-34) (CL-34)

## Sheet: API-MARS14
Protein	Control-1	Control-2	Control-3	stage I-1	stage I-2	stage I-3	stage II-1	stage II-2	stage II-3	stage III-1	stage III-2	stage III-3	stage IV-1	stage IV-2	stage IV-3	Uniprot ID
sp|A1L4H1|SRCRL_HUMAN	1092.21	853.989	2318.48	2630.27	1493.14	2530.01	1070.7	1271.65	1472.17	1266.93	1335.3	869.965	2133.66	3345.44	1967.8	A1L4H1
sp|O00187|MASP2_HUMAN	1706.5	3550.7	11620.6	5206.05	1729.05	4556.13	3959.58	3279.82	5140.46	4130.91	1572.61	13622.5	4201.07	5773.13	23427.4	O00187
sp|P02763|A1AG1_HUMAN	195.553	529.508	565.218	413.687	418.202	257.038	306.182	551.769	1039.93	402.648	686.452	372.962	930.614	512.488	1791.32	P02763
sp|P18428|LBP_HUMAN	17176.3	2143.15	2724.7	10355.3	4421.62	3242.25	4198.08	5132.53	8140.27	9934.19	5589.44	2631.05	8877.25	6805.24	5167.74	P18428
sp|P35542|SAA4_HUMAN	2161.57	2584.49	514.841	1336.12	948.565	7258.52	2441.65	3077.08	3821.01	1545.78	3234.01	1237.25	3274.04	3091.38	2568.28	P35542
sp|P80108|PHLD_HUMAN	17821.1	34150.9	23405.1	4554.25	34464	9461.24	17226.7	11046.2	28314.3	29830	22935.7	21279.5	25020.3	25938.5	13997.4	P80108
sp|Q96BY6|DOC10_HUMAN	1554.37	989.402	790.386	637.024	653.312	4900.99	3299.86	2595.71	2317.28	2176.44	1145.29	416.477	5504.13	2216.85	3156.21	Q96BY6
sp|O00391|QSOX1_HUMAN	1586.64	1354.66	2497.64	2956.79	4396.12	2025.72	2569.75	4183.02	3161.2	2941.18	2690.08	1818.31	2794.96	5706.98	4945.88	O00391
sp|O15204|ADEC1_HUMAN	276.27	259.256	432.377	1087.4	1185.57	1518.96	1054.35	1557.81	1171.46	2129.43	901.696	1496.1	1167.47	856.276	463.075	O15204
sp|O95445|APOM_HUMAN	5167.84	11507.2	8394.59	6186.07	3245.47	2816.84	3118.02	2837.1	17063.9	4093.75	2955.01	3053.44	4340.72	2758.09	4619.1	O95445
sp|P00738|HPT_HUMAN	59779.4	55934.5	79917.2	67986.8	65494.8	78372.9	60789.6	55089.2	83130.7	90001.5	70510.4	78245.4	58004.3	51573	56370.8	P00738
sp|P00739|HPTR_HUMAN	49962.7	43048.1	57857.6	20292.6	15552.1	24101.5	32366.4	34775.3	32703.9	50841.9	59503	54099.1	50240.9	49003	62621.9	P00739
sp|P01008|ANT3_HUMAN	102228	64744.5	75512.3	72380.6	73930.8	63149	44161.6	48334.4	62171.5	110642	87215.8	87076.6	85426.7	57848.7	90773.5	P01008
sp|P01009|A1AT_HUMAN	9797.44	12963.5	10253.6	12952.9	15964.7	14847	22252.2	16207.7	19549.3	16379.4	11340.5	11880.8	15321.9	7514.9	13602.4	P01009
sp|P01023|A2MG_HUMAN	28344.3	22635.4	31825.6	38767.1	33803.1	49464.4	38144.2	47560.4	31550.5	44905	40532.3	23711.3	26523.2	42822.8	40229.9	P01023
sp|P01024|CO3_HUMAN	257377	336646	194079	120666	64604.8	152426	116648	199012	113182	219049	105408	231320	54958.3	100226	212092	P01024
sp|P01031|CO5_HUMAN	24295.7	31441.1	37864.9	53148.6	44990.6	78962.1	43552	34873.6	32242.6	39534.4	48685.3	38615.3	33308.8	38560.9	38334.1	P01031
sp|P01034|CYTC_HUMAN	48370.6	50004.5	9900.73	3060.35	4533.39	5421.46	4464.81	3159.59	8898.04	3350.1	3334.2	7362.66	3734.66	2053.28	3163.15	P01034
sp|P01344|IGF2_HUMAN	11788.1	17096.1	3996.93	5498.82	4531.99	6869.47	4260.29	5976.32	12350.9	5791.27	9998.52	12087.8	4211.7	3842.96	5159.66	P01344
sp|P01591|IGJ_HUMAN	16953.8	13867.7	29318.9	13089.8	22007.9	17949.8	34969.2	32924.3	41118.5	44654.5	20873	27941.5	10348.5	22511.4	22164	P01591
sp|P01834|IGKC_HUMAN	3505.23	2036.42	3733.44	7138.79	10569	3841.76	7071.37	7868.47	7754.07	5753.77	1227.3	3502.64	4858.45	8405.36	5538.41	P01834
sp|P01859|IGHG2_HUMAN	33255.7	12846.3	21444	4599.83	12245.8	9915.26	14137.9	12100.9	5552.43	26942.6	5312.13	4705.85	19001.9	26447.6	13332.3	P01859
sp|P01860|IGHG3_HUMAN	12980.3	5382.07	22182.5	6737.51	19648.9	32831	20242.4	15157	24964	14756.7	21286.6	20547.7	19474.5	32618.7	24110.6	P01860
sp|P01871|IGHM_HUMAN	4656.93	5517.08	5676.07	5039.58	12834.3	16758.2	9293.91	6550.5	11897.9	7880.14	5633.31	5236.97	4672.75	8824.22	4711.36	P01871
sp|P01876|IGHA1_HUMAN	55742.9	26410.3	40378.5	58307.1	65004.5	62134.7	101591	39716.8	53835.9	59261.8	63955.4	58916.7	24735.4	66248.3	80308.5	P01876
sp|P01877|IGHA2_HUMAN	2008.38	4058.09	2625.99	1597.19	4895.3	7328.98	1167.75	1120.32	2960.3	4740.9	3906.91	4664.35	2733.9	6688.87	7165.26	P01877
sp|P02647|APOA1_HUMAN	67242.3	51698.1	69013.4	68737.5	138503	68233.9	39301.3	53764.8	50477.3	217725	165893	220496	77128.5	33150.8	96401.7	P02647
sp|P02649|APOE_HUMAN	87585.6	107216	66949.6	73978.2	47765.8	57025.8	65235.2	76454.7	48914.1	78215.8	40854.6	57616.7	34038	32713	67178.1	P02649
sp|P02652|APOA2_HUMAN	43242.6	46058.7	66563.9	138697	160321	129202	81581.7	109626	116932	57883.5	70516.5	64222.9	25885.7	50485.5	35985.2	P02652
sp|P02655|APOC2_HUMAN	12915.1	7088.17	6752.65	12532.3	18753.3	26554.5	16062.6	30949	12282.7	36146.5	42345.6	30757.8	12481.3	29752.3	15561.3	P02655
sp|P02656|APOC3_HUMAN	22972.1	65333	31278.4	50994.9	47876.6	77120.8	33908.4	33351.2	35919.9	34078	33427.6	50153.1	135052	70171.7	30519.8	P02656
sp|P02671|FIBA_HUMAN	87348.4	72798.3	99164	103026	41185.3	70819.6	98356.8	82441.9	91905.1	201980	110259	168733	86856.8	112845	104294	P02671
sp|P02675|FIBB_HUMAN	620527	501475	418870	491610	406837	415076	583426	630973	700919	528472	479985	512748	767261	706652	717476	P02675
sp|P02679|FIBG_HUMAN	13537.6	15287.5	17449.1	13805.3	9602.36	21644.2	13759.4	17508.4	7216.25	26314.3	12919.5	12692.3	17158.6	20016	10878.6	P02679
sp|P02747|C1QC_HUMAN	57328.4	62848.5	10397	3201.62	4526.46	3722.58	7185.76	26017.5	11865.7	6096.2	51604.3	4884.31	14016.2	11495.8	10057.4	P02747
sp|P02748|CO9_HUMAN	123649	144624	135001	79850.3	103318	77311.5	81742.7	38878.2	53230.5	51007.9	32174.7	89409.8	119732	98935.3	86642.7	P02748
sp|P02750|A2GL_HUMAN	47370.1	59340.7	46266.6	47993.2	26936.2	29155.1	29210.6	50879.7	61348.4	72084.6	33694	58718.6	68137.9	51815.7	87444.9	P02750
sp|P02760|AMBP_HUMAN	2.35436e+06	2.4408e+06	226714	97730.6	121381	151082	254927	90498.8	141618	263637	270559	203953	97744.3	147237	85875.8	P02760
sp|P02768|ALBU_HUMAN	152263	150282	168364	92643.1	91998.8	52575	93304.8	137095	144537	2.34454e+06	2.34865e+06	2.23139e+06	208898	121322	180283	P02768
sp|P02786|TFR1_HUMAN	1783.4	1383.56	479.856	4777.29	6537.97	3724.03	235.43	931.678	6363.16	1543.57	2539.12	3423.97	1628.77	611.265	438.481	P02786
sp|P02787|TRFE_HUMAN	120249	86214.6	58854.8	88947.3	88442.4	138562	171843	187021	78387.5	342449	118014	306065	117580	128000	138223	P02787
sp|P03952|KLKB1_HUMAN	91212.4	67258.4	107875	107652	151422	58380.7	108465	90414.2	156944	132797	121868	70763.1	121814	134449	100959	P03952
sp|P04196|HRG_HUMAN	30794.1	67403	58521.1	56548.7	59023	46058.9	21495.3	63496	49009.5	41151.4	83278.5	50918.1	42613.3	45470.5	43771.1	P04196
sp|P04220|MUCB_HUMAN	1388.68	2045.97	4759.4	2465.19	936.339	12324	428.967	2308.39	1659.49	6192.48	1598.56	1033.73	4356.4	3325.03	2870.63	P04220
sp|P05452|TETN_HUMAN	9842.56	5797.35	22928.2	9595.94	9437	24509.2	10275	4886.32	10740.4	27668.8	11885.3	5960.01	10941.8	6030.42	10236.4	P05452
sp|P05543|THBG_HUMAN	586.64	983.413	459.872	1127.8	424.224	420.001	1218.51	551.759	1143.84	1231.96	833.174	853.905	376.703	445.594	462.999	P05543
sp|P05546|HEP2_HUMAN	6031.36	7379.56	17648.7	7603.83	10501.6	19795.1	9324.5	8528.8	14009.3	12559.8	10471.4	20244.1	12408.4	12500.6	17173.4	P05546
sp|P07225|PROS_HUMAN	8578.6	12506.2	20772.2	30316.6	19997.8	32272.7	26344.5	12607.3	30854.9	14440.8	12808.9	13657.2	29673.7	27215.1	32109.7	P07225
sp|P07358|CO8B_HUMAN	44153.7	41712.9	45153.1	40041.7	84526.6	49299.5	37218.2	51572.9	55755.6	29179.5	36644.4	31994.6	33972.3	29511	38057.5	P07358
sp|P08185|CBG_HUMAN	22202.9	16711.5	15270.6	2357.04	2157.56	4088.15	1988.4	7636.46	8120.95	2046.24	7508.57	2479.44	4671.63	8854.28	11391.8	P08185
sp|P08571|CD14_HUMAN	1443.96	11112.2	7122.45	8430.48	4346.49	4027.3	3056.4	3559.53	11238.3	8533.34	10184.1	6843.69	8065.3	6546.86	4021.57	P08571
sp|P0CG38|POTEI_HUMAN	12562	15441.3	15790.9	3239.08	2294.84	4304.49	11495	1772.31	3563.64	2338.91	4363.44	13767.7	8301	4561.24	4724.77	P0CG38
sp|P11021|GRP78_HUMAN	1449.62	1288.06	4613.02	1861.35	1733.77	4960.11	1898.6	4265.49	2594.43	2987.32	2420.48	1676.99	1733.89	1959.72	3355.02	P11021
sp|P11597|CETP_HUMAN	456.2	519.848	220.657	496.448	233.076	381.834	351.572	394.111	732.915	322.139	215.601	1265.05	221.598	438.447	463.288	P11597
sp|P12111|CO6A3_HUMAN	2221.26	5087.36	4088.67	4918.14	11710.5	2519.33	3639.15	2065.6	2446.25	1920.29	1476.97	3419.04	1234.9	1645.67	3517.26	P12111
sp|P13501|CCL5_HUMAN	586.594	1296.23	2528.27	817.24	1359.25	1151.02	527.332	927.345	657.049	913.567	180.601	1989.95	1065.3	1132.55	750.45	P13501
sp|P13796|PLSL_HUMAN	705.16	2988.09	3225.96	727.749	2583.69	1590.87	1533.36	2667.75	1886.65	1396.41	542.152	1470.76	15282	2672.66	3877.66	P13796
sp|P17936|IBP3_HUMAN	128382	103162	47211.1	20180	48861.8	54799.3	48193	38937.2	51790.3	76358.3	18112.1	52059.8	44448.3	16296.8	34040.1	P17936
sp|P22792|CPN2_HUMAN	28850.2	15731.2	15043.9	13505	10980.7	19583.6	12027.5	10909	15024.2	23209.3	24154.8	20845.4	16456	8868.16	9307.05	P22792
sp|P22891|PROZ_HUMAN	2621.24	19032.7	6038.4	4780.8	9164.46	3672.83	9187.46	11258.5	15078.2	5695.44	4502.01	20639.6	4931.92	13809.9	3400.86	P22891
sp|P26927|HGFL_HUMAN	89801	51841.6	35552.6	31741.4	40534.9	40860.4	40196.9	24830.6	38755	45377.3	19414.4	31522.9	39085.5	24212	28780.7	P26927
sp|P35858|ALS_HUMAN	890844	852491	631866	263322	52495.2	122160	344387	261331	334868	355642	425524	415517	581795	459152	588610	P35858
sp|P43121|MUC18_HUMAN	3724.67	4988.52	4892.52	1966.05	3061.89	3024.83	1916.19	9065.45	3242.46	8214.79	2337.27	4224.5	4800.21	1990.23	6040.79	P43121
sp|P43251|BTD_HUMAN	3202.18	5586	6232.6	9263.11	8423.6	5046.37	5111.09	5094.78	5806.17	3838.56	8466.17	7802.06	3230.02	4688.41	6003.37	P43251
sp|P61626|LYSC_HUMAN	8416.51	1956.33	2963.08	3028.56	6742.67	5229.12	5131.02	2984.74	31583.4	12415.3	6179.14	9249.13	8192.23	5374.11	7098.35	P61626
sp|P67936|TPM4_HUMAN	2669.47	2851.05	2060.16	1757.94	2774.69	4244.05	3204.32	2441.24	1734.09	1718.69	933.817	1635.9	1954.41	3411.38	5005.82	P67936
sp|P68871|HBB_HUMAN	11824	4131.16	28003.4	35353.9	9169.24	25102.5	22878.1	19549.6	24304.3	17740.5	28989.4	9947.36	5656.02	19522	5826.83	P68871
sp|Q12805|FBLN3_HUMAN	9693.93	13979.4	7509.8	28871.4	23002.5	20734.3	7619.53	13378.8	13098.1	27211.7	15812.8	17361.4	41487.8	15716.8	30315.4	Q12805
sp|Q13790|APOF_HUMAN	1436.79	9363.05	536.393	1164.54	4546.88	937.817	2868.65	7304.81	2607.28	1292.5	1977.03	1708.9	883.77	1843.05	992.283	Q13790
sp|Q15582|BGH3_HUMAN	4377.38	5366.73	10398.7	10226.3	16170.5	4718.6	5767	4478.33	6977.66	4671.36	9294.03	4510.22	3291.65	4667.4	11827.5	Q15582
sp|Q8WZ75|ROBO4_HUMAN	5498.46	7810.49	9319.61	6182.26	2023.81	5832.47	4876.11	4028.42	3284.77	3669.89	2851.46	4941.4	4716.04	4263.35	3362.28	Q8WZ75
sp|Q92954|PRG4_HUMAN	14734.8	14714.4	13507.7	14838.9	28869.8	14659.7	15649.9	10752.1	13591.3	11978.5	12419.8	11747.8	22636	16556.3	25197.4	Q92954
sp|Q96IY4|CBPB2_HUMAN	16709.9	22393.7	11024.8	1781.99	8264.12	17363.8	5339.37	4741.08	6591.4	5077.77	1462.7	3357.58	11599.8	3606.69	9295.11	Q96IY4
sp|Q96KN2|CNDP1_HUMAN	21429.6	5262.69	10505.9	7183.96	2806.14	21173.7	5099.92	5837.86	8947.92	19239.3	8783.07	6561.4	7355.31	2529.19	5437.55	Q96KN2
sp|Q96PD5|PGRP2_HUMAN	45854.1	42351.1	34436.3	17766.8	23465.3	33212.3	23465.2	15990.8	37836.1	21143.6	14636.4	20067.4	39862.8	14671.9	12866.1	Q96PD5
sp|Q9BXR6|FHR5_HUMAN	456.051	1076.66	473.253	217.114	955.744	2524.83	703.12	1020.3	459.006	627.069	917.542	638.338	879.093	438.187	1120.06	Q9BXR6
sp|Q9BYX7|ACTBM_HUMAN	10493.8	2725.99	1445.11	1082.32	1491.23	287.752	1218.73	1619.31	734.544	313.127	1442.43	531.758	2358.56	438.217	1672.46	Q9BYX7
sp|Q9H4A9|DPEP2_HUMAN	684.558	1620.15	2161.06	4746.88	1396.06	1566.43	3327.02	1593.66	5151.63	3616.59	9833.49	1439.24	3104.95	1161.57	2773.19	Q9H4A9
sp|Q9H8L6|MMRN2_HUMAN	946.862	1279.07	650.415	2201.32	809.86	3972.41	762.311	839.255	830.384	4975.76	1013.14	2081.8	627.925	996.51	1111.46	Q9H8L6
sp|Q9UGM5|FETUB_HUMAN	8847.72	10055.6	20293.7	26877.1	16230.2	42254.3	12479	11607.5	22818.8	28647.3	16848.7	14492.8	17225.5	13510.5	16771.9	Q9UGM5
sp|Q9Y490|TLN1_HUMAN	1252.74	950.143	1435.01	4851.53	1986.41	2179.73	3848.81	862.585	1412.42	1379.4	1826.14	7971.61	2320.36	2109.13	1085.42	Q9Y490
sp|Q9Y6Z7|COL10_HUMAN	2755.41	1611.62	3256.12	3788.92	4769.58	589.711	1981.13	2258.65	1966.41	728.768	3211.11	7689.19	2627.49	2889.44	1761.13	Q9Y6Z7
sp|O75636|FCN3_HUMAN	180088	87817.6	62846	22523.5	26461.8	35095.3	14657.6	19996.4	31110.3	80749.3	29993	107201	78621.1	60586.5	72196.3	O75636
sp|P00450|CERU_HUMAN	841917	983756	1.04191e+06	1.16007e+06	1.16433e+06	1.34689e+06	953330	1.04653e+06	1.24487e+06	973499	943624	961979	759651	725142	634014	P00450
sp|P00747|PLMN_HUMAN	665526	880669	763204	851926	665527	731920	926701	1.0616e+06	935827	805428	687476	879393	698931	680676	510263	P00747
sp|P00748|FA12_HUMAN	1.10022e+06	1.32111e+06	1.39339e+06	884756	678543	1.03444e+06	930811	945103	792726	906657	816238	965922	576578	535057	717881	P00748
sp|P00751|CFAB_HUMAN	1.09784e+06	1.19014e+06	1.38811e+06	1.61487e+06	1.56265e+06	1.74413e+06	1.37145e+06	1.28879e+06	1.41768e+06	1.53999e+06	1.60107e+06	1.5273e+06	1.35762e+06	1.28205e+06	1.35205e+06	P00751
sp|P00915|CAH1_HUMAN	11086	16001.6	16225.8	3339.04	3091.79	1781.81	6896.23	6359.3	4095.26	5311.06	13538.4	14971.5	4586.68	1962.06	7812.58	P00915
sp|P01019|ANGT_HUMAN	780222	970553	1.11362e+06	1.24494e+06	427229	517858	548389	352407	434767	938857	2.2219e+06	2.16591e+06	737163	564093	679024	P01019
sp|P01042|KNG1_HUMAN	335692	399142	482868	590209	481296	279450	407319	413524	566885	468455	553768	543532	215580	290240	305402	P01042
sp|P02749|APOH_HUMAN	772966	779431	1.10295e+06	422738	369549	433175	1.12202e+06	697989	630586	500514	596766	590033	604816	775519	695476	P02749
sp|P02774|VTDB_HUMAN	1.94867e+06	1.72942e+06	1.37318e+06	3.43472e+06	2.58336e+06	2.56684e+06	3.29039e+06	2.71572e+06	2.3582e+06	2.10119e+06	1.75216e+06	1.26524e+06	1.98611e+06	1.5124e+06	1.01619e+06	P02774
sp|P02790|HEMO_HUMAN	1.36146e+07	1.50057e+07	1.85994e+07	1.93345e+07	2.2475e+07	2.12529e+07	2.03801e+07	1.97067e+07	2.13341e+07	1.55217e+07	1.73851e+07	1.52372e+07	2.36795e+07	2.49582e+07	2.43812e+07	P02790
sp|P04217|A1BG_HUMAN	364247	400066	455622	316983	215228	156108	454545	352726	470010	254510	343365	309838	385872	275580	356276	P04217
sp|P05155|IC1_HUMAN	696541	717253	946842	800953	481733	348245	264569	217240	196320	1.58717e+06	1.57908e+06	1.49313e+06	180710	163885	227403	P05155
sp|P08603|CFAH_HUMAN	947915	663983	1.22795e+06	1.08437e+06	1.34989e+06	1.46397e+06	1.55932e+06	1.66494e+06	1.44301e+06	1.03664e+06	1.04919e+06	978971	1.47091e+06	1.18232e+06	1.55278e+06	P08603
sp|P0C0L4|CO4A_HUMAN	977189	1.04821e+06	638392	362266	335514	334370	68423.3	485930	330433	342273	450875	66617.7	448915	402119	516339	P0C0L4
sp|P19823|ITIH2_HUMAN	390085	444714	511363	353253	110227	166317	177346	159661	193785	485188	409649	462648	184503	198974	230892	P19823
sp|P27918|PROP_HUMAN	342189	301147	350981	19732.4	45731.5	43005.6	325196	242411	306669	319382	285032	298039	403630	364633	420837	P27918
sp|P49747|COMP_HUMAN	21968.7	21817.8	36450.8	33803.7	8302.08	26493.3	33866.4	7384.34	15699.7	32172	26613.1	12042.9	17850.4	9965.73	10815.8	P49747
sp|Q16610|ECM1_HUMAN	303541	275848	195370	194856	178991	23410	238202	262896	213554	310562	165735	301972	181023	174837	191018	Q16610
sp|P00740|FA9_HUMAN	123458	120277	164192	134484	143873	183154	167535	188638	208889	90833.2	83444.2	168970	35543.3	68031.2	141284	P00740
sp|P04004|VTNC_HUMAN	331320	310564	457109	799041	914731	975495	629283	658922	641745	115038	228904	684916	248543	222625	363559	P04004
sp|P00746|CFAD_HUMAN	71685.5	76508.6	8191.15	7090.09	5102.98	9890.1	2683.67	3378.53	6079.85	2512.82	482.663	510.941	4607.29	4302.55	2218.15	P00746
sp|P02751|FINC_HUMAN	228867	197349	118748	169422	73245	78712.2	72816.8	63499.8	54013.1	80690.2	74781	104889	50555.6	67339.8	101543	P02751
sp|P0C0L5|CO4B_HUMAN	195743	175099	134585	150671	130186	162271	98774.5	82394.2	134358	165287	174705	148750	182984	161405	156420	P0C0L5
sp|Q6EMK4|VASN_HUMAN	26604.8	34284	33889.6	2205.1	5648.97	10505.8	3594.43	3431.37	7431.08	8404.81	11979.2	2318.53	3225.85	7037.42	6630.3	Q6EMK4
sp|P02753|RET4_HUMAN	153783	192769	196385	214545	220260	80970.1	191631	157030	194158	282113	272981	276231	96817.4	85511.9	99090.2	P02753
sp|P02765|FETUA_HUMAN	256418	273034	329204	212155	242165	92678.8	295136	213727	73500.2	340038	449568	329849	45892.8	103978	68230.1	P02765
sp|P08697|A2AP_HUMAN	86957.3	41122.5	107879	85189.3	77695.2	90707.6	68878	51971.5	52838.4	142511	153714	174806	66631.6	58312.3	60049.5	P08697
sp|P27169|PON1_HUMAN	41812.2	31324.7	35229	7551.44	3816.25	4775.42	26199.4	18614.9	15806.7	18832.8	23056.7	20176.8	12333	6588.36	10945.4	P27169
sp|P36955|PEDF_HUMAN	115997	95170	84593.7	53295.9	31165.6	32167.7	60671.1	87769.2	60209.8	112030	92682.3	205264	53066.2	51993.2	98663	P36955
sp|P49908|SEPP1_HUMAN	66956.5	44382.3	34059.3	58498.9	44651.3	42633.3	31695.5	70250.6	25020.4	126077	31868.3	85155.5	53281.9	34478.6	20585.8	P49908
sp|P63261|ACTG_HUMAN	15047.5	20759.7	19715	1941.93	1571.3	699.685	11577.9	15328.5	4747.55	18326.7	10717.8	17024.1	11059.7	8069.8	14986.7	P63261
sp|Q04756|HGFA_HUMAN	76333.3	79149.1	132757	14498.4	8616.89	18205.4	109668	40703	28582.8	17539.8	61699.9	30396.1	10538.6	19130.8	13015.2	Q04756
sp|Q6S8J3|POTEE_HUMAN	1098.36	1743.38	725.978	1685.65	1541.4	5076.65	1782.72	982.139	1433.29	4351.24	1799.65	3744.92	878.644	837.459	1584.41	Q6S8J3
sp|Q9UMS5|PHTF1_HUMAN	11996.9	15247.4	15213.1	1689.2	1307.04	899.068	10407	12808.8	998.111	10314.5	1059.59	17391.9	1219.53	604.884	1153.52	Q9UMS5
sp|A5A3E0|POTEF_HUMAN	260.886	1856.06	1163.86	3695.49	1541.4	1817.98	1916.56	935.895	410.215	1491.58	5145.01	309.655	878.644	1719.09	364.144	A5A3E0
sp|O00299|CLIC1_HUMAN	1341.69	1209.3	12401.6	2746	4686.8	2675.22	3147.24	871.406	359.195	467.291	1294.52	4332.92	14896.6	1890.56	492.484	O00299
sp|O14786|NRP1_HUMAN	2623.6	2209.48	2404.76	2397.53	2937.07	3325.12	2132.54	5855.94	6374.51	5979.64	2487.43	2399.86	6168.99	1986.8	5725.22	O14786
sp|O43866|CD5L_HUMAN	22164.3	5359.28	31969	15564.2	3501.48	3512.78	1517.09	28333.2	30690.4	20103	6763.88	1065.99	40674.8	37367	37317.3	O43866
sp|O75019|LIRA1_HUMAN	7624.97	7058.97	1995.73	1468.59	1028.33	668.97	2547.71	2805.87	505.065	4555.91	814.49	3771.01	2241.33	1205.77	1379.22	O75019
sp|O75144|ICOSL_HUMAN	1342.89	1181.13	1953.35	823.384	744.934	2148.96	527.29	472.639	493.138	4059.56	1636.38	845.782	376.528	4639.24	1044.23	O75144
sp|O75882|ATRN_HUMAN	215601	24303.7	33383.1	21299.7	20914.5	54840.7	25272.3	35506.1	42857.5	168316	17023.8	170273	65895.3	26731.4	50714.2	O75882
sp|P00451|FA8_HUMAN	500.488	1952.29	567.784	316.5	507.398	3610.68	426.998	1252.35	265.515	241.527	329.19	649.231	878.697	876.9	1123.94	P00451
sp|P00488|F13A_HUMAN	1872.71	11815.1	4929.09	11227.8	8616.91	31059.2	13457	15826.9	10680.7	1777.77	4605.57	6190.67	2633.67	13126.1	1386.45	P00488
sp|P00568|KAD1_HUMAN	2376.38	614.686	1011.31	3913.13	200.457	257.046	931.688	754.129	3059.47	4426.12	10049.4	6452.47	1265.9	876.722	531.077	P00568
sp|P00734|THRB_HUMAN	948755	914486	480598	372989	201210	278140	269031	232370	271701	463183	430102	425538	325176	216814	315556	P00734
sp|P00736|C1R_HUMAN	327921	267043	280915	323737	272453	337838	336307	321670	289960	384513	326586	402222	215617	196725	290957	P00736
sp|P00742|FA10_HUMAN	476758	220562	149696	45801.4	20438.1	50527.5	18241.9	198996	42504.7	279968	14011.7	226651	54676.2	10635.5	40357.3	P00742
sp|P01011|AACT_HUMAN	248599	214285	68424.3	69749.8	99949.1	43938.5	44310.2	58034.2	95421.7	99515.4	25320.5	93774.8	41157.3	66048.2	49026.1	P01011
sp|P01861|IGHG4_HUMAN	4368.09	450.054	3272.96	3472.19	1749.75	1563.12	2699.8	8427.54	240.385	9892.54	4209.17	820.939	2441	816.641	1964.35	P01861
sp|P02741|CRP_HUMAN	26861.8	5760.77	10477.3	73588.7	100252	14902.9	4229.45	64921	54071.5	0	59877.6	4743.14	119046	89571	80382.8	P02741
sp|P02743|SAMP_HUMAN	172192	56779.2	90370.3	68669.2	61851.7	69925.6	56994.1	41619.4	78177.8	45099.4	46704.9	29707.2	42441	63999.3	47562.7	P02743
sp|P02746|C1QB_HUMAN	14648.7	21270.5	4351.28	4730.69	7802.92	15971	17074.4	6902.95	24793.2	4144.61	3076.28	19231.6	4388.51	8292.79	16081.7	P02746
sp|P02775|CXCL7_HUMAN	166095	98090.5	54102.9	27258.8	102989	38961.6	58569.8	95031.2	11173.2	27417.7	21097.6	28923.5	99203.4	98677.8	15911.7	P02775
sp|P02776|PLF4_HUMAN	4475.57	8688.9	13624.3	11311.5	10054.6	8592.91	8870.04	5564.99	14646.2	13588.4	10647.2	11463	13452.6	10732.5	18779.9	P02776
sp|P02792|FRIL_HUMAN	652.205	5434.82	2301.54	1306.66	1848.44	1298.62	1350.88	6119.72	2197.31	1873.89	995.742	813.87	1206.07	3368.95	1719.78	P02792
sp|P03951|FA11_HUMAN	34672.9	33787	45901.5	57524.5	58600.4	20359.3	10833.3	52206.1	16556	72222.9	31515	8608.9	66494	47790	41145.4	P03951
sp|P03973|SLPI_HUMAN	4660.62	503.345	606.254	927.455	1576.92	1744.11	644.063	968.282	712.073	1377.23	2786.42	950.348	4140.91	775.396	6139.82	P03973
sp|P04003|C4BPA_HUMAN	19793.8	11607.5	30463.5	18952	38165.1	31989	11138.3	16111.1	40173.4	17094.3	9524.74	28841.7	24090.6	22192.8	28927.6	P04003
sp|P04040|CATA_HUMAN	807.837	1544.63	4087.93	5031.52	828.583	441.306	4105.23	5238.44	1522.05	2639.84	1980.47	227.712	580.056	1895.34	657.906	P04040
sp|P04070|PROC_HUMAN	4918.79	3304.18	3734.19	5274.58	4557.28	14156.1	1813.66	2917.23	5394.3	4007.02	6155.72	2162.85	3521.35	2098.07	4105.18	P04070
sp|P04114|APOB_HUMAN	38423.7	37123.1	61802.7	151515	62060.4	211619	111587	125105	130555	47179.9	116273	120652	66716.2	128586	56408.2	P04114
sp|P04264|K2C1_HUMAN	981.341	812.165	6573.79	5252.96	4967.7	4550.74	2563.24	1164.66	4087.55	4733.36	1064.74	2230.96	3899.28	3935.26	3641.98	P04264
sp|P04275|VWF_HUMAN	7799.73	33940.2	6927.05	16140.6	8260.44	13967	5849.59	43693.1	7215.47	48825.8	14091.3	21218.6	11280.1	6089.5	9460.73	P04275
sp|P04278|SHBG_HUMAN	45755.7	4438.6	4791.32	64972.2	64996.3	64576.3	3999.08	49036.3	3381.8	7493.55	4850.89	2883.17	5434.87	4573.23	27380.6	P04278
sp|P05019|IGF1_HUMAN	1366.1	4838.41	2928.24	3585.66	11062.3	3776.94	2300.34	2209.01	3390.07	6205.73	1439.65	5659.15	3508.88	2755.8	3843.03	P05019
sp|P05154|IPSP_HUMAN	532.167	2237.68	4287.9	2393.31	1763.33	3988.46	1889.68	3746.59	2832.42	3261.58	2206.52	1736.96	2222.48	6352.07	2465.16	P05154
sp|P05156|CFAI_HUMAN	371010	286636	405036	340397	337818	86506.6	511630	408580	320483	429060	296863	480038	250209	217272	220703	P05156
sp|P05160|F13B_HUMAN	125442	156298	146224	125604	132257	65617.8	161123	187675	153766	162974	140995	164289	129418	103911	94179.2	P05160
sp|P05362|ICAM1_HUMAN	19230.1	32102.2	19862.2	17286.4	9665.63	9842.91	38087.6	14296.3	4763.36	24037.5	15742.2	23808.9	14517.3	32022.6	24203.3	P05362
sp|P05556|ITB1_HUMAN	144.326	9595.97	7980.73	1370.02	9862.67	819.382	706.664	6880.07	240.047	274.594	745.07	904.86	1197.06	1399.16	420.05	P05556
sp|P06276|CHLE_HUMAN	6573.01	6386.61	4097.65	17016.1	14340.8	474.933	263.605	3248.07	2963.95	2079.56	1099.96	385.645	3651.13	9892.08	8217.78	P06276
sp|P06396|GELS_HUMAN	218506	307451	347349	70109.6	185169	153270	267745	197985	114419	227187	272295	158273	134470	101515	162354	P06396
sp|P06681|CO2_HUMAN	98033	93479.1	188074	262274	162695	161869	197649	232803	197399	133499	121849	159558	120011	104562	166326	P06681
sp|P06702|S10A9_HUMAN	1251.48	317.783	712.227	1068.67	311.408	2171.02	3130.44	935.919	825.387	2586.35	363.229	774.808	6280.43	767.289	1001.95	P06702
sp|P06727|APOA4_HUMAN	70945.2	55217.6	81481.7	148726	73767.7	180693	51821.3	123432	43786.3	61894.6	40418.1	73764.7	77692.2	126389	44208	P06727
sp|P07357|CO8A_HUMAN	57550.8	70305.1	56546.8	58613.8	79488	108791	51480.9	86151.4	72253.3	201484	63499.6	45275.1	88803.5	55997.7	66281.2	P07357
sp|P07359|GP1BA_HUMAN	641.014	14494	22627.7	4410.74	9623.83	12346.4	1586.41	1203.14	7490.76	620.568	3832.77	12459.5	2499.72	7214.78	18621.7	P07359
sp|P07360|CO8G_HUMAN	67885.1	55699.5	35004.6	98305.9	78886.5	96715.2	33069.9	82940.3	99756.2	101237	57741.7	47444.8	36370.5	89215	22347.1	P07360
sp|P07478|TRY2_HUMAN	168.118	19972	847.52	1907.49	704.799	592.841	880.995	236.262	19006	697.372	2270.4	1007.15	21296.3	751.517	839.851	P07478
sp|P07996|TSP1_HUMAN	2592.59	4245.63	3039.75	5992.41	4970.63	2930.03	1512.7	5195.69	5459.05	4509.68	2196.81	609.441	3261.18	5272.71	2027.56	P07996
sp|P08294|SODE_HUMAN	881.551	3826.29	5555.49	1473.36	4430.9	5024.93	374.799	9224.36	813.281	3529.77	3459.94	2446.64	499.899	971.512	15776.7	P08294
sp|P08519|APOA_HUMAN	8348.53	1171.49	1797.06	23398.2	3496.1	3538.68	1641.17	12921.7	1881.32	9622.38	1384.78	3744.61	1622.59	2314.79	7817.7	P08519
sp|P09172|DOPO_HUMAN	13184.5	13133.7	15116.6	12651	5482.02	12050.9	13142.7	13318.7	15958.9	18591.4	9449.24	18200.3	10013.4	5232.04	10356	P09172
sp|P09486|SPRC_HUMAN	1741.52	5511.15	3254.67	3947.03	5943.22	14264.2	6149	3788.28	3135.89	3538.4	1339.01	1550.94	6557.48	1969.33	2056.65	P09486
sp|P09871|C1S_HUMAN	1.10662e+06	560351	561156	55004.1	94872.5	116319	107558	883390	76439.3	1.01393e+06	44934.8	731973	36348	81553.2	45348.7	P09871
sp|P0CG06|LAC3_HUMAN	1225.03	25481.7	2652.56	27546.9	1655.07	31372.2	790.388	708.678	2315.37	487.1	2074.75	32053.6	29163.7	2172.11	61162.3	P0CG06
sp|P10124|SRGN_HUMAN	7629.25	1480.96	8854.71	8259.76	12225.1	1234.65	8644.93	376.32	1936.97	4529.57	5162.36	3583.88	1149.02	2568.24	1220.76	P10124
sp|P10643|CO7_HUMAN	271412	268771	300887	246127	152080	182720	277367	253954	223090	173750	199837	144072	181562	216285	255291	P10643
sp|P10720|PF4V_HUMAN	140.026	8939.6	1027.59	10330	7550.05	5933.75	11604	7915.27	12690.3	923.243	3777.72	476.723	3029.87	1164.29	8981.13	P10720
sp|P10909|CLUS_HUMAN	122637	134525	125078	125362	67821.4	105831	134657	123263	115501	157688	244802	137131	133029	76771.4	30300	P10909
sp|P11226|MBL2_HUMAN	35905.5	26248.4	2792.44	1116.09	2920.09	2875.86	14376.7	10887	28925	2325.86	2610.39	2659.27	7046.49	5345.16	28171.2	P11226
sp|P11362|FGFR1_HUMAN	2453.51	6439.97	9540.5	10874.5	440.403	13426.8	9437.38	699.59	5838.44	598.124	7961.16	2275.86	14181.4	4355.76	2741.98	P11362
sp|P11717|MPRI_HUMAN	3110.46	1590.72	14556.1	21189	3380.1	31152.8	11942.2	3394.5	1506.65	15576.2	13958.6	1103.22	9704.67	3869.31	1032.2	P11717
sp|P12259|FA5_HUMAN	14324.7	16299.4	24806.4	28049.5	33173.1	10298.2	20845.8	21411.5	16790.1	19150.4	23390.5	18280.4	23767.6	24877.9	28964.5	P12259
sp|P13598|ICAM2_HUMAN	357.79	1128.36	471.086	870.923	294.767	1502.53	834.574	3185.98	414.583	533.44	2277.76	483.369	1023.92	1298.51	950.429	P13598
sp|P13671|CO6_HUMAN	564721	531553	256129	203287	441620	521518	197589	285030	353734	470976	309517	430186	245851	402717	179671	P13671
sp|P14151|LYAM1_HUMAN	28953	10653.5	2489.07	3230.31	2149.39	7496.9	1584.46	30488	2965.14	3581.91	6792	3921.82	4325.68	2842.17	3967.32	P14151
sp|P14543|NID1_HUMAN	6493.4	938.275	9213.74	394.511	12239.8	14460.8	6845.44	639.984	10096.2	9267.82	1879.47	933.921	769.696	5121.34	930.498	P14543
sp|P14618|KPYM_HUMAN	1036.01	40720.5	834.404	5637.93	2356.48	7687.33	77689.5	546.078	1388.79	1009.95	1459.61	2025.89	59067.9	2441.28	4107.66	P14618
sp|P15169|CBPN_HUMAN	13260	10608.9	20390.4	7453.33	5547.51	4954.74	29498.3	10340.9	6838.48	35347.8	12196.3	13923.1	9073.09	5009.58	24223.2	P15169
sp|P16035|TIMP2_HUMAN	4162.05	1845.44	6423.52	3298.59	3505.47	4108.56	2395.58	672.797	1541.51	1246.87	4910.46	3922.95	3779.51	1883.1	1398.65	P16035
sp|P16070|CD44_HUMAN	101472	9248.21	1224.02	32659.6	1695.61	5412.23	2519.21	16529.1	32968.9	3052.28	5140.03	4016.17	4609.99	14781.5	2056.66	P16070
sp|P16581|LYAM2_HUMAN	1187.99	1175.42	524.652	700.255	3497.84	6003.04	390.394	1916.6	212.945	3244.77	1249.07	695.46	501.888	1297.4	1591.22	P16581
sp|P18065|IBP2_HUMAN	1354.64	840.482	1283.88	2344.64	485.92	3532.56	959.742	1559.29	997.916	1631.64	1908.5	181.376	290.526	328.543	1002.93	P18065
sp|P19827|ITIH1_HUMAN	589770	452307	173677	176934	140461	149874	174530	233294	144894	131306	77835.4	411026	112000	52606.6	74125.6	P19827
sp|P20742|PZP_HUMAN	9538.69	22333.8	4273.65	5067.64	5678.91	4495.92	23576.4	4081.67	5058.67	3451.06	6033.19	2571.1	8594.53	4448.36	6983.75	P20742
sp|P20851|C4BPB_HUMAN	3795.13	49737	2268.76	33382.4	1919.7	3387.91	5081.41	53970	5443.61	2447.12	67217.3	7293.61	7188.26	46125.3	4959.13	P20851
sp|P22352|GPX3_HUMAN	3334.6	6293.61	3685.48	12939.5	9303.73	15408.9	7809.7	5279.24	13403.9	14814	5379.64	4874.92	4936.94	5001.28	3253.32	P22352
sp|P22692|IBP4_HUMAN	3202.85	3321.64	8900.55	3603.47	5572.5	12215.1	6593.28	7245.41	7147.7	4789.98	5915.63	48104.1	4929.59	45832.5	8694.95	P22692
sp|P23142|FBLN1_HUMAN	51652.7	44961.9	54828.9	32269.4	50799.7	51548	56554.8	43141.4	24647	53062.2	35635.8	81199.8	16470.3	41674.9	47355.7	P23142
sp|P23470|PTPRG_HUMAN	1255.96	1539.71	1094.14	1003.87	1274.68	1925.39	3640.41	1417.68	5714.57	891.317	794.717	4211.93	4953.42	1204.12	3565.24	P23470
sp|P24593|IBP5_HUMAN	884.065	7590.93	850.514	878.278	1072.5	2574.87	684.454	7421.1	1424.58	365.325	1712.18	5418.39	2354.43	633.456	3165.53	P24593
sp|P25311|ZA2G_HUMAN	2417.25	1014.65	2171.72	3310.17	1858.95	1288.34	2350.63	823.991	2643.01	9327.48	1897.28	1808.67	2900.04	2011.14	1289.61	P25311
sp|P29622|KAIN_HUMAN	3786.77	3899.29	4382.75	2689.63	3592.97	5514.15	2229.46	2479.36	7850.74	4410.95	3889.39	4297.83	4721.56	139887	1938.57	P29622
sp|P33908|MA1A1_HUMAN	620.456	9930.09	733.186	2366.75	2642.5	260.358	11759.4	941.088	2355.49	566.558	3824.85	4161.18	3551.66	1727.27	1319.7	P33908
sp|P35555|FBN1_HUMAN	10180.9	2025.02	1430.63	6854.47	6259.78	889.067	24750.1	900.926	1073.62	3078.19	1270.92	540.822	2489.71	3051.64	6205.62	P35555
sp|P35916|VGFR3_HUMAN	5613.54	6911.7	6523.14	5762.62	1869.67	2962.91	4618.76	4395.75	4345.67	1508.83	68736.8	50840.9	4853.52	3193.51	2096.13	P35916
sp|P35968|VGFR2_HUMAN	636.166	584.901	1024.67	3731.86	3518.61	2076.69	351.552	832.599	684.899	719.375	505.795	4396.36	641.665	1125.08	459.285	P35968
sp|P36980|FHR2_HUMAN	3209.84	5195.3	6063.02	4455.95	4154.07	5674.75	6975.31	3731.98	3376.38	4134.53	5313.19	6358.77	5459.69	12550.9	2807.85	P36980
sp|P43652|AFAM_HUMAN	896993	610043	214791	468837	485210	606941	127545	303430	476745	264908	162733	224689	245325	460661	282747	P43652
sp|P49591|SYSC_HUMAN	4331.36	2247.12	315.667	1087.56	17055	2338.26	1804.39	9919.54	2253.7	910.409	663.684	1010.93	651.522	10796.8	2813.97	P49591
sp|P51884|LUM_HUMAN	438945	446786	37599	32981.1	37126.1	62554	56217	271725	54828.3	257149	52681.7	276531	76330.8	40263	27067.1	P51884
sp|P60709|ACTB_HUMAN	335.235	1783.72	893.765	6509.94	1374.2	2747.83	1916.56	2449.38	410.215	2031.81	1851.45	1284.77	1149.64	1692.95	201.099	P60709
sp|P62328|TYB4_HUMAN	61450	49852.9	39565.5	22000.7	2153.04	10373.9	34864.3	44453.1	4444.33	32282.3	2624.68	23748.2	33035.7	31123.7	2983.5	P62328
sp|P69905|HBA_HUMAN	7456.67	35544	13152.6	66563	3850.28	36885.8	18770.1	23568	17713.5	3774.64	10836.3	17195.9	8251.82	32636.1	12868.6	P69905
sp|Q03591|FHR1_HUMAN	3635.99	6131.28	6126.43	5033.11	7133.05	10933.6	2092.78	11910	6792.59	8290.98	8065.04	11013	65329.1	6907.6	5864.97	Q03591
sp|Q06033|ITIH3_HUMAN	4757.23	10754.4	17969.1	9822.63	34389	40316.2	8507.8	6489.43	42120.7	8790.75	10264.2	21856	10445.6	6379.56	45749.9	Q06033
sp|Q07954|LRP1_HUMAN	1542.77	237.94	6331.91	2935.36	2012.7	1026.71	590.784	2214.12	5454.94	2462.21	5027.26	564.408	2213.82	1699.47	5871.57	Q07954
sp|Q10588|BST1_HUMAN	450.138	253.292	1617.91	2759.64	1738.88	1979.34	1287.12	3719.61	244.727	2065.02	545.994	483.126	2186.41	1154.82	987.002	Q10588
sp|Q12841|FSTL1_HUMAN	8272.06	3053.56	3558.16	3781.41	1494.34	2896.95	3324.02	6879.89	1329.43	1751.79	4571.49	1300.86	3807.81	4305.06	4502.71	Q12841
sp|Q13201|MMRN1_HUMAN	1271.47	2011.49	1681.04	4965.6	1316.87	3751.48	5538.68	219.394	257.205	2428.71	684.008	905.129	1208.83	3444.96	347.476	Q13201
sp|Q13424|SNTA1_HUMAN	195.53	302.611	1614.35	1009.46	1381.09	750.118	867.35	5824.28	583.936	325.245	559.387	177.987	699.451	8204.22	802.892	Q13424
sp|Q14126|DSG2_HUMAN	1233.07	716.137	3159.92	7251.84	1477.47	7901.58	2293.54	701.634	1703.45	896.99	2080.02	1299.9	2392.4	2888.11	1312.85	Q14126
sp|Q14520|HABP2_HUMAN	47057.7	48685.5	27858.1	17561.4	17489.7	25093	34710.5	45766.6	20171	18217.5	16381.6	21884.2	15459.5	9093.75	11602.1	Q14520
sp|Q14624|ITIH4_HUMAN	565365	580740	433128	461336	501737	644352	364852	327797	413709	485279	480211	453743	307453	217617	254578	Q14624
sp|Q15113|PCOC1_HUMAN	4615.74	10883.4	16351.1	16081	5883.01	7907.78	15771.8	14476.7	8358.16	8500.5	10686.3	11694.2	7211.7	16000.9	2890.74	Q15113
sp|Q15848|ADIPO_HUMAN	1820.88	1823.95	1645.14	1592.35	2982.36	2421.45	3131.28	2783.13	2145.78	3125.35	973.276	1553.67	1907.16	1815.61	2948.54	Q15848
sp|Q16270|IBP7_HUMAN	1731.83	1397.01	5632.07	3923.54	6460.69	38763.4	1657.88	3076.32	3920.91	2386.92	731.609	2109.87	4605.79	723.655	10785.4	Q16270
sp|Q58FF8|H90B2_HUMAN	2051.68	757.639	320.172	1862.76	1813.49	3882.05	1466.11	345.563	3043.2	812.863	2524.89	1244.99	2542.48	2563.04	4028.61	Q58FF8
sp|Q6KC79|NIPBL_HUMAN	1388.52	3666.86	2295.92	9183.46	10811.9	1966.31	1324.35	2252.12	3029.19	1778.08	891.493	4396.53	4880.67	1403.1	3156.74	Q6KC79
sp|Q6UWN0|LYPD4_HUMAN	1226.78	4049.97	2295.8	4965.86	1327.91	985.045	3376.67	1965.95	3885.31	1273.85	4894.59	4809.13	5792.51	1361.63	3151.33	Q6UWN0
sp|Q6UXB8|PI16_HUMAN	1908.21	845.158	1427.64	3129.95	1829.69	8120.89	836.785	289.173	2181.75	2428.05	2237.01	3409.61	4034.89	6976.59	612.012	Q6UXB8
sp|Q6UY14|ATL4_HUMAN	960.429	329.084	565.329	490.653	750.229	869.986	461.638	963.21	508.474	12124	343.857	1457.76	1004.67	1096.08	595.709	Q6UY14
sp|Q76LX8|ATS13_HUMAN	1214.46	75660.9	1246.18	12745.9	10374.9	14057.9	3234.01	52735.2	634.353	491.032	1530.58	492.841	11677.7	4299.4	18539.5	Q76LX8
sp|Q7Z7G0|TARSH_HUMAN	174.494	920.979	7331.51	1826.09	338.755	3861.03	906.048	1560.42	2303.9	442.256	1445.82	1305.19	816.377	868.849	803.139	Q7Z7G0
sp|Q86UD1|OAF_HUMAN	414.204	490.414	1808.47	1014.72	969.519	2947.98	592.449	1683.9	945.626	1196.34	4540.07	1359.12	868.769	1485.64	828.772	Q86UD1
sp|Q86VB7|C163A_HUMAN	1735.14	5157.38	1739.03	3688.65	9808.01	38404.1	9690.52	210.556	7739.74	6010.83	1566.33	473.257	280.945	462.441	8814.14	Q86VB7
sp|Q8IXL6|DMP4_HUMAN	3917.6	614.419	2120.67	4776.49	41765.4	26976.2	45187.8	408.541	5484.88	740.975	54181.1	2824.86	7398.58	2712.3	6079.89	Q8IXL6
sp|Q99969|RARR2_HUMAN	533.051	1045.47	6222.7	1253.78	2509.31	2120.11	5194.02	1397.9	5535.93	4745.75	3241.39	10840.6	2464.3	966.458	35513.5	Q99969
sp|Q9BWP8|COL11_HUMAN	1789.5	764.236	3073	3747.01	17206.4	19373.9	4641.96	4209.7	610.595	3882.42	11714.8	2473.61	851.724	10452.9	1815.06	Q9BWP8
sp|Q9H4B8|DPEP3_HUMAN	150.023	0	0	165.487	0	191.833	0	0	0	0	0	230.08	0	328.818	0	Q9H4B8
sp|Q9NPH3|IL1AP_HUMAN	10548.6	8697.06	8014.18	752.441	1855.35	2272.02	3589.96	5758.41	421.876	1884.1	4952.83	1551.61	2137.78	743.391	3877.05	Q9NPH3
sp|Q9NPY3|C1QR1_HUMAN	1033.5	2700.13	49483.8	10112.8	2470.67	5692.57	1457.27	38078.1	35594.1	8060.74	2563.28	630.419	33925.2	1281.22	34540.4	Q9NPY3
sp|Q9NQ79|CRAC1_HUMAN	13815.5	4929.41	34555.5	13779.5	10274.8	14286.2	14564.8	16530.9	47995.1	53313.6	10781.7	51356.5	7980.9	5915.57	20832.2	Q9NQ79
sp|Q9NZP8|C1RL_HUMAN	23342.5	4257.73	14573.8	3386.09	3427.75	4511.39	5803.76	6135.95	6213.42	16164.5	2886.23	15431.6	7203.07	2470.32	4867.97	Q9NZP8
sp|Q9UK55|ZPI_HUMAN	5427.08	6550.71	11866	39581.4	41941.2	48427.9	7498.3	8244.05	35691.8	13326.5	50283.3	38962.3	49124.8	41232.5	42977.8	Q9UK55
sp|Q9UM47|NOTC3_HUMAN	610.013	2201.68	1201.85	5361.33	2676.12	5038.79	1927.53	1351.21	1029.92	2097.76	2186.73	288.813	978.644	1237.35	1013.55	Q9UM47
sp|Q9UNW1|MINP1_HUMAN	22616.1	7605.07	55407	28090.1	31406.7	4015.41	63120.8	44846.7	53016	4465.23	65164.6	30660.7	13027.9	25991.1	21301.4	Q9UNW1
sp|Q9Y5Y7|LYVE1_HUMAN	13168.9	2270.6	1522.8	3642.61	1430.08	4016.78	21594.7	11884.7	22345.9	1330.07	6734.1	7126.02	18592	17722.8	22028	Q9Y5Y7
sp|Q9Y646|CBPQ_HUMAN	10185.9	1699.25	1012.05	2876.55	25544.7	2837.19	4406.64	1599.65	29595.7	14946.4	1473.88	1279.36	663.41	625.015	10177.6	Q9Y646
sp|Q9Y6R7|FCGBP_HUMAN	21585.6	21184.8	26107.1	60464	28122	50162.8	18200.8	16708	43481.4	34336.9	11588.2	21179.2	16334.3	26362.1	20563.4	Q9Y6R7
