# Supplementary material for: Potential early clinical stage colorectal cancer diagnosis using a proteomics blood test panel
Source: Clin Proteomics. 2019 Aug 28;16:34. doi: 10.1186/s12014-019-9255-z (PMC6712843; doi:10.1186/s12014-019-9255-z)
Supplement: Supplementary file 6 — Additional file 6: Table S5. List of 37 potential CRC biomarker protein candidates. [file 12014_2019_9255_MOESM6_ESM.xlsx]

## Sheet: Sheet1
Differentially expressed proteins in each depletion methods
Non depleted plasma
			Fold Changes (CRC stages / Healthy)				p-values (Anova)
Gene ID	Uniprot ID	Protein Names	A/H	B/H	C/H	D/H					present in both Non depletion and MARS-14
S100A8	P05109	Protein S100-A8	3.14 ↑	5.81 ↑	6.49 ↑	12.69 ↑	0.007				present in both MARS-14/API and MARS-14
SAA1	P0DJI8	Serum amyloid A1 protein	1.84 ↑	3.11 ↑	2.13 ↑	3.95 ↑	0.002				present in both API/MARS-14 and MARS-14
SAA2	P0DJI9	Serum amyloid A2 protein	1.46 ↑	3.01 ↑	1.97 ↑	3.27 ↑	< 0.0001
MARCO	Q9UEW3	Macrophage receptor	6.26 ↑	2.76 ↑	17.41 ↑	19.45 ↑	0.032
MECP2	P51608	Methyl-CpG-binding protein 2	2.52 ↓	3.24 ↓	6.43 ↓	9.89 ↓	0.01
MRC1	P22897	Macrophage mannose receptor 1	5.41 ↓	2.03 ↓	3.89 ↓	2.42 ↓	0.041
SOD3	P08294	Extracellular superoxide dismutase	5.20 ↓	2.75 ↓	1.55 ↓	1.54 ↓	0.02
M-14 Depleted Plasma
SAA2	P0DJI9	Serum amyloid A-2 protein	1.52 ↑	1.81 ↑	2.10 ↑	2.66 ↑	0.032
GPX3	P22352	Glutathione peroxidase 3	2.03 ↑	2.46 ↑	9.15 ↑	2.15 ↑	0.012
PCDHGA8	Q9Y5G5	Protocadherin gamma-A8	3.37 ↑	2.14 ↑	10.92 ↑	2.46 ↑	0.008
PFN1	P07737	Profilin-1	2.34 ↓	1.77 ↓	2.57 ↓	2.14 ↓	0.047
COMP	P49747	Cartilage oligomeric matrix protein	1.62 ↓	1.25 ↓	1.67 ↓	1.58 ↓	< 0.0001
CPQ	Q9Y646	Carboxypeptidase Q	2.13 ↓	1.78 ↓	1.69 ↓	5.42 ↓	0.002
MASP2	O00187	Mannan-binding lectin serine protease 2	2.82 ↓	1.51 ↓	2.01 ↓	1.57 ↓	0.018
CST3	P01034	Cystatin-C	1.51 ↓	1.06 ↓	1.39 ↓	1.34 ↓	0.0004
CFD	P00746	Complement factor D	1.15 ↓	1.23 ↓	1.18 ↓	1.80 ↓	0.001
API and MARS14 Depleted
F2	P00734	Prothrombin	↓2.71	↓2.9	↓1.7	↓2.65	0.02
HGFAC	Q04756	Hepatocyte growth factor activator	↓7.07	↓1.84	↓2.89	↓6.73	0.04
PON1	P27169	Serum paraoxonase/arylesterase 1	↓6.95	↓1.81	↓1.74	↓3.7	0
CST3	P01034	Cystatin-C	↓6.83	↓5.7	↓6.6	↓9.9	0.04
ADAMDEC1	O15204	ADAM DEC1	↑3.98	↑3.9	↑4.5	↑2.46	0.02
POTEKP	Q9BYX7	Putative beta-actin-like protein 3	4.46491	3.05516	5.56258	2.88108	0.00174673
POTEI	P0CG38	POTE ankyrin domain family member I	4.57458	3.48125	2.7935	2.57742	0.00303562
VASN	Q6EMK4	Vasorin	6.18155	6.96075	5.09702	5.89987	0.0404997
SERPINA6	P08185	Corticosteroid-binding globulin	6.48347	3.58172	5.29831	2.29098	0.00177931
C1QC	P02747	Complement C1q subcomponent subunit C	8.85523	2.56555	2.89962	2.84865	0.00670257
AMBP	P02760	Protein AMBP	8.99147	7.36042	4.474	10.1774	0.0052696
PHTF1	Q9UMS5	Putative homeodomain transcription factor 1	11.192	2.75522	2.44634	14.8433	0.0151611
C4A	P0C0L4		2.52455	3.90437	3.99177	1.91435	0.0468407
APOC2	P02655	Apolipoprotein C-II	2.16129	2.1456	4.23878	2.10656	3.82831e-05
ROBO4	Q8WZ75	Roundabout homolog 4	1.76353	1.83739	1.9781	1.80905	0.0071221
CFD	P00746	Complement factor D	↓5.01	↓9.3	↓41.7	↓10.0	0.03
MARS14 and API Depleted
COL6A3	P12111	Collagen alpha-3(VI) chain	↑3.53	↑4.35	↑16.29	↑1.05	0.0395451
APOB	P04114	Apolipoprotein B-100	↑1.89	↑2.68	↑2.87	↑2.33	0.00808006
APCS	P02743	Serum amyloid P-component (SAP)	↑2.01	↑1.98	↑2.7	↑4.3	0
APOC3	P02656	Apolipoprotein C-III	↑1.99	↑1.72	↑1.63	↑1.15	0.00417065
ITIH3	Q06033	Inter-alpha-trypsin inhibitor heavy chain H3	↑2.68	↑2.03	↑1.46	↑1.4	0.038412
GPX3	P22352	Glutathione peroxidase 3	↑2.68	↑2.2	↑1.36	↑2.09	0.0113382
APOA4	P06727	Apolipoprotein A-IV	↓2.7	↓1.78	↓2.32	↓2.27	0
APOA2	P02652	Apolipoprotein A-II	↓4.35	↓6.25	↓12.5	↓1.54	0.0122273
F13A1	P00488	Coagulation factor XIII A chain	↓2.17	↓3.70	↓1.78	↓1.30	0.0171694
